# Supplementary material for: TimeNexus: A Novel Cytoscape App to Analyze Time-Series Data Using Temporal MultiLayer Networks (tMLNs)
Source: Research Square preprint supplement (doi:10.21203/rs.3.rs-133258/v1), 2020-12-31
Supplement: Supplementary file 1 [file 024bf4c29592d99381e528c9.xlsx]

## Sheet: Notes on Suppl. Table S5
TimeNexus: a novel Cytoscape app to analyze time-series data using temporal MultiLayer Networks (tMLNs)
Michaël Pierrelée 1, Ana Reynders 2, Fabrice Lopez 3, Aziz Moqrich 2, Laurent Tichit 4 and Bianca H. Habermann 1
Supplementary Table with Information on the KEGG core cell cycle tables for TimeNexus, as well as enrichment of resulting active subnetworks using modEnrichr
a. node table uploaded to TimeNexus for building the yeast KEGG cell cycle tMLN
b. intra-layer edge table uploaded to TimeNexus for building the yeast KEGG cell cycle tMLN
c. inter-layer edge table uploaded to TimeNexus for building the yeast KEGG cell cycle tMLN
d. modEnrichr enrichment of the active subnetwork extracted from the first three time-points of the yeast cell cycle (0-10min)
e. modEnrichr enrichment of the active subnetwork extracted from the late time-points of the yeast cell cycle (60-70min)

## Sheet: a. NodeTable yeast cell cycle
Node	Core	Weight_0min	Weight_5min	Weight_10min	Weight_60min	Weight_65min	Weight_70min	Query_0min	Query_5min	Query_10min	Query_60min	Query_65min	Query_70min	GeneName
YNL172W	TRUE	0.124451	0.149621	0.126624	0.0799502	0.0672093	0.0584232	FALSE	FALSE	FALSE	FALSE	FALSE	FALSE	APC1
YDL008W	TRUE	0.0188036	0.00722591	0.0193985	0.0245197	0.0190433	0.0364548	FALSE	FALSE	FALSE	FALSE	FALSE	FALSE	APC11
YLR127C	TRUE	0.0300682	0.00131083	0.0125756	0.0463318	0.0139717	0.0448996	FALSE	FALSE	FALSE	FALSE	FALSE	FALSE	APC2
YDR118W	TRUE	0.00477009	0.0262775	0.0304703	0.0207048	0.0128271	0.00492094	FALSE	FALSE	FALSE	FALSE	FALSE	FALSE	APC4
YOR249C	TRUE	0.0165049	0.012412	0.0234754	0.0124003	0.0674741	0.0229146	FALSE	FALSE	FALSE	FALSE	FALSE	FALSE	APC5
YLR102C	TRUE	0.0573806	0.0570722	0.0818974	0.0536631	0.00598008	0.0126046	FALSE	FALSE	FALSE	FALSE	FALSE	FALSE	APC9
YJR053W	TRUE	0.00248064	0.0939999	0.247863	0.204832	0.166101	0.0498829	FALSE	FALSE	FALSE	FALSE	FALSE	FALSE	BFA1
YBL097W	TRUE	0.167086	0.00135006	0.0253319	0.053804	0.112171	0.0465718	FALSE	FALSE	FALSE	FALSE	FALSE	FALSE	BRN1
YGR188C	TRUE	0.195397	0.196983	0.296319	0.107157	0.0716459	0.0382237	FALSE	FALSE	TRUE	FALSE	FALSE	FALSE	BUB1
YMR055C	TRUE	0.0650965	0.0531304	0.147132	0.138354	0.0544953	0.0770521	FALSE	FALSE	FALSE	FALSE	FALSE	FALSE	BUB2
YOR026W	TRUE	0.156207	0.133149	0.110043	0.0242545	0.0153257	0.0196704	FALSE	FALSE	FALSE	FALSE	FALSE	FALSE	BUB3
YFL029C	TRUE	0.00682013	0.0227648	0.0013122	0.00990791	0.0255143	0.00423575	FALSE	FALSE	FALSE	FALSE	FALSE	FALSE	CAK1
YFR028C	TRUE	0.0759374	0.0223066	0.0739762	0.121998	0.0780755	0.0477737	FALSE	FALSE	FALSE	FALSE	FALSE	FALSE	CDC14
YAR019C	TRUE	0.0430296	0.0131493	0.0106186	0.00874027	0.0320482	0.0221973	FALSE	FALSE	FALSE	FALSE	FALSE	FALSE	CDC15
YKL022C	TRUE	0.0397338	0.0319927	0.028614	0.0436158	0.00969965	0.0104884	FALSE	FALSE	FALSE	FALSE	FALSE	FALSE	CDC16
YGL116W	TRUE	0.309085	0.396825	0.652523	0.130241	0.0723641	0.053816	TRUE	TRUE	TRUE	FALSE	FALSE	FALSE	CDC20
YHR166C	TRUE	0.00616994	0.0231098	0.0182864	0.0278037	0.0315094	0.0143687	FALSE	FALSE	FALSE	FALSE	FALSE	FALSE	CDC23
YFR036W	TRUE	0.112652	0.0842646	0.116199	0.0409126	0.0595042	0.00347638	FALSE	FALSE	FALSE	FALSE	FALSE	FALSE	CDC26
YBL084C	TRUE	0.0431638	0.0196788	0.0199977	0.0618222	0.024463	0.0254574	FALSE	FALSE	FALSE	FALSE	FALSE	FALSE	CDC27
YBR160W	TRUE	0.143517	0.133323	0.152767	0.0299025	0.00867666	0.010055	FALSE	FALSE	FALSE	FALSE	FALSE	FALSE	CDC28
YFL009W	TRUE	0.0287011	0.020786	0.0231081	0.0250567	0.0112887	0.0352313	FALSE	FALSE	FALSE	FALSE	FALSE	FALSE	CDC4
YLR103C	TRUE	0.395338	0.293986	0.274278	0.124396	0.129082	0.0915826	TRUE	TRUE	TRUE	FALSE	FALSE	FALSE	CDC45
YMR001C	TRUE	0.524118	0.332445	0.178372	0.0763521	0.148264	0.225141	TRUE	TRUE	FALSE	FALSE	FALSE	FALSE	CDC5
YDL132W	TRUE	0.0751327	0.0845706	0.102572	0.0183917	0.0469516	0.0220886	FALSE	FALSE	FALSE	FALSE	FALSE	FALSE	CDC53
YGL190C	TRUE	0.0868074	0.064861	0.0369314	0.00318169	0.0316981	0.0168372	FALSE	FALSE	FALSE	FALSE	FALSE	FALSE	CDC55
YJL194W	TRUE	0.024344	0.115467	0.142877	0.159591	0.0348992	0.0239407	FALSE	FALSE	FALSE	FALSE	FALSE	FALSE	CDC6
YDL017W	TRUE	0.107711	0.0739669	0.0506133	0.00903809	0.0113651	0.0392792	FALSE	FALSE	FALSE	FALSE	FALSE	FALSE	CDC7
YGL003C	TRUE	0.0534852	0.0587433	0.0532205	0.0083799	0.0475484	0.0150022	FALSE	FALSE	FALSE	FALSE	FALSE	FALSE	CDH1
YBR274W	TRUE	0.00411082	0.00596228	0.00331508	0.0176411	0.0260821	0.0173896	FALSE	FALSE	FALSE	FALSE	FALSE	FALSE	CHK1
YBR135W	TRUE	0.0211184	0.0244495	0.0678215	0.00640122	0.0240953	0.0176147	FALSE	FALSE	FALSE	FALSE	FALSE	FALSE	CKS1
YGR108W	TRUE	0.614896	0.478468	0.269542	0.0760737	0.153632	0.224572	TRUE	TRUE	TRUE	FALSE	FALSE	FALSE	CLB1
YPR119W	TRUE	0.548604	0.399577	0.20297	0.0948113	0.152987	0.209033	TRUE	TRUE	FALSE	FALSE	FALSE	FALSE	CLB2
YDL155W	TRUE	0.0361499	0.0481443	0.127457	0.0760079	0.0670522	0.0159543	FALSE	FALSE	FALSE	FALSE	FALSE	FALSE	CLB3
YLR210W	TRUE	0.105166	0.012791	0.125675	0.164093	0.0455695	0.0731926	FALSE	FALSE	FALSE	FALSE	FALSE	FALSE	CLB4
YPR120C	TRUE	0.317747	0.218358	0.14008	0.13804	0.131802	0.115367	TRUE	FALSE	FALSE	FALSE	FALSE	FALSE	CLB5
YGR109C	TRUE	0.561372	0.343806	0.222555	0.281113	0.271085	0.259135	TRUE	TRUE	FALSE	TRUE	TRUE	TRUE	CLB6
YMR199W	TRUE	0.281998	0.210768	0.21304	0.0574176	0.108882	0.0812055	TRUE	FALSE	FALSE	FALSE	FALSE	FALSE	CLN1
YPL256C	TRUE	0.412229	0.295	0.288929	0.147723	0.221841	0.227735	TRUE	TRUE	TRUE	FALSE	FALSE	FALSE	CLN2
YAL040C	TRUE	0.120071	0.185665	0.222793	0.0490077	0.00577184	0.0298016	FALSE	FALSE	FALSE	FALSE	FALSE	FALSE	CLN3
YBR112C	TRUE	0.032872	0.0693612	0.11808	0.100971	0.0399092	0.0236088	FALSE	FALSE	FALSE	FALSE	FALSE	FALSE	CYC8
YGR113W	TRUE	0.0416375	0.0186699	0.0934231	0.136967	0.0156277	0.0201982	FALSE	FALSE	FALSE	FALSE	FALSE	FALSE	DAM1
YGR092W	TRUE	0.191559	0.302978	0.391285	0.183365	0.087273	0.0621481	FALSE	TRUE	TRUE	FALSE	FALSE	FALSE	DBF2
YPR111W	TRUE	0.0924144	0.0201211	0.0205777	0.150503	0.0679311	0.113766	FALSE	FALSE	FALSE	FALSE	FALSE	FALSE	DBF20
YDR052C	TRUE	0.0404766	0.0185887	0.0787344	0.0124772	0.0355242	0.00296665	FALSE	FALSE	FALSE	FALSE	FALSE	FALSE	DBF4
YPL194W	TRUE	0.110417	0.060135	0.0929483	0.0102439	0.0159283	0.0124368	FALSE	FALSE	FALSE	FALSE	FALSE	FALSE	DDC1
YGL240W	TRUE	0.0581414	0.0262107	0.00843876	0.0477771	0.00928267	0.0366582	FALSE	FALSE	FALSE	FALSE	FALSE	FALSE	DOC1
YDL101C	TRUE	0.280278	0.208926	0.219428	0.0213916	0.0383077	0.0299372	TRUE	FALSE	FALSE	FALSE	FALSE	FALSE	DUN1
YGR098C	TRUE	0.0103159	0.0972943	0.185113	0.172789	0.0557914	0.0582651	FALSE	FALSE	FALSE	FALSE	FALSE	FALSE	ESP1
YJL157C	TRUE	0.228829	0.206751	0.285722	0.141574	0.0866449	0.0388672	FALSE	FALSE	TRUE	FALSE	FALSE	FALSE	FAR1
YDR110W	TRUE	0.0725124	0.0553879	0.0337996	0.0116485	0.0158562	0.00992653	FALSE	FALSE	FALSE	FALSE	FALSE	FALSE	FOB1
YBL016W	TRUE	0.126419	0.0962457	0.0746502	0.135142	0.183371	0.214093	FALSE	FALSE	FALSE	FALSE	FALSE	FALSE	FUS3
YDR507C	TRUE	0.305127	0.202337	0.16124	0.0989029	0.0676976	0.057714	TRUE	FALSE	FALSE	FALSE	FALSE	FALSE	GIN4
YJR090C	TRUE	0.0874087	0.0805204	0.0932099	0.042646	0.0525092	0.0360409	FALSE	FALSE	FALSE	FALSE	FALSE	FALSE	GRR1
YOL133W	TRUE	0.0821584	0.0745547	0.13045	0.0625188	0.0802338	0.0440974	FALSE	FALSE	FALSE	FALSE	FALSE	FALSE	HRT1
YKL101W	TRUE	0.274373	0.238865	0.217779	0.0565149	0.0936246	0.0996289	TRUE	FALSE	FALSE	FALSE	FALSE	FALSE	HSL1
YBR133C	TRUE	0.125965	0.0383879	0.0219319	0.0473621	0.00127665	0.0121237	FALSE	FALSE	FALSE	FALSE	FALSE	FALSE	HSL7
YIL026C	TRUE	0.346675	0.248573	0.212551	0.0883852	0.121093	0.0804891	TRUE	FALSE	FALSE	FALSE	FALSE	FALSE	IRR1
YCL024W	TRUE	0.447206	0.276727	0.200913	0.282517	0.264326	0.212385	TRUE	TRUE	FALSE	TRUE	TRUE	FALSE	KCC4
YGR040W	TRUE	0.127159	0.0925131	0.117413	0.099592	0.0945355	0.0840157	FALSE	FALSE	FALSE	FALSE	FALSE	FALSE	KSS1
YDR499W	TRUE	0.0897876	0.0654693	0.0685692	0.0114956	0.0553909	0.0297198	FALSE	FALSE	FALSE	FALSE	FALSE	FALSE	LCD1
YAL024C	TRUE	0.0572118	0.100408	0.155928	0.191498	0.0669666	0.0920836	FALSE	FALSE	FALSE	FALSE	FALSE	FALSE	LTE1
YGL086W	TRUE	0.0356442	0.0256789	0.0387521	0.011778	0.0111829	0.0353874	FALSE	FALSE	FALSE	FALSE	FALSE	FALSE	MAD1
YJL030W	TRUE	0.0619967	0.0369703	0.0514275	0.0297815	0.0359388	0.0313025	FALSE	FALSE	FALSE	FALSE	FALSE	FALSE	MAD2
YJL013C	TRUE	0.075657	0.0225098	0.0875781	0.123669	0.105657	0.111801	FALSE	FALSE	FALSE	FALSE	FALSE	FALSE	MAD3
YDL056W	TRUE	0.0427524	0.0259668	0.0559342	0.080699	0.0942031	0.0679128	FALSE	FALSE	FALSE	FALSE	FALSE	FALSE	MBP1
YDL003W	TRUE	0.479347	0.350519	0.316485	0.179482	0.167574	0.172706	TRUE	TRUE	TRUE	FALSE	FALSE	FALSE	MCD1
YMR043W	TRUE	0.131898	0.0968795	0.0812526	0.0361353	0.0411009	0.0133265	FALSE	FALSE	FALSE	FALSE	FALSE	FALSE	MCM1
YBL023C	TRUE	0.126769	0.036477	0.234747	0.224512	0.142858	0.0880449	FALSE	FALSE	FALSE	FALSE	FALSE	FALSE	MCM2
YEL032W	TRUE	0.153649	0.00882828	0.206142	0.218461	0.179789	0.121127	FALSE	FALSE	FALSE	FALSE	FALSE	FALSE	MCM3
YPR019W	TRUE	0.0543043	0.081736	0.259826	0.153665	0.136015	0.0727714	FALSE	FALSE	TRUE	FALSE	FALSE	FALSE	MCM4
YLR274W	TRUE	0.110157	0.0695282	0.273382	0.259925	0.193409	0.152444	FALSE	FALSE	TRUE	TRUE	FALSE	FALSE	MCM5
YGL201C	TRUE	0.0857544	0.0470758	0.202142	0.140398	0.0833528	0.0139518	FALSE	FALSE	FALSE	FALSE	FALSE	FALSE	MCM6
YBR202W	TRUE	0.0402555	0.135057	0.371974	0.179058	0.106048	0.040601	FALSE	FALSE	TRUE	FALSE	FALSE	FALSE	MCM7
YBR136W	TRUE	0.0275686	0.0326342	0.0218672	0.0700327	0.0186422	0.0267782	FALSE	FALSE	FALSE	FALSE	FALSE	FALSE	MEC1
YLR288C	TRUE	0.0438534	0.0277668	0.115797	0.110736	0.0748301	0.0386456	FALSE	FALSE	FALSE	FALSE	FALSE	FALSE	MEC3
YIL046W	TRUE	0.025539	0.0136837	0.109953	0.0398926	0.0217233	0.0540468	FALSE	FALSE	FALSE	FALSE	FALSE	FALSE	MET30
YMR036C	TRUE	0.0372938	0.00915391	0.0367554	0.00284228	0.0728516	0.0439487	FALSE	FALSE	FALSE	FALSE	FALSE	FALSE	MIH1
YIL106W	TRUE	0.324683	0.298412	0.297301	0.0422548	0.111911	0.154286	TRUE	TRUE	TRUE	FALSE	FALSE	FALSE	MOB1
YDL028C	TRUE	0.12659	0.0502737	0.0888476	0.141293	0.0838532	0.0851272	FALSE	FALSE	FALSE	FALSE	FALSE	FALSE	MPS1
YCL061C	TRUE	0.297507	0.218342	0.177695	0.145494	0.114259	0.124481	TRUE	FALSE	FALSE	FALSE	FALSE	FALSE	MRC1
YJL076W	TRUE	0.0381138	0.0297171	0.0154156	0.0433383	0.0452021	0.0501211	FALSE	FALSE	FALSE	FALSE	FALSE	FALSE	NET1
YML065W	TRUE	0.0467764	0.0115732	0.0723284	0.101971	0.0886084	0.0983393	FALSE	FALSE	FALSE	FALSE	FALSE	FALSE	ORC1
YBR060C	TRUE	0.0160741	0.0029874	0.0263051	0.00592784	0.020944	0.00435142	FALSE	FALSE	FALSE	FALSE	FALSE	FALSE	ORC2
YLL004W	TRUE	0.0394114	0.00282992	0.0958815	0.0694462	0.0574912	0.0693442	FALSE	FALSE	FALSE	FALSE	FALSE	FALSE	ORC3
YPR162C	TRUE	0.0403926	0.0842765	0.0282162	0.00219156	0.0546813	0.0409702	FALSE	FALSE	FALSE	FALSE	FALSE	FALSE	ORC4
YNL261W	TRUE	0.0268945	0.0268218	0.0520314	0.0779337	0.0436072	0.066922	FALSE	FALSE	FALSE	FALSE	FALSE	FALSE	ORC5
YHR118C	TRUE	0.0763888	0.0369354	0.0289191	0.0272815	0.00651632	0.00672819	FALSE	FALSE	FALSE	FALSE	FALSE	FALSE	ORC6
YNL289W	TRUE	0.422816	0.286562	0.318484	0.0546805	0.178625	0.211255	TRUE	TRUE	TRUE	FALSE	FALSE	FALSE	PCL1
YDL127W	TRUE	0.112636	0.0791045	0.0187831	0.141979	0.148208	0.138853	FALSE	FALSE	FALSE	FALSE	FALSE	FALSE	PCL2
YDL179W	TRUE	0.281172	0.296081	0.506704	0.598614	0.4457	0.384957	TRUE	TRUE	TRUE	TRUE	TRUE	TRUE	PCL9
YDR113C	TRUE	0.210942	0.241354	0.347905	0.126728	0.0227527	0.0691262	FALSE	FALSE	TRUE	FALSE	FALSE	FALSE	PDS1
YAR071W	TRUE	0.182776	0.114821	0.11074	0.0746435	0.111304	0.0694259	FALSE	FALSE	FALSE	FALSE	FALSE	FALSE	PHO11
YHR215W	TRUE	0.243208	0.131749	0.153061	0.134391	0.135897	0.0856146	FALSE	FALSE	FALSE	FALSE	FALSE	FALSE	PHO12
YDL106C	TRUE	0.00717786	0.00545296	0.0159207	0.035058	0.0175541	0.0239532	FALSE	FALSE	FALSE	FALSE	FALSE	FALSE	PHO2
YFR034C	TRUE	0.00657683	0.0023498	0.0411657	0.0692476	0.146085	0.139013	FALSE	FALSE	FALSE	FALSE	FALSE	FALSE	PHO4
YBR093C	TRUE	0.281217	0.275132	0.371644	0.153839	0.155966	0.0964056	TRUE	TRUE	TRUE	FALSE	FALSE	FALSE	PHO5
YOL001W	TRUE	0.00906753	0.0334954	0.0425437	0.0309613	0.00927696	0.0218465	FALSE	FALSE	FALSE	FALSE	FALSE	FALSE	PHO80
YGR233C	TRUE	0.102679	0.0664674	0.0428191	0.0341272	0.0215295	0.00154686	FALSE	FALSE	FALSE	FALSE	FALSE	FALSE	PHO81
YPL031C	TRUE	0.0643845	0.0574457	0.0587922	0.0180372	0.00275767	0.018258	FALSE	FALSE	FALSE	FALSE	FALSE	FALSE	PHO85
YDL134C	TRUE	0.0289462	0.0422256	0.0587352	0.00140348	0.0102541	0.00599016	FALSE	FALSE	FALSE	FALSE	FALSE	FALSE	PPH21
YDL188C	TRUE	0.0640224	0.0728304	0.0828906	0.0796303	0.054601	0.0566082	FALSE	FALSE	FALSE	FALSE	FALSE	FALSE	PPH22
YOR368W	TRUE	0.0989086	0.0711148	0.0981378	0.00986708	0.00100048	0.0152169	FALSE	FALSE	FALSE	FALSE	FALSE	FALSE	RAD17
YER173W	TRUE	0.0363859	0.0466152	0.0141568	0.0543748	0.0319683	0.0227541	FALSE	FALSE	FALSE	FALSE	FALSE	FALSE	RAD24
YPL153C	TRUE	0.369875	0.252709	0.247012	0.134855	0.167936	0.128836	TRUE	TRUE	FALSE	FALSE	FALSE	FALSE	RAD53
YDR217C	TRUE	0.0479709	0.0473748	0.0135139	0.0145741	0.0211926	0.00503917	FALSE	FALSE	FALSE	FALSE	FALSE	FALSE	RAD9
YLR176C	TRUE	0.0678488	0.082729	0.0944543	0.0428793	0.0146461	0.0276173	FALSE	FALSE	FALSE	FALSE	FALSE	FALSE	RFX1
YDR180W	TRUE	0.196373	0.0850724	0.0231589	0.0719616	0.0457074	0.0187575	FALSE	FALSE	FALSE	FALSE	FALSE	FALSE	SCC2
YER147C	TRUE	0.0625092	0.0523385	0.0474631	0.0358712	0.00708285	0.0269444	FALSE	FALSE	FALSE	FALSE	FALSE	FALSE	SCC4
YLR079W	TRUE	0.155705	0.204425	0.284614	0.400181	0.291345	0.249742	FALSE	FALSE	TRUE	TRUE	TRUE	FALSE	SIC1
YDR328C	TRUE	0.0218984	0.00258065	0.0270036	0.083659	0.0473424	0.0679084	FALSE	FALSE	FALSE	FALSE	FALSE	FALSE	SKP1
YOR195W	TRUE	0.205721	0.188522	0.238508	0.0484618	0.0360013	0.0043813	FALSE	FALSE	FALSE	FALSE	FALSE	FALSE	SLK19
YFL008W	TRUE	0.251406	0.166169	0.126461	0.0937005	0.0793664	0.0573924	TRUE	FALSE	FALSE	FALSE	FALSE	FALSE	SMC1
YFR031C	TRUE	0.0790456	0.0527791	0.0502089	0.0276168	0.0396213	0.089718	FALSE	FALSE	FALSE	FALSE	FALSE	FALSE	SMC2
YJL074C	TRUE	0.366755	0.26709	0.183592	0.155616	0.160264	0.130225	TRUE	TRUE	FALSE	FALSE	FALSE	FALSE	SMC3
YLR086W	TRUE	0.053498	0.0187318	0.0847986	0.0904373	0.0989314	0.0540479	FALSE	FALSE	FALSE	FALSE	FALSE	FALSE	SMC4
YHR152W	TRUE	0.103092	0.153425	0.366503	0.158197	0.0819928	0.0293964	FALSE	FALSE	TRUE	FALSE	FALSE	FALSE	SPO12
YJL187C	TRUE	0.214361	0.197004	0.183095	0.0572026	0.0499267	0.0833713	FALSE	FALSE	FALSE	FALSE	FALSE	FALSE	SWE1
YER111C	TRUE	0.326761	0.158416	0.0299647	0.260162	0.206875	0.150334	TRUE	FALSE	FALSE	TRUE	FALSE	FALSE	SWI4
YDR146C	TRUE	0.894023	0.535687	0.381188	0.0124567	0.0346878	0.201209	TRUE	TRUE	TRUE	FALSE	FALSE	FALSE	SWI5
YLR182W	TRUE	0.0175291	0.0138976	0.0844769	0.0836332	0.0125199	0.04124	FALSE	FALSE	FALSE	FALSE	FALSE	FALSE	SWI6
YDR260C	TRUE	0.00894409	0.0533206	0.0567872	0.0332048	0.048107	0.0351697	FALSE	FALSE	FALSE	FALSE	FALSE	FALSE	SWM1
YJR046W	TRUE	0.00477858	0.0173004	0.0294688	0.0181171	0.0109917	0.00714205	FALSE	FALSE	FALSE	FALSE	FALSE	FALSE	TAH11
YML064C	TRUE	0.134703	0.0733678	0.0243602	0.081736	0.038623	0.049793	FALSE	FALSE	FALSE	FALSE	FALSE	FALSE	TEM1
YAL016W	TRUE	0.0120846	0.018011	0.0307774	0.00512464	0.0255265	0.0163183	FALSE	FALSE	FALSE	FALSE	FALSE	FALSE	TPD3
YCR084C	TRUE	0.0334744	0.0566368	0.116021	0.078652	0.0827708	0.0557653	FALSE	FALSE	FALSE	FALSE	FALSE	FALSE	TUP1
YOR083W	TRUE	0.0906736	0.0882098	0.190466	0.0185096	0.269675	0.15552	FALSE	FALSE	FALSE	FALSE	TRUE	FALSE	WHI5
YDR325W	TRUE	0.0246094	0.0290754	0.097555	0.166138	0.129764	0.0969311	FALSE	FALSE	FALSE	FALSE	FALSE	FALSE	YCG1
YLR272C	TRUE	0.0665419	0.12453	0.158536	0.135537	0.0683551	0.0358977	FALSE	FALSE	FALSE	FALSE	FALSE	FALSE	YCS4
YDR451C	TRUE	0.130928	0.0114995	0.0757754	0.088155	0.0763303	0.0539022	FALSE	FALSE	FALSE	FALSE	FALSE	FALSE	YHP1
YML027W	TRUE	0.47681	0.29392	0.268538	0.131761	0.0939915	0.0855304	TRUE	TRUE	TRUE	FALSE	FALSE	FALSE	YOX1

## Sheet: b. intra-layer edge table Sc.CC
source	target	Weight	edge type
YAL016W	YAL024C	0.297317	PPI
YAL016W	YDL134C	0.378551	PPI
YAL016W	YDL188C	0.374091	PPI
YAL016W	YFR028C	0.240334	PPI
YAL016W	YGL190C	0.37959	PPI
YAL016W	YPL256C	0.239343	PPI
YAL024C	YBL097W	0.292451	PPI
YAL024C	YBR160W	0.309516	PPI
YAL024C	YFR028C	0.297283	PPI
YAL024C	YIL046W	0.228667	PPI
YAL024C	YML064C	0.229153	PPI
YAL024C	YPR119W	0.239343	PPI
YAL040C	YBR160W	0.380364	PPI
YAL040C	YDL132W	0.239343	PPI
YAL040C	YFL009W	0.320188	PPI
YAL040C	YJL013C	0.300072	PPI
YAL040C	YJL157C	0.32504	PPI
YAL040C	YJR090C	0.239343	PPI
YAL040C	YLR182W	0.257628	PPI
YAL040C	YOL001W	0.229153	PPI
YAL040C	YPL031C	0.297283	PPI
YAR019C	YDL028C	0.250513	PPI
YAR019C	YDL101C	0.250513	PPI
YAR019C	YFR028C	0.327401	PPI
YAR019C	YGR092W	0.280408	PPI
YAR019C	YIL106W	0.250513	PPI
YAR019C	YML064C	0.372787	PPI
YAR019C	YMR001C	0.250513	PPI
YAR071W	YBR093C	0.24666	PPI
YBL016W	YBL023C	0.250513	PPI
YBL016W	YEL032W	0.250513	PPI
YBL016W	YFR028C	0.267785	PPI
YBL016W	YGR040W	0.228667	PPI
YBL016W	YJL076W	0.244453	PPI
YBL016W	YJL157C	0.333205	PPI
YBL023C	YBR060C	0.314605	PPI
YBL023C	YBR202W	0.343975	PPI
YBL023C	YCL061C	0.343086	PPI
YBL023C	YDL017W	0.381167	PPI
YBL023C	YDL056W	0.222702	PPI
YBL023C	YDR052C	0.368843	PPI
YBL023C	YEL032W	0.378519	PPI
YBL023C	YER111C	0.203298	PPI
YBL023C	YGL201C	0.378244	PPI
YBL023C	YGR040W	0.250513	PPI
YBL023C	YHR118C	0.303129	PPI
YBL023C	YJL194W	0.361086	PPI
YBL023C	YJR046W	0.377019	PPI
YBL023C	YLL004W	0.301211	PPI
YBL023C	YLR103C	0.382673	PPI
YBL023C	YLR182W	0.222702	PPI
YBL023C	YLR274W	0.375845	PPI
YBL023C	YML065W	0.316608	PPI
YBL023C	YNL261W	0.334949	PPI
YBL023C	YPL031C	0.250513	PPI
YBL023C	YPR019W	0.382291	PPI
YBL023C	YPR120C	0.267785	PPI
YBL023C	YPR162C	0.284449	PPI
YBL084C	YBR135W	0.239343	PPI
YBL084C	YBR160W	0.3012	PPI
YBL084C	YDL008W	0.3356	PPI
YBL084C	YDL134C	0.250513	PPI
YBL084C	YDL188C	0.250513	PPI
YBL084C	YDR118W	0.36746	PPI
YBL084C	YDR260C	0.354311	PPI
YBL084C	YFR036W	0.343501	PPI
YBL084C	YGL003C	0.338154	PPI
YBL084C	YGL116W	0.239343	PPI
YBL084C	YGL240W	0.365752	PPI
YBL084C	YHR166C	0.375064	PPI
YBL084C	YKL022C	0.382932	PPI
YBL084C	YLR102C	0.320909	PPI
YBL084C	YLR127C	0.376208	PPI
YBL084C	YMR001C	0.250513	PPI
YBL084C	YNL172W	0.366706	PPI
YBL084C	YOR249C	0.350962	PPI
YBL084C	YPL031C	0.250513	PPI
YBL097W	YDR325W	0.305455	PPI
YBL097W	YFR031C	0.328286	PPI
YBL097W	YLR086W	0.328286	PPI
YBL097W	YLR272C	0.310537	PPI
YBR060C	YBR160W	0.313026	PPI
YBR060C	YBR202W	0.250513	PPI
YBR060C	YDL017W	0.240334	PPI
YBR060C	YDR052C	0.316108	PPI
YBR060C	YEL032W	0.250513	PPI
YBR060C	YFR028C	0.261739	PPI
YBR060C	YGL086W	0.246901	PPI
YBR060C	YHR118C	0.362367	PPI
YBR060C	YJL194W	0.370552	PPI
YBR060C	YJR046W	0.264268	PPI
YBR060C	YLL004W	0.363842	PPI
YBR060C	YLR274W	0.250513	PPI
YBR060C	YML065W	0.377068	PPI
YBR060C	YMR036C	0.140971	PPI
YBR060C	YNL261W	0.37922	PPI
YBR060C	YPR120C	0.228686	PPI
YBR060C	YPR162C	0.374488	PPI
YBR112C	YCR084C	0.383486	PPI
YBR112C	YFR034C	0.239848	PPI
YBR112C	YLR176C	0.295466	PPI
YBR133C	YJL187C	0.377327	PPI
YBR133C	YKL101W	0.347258	PPI
YBR133C	YPL031C	0.250513	PPI
YBR135W	YBR160W	0.382228	PPI
YBR135W	YDL155W	0.37523	PPI
YBR135W	YGR108W	0.336963	PPI
YBR135W	YGR109C	0.267785	PPI
YBR135W	YHR166C	0.239343	PPI
YBR135W	YJL187C	0.309296	PPI
YBR135W	YJL194W	0.297283	PPI
YBR135W	YKL022C	0.239343	PPI
YBR135W	YLR079W	0.351114	PPI
YBR135W	YLR210W	0.303116	PPI
YBR135W	YMR199W	0.350962	PPI
YBR135W	YPL256C	0.366706	PPI
YBR135W	YPR119W	0.370958	PPI
YBR135W	YPR120C	0.3468	PPI
YBR136W	YCL061C	0.239848	PPI
YBR136W	YDL101C	0.250513	PPI
YBR136W	YDR217C	0.284627	PPI
YBR136W	YDR499W	0.382918	PPI
YBR136W	YPL153C	0.379151	PPI
YBR160W	YCL061C	0.239343	PPI
YBR160W	YDL017W	0.250513	PPI
YBR160W	YDL056W	0.240334	PPI
YBR160W	YDL106C	0.286721	PPI
YBR160W	YDL155W	0.381702	PPI
YBR160W	YDR052C	0.284627	PPI
YBR160W	YDR113C	0.351803	PPI
YBR160W	YDR146C	0.353143	PPI
YBR160W	YDR217C	0.280669	PPI
YBR160W	YDR451C	0.327401	PPI
YBR160W	YDR507C	0.320909	PPI
YBR160W	YEL032W	0.341555	PPI
YBR160W	YER111C	0.295112	PPI
YBR160W	YFL029C	0.378012	PPI
YBR160W	YFR028C	0.297121	PPI
YBR160W	YFR034C	0.240334	PPI
YBR160W	YGL003C	0.377978	PPI
YBR160W	YGL190C	0.297283	PPI
YBR160W	YGR098C	0.239848	PPI
YBR160W	YGR108W	0.339018	PPI
YBR160W	YGR109C	0.328789	PPI
YBR160W	YGR188C	0.250513	PPI
YBR160W	YHR118C	0.190642	PPI
YBR160W	YHR152W	0.239848	PPI
YBR160W	YHR166C	0.3012	PPI
YBR160W	YIL106W	0.297283	PPI
YBR160W	YJL013C	0.240334	PPI
YBR160W	YJL076W	0.311795	PPI
YBR160W	YJL157C	0.362623	PPI
YBR160W	YJL187C	0.378638	PPI
YBR160W	YJL194W	0.379955	PPI
YBR160W	YJR053W	0.239848	PPI
YBR160W	YJR090C	0.311617	PPI
YBR160W	YKL022C	0.3012	PPI
YBR160W	YLR079W	0.382803	PPI
YBR160W	YLR086W	0.325474	PPI
YBR160W	YLR102C	0.3012	PPI
YBR160W	YLR127C	0.239343	PPI
YBR160W	YLR182W	0.355819	PPI
YBR160W	YLR210W	0.351271	PPI
YBR160W	YML027W	0.342902	PPI
YBR160W	YML065W	0.323119	PPI
YBR160W	YMR001C	0.320909	PPI
YBR160W	YMR036C	0.325474	PPI
YBR160W	YMR199W	0.380123	PPI
YBR160W	YNL172W	0.239848	PPI
YBR160W	YOR083W	0.371429	PPI
YBR160W	YOR249C	0.239848	PPI
YBR160W	YOR368W	0.229153	PPI
YBR160W	YPL153C	0.250513	PPI
YBR160W	YPL194W	0.284627	PPI
YBR160W	YPL256C	0.38425	PPI
YBR160W	YPR119W	0.384297	PPI
YBR160W	YPR120C	0.381963	PPI
YBR202W	YCL061C	0.239343	PPI
YBR202W	YDL017W	0.297121	PPI
YBR202W	YDR052C	0.250513	PPI
YBR202W	YEL032W	0.379272	PPI
YBR202W	YGL201C	0.338721	PPI
YBR202W	YJL194W	0.3012	PPI
YBR202W	YJR046W	0.333641	PPI
YBR202W	YLR103C	0.378351	PPI
YBR202W	YLR274W	0.372471	PPI
YBR202W	YML065W	0.3012	PPI
YBR202W	YMR043W	0.489848	PPI+PDI
YBR202W	YPR019W	0.380606	PPI
YBR274W	YDR113C	0.325893	PPI
YBR274W	YDR217C	0.321753	PPI
YBR274W	YFR028C	0.267785	PPI
YBR274W	YJL076W	0.244453	PPI
YCL024W	YFR028C	0.267785	PPI
YCL024W	YJL187C	0.263707	PPI
YCL024W	YKL101W	0.240334	PPI
YCL024W	YNL289W	0.239848	PPI
YCL024W	YPL031C	0.297121	PPI
YCL061C	YEL032W	0.343086	PPI
YCL061C	YER173W	0.229153	PPI
YCL061C	YGL201C	0.29215	PPI
YCL061C	YLR103C	0.33817	PPI
YCL061C	YLR274W	0.28541	PPI
YCL061C	YPL031C	0.250513	PPI
YCL061C	YPL153C	0.279712	PPI
YCL061C	YPR019W	0.363041	PPI
YCR084C	YGR098C	0.229153	PPI
YCR084C	YIL046W	0.228667	PPI
YCR084C	YLR176C	0.295466	PPI
YDL003W	YDL134C	0.250513	PPI
YDL003W	YDL188C	0.228686	PPI
YDL003W	YDR180W	0.361493	PPI
YDL003W	YER147C	0.281528	PPI
YDL003W	YFL008W	0.383337	PPI
YDL003W	YGR098C	0.297283	PPI
YDL003W	YIL026C	0.381466	PPI
YDL003W	YJL074C	0.384498	PPI
YDL003W	YMR001C	0.359579	PPI
YDL003W	YOR195W	0.229153	PPI
YDL008W	YDR118W	0.333605	PPI
YDL008W	YDR260C	0.313894	PPI
YDL008W	YFR036W	0.256385	PPI
YDL008W	YGL240W	0.276971	PPI
YDL008W	YHR166C	0.310537	PPI
YDL008W	YKL022C	0.37941	PPI
YDL008W	YLR102C	0.26518	PPI
YDL008W	YLR127C	0.365393	PPI
YDL008W	YMR001C	0.267785	PPI
YDL008W	YNL172W	0.310537	PPI
YDL008W	YOR249C	0.26518	PPI
YDL017W	YDL132W	0.29755	PPI
YDL017W	YDR052C	0.383857	PPI
YDL017W	YEL032W	0.325474	PPI
YDL017W	YGL201C	0.364699	PPI
YDL017W	YLL004W	0.229153	PPI
YDL017W	YLR274W	0.312399	PPI
YDL017W	YMR001C	0.331071	PPI
YDL017W	YPL153C	0.335857	PPI
YDL017W	YPR019W	0.376362	PPI
YDL028C	YGL003C	0.239343	PPI
YDL028C	YGL086W	0.250513	PPI
YDL028C	YGR113W	0.169642	PPI
YDL028C	YGR188C	0.250513	PPI
YDL028C	YIL106W	0.324289	PPI
YDL028C	YJR053W	0.267785	PPI
YDL028C	YMR001C	0.239343	PPI
YDL056W	YER111C	0.489343	PPI+PDI
YDL056W	YFR028C	0.222702	PPI
YDL056W	YJL076W	0.203298	PPI
YDL056W	YLR182W	0.377009	PPI
YDL056W	YMR043W	0.222702	PPI
YDL056W	YPL153C	0.239343	PPI
YDL101C	YDR217C	0.267785	PPI
YDL101C	YER173W	0.256385	PPI
YDL101C	YFR028C	0.267785	PPI
YDL101C	YJL076W	0.244453	PPI
YDL101C	YPL153C	0.375246	PPI
YDL106C	YDR146C	0.360171	PPI
YDL106C	YFR034C	0.361949	PPI
YDL106C	YOL133W	0.218932	PPI
YDL127W	YDR146C	0.556407	PPI+PDI
YDL127W	YFR034C	0.250513	PPI
YDL127W	YPL031C	0.357202	PPI
YDL132W	YDL155W	0.239343	PPI
YDL132W	YDR328C	0.384385	PPI
YDL132W	YFL009W	0.380348	PPI
YDL132W	YFR028C	0.239343	PPI
YDL132W	YIL046W	0.378258	PPI
YDL132W	YJR090C	0.378941	PPI
YDL132W	YLR079W	0.309354	PPI
YDL132W	YLR103C	0.222702	PPI
YDL132W	YMR199W	0.239343	PPI
YDL132W	YOL133W	0.381741	PPI
YDL132W	YPL256C	0.300592	PPI
YDL134C	YDL188C	0.267785	PPI
YDL134C	YGL190C	0.381826	PPI
YDL134C	YJL187C	0.268037	PPI
YDL134C	YKL022C	0.250513	PPI
YDL134C	YLR079W	0.239848	PPI
YDL134C	YLR102C	0.250513	PPI
YDL134C	YMR036C	0.250513	PPI
YDL134C	YNL172W	0.250513	PPI
YDL134C	YPL256C	0.239343	PPI
YDL155W	YDR146C	0.239343	PPI
YDL155W	YDR507C	0.267785	PPI
YDL155W	YFL009W	0.239343	PPI
YDL155W	YFR028C	0.267785	PPI
YDL155W	YGL003C	0.32504	PPI
YDL155W	YGR092W	0.305455	PPI
YDL155W	YIL106W	0.229153	PPI
YDL155W	YJL076W	0.244453	PPI
YDL155W	YLR079W	0.367858	PPI
YDL155W	YMR036C	0.267785	PPI
YDL179W	YPL031C	0.352894	PPI
YDL188C	YGL190C	0.380074	PPI
YDL188C	YGR098C	0.228686	PPI
YDL188C	YJL187C	0.268037	PPI
YDL188C	YKL022C	0.228686	PPI
YDL188C	YLR102C	0.228686	PPI
YDL188C	YMR036C	0.228686	PPI
YDL188C	YNL172W	0.228686	PPI
YDR052C	YEL032W	0.250513	PPI
YDR052C	YGL116W	0.239848	PPI
YDR052C	YGL201C	0.312399	PPI
YDR052C	YHR118C	0.230102	PPI
YDR052C	YLL004W	0.29675	PPI
YDR052C	YLR274W	0.250513	PPI
YDR052C	YMR001C	0.355506	PPI
YDR052C	YNL261W	0.264268	PPI
YDR052C	YPL153C	0.363498	PPI
YDR052C	YPR019W	0.250513	PPI
YDR110W	YER111C	0.203298	PPI
YDR110W	YFR028C	0.307797	PPI
YDR110W	YHR152W	0.296504	PPI
YDR110W	YJL076W	0.357468	PPI
YDR110W	YLR182W	0.203298	PPI
YDR110W	YML065W	0.229153	PPI
YDR113C	YGL003C	0.37872	PPI
YDR113C	YGL116W	0.380352	PPI
YDR113C	YGR098C	0.361508	PPI
YDR113C	YPL031C	0.250513	PPI
YDR118W	YDR260C	0.332035	PPI
YDR118W	YFR036W	0.319131	PPI
YDR118W	YGL240W	0.352424	PPI
YDR118W	YHR166C	0.373383	PPI
YDR118W	YKL022C	0.381688	PPI
YDR118W	YLR102C	0.343895	PPI
YDR118W	YLR127C	0.351155	PPI
YDR118W	YMR001C	0.256385	PPI
YDR118W	YNL172W	0.342962	PPI
YDR118W	YOR249C	0.360051	PPI
YDR146C	YFL009W	0.300072	PPI
YDR146C	YFR028C	0.297283	PPI
YDR146C	YOL001W	0.239343	PPI
YDR146C	YPL031C	0.250513	PPI
YDR180W	YER147C	0.361695	PPI
YDR180W	YFL008W	0.323119	PPI
YDR180W	YIL026C	0.354347	PPI
YDR180W	YJL074C	0.340029	PPI
YDR217C	YFR028C	0.229153	PPI
YDR217C	YMR001C	0.256385	PPI
YDR217C	YOR368W	0.239848	PPI
YDR217C	YPL153C	0.384461	PPI
YDR217C	YPR119W	0.239848	PPI
YDR260C	YFR036W	0.326746	PPI
YDR260C	YGL240W	0.306557	PPI
YDR260C	YHR166C	0.372715	PPI
YDR260C	YKL022C	0.377064	PPI
YDR260C	YLR102C	0.329925	PPI
YDR260C	YLR127C	0.329925	PPI
YDR260C	YNL172W	0.339227	PPI
YDR260C	YOR249C	0.340764	PPI
YDR325W	YFR031C	0.345298	PPI
YDR325W	YJL074C	0.239343	PPI
YDR325W	YLR086W	0.345298	PPI
YDR325W	YLR272C	0.345298	PPI
YDR328C	YFL009W	0.384624	PPI
YDR328C	YGR188C	0.280408	PPI
YDR328C	YIL046W	0.382507	PPI
YDR328C	YJL187C	0.250513	PPI
YDR328C	YJR053W	0.230102	PPI
YDR328C	YJR090C	0.383902	PPI
YDR328C	YLR079W	0.342641	PPI
YDR328C	YLR103C	0.213221	PPI
YDR328C	YMR199W	0.257628	PPI
YDR328C	YOL133W	0.363268	PPI
YDR328C	YPL256C	0.32504	PPI
YDR328C	YPR019W	0.222702	PPI
YDR451C	YFR028C	0.222702	PPI
YDR451C	YGL003C	0.263445	PPI
YDR451C	YJL076W	0.203298	PPI
YDR451C	YMR043W	0.239343	PPI
YDR499W	YOL133W	0.218932	PPI
YDR507C	YFR028C	0.239343	PPI
YDR507C	YKL101W	0.306986	PPI
YDR507C	YPL153C	0.239343	PPI
YEL032W	YER111C	0.203298	PPI
YEL032W	YFR028C	0.280408	PPI
YEL032W	YGL003C	0.239343	PPI
YEL032W	YGL201C	0.364565	PPI
YEL032W	YJL194W	0.297283	PPI
YEL032W	YJR046W	0.366231	PPI
YEL032W	YLR103C	0.379473	PPI
YEL032W	YLR274W	0.381936	PPI
YEL032W	YML065W	0.250513	PPI
YEL032W	YNL172W	0.230102	PPI
YEL032W	YPR019W	0.379548	PPI
YEL032W	YPR119W	0.250513	PPI
YER111C	YFR028C	0.203298	PPI
YER111C	YGL201C	0.203298	PPI
YER111C	YJL076W	0.203298	PPI
YER111C	YLR182W	0.381781	PPI
YER111C	YLR274W	0.203298	PPI
YER111C	YMR043W	0.472702	PPI+PDI
YER111C	YOR083W	0.365062	PPI
YER111C	YPL153C	0.278841	PPI
YER111C	YPR119W	0.529115	PPI+PDI
YER147C	YFL008W	0.29215	PPI
YER147C	YJL074C	0.257628	PPI
YER173W	YLR288C	0.229153	PPI
YER173W	YPL194W	0.254054	PPI
YFL008W	YFR031C	0.254054	PPI
YFL008W	YGL086W	0.254054	PPI
YFL008W	YIL026C	0.34919	PPI
YFL008W	YJL074C	0.383451	PPI
YFL008W	YLR086W	0.239343	PPI
YFL008W	YMR001C	0.337439	PPI
YFL009W	YJL013C	0.239343	PPI
YFL009W	YJL157C	0.284627	PPI
YFL009W	YJL194W	0.371494	PPI
YFL009W	YLR079W	0.367684	PPI
YFL009W	YMR199W	0.239343	PPI
YFL009W	YNL289W	0.229153	PPI
YFL009W	YOL133W	0.375006	PPI
YFL009W	YOR083W	0.239848	PPI
YFL009W	YPL256C	0.29215	PPI
YFR028C	YGL003C	0.334987	PPI
YFR028C	YGL086W	0.280408	PPI
YFR028C	YGR040W	0.257628	PPI
YFR028C	YGR092W	0.332096	PPI
YFR028C	YHR118C	0.177614	PPI
YFR028C	YIL106W	0.239848	PPI
YFR028C	YJL076W	0.383984	PPI
YFR028C	YJL187C	0.305455	PPI
YFR028C	YJL194W	0.314669	PPI
YFR028C	YJR053W	0.335301	PPI
YFR028C	YKL101W	0.239343	PPI
YFR028C	YLR079W	0.334353	PPI
YFR028C	YLR086W	0.250513	PPI
YFR028C	YLR182W	0.3167	PPI
YFR028C	YLR274W	0.222702	PPI
YFR028C	YML027W	0.222702	PPI
YFR028C	YML064C	0.286721	PPI
YFR028C	YML065W	0.239343	PPI
YFR028C	YMR001C	0.336807	PPI
YFR028C	YMR043W	0.213221	PPI
YFR028C	YMR055C	0.316577	PPI
YFR031C	YJL074C	0.300072	PPI
YFR031C	YLR086W	0.360943	PPI
YFR031C	YLR272C	0.305755	PPI
YFR031C	YOR195W	0.254054	PPI
YFR034C	YGR233C	0.480102	PPI+PDI
YFR034C	YNL289W	0.239343	PPI
YFR034C	YOL001W	0.366749	PPI
YFR034C	YPL031C	0.380427	PPI
YFR036W	YGL116W	0.229153	PPI
YFR036W	YGL240W	0.281528	PPI
YFR036W	YHR166C	0.354451	PPI
YFR036W	YKL022C	0.378054	PPI
YFR036W	YLR102C	0.213221	PPI
YFR036W	YLR127C	0.292451	PPI
YFR036W	YMR001C	0.256385	PPI
YFR036W	YNL172W	0.310939	PPI
YFR036W	YOR249C	0.256385	PPI
YFR036W	YPL031C	0.239848	PPI
YGL003C	YGL116W	0.297283	PPI
YGL003C	YGL201C	0.239343	PPI
YGL003C	YGL240W	0.282799	PPI
YGL003C	YHR166C	0.353062	PPI
YGL003C	YKL022C	0.35541	PPI
YGL003C	YKL101W	0.381523	PPI
YGL003C	YMR001C	0.317204	PPI
YGL003C	YNL172W	0.297283	PPI
YGL003C	YPL256C	0.29215	PPI
YGL003C	YPR119W	0.378155	PPI
YGL003C	YPR120C	0.325474	PPI
YGL086W	YGL116W	0.294973	PPI
YGL086W	YGR113W	0.229153	PPI
YGL086W	YGR188C	0.336765	PPI
YGL086W	YJL030W	0.371772	PPI
YGL086W	YOR026W	0.3356	PPI
YGL116W	YGR188C	0.29755	PPI
YGL116W	YHR166C	0.320909	PPI
YGL116W	YJL013C	0.37921	PPI
YGL116W	YJL030W	0.38077	PPI
YGL116W	YKL022C	0.341587	PPI
YGL116W	YKL101W	0.35659	PPI
YGL116W	YOR026W	0.305455	PPI
YGL116W	YPR119W	0.327928	PPI
YGL116W	YPR120C	0.3012	PPI
YGL190C	YGR098C	0.287795	PPI
YGL190C	YIL106W	0.239343	PPI
YGL190C	YJL076W	0.304613	PPI
YGL190C	YJL194W	0.229153	PPI
YGL190C	YJR053W	0.229153	PPI
YGL190C	YPL256C	0.229153	PPI
YGL201C	YJR046W	0.375504	PPI
YGL201C	YLR103C	0.37886	PPI
YGL201C	YLR274W	0.36777	PPI
YGL201C	YML065W	0.250513	PPI
YGL201C	YMR043W	0.222702	PPI
YGL201C	YPR019W	0.381303	PPI
YGL240W	YHR166C	0.37013	PPI
YGL240W	YKL022C	0.382113	PPI
YGL240W	YLR102C	0.280669	PPI
YGL240W	YLR127C	0.374408	PPI
YGL240W	YNL172W	0.366424	PPI
YGL240W	YOR249C	0.31431	PPI
YGL240W	YPR119W	0.250513	PPI
YGR092W	YIL106W	0.379783	PPI
YGR092W	YJL076W	0.30316	PPI
YGR092W	YPR119W	0.239343	PPI
YGR098C	YMR001C	0.24666	PPI
YGR098C	YOR195W	0.300592	PPI
YGR098C	YPR019W	0.229153	PPI
YGR108W	YLR079W	0.312847	PPI
YGR108W	YPR119W	0.239343	PPI
YGR109C	YJL157C	0.267785	PPI
YGR109C	YLR079W	0.312847	PPI
YGR109C	YOR368W	0.256385	PPI
YGR109C	YPL031C	0.250513	PPI
YGR109C	YPL153C	0.239848	PPI
YGR109C	YPL256C	0.267785	PPI
YGR113W	YGR188C	0.218489	PPI
YGR113W	YJL013C	0.239343	PPI
YGR188C	YJL013C	0.239343	PPI
YGR188C	YJL030W	0.297283	PPI
YGR188C	YOR026W	0.381686	PPI
YGR233C	YOL001W	0.380054	PPI
YGR233C	YPL031C	0.381187	PPI
YHR118C	YJL194W	0.325474	PPI
YHR118C	YJR046W	0.34954	PPI
YHR118C	YLL004W	0.35897	PPI
YHR118C	YML065W	0.378155	PPI
YHR118C	YMR036C	0.140971	PPI
YHR118C	YNL261W	0.351613	PPI
YHR118C	YPR119W	0.255976	PPI
YHR118C	YPR120C	0.303309	PPI
YHR118C	YPR162C	0.330597	PPI
YHR152W	YNL172W	0.230102	PPI
YHR166C	YIL046W	0.228667	PPI
YHR166C	YKL022C	0.382509	PPI
YHR166C	YLR102C	0.276971	PPI
YHR166C	YLR127C	0.377174	PPI
YHR166C	YNL172W	0.345156	PPI
YHR166C	YOR249C	0.349701	PPI
YHR166C	YPR119W	0.286721	PPI
YIL026C	YJL074C	0.371659	PPI
YIL026C	YMR001C	0.314218	PPI
YIL046W	YJL187C	0.257628	PPI
YIL046W	YOL133W	0.32504	PPI
YIL106W	YKL101W	0.240334	PPI
YIL106W	YPR111W	0.357823	PPI
YJL013C	YJL030W	0.32504	PPI
YJL013C	YNL172W	0.240334	PPI
YJL013C	YOR026W	0.378079	PPI
YJL030W	YKL022C	0.204235	PPI
YJL030W	YOR026W	0.305455	PPI
YJL074C	YLR086W	0.300072	PPI
YJL074C	YMR001C	0.349705	PPI
YJL074C	YPL153C	0.267785	PPI
YJL076W	YLR182W	0.203298	PPI
YJL076W	YLR274W	0.203298	PPI
YJL076W	YML027W	0.203298	PPI
YJL076W	YPL153C	0.218489	PPI
YJL076W	YPR119W	0.271381	PPI
YJL157C	YMR199W	0.327852	PPI
YJL157C	YPL256C	0.368086	PPI
YJL157C	YPR119W	0.239343	PPI
YJL157C	YPR120C	0.327852	PPI
YJL187C	YMR001C	0.366098	PPI
YJL187C	YPR119W	0.367027	PPI
YJL194W	YJR046W	0.3012	PPI
YJL194W	YLL004W	0.342902	PPI
YJL194W	YLR274W	0.239343	PPI
YJL194W	YML065W	0.367501	PPI
YJL194W	YNL261W	0.363019	PPI
YJL194W	YPR119W	0.340029	PPI
YJL194W	YPR162C	0.342902	PPI
YJR046W	YLL004W	0.239848	PPI
YJR046W	YLR274W	0.357153	PPI
YJR046W	YML065W	0.239343	PPI
YJR046W	YNL261W	0.316677	PPI
YJR046W	YPR019W	0.365192	PPI
YJR046W	YPR162C	0.239848	PPI
YJR053W	YML064C	0.365266	PPI
YJR053W	YMR001C	0.360188	PPI
YJR053W	YMR055C	0.363346	PPI
YJR090C	YMR199W	0.347031	PPI
YJR090C	YOL133W	0.345022	PPI
YJR090C	YPL256C	0.377629	PPI
YKL022C	YLR102C	0.380439	PPI
YKL022C	YLR127C	0.382195	PPI
YKL022C	YMR001C	0.250513	PPI
YKL022C	YNL172W	0.38159	PPI
YKL022C	YOR249C	0.380866	PPI
YLL004W	YML065W	0.377778	PPI
YLL004W	YMR036C	0.140971	PPI
YLL004W	YNL261W	0.356655	PPI
YLL004W	YPR162C	0.350012	PPI
YLR079W	YLR210W	0.330182	PPI
YLR079W	YPL031C	0.280408	PPI
YLR079W	YPL256C	0.29215	PPI
YLR079W	YPR119W	0.354783	PPI
YLR079W	YPR120C	0.378232	PPI
YLR086W	YLR272C	0.328286	PPI
YLR102C	YLR127C	0.297317	PPI
YLR102C	YMR001C	0.296128	PPI
YLR102C	YNL172W	0.213221	PPI
YLR102C	YOR249C	0.304057	PPI
YLR102C	YPL031C	0.250513	PPI
YLR103C	YLR274W	0.379473	PPI
YLR103C	YMR043W	0.229153	PPI
YLR103C	YPL153C	0.320794	PPI
YLR103C	YPR019W	0.38244	PPI
YLR127C	YMR001C	0.267785	PPI
YLR127C	YNL172W	0.370272	PPI
YLR127C	YOL133W	0.254054	PPI
YLR127C	YOR249C	0.334813	PPI
YLR182W	YMR043W	0.222702	PPI
YLR182W	YNL261W	0.140971	PPI
YLR182W	YOR083W	0.365062	PPI
YLR182W	YPL153C	0.325474	PPI
YLR274W	YML065W	0.250513	PPI
YLR274W	YMR043W	0.222702	PPI
YLR274W	YNL261W	0.239343	PPI
YLR274W	YPL031C	0.250513	PPI
YLR274W	YPL153C	0.267785	PPI
YLR274W	YPR019W	0.3775	PPI
YLR288C	YOR368W	0.365426	PPI
YLR288C	YPL194W	0.360865	PPI
YML027W	YMR043W	0.330186	PPI
YML064C	YMR001C	0.239343	PPI
YML064C	YMR055C	0.375859	PPI
YML065W	YNL261W	0.377192	PPI
YML065W	YPR019W	0.250513	PPI
YML065W	YPR120C	0.297283	PPI
YML065W	YPR162C	0.380693	PPI
YMR001C	YMR036C	0.3012	PPI
YMR001C	YMR055C	0.239343	PPI
YMR001C	YNL172W	0.267785	PPI
YMR001C	YOR195W	0.305583	PPI
YMR001C	YPL153C	0.352584	PPI
YMR036C	YNL261W	0.140971	PPI
YMR036C	YPR120C	0.228667	PPI
YMR199W	YPL031C	0.286721	PPI
YNL172W	YOR249C	0.321313	PPI
YNL261W	YPR162C	0.378333	PPI
YNL289W	YPL031C	0.367746	PPI
YOL001W	YPL031C	0.379141	PPI
YOL133W	YPR019W	0.229153	PPI
YOR083W	YPL031C	0.3012	PPI
YOR083W	YPL153C	0.229153	PPI
YOR083W	YPL256C	0.279712	PPI
YOR368W	YPL194W	0.344626	PPI
YPL031C	YPR019W	0.250513	PPI
YPL031C	YPR119W	0.239343	PPI
YPL153C	YPL194W	0.239848	PPI
YPL153C	YPR019W	0.239343	PPI
YAL040C	YDL056W	0.25	PDI
YAL040C	YER111C	0.25	PDI
YAL040C	YFR034C	0.25	PDI
YAL040C	YML027W	0.25	PDI
YAL040C	YMR043W	0.25	PDI
YBR093C	YDL106C	0.25	PDI
YBR093C	YFR034C	0.25	PDI
YBR202W	YML027W	0.25	PDI
YDL003W	YDL056W	0.25	PDI
YDL003W	YER111C	0.25	PDI
YDL056W	YDL101C	0.25	PDI
YDL056W	YDR451C	0.25	PDI
YDL056W	YGR109C	0.25	PDI
YDL056W	YJL194W	0.25	PDI
YDL056W	YLR103C	0.25	PDI
YDL056W	YMR199W	0.25	PDI
YDL056W	YNL289W	0.25	PDI
YDL056W	YPR120C	0.25	PDI
YDL127W	YER111C	0.25	PDI
YDL179W	YDR146C	0.25	PDI
YDR146C	YJL194W	0.25	PDI
YDR146C	YLR079W	0.25	PDI
YDR146C	YMR043W	0.25	PDI
YDR451C	YEL032W	0.25	PDI
YDR451C	YER111C	0.25	PDI
YDR451C	YGR092W	0.25	PDI
YDR451C	YPR019W	0.25	PDI
YDR507C	YER111C	0.25	PDI
YEL032W	YML027W	0.25	PDI
YER111C	YGR108W	0.25	PDI
YER111C	YGR109C	0.25	PDI
YER111C	YJL194W	0.25	PDI
YER111C	YKL101W	0.25	PDI
YER111C	YML027W	0.25	PDI
YER111C	YMR199W	0.25	PDI
YER111C	YNL289W	0.25	PDI
YER111C	YPL256C	0.25	PDI
YER111C	YPR120C	0.25	PDI
YGL116W	YML027W	0.25	PDI
YGR092W	YML027W	0.25	PDI
YGR108W	YMR043W	0.25	PDI
YGR109C	YML027W	0.25	PDI
YHR152W	YML027W	0.25	PDI
YIL106W	YML027W	0.25	PDI
YIL106W	YMR043W	0.25	PDI
YJL157C	YLR176C	0.25	PDI
YJL157C	YMR043W	0.25	PDI
YJL194W	YMR043W	0.25	PDI
YLR274W	YML027W	0.25	PDI
YML027W	YMR001C	0.25	PDI
YML027W	YPL256C	0.25	PDI
YML027W	YPR119W	0.25	PDI
YMR001C	YMR043W	0.25	PDI
YMR043W	YPR119W	0.25	PDI

## Sheet: c. inter-layer edge table Sc.CC
source	target	Weight_0'>5'	Weight_5'>10'	Weight_60'>65'	Weight_65'>70'
YDR146C	YDR146C	0.588428	0.478318	0.045022	0.190871
YPR019W	YPR019W	0.11975	0.2546	0.224614	0.172724
YPL256C	YPL256C	0.414256	0.368659	0.269841	0.310143
YDL003W	YDL003W	0.453512	0.400121	0.25764	0.253887
YCL024W	YCL024W	0.419931	0.323245	0.353522	0.322819
YDL155W	YDL155W	0.0777411	0.149371	0.125155	0.0766445
YCR084C	YCR084C	0.0826624	0.147236	0.138987	0.121679
YDL188C	YDL188C	0.120379	0.134739	0.118346	0.100079
YGR113W	YGR113W	0.0568773	0.100795	0.132392	0.0345867
YFR034C	YFR034C	0.00884766	0.0417009	0.17718	0.221849
YNL172W	YNL172W	0.215115	0.216451	0.128282	0.111611
YOR368W	YOR368W	0.145316	0.144753	0.0107507	0.0159586
YJL157C	YJL157C	0.303417	0.329971	0.185813	0.111516
YGL190C	YGL190C	0.131694	0.092388	0.0337042	0.0462887
YBR136W	YBR136W	0.0567843	0.0516846	0.0814521	0.043447
YDR110W	YDR110W	0.113397	0.0818844	0.0267684	0.0251347
YGR188C	YGR188C	0.281805	0.330343	0.151682	0.0989933
YGR233C	YGR233C	0.144675	0.0985196	0.0527223	0.0225559
YLR079W	YLR079W	0.264776	0.328426	0.408818	0.351107
YDR451C	YDR451C	0.124671	0.0802693	0.141252	0.115226
YOL001W	YOL001W	0.0408253	0.0706657	0.0386818	0.030184
YOL133W	YOL133W	0.135481	0.170128	0.12492	0.110582
YLR182W	YLR182W	0.0304692	0.0895638	0.0877187	0.0510173
YLR086W	YLR086W	0.0673641	0.0938175	0.159218	0.132682
YLR176C	YLR176C	0.130871	0.150515	0.0543963	0.0405497
YJR090C	YJR090C	0.143784	0.148015	0.0868874	0.0813469
YPR120C	YPR120C	0.349002	0.26386	0.2125	0.198184
YGR108W	YGR108W	0.5223	0.427921	0.186797	0.274418
YDL008W	YDL008W	0.0253692	0.0259339	0.0417444	0.0525799
YER111C	YER111C	0.326679	0.158519	0.318354	0.263194
YBR112C	YBR112C	0.0927509	0.157853	0.123484	0.0597244
YBL084C	YBL084C	0.0591269	0.0381623	0.0794314	0.0475468
YAL040C	YAL040C	0.234148	0.290004	0.0519346	0.0343515
YAL024C	YAL024C	0.136159	0.204035	0.205381	0.137225
YHR215W	YHR215W	0.272705	0.221675	0.212777	0.181342
YIL046W	YIL046W	0.0377423	0.110032	0.0580398	0.0704334
YDL017W	YDL017W	0.153746	0.110779	0.0199952	0.0482031
YDL028C	YDL028C	0.150284	0.12213	0.183771	0.144554
YOR026W	YOR026W	0.224419	0.195619	0.0380732	0.0338128
YLR103C	YLR103C	0.408047	0.362352	0.20222	0.180774
YOR195W	YOR195W	0.282765	0.299244	0.0778847	0.0388151
YHR166C	YHR166C	0.0284468	0.0397506	0.055992	0.0438656
YBR093C	YBR093C	0.357471	0.392753	0.236527	0.201515
YIL106W	YIL106W	0.383893	0.373321	0.133573	0.210233
YJR046W	YJR046W	0.021602	0.0446795	0.0282855	0.0178108
YPR119W	YPR119W	0.486701	0.375994	0.198588	0.265796
YKL022C	YKL022C	0.0669262	0.0571434	0.0506168	0.0197885
YGL086W	YGL086W	0.0577799	0.060531	0.0224455	0.044498
YJL187C	YJL187C	0.291466	0.275414	0.0967631	0.11762
YDL179W	YDL179W	0.365986	0.445303	0.510838	0.453748
YBL097W	YBL097W	0.144155	0.0259886	0.142348	0.136995
YMR001C	YMR001C	0.46137	0.338107	0.183418	0.271883
YDL056W	YDL056W	0.0643006	0.075701	0.148865	0.139501
YGR098C	YGR098C	0.0971553	0.220217	0.186053	0.102379
YJL074C	YJL074C	0.387947	0.310669	0.240053	0.2251
YJL030W	YJL030W	0.0900546	0.0812183	0.0616675	0.0630047
YHR152W	YHR152W	0.204149	0.342074	0.193672	0.100225
YIL026C	YIL026C	0.373138	0.315595	0.173197	0.167764
YFL029C	YFL029C	0.0287348	0.0235109	0.0342104	0.0288905
YDL132W	YDL132W	0.137711	0.157641	0.0613355	0.0645815
YGR092W	YGR092W	0.330897	0.409773	0.212994	0.129997
YBL016W	YBL016W	0.182114	0.145953	0.24157	0.284418
YDR325W	YDR325W	0.0509495	0.112397	0.228337	0.184802
YDR507C	YDR507C	0.336634	0.266635	0.142809	0.111436
YLR272C	YLR272C	0.16042	0.220616	0.169361	0.0944103
YAL016W	YAL016W	0.0292163	0.0465188	0.0297396	0.0401641
YDR499W	YDR499W	0.134392	0.118196	0.0626931	0.0784351
YFL009W	YFL009W	0.0471536	0.0420485	0.0350707	0.044452
YLR210W	YLR210W	0.105511	0.121625	0.173323	0.106155
YDL134C	YDL134C	0.066443	0.0917025	0.0115233	0.0159846
YHR118C	YHR118C	0.101789	0.0617857	0.0326929	0.0130714
YNL289W	YNL289W	0.414992	0.376965	0.189171	0.280513
YLL004W	YLL004W	0.0405293	0.0898429	0.112639	0.112559
YBR135W	YBR135W	0.0435819	0.0844763	0.029594	0.0400399
YLR127C	YLR127C	0.0304243	0.0136962	0.0568738	0.0555982
YMR199W	YMR199W	0.330103	0.297658	0.142587	0.159726
YER173W	YER173W	0.0766399	0.0572903	0.0794805	0.0518832
YBR060C	YBR060C	0.018705	0.0284588	0.0261686	0.0246713
YFR036W	YFR036W	0.16452	0.166989	0.0912534	0.059249
YGR040W	YGR040W	0.180107	0.173504	0.162569	0.151501
YFR028C	YFR028C	0.0894555	0.0878266	0.166718	0.111782
YDR113C	YDR113C	0.311435	0.370776	0.130042	0.0841475
YDL101C	YDL101C	0.328501	0.299894	0.0563361	0.0638851
YDR118W	YDR118W	0.0301127	0.0537004	0.032444	0.0174385
YPR162C	YPR162C	0.11085	0.101118	0.0538124	0.087301
YJL013C	YJL013C	0.0893916	0.0991704	0.186546	0.178616
YFL008W	YFL008W	0.29457	0.226383	0.147534	0.120306
YMR043W	YMR043W	0.186183	0.151199	0.0716985	0.051618
YGL003C	YGL003C	0.100904	0.10069	0.052966	0.0588683
YDR217C	YDR217C	0.0870463	0.057394	0.0345316	0.0255612
YMR055C	YMR055C	0.105727	0.166849	0.161671	0.116254
YDL127W	YDL127W	0.160891	0.0891599	0.224918	0.223036
YLR288C	YLR288C	0.0668335	0.12554	0.156521	0.101911
YDR052C	YDR052C	0.0557712	0.0886913	0.0458028	0.0370642
YJL194W	YJL194W	0.122661	0.205304	0.162822	0.0555701
YJR053W	YJR053W	0.0879911	0.254768	0.27057	0.177621
YBR274W	YBR274W	0.00997264	0.00919208	0.0418916	0.0416607
YOR249C	YOR249C	0.0281042	0.0346441	0.0739664	0.0828959
YDR328C	YDR328C	0.0238941	0.0287342	0.115828	0.103341
YPR111W	YPR111W	0.101152	0.0391072	0.179274	0.153759
YOR083W	YOR083W	0.15174	0.217941	0.223714	0.298342
YBR202W	YBR202W	0.149162	0.336444	0.221854	0.127893
YGL240W	YGL240W	0.0777903	0.0334891	0.0539797	0.043923
YML065W	YML065W	0.0551326	0.077407	0.160073	0.157503
YPL194W	YPL194W	0.145703	0.13276	0.0255047	0.0275828
YBR160W	YBR160W	0.216816	0.22245	0.0371461	0.0183872
YAR019C	YAR019C	0.0531907	0.0232161	0.03919	0.0514544
YBL023C	YBL023C	0.140337	0.213357	0.268669	0.187589
YNL261W	YNL261W	0.0509779	0.0730898	0.10837	0.0995284
YAR071W	YAR071W	0.229345	0.184047	0.156792	0.153066
YCL061C	YCL061C	0.340303	0.283686	0.206193	0.192728
YGR109C	YGR109C	0.475115	0.361578	0.355752	0.346499
YGL201C	YGL201C	0.117255	0.199499	0.18284	0.088676
YER147C	YER147C	0.103016	0.0907451	0.041185	0.0329075
YML064C	YML064C	0.172234	0.0890275	0.107429	0.0812336
YEL032W	YEL032W	0.139768	0.176934	0.28482	0.231311
YPL031C	YPL031C	0.1086	0.104134	0.0203712	0.0205831
YML027W	YML027W	0.435261	0.359983	0.184174	0.152199
YDR260C	YDR260C	0.058615	0.0991866	0.0751973	0.0768748
YPL153C	YPL153C	0.383699	0.333209	0.232417	0.228854
YDL106C	YDL106C	0.0124733	0.0209264	0.0499824	0.0398531
YLR102C	YLR102C	0.102699	0.122013	0.0562861	0.0182456
YMR036C	YMR036C	0.0443861	0.0438942	0.0703675	0.104585
YJL076W	YJL076W	0.0635221	0.0431837	0.0813387	0.0870275
YBR133C	YBR133C	0.141154	0.0568882	0.0463827	0.0132231
YLR274W	YLR274W	0.152316	0.255349	0.311926	0.256977
YFR031C	YFR031C	0.116471	0.0933719	0.0630019	0.114527
YGL116W	YGL116W	0.413803	0.51204	0.168472	0.112043
YKL101W	YKL101W	0.339165	0.31349	0.13054	0.161955
YDR180W	YDR180W	0.219631	0.0976613	0.105281	0.0605608

## Sheet: d. 0_10min_KEGGcc_GOenrichment
Term	Overlap	P-value	Adjusted P-value	Old P-value	Old Adjusted P-value	Z-score	Combined Score	Genes	Category
cell_cycle_progression_in_G1_phase	26/111	5.65288e-50	6.21817e-48	3.38986e-28	3.72884e-26	-1.9405	220.047	SIC1;CLB6;CLB5;MCM7;PCL9;CLB2;YOX1;CLB1;SWI4;CDC20;HSL1;CLN2;CDC45;DUN1;SWI5;PDS1;CDC28;CDC5;RAD53;MCM4;MCM5;FAR1;PCL2;PCL1;MCM1;MCM2	Phenotype AutoRIF
regulation_of_nuclear_cell_cycle_DNA_replication_(GO:0033262)	31/266	1.14641e-50	8.82736e-48	1.02974e-29	7.92898e-27	-1.75455	201.76	CLB6;SIC1;CLB5;MCM7;SPO12;YOX1;CLB2;CLB1;SMC3;SMC1;CDC20;HSL1;CLN2;CDC45;DUN1;MRC1;SWI5;PDS1;CDC28;BUB1;MAD2;MCD1;IRR1;CDC5;RAD53;MCM3;MCM4;MCM5;MCM6;MCM1;MCM2	GO Biological Process AutoRIF
mitotic_cell_cycle_phase_transition_(GO:0044772)	24/126	2.07903e-43	8.00426e-41	2.00992e-26	7.73818e-24	-1.58524	155.797	MAD2;CLB6;SIC1;CLB5;CLB2;CLB1;SWI4;CDC5;CDC20;HSL1;RAD53;CLN2;DUN1;MOB1;DBF2;SWI5;PDS1;CDC28;MCM4;MCM5;PCL2;BUB1;PCL1;MCM1	GO Biological Process AutoRIF
regulation_of_mitotic_cell_cycle_(GO:0007346)	23/108	1.06596e-42	2.73598e-40	3.46076e-26	8.88262e-24	-1.64148	158.64	MAD2;CLB6;SIC1;CLB5;SPO12;CLB2;MCD1;CLB1;SWI4;CDC5;SMC3;CDC20;HSL1;RAD53;CLN2;MOB1;DBF2;SWI5;PDS1;CDC28;BUB1;PCL1;MCM1	GO Biological Process AutoRIF
mitotic_DNA_replication_(GO:1902969)	23/138	5.22357e-40	1.00554e-37	5.29761e-24	1.01979e-21	-1.61503	146.08	MAD2;CLB6;SIC1;CLB5;MCM7;CLB2;MCD1;CLB1;CDC5;SMC3;CDC20;HSL1;RAD53;CDC45;DUN1;DBF2;PDS1;MCM3;CDC28;MCM4;MCM5;BUB1;MCM2	GO Biological Process AutoRIF
regulation_of_cyclin-dependent_protein_kinase_activity_(GO:1904029)	22/123	6.93476e-39	1.06795e-36	1.86411e-23	2.87073e-21	-1.58824	139.55	CLB6;SIC1;CLB5;PCL9;CLB2;CLB1;CDC5;CDC20;HSL1;RAD53;CLN2;DUN1;DBF2;SWI5;PDS1;CDC28;FAR1;PHO5;PCL2;PCL1;MCM1;MCM2	GO Biological Process AutoRIF
regulation_of_DNA_replication_(GO:0006275)	22/135	6.41855e-38	8.23714e-36	1.16893e-22	1.50013e-20	-1.71545	146.909	CLB6;SIC1;CLB5;CLB2;MCD1;SWI4;IRR1;CDC5;SMC3;HSL1;RAD53;CDC45;DUN1;MRC1;MCM3;CDC28;MCM4;MCM5;MCM6;PCL2;PCL1;MCM2	GO Biological Process AutoRIF
regulation_of_mitotic_nuclear_division_(GO:0007088)	20/103	5.9838e-36	6.58218e-34	8.57844e-22	9.43629e-20	-1.63672	132.745	MAD2;CLB6;SIC1;CLB5;SPO12;CLB2;MCD1;CLB1;CDC5;SMC3;CDC20;HSL1;RAD53;CLN2;MOB1;DBF2;SWI5;PDS1;CDC28;BUB1	GO Biological Process AutoRIF
DNA_replication_initiation_(GO:0006270)	20/111	3.08382e-35	2.96818e-33	3.24487e-21	3.12318e-19	-2.03164	161.443	CLB6;SIC1;CLB5;MCM7;CLB2;CLB1;SWI4;CDC5;RAD53;CDC45;DBF2;MRC1;PDS1;MCM3;CDC28;MCM4;MCM5;MCM6;MCM1;MCM2	GO Biological Process AutoRIF
regulation_of_meiotic_cell_cycle_(GO:0051445)	23/229	1.22918e-34	1.01347e-32	2.06164e-19	1.32289e-17	-1.77372	138.495	MAD2;CLB6;SIC1;CLB5;MCM7;CLB2;MCD1;CLB1;SWI4;IRR1;CDC5;SMC3;CDC20;RAD53;CDC45;DUN1;PDS1;MCM3;CDC28;MCM5;PCL2;PCL1;MCM2	GO Biological Process AutoRIF
mitotic_DNA_damage_checkpoint_(GO:0044773)	21/150	1.31619e-34	1.01347e-32	2.7285e-20	2.10095e-18	-1.5737	122.77	MAD2;CLB6;SIC1;CLB5;CLB2;MCD1;CLB1;SWI4;CDC5;CDC20;HSL1;RAD53;DUN1;DBF2;MRC1;PDS1;MCM3;CDC28;MCM5;BUB1;MCM2	GO Biological Process AutoRIF
mitotic_DNA_replication_checkpoint_(GO:0033314)	20/127	5.71625e-34	4.00137e-32	3.60825e-20	2.52577e-18	-1.65512	126.69	MAD2;CLB6;SIC1;CLB5;CLB2;CLB1;CDC5;CDC20;HSL1;RAD53;DUN1;DBF2;MRC1;PDS1;MCM3;CDC28;MCM4;MCM5;BUB1;MCM2	GO Biological Process AutoRIF
regulation_of_mitotic_cell_cycle_phase_transition_(GO:1901990)	18/78	9.9025e-34	6.35411e-32	1.08291e-20	9.26488e-19	-1.72149	130.825	CLB6;SIC1;CLB5;CLB2;CLB1;SWI4;CDC5;CDC20;HSL1;CLN2;DBF2;SWI5;PDS1;CDC28;MCM4;PCL2;PCL1;MCM1	GO Biological Process AutoRIF
cell_cycle_progression_in_G2_phase	22/217	4.1422e-33	2.27821e-31	3.38138e-16	1.85976e-14	-1.63865	122.184	MAD2;SIC1;CLB6;CLB5;CLB2;MCD1;CLB1;SWI4;CDC5;SMC3;SMC1;CDC20;HSL1;RAD53;DUN1;SWI5;PDS1;CDC28;FAR1;BUB1;MCM1;MCM2	Phenotype AutoRIF
regulation_of_DNA_damage_checkpoint_(GO:2000001)	19/126	8.13645e-32	4.81928e-30	8.87076e-19	5.25422e-17	-1.86329	133.386	MAD2;CLB6;SIC1;CLB5;CLB2;MCD1;SWI4;CDC5;CDC20;RAD53;CLN2;DUN1;MRC1;PDS1;MCM3;CDC28;MCM4;BUB1;MCM2	GO Biological Process AutoRIF
cell_cycle_G1/S_phase_transition_(GO:0044843)	18/124	9.09091e-30	5e-28	1.77667e-17	9.77167e-16	-1.75383	117.279	CLB6;SIC1;CLB5;YOX1;CLB2;CLB1;SWI4;CDC20;HSL1;RAD53;CLN2;CDC45;SWI5;CDC28;MCM4;MCM5;MCM1;MCM2	GO Biological Process AutoRIF
spindle_morphology	20/216	4.19633e-29	1.53866e-27	7.16081e-14	1.57538e-12	-1.79126	117.043	MAD2;SIC1;CLB6;CLB5;SPO12;CLB2;MCD1;CLB1;IRR1;CDC5;SMC3;SMC1;CDC20;HSL1;RAD53;DUN1;DBF2;PDS1;CDC28;BUB1	Phenotype AutoRIF
mitotic_spindle_checkpoint_(GO:0071174)	20/213	3.14031e-29	1.61203e-27	4.12566e-16	1.76486e-14	-1.48802	97.6599	MAD2;CLB6;SIC1;CLB5;CLB2;MCD1;CLB1;IRR1;CDC5;SMC3;SMC1;CDC20;RAD53;DBF2;PDS1;MCM3;CDC28;MCM4;BUB1;MCM2	GO Biological Process AutoRIF
cell_cycle_progression_in_anaphase	19/179	9.41829e-29	2.59003e-27	3.96734e-14	1.09102e-12	-1.60624	103.654	MAD2;SIC1;CLB6;CLB5;SPO12;CLB2;MCD1;CLB1;CDC5;SMC1;CDC20;HSL1;RAD53;DUN1;DBF2;SWI5;PDS1;CDC28;BUB1	Phenotype AutoRIF
mitotic_cell_cycle	17/114	2.75731e-28	6.06609e-27	8.47523e-15	3.10758e-13	-1.90973	121.188	MAD2;CLB6;CLB5;CLB2;MCD1;CLB1;CDC5;SMC3;CDC20;HSL1;RAD53;DBF2;MOB1;PDS1;CDC28;BUB1;MCM1	Phenotype AutoRIF
negative_regulation_of_mitotic_cell_cycle_(GO:0045930)	16/84	1.95152e-28	9.39171e-27	3.64055e-17	1.86881e-15	-1.73749	110.859	MAD2;CLB6;SIC1;CLB5;SPO12;CLB2;MCD1;CLB1;SWI4;CDC5;CDC20;HSL1;RAD53;DBF2;CDC28;MCM4	GO Biological Process AutoRIF
exit_from_mitosis_(GO:0010458)	17/118	5.15878e-28	2.33662e-26	2.0078e-16	9.66254e-15	-1.59448	100.184	MAD2;CLB6;SIC1;CLB5;SPO12;CLB2;CLB1;CDC5;CDC20;RAD53;MOB1;DBF2;SWI5;PDS1;CDC28;BUB1;MCM2	GO Biological Process AutoRIF
nuclear_DNA_replication_(GO:0033260)	17/121	8.13026e-28	3.47795e-26	2.94344e-16	1.3332e-14	-1.71273	106.834	SIC1;CLB5;MCM7;CLB2;MCD1;SMC3;RAD53;CDC45;DUN1;MRC1;PDS1;MCM3;CDC28;MCM4;MCM5;MCM6;MCM2	GO Biological Process AutoRIF
regulation_of_exit_from_mitosis_(GO:0007096)	18/165	2.07708e-27	8.41765e-26	1.81963e-15	6.67197e-14	-1.51417	93.0287	MAD2;CLB6;SIC1;CLB5;SPO12;CLB2;CLB1;CDC5;CDC20;HSL1;RAD53;MOB1;DBF2;SWI5;PDS1;MCM3;CDC28;MCM4	GO Biological Process AutoRIF
bud_neck_morphology	20/273	5.20406e-27	9.54078e-26	4.57599e-12	8.38932e-11	-1.5563	94.1876	MAD2;CLB5;CLB2;CLB1;GIN4;KCC4;CDC5;CDC20;HSL1;RAD53;DUN1;DBF2;MOB1;MRC1;SWI5;PDS1;CDC28;FAR1;PCL2;PCL1	Phenotype AutoRIF
regulation_of_meiosis_I_(GO:0060631)	17/136	6.67492e-27	2.56985e-25	1.75224e-15	6.67197e-14	-1.55958	93.9981	MAD2;CLB6;SIC1;CLB5;SPO12;CLB2;MCD1;CLB1;SWI4;CDC5;SMC3;CDC20;RAD53;DBF2;PDS1;CDC28;BUB1	GO Biological Process AutoRIF
DNA_replication_checkpoint_(GO:0000076)	16/111	2.41394e-26	8.44879e-25	1.92263e-15	6.72921e-14	-1.85847	109.623	MAD2;CLB6;SIC1;CLB5;CLB2;CDC5;CDC20;RAD53;CDC45;DUN1;MRC1;PDS1;CDC28;MCM4;BUB1;MCM2	GO Biological Process AutoRIF
mitotic_sister_chromatid_cohesion_(GO:0007064)	15/82	2.33699e-26	8.44879e-25	7.47894e-16	3.03094e-14	-1.74042	102.717	MAD2;CLB6;CLB5;CLB2;MCD1;IRR1;CDC5;SMC3;SMC1;CDC20;PDS1;MCM3;CDC28;MCM4;BUB1	GO Biological Process AutoRIF
regulation_of_cell_cycle_(GO:0051726)	19/253	8.39697e-26	2.81116e-24	1.37296e-13	3.56606e-12	-1.50168	86.7061	MAD2;SIC1;CLB5;YOX1;CLB2;MCD1;CLB1;SWI4;IRR1;CDC5;SMC3;CDC20;RAD53;CLN2;DUN1;MOB1;CDC28;MCM1;MCM2	GO Biological Process AutoRIF
mitotic_spindle_assembly_checkpoint_(GO:0007094)	17/160	1.21031e-25	3.88308e-24	2.10531e-14	6.75452e-13	-1.59316	91.4058	MAD2;SIC1;CLB5;CLB2;MCD1;IRR1;CDC5;SMC3;SMC1;CDC20;RAD53;DBF2;PDS1;MCM3;CDC28;BUB1;MCM2	GO Biological Process AutoRIF
spindle_assembly_checkpoint_(GO:0071173)	18/210	1.87659e-25	5.7799e-24	9.11739e-14	2.50728e-12	-1.44709	82.3906	MAD2;SIC1;CLB5;CLB2;MCD1;CLB1;IRR1;CDC5;SMC3;SMC1;CDC20;RAD53;DBF2;PDS1;MCM3;CDC28;BUB1;MCM2	GO Biological Process AutoRIF
cell_cycle_G2/M_phase_transition_(GO:0044839)	15/96	3.01505e-25	8.92919e-24	6.09872e-15	2.04174e-13	-1.70483	96.2564	MAD2;CLB6;SIC1;CLB5;CLB2;CLB1;SWI4;CDC5;HSL1;RAD53;CLN2;SWI5;PDS1;CDC28;MCM1	GO Biological Process AutoRIF
mitotic_nuclear_division_(GO:0140014)	16/133	5.16278e-25	1.47235e-23	2.57152e-14	7.92028e-13	-1.52191	85.1098	MAD2;CLB6;CLB5;CLB2;MCD1;CLB1;CDC5;SMC3;CDC20;HSL1;RAD53;MOB1;DBF2;PDS1;CDC28;BUB1	GO Biological Process AutoRIF
protein_localization_to_chromosome_(GO:0034502)	17/181	1.06855e-24	2.93851e-23	1.38937e-13	3.56606e-12	-1.57496	86.9311	MAD2;CLB5;MCD1;IRR1;CDC5;SMC3;SMC1;CDC20;RAD53;CDC45;DBF2;PDS1;MCM3;CDC28;MCM5;BUB1;MCM2	GO Biological Process AutoRIF
regulation_of_cell_cycle_process_(GO:0010564)	18/232	1.18408e-24	3.14393e-23	4.57342e-13	9.51766e-12	-1.46676	80.8083	MAD2;SIC1;CLB5;CLB2;SWI4;CDC5;SMC3;CDC20;HSL1;RAD53;CDC45;DUN1;PDS1;CDC28;FAR1;MCM6;BUB1;MCM2	GO Biological Process AutoRIF
mitotic_cytokinesis_(GO:0000281)	17/184	1.42671e-24	3.6619e-23	1.78644e-13	4.2523e-12	-1.51553	83.2127	MAD2;SIC1;CLB5;SPO12;CLB2;CLB1;CDC5;CDC20;HSL1;MOB1;DBF2;SWI5;PDS1;CDC28;MCM4;BUB1;MCM1	GO Biological Process AutoRIF
positive_regulation_of_cell_cycle_(GO:0045787)	18/238	1.89545e-24	4.70804e-23	6.9088e-13	1.36404e-11	-1.48926	81.3472	CLB6;SIC1;CLB5;CLB2;SWI4;CDC5;SMC3;CDC20;HSL1;RAD53;DUN1;SWI5;PDS1;CDC28;MCM5;FAR1;PCL1;MCM1	GO Biological Process AutoRIF
DNA_damage_checkpoint_(GO:0000077)	15/113	4.08565e-24	9.83109e-23	5.4149e-14	1.60364e-12	-2.04214	109.978	MAD2;CLB6;SIC1;CLB5;CLB2;SWI4;CDC5;CDC20;RAD53;DUN1;MRC1;PDS1;CDC28;BUB1;MCM2	GO Biological Process AutoRIF
mitotic_spindle_assembly_(GO:0090307)	15/116	6.19111e-24	1.44459e-22	7.69783e-14	2.19531e-12	-1.54635	82.6351	MAD2;SIC1;CLB5;CLB2;MCD1;CLB1;CDC5;CDC20;RAD53;DBF2;PDS1;MCM3;CDC28;BUB1;MCM2	GO Biological Process AutoRIF
cell_cycle_progression	17/211	1.56802e-23	2.46403e-22	8.91385e-11	1.22565e-09	-1.46028	76.6788	SIC1;CLB5;CLB2;CLB1;CDC20;HSL1;RAD53;CLN2;CDC45;DUN1;MRC1;PDS1;CDC28;MCM5;BUB1;MCM1;MCM2	Phenotype AutoRIF
regulation_of_nuclear_division_(GO:0051783)	16/160	1.13377e-23	2.56766e-22	3.66317e-13	8.05897e-12	-1.46229	77.2585	CLB6;CLB5;CLB2;MCD1;CLB1;SWI4;CDC5;SMC3;CDC20;RAD53;DBF2;PDS1;CDC28;MCM6;BUB1;MCM2	GO Biological Process AutoRIF
DNA_replication_(GO:0006260)	15/123	1.56356e-23	3.43983e-22	1.69144e-13	4.20132e-12	-1.95118	102.461	MCM7;SWI4;CDC5;SMC3;CDC20;RAD53;CDC45;DUN1;MRC1;MCM3;CDC28;MCM4;MCM5;MCM6;MCM2	GO Biological Process AutoRIF
spindle_assembly_(GO:0051225)	15/136	7.58637e-23	1.62264e-21	6.53082e-13	1.32335e-11	-1.73726	88.4842	MAD2;SIC1;CLB5;CLB2;MCD1;CLB1;CDC5;CDC20;RAD53;DBF2;PDS1;MCM3;CDC28;BUB1;MCM2	GO Biological Process AutoRIF
budding	14/111	3.50297e-22	4.81659e-21	2.82212e-11	4.43476e-10	-1.57166	77.6451	SIC1;CLB5;CLB2;MCD1;SWI4;CDC5;SMC3;CDC20;RAD53;CDC45;PDS1;CDC28;BUB1;MCM2	Phenotype AutoRIF
threonine_metabolic_process_(GO:0006566)	18/311	2.52662e-22	5.11973e-21	5.05888e-11	7.79067e-10	-2.01985	100.447	MAD2;CLB2;CLB1;CDC5;SMC3;CDC20;HSL1;RAD53;CLN2;CDC45;DUN1;MOB1;PDS1;CDC28;MCM4;MCM5;BUB1;MCM2	GO Biological Process AutoRIF
threonine_biosynthetic_process_(GO:0009088)	18/311	2.52662e-22	5.11973e-21	5.05888e-11	7.79067e-10	-2.01894	100.402	MAD2;CLB2;CLB1;CDC5;SMC3;CDC20;HSL1;RAD53;CLN2;CDC45;DUN1;MOB1;PDS1;CDC28;MCM4;MCM5;BUB1;MCM2	GO Biological Process AutoRIF
negative_regulation_of_mitotic_nuclear_division_(GO:0045839)	12/56	4.87827e-22	9.63145e-21	1.82241e-13	4.2523e-12	-1.83117	89.8595	CDC20;HSL1;MAD2;RAD53;CLB5;SPO12;DBF2;CLB2;MCD1;CDC28;MCM4;CDC5	GO Biological Process AutoRIF
mitotic_sister_chromatid_segregation_(GO:0000070)	14/115	5.90137e-22	1.13601e-20	1.33954e-12	2.57862e-11	-1.60206	78.3115	MAD2;CLB6;CLB5;CLB2;MCD1;IRR1;CDC5;SMC3;SMC1;CDC20;DBF2;PDS1;CDC28;BUB1	GO Biological Process AutoRIF
sister_chromatid_segregation_(GO:0000819)	16/210	1.00142e-21	1.88071e-20	1.80678e-11	3.2354e-10	-1.74941	84.589	MAD2;CLB6;SIC1;CLB5;CLB2;MCD1;IRR1;CDC5;SMC3;SMC1;CDC20;RAD53;DBF2;PDS1;CDC28;BUB1	GO Biological Process AutoRIF
regulation_of_mitotic_recombination_(GO:0000019)	15/163	1.27298e-21	2.3338e-20	7.45128e-12	1.39939e-10	-1.63356	78.5952	MAD2;CLB6;CLB5;MCM7;CLB2;MCD1;CLB1;CDC5;SMC3;RAD53;CDC45;DBF2;PDS1;CDC28;BUB1	GO Biological Process AutoRIF
mitotic_DNA_integrity_checkpoint_(GO:0044774)	12/61	1.51175e-21	2.70709e-20	4.4696e-13	9.51766e-12	-1.86066	89.2018	CDC20;RAD53;CLB5;CLB2;MRC1;MCD1;PDS1;SWI4;CDC28;MCM4;CDC5;BUB1	GO Biological Process AutoRIF
G2/M_transition_of_mitotic_cell_cycle_(GO:0000086)	11/41	1.87198e-21	3.27596e-20	2.55107e-13	5.77742e-12	-1.79516	85.6783	MAD2;RAD53;CLB6;DBF2;CLB2;CLB1;SWI5;PDS1;CDC28;CDC5;MCM1	GO Biological Process AutoRIF
regulation_of_phosphorylation_(GO:0042325)	17/292	4.31563e-21	7.38452e-20	1.97461e-10	2.62146e-09	-1.58201	74.1835	MCM7;CLB2;CLB1;CDC5;RAD53;CLN2;CDC45;DUN1;MOB1;MCM3;CDC28;MCM4;FAR1;MCM6;BUB1;MCM1;MCM2	GO Biological Process AutoRIF
meiosis_II_(GO:0007135)	16/240	8.82121e-21	1.47659e-19	1.20938e-10	1.72448e-09	-1.46008	67.4223	MAD2;CLB6;CLB5;SPO12;CLB2;MCD1;CLB1;SWI4;CDC5;SMC3;SMC1;CDC20;RAD53;DBF2;PDS1;CDC28	GO Biological Process AutoRIF
protein_localization_to_bud_neck_(GO:0097271)	16/243	1.0792e-20	1.76804e-19	1.4424e-10	1.98329e-09	-1.50806	69.334	SIC1;CLB5;CLB2;CLB1;GIN4;KCC4;CDC5;HSL1;RAD53;MOB1;DBF2;SWI5;CDC28;FAR1;PCL2;PCL1	GO Biological Process AutoRIF
negative_regulation_of_nuclear_division_(GO:0051784)	14/141	1.15932e-20	1.85974e-19	1.72089e-11	3.15497e-10	-1.52483	69.9955	MAD2;CLB5;SPO12;CLB2;MCD1;SWI4;CDC5;CDC20;HSL1;RAD53;DUN1;DBF2;CDC28;MCM4	GO Biological Process AutoRIF
regulation_of_proteolysis_(GO:0030162)	14/143	1.42209e-20	2.23471e-19	2.05273e-11	3.59228e-10	-1.60051	73.1428	MAD2;CLB6;SIC1;CLB5;CLB2;CLB1;CDC5;CDC20;RAD53;CLN2;SWI5;PDS1;CDC28;BUB1	GO Biological Process AutoRIF
cell_cycle_progression_in_metaphase	12/82	6.9896e-20	8.54284e-19	2.09634e-10	2.56219e-09	-1.51551	66.8452	CDC20;RAD53;MAD2;DUN1;CLB2;PDS1;MCD1;CDC28;SMC3;CDC5;BUB1;SMC1	Phenotype AutoRIF
inviable	18/428	7.99638e-20	8.79602e-19	4.36476e-07	2.66735e-06	-1.44891	63.7127	SIC1;CLB6;CLB5;CLB2;MCD1;CLB1;SWI4;GIN4;RAD53;CLN2;DUN1;SWI5;PDS1;CDC28;FAR1;MCM5;PCL2;PCL1	Phenotype AutoRIF
maintenance_of_protein_localization_in_organelle_(GO:0072595)	14/170	1.72282e-19	2.65315e-18	1.7822e-10	2.40753e-09	-1.5776	68.1605	CLB6;CLB5;MCM7;CLB1;CDC5;SMC3;RAD53;CDC45;MOB1;DBF2;MCM3;CDC28;MCM5;MCM2	GO Biological Process AutoRIF
regulation_of_protein_phosphorylation_(GO:0001932)	16/313	6.39355e-19	9.65301e-18	5.0573e-09	5.64366e-08	-1.5455	64.7469	MCM7;CLB2;CLB1;CDC5;RAD53;CLN2;CDC45;DUN1;MOB1;CDC28;MCM4;FAR1;MCM6;BUB1;MCM1;MCM2	GO Biological Process AutoRIF
chromosome_segregation	12/102	1.10954e-18	1.10954e-17	2.08288e-09	2.08288e-08	-1.57281	65.0241	CDC20;MAD2;RAD53;CLB5;CLB2;MCD1;PDS1;CDC28;IRR1;CDC5;SMC3;BUB1	Phenotype AutoRIF
DNA_replication_initiation_(GO:0006270)	15/200	2.96778e-20	2.14867e-17	2.68509e-12	1.94401e-09	-1.74003	78.2385	CLB6;CLB5;SWI4;IRR1;CDC5;SMC3;SMC1;CDC20;RAD53;CDC45;MRC1;PDS1;MCM6;BUB1;MCM2	GO Biological Process AutoRIF predicted Zscore
meiotic_sister_chromatid_segregation_(GO:0045144)	11/71	1.45564e-18	2.15547e-17	4.94612e-11	7.79067e-10	-1.60892	66.0801	CDC20;MAD2;RAD53;MCD1;PDS1;CDC28;IRR1;CDC5;SMC3;BUB1;SMC1	GO Biological Process AutoRIF
G1/S_transition_of_mitotic_cell_cycle_(GO:0000082)	10/46	1.54272e-18	2.2413e-17	2.18544e-11	3.73953e-10	-1.79035	73.4275	CDC20;CLB6;CLN2;CLB5;CLB2;CLB1;PDS1;SWI4;CDC28;MCM5	GO Biological Process AutoRIF
regulation_of_ubiquitin_protein_ligase_activity_(GO:1904666)	12/111	3.19988e-18	4.47984e-17	2.61253e-10	3.35274e-09	-1.96394	79.1142	CDC20;HSL1;MAD2;CLB6;SIC1;CLB5;CLB2;CLB1;PDS1;CDC28;CDC5;BUB1	GO Biological Process AutoRIF
chromosome_condensation_(GO:0030261)	13/155	3.1875e-18	4.47984e-17	7.56688e-10	9.24841e-09	-1.58172	63.7233	MCD1;IRR1;CDC5;SMC3;SMC1;RAD53;CDC45;PDS1;CDC28;MCM4;MCM5;BUB1;MCM2	GO Biological Process AutoRIF
replication_fork_processing_(GO:0031297)	11/77	3.76714e-18	5.17982e-17	1.09075e-10	1.58468e-09	-1.89043	75.8443	HSL1;RAD53;CDC45;DUN1;CLB2;MRC1;CDC28;MCM5;CDC5;SMC3;MCM2	GO Biological Process AutoRIF
meiotic_sister_chromatid_cohesion_(GO:0051177)	10/50	3.86569e-18	5.22207e-17	4.51603e-11	7.5342e-10	-1.57264	63.0539	CDC20;CLB5;MCD1;PDS1;CDC28;IRR1;CDC5;SMC3;BUB1;SMC1	GO Biological Process AutoRIF
L-serine_metabolic_process_(GO:0006563)	15/276	3.9399e-18	5.23056e-17	8.14521e-09	8.95973e-08	-1.59302	63.841	MAD2;CLB2;CLB1;CDC5;SMC3;RAD53;CLN2;CDC45;DUN1;MOB1;CDC28;MCM4;MCM5;BUB1;MCM2	GO Biological Process AutoRIF
meiosis	12/120	8.4515e-18	7.74721e-17	1.14729e-08	9.70787e-08	-1.55232	61.025	CDC20;RAD53;CLB5;DBF2;CLB2;MCD1;CLB1;PDS1;CDC28;CDC5;SMC3;BUB1	Phenotype AutoRIF
positive_regulation_of_cell_cycle_process_(GO:0090068)	10/53	7.30692e-18	9.53615e-17	7.51672e-11	1.13488e-09	-1.57276	62.0575	CDC20;HSL1;RAD53;SIC1;CLB5;CLB2;PDS1;SWI4;CDC28;CDC5	GO Biological Process AutoRIF
meiosis_I_(GO:0007127)	12/120	8.4515e-18	1.08461e-16	6.01317e-10	7.46797e-09	-1.49417	58.7389	CDC20;RAD53;CLB5;DBF2;CLB2;MCD1;CLB1;PDS1;CDC28;CDC5;SMC3;BUB1	GO Biological Process AutoRIF
negative_regulation_of_meiosis_I_(GO:0110029)	11/83	9.02573e-18	1.13931e-16	2.27003e-10	2.96258e-09	-1.63964	64.35	CDC20;SIC1;CLB5;SPO12;DUN1;DBF2;CLB2;SWI4;CDC28;CDC5;BUB1	GO Biological Process AutoRIF
replication_fork_arrest_(GO:0043111)	11/87	1.55729e-17	1.93406e-16	3.59679e-10	4.54021e-09	-1.75016	67.7329	HSL1;RAD53;CDC45;DUN1;CLB2;MRC1;CDC28;MCM5;CDC5;SMC3;MCM2	GO Biological Process AutoRIF
negative_regulation_of_mitotic_cell_cycle_phase_transition_(GO:1901991)	8/20	1.8652e-17	2.27969e-16	4.5988e-11	7.5342e-10	-1.73266	66.7432	HSL1;CLB5;CLB2;CLB1;SWI4;CDC28;MCM4;CDC5	GO Biological Process AutoRIF
serine_family_amino_acid_biosynthetic_process_(GO:0009070)	16/391	2.21618e-17	2.62532e-16	1.07294e-07	9.8353e-07	-1.47793	56.6758	CLB6;SIC1;CLB5;MCM7;CLB2;CDC5;CDC20;HSL1;RAD53;DUN1;MOB1;DBF2;PDS1;CDC28;MCM5;BUB1	GO Biological Process AutoRIF
serine_family_amino_acid_metabolic_process_(GO:0009069)	16/391	2.21618e-17	2.62532e-16	1.07294e-07	9.8353e-07	-1.47574	56.5918	CLB6;SIC1;CLB5;MCM7;CLB2;CDC5;CDC20;HSL1;RAD53;DUN1;MOB1;DBF2;PDS1;CDC28;MCM5;BUB1	GO Biological Process AutoRIF
negative_regulation_of_exit_from_mitosis_(GO:0001100)	9/36	2.2524e-17	2.62781e-16	8.4014e-11	1.24405e-09	-1.69562	64.9965	CDC20;HSL1;MAD2;SPO12;DBF2;CLB2;CDC28;MCM4;CDC5	GO Biological Process AutoRIF
replication_fork_protection_(GO:0048478)	9/38	3.88886e-17	4.46929e-16	1.27593e-10	1.7863e-09	-1.80911	68.3587	HSL1;RAD53;CDC45;CLB2;MRC1;CDC28;MCM5;CDC5;MCM2	GO Biological Process AutoRIF
maintenance_of_rDNA_(GO:0043007)	13/150	2.05806e-18	4.96678e-16	2.08359e-11	7.54261e-09	-1.59727	65.0483	SWI4;GIN4;KCC4;IRR1;SMC3;SMC1;HSL1;RAD53;CDC45;MRC1;MCM6;BUB1;MCM2	GO Biological Process AutoRIF predicted Zscore
establishment_of_protein_localization_to_chromosome_(GO:0070199)	14/200	1.7559e-18	4.96678e-16	4.28687e-11	8.05745e-09	-1.55367	63.5195	SWI4;GIN4;KCC4;IRR1;SMC3;SMC1;HSL1;RAD53;CDC45;MRC1;MCM3;MCM6;BUB1;MCM2	GO Biological Process AutoRIF predicted Zscore
nuclear_division_(GO:0000280)	13/199	8.70876e-17	9.86138e-16	1.33686e-08	1.4297e-07	-1.63232	60.3624	CLB5;MCD1;CLB1;CDC5;SMC3;CDC20;CDC45;MOB1;PDS1;MCM3;CDC28;BUB1;MCM2	GO Biological Process AutoRIF
histone_exchange_(GO:0043486)	13/200	9.30197e-17	1.03805e-15	1.41555e-08	1.49312e-07	-1.39683	51.562	MAD2;CLB6;CLB5;CLB2;MCD1;CLB1;IRR1;CDC5;SMC3;RAD53;PDS1;CDC28;BUB1	GO Biological Process AutoRIF
cell_cycle_progression_through_the_G2/M_phase_transition	9/43	1.33564e-16	1.13016e-15	3.3263e-09	3.04911e-08	-1.55906	56.9867	RAD53;HSL1;MAD2;SIC1;CLB5;PDS1;CDC28;SWI4;CDC5	Phenotype AutoRIF
regulation_of_meiotic_nuclear_division_(GO:0040020)	11/103	1.08487e-16	1.17655e-15	1.87676e-09	2.22324e-08	-1.70034	62.5044	CDC20;CLB6;SIC1;CLB5;CLB2;MCD1;CLB1;CDC28;CDC5;BUB1;MCM2	GO Biological Process AutoRIF
protein_localization_to_kinetochore_(GO:0034501)	11/103	1.08487e-16	1.17655e-15	1.87676e-09	2.22324e-08	-1.57376	57.8514	CDC20;MAD2;SPO12;DBF2;MCD1;PDS1;MCM3;CDC28;CDC5;BUB1;MCM2	GO Biological Process AutoRIF
regulation_of_cytokinesis_(GO:0032465)	11/107	1.67604e-16	1.79243e-15	2.72455e-09	3.1312e-08	-1.42365	51.714	CDC20;HSL1;MAD2;RAD53;MOB1;DBF2;CLB2;PDS1;CDC28;CDC5;BUB1	GO Biological Process AutoRIF
cell_cycle_progression_in_late_anaphase	8/26	2.29291e-16	1.80158e-15	2.04566e-09	2.08288e-08	-1.71951	61.9222	CDC20;MAD2;SIC1;CLB2;CLB1;PDS1;CDC28;CDC5	Phenotype AutoRIF
regulation_of_protein_localization_to_nucleus_(GO:1900180)	11/109	2.06984e-16	2.18325e-15	3.26556e-09	3.69777e-08	-1.6	57.7821	DBF2;CLB2;SWI5;PDS1;SWI4;CDC28;MCM5;IRR1;SMC3;BUB1;MCM2	GO Biological Process AutoRIF
DNA_replication,_Okazaki_fragment_processing_(GO:0033567)	12/124	1.26972e-17	2.29819e-15	4.45163e-11	8.05745e-09	-1.79001	69.6404	HSL1;CDC45;MRC1;SWI4;GIN4;KCC4;IRR1;MCM6;SMC3;BUB1;SMC1;MCM2	GO Biological Process AutoRIF predicted Zscore
cytokinesis	11/115	3.80648e-16	2.79142e-15	8.14616e-08	5.27105e-07	-1.40741	49.9695	CDC20;MAD2;HSL1;DBF2;MOB1;CLB2;PDS1;CDC28;GIN4;CDC5;BUB1	Phenotype AutoRIF
cell_cycle_progression_through_the_G1/S_phase_transition	9/51	7.12294e-16	4.89702e-15	1.25275e-08	9.84303e-08	-1.5151	52.8437	CDC20;RAD53;HSL1;SIC1;CLB5;CDC45;YOX1;CDC28;SWI4	Phenotype AutoRIF
protein_localization_to_nucleus_(GO:0034504)	12/167	4.93201e-16	5.13196e-15	2.02487e-08	2.08979e-07	-1.56615	55.2001	MAD2;RAD53;CLB2;SWI5;PDS1;MCM3;SWI4;CDC28;IRR1;CDC5;BUB1;MCM2	GO Biological Process AutoRIF
histone_H3-K79_methylation_(GO:0034729)	13/200	9.30197e-17	7.80591e-15	6.14583e-10	3.68969e-08	-1.95639	72.2177	MCD1;SWI4;IRR1;SMC3;SMC1;HSL1;RAD53;CDC45;MRC1;PDS1;MCM6;BUB1;MCM2	GO Biological Process AutoRIF predicted Zscore
mitotic_spindle_assembly_checkpoint_(GO:0007094)	13/200	9.30197e-17	7.80591e-15	6.14583e-10	3.68969e-08	-1.81112	66.8551	CLB6;SWI4;IRR1;CDC5;SMC3;SMC1;CDC20;RAD53;MRC1;PDS1;MCM6;BUB1;MCM2	GO Biological Process AutoRIF predicted Zscore
DNA_replication_checkpoint_(GO:0000076)	11/102	9.70349e-17	7.80591e-15	1.15158e-10	1.66749e-08	-1.70044	62.6978	HSL1;CDC45;MRC1;SWI4;GIN4;IRR1;MCM6;SMC3;BUB1;SMC1;MCM2	GO Biological Process AutoRIF predicted Zscore
chromatin_silencing_at_rDNA_(GO:0000183)	12/142	6.77173e-17	7.80591e-15	1.94219e-10	2.34357e-08	-1.5619	58.1515	HSL1;RAD53;CDC45;MRC1;SWI4;GIN4;IRR1;MCM6;SMC3;BUB1;SMC1;MCM2	GO Biological Process AutoRIF predicted Zscore
mitotic_DNA_replication_checkpoint_(GO:0033314)	13/195	6.66725e-17	7.80591e-15	4.56777e-10	3.67451e-08	-1.35405	50.4338	CLB6;SWI4;IRR1;CDC5;SMC3;SMC1;CDC20;RAD53;MRC1;PDS1;MCM6;BUB1;MCM2	GO Biological Process AutoRIF predicted Zscore
regulation of cyclin-dependent protein kinase activity (GO:1904029)	8/22	4.72085e-17	1.03859e-14	7.80078e-11	1.71617e-08	-1.52166	57.202	CLB6;CLN2;SIC1;CLB5;CLB2;CLB1;PCL2;PCL1	GO Biological Process 2018
establishment_of_mitotic_sister_chromatid_cohesion_(GO:0034087)	12/156	2.1461e-16	1.55378e-14	5.38903e-10	3.68969e-08	-1.81099	65.3364	HSL1;CLB5;CDC45;MRC1;SWI4;GIN4;IRR1;MCM6;SMC3;BUB1;SMC1;MCM2	GO Biological Process AutoRIF predicted Zscore
DNA_replication_(GO:0006260)	11/112	2.81912e-16	1.70087e-14	2.9188e-10	3.01887e-08	-1.7685	63.3209	HSL1;CDC45;MRC1;SWI4;GIN4;IRR1;MCM6;SMC3;BUB1;SMC1;MCM2	GO Biological Process AutoRIF predicted Zscore
mitotic_chromosome_condensation_(GO:0007076)	12/159	2.70901e-16	1.70087e-14	6.62514e-10	3.68969e-08	-1.70217	61.0138	HSL1;CLB5;CDC45;MRC1;SWI4;GIN4;IRR1;MCM6;SMC3;BUB1;SMC1;MCM2	GO Biological Process AutoRIF predicted Zscore
replication_fork_arrest_(GO:0043111)	12/167	4.93201e-16	2.55056e-14	1.12751e-09	5.4421e-08	-1.92469	67.8368	HSL1;CDC45;MRC1;SWI4;GIN4;KCC4;IRR1;MCM6;SMC3;BUB1;SMC1;MCM2	GO Biological Process AutoRIF predicted Zscore
nuclear_DNA_replication_(GO:0033260)	11/117	4.62884e-16	2.55056e-14	4.50664e-10	3.67451e-08	-1.5113	53.3625	HSL1;CDC45;MRC1;SWI4;GIN4;IRR1;MCM6;SMC3;BUB1;SMC1;MCM2	GO Biological Process AutoRIF predicted Zscore
negative_regulation_of_DNA_biosynthetic_process_(GO:2000279)	14/349	4.3111e-15	4.36783e-14	1.12606e-06	8.41809e-06	-1.38479	45.8057	SIC1;CLB5;SPO12;CLB2;SWI4;CDC5;CDC20;RAD53;MRC1;SWI5;MCM3;CDC28;MCM4;PHO5	GO Biological Process AutoRIF
negative_regulation_of_DNA_metabolic_process_(GO:0051053)	14/349	4.3111e-15	4.36783e-14	1.12606e-06	8.41809e-06	-1.37433	45.4596	SIC1;CLB5;SPO12;CLB2;SWI4;CDC5;CDC20;RAD53;MRC1;SWI5;MCM3;CDC28;MCM4;PHO5	GO Biological Process AutoRIF
regulation_of_mitotic_sister_chromatid_separation_(GO:0010965)	8/36	4.37647e-15	4.37647e-14	2.37034e-09	2.76539e-08	-1.70336	56.3176	CDC20;MAD2;CLB5;CLB2;MCD1;PDS1;CDC28;BUB1	GO Biological Process AutoRIF
regulation of protein serine/threonine kinase activity (GO:0071900)	8/28	4.54831e-16	4.5993e-14	3.88491e-10	3.61223e-08	-1.70151	60.1085	CLB6;CLN2;SIC1;CLB5;CLB2;CLB1;PCL2;PCL1	GO Biological Process 2018
regulation of cyclin-dependent protein serine/threonine kinase activity (GO:0000079)	8/29	6.27178e-16	4.5993e-14	4.92577e-10	3.61223e-08	-1.53849	53.8552	CLB6;CLN2;SIC1;CLB5;CLB2;CLB1;PCL2;PCL1	GO Biological Process 2018
mitotic_DNA_replication_(GO:1902969)	12/178	1.07184e-15	5.1734e-14	2.24738e-09	7.64945e-08	-1.54343	53.2012	RAD53;CLB6;CDC45;MRC1;PDS1;SWI4;IRR1;MCM6;SMC3;BUB1;SMC1;MCM2	GO Biological Process AutoRIF predicted Zscore
mitotic_DNA_integrity_checkpoint_(GO:0044774)	11/127	1.17038e-15	5.29599e-14	1.01856e-09	5.26741e-08	-1.66979	57.4097	HSL1;CDC45;MRC1;SWI4;GIN4;IRR1;MCM6;SMC3;BUB1;SMC1;MCM2	GO Biological Process AutoRIF predicted Zscore
protein_phosphorylation_(GO:0006468)	12/204	5.58218e-15	5.51062e-14	1.65556e-07	1.45863e-06	-1.22434	40.1819	RAD53;DUN1;MOB1;MCD1;CLB1;PDS1;CDC28;GIN4;CDC5;SMC3;BUB1;MCM2	GO Biological Process AutoRIF
cell_cycle_passage_through_START	8/39	8.85886e-15	5.7322e-14	3.18376e-08	2.18883e-07	-1.60055	51.7896	RAD53;SIC1;CLB5;CLB2;CLB1;CDC28;SWI4;FAR1	Phenotype AutoRIF
mitotic cell cycle phase transition (GO:0044772)	9/54	1.2397e-15	6.81837e-14	1.81301e-09	8.08557e-08	-1.55144	53.2516	HSL1;CLB6;CLN2;SIC1;CLB5;CLB2;CLB1;CDC28;CDC5	GO Biological Process 2018
nucleosome_assembly_(GO:0006334)	11/133	1.9689e-15	8.38521e-14	1.6113e-09	6.70143e-08	-1.58718	53.7441	HSL1;CDC45;MRC1;SWI4;GIN4;IRR1;MCM6;SMC3;BUB1;SMC1;MCM2	GO Biological Process AutoRIF predicted Zscore
replication_fork_processing_(GO:0031297)	11/134	2.14202e-15	8.61567e-14	1.73575e-09	6.70143e-08	-1.81327	61.2468	HSL1;CDC45;MRC1;SWI4;GIN4;IRR1;MCM6;SMC3;BUB1;SMC1;MCM2	GO Biological Process AutoRIF predicted Zscore
ubiquitin-dependent_protein_catabolic_process_(GO:0006511)	10/105	1.0044e-14	9.78974e-14	3.18917e-08	3.23114e-07	-1.47967	47.6925	CDC20;CLN2;SIC1;CLB5;CLB2;SWI5;PDS1;SWI4;CDC28;CDC5	GO Biological Process AutoRIF
DNA_unwinding_involved_in_DNA_replication_(GO:0006268)	11/138	2.98117e-15	1.13598e-13	2.32442e-09	7.64945e-08	-1.67533	56.0339	HSL1;CDC45;MRC1;SWI4;GIN4;IRR1;MCM6;SMC3;BUB1;SMC1;MCM2	GO Biological Process AutoRIF predicted Zscore
mitotic_spindle_elongation_(GO:0000022)	10/107	1.2199e-14	1.17416e-13	3.76961e-08	3.76961e-07	-1.35765	43.4956	CDC20;MAD2;CLB5;CLB2;MCD1;CLB1;PDS1;CDC28;CDC5;BUB1	GO Biological Process AutoRIF
positive_regulation_of_cell_cycle_process_(GO:0090068)	12/200	4.39568e-15	1.32603e-13	7.8884e-09	1.90373e-07	-1.66396	55.0075	RAD53;CLB6;CDC45;MRC1;PDS1;SWI4;IRR1;MCM6;SMC3;BUB1;SMC1;MCM2	GO Biological Process AutoRIF predicted Zscore
mitotic_nuclear_division_(GO:0140014)	12/200	4.39568e-15	1.32603e-13	7.8884e-09	1.90373e-07	-1.61471	53.3793	CDC20;CLB6;MRC1;PDS1;SWI4;IRR1;MCM6;CDC5;SMC3;BUB1;SMC1;MCM2	GO Biological Process AutoRIF predicted Zscore
rDNA_condensation_(GO:0070550)	11/142	4.1079e-15	1.32603e-13	3.08634e-09	9.71526e-08	-1.59589	52.8653	HSL1;CDC45;MRC1;SWI4;GIN4;IRR1;MCM6;SMC3;BUB1;SMC1;MCM2	GO Biological Process AutoRIF predicted Zscore
mitotic_spindle_elongation_(GO:0000022)	12/200	4.39568e-15	1.32603e-13	7.8884e-09	1.90373e-07	-1.54851	51.191	CDC20;CLB6;CLB5;MRC1;PDS1;SWI4;IRR1;MCM6;CDC5;SMC3;BUB1;SMC1	GO Biological Process AutoRIF predicted Zscore
chromosome_condensation_(GO:0030261)	12/198	3.89327e-15	1.32603e-13	7.08065e-09	1.89866e-07	-1.44847	48.0594	HSL1;RAD53;CDC45;MRC1;PDS1;SWI4;IRR1;MCM6;SMC3;BUB1;SMC1;MCM2	GO Biological Process AutoRIF predicted Zscore
bud_morphology	10/114	2.33957e-14	1.42973e-13	7.50051e-07	4.3424e-06	-1.14378	35.899	HSL1;RAD53;CLN2;CLB5;DBF2;CLB2;CLB1;PDS1;CDC28;CDC5	Phenotype AutoRIF
DNA_repair_(GO:0006281)	10/100	6.06964e-15	1.62756e-13	1.85122e-09	6.70143e-08	-1.74316	57.0631	HSL1;MRC1;SWI4;GIN4;IRR1;MCM6;SMC3;BUB1;SMC1;MCM2	GO Biological Process AutoRIF predicted Zscore
base-excision_repair_(GO:0006284)	10/100	6.06964e-15	1.62756e-13	1.85122e-09	6.70143e-08	-1.67155	54.7191	HSL1;MRC1;SWI4;GIN4;IRR1;MCM6;SMC3;BUB1;SMC1;MCM2	GO Biological Process AutoRIF predicted Zscore
nucleotide-excision_repair_(GO:0006289)	10/100	6.06964e-15	1.62756e-13	1.85122e-09	6.70143e-08	-1.55799	51.0017	HSL1;MRC1;SWI4;GIN4;IRR1;MCM6;SMC3;BUB1;SMC1;MCM2	GO Biological Process AutoRIF predicted Zscore
regulation_of_DNA_replication_(GO:0006275)	11/148	6.52965e-15	1.68838e-13	4.65193e-09	1.3472e-07	-1.64397	53.696	HSL1;RAD53;CDC45;MRC1;SWI4;IRR1;MCM6;SMC3;BUB1;SMC1;MCM2	GO Biological Process AutoRIF predicted Zscore
cell_cycle_progression_in_telophase	7/24	2.99034e-14	1.73125e-13	3.17705e-08	2.18883e-07	-1.61597	50.3227	MAD2;SIC1;DBF2;PDS1;CDC28;CDC5;BUB1	Phenotype AutoRIF
regulation_of_spindle_assembly_(GO:0090169)	11/163	1.91698e-14	1.82231e-13	1.63153e-07	1.45863e-06	-1.3832	43.6889	CDC20;MAD2;RAD53;CLB5;DBF2;CLB2;MCD1;CLB1;PDS1;CDC28;BUB1	GO Biological Process AutoRIF
mitotic_recombination	10/118	3.33117e-14	1.83214e-13	1.00976e-06	5.55367e-06	-1.24458	38.623	RAD53;DUN1;CLB2;MCD1;PDS1;CDC28;CDC5;SMC3;BUB1;SMC1	Phenotype AutoRIF
regulation of cell cycle process (GO:0010564)	8/36	4.37647e-15	1.92564e-13	2.1645e-09	8.08557e-08	-1.62193	53.6252	CDC20;CLB6;CLN2;CLB5;DBF2;CLB2;MRC1;CLB1	GO Biological Process 2018
pheromone_sensitivity	11/175	4.21932e-14	2.21012e-13	4.26754e-06	2.13377e-05	-1.18838	36.5979	RAD53;SIC1;CLN2;CLB5;CLB2;MCD1;PDS1;CDC28;FAR1;PHO5;MCM2	Phenotype AutoRIF
double-strand break repair via homologous recombination (GO:0000724)	9/64	6.32815e-15	2.32032e-13	6.99275e-09	1.53841e-07	-1.78113	58.232	CDC45;MCM7;MCD1;MCM3;MCM4;MCM5;MCM6;SMC3;MCM2	GO Biological Process 2018
DNA_packaging_(GO:0006323)	11/154	1.01796e-14	2.54138e-13	6.89518e-09	1.89866e-07	-1.68537	54.2998	HSL1;CDC45;MRC1;SWI4;GIN4;IRR1;MCM6;SMC3;BUB1;SMC1;MCM2	GO Biological Process AutoRIF predicted Zscore
negative_regulation_of_phosphorylation_(GO:0042326)	10/117	3.05319e-14	2.83247e-13	8.31103e-08	7.99936e-07	-1.45837	45.3846	CDC20;HSL1;RAD53;DBF2;CLB2;SWI4;CDC28;FAR1;CDC5;MCM1	GO Biological Process AutoRIF
negative_regulation_of_protein_phosphorylation_(GO:0001933)	10/117	3.05319e-14	2.83247e-13	8.31103e-08	7.99936e-07	-1.45558	45.2976	CDC20;HSL1;RAD53;DBF2;CLB2;SWI4;CDC28;FAR1;CDC5;MCM1	GO Biological Process AutoRIF
mitotic_recombination_(GO:0006312)	10/118	3.33117e-14	3.05357e-13	8.96005e-08	8.41371e-07	-1.39404	43.2611	RAD53;DUN1;CLB2;MCD1;PDS1;CDC28;CDC5;SMC3;BUB1;SMC1	GO Biological Process AutoRIF
pre-replicative complex assembly involved in nuclear cell cycle DNA replication (GO:0006267)	7/21	1.00916e-14	3.17165e-13	2.20516e-09	8.08557e-08	-1.86743	60.1819	CDC45;MCM7;MCM3;MCM4;MCM5;MCM6;MCM2	GO Biological Process 2018
chromosome_organization_(GO:0051276)	11/158	1.35499e-14	3.27005e-13	8.88611e-09	2.07534e-07	-1.74815	55.8228	CLB5;CDC45;MRC1;PDS1;SWI4;IRR1;MCM6;SMC3;BUB1;SMC1;MCM2	GO Biological Process AutoRIF predicted Zscore
protein-DNA_complex_subunit_organization_(GO:0071824)	10/109	1.47599e-14	3.44716e-13	4.02894e-09	1.2154e-07	-1.53635	48.928	RAD53;CDC45;MRC1;SWI4;IRR1;MCM6;SMC3;BUB1;SMC1;MCM2	GO Biological Process AutoRIF predicted Zscore
replication_fork_protection_(GO:0048478)	11/160	1.55885e-14	3.5269e-13	1.00628e-08	2.2767e-07	-1.88039	59.7818	HSL1;CDC45;MRC1;SWI4;GIN4;IRR1;MCM6;SMC3;BUB1;SMC1;MCM2	GO Biological Process AutoRIF predicted Zscore
nuclear DNA replication (GO:0033260)	7/22	1.4779e-14	4.06422e-13	2.88848e-09	8.10802e-08	-1.5038	47.8893	CDC45;MCM7;MCM3;MCM4;MCM5;MCM6;MCM2	GO Biological Process 2018
regulation_of_kinase_activity_(GO:0043549)	13/323	4.69193e-14	4.25034e-13	2.96919e-06	2.13671e-05	-1.44847	44.4539	CLB6;CLB2;SWI4;CDC5;RAD53;CLN2;DUN1;MCM3;CDC28;MCM4;FAR1;MCM6;MCM2	GO Biological Process AutoRIF
mitotic_cell_cycle	12/200	4.39568e-15	4.43963e-13	1.98812e-07	2.008e-05	-1.75812	58.1202	CDC20;CLB6;MRC1;PDS1;SWI4;IRR1;MCM6;CDC5;SMC3;BUB1;SMC1;MCM2	Phenotype AutoRIF predicted Zscore
regulation_of_nucleocytoplasmic_transport_(GO:0046822)	13/325	5.07833e-14	4.54687e-13	3.17417e-06	2.24231e-05	-1.50345	46.0225	SIC1;CLB5;CLB2;SWI4;RAD53;CLN2;DUN1;MOB1;DBF2;SWI5;PDS1;MCM3;CDC28	GO Biological Process AutoRIF
regulation of cell proliferation (GO:0042127)	6/11	2.32126e-14	4.64251e-13	3.31692e-09	8.10802e-08	-2.3129	72.6115	CLB6;CLN2;CLB5;CLB2;CLB1;CDC28	GO Biological Process 2018
positive regulation of cell proliferation (GO:0008284)	6/11	2.32126e-14	4.64251e-13	3.31692e-09	8.10802e-08	-1.76345	55.3619	CLB6;CLN2;CLB5;CLB2;CLB1;CDC28	GO Biological Process 2018
DNA-dependent DNA replication (GO:0006261)	9/73	2.2019e-14	4.64251e-13	1.99693e-08	3.66104e-07	-1.58058	49.7043	RAD53;CDC45;MCM7;MCM3;MCM4;MCM5;MCM6;MCM1;MCM2	GO Biological Process 2018
regulation_of_G2/M_transition_of_mitotic_cell_cycle_(GO:0010389)	7/26	5.66649e-14	5.01517e-13	8.34959e-09	9.05519e-08	-1.59693	48.709	CLB6;DBF2;CLB2;CLB1;SWI5;CDC28;MCM1	GO Biological Process AutoRIF
mitotic_spindle_orientation_checkpoint_(GO:0031578)	8/49	6.39893e-14	5.59907e-13	2.03551e-08	2.08979e-07	-1.55428	47.219	CDC20;MAD2;CLB5;CLB2;PDS1;CDC28;CDC5;BUB1	GO Biological Process AutoRIF
homologous_chromosome_segregation_(GO:0045143)	10/127	7.05766e-14	6.10606e-13	1.71352e-07	1.48248e-06	-1.30787	39.6051	CDC20;RAD53;CLB6;CLB5;MCD1;PDS1;CDC28;IRR1;CDC5;SMC3	GO Biological Process AutoRIF
positive_regulation_of_protein_phosphorylation_(GO:0001934)	11/192	1.17619e-13	1.00629e-12	7.81559e-07	6.20412e-06	-1.42481	42.4184	CDC20;RAD53;SIC1;CLB5;DUN1;SWI5;CDC28;FAR1;CDC5;BUB1;MCM1	GO Biological Process AutoRIF
positive_regulation_of_phosphorylation_(GO:0042327)	11/193	1.24555e-13	1.05393e-12	8.21095e-07	6.38975e-06	-1.43004	42.4923	CDC20;RAD53;SIC1;CLB5;DUN1;SWI5;CDC28;FAR1;CDC5;BUB1;MCM1	GO Biological Process AutoRIF
chromatin_remodeling_(GO:0006338)	11/178	5.09372e-14	1.11753e-12	2.8796e-08	5.78113e-07	-1.48035	45.3108	HSL1;RAD53;CDC45;MRC1;SWI4;IRR1;MCM6;SMC3;BUB1;SMC1;MCM2	GO Biological Process AutoRIF predicted Zscore
mitotic_sister_chromatid_segregation_(GO:0000070)	11/179	5.41972e-14	1.15408e-12	3.04275e-08	5.79724e-07	-1.37803	42.0936	CLB5;MRC1;PDS1;SWI4;IRR1;MCM6;CDC5;SMC3;BUB1;SMC1;MCM2	GO Biological Process AutoRIF predicted Zscore
attachment_of_mitotic_spindle_microtubules_to_kinetochore_(GO:0051315)	10/125	6.00289e-14	1.24174e-12	1.38492e-08	2.94907e-07	-1.40411	42.7466	CLB6;CLB5;MRC1;CLB1;PDS1;SWI4;IRR1;CDC5;BUB1;SMC1	GO Biological Process AutoRIF predicted Zscore
regulation_of_nucleotide-excision_repair_(GO:2000819)	10/137	1.52574e-13	1.27698e-12	3.33612e-07	2.85424e-06	-1.48976	43.9646	CDC20;RAD53;DUN1;CLB2;MCD1;SWI4;CDC28;IRR1;CDC5;SMC3	GO Biological Process AutoRIF
spindle_pole_body_duplication_(GO:0030474)	10/138	1.64261e-13	1.36001e-12	3.55587e-07	3.00881e-06	-1.6157	47.5619	MAD2;CLB5;YOX1;CLB2;CLB1;PDS1;SWI4;CDC28;CDC5;BUB1	GO Biological Process AutoRIF
double-strand break repair via break-induced replication (GO:0000727)	7/27	7.63838e-14	1.40037e-12	9.64606e-09	1.92921e-07	-1.9548	59.0409	CDC45;MCM7;MCM3;MCM4;MCM5;MCM6;MCM2	GO Biological Process 2018
protein-DNA_complex_assembly_(GO:0065004)	10/144	2.52845e-13	2.07118e-12	5.16205e-07	4.32041e-06	-1.53957	44.6569	CDC20;RAD53;CDC45;MCM7;CLB2;PDS1;MCM3;CDC28;MCM5;MCM2	GO Biological Process AutoRIF
regulation_of_nuclear_cell_cycle_DNA_replication_(GO:0033262)	10/135	1.31409e-13	2.64278e-12	2.76765e-08	5.72509e-07	-1.52023	45.0908	CDC45;MRC1;PDS1;SWI4;IRR1;MCM6;SMC3;BUB1;SMC1;MCM2	GO Biological Process AutoRIF predicted Zscore
regulation_of_chromatin_silencing_at_rDNA_(GO:0061187)	11/195	1.39548e-13	2.65876e-12	7.04911e-08	1.10947e-06	-1.41358	41.8426	HSL1;CDC45;MRC1;SWI4;GIN4;IRR1;MCM6;SMC3;BUB1;SMC1;MCM2	GO Biological Process AutoRIF predicted Zscore
mitotic_sister_chromatid_cohesion_(GO:0007064)	11/195	1.39548e-13	2.65876e-12	7.04911e-08	1.10947e-06	-1.34822	39.9078	CLB5;MRC1;PDS1;SWI4;IRR1;MCM6;CDC5;SMC3;BUB1;SMC1;MCM2	GO Biological Process AutoRIF predicted Zscore
spindle_assembly_checkpoint_(GO:0071173)	11/200	1.84433e-13	2.6706e-12	9.02993e-08	1.12718e-06	-1.96803	57.7056	RAD53;CLB6;PDS1;SWI4;IRR1;MCM6;CDC5;SMC3;BUB1;SMC1;MCM2	GO Biological Process AutoRIF predicted Zscore
actomyosin_contractile_ring_organization_(GO:0044837)	11/200	1.84433e-13	2.6706e-12	9.02993e-08	1.12718e-06	-1.67133	49.006	CDC20;HSL1;CLB6;CLB5;SPO12;MCD1;CLB1;SWI5;PDS1;GIN4;CDC5	GO Biological Process AutoRIF predicted Zscore
septin_cytoskeleton_organization_(GO:0032185)	11/200	1.84433e-13	2.6706e-12	9.02993e-08	1.12718e-06	-1.64394	48.2029	CDC20;RAD53;CLB6;PDS1;SWI4;MCM4;IRR1;MCM6;CDC5;SMC3;MCM2	GO Biological Process AutoRIF predicted Zscore
regulation_of_DNA_damage_checkpoint_(GO:2000001)	11/200	1.84433e-13	2.6706e-12	9.02993e-08	1.12718e-06	-1.62104	47.5314	RAD53;MRC1;PDS1;SWI4;IRR1;MCM6;CDC5;SMC3;BUB1;SMC1;MCM2	GO Biological Process AutoRIF predicted Zscore
mitotic_G2/M_transition_checkpoint_(GO:0044818)	11/200	1.84433e-13	2.6706e-12	9.02993e-08	1.12718e-06	-1.60666	47.1097	CDC20;RAD53;CLB6;CDC45;PDS1;SWI4;IRR1;MCM6;SMC3;BUB1;MCM2	GO Biological Process AutoRIF predicted Zscore
establishment_of_spindle_localization_(GO:0051293)	11/200	1.84433e-13	2.6706e-12	9.02993e-08	1.12718e-06	-1.57056	46.0511	CLB6;CLB5;MRC1;PDS1;SWI4;IRR1;MCM6;CDC5;SMC3;SMC1;MCM2	GO Biological Process AutoRIF predicted Zscore
histone_exchange_(GO:0043486)	9/90	1.56297e-13	2.6706e-12	1.36443e-08	2.94907e-07	-1.55015	45.7092	CDC45;MRC1;PDS1;SWI4;MCM6;SMC3;BUB1;SMC1;MCM2	GO Biological Process AutoRIF predicted Zscore
homologous_chromosome_segregation_(GO:0045143)	11/200	1.84433e-13	2.6706e-12	9.02993e-08	1.12718e-06	-1.54345	45.2562	CLB5;MRC1;PDS1;SWI4;IRR1;MCM6;CDC5;SMC3;BUB1;SMC1;MCM2	GO Biological Process AutoRIF predicted Zscore
mitotic_DNA_damage_checkpoint_(GO:0044773)	11/200	1.84433e-13	2.6706e-12	9.02993e-08	1.12718e-06	-1.46872	43.0651	RAD53;MRC1;PDS1;SWI4;IRR1;MCM6;CDC5;SMC3;BUB1;SMC1;MCM2	GO Biological Process AutoRIF predicted Zscore
regulation_of_G2/M_transition_of_mitotic_cell_cycle_(GO:0010389)	11/197	1.56156e-13	2.6706e-12	7.78936e-08	1.12718e-06	-1.44782	42.6931	CDC20;RAD53;CDC45;CLB2;PDS1;MCM3;SWI4;MCM4;MCM5;MCM6;MCM2	GO Biological Process AutoRIF predicted Zscore
protein_localization_to_chromosome_(GO:0034502)	11/200	1.84433e-13	2.6706e-12	9.02993e-08	1.12718e-06	-1.39966	41.0401	RAD53;CDC45;MRC1;PDS1;SWI4;IRR1;MCM6;SMC3;BUB1;SMC1;MCM2	GO Biological Process AutoRIF predicted Zscore
chromatin_assembly_or_disassembly_(GO:0006333)	11/199	1.74531e-13	2.6706e-12	8.59814e-08	1.12718e-06	-1.35915	39.9272	HSL1;RAD53;CDC45;MRC1;SWI4;IRR1;MCM6;SMC3;BUB1;SMC1;MCM2	GO Biological Process AutoRIF predicted Zscore
positive_regulation_of_mitotic_cell_cycle_(GO:0045931)	8/60	3.57219e-13	2.89536e-12	8.493e-08	8.0736e-07	-1.45413	41.6761	CDC20;CLB6;SIC1;CLB5;CLB2;PDS1;CDC28;CDC5	GO Biological Process AutoRIF
maintenance_of_chromatin_silencing_at_telomere_(GO:0035392)	10/141	2.04289e-13	2.9001e-12	4.08992e-08	7.59257e-07	-1.52508	44.5618	RAD53;CDC45;MRC1;SWI4;IRR1;MCM6;SMC3;BUB1;SMC1;MCM2	GO Biological Process AutoRIF predicted Zscore
phosphorylation (GO:0016310)	10/139	1.76743e-13	2.99104e-12	3.4042e-07	3.4042e-06	-1.34137	39.3882	HSL1;RAD53;DUN1;MOB1;DBF2;CDC28;GIN4;KCC4;CDC5;BUB1	GO Biological Process 2018
budding_pattern	9/105	6.50767e-13	3.25383e-12	3.53943e-06	1.85399e-05	-1.26722	35.5589	RAD53;SIC1;DBF2;CLB2;CLB1;SWI5;CDC28;CDC5;BUB1	Phenotype AutoRIF
nucleus_localization_(GO:0051647)	10/151	4.0857e-13	3.27707e-12	7.81341e-07	6.20412e-06	-1.5544	44.341	RAD53;CLB2;SWI5;PDS1;MCM3;CDC28;IRR1;CDC5;BUB1;MCM2	GO Biological Process AutoRIF
protein_acetylation_(GO:0006473)	10/143	2.3562e-13	3.28056e-12	4.64083e-08	8.3999e-07	-1.53425	44.6107	RAD53;CDC45;MRC1;SWI4;IRR1;MCM6;SMC3;BUB1;SMC1;MCM2	GO Biological Process AutoRIF predicted Zscore
intra-S_DNA_damage_checkpoint_(GO:0031573)	10/144	2.52845e-13	3.45396e-12	4.94013e-08	8.72354e-07	-1.51619	43.9785	HSL1;CDC45;MRC1;SWI4;IRR1;MCM6;SMC3;BUB1;SMC1;MCM2	GO Biological Process AutoRIF predicted Zscore
regulation_of_DNA_metabolic_process_(GO:0051052)	12/295	4.57541e-13	3.59496e-12	7.16362e-06	4.75516e-05	-1.16734	33.1674	RAD53;CLN2;CDC45;MCM7;DUN1;YOX1;CLB2;CLB1;SWI4;CDC28;MCM1;MCM2	GO Biological Process AutoRIF
regulation_of_DNA_biosynthetic_process_(GO:2000278)	12/295	4.57541e-13	3.59496e-12	7.16362e-06	4.75516e-05	-1.13027	32.1142	RAD53;CLN2;CDC45;MCM7;DUN1;YOX1;CLB2;CLB1;SWI4;CDC28;MCM1;MCM2	GO Biological Process AutoRIF
protein phosphorylation (GO:0006468)	10/144	2.52845e-13	3.97328e-12	4.64044e-07	4.25374e-06	-1.60437	46.5365	HSL1;RAD53;DUN1;MOB1;DBF2;CDC28;GIN4;KCC4;CDC5;BUB1	GO Biological Process 2018
kinetochore_assembly_(GO:0051382)	10/156	5.67534e-13	4.41416e-12	1.03762e-06	7.9106e-06	-1.32412	37.3368	CDC20;MAD2;RAD53;SIC1;CLB5;MCD1;PDS1;CDC28;CDC5;BUB1	GO Biological Process AutoRIF
DNA_damage_checkpoint_(GO:0000077)	10/148	3.33596e-13	4.47265e-12	6.3152e-08	1.05981e-06	-1.76913	50.8251	HSL1;CDC45;MRC1;SWI4;IRR1;MCM6;SMC3;BUB1;SMC1;MCM2	GO Biological Process AutoRIF predicted Zscore
telomere_capping_(GO:0016233)	9/99	3.78134e-13	4.97762e-12	2.95444e-08	5.78113e-07	-1.67989	48.0507	HSL1;MRC1;SWI4;IRR1;MCM6;SMC3;BUB1;SMC1;MCM2	GO Biological Process AutoRIF predicted Zscore
regulation_of_endodeoxyribonuclease_activity_(GO:0032071)	10/159	6.87596e-13	5.29449e-12	1.22444e-06	9.06557e-06	-1.40566	39.3662	RAD53;CLB6;SIC1;DUN1;CLB1;SWI5;SWI4;CDC28;PHO5;CDC5	GO Biological Process AutoRIF
cytoskeleton_morphology	10/168	1.19609e-12	5.72043e-12	2.02275e-05	9.27095e-05	-1.28277	35.2145	CDC20;HSL1;CLB5;DUN1;CLB2;MCD1;PDS1;CDC28;CDC5;BUB1	Phenotype AutoRIF
protein_sumoylation_(GO:0016925)	11/228	7.76417e-13	5.91922e-12	3.94329e-06	2.7603e-05	-1.47966	41.259	MAD2;RAD53;CLB2;MRC1;MCD1;PDS1;MCM3;CDC28;CDC5;SMC3;MCM1	GO Biological Process AutoRIF
mitotic_chromosome_condensation_(GO:0007076)	8/66	7.9484e-13	6.00026e-12	1.667e-07	1.45863e-06	-1.55732	43.3878	MCD1;PDS1;CDC28;MCM4;CDC5;SMC3;BUB1;SMC1	GO Biological Process AutoRIF
budding	11/200	1.84433e-13	6.20926e-12	1.79296e-06	4.92118e-05	-1.92888	56.5578	RAD53;CDC45;MRC1;PDS1;SWI4;IRR1;MCM6;SMC3;BUB1;SMC1;MCM2	Phenotype AutoRIF predicted Zscore
chromosome_segregation	11/200	1.84433e-13	6.20926e-12	1.79296e-06	4.92118e-05	-1.77602	52.0755	CLB5;MRC1;PDS1;SWI4;IRR1;MCM6;CDC5;SMC3;BUB1;SMC1;MCM2	Phenotype AutoRIF predicted Zscore
DNA replication initiation (GO:0006270)	7/34	4.57926e-13	6.29649e-12	3.85658e-08	5.65631e-07	-1.50141	42.6581	RAD53;CDC45;MCM7;MCM3;MCM4;MCM5;MCM1	GO Biological Process 2018
regulation of mitotic nuclear division (GO:0007088)	7/34	4.57926e-13	6.29649e-12	3.85658e-08	5.65631e-07	-1.3712	38.9585	CLB6;CLN2;CLB5;SPO12;MOB1;CLB2;CLB1	GO Biological Process 2018
nucleosome_mobilization_(GO:0042766)	10/156	5.67534e-13	7.33741e-12	1.01149e-07	1.24122e-06	-1.40454	39.6045	HSL1;CDC45;MRC1;SWI4;IRR1;MCM6;SMC3;BUB1;SMC1;MCM2	GO Biological Process AutoRIF predicted Zscore
positive regulation of cellular process (GO:0048522)	6/17	6.16238e-13	7.97485e-12	2.60412e-08	4.40696e-07	-1.59478	44.8374	CLB6;CLN2;CLB5;CLB2;CLB1;CDC28	GO Biological Process 2018
protein_localization_to_kinetochore_(GO:0034501)	10/158	6.45265e-13	8.196e-12	1.13342e-07	1.36766e-06	-1.3781	38.6821	CLB6;CLB5;MRC1;PDS1;SWI4;IRR1;CDC5;SMC3;BUB1;SMC1	GO Biological Process AutoRIF predicted Zscore
chromatin_disassembly_(GO:0031498)	10/159	6.87596e-13	8.5831e-12	1.19912e-07	1.40585e-06	-1.53599	43.0163	HSL1;CDC45;MRC1;SWI4;IRR1;MCM6;SMC3;BUB1;SMC1;MCM2	GO Biological Process AutoRIF predicted Zscore
postreplication_repair_(GO:0006301)	9/106	7.10119e-13	8.71401e-12	5.13838e-08	8.85758e-07	-1.39672	39.0708	CDC45;MRC1;SWI4;IRR1;MCM6;SMC3;BUB1;SMC1;MCM2	GO Biological Process AutoRIF predicted Zscore
meiotic_recombination_checkpoint_(GO:0051598)	9/113	1.27799e-12	9.55391e-12	7.15077e-07	5.79589e-06	-1.43344	39.2559	MAD2;RAD53;CLB6;SIC1;DUN1;MCD1;CLB1;PDS1;CDC28	GO Biological Process AutoRIF
protein-DNA_complex_disassembly_(GO:0032986)	9/109	9.17952e-13	1.10766e-11	6.44081e-08	1.05981e-06	-1.43096	39.6614	HSL1;MRC1;SWI4;IRR1;MCM6;SMC3;BUB1;SMC1;MCM2	GO Biological Process AutoRIF predicted Zscore
mitotic_spindle_organization_(GO:0007052)	9/115	1.50099e-12	1.11131e-11	8.21539e-07	6.38975e-06	-1.33167	36.2546	CDC20;MAD2;CLB5;DBF2;MCD1;PDS1;CDC28;CDC5;BUB1	GO Biological Process AutoRIF
protein_complex_assembly_(GO:0006461)	10/167	1.12649e-12	1.33701e-11	1.85776e-07	2.10159e-06	-1.31337	36.1332	RAD53;CDC45;MRC1;SWI4;IRR1;MCM6;SMC3;BUB1;SMC1;MCM2	GO Biological Process AutoRIF predicted Zscore
protein_dephosphorylation_(GO:0006470)	10/176	1.90704e-12	1.3985e-11	2.94729e-06	2.13671e-05	-1.28968	34.8026	CDC20;RAD53;SIC1;CLB5;DUN1;DBF2;CLB2;PDS1;CDC28;CDC5	GO Biological Process AutoRIF
sister_chromatid_biorientation_(GO:0031134)	7/42	2.26925e-12	1.64842e-11	1.51543e-07	1.3728e-06	-1.52188	40.804	CDC20;MCD1;PDS1;CDC28;SMC3;BUB1;SMC1	GO Biological Process AutoRIF
cell_cycle_progression_in_G2_phase	10/159	6.87596e-13	1.73618e-11	1.94898e-06	4.92118e-05	-1.79406	50.2437	RAD53;MRC1;PDS1;SWI4;IRR1;MCM6;SMC3;BUB1;SMC1;MCM2	Phenotype AutoRIF predicted Zscore
positive regulation of spindle pole body separation (GO:0010696)	5/8	1.56745e-12	1.91577e-11	4.62142e-08	6.35446e-07	-2.12589	57.7851	CLB5;CLB2;CLB1;CDC28;CDC5	GO Biological Process 2018
mitotic_G2/M_transition_checkpoint_(GO:0044818)	6/21	2.68578e-12	1.93276e-11	7.97214e-08	7.86993e-07	-1.65814	44.1779	MAD2;RAD53;CLB2;CLB1;PDS1;CDC5	GO Biological Process AutoRIF
histone_H3_acetylation_(GO:0043966)	9/118	1.90014e-12	2.18366e-11	1.22332e-07	1.40585e-06	-1.47209	39.7303	RAD53;MRC1;SWI4;IRR1;MCM6;SMC3;BUB1;SMC1;MCM2	GO Biological Process AutoRIF predicted Zscore
protein-DNA_complex_assembly_(GO:0065004)	9/118	1.90014e-12	2.18366e-11	1.22332e-07	1.40585e-06	-1.42785	38.5364	CDC45;MRC1;SWI4;IRR1;MCM6;SMC3;BUB1;SMC1;MCM2	GO Biological Process AutoRIF predicted Zscore
positive regulation of cell cycle (GO:0045787)	6/20	1.9213e-12	2.22466e-11	5.82684e-08	7.54062e-07	-1.63171	44.0202	CLB6;CLN2;CLB5;CLB2;CLB1;CDC28	GO Biological Process 2018
positive_regulation_of_protein_kinase_activity_(GO:0045860)	10/185	3.14054e-12	2.23909e-11	4.52269e-06	3.13736e-05	-1.41157	37.3878	CDC20;RAD53;CLB5;DUN1;PDS1;CDC28;FAR1;PHO5;CDC5;MCM1	GO Biological Process AutoRIF
cold_sensitivity	12/362	5.08178e-12	2.32915e-11	0.000644317	0.0023625	-1.12035	29.1351	MAD2;RAD53;CDC45;CLB5;MCM7;CLB2;MRC1;CDC28;SWI4;MCM4;MCM5;BUB1	Phenotype AutoRIF
protein_acetylation_(GO:0006473)	11/261	3.38531e-12	2.39146e-11	1.37522e-05	8.47133e-05	-1.43891	38.0038	CDC20;HSL1;RAD53;CLB5;CDC45;MCD1;CDC28;IRR1;SMC3;BUB1;MCM2	GO Biological Process AutoRIF
intra-S_DNA_damage_checkpoint_(GO:0031573)	8/80	3.92976e-12	2.75083e-11	6.50505e-07	5.3286e-06	-1.55177	40.7534	RAD53;DUN1;MRC1;PDS1;CDC28;MCM4;MCM6;MCM2	GO Biological Process AutoRIF
regulation_of_attachment_of_spindle_microtubules_to_kinetochore_(GO:0051988)	10/182	2.66714e-12	3.0172e-11	3.98884e-07	4.18539e-06	-1.29703	34.5658	CLB6;CLB5;MRC1;PDS1;SWI4;IRR1;CDC5;SMC3;BUB1;SMC1	GO Biological Process AutoRIF predicted Zscore
regulation_of_pseudohyphal_growth_(GO:2000220)	10/192	4.54956e-12	3.156e-11	6.21247e-06	4.27107e-05	-1.53723	40.1464	CDC20;HSL1;SIC1;CLB5;CLB2;CLB1;SWI5;CDC28;CDC5;MCM1	GO Biological Process AutoRIF
pyrimidine_deoxyribonucleotide_biosynthetic_process_(GO:0009221)	8/77	2.86523e-12	3.19143e-11	7.43903e-08	1.12718e-06	-1.40104	37.2373	CDC45;MRC1;SWI4;IRR1;SMC3;BUB1;SMC1;MCM2	GO Biological Process AutoRIF predicted Zscore
regulation_of_chromosome_organization_(GO:0033044)	10/185	3.14054e-12	3.44507e-11	4.61021e-07	4.76828e-06	-1.34106	35.5202	RAD53;CDC45;MRC1;SWI4;IRR1;MCM6;SMC3;BUB1;SMC1;MCM2	GO Biological Process AutoRIF predicted Zscore
chromatin_assembly_(GO:0031497)	9/125	3.21681e-12	3.47608e-11	1.94777e-07	2.16951e-06	-1.46972	38.8926	HSL1;CDC45;MRC1;SWI4;GIN4;MCM6;BUB1;SMC1;MCM2	GO Biological Process AutoRIF predicted Zscore
heterochromatin_assembly_(GO:0031507)	9/127	3.71771e-12	3.95827e-11	2.21364e-07	2.4283e-06	-1.39153	36.6223	HSL1;CDC45;MRC1;SWI4;GIN4;MCM6;BUB1;SMC1;MCM2	GO Biological Process AutoRIF predicted Zscore
chromosome_organization_(GO:0051276)	9/134	6.05774e-12	4.1647e-11	2.73864e-06	2.00833e-05	-1.51731	39.1917	CDC20;RAD53;CDC45;PDS1;CDC28;CDC5;SMC3;BUB1;MCM2	GO Biological Process AutoRIF
histone_acetylation_(GO:0016573)	9/128	3.9931e-12	4.18986e-11	2.35806e-07	2.54811e-06	-1.34374	35.2685	MRC1;SWI4;GIN4;IRR1;MCM6;SMC3;BUB1;SMC1;MCM2	GO Biological Process AutoRIF predicted Zscore
regulation_of_protein_kinase_activity_(GO:0045859)	11/277	6.45063e-12	4.39556e-11	2.36425e-05	0.000140036	-1.28687	33.1587	RAD53;CLB6;CLN2;DUN1;CLB2;CDC28;MCM4;FAR1;MCM6;CDC5;MCM2	GO Biological Process AutoRIF
histone_deacetylation_(GO:0016575)	10/191	4.31873e-12	4.46681e-11	6.11311e-07	5.90119e-06	-1.39637	36.5403	RAD53;MRC1;PDS1;SWI4;IRR1;MCM6;SMC3;BUB1;SMC1;MCM2	GO Biological Process AutoRIF predicted Zscore
cellular_protein_complex_localization_(GO:0034629)	9/136	6.9303e-12	4.68099e-11	3.0756e-06	2.19279e-05	-1.7861	45.8941	CDC20;RAD53;CLB2;CDC28;IRR1;CDC5;SMC3;BUB1;MCM2	GO Biological Process AutoRIF
regulation_of_cell_division_(GO:0051302)	10/202	7.54245e-12	5.05016e-11	9.5676e-06	6.29663e-05	-1.4186	36.331	RAD53;CDC45;MCM7;MOB1;CLB2;CLB1;CDC28;CDC5;SMC3;MCM2	GO Biological Process AutoRIF
regulation of nuclear division (GO:0051783)	6/23	4.98136e-12	5.4795e-11	1.17947e-07	1.3657e-06	-1.8548	48.2716	CDC20;CLB6;CLN2;CLB5;CLB2;CLB1	GO Biological Process 2018
proteasome_assembly_(GO:0043248)	10/204	8.31853e-12	5.52178e-11	1.04007e-05	6.7869e-05	-1.30721	33.3502	CDC20;RAD53;SIC1;DUN1;CLB2;PDS1;MCM3;CDC28;MCM1;MCM2	GO Biological Process AutoRIF
sister_chromatid_biorientation_(GO:0031134)	10/200	6.83177e-12	5.68529e-11	9.17338e-07	6.99108e-06	-1.83367	47.1426	CLB6;CLB5;MRC1;PDS1;SWI4;IRR1;CDC5;SMC3;BUB1;SMC1	GO Biological Process AutoRIF predicted Zscore
spindle_disassembly_(GO:0051230)	10/200	6.83177e-12	5.68529e-11	9.17338e-07	6.99108e-06	-1.77849	45.7241	CDC20;RAD53;CLB6;CLB1;PDS1;SWI4;IRR1;MCM6;CDC5;MCM2	GO Biological Process AutoRIF predicted Zscore
regulation_of_nuclear_division_(GO:0051783)	10/200	6.83177e-12	5.68529e-11	9.17338e-07	6.99108e-06	-1.74957	44.9804	MRC1;PDS1;SWI4;IRR1;MCM6;CDC5;SMC3;BUB1;SMC1;MCM2	GO Biological Process AutoRIF predicted Zscore
cellular_protein_complex_disassembly_(GO:0043624)	10/200	6.83177e-12	5.68529e-11	9.17338e-07	6.99108e-06	-1.74449	44.8498	RAD53;CDC45;MRC1;SWI4;IRR1;MCM6;SMC3;BUB1;SMC1;MCM2	GO Biological Process AutoRIF predicted Zscore
regulation_of_mitotic_cell_cycle_(GO:0007346)	10/200	6.83177e-12	5.68529e-11	9.17338e-07	6.99108e-06	-1.73157	44.5178	CDC20;RAD53;CLB6;PDS1;SWI4;IRR1;MCM6;CDC5;SMC3;MCM2	GO Biological Process AutoRIF predicted Zscore
regulation_of_meiotic_DNA_double-strand_break_formation_(GO:1903341)	10/200	6.83177e-12	5.68529e-11	9.17338e-07	6.99108e-06	-1.67673	43.1078	CLB5;MRC1;PDS1;SWI4;IRR1;MCM6;SMC3;BUB1;SMC1;MCM2	GO Biological Process AutoRIF predicted Zscore
mitotic_spindle_assembly_(GO:0090307)	10/200	6.83177e-12	5.68529e-11	9.17338e-07	6.99108e-06	-1.65878	42.6462	CDC20;CLB6;CLB5;CLB1;PDS1;SWI4;IRR1;MCM6;CDC5;SMC3	GO Biological Process AutoRIF predicted Zscore
meiotic_sister_chromatid_segregation_(GO:0045144)	10/200	6.83177e-12	5.68529e-11	9.17338e-07	6.99108e-06	-1.61914	41.6272	CLB5;MRC1;PDS1;SWI4;IRR1;MCM6;SMC3;BUB1;SMC1;MCM2	GO Biological Process AutoRIF predicted Zscore
cellular_bud_neck_septin_ring_organization_(GO:0032186)	10/200	6.83177e-12	5.68529e-11	9.17338e-07	6.99108e-06	-1.59984	41.1309	CDC20;HSL1;RAD53;CLB6;CLB5;CLB1;PDS1;SWI4;MCM6;CDC5	GO Biological Process AutoRIF predicted Zscore
G1/S_transition_of_mitotic_cell_cycle_(GO:0000082)	10/200	6.83177e-12	5.68529e-11	9.17338e-07	6.99108e-06	-1.57414	40.4701	CDC20;RAD53;CLB6;CLB1;PDS1;SWI4;IRR1;MCM6;CDC5;MCM2	GO Biological Process AutoRIF predicted Zscore
regulation_of_chromatin_organization_(GO:1902275)	9/133	5.65906e-12	5.68529e-11	3.21018e-07	3.4179e-06	-1.52444	39.4795	RAD53;MRC1;SWI4;IRR1;MCM6;SMC3;BUB1;SMC1;MCM2	GO Biological Process AutoRIF predicted Zscore
protein_localization_to_chromatin_(GO:0071168)	10/200	6.83177e-12	5.68529e-11	9.17338e-07	6.99108e-06	-1.51492	38.9477	RAD53;CDC45;MRC1;MCM3;SWI4;IRR1;MCM6;SMC3;SMC1;MCM2	GO Biological Process AutoRIF predicted Zscore
protein_deacetylation_(GO:0006476)	10/200	6.83177e-12	5.68529e-11	9.17338e-07	6.99108e-06	-1.44972	37.2714	RAD53;MRC1;PDS1;SWI4;IRR1;MCM6;SMC3;BUB1;SMC1;MCM2	GO Biological Process AutoRIF predicted Zscore
mitotic_spindle_checkpoint_(GO:0071174)	10/200	6.83177e-12	5.68529e-11	9.17338e-07	6.99108e-06	-1.44788	37.2241	CDC20;CLB6;PDS1;SWI4;IRR1;MCM6;CDC5;SMC3;SMC1;MCM2	GO Biological Process AutoRIF predicted Zscore
negative_regulation_of_exit_from_mitosis_(GO:0001100)	10/200	6.83177e-12	5.68529e-11	9.17338e-07	6.99108e-06	-1.39468	35.8564	CDC20;RAD53;CLB6;CLB1;PDS1;SWI4;MCM5;MCM6;CDC5;MCM2	GO Biological Process AutoRIF predicted Zscore
negative_regulation_of_ATPase_activity_(GO:0032780)	10/196	5.58727e-12	5.68529e-11	7.6783e-07	6.99108e-06	-1.35926	35.219	HSL1;RAD53;MRC1;SWI4;IRR1;MCM6;SMC3;BUB1;SMC1;MCM2	GO Biological Process AutoRIF predicted Zscore
mitotic_recombination_(GO:0006312)	10/200	6.83177e-12	5.68529e-11	9.17338e-07	6.99108e-06	-1.31947	33.9229	RAD53;CDC45;MRC1;SWI4;IRR1;MCM6;SMC3;BUB1;SMC1;MCM2	GO Biological Process AutoRIF predicted Zscore
pheromone-induced_cell_cycle_arrest	8/94	1.4783e-11	6.50452e-11	1.40927e-05	6.73999e-05	-1.13413	28.2823	SIC1;CLN2;CLB5;CDC28;SWI4;FAR1;PCL1;MCM1	Phenotype AutoRIF
regulation of spindle pole body separation (GO:0010695)	5/10	7.03236e-12	7.36723e-11	1.0647e-07	1.3013e-06	-2.44546	62.8006	CLB5;CLB2;CLB1;CDC28;CDC5	GO Biological Process 2018
cell_cycle_progression_in_anaphase	10/200	6.83177e-12	7.66676e-11	1.41113e-05	0.000142524	-1.9361	49.7759	CDC20;RAD53;CLB6;PDS1;SWI4;IRR1;MCM6;CDC5;SMC3;MCM2	Phenotype AutoRIF predicted Zscore
cell_cycle_progression_through_the_G2/M_phase_transition	10/200	6.83177e-12	7.66676e-11	1.41113e-05	0.000142524	-1.87603	48.2317	CDC20;RAD53;CLB6;PDS1;MCM3;SWI4;IRR1;MCM6;SMC3;MCM2	Phenotype AutoRIF predicted Zscore
spindle_morphology	10/200	6.83177e-12	7.66676e-11	1.41113e-05	0.000142524	-1.777	45.6858	CDC20;CLB6;CLB5;PDS1;SWI4;IRR1;CDC5;SMC3;BUB1;SMC1	Phenotype AutoRIF predicted Zscore
mitotic_recombination	10/200	6.83177e-12	7.66676e-11	1.41113e-05	0.000142524	-1.65098	42.4458	RAD53;CDC45;MRC1;SWI4;IRR1;MCM6;SMC3;BUB1;SMC1;MCM2	Phenotype AutoRIF predicted Zscore
silencing	10/200	6.83177e-12	7.66676e-11	1.41113e-05	0.000142524	-1.55253	39.9146	HSL1;RAD53;MRC1;SWI4;IRR1;MCM6;SMC3;BUB1;SMC1;MCM2	Phenotype AutoRIF predicted Zscore
regulation_of_nucleotide-excision_repair_(GO:2000819)	9/142	1.02516e-11	8.33948e-11	5.43196e-07	5.38731e-06	-1.52636	38.6225	HSL1;MRC1;SWI4;IRR1;MCM6;SMC3;BUB1;SMC1;MCM2	GO Biological Process AutoRIF predicted Zscore
protein_complex_subunit_organization_(GO:0071822)	9/142	1.02516e-11	8.33948e-11	5.43196e-07	5.38731e-06	-1.51378	38.304	RAD53;CDC45;SWI4;IRR1;MCM6;SMC3;BUB1;SMC1;MCM2	GO Biological Process AutoRIF predicted Zscore
cell cycle G2/M phase transition (GO:0044839)	6/25	8.71302e-12	8.71302e-11	1.80504e-07	1.98554e-06	-1.82748	46.5391	HSL1;CLB6;CLN2;CLB5;CLB2;CLB1	GO Biological Process 2018
regulation_of_chromatin_silencing_(GO:0031935)	9/143	1.09243e-11	8.78798e-11	5.7464e-07	5.62215e-06	-1.50098	37.8847	HSL1;CDC45;MRC1;SWI4;MCM6;SMC3;BUB1;SMC1;MCM2	GO Biological Process AutoRIF predicted Zscore
regulation_of_helicase_activity_(GO:0051095)	10/216	1.46679e-11	9.65324e-11	1.68472e-05	0.000102145	-1.6365	40.8231	RAD53;DUN1;CLB2;MRC1;CDC28;MCM4;MCM5;MCM6;CDC5;MCM2	GO Biological Process AutoRIF
ATP-dependent_chromatin_remodeling_(GO:0043044)	9/146	1.31825e-11	1.0488e-10	6.78659e-07	6.46512e-06	-1.5215	38.1169	HSL1;CDC45;MRC1;SWI4;GIN4;MCM6;BUB1;SMC1;MCM2	GO Biological Process AutoRIF predicted Zscore
colony_color	9/143	1.09243e-11	1.10335e-10	7.3343e-06	0.000142524	-1.37727	34.7624	RAD53;CDC45;MCM3;SWI4;MCM5;IRR1;MCM6;SMC3;MCM2	Phenotype AutoRIF predicted Zscore
cellular protein modification process (GO:0006464)	10/213	1.27692e-11	1.2214e-10	1.35325e-05	9.60372e-05	-1.46907	36.85	HSL1;RAD53;DUN1;MOB1;DBF2;CDC28;GIN4;KCC4;CDC5;BUB1	GO Biological Process 2018
regulation_of_mitotic_spindle_organization_(GO:0060236)	9/149	1.58436e-11	1.24682e-10	7.98657e-07	6.99108e-06	-1.83466	45.6249	RAD53;CLB6;CDC45;SWI4;IRR1;MCM6;SMC3;SMC1;MCM2	GO Biological Process AutoRIF predicted Zscore
nucleosome_disassembly_(GO:0006337)	9/150	1.68305e-11	1.31025e-10	8.42551e-07	6.99108e-06	-1.24306	30.8377	RAD53;MRC1;SWI4;IRR1;MCM6;SMC3;BUB1;SMC1;MCM2	GO Biological Process AutoRIF predicted Zscore
G2/M transition of mitotic cell cycle (GO:0000086)	6/27	1.45195e-11	1.33096e-10	2.6809e-07	2.80856e-06	-1.43711	35.8639	HSL1;CLB6;CLN2;CLB5;CLB2;CLB1	GO Biological Process 2018
positive_regulation_of_kinase_activity_(GO:0033674)	10/226	2.29544e-11	1.49787e-10	2.46167e-05	0.000144694	-1.20444	29.5058	CDC20;RAD53;CLB5;DUN1;PDS1;CDC28;FAR1;PHO5;CDC5;MCM1	GO Biological Process AutoRIF
protein_acylation_(GO:0043543)	9/153	2.0125e-11	1.55005e-10	9.87041e-07	7.44393e-06	-1.41509	34.8524	RAD53;CDC45;MRC1;SWI4;IRR1;MCM6;BUB1;SMC1;MCM2	GO Biological Process AutoRIF predicted Zscore
telomere_maintenance_(GO:0000723)	8/100	2.44958e-11	1.86684e-10	4.86863e-07	4.96463e-06	-1.66728	40.7359	HSL1;MRC1;SWI4;GIN4;MCM6;BUB1;SMC1;MCM2	GO Biological Process AutoRIF predicted Zscore
aromatic_amino_acid_family_biosynthetic_process_(GO:0009073)	9/163	3.55972e-11	2.26528e-10	1.25621e-05	7.80068e-05	-1.32736	31.9346	CDC20;SIC1;CLB5;PCL9;CLB2;CDC28;MCM6;PCL2;PCL1	GO Biological Process AutoRIF
aromatic_amino_acid_family_catabolic_process_(GO:0009074)	9/163	3.55972e-11	2.26528e-10	1.25621e-05	7.80068e-05	-1.31772	31.7027	CDC20;SIC1;CLB5;PCL9;CLB2;CDC28;MCM6;PCL2;PCL1	GO Biological Process AutoRIF
aromatic_amino_acid_family_metabolic_process_(GO:0009072)	9/163	3.55972e-11	2.26528e-10	1.25621e-05	7.80068e-05	-1.30815	31.4725	CDC20;SIC1;CLB5;PCL9;CLB2;CDC28;MCM6;PCL2;PCL1	GO Biological Process AutoRIF
regulation_of_cellular_amino_acid_metabolic_process_(GO:0006521)	12/430	3.76479e-11	2.37614e-10	0.000266913	0.00126088	-1.26901	30.4598	CDC20;RAD53;CLN2;CLB5;CDC45;MCM7;DUN1;MOB1;CLB2;PDS1;CDC28;CDC5	GO Biological Process AutoRIF
protein_stabilization_(GO:0050821)	10/239	3.98632e-11	2.4955e-10	3.91974e-05	0.00022169	-1.29966	31.121	RAD53;CLN2;SIC1;CLB5;MCM7;DUN1;CLB2;PDS1;CDC28;FAR1	GO Biological Process AutoRIF
cytoplasmic_microtubule_organization_(GO:0031122)	9/166	4.19381e-11	2.60422e-10	1.44557e-05	8.83402e-05	-1.21739	29.0894	CDC20;MAD2;CLB5;DBF2;MCD1;PDS1;CDC28;CDC5;BUB1	GO Biological Process AutoRIF
maintenance_of_chromatin_silencing_(GO:0006344)	9/163	3.55972e-11	2.68462e-10	1.63511e-06	1.20798e-05	-1.41461	34.0337	HSL1;RAD53;CDC45;MRC1;SWI4;KCC4;MCM6;BUB1;MCM2	GO Biological Process AutoRIF predicted Zscore
regulation_of_helicase_activity_(GO:0051095)	9/166	4.19381e-11	3.09828e-10	1.89028e-06	1.35145e-05	-1.51799	36.2722	RAD53;CDC45;MRC1;SWI4;IRR1;MCM6;SMC3;BUB1;MCM2	GO Biological Process AutoRIF predicted Zscore
regulation_of_histone_deacetylation_(GO:0031063)	9/166	4.19381e-11	3.09828e-10	1.89028e-06	1.35145e-05	-1.38714	33.1455	MRC1;PDS1;SWI4;IRR1;MCM6;SMC3;BUB1;SMC1;MCM2	GO Biological Process AutoRIF predicted Zscore
DNA_strand_elongation_(GO:0022616)	8/108	4.57966e-11	3.34916e-10	8.45234e-07	6.99108e-06	-1.48866	35.4404	HSL1;CDC45;MRC1;SWI4;MCM6;BUB1;SMC1;MCM2	GO Biological Process AutoRIF predicted Zscore
protein_localization_to_chromatin_(GO:0071168)	8/111	5.71871e-11	3.52273e-10	6.51641e-06	4.44039e-05	-1.38074	32.5642	RAD53;CDC45;MCM3;SWI4;CDC28;SMC3;BUB1;MCM2	GO Biological Process AutoRIF
cellular_protein_complex_assembly_(GO:0043623)	9/173	6.0756e-11	3.71287e-10	1.98468e-05	0.000119391	-1.4511	34.1359	CDC20;RAD53;CLB5;CDC45;CLB2;CDC28;MCM5;BUB1;MCM2	GO Biological Process AutoRIF
telomere_localization_(GO:0034397)	8/112	6.14955e-11	4.45228e-10	1.09645e-06	8.18384e-06	-1.81666	42.7134	HSL1;MRC1;SWI4;MCM6;SMC3;BUB1;SMC1;MCM2	GO Biological Process AutoRIF predicted Zscore
double-strand_break_repair_via_nonhomologous_end_joining_(GO:0006303)	9/177	7.45637e-11	4.52079e-10	2.3637e-05	0.000140036	-1.33004	31.0157	CDC20;RAD53;DUN1;PDS1;MCM3;CDC28;SMC3;BUB1;SMC1	GO Biological Process AutoRIF
negative_regulation_of_hydrolase_activity_(GO:0051346)	11/349	7.72832e-11	4.64907e-10	0.000183272	0.000898849	-1.07627	25.0593	CDC20;MAD2;RAD53;DUN1;CLB2;MRC1;MCM3;CDC28;PHO5;CDC5;MCM1	GO Biological Process AutoRIF
DNA strand elongation (GO:0022616)	5/14	5.55336e-11	4.88696e-10	4.01911e-07	3.84437e-06	-1.66734	39.3726	MCM7;MCM3;MCM4;MCM6;MCM2	GO Biological Process 2018
anaphase-promoting_complex-dependent_catabolic_process_(GO:0031145)	5/15	8.31755e-11	4.96474e-10	5.63883e-07	4.66871e-06	-1.70886	39.6627	CDC20;SIC1;PDS1;CDC28;MCM1	GO Biological Process AutoRIF
DNA_recombination_(GO:0006310)	9/181	9.10697e-11	6.52817e-10	3.75069e-06	2.58619e-05	-1.47866	34.1858	MRC1;PDS1;SWI4;IRR1;MCM6;SMC3;BUB1;SMC1;MCM2	GO Biological Process AutoRIF predicted Zscore
regulation_of_chromosome_organization_(GO:0033044)	8/121	1.14833e-10	6.80166e-10	1.18829e-05	7.62489e-05	-1.44098	32.9804	RAD53;MCD1;CDC28;CDC5;SMC3;BUB1;MCM1;MCM2	GO Biological Process AutoRIF
size_of_nucleus	9/193	1.61535e-10	6.83419e-10	0.000340773	0.00133875	-1.3147	29.6417	SIC1;CLN2;CLB5;DUN1;CLB2;CDC28;SWI4;CDC5;BUB1	Phenotype AutoRIF
global_genome_nucleotide-excision_repair_(GO:0070911)	9/183	1.00471e-10	7.1315e-10	4.09042e-06	2.79384e-05	-1.17589	27.0703	RAD53;MRC1;SWI4;IRR1;MCM6;SMC3;BUB1;SMC1;MCM2	GO Biological Process AutoRIF predicted Zscore
proteolysis_(GO:0006508)	11/365	1.24624e-10	7.3252e-10	0.000269419	0.00126495	-1.26761	28.9087	CDC20;CLB6;SIC1;CLB5;CLB2;CLB1;PDS1;CDC28;CDC5;BUB1;MCM1	GO Biological Process AutoRIF
histone_H4_acetylation_(GO:0043967)	8/120	1.07399e-10	7.54921e-10	1.79459e-06	1.31241e-05	-1.31815	30.2573	MRC1;SWI4;IRR1;MCM6;SMC3;BUB1;SMC1;MCM2	GO Biological Process AutoRIF predicted Zscore
kinetochore_assembly_(GO:0051382)	8/121	1.14833e-10	7.99415e-10	1.90398e-06	1.35145e-05	-1.37455	31.46	CLB6;CLB5;MRC1;PDS1;SWI4;CDC5;BUB1;SMC1	GO Biological Process AutoRIF predicted Zscore
regulation_of_DNA_recombination_(GO:0000018)	9/186	1.1618e-10	8.01091e-10	4.64969e-06	3.06755e-05	-1.18361	27.0761	MRC1;PDS1;SWI4;IRR1;MCM6;SMC3;BUB1;SMC1;MCM2	GO Biological Process AutoRIF predicted Zscore
establishment_of_mitotic_sister_chromatid_cohesion_(GO:0034087)	5/17	1.70878e-10	9.96788e-10	9.45524e-07	7.28054e-06	-1.56965	35.3015	MCD1;IRR1;SMC3;BUB1;SMC1	GO Biological Process AutoRIF
mitotic_spindle_orientation_checkpoint_(GO:0031578)	8/125	1.49231e-10	1.01928e-09	2.40034e-06	1.68723e-05	-1.22734	27.7691	CDC20;CLB6;CLB5;CLB1;PDS1;SWI4;CDC5;BUB1	GO Biological Process AutoRIF predicted Zscore
mitotic_spindle_organization_(GO:0007052)	9/192	1.54226e-10	1.04355e-09	5.96849e-06	3.8582e-05	-1.21872	27.534	CDC20;CLB6;CLB5;MRC1;CLB1;PDS1;SWI4;CDC5;BUB1	GO Biological Process AutoRIF predicted Zscore
DNA_double-strand_break_processing_(GO:0000729)	8/127	1.69561e-10	1.13668e-09	2.68731e-06	1.87078e-05	-1.43966	32.3891	MRC1;SWI4;IRR1;MCM6;SMC3;BUB1;SMC1;MCM2	GO Biological Process AutoRIF predicted Zscore
regulation_of_DNA_recombination_(GO:0000018)	9/198	2.0286e-10	1.17445e-09	5.53067e-05	0.000306375	-1.24365	27.7565	RAD53;CLB5;CLB2;MCD1;CLB1;CDC28;IRR1;CDC5;SMC3	GO Biological Process AutoRIF
cell_cycle_progression_in_G1_phase	9/189	1.34017e-10	1.23052e-09	6.29447e-05	0.000529784	-1.72502	39.215	CDC20;RAD53;PDS1;MCM3;SWI4;MCM5;IRR1;MCM6;MCM2	Phenotype AutoRIF predicted Zscore
regulation_of_protein_complex_assembly_(GO:0043254)	9/200	2.21837e-10	1.24504e-09	8.2192e-06	4.34358e-05	-1.63753	36.4007	RAD53;CDC45;PDS1;SWI4;MCM5;IRR1;MCM6;SMC3;MCM2	GO Biological Process AutoRIF predicted Zscore
negative_regulation_of_mitotic_nuclear_division_(GO:0045839)	9/200	2.21837e-10	1.24504e-09	8.2192e-06	4.34358e-05	-1.63494	36.3432	RAD53;PDS1;SWI4;MCM5;IRR1;MCM6;CDC5;SMC3;MCM2	GO Biological Process AutoRIF predicted Zscore
negative_regulation_of_gene_silencing_(GO:0060969)	9/200	2.21837e-10	1.24504e-09	8.2192e-06	4.34358e-05	-1.61571	35.9158	RAD53;CDC45;MCM3;SWI4;IRR1;MCM6;SMC3;SMC1;MCM2	GO Biological Process AutoRIF predicted Zscore
N-terminal_peptidyl-methionine_acetylation_(GO:0017196)	9/200	2.21837e-10	1.24504e-09	8.2192e-06	4.34358e-05	-1.60247	35.6215	CDC45;MRC1;SWI4;IRR1;MCM6;SMC3;BUB1;SMC1;MCM2	GO Biological Process AutoRIF predicted Zscore
meiotic_recombination_checkpoint_(GO:0051598)	9/200	2.21837e-10	1.24504e-09	8.2192e-06	4.34358e-05	-1.5339	34.0971	CLB5;PDS1;SWI4;IRR1;CDC5;SMC3;BUB1;SMC1;MCM2	GO Biological Process AutoRIF predicted Zscore
microtubule_polymerization_(GO:0046785)	9/200	2.21837e-10	1.24504e-09	8.2192e-06	4.34358e-05	-1.52957	34.001	RAD53;CLB6;PDS1;SWI4;IRR1;MCM6;SMC3;SMC1;MCM2	GO Biological Process AutoRIF predicted Zscore
regulation_of_spindle_pole_body_separation_(GO:0010695)	9/200	2.21837e-10	1.24504e-09	8.2192e-06	4.34358e-05	-1.51522	33.682	CDC20;RAD53;CLB6;CLB1;PDS1;SWI4;IRR1;CDC5;MCM2	GO Biological Process AutoRIF predicted Zscore
septin_ring_organization_(GO:0031106)	9/200	2.21837e-10	1.24504e-09	8.2192e-06	4.34358e-05	-1.48743	33.0643	CDC20;RAD53;CLB6;CLB5;CLB1;PDS1;SWI4;MCM6;CDC5	GO Biological Process AutoRIF predicted Zscore
actomyosin_contractile_ring_assembly_(GO:0000915)	9/200	2.21837e-10	1.24504e-09	8.2192e-06	4.34358e-05	-1.47975	32.8935	CDC20;RAD53;CLB6;CLB1;SWI5;PDS1;SWI4;MCM5;CDC5	GO Biological Process AutoRIF predicted Zscore
cellular_protein_localization_(GO:0034613)	9/200	2.21837e-10	1.24504e-09	8.2192e-06	4.34358e-05	-1.46097	32.4761	CDC20;RAD53;PDS1;MCM3;SWI4;MCM5;IRR1;MCM6;MCM2	GO Biological Process AutoRIF predicted Zscore
establishment_or_maintenance_of_actin_cytoskeleton_polarity_(GO:0030950)	9/200	2.21837e-10	1.24504e-09	8.2192e-06	4.34358e-05	-1.43481	31.8945	CDC20;CLB6;PDS1;SWI4;IRR1;MCM6;CDC5;SMC1;MCM2	GO Biological Process AutoRIF predicted Zscore
protein_localization_to_cell_periphery_(GO:1990778)	9/200	2.21837e-10	1.24504e-09	8.2192e-06	4.34358e-05	-1.41925	31.5486	RAD53;MCM7;CLB2;MCM3;SWI4;MCM4;MCM5;MCM6;MCM2	GO Biological Process AutoRIF predicted Zscore
antisense_RNA_transcript_catabolic_process_(GO:0071041)	9/200	2.21837e-10	1.24504e-09	8.2192e-06	4.34358e-05	-1.40217	31.1689	RAD53;MRC1;SWI4;IRR1;MCM6;SMC3;BUB1;SMC1;MCM2	GO Biological Process AutoRIF predicted Zscore
negative_regulation_of_microtubule_polymerization_or_depolymerization_(GO:0031111)	9/200	2.21837e-10	1.24504e-09	8.2192e-06	4.34358e-05	-1.38743	30.8412	RAD53;CLB6;PDS1;SWI4;IRR1;MCM6;SMC3;SMC1;MCM2	GO Biological Process AutoRIF predicted Zscore
regulation_of_cell_cycle_process_(GO:0010564)	9/200	2.21837e-10	1.24504e-09	8.2192e-06	4.34358e-05	-1.38175	30.715	RAD53;PDS1;MCM3;SWI4;IRR1;MCM6;SMC3;SMC1;MCM2	GO Biological Process AutoRIF predicted Zscore
G2/M_transition_of_mitotic_cell_cycle_(GO:0000086)	9/200	2.21837e-10	1.24504e-09	8.2192e-06	4.34358e-05	-1.35727	30.1709	CDC20;RAD53;CLB6;PDS1;SWI4;MCM5;IRR1;MCM6;MCM2	GO Biological Process AutoRIF predicted Zscore
regulation_of_exit_from_mitosis_(GO:0007096)	9/200	2.21837e-10	1.24504e-09	8.2192e-06	4.34358e-05	-1.35199	30.0535	CDC20;RAD53;CLB6;PDS1;SWI4;IRR1;MCM6;CDC5;MCM2	GO Biological Process AutoRIF predicted Zscore
positive_regulation_of_microtubule_polymerization_or_depolymerization_(GO:0031112)	9/200	2.21837e-10	1.24504e-09	8.2192e-06	4.34358e-05	-1.34093	29.8077	RAD53;CLB6;PDS1;SWI4;IRR1;MCM6;SMC3;SMC1;MCM2	GO Biological Process AutoRIF predicted Zscore
mitotic_cytokinesis_(GO:0000281)	9/200	2.21837e-10	1.24504e-09	8.2192e-06	4.34358e-05	-1.29239	28.7287	CDC20;RAD53;CLB6;CLB1;PDS1;SWI4;MCM6;CDC5;MCM2	GO Biological Process AutoRIF predicted Zscore
regulation_of_cell_proliferation_(GO:0042127)	9/200	2.21837e-10	1.24504e-09	8.2192e-06	4.34358e-05	-1.22217	27.1678	HSL1;MRC1;SWI4;IRR1;MCM6;SMC3;BUB1;SMC1;MCM2	GO Biological Process AutoRIF predicted Zscore
nuclear_division_(GO:0000280)	9/200	2.21837e-10	1.24504e-09	8.2192e-06	4.34358e-05	-1.18143	26.2621	CDC20;CLB5;PDS1;SWI4;IRR1;CDC5;SMC3;BUB1;SMC1	GO Biological Process AutoRIF predicted Zscore
G1/S transition of mitotic cell cycle (GO:0000082)	6/40	1.84635e-10	1.56229e-09	2.08704e-06	1.76595e-05	-1.44072	32.2904	CLB6;SIC1;CLB5;PCL9;SWI5;CDC28	GO Biological Process 2018
negative_regulation_of_DNA_recombination_(GO:0045910)	8/135	2.76916e-10	1.59123e-09	2.53323e-05	0.000147772	-1.10197	24.2514	CLB5;DUN1;DBF2;SWI5;MCM3;CDC28;PHO5;CDC5	GO Biological Process AutoRIF
nucleus_organization_(GO:0006997)	8/136	2.9379e-10	1.63618e-09	4.36912e-06	2.92893e-05	-1.3324	29.2438	MRC1;SWI4;IRR1;MCM6;SMC3;BUB1;SMC1;MCM2	GO Biological Process AutoRIF predicted Zscore
sister_chromatid_segregation_(GO:0000819)	8/138	3.30236e-10	1.82512e-09	4.84498e-06	3.16015e-05	-1.36932	29.894	CLB5;MRC1;PDS1;SWI4;IRR1;SMC3;BUB1;SMC1	GO Biological Process AutoRIF predicted Zscore
meiotic_recombination	9/200	2.21837e-10	1.86713e-09	9.65115e-05	0.00074982	-1.53538	34.1302	MRC1;PDS1;SWI4;IRR1;MCM6;SMC3;BUB1;SMC1;MCM2	Phenotype AutoRIF predicted Zscore
spindle_disassembly_(GO:0051230)	7/84	3.57858e-10	2.04112e-09	1.09056e-05	7.05653e-05	-1.54765	33.6629	CDC20;CLB6;CLB2;PDS1;CDC28;CDC5;BUB1	GO Biological Process AutoRIF
regulation_of_establishment_or_maintenance_of_cell_polarity_(GO:0032878)	9/213	3.88059e-10	2.1971e-09	9.55329e-05	0.000493694	-1.33324	28.8912	CLN2;CLB5;CLB2;MCD1;CDC28;IRR1;SMC3;SMC1;MCM1	GO Biological Process AutoRIF
DNA_amplification_(GO:0006277)	8/143	4.39011e-10	2.40791e-09	6.23129e-06	3.99244e-05	-1.55308	33.4634	RAD53;CDC45;MCM3;SWI4;IRR1;MCM6;SMC3;MCM2	GO Biological Process AutoRIF predicted Zscore
DNA metabolic process (GO:0006259)	9/207	3.01167e-10	2.45395e-09	7.05585e-05	0.000443511	-1.79974	39.4563	RAD53;CDC45;MCM7;MRC1;MCM3;CDC28;MCM4;MCM5;MCM1	GO Biological Process 2018
protein_autophosphorylation_(GO:0046777)	8/144	4.64151e-10	2.58983e-09	3.94435e-05	0.00022169	-1.41557	30.4218	CDC20;RAD53;SIC1;DUN1;DBF2;CDC28;MCM5;MCM1	GO Biological Process AutoRIF
cellular_response_to_alkaline_pH_(GO:0071469)	8/144	4.64151e-10	2.58983e-09	3.94435e-05	0.00022169	-1.18842	25.5402	RAD53;DUN1;PCL9;CDC28;PCL2;PCL1;MCM1;MCM2	GO Biological Process AutoRIF
regulation of mitotic cell cycle (GO:0007346)	6/44	3.37522e-10	2.65196e-09	3.4515e-06	2.81234e-05	-1.51677	33.0799	CLB6;CLN2;CLB5;CLB2;CLB1;CDC28	GO Biological Process 2018
cell_cycle_progression	8/139	3.49887e-10	2.71835e-09	4.96725e-05	0.000456084	-1.49154	32.476	RAD53;SWI4;IRR1;MCM6;SMC3;BUB1;SMC1;MCM2	Phenotype AutoRIF predicted Zscore
regulation_of_double-strand_break_repair_via_nonhomologous_end_joining_(GO:2001032)	8/146	5.18203e-10	2.8209e-09	7.21457e-06	4.34358e-05	-1.36508	29.1863	MRC1;SWI4;IRR1;MCM6;SMC3;BUB1;SMC1;MCM2	GO Biological Process AutoRIF predicted Zscore
positive regulation of cytoskeleton organization (GO:0051495)	5/20	4.2621e-10	3.23331e-09	1.76764e-06	1.55552e-05	-1.50346	32.4387	CLB5;CLB2;CLB1;CDC28;CDC5	GO Biological Process 2018
protein_complex_assembly_(GO:0006461)	8/151	6.77871e-10	3.75511e-09	5.45262e-05	0.000304241	-1.54327	32.5817	CDC20;CDC45;CLB2;SWI5;CDC28;MCM5;BUB1;MCM2	GO Biological Process AutoRIF
DNA_conformation_change_(GO:0071103)	8/152	7.14477e-10	3.92962e-09	5.70301e-05	0.000313665	-1.42699	30.0516	CDC45;CLB2;SWI5;CDC28;MCM4;MCM5;MCM1;MCM2	GO Biological Process AutoRIF
double-strand_break_repair_via_nonhomologous_end_joining_(GO:0006303)	7/94	7.96747e-10	4.30481e-09	4.36223e-06	2.92893e-05	-1.32096	27.6747	HSL1;MRC1;SWI4;GIN4;IRR1;BUB1;SMC1	GO Biological Process AutoRIF predicted Zscore
chromatin_silencing_at_telomere_(GO:0006348)	7/95	8.58843e-10	4.60594e-09	4.66065e-06	3.06755e-05	-1.40037	29.2333	HSL1;MRC1;SWI4;GIN4;MCM6;BUB1;MCM2	GO Biological Process AutoRIF predicted Zscore
dephosphorylation_(GO:0016311)	8/160	1.07451e-09	5.82658e-09	8.07455e-05	0.000422953	-1.16657	24.0913	CDC20;RAD53;CLB5;DUN1;DBF2;CLB2;PDS1;CDC28	GO Biological Process AutoRIF
peptidyl-serine_dephosphorylation_(GO:0070262)	8/160	1.07451e-09	5.82658e-09	8.07455e-05	0.000422953	-1.12759	23.2863	CDC20;RAD53;CLB5;DUN1;DBF2;CLB2;PDS1;CDC28	GO Biological Process AutoRIF
telomere_organization_(GO:0032200)	8/161	1.12903e-09	6.01042e-09	1.43431e-05	7.41745e-05	-1.35867	27.9912	MRC1;SWI4;IRR1;MCM6;SMC3;BUB1;SMC1;MCM2	GO Biological Process AutoRIF predicted Zscore
regulation of cell cycle (GO:0051726)	6/51	8.52097e-10	6.24871e-09	7.53789e-06	5.52779e-05	-1.4124	29.4957	HSL1;CLB6;CLN2;CLB5;CLB2;CLB1	GO Biological Process 2018
regulation_of_protein_complex_disassembly_(GO:0043244)	8/162	1.18593e-09	6.26726e-09	1.49782e-05	7.69096e-05	-1.38117	28.3869	RAD53;SWI4;IRR1;MCM6;SMC3;BUB1;SMC1;MCM2	GO Biological Process AutoRIF predicted Zscore
positive_regulation_of_histone_acetylation_(GO:0035066)	7/100	1.23491e-09	6.47878e-09	6.4209e-06	4.07784e-05	-1.3605	27.907	CLB5;CDC45;MRC1;PDS1;SWI4;BUB1;SMC1	GO Biological Process AutoRIF predicted Zscore
centromere_complex_assembly_(GO:0034508)	8/163	1.2453e-09	6.48633e-09	1.5637e-05	7.97265e-05	-1.30887	26.8369	CLB5;MRC1;PDS1;SWI4;IRR1;SMC3;BUB1;SMC1	GO Biological Process AutoRIF predicted Zscore
mating_type_switching	8/157	9.2442e-10	6.66903e-09	0.000113905	0.000766962	-1.62049	33.7092	RAD53;SWI4;IRR1;MCM6;SMC3;BUB1;SMC1;MCM2	Phenotype AutoRIF predicted Zscore
subcellular_morphology	9/253	1.77112e-09	7.21567e-09	0.00223992	0.0074664	-0.948212	19.108	MAD2;DUN1;CLB2;SWI5;MCM3;CDC28;MCM4;FAR1;CDC5	Phenotype AutoRIF
DNA_strand_elongation_involved_in_DNA_replication_(GO:0006271)	7/103	1.52169e-09	7.8693e-09	7.72078e-06	4.34358e-05	-1.51546	30.769	HSL1;MRC1;SWI4;GIN4;MCM6;BUB1;SMC1	GO Biological Process AutoRIF predicted Zscore
DNA_recombinase_assembly_(GO:0000730)	8/169	1.65866e-09	8.5168e-09	2.01254e-05	0.000101186	-1.5733	31.8078	CLB5;MRC1;PDS1;SWI4;IRR1;SMC3;BUB1;SMC1	GO Biological Process AutoRIF predicted Zscore
meiotic_recombination	7/110	2.41854e-09	9.5014e-09	0.000291771	0.0011887	-1.0911	21.6475	RAD53;CLB6;CLB5;MCD1;CLB1;CDC28;SMC3	Phenotype AutoRIF
positive regulation of cell cycle process (GO:0090068)	5/25	1.44964e-09	1.02877e-08	4.5928e-06	3.60863e-05	-1.68254	34.243	CLB5;CLB2;CLB1;CDC28;CDC5	GO Biological Process 2018
lagging_strand_elongation_(GO:0006273)	7/109	2.26801e-09	1.15637e-08	1.09834e-05	5.76228e-05	-1.22584	24.3995	HSL1;MRC1;SWI4;GIN4;MCM6;BUB1;SMC1	GO Biological Process AutoRIF predicted Zscore
positive_regulation_of_chromosome_segregation_(GO:0051984)	5/27	2.19609e-09	1.18251e-08	6.77984e-06	4.57937e-05	-1.47623	29.4311	CDC20;CLB5;PDS1;CDC5;BUB1	GO Biological Process AutoRIF
regulation_of_protein_complex_disassembly_(GO:0043244)	9/260	2.25014e-09	1.2032e-08	0.000410634	0.00184906	-1.33716	26.6259	RAD53;CDC45;MCM7;CLB2;MRC1;SWI4;CDC28;SMC3;MCM2	GO Biological Process AutoRIF
regulation_of_chromatin_silencing_at_telomere_(GO:0031938)	7/110	2.41854e-09	1.22449e-08	1.16248e-05	6.05495e-05	-1.50538	29.867	HSL1;MRC1;SWI4;GIN4;MCM6;BUB1;SMC1	GO Biological Process AutoRIF predicted Zscore
nuclear_fusion_during_mating	8/172	1.90661e-09	1.28379e-08	0.000210458	0.00132852	-1.45861	29.2859	RAD53;PDS1;MCM3;SWI4;MCM5;IRR1;MCM6;MCM2	Phenotype AutoRIF predicted Zscore
DNA strand elongation involved in DNA replication (GO:0006271)	5/27	2.19609e-09	1.50981e-08	6.40809e-06	4.86131e-05	-1.72236	34.3381	MCM7;MCM3;MCM4;MCM6;MCM2	GO Biological Process 2018
regulation_of_protein_export_from_nucleus_(GO:0046825)	7/113	2.92213e-09	1.55175e-08	6.65074e-05	0.000360639	-1.2925	25.3988	RAD53;CLN2;CLB2;SWI5;SWI4;CDC28;IRR1	GO Biological Process AutoRIF
bipolar_budding_pattern	6/66	4.20308e-09	1.59427e-08	0.00013598	0.000598314	-1.27694	24.629	MAD2;PCL9;CLB2;SWI5;PCL2;PCL1	Phenotype AutoRIF
negative_regulation_of_protein_kinase_activity_(GO:0006469)	7/114	3.10866e-09	1.6395e-08	7.0138e-05	0.000375043	-1.22894	24.0739	CDC20;CLB5;CLB2;CDC28;FAR1;PHO5;CDC5	GO Biological Process AutoRIF
telomere_length	7/114	3.10866e-09	1.84861e-08	0.000110445	0.000766962	-1.34353	26.3185	HSL1;MRC1;SWI4;MCM6;BUB1;SMC1;MCM2	Phenotype AutoRIF predicted Zscore
colony_sectoring	8/183	3.11151e-09	1.84861e-08	0.000317947	0.00188898	-1.32355	25.9258	RAD53;MCM3;SWI4;MCM4;MCM5;IRR1;MCM6;MCM2	Phenotype AutoRIF predicted Zscore
proteolysis_involved_in_cellular_protein_catabolic_process_(GO:0051603)	9/274	3.56048e-09	1.86501e-08	0.000596868	0.00253916	-1.20092	23.3619	CDC20;RAD53;SIC1;CLB2;MCD1;PDS1;CDC28;FAR1;MCM2	GO Biological Process AutoRIF
IMP_biosynthetic_process_(GO:0006188)	7/117	3.73016e-09	1.94069e-08	8.20171e-05	0.000426711	-1.27873	24.816	RAD53;PDS1;CDC28;CDC5;SMC3;SMC1;MCM1	GO Biological Process AutoRIF
regulation_of_meiotic_DNA_double-strand_break_formation_(GO:1903341)	6/66	4.20308e-09	2.17206e-08	3.14785e-05	0.000182244	-1.41825	27.3545	CLB5;MCD1;PDS1;IRR1;CDC5;SMC3	GO Biological Process AutoRIF
regulation_of_cell_proliferation_(GO:0042127)	5/31	4.59439e-09	2.35845e-08	1.23699e-05	7.80068e-05	-1.46649	28.1543	RAD53;SIC1;MOB1;CLB2;CDC28	GO Biological Process AutoRIF
histone_H3-K4_methylation_(GO:0051568)	8/194	4.9272e-09	2.47729e-08	5.22965e-05	0.000249096	-1.06779	20.4253	HSL1;CDC45;MRC1;MCD1;GIN4;KCC4;MCM6;MCM2	GO Biological Process AutoRIF predicted Zscore
cellular_protein_localization_(GO:0034613)	10/393	4.98801e-09	2.54356e-08	0.00196089	0.00718992	-1.04084	19.897	RAD53;CDC45;CLB2;SWI4;CDC28;GIN4;IRR1;CDC5;BUB1;MCM2	GO Biological Process AutoRIF
protein_complex_localization_(GO:0031503)	7/123	5.29442e-09	2.68204e-08	0.000110733	0.000560952	-1.52675	29.0947	CDC20;CLB2;SWI5;CDC28;CDC5;BUB1;MCM2	GO Biological Process AutoRIF
spindle_assembly_(GO:0051225)	8/200	6.25908e-09	2.76316e-08	6.44468e-05	0.000271276	-1.54187	29.1247	CDC20;CLB6;CLB5;CLB1;PDS1;SWI4;IRR1;CDC5	GO Biological Process AutoRIF predicted Zscore
cell_septum_assembly_(GO:0090529)	8/200	6.25908e-09	2.76316e-08	6.44468e-05	0.000271276	-1.48884	28.123	CDC20;RAD53;CLB6;DBF2;CLB1;SWI5;PDS1;MCM5	GO Biological Process AutoRIF predicted Zscore
regulation_of_mitotic_recombination_(GO:0000019)	8/200	6.25908e-09	2.76316e-08	6.44468e-05	0.000271276	-1.47791	27.9166	RAD53;PDS1;SWI4;IRR1;MCM6;SMC3;SMC1;MCM2	GO Biological Process AutoRIF predicted Zscore
establishment_of_mitotic_spindle_localization_(GO:0040001)	8/200	6.25908e-09	2.76316e-08	6.44468e-05	0.000271276	-1.42689	26.9529	MRC1;PDS1;SWI4;IRR1;MCM6;SMC3;SMC1;MCM2	GO Biological Process AutoRIF predicted Zscore
tubulin_complex_assembly_(GO:0007021)	8/200	6.25908e-09	2.76316e-08	6.44468e-05	0.000271276	-1.40332	26.5076	CDC20;CLB6;CLB5;SPO12;CLB1;PDS1;SWI4;CDC5	GO Biological Process AutoRIF predicted Zscore
nucleus_localization_(GO:0051647)	8/200	6.25908e-09	2.76316e-08	6.44468e-05	0.000271276	-1.38345	26.1323	RAD53;MCM3;SWI4;MCM4;IRR1;MCM6;SMC3;MCM2	GO Biological Process AutoRIF predicted Zscore
cellular_protein_catabolic_process_(GO:0044257)	8/200	6.25908e-09	2.76316e-08	6.44468e-05	0.000271276	-1.36525	25.7885	RAD53;MCM3;SWI4;MCM4;MCM5;IRR1;MCM6;MCM2	GO Biological Process AutoRIF predicted Zscore
cellular_protein_metabolic_process_(GO:0044267)	8/200	6.25908e-09	2.76316e-08	6.44468e-05	0.000271276	-1.34639	25.4323	RAD53;MCM3;SWI4;MCM4;MCM5;IRR1;MCM6;MCM2	GO Biological Process AutoRIF predicted Zscore
septin_ring_assembly_(GO:0000921)	8/198	5.78421e-09	2.76316e-08	6.0159e-05	0.000271276	-1.33131	25.2525	CDC20;RAD53;CLB6;SWI5;PDS1;SWI4;MCM6;MCM2	GO Biological Process AutoRIF predicted Zscore
protein_localization_to_nucleus_(GO:0034504)	8/200	6.25908e-09	2.76316e-08	6.44468e-05	0.000271276	-1.33547	25.226	RAD53;MCM3;SWI4;MCM4;IRR1;MCM6;SMC3;MCM2	GO Biological Process AutoRIF predicted Zscore
regulation_of_spindle_assembly_(GO:0090169)	8/200	6.25908e-09	2.76316e-08	6.44468e-05	0.000271276	-1.31897	24.9144	CDC20;CLB6;CLB5;CLB1;PDS1;SWI4;IRR1;CDC5	GO Biological Process AutoRIF predicted Zscore
mitotic_cell_cycle_phase_transition_(GO:0044772)	8/200	6.25908e-09	2.76316e-08	6.44468e-05	0.000271276	-1.2772	24.1253	CDC20;RAD53;CLB6;PDS1;SWI4;IRR1;MCM6;MCM2	GO Biological Process AutoRIF predicted Zscore
cellular_protein_complex_assembly_(GO:0043623)	8/200	6.25908e-09	2.76316e-08	6.44468e-05	0.000271276	-1.25534	23.7123	RAD53;CDC45;SWI4;IRR1;MCM6;SMC3;SMC1;MCM2	GO Biological Process AutoRIF predicted Zscore
regulation_of_cell_division_(GO:0051302)	8/200	6.25908e-09	2.76316e-08	6.44468e-05	0.000271276	-1.24914	23.5952	PDS1;SWI4;IRR1;MCM6;SMC3;BUB1;SMC1;MCM2	GO Biological Process AutoRIF predicted Zscore
nuclear_pore_organization_(GO:0006999)	8/200	6.25908e-09	2.76316e-08	6.44468e-05	0.000271276	-1.2209	23.0619	RAD53;MCM7;CLB2;MCM3;SWI4;MCM4;MCM6;MCM2	GO Biological Process AutoRIF predicted Zscore
double-strand_break_repair_via_break-induced_replication_(GO:0000727)	8/200	6.25908e-09	2.76316e-08	6.44468e-05	0.000271276	-1.18842	22.4483	RAD53;CDC45;MCM3;SWI4;IRR1;MCM6;SMC3;MCM2	GO Biological Process AutoRIF predicted Zscore
positive_regulation_of_protein_complex_assembly_(GO:0031334)	8/200	6.25908e-09	2.76316e-08	6.44468e-05	0.000271276	-1.17941	22.2782	RAD53;MCM3;SWI4;IRR1;MCM6;SMC3;SMC1;MCM2	GO Biological Process AutoRIF predicted Zscore
protein_depolymerization_(GO:0051261)	8/200	6.25908e-09	2.76316e-08	6.44468e-05	0.000271276	-1.16527	22.0111	RAD53;PDS1;SWI4;IRR1;MCM6;SMC3;SMC1;MCM2	GO Biological Process AutoRIF predicted Zscore
cellular_response_to_DNA_damage_stimulus_(GO:0006974)	8/200	6.25908e-09	2.76316e-08	6.44468e-05	0.000271276	-1.13614	21.4609	RAD53;MCM7;MCM3;SWI4;MCM4;IRR1;MCM6;MCM2	GO Biological Process AutoRIF predicted Zscore
negative_regulation_of_mitotic_cell_cycle_phase_transition_(GO:1901991)	8/200	6.25908e-09	2.76316e-08	6.44468e-05	0.000271276	-1.04091	19.662	CDC20;RAD53;CLB6;PDS1;SWI4;IRR1;MCM6;MCM2	GO Biological Process AutoRIF predicted Zscore
cellular_response_to_amino_acid_starvation_(GO:0034198)	9/289	5.66744e-09	2.85224e-08	0.000868813	0.00353961	-1.16217	22.0679	HSL1;RAD53;PCL9;DBF2;CLB2;CDC28;PHO5;PCL2;PCL1	GO Biological Process AutoRIF
negative_regulation_of_chromatin_silencing_(GO:0031936)	7/127	6.62117e-09	2.90529e-08	2.82903e-05	0.000140289	-1.19273	22.4626	HSL1;CDC45;MRC1;SWI4;MCM6;BUB1;MCM2	GO Biological Process AutoRIF predicted Zscore
negative_regulation_of_kinase_activity_(GO:0033673)	7/128	6.99377e-09	3.47432e-08	0.000140508	0.000702538	-1.15924	21.7685	CDC20;CLB5;CLB2;CDC28;FAR1;PHO5;CDC5	GO Biological Process AutoRIF
positive_regulation_of_DNA_metabolic_process_(GO:0051054)	9/296	6.97936e-09	3.47432e-08	0.0010267	0.00413905	-1.0709	20.1119	RAD53;CLB5;DUN1;CLB2;SWI4;CDC28;CDC5;SMC3;MCM1	GO Biological Process AutoRIF
aneuploidy	8/200	6.25908e-09	3.51204e-08	0.000570214	0.00319953	-1.49649	28.2676	RAD53;PDS1;SWI4;IRR1;MCM6;SMC3;SMC1;MCM2	Phenotype AutoRIF predicted Zscore
regulation_of_histone_acetylation_(GO:0035065)	7/133	9.1355e-09	3.9844e-08	3.75789e-05	0.000183832	-1.18187	21.8778	MRC1;SWI4;IRR1;MCM6;BUB1;SMC1;MCM2	GO Biological Process AutoRIF predicted Zscore
response_to_ionizing_radiation_(GO:0010212)	7/135	1.01359e-08	4.36807e-08	4.11834e-05	0.000198779	-1.3179	24.2588	MRC1;SWI4;IRR1;MCM6;SMC3;BUB1;SMC1	GO Biological Process AutoRIF predicted Zscore
double-strand_break_repair_(GO:0006302)	7/135	1.01359e-08	4.36807e-08	4.11834e-05	0.000198779	-1.31337	24.1755	MRC1;SWI4;GIN4;IRR1;SMC3;BUB1;SMC1	GO Biological Process AutoRIF predicted Zscore
mitotic sister chromatid segregation (GO:0000070)	6/71	6.57564e-09	4.38376e-08	4.3351e-05	0.000289007	-1.31457	24.7663	MRC1;MCD1;PDS1;IRR1;SMC3;SMC1	GO Biological Process 2018
tubulin_complex_assembly_(GO:0007021)	6/75	9.18965e-09	4.53592e-08	6.16961e-05	0.000336922	-1.31206	24.2798	CDC20;SIC1;CLB5;CLB2;PDS1;CDC28	GO Biological Process AutoRIF
mating_type_switching	7/139	1.24177e-08	4.55316e-08	0.00111754	0.00396546	-1.01734	18.5198	RAD53;CDC45;SWI5;CDC28;SWI4;PCL1;MCM1	Phenotype AutoRIF
cell_wall_chitin_biosynthetic_process_(GO:0006038)	9/307	9.58111e-09	4.66928e-08	0.00132171	0.00501337	-1.21474	22.4284	RAD53;DUN1;DBF2;MRC1;SWI4;CDC28;PCL2;PCL1;MCM1	GO Biological Process AutoRIF
cell_wall_chitin_metabolic_process_(GO:0006037)	9/307	9.58111e-09	4.66928e-08	0.00132171	0.00501337	-1.2111	22.3612	RAD53;DUN1;DBF2;MRC1;SWI4;CDC28;PCL2;PCL1;MCM1	GO Biological Process AutoRIF
recombinational_repair_(GO:0000725)	6/78	1.16695e-08	4.99923e-08	1.92814e-05	9.76206e-05	-1.2982	23.7133	HSL1;MRC1;SWI4;GIN4;BUB1;SMC1	GO Biological Process AutoRIF predicted Zscore
double-strand_break_repair_via_homologous_recombination_(GO:0000724)	6/79	1.26096e-08	5.37022e-08	2.0643e-05	0.000103072	-1.38163	25.1302	HSL1;MRC1;SWI4;GIN4;BUB1;SMC1	GO Biological Process AutoRIF predicted Zscore
centromere_complex_assembly_(GO:0034508)	7/139	1.24177e-08	6.01361e-08	0.00022923	0.00111011	-1.32775	24.1705	CDC20;MAD2;SIC1;MCD1;CDC28;SMC3;BUB1	GO Biological Process AutoRIF
regulation_of_protein_dephosphorylation_(GO:0035304)	7/140	1.30518e-08	6.28117e-08	0.000239144	0.00115088	-1.33056	24.1554	CDC20;RAD53;CLB5;DBF2;CLB2;SWI4;CDC28	GO Biological Process AutoRIF
peptide_biosynthetic_process_(GO:0043043)	10/436	1.34011e-08	6.40924e-08	0.00415073	0.0131525	-1.10531	20.037	RAD53;CLN2;CDC45;MCM7;DUN1;CLB2;CDC28;MCM5;BUB1;MCM2	GO Biological Process AutoRIF
regulation_of_dephosphorylation_(GO:0035303)	7/141	1.37131e-08	6.51796e-08	0.000249402	0.00118543	-1.24267	22.4984	CDC20;RAD53;CLB5;DBF2;CLB2;SWI4;CDC28	GO Biological Process AutoRIF
cell_wall_morphology	8/230	1.8663e-08	6.62234e-08	0.00466846	0.0138792	-1.01138	17.9992	CDC20;HSL1;SIC1;DBF2;CLB2;SWI5;CDC28;SWI4	Phenotype AutoRIF
chitin_biosynthetic_process_(GO:0006031)	9/322	1.44814e-08	6.79919e-08	0.00183184	0.00678133	-1.14216	20.6165	RAD53;DUN1;DBF2;MRC1;CDC28;GIN4;CDC5;PCL2;PCL1	GO Biological Process AutoRIF
chitin_metabolic_process_(GO:0006030)	9/322	1.44814e-08	6.79919e-08	0.00183184	0.00678133	-1.13971	20.5722	RAD53;DUN1;DBF2;MRC1;CDC28;GIN4;CDC5;PCL2;PCL1	GO Biological Process AutoRIF
protein-DNA_complex_disassembly_(GO:0032986)	8/223	1.46686e-08	6.84535e-08	0.000721353	0.00298624	-1.1712	21.1255	RAD53;CDC45;MCM7;MRC1;SWI4;CDC28;MCM5;MCM2	GO Biological Process AutoRIF
regulation_of_protein_serine/threonine_kinase_activity_(GO:0071900)	6/82	1.58134e-08	7.33515e-08	9.84691e-05	0.000505475	-1.3607	24.4414	RAD53;DBF2;CLB2;CDC28;GIN4;MCM5	GO Biological Process AutoRIF
histone_ubiquitination_(GO:0016574)	6/84	1.83018e-08	7.70663e-08	2.86657e-05	0.000141184	-1.39765	24.9009	MRC1;SWI4;MCM6;BUB1;SMC1;MCM2	GO Biological Process AutoRIF predicted Zscore
nucleosome_positioning_(GO:0016584)	7/147	1.83086e-08	7.70663e-08	6.93019e-05	0.000286712	-1.2294	21.9029	RAD53;MRC1;SWI4;IRR1;MCM6;BUB1;MCM2	GO Biological Process AutoRIF predicted Zscore
regulation_of_phosphatase_activity_(GO:0010921)	7/146	1.74628e-08	8.05171e-08	0.000306172	0.0014288	-1.31587	23.5057	CDC20;RAD53;DBF2;CLB2;CDC28;PHO5;CDC5	GO Biological Process AutoRIF
cellular_protein_complex_disassembly_(GO:0043624)	7/148	1.91888e-08	8.79488e-08	0.000331613	0.001529	-1.3097	23.272	CDC20;RAD53;CDC45;MCM7;CLB2;CDC5;MCM2	GO Biological Process AutoRIF
cytokinesis,_site_selection_(GO:0007105)	6/86	2.11051e-08	9.61595e-08	0.00012626	0.000635426	-1.20003	21.209	HSL1;RAD53;DBF2;CLB2;CLB1;CDC28	GO Biological Process AutoRIF
lysine_biosynthetic_process_(GO:0009085)	7/152	2.3078e-08	9.65806e-08	8.49288e-05	0.000347392	-1.16128	20.4204	RAD53;CDC45;SWI4;IRR1;MCM6;SMC3;MCM2	GO Biological Process AutoRIF predicted Zscore
protein_localization_to_nuclear_envelope_(GO:0090435)	8/237	2.35641e-08	1.06731e-07	0.00106289	0.00421868	-1.08898	19.1263	CDC45;YOX1;MCM3;CDC28;FAR1;CDC5;BUB1;MCM2	GO Biological Process AutoRIF
mitotic sister chromatid cohesion (GO:0007064)	5/40	1.75537e-08	1.13583e-07	3.57938e-05	0.000246082	-1.76141	31.4553	MRC1;MCD1;IRR1;SMC3;SMC1	GO Biological Process 2018
heteroduplex_formation_(GO:0030491)	7/157	2.88611e-08	1.20089e-07	0.000103332	0.000420294	-1.35304	23.4898	MRC1;PDS1;SWI4;IRR1;SMC3;BUB1;SMC1	GO Biological Process AutoRIF predicted Zscore
protein_ubiquitination_(GO:0016567)	7/156	2.76155e-08	1.24058e-07	0.000450979	0.00198431	-1.17898	20.52	CDC20;RAD53;CDC45;MCM7;CLB2;MRC1;CDC28	GO Biological Process AutoRIF
organelle_inheritance_(GO:0048308)	8/242	2.77116e-08	1.24058e-07	0.00121253	0.00471541	-1.13059	19.6738	RAD53;MOB1;DBF2;CDC28;MCM5;MCM6;CDC5;MCM2	GO Biological Process AutoRIF
activation_of_protein_kinase_activity_(GO:0032147)	7/157	2.88611e-08	1.28457e-07	0.000468053	0.00203616	-1.16318	20.1938	CDC20;RAD53;DUN1;CLB2;CDC28;FAR1;CDC5	GO Biological Process AutoRIF
macromolecular_complex_assembly_(GO:0065003)	9/350	2.97143e-08	1.31494e-07	0.00320511	0.0106376	-1.1194	19.4011	CDC45;MCM7;MRC1;SWI5;MCM3;CDC28;SMC3;BUB1;MCM2	GO Biological Process AutoRIF
nuclear_position	9/363	4.06362e-08	1.39687e-07	0.0216861	0.0530106	-0.716183	12.1884	MAD2;RAD53;CDC45;DUN1;PDS1;CDC28;SMC3;BUB1;MCM2	Phenotype AutoRIF
peptidyl-serine_phosphorylation_(GO:0018105)	7/162	3.58278e-08	1.56747e-07	0.000561378	0.00240145	-1.13114	19.3929	RAD53;DUN1;MCM3;CDC28;CDC5;SMC3;MCM2	GO Biological Process AutoRIF
phosphorylation_(GO:0016310)	7/162	3.58278e-08	1.56747e-07	0.000561378	0.00240145	-1.12109	19.2206	RAD53;DUN1;MCM3;CDC28;CDC5;SMC3;MCM2	GO Biological Process AutoRIF
establishment_of_protein_localization_to_chromosome_(GO:0070199)	5/46	3.62397e-08	1.57653e-07	6.99877e-05	0.000375043	-1.4723	25.2252	MCD1;IRR1;SMC3;BUB1;SMC1	GO Biological Process AutoRIF
septum_formation	7/159	3.14955e-08	1.67424e-07	0.000788221	0.00419002	-1.31666	22.7431	RAD53;MCM7;SWI5;MCM3;SWI4;MCM5;MCM2	Phenotype AutoRIF predicted Zscore
error-prone_translesion_synthesis_(GO:0042276)	6/99	4.93269e-08	2.04072e-07	6.87685e-05	0.00028614	-1.17623	19.7898	MRC1;SWI4;IRR1;SMC3;BUB1;SMC1	GO Biological Process AutoRIF predicted Zscore
mismatch_repair_(GO:0006298)	6/100	5.23966e-08	2.15541e-07	7.25328e-05	0.000298374	-1.2202	20.4559	MRC1;SWI4;GIN4;IRR1;BUB1;SMC1	GO Biological Process AutoRIF predicted Zscore
cellular_response_to_UV_(GO:0034644)	8/262	5.12422e-08	2.21666e-07	0.00198934	0.00725966	-1.08484	18.2109	RAD53;CLB6;DUN1;PDS1;SWI4;CDC28;MCM5;SMC3	GO Biological Process AutoRIF
regulation_of_cell_wall_organization_or_biogenesis_(GO:1903338)	9/374	5.24713e-08	2.25715e-07	0.00494729	0.0149389	-1.10427	18.5109	CDC20;RAD53;CDC45;MOB1;CDC28;MCM4;MCM5;MCM6;MCM2	GO Biological Process AutoRIF
DNA_duplex_unwinding_(GO:0032508)	7/175	6.09171e-08	2.49175e-07	0.000198497	0.000798399	-1.00232	16.6523	HSL1;RAD53;MRC1;SWI4;MCM6;BUB1;MCM2	GO Biological Process AutoRIF predicted Zscore
activation_of_GTPase_activity_(GO:0090630)	6/103	6.25658e-08	2.67642e-07	0.000321263	0.00149019	-1.16839	19.3801	SIC1;DBF2;CLB2;CDC28;FAR1;CDC5	GO Biological Process AutoRIF
nuclear_import	6/108	8.31047e-08	2.77016e-07	0.0016296	0.00560174	-1.01745	16.5877	RAD53;CDC45;CLB2;SWI5;CDC28;SWI4	Phenotype AutoRIF
negative_regulation_of_apoptotic_process_(GO:0043066)	7/180	7.38959e-08	3.00565e-07	0.00023483	0.000939321	-1.12485	18.4707	RAD53;MCM7;MCM3;MCM4;IRR1;MCM6;MCM2	GO Biological Process AutoRIF predicted Zscore
cellular_macromolecular_complex_assembly_(GO:0034622)	8/274	7.23752e-08	3.07895e-07	0.00261861	0.00896147	-1.12781	18.5427	CDC45;MCM7;MRC1;MCM3;CDC28;SMC3;BUB1;MCM2	GO Biological Process AutoRIF
histone_acetylation_(GO:0016573)	6/106	7.43097e-08	3.14387e-07	0.000372259	0.00170619	-1.18554	19.4607	RAD53;MCD1;CDC28;IRR1;SMC3;MCM2	GO Biological Process AutoRIF
protein_stabilization_(GO:0050821)	7/182	7.97049e-08	3.22382e-07	0.000250794	0.000992213	-1.09318	17.8679	RAD53;CDC45;MCM3;SWI4;IRR1;MCM6;MCM2	GO Biological Process AutoRIF predicted Zscore
response_to_nutrient_levels_(GO:0031667)	8/277	7.87022e-08	3.31151e-07	0.00279818	0.00948165	-1.21719	19.9102	RAD53;DBF2;CLB2;PDS1;SWI4;CDC28;FAR1;PCL1	GO Biological Process AutoRIF
cellular_response_to_DNA_damage_stimulus_(GO:0006974)	3/5	7.97342e-08	3.31867e-07	3.38704e-05	0.000194628	-2.15651	35.2472	RAD53;CLB2;CDC28	GO Biological Process AutoRIF
cellular_bud_site_selection_(GO:0000282)	7/182	7.97049e-08	3.31867e-07	0.0010939	0.00431951	-1.16043	18.9671	HSL1;MAD2;RAD53;CLB2;CLB1;CDC28;FAR1	GO Biological Process AutoRIF
nuclear_import_(GO:0051170)	6/108	8.31047e-08	3.44035e-07	0.000409644	0.00184906	-1.19705	19.5157	RAD53;CDC45;CLB2;SWI5;SWI4;CDC28	GO Biological Process AutoRIF
telomere_maintenance_(GO:0000723)	6/109	8.78136e-08	3.59662e-07	0.000429408	0.00191124	-1.3909	22.5994	RAD53;DUN1;CLB2;MRC1;CDC28;MCM1	GO Biological Process AutoRIF
double-strand_break_repair_(GO:0006302)	6/109	8.78136e-08	3.59662e-07	0.000429408	0.00191124	-1.26597	20.5695	RAD53;MCD1;PDS1;CDC28;CDC5;SMC3	GO Biological Process AutoRIF
response_to_UV_(GO:0009411)	5/55	9.07363e-08	3.64962e-07	4.87757e-05	0.000233865	-1.5312	24.829	SWI4;IRR1;MCM6;BUB1;MCM2	GO Biological Process AutoRIF predicted Zscore
transcription_from_RNA_polymerase_III_promoter_(GO:0006383)	7/186	9.24876e-08	3.6995e-07	0.000285361	0.00112283	-1.13306	18.3513	RAD53;CDC45;MRC1;SWI4;MCM6;BUB1;MCM2	GO Biological Process AutoRIF predicted Zscore
protein_import_into_nucleus_(GO:0006606)	6/110	9.27402e-08	3.75842e-07	0.000449913	0.00198431	-1.21285	19.6402	RAD53;CDC45;CLB2;SWI5;SWI4;CDC28	GO Biological Process AutoRIF
positive_regulation_of_hydrolase_activity_(GO:0051345)	7/186	9.24876e-08	3.75842e-07	0.00123717	0.00477562	-1.07827	17.4639	CDC20;SWI5;SWI4;CDC28;PHO5;CDC5;MCM1	GO Biological Process AutoRIF
bud_neck_morphology	7/181	7.67539e-08	3.87607e-07	0.00165278	0.00794908	-1.62715	26.657	CDC20;RAD53;CLB6;PDS1;SWI4;MCM6;MCM2	Phenotype AutoRIF predicted Zscore
regulation_of_cell_cycle_(GO:0051726)	7/189	1.03175e-07	4.10433e-07	0.000313735	0.0012212	-1.05562	16.9815	RAD53;SWI4;IRR1;MCM6;SMC3;SMC1;MCM2	GO Biological Process AutoRIF predicted Zscore
DNA_strand_elongation_(GO:0022616)	6/112	1.03278e-07	4.16357e-07	0.00049322	0.00213359	-1.16942	18.8111	RAD53;CDC45;MRC1;MCM4;MCM5;MCM2	GO Biological Process AutoRIF
haploinsufficient	4/23	1.30819e-07	4.23236e-07	0.000212952	0.000900952	-1.40471	22.2639	MCM7;SWI4;MCM5;MCM1	Phenotype AutoRIF
nucleolus_organization_(GO:0007000)	5/57	1.08885e-07	4.36673e-07	0.000179628	0.000886625	-1.35308	21.6938	CDC20;MAD2;DBF2;CDC5;SMC3	GO Biological Process AutoRIF
nuclear_export	6/118	1.40971e-07	4.43052e-07	0.00250802	0.00811419	-0.873077	13.7725	RAD53;CDC45;CLB2;SWI5;CDC28;SWI4	Phenotype AutoRIF
protein_localization_to_nuclear_envelope_(GO:0090435)	7/192	1.14888e-07	4.5453e-07	0.000344345	0.00131908	-1.20153	19.1996	RAD53;CLB6;CLB2;SWI4;MCM5;MCM6;MCM2	GO Biological Process AutoRIF predicted Zscore
actin_cytoskeleton_morphology	7/202	1.62382e-07	4.96169e-07	0.00845567	0.0238493	-1.07521	16.8091	CDC20;CLN2;CLB2;PDS1;CDC28;FAR1;CDC5	Phenotype AutoRIF
histone_lysine_methylation_(GO:0034968)	5/59	1.29799e-07	5.10732e-07	6.67515e-05	0.000279353	-1.423	22.565	CDC45;MRC1;MCM6;BUB1;MCM2	GO Biological Process AutoRIF predicted Zscore
mating_response	6/122	1.71891e-07	5.11026e-07	0.00294515	0.00925619	-0.933609	14.5423	RAD53;CLN2;CLB5;CDC28;FAR1;MCM1	Phenotype AutoRIF
DNA-dependent_DNA_replication_(GO:0006261)	5/59	1.29799e-07	5.17852e-07	0.000208943	0.00101827	-1.3884	22.0163	RAD53;MCM3;MCM4;MCM5;MCM2	GO Biological Process AutoRIF
bipolar_cellular_bud_site_selection_(GO:0007121)	7/200	1.51749e-07	5.18238e-07	0.000437905	0.00146103	-1.52298	23.9123	RAD53;MCM7;CLB2;SWI5;MCM3;MCM4;MCM2	GO Biological Process AutoRIF predicted Zscore
regulation_of_cyclin-dependent_protein_serine/threonine_kinase_activity_(GO:0000079)	7/200	1.51749e-07	5.18238e-07	0.000437905	0.00146103	-1.52113	23.8833	CDC20;CLB6;CLB5;CLB1;PDS1;SWI4;CDC5	GO Biological Process AutoRIF predicted Zscore
negative_regulation_of_nuclear_division_(GO:0051784)	7/200	1.51749e-07	5.18238e-07	0.000437905	0.00146103	-1.50302	23.599	RAD53;PDS1;SWI4;IRR1;MCM6;SMC3;MCM2	GO Biological Process AutoRIF predicted Zscore
regulation_of_meiotic_nuclear_division_(GO:0040020)	7/200	1.51749e-07	5.18238e-07	0.000437905	0.00146103	-1.44214	22.643	CDC20;PDS1;SWI4;IRR1;CDC5;SMC3;SMC1	GO Biological Process AutoRIF predicted Zscore
regulation_of_microtubule_polymerization_(GO:0031113)	7/200	1.51749e-07	5.18238e-07	0.000437905	0.00146103	-1.42286	22.3404	CDC20;CLB6;PDS1;SWI4;IRR1;CDC5;SMC3	GO Biological Process AutoRIF predicted Zscore
cytoplasmic_mRNA_processing_body_assembly_(GO:0033962)	7/200	1.51749e-07	5.18238e-07	0.000437905	0.00146103	-1.40681	22.0883	RAD53;MCM7;CLB2;MCM3;SWI4;MCM4;MCM2	GO Biological Process AutoRIF predicted Zscore
negative_regulation_of_cell_cycle_process_(GO:0010948)	7/200	1.51749e-07	5.18238e-07	0.000437905	0.00146103	-1.40273	22.0244	RAD53;MCM3;SWI4;IRR1;MCM6;SMC3;MCM2	GO Biological Process AutoRIF predicted Zscore
negative_regulation_of_mitotic_cell_cycle_(GO:0045930)	7/200	1.51749e-07	5.18238e-07	0.000437905	0.00146103	-1.37471	21.5844	RAD53;PDS1;SWI4;IRR1;MCM6;SMC3;MCM2	GO Biological Process AutoRIF predicted Zscore
meiosis_II_(GO:0007135)	7/200	1.51749e-07	5.18238e-07	0.000437905	0.00146103	-1.36347	21.4078	CDC20;CLB6;CLB5;PDS1;SWI4;IRR1;CDC5	GO Biological Process AutoRIF predicted Zscore
anaphase-promoting_complex-dependent_catabolic_process_(GO:0031145)	7/200	1.51749e-07	5.18238e-07	0.000437905	0.00146103	-1.36256	21.3936	CDC20;CLB6;CLB5;CLB1;PDS1;SWI4;CDC5	GO Biological Process AutoRIF predicted Zscore
regulation_of_meiotic_cell_cycle_(GO:0051445)	7/200	1.51749e-07	5.18238e-07	0.000437905	0.00146103	-1.334	20.9452	CDC20;PDS1;SWI4;IRR1;CDC5;SMC3;SMC1	GO Biological Process AutoRIF predicted Zscore
microtubule_nucleation_(GO:0007020)	7/200	1.51749e-07	5.18238e-07	0.000437905	0.00146103	-1.32608	20.8208	CDC20;CLB6;SPO12;CLB1;PDS1;SWI4;CDC5	GO Biological Process AutoRIF predicted Zscore
regulation_of_meiosis_I_(GO:0060631)	7/200	1.51749e-07	5.18238e-07	0.000437905	0.00146103	-1.30792	20.5357	CDC20;PDS1;SWI4;IRR1;CDC5;SMC3;SMC1	GO Biological Process AutoRIF predicted Zscore
regulation_of_mitotic_nuclear_division_(GO:0007088)	7/200	1.51749e-07	5.18238e-07	0.000437905	0.00146103	-1.30143	20.4338	CDC20;CLB6;PDS1;SWI4;IRR1;CDC5;SMC3	GO Biological Process AutoRIF predicted Zscore
regulation_of_transcription_from_RNA_polymerase_I_promoter_(GO:0006356)	7/200	1.51749e-07	5.18238e-07	0.000437905	0.00146103	-1.29626	20.3527	RAD53;MCM7;CLB2;MCM3;SWI4;MCM6;MCM2	GO Biological Process AutoRIF predicted Zscore
cytoplasmic_microtubule_organization_(GO:0031122)	7/200	1.51749e-07	5.18238e-07	0.000437905	0.00146103	-1.28402	20.1604	CDC20;CLB6;CLB1;PDS1;SWI4;IRR1;CDC5	GO Biological Process AutoRIF predicted Zscore
microtubule_polymerization_or_depolymerization_(GO:0031109)	7/200	1.51749e-07	5.18238e-07	0.000437905	0.00146103	-1.25356	19.6821	RAD53;PDS1;SWI4;IRR1;MCM6;SMC3;MCM2	GO Biological Process AutoRIF predicted Zscore
exit_from_mitosis_(GO:0010458)	7/200	1.51749e-07	5.18238e-07	0.000437905	0.00146103	-1.2247	19.2291	CDC20;CLB6;CLB1;PDS1;SWI4;IRR1;CDC5	GO Biological Process AutoRIF predicted Zscore
positive_regulation_of_cell_cycle_(GO:0045787)	7/200	1.51749e-07	5.18238e-07	0.000437905	0.00146103	-1.21302	19.0457	RAD53;SWI4;IRR1;MCM6;SMC3;SMC1;MCM2	GO Biological Process AutoRIF predicted Zscore
cellular_protein_complex_localization_(GO:0034629)	7/200	1.51749e-07	5.18238e-07	0.000437905	0.00146103	-1.20526	18.9238	RAD53;SWI4;MCM5;IRR1;MCM6;SMC3;MCM2	GO Biological Process AutoRIF predicted Zscore
meiosis_I_(GO:0007127)	7/200	1.51749e-07	5.18238e-07	0.000437905	0.00146103	-1.20336	18.8939	CLB5;PDS1;SWI4;IRR1;CDC5;SMC3;SMC1	GO Biological Process AutoRIF predicted Zscore
axial_cellular_bud_site_selection_(GO:0007120)	7/200	1.51749e-07	5.18238e-07	0.000437905	0.00146103	-1.20215	18.875	RAD53;CLB2;SWI5;SWI4;MCM4;MCM6;MCM2	GO Biological Process AutoRIF predicted Zscore
regulation_of_ATPase_activity_(GO:0043462)	7/200	1.51749e-07	5.18238e-07	0.000437905	0.00146103	-1.18406	18.591	RAD53;SWI4;MCM4;IRR1;MCM6;SMC3;MCM2	GO Biological Process AutoRIF predicted Zscore
regulation_of_mitotic_sister_chromatid_separation_(GO:0010965)	7/200	1.51749e-07	5.18238e-07	0.000437905	0.00146103	-1.18312	18.5762	CDC20;CLB6;CLB1;PDS1;SWI4;IRR1;CDC5	GO Biological Process AutoRIF predicted Zscore
ribosome_disassembly_(GO:0032790)	7/200	1.51749e-07	5.18238e-07	0.000437905	0.00146103	-1.16504	18.2924	RAD53;MCM7;CLB2;MCM3;MCM4;MCM6;MCM2	GO Biological Process AutoRIF predicted Zscore
protein_modification_by_small_protein_removal_(GO:0070646)	7/200	1.51749e-07	5.18238e-07	0.000437905	0.00146103	-1.15644	18.1573	MCM7;MCM3;MCM4;MCM5;IRR1;MCM6;MCM2	GO Biological Process AutoRIF predicted Zscore
regulation_of_mitotic_cell_cycle_phase_transition_(GO:1901990)	7/200	1.51749e-07	5.18238e-07	0.000437905	0.00146103	-1.1144	17.4972	CDC20;RAD53;CLB6;PDS1;SWI4;MCM6;MCM2	GO Biological Process AutoRIF predicted Zscore
regulation_of_histone_H3-K4_methylation_(GO:0051569)	7/200	1.51749e-07	5.18238e-07	0.000437905	0.00146103	-1.07904	16.9421	HSL1;CDC45;MRC1;MCD1;GIN4;MCM6;MCM2	GO Biological Process AutoRIF predicted Zscore
positive_regulation_of_cyclin-dependent_protein_kinase_activity_(GO:1904031)	4/23	1.30819e-07	5.19228e-07	7.68174e-05	0.000407927	-1.40323	22.2405	CDC20;CDC28;FAR1;PHO5	GO Biological Process AutoRIF
negative_regulation_of_transferase_activity_(GO:0051348)	6/117	1.34004e-07	5.26445e-07	0.000615823	0.00259117	-1.09438	17.319	CDC20;CLB5;CLB2;CDC28;FAR1;CDC5	GO Biological Process AutoRIF
protein_export_from_nucleus_(GO:0006611)	6/117	1.34004e-07	5.26445e-07	0.000615823	0.00259117	-1.04966	16.6112	RAD53;CDC45;CLB2;SWI5;SWI4;CDC28	GO Biological Process AutoRIF
cytokinesis	7/200	1.51749e-07	5.47381e-07	0.00288754	0.00940779	-1.47487	23.157	CDC20;RAD53;CLB6;PDS1;SWI4;MCM6;MCM2	Phenotype AutoRIF predicted Zscore
cell_cycle_progression_in_metaphase	7/200	1.51749e-07	5.47381e-07	0.00288754	0.00940779	-1.47163	23.1061	CDC20;CLB6;PDS1;SWI4;IRR1;CDC5;SMC3	Phenotype AutoRIF predicted Zscore
cell_cycle_progression_in_telophase	7/200	1.51749e-07	5.47381e-07	0.00288754	0.00940779	-1.4715	23.1041	CDC20;CLB6;CLB5;CLB1;PDS1;SWI4;CDC5	Phenotype AutoRIF predicted Zscore
cytoskeleton_morphology	7/200	1.51749e-07	5.47381e-07	0.00288754	0.00940779	-1.43233	22.4891	RAD53;PDS1;SWI4;IRR1;MCM6;SMC3;MCM2	Phenotype AutoRIF predicted Zscore
meiosis	7/200	1.51749e-07	5.47381e-07	0.00288754	0.00940779	-1.27344	19.9943	CLB5;PDS1;SWI4;IRR1;CDC5;SMC3;SMC1	Phenotype AutoRIF predicted Zscore
axial_budding_pattern	7/200	1.51749e-07	5.47381e-07	0.00288754	0.00940779	-1.24013	19.4714	HSL1;RAD53;CDC45;SWI5;SWI4;MCM6;MCM2	Phenotype AutoRIF predicted Zscore
chitin_deposition	7/200	1.51749e-07	5.47381e-07	0.00288754	0.00940779	-1.20886	18.9804	RAD53;MCM7;MCM3;SWI4;MCM4;IRR1;MCM2	Phenotype AutoRIF predicted Zscore
sterile	7/200	1.51749e-07	5.47381e-07	0.00288754	0.00940779	-1.20202	18.873	CDC45;SWI4;MCM5;IRR1;MCM6;SMC3;MCM2	Phenotype AutoRIF predicted Zscore
nuclear_export_(GO:0051168)	6/118	1.40971e-07	5.51003e-07	0.000642966	0.00267613	-1.12715	17.7805	RAD53;CDC45;CLB2;SWI5;SWI4;CDC28	GO Biological Process AutoRIF
histone_ubiquitination_(GO:0016574)	7/199	1.46657e-07	5.70333e-07	0.00180762	0.00675663	-1.06838	16.8112	RAD53;MCD1;PDS1;CDC28;CDC5;SMC3;MCM1	GO Biological Process AutoRIF
septin_ring_assembly_(GO:0000921)	5/61	1.5378e-07	5.95027e-07	0.00024178	0.00115634	-1.22665	19.2433	HSL1;DBF2;CDC28;GIN4;CDC5	GO Biological Process AutoRIF
protein_polyubiquitination_(GO:0000209)	6/121	1.63683e-07	6.30179e-07	0.00073002	0.00300597	-1.09025	17.0355	CDC20;HSL1;RAD53;SIC1;CLB2;CDC28	GO Biological Process AutoRIF
nucleus_organization_(GO:0006997)	8/306	1.68859e-07	6.46873e-07	0.00508216	0.0152862	-1.00011	15.596	CDC20;RAD53;CDC45;CDC28;IRR1;SMC3;BUB1;MCM1	GO Biological Process AutoRIF
DNA_biosynthetic_process_(GO:0071897)	7/205	1.79508e-07	6.80892e-07	0.00213203	0.00767131	-1.14034	17.713	RAD53;CDC45;DUN1;CLB1;CDC28;MCM1;MCM2	GO Biological Process AutoRIF
posttranscriptional_regulation_of_gene_expression_(GO:0010608)	7/205	1.79508e-07	6.80892e-07	0.00213203	0.00767131	-0.971436	15.0894	RAD53;CLN2;DUN1;CLB1;SWI4;CDC28;FAR1	GO Biological Process AutoRIF
negative_regulation_of_meiotic_cell_cycle_(GO:0051447)	4/25	1.86331e-07	7.03308e-07	0.000102651	0.000523452	-1.42266	22.0451	CLB5;MCM7;CDC28;CDC5	GO Biological Process AutoRIF
macromolecular_complex_assembly_(GO:0065003)	6/126	2.08186e-07	7.07636e-07	0.000244576	0.000972929	-1.32049	20.3156	RAD53;CDC45;SWI4;MCM6;BUB1;MCM2	GO Biological Process AutoRIF predicted Zscore
DNA_recombination_(GO:0006310)	7/207	1.91752e-07	7.20239e-07	0.00224969	0.00801973	-1.14369	17.6895	RAD53;DUN1;CLB2;MCD1;CLB1;IRR1;SMC3	GO Biological Process AutoRIF
actin_polymerization_or_depolymerization_(GO:0008154)	7/209	2.04693e-07	7.65115e-07	0.00237235	0.00834115	-1.12084	17.2629	CDC20;RAD53;CLN2;CLB2;MRC1;CDC28;BUB1	GO Biological Process AutoRIF
cellular_response_to_UV_(GO:0034644)	6/130	2.50561e-07	8.47693e-07	0.000287767	0.00112618	-1.12894	17.1593	RAD53;SWI4;IRR1;MCM6;SMC3;MCM2	GO Biological Process AutoRIF predicted Zscore
protein_depolymerization_(GO:0051261)	6/128	2.28567e-07	8.50225e-07	0.000968816	0.00392625	-1.09229	16.7027	CDC20;RAD53;CLN2;MRC1;CDC28;BUB1	GO Biological Process AutoRIF
cellular_modified_amino_acid_biosynthetic_process_(GO:0042398)	8/322	2.49071e-07	9.1437e-07	0.00684836	0.0199936	-1.24268	18.8956	HSL1;RAD53;CDC45;MCM7;CLB2;CDC28;CDC5;MCM2	GO Biological Process AutoRIF
cellular_modified_amino_acid_catabolic_process_(GO:0042219)	8/322	2.49071e-07	9.1437e-07	0.00684836	0.0199936	-1.23976	18.8512	HSL1;RAD53;CDC45;MCM7;CLB2;CDC28;CDC5;MCM2	GO Biological Process AutoRIF
negative_regulation_of_microtubule_polymerization_or_depolymerization_(GO:0031111)	6/130	2.50561e-07	9.1437e-07	0.00104704	0.00417732	-1.09725	16.6777	CDC20;RAD53;CLN2;MRC1;CDC28;BUB1	GO Biological Process AutoRIF
positive_regulation_of_microtubule_polymerization_or_depolymerization_(GO:0031112)	6/130	2.50561e-07	9.1437e-07	0.00104704	0.00417732	-1.06935	16.2537	CDC20;RAD53;CLN2;MRC1;CDC28;BUB1	GO Biological Process AutoRIF
regulation_of_double-strand_break_repair_via_nonhomologous_end_joining_(GO:2001032)	5/68	2.66636e-07	9.68443e-07	0.000388476	0.00176998	-1.09918	16.6387	CDC20;RAD53;DUN1;MCM3;CDC28	GO Biological Process AutoRIF
nucleolar_morphology	6/137	3.41695e-07	9.89117e-07	0.00511006	0.0147923	-0.753922	11.2254	CDC20;SPO12;CLB2;PDS1;CDC28;CDC5	Phenotype AutoRIF
protein_localization_to_cell_cortex_(GO:0072697)	6/133	2.86792e-07	1.03676e-06	0.00117343	0.00458649	-1.08708	16.3763	HSL1;CLB5;MOB1;DBF2;CDC28;FAR1	GO Biological Process AutoRIF
DNA_double-strand_break_processing_(GO:0000729)	6/135	3.13256e-07	1.12714e-06	0.001264	0.00484219	-1.08324	16.2228	MAD2;RAD53;MRC1;MCD1;CDC28;CDC5	GO Biological Process AutoRIF
critical_cell_size_at_START_(G1_cell-size_checkpoint)	4/30	4.00691e-07	1.13015e-06	0.000531147	0.0020147	-1.17182	17.261	CLB5;CLB1;CDC28;SWI4	Phenotype AutoRIF
translesion_synthesis_(GO:0019985)	5/72	3.55744e-07	1.19795e-06	0.000162144	0.000655825	-1.4602	21.6825	HSL1;MRC1;SWI4;BUB1;SMC1	GO Biological Process AutoRIF predicted Zscore
DNA_repair_(GO:0006281)	7/231	4.03009e-07	1.43003e-06	0.00409352	0.0130789	-1.21904	17.9495	RAD53;DUN1;CLB2;MCD1;CDC28;IRR1;SMC3	GO Biological Process AutoRIF
base-excision_repair_(GO:0006284)	7/231	4.03009e-07	1.43003e-06	0.00409352	0.0130789	-1.19393	17.5798	RAD53;DUN1;CLB2;MCD1;CDC28;IRR1;SMC3	GO Biological Process AutoRIF
nucleotide-excision_repair_(GO:0006289)	7/231	4.03009e-07	1.43003e-06	0.00409352	0.0130789	-1.16606	17.1694	RAD53;DUN1;CLB2;MCD1;CDC28;IRR1;SMC3	GO Biological Process AutoRIF
regulation_of_endodeoxyribonuclease_activity_(GO:0032071)	6/146	4.97237e-07	1.66666e-06	0.000524087	0.00174055	-1.06498	15.4573	MRC1;SWI4;IRR1;MCM6;BUB1;MCM2	GO Biological Process AutoRIF predicted Zscore
nuclear_position	5/77	4.98597e-07	1.73649e-06	0.000973408	0.00491571	-1.18359	17.1757	CDC45;SWI4;MCM6;BUB1;MCM2	Phenotype AutoRIF predicted Zscore
regulation of establishment or maintenance of cell polarity (GO:0032878)	3/7	2.78275e-07	1.74916e-06	6.92644e-05	0.000443511	-2.05526	31.0235	PCL9;PCL2;PCL1	GO Biological Process 2018
cell cycle G1/S phase transition (GO:0044843)	4/28	3.00254e-07	1.83489e-06	0.000145832	0.000891198	-1.47242	22.1137	CLB6;SIC1;CLB5;CDC28	GO Biological Process 2018
regulation_of_intracellular_pH_(GO:0051453)	8/363	6.17572e-07	2.18133e-06	0.0135197	0.0358971	-1.16808	16.7005	RAD53;CLN2;DUN1;YOX1;CLB2;CLB1;CDC28;MCM2	GO Biological Process AutoRIF
regulation_of_GTPase_activity_(GO:0043087)	6/152	6.30078e-07	2.21534e-06	0.00226838	0.00804911	-1.12739	16.0962	CDC20;DBF2;CLB2;CDC28;FAR1;CDC5	GO Biological Process AutoRIF
nucleolus_organization_(GO:0007000)	5/84	7.70924e-07	2.57212e-06	0.000320896	0.0012424	-1.0896	15.3368	MRC1;SWI4;MCM6;BUB1;MCM2	GO Biological Process AutoRIF predicted Zscore
protein_sumoylation_(GO:0016925)	5/85	8.17878e-07	2.71626e-06	0.000338086	0.00130199	-1.23762	17.3471	HSL1;MRC1;SWI4;BUB1;SMC1	GO Biological Process AutoRIF predicted Zscore
cellular_response_to_cold_(GO:0070417)	6/159	8.20494e-07	2.87173e-06	0.00282359	0.00948883	-0.960348	13.4577	RAD53;SWI4;CDC28;MCM4;BUB1;MCM2	GO Biological Process AutoRIF
protein_complex_localization_(GO:0031503)	6/161	8.828e-07	2.91848e-06	0.000863148	0.00280233	-1.2517	17.4489	RAD53;SWI4;MCM5;IRR1;MCM6;MCM2	GO Biological Process AutoRIF predicted Zscore
histone_deacetylation_(GO:0016575)	6/162	9.15376e-07	3.18932e-06	0.00309062	0.0103021	-1.05276	14.6375	HSL1;RAD53;CDC28;MCM6;SMC3;MCM2	GO Biological Process AutoRIF
positive_regulation_of_mitotic_cell_cycle_phase_transition_(GO:1901992)	3/10	9.50013e-07	3.29509e-06	0.000167785	0.000833513	-1.66176	23.0433	CDC20;PDS1;CDC5	GO Biological Process AutoRIF
bipolar_budding_pattern	6/164	9.83484e-07	3.31106e-06	0.00491919	0.0155262	-1.06379	14.7145	RAD53;CLN2;CDC45;CLB2;SWI5;MCM2	Phenotype AutoRIF predicted Zscore
cellular response to DNA damage stimulus (GO:0006974)	6/149	5.60435e-07	3.33232e-06	0.00194003	0.00778024	-1.45687	20.971	RAD53;DUN1;MRC1;MCD1;PDS1;MCM2	GO Biological Process 2018
ionizing_radiation_resistance	5/89	1.02876e-06	3.35177e-06	0.00180608	0.00829155	-1.25725	17.3338	RAD53;SWI4;IRR1;MCM6;MCM2	Phenotype AutoRIF predicted Zscore
regulation of transcription involved in G1/S transition of mitotic cell cycle (GO:0000083)	4/33	5.95643e-07	3.44846e-06	0.000259591	0.00146436	-1.36383	19.5486	PCL9;YOX1;SWI5;SWI4	GO Biological Process 2018
nuclear-transcribed_mRNA_catabolic_process,_nonsense-mediated_decay_(GO:0000184)	6/166	1.05569e-06	3.47417e-06	0.00100758	0.00321361	-1.43957	19.8104	RAD53;MCM7;CLB2;MCM3;MCM6;MCM2	GO Biological Process AutoRIF predicted Zscore
nuclear_migration_(GO:0007097)	5/89	1.02876e-06	3.55222e-06	0.00124042	0.00477562	-1.04918	14.4652	MCM7;DBF2;CLB2;MCM4;IRR1	GO Biological Process AutoRIF
microtubule_polymerization_or_depolymerization_(GO:0031109)	6/166	1.05569e-06	3.62893e-06	0.0034757	0.0113885	-0.911763	12.5471	CDC20;RAD53;CLN2;MRC1;CDC28;BUB1	GO Biological Process AutoRIF
nuclear_fusion_during_mating	6/174	1.38931e-06	3.82061e-06	0.0152099	0.0408071	-0.83159	11.2154	CDC20;RAD53;CLB2;CDC28;FAR1;MCM1	Phenotype AutoRIF
UV_resistance	5/92	1.21337e-06	3.8297e-06	0.002078	0.00912512	-1.38908	18.9222	RAD53;SWI4;IRR1;MCM6;MCM2	Phenotype AutoRIF predicted Zscore
regulation_of_mating_type_switching_(GO:0031494)	6/172	1.29879e-06	4.25484e-06	0.00120483	0.00382587	-0.906189	12.2826	RAD53;MCM3;SWI4;IRR1;MCM6;MCM2	GO Biological Process AutoRIF predicted Zscore
septin ring organization (GO:0031106)	4/35	7.59913e-07	4.28669e-06	0.000319271	0.00175599	-1.68671	23.7658	GIN4;KCC4;PCL2;PCL1	GO Biological Process 2018
maintenance_of_rDNA_(GO:0043007)	6/172	1.29879e-06	4.44473e-06	0.00411943	0.0131073	-1.07909	14.6261	RAD53;CDC45;DUN1;MCM3;MCM5;MCM2	GO Biological Process AutoRIF
septum_formation	6/181	1.74776e-06	4.6891e-06	0.0180839	0.0462611	-0.884256	11.7227	DBF2;CLB2;CDC28;GIN4;CDC5;PCL1	Phenotype AutoRIF
protein_deacetylation_(GO:0006476)	6/174	1.38931e-06	4.7335e-06	0.00435259	0.0137356	-0.955935	12.8924	HSL1;RAD53;CDC28;MCM6;SMC3;MCM2	GO Biological Process AutoRIF
cellular_glucan_metabolic_process_(GO:0006073)	7/279	1.42882e-06	4.84665e-06	0.011012	0.0299619	-1.17253	15.7807	DUN1;DBF2;CLB2;SWI4;CDC28;PCL2;PCL1	GO Biological Process AutoRIF
DNA unwinding involved in DNA replication (GO:0006268)	3/10	9.50013e-07	5.12811e-06	0.000162122	0.00096397	-1.99992	27.7325	MCM7;MCM4;MCM6	GO Biological Process 2018
peptidyl-serine phosphorylation (GO:0018105)	4/37	9.55693e-07	5.12811e-06	0.000388211	0.00208309	-1.34405	18.6296	HSL1;DUN1;DBF2;CDC28	GO Biological Process 2018
replicative_lifespan	6/186	2.04742e-06	5.36229e-06	0.0203549	0.0508871	-0.635099	8.31911	RAD53;CLB2;CDC28;SMC3;BUB1;MCM1	Phenotype AutoRIF
regulation_of_protein_sumoylation_(GO:0033233)	5/98	1.66057e-06	5.41555e-06	0.000631246	0.00208686	-1.11189	14.7975	HSL1;MRC1;GIN4;BUB1;SMC1	GO Biological Process AutoRIF predicted Zscore
mRNA_metabolic_process_(GO:0016071)	6/181	1.74776e-06	5.67433e-06	0.00155503	0.00491635	-1.19823	15.8852	RAD53;MCM7;CLB2;MCM3;MCM6;MCM2	GO Biological Process AutoRIF predicted Zscore
N-terminal_peptidyl-methionine_acetylation_(GO:0017196)	6/180	1.69236e-06	5.71544e-06	0.00511119	0.0153137	-1.13031	15.0211	HSL1;RAD53;CDC45;MCD1;SMC3;MCM2	GO Biological Process AutoRIF
mating_projection_morphology	6/184	1.92289e-06	5.88522e-06	0.00845681	0.0244039	-0.920891	12.1205	RAD53;DBF2;SWI5;MCM3;PCL2;MCM2	Phenotype AutoRIF predicted Zscore
telomere_length	6/190	2.31627e-06	5.92534e-06	0.0223079	0.053345	-0.564129	7.31988	RAD53;CLB5;DUN1;CLB2;CDC28;SWI4	Phenotype AutoRIF
cellular_macromolecular_complex_assembly_(GO:0034622)	6/183	1.86299e-06	6.02145e-06	0.00164248	0.00517023	-0.924772	12.2008	RAD53;CDC45;CLB2;SWI4;MCM6;MCM2	GO Biological Process AutoRIF predicted Zscore
regulation_of_transcription_regulatory_region_DNA_binding_(GO:2000677)	5/100	1.83543e-06	6.17152e-06	0.0020332	0.00738475	-0.949305	12.5386	RAD53;CLB2;SWI4;CDC28;MCM1	GO Biological Process AutoRIF
peptidyl-serine modification (GO:0018209)	4/39	1.18668e-06	6.21594e-06	0.000467206	0.00244727	-1.62594	22.1849	HSL1;DUN1;DBF2;CDC28	GO Biological Process 2018
regulation_of_DNA_biosynthetic_process_(GO:2000278)	5/102	2.02447e-06	6.48547e-06	0.000751469	0.00246183	-1.06834	14.0062	RAD53;SWI4;MCM6;BUB1;MCM2	GO Biological Process AutoRIF predicted Zscore
regulation_of_DNA_metabolic_process_(GO:0051052)	5/102	2.02447e-06	6.48547e-06	0.000751469	0.00246183	-1.06473	13.9589	RAD53;SWI4;MCM6;BUB1;MCM2	GO Biological Process AutoRIF predicted Zscore
negative_regulation_of_cell_cycle_process_(GO:0010948)	4/44	1.94411e-06	6.50855e-06	0.000745717	0.00305427	-1.23559	16.2488	CDC20;RAD53;CLB2;CDC28	GO Biological Process AutoRIF
protein_catabolic_process_(GO:0030163)	6/186	2.04742e-06	6.5301e-06	0.00178065	0.0055809	-0.911446	11.939	RAD53;SWI4;MCM5;IRR1;MCM6;MCM2	GO Biological Process AutoRIF predicted Zscore
mitotic DNA replication (GO:1902969)	3/11	1.30441e-06	6.67371e-06	0.000205098	0.00118741	-1.93866	26.2684	CDC45;MCM3;MCM2	GO Biological Process 2018
DNA-dependent_DNA_replication_(GO:0006261)	5/104	2.22852e-06	7.07653e-06	0.000817654	0.00266658	-1.10943	14.4383	HSL1;MRC1;SWI4;MCM6;BUB1	GO Biological Process AutoRIF predicted Zscore
nucleocytoplasmic_transport_(GO:0006913)	5/104	2.22852e-06	7.39638e-06	0.00239758	0.00835355	-1.05639	13.7481	RAD53;CDC45;CLB2;SWI4;CDC28	GO Biological Process AutoRIF
recombinational_repair_(GO:0000725)	5/104	2.22852e-06	7.39638e-06	0.00239758	0.00835355	-1.04332	13.5779	RAD53;MCD1;PDS1;CDC28;SMC3	GO Biological Process AutoRIF
chromatin_assembly_or_disassembly_(GO:0006333)	5/105	2.33644e-06	7.72127e-06	0.00249567	0.00861734	-1.38202	17.9205	CDC20;RAD53;CDC45;BUB1;MCM2	GO Biological Process AutoRIF
inviable	6/200	3.11645e-06	7.86903e-06	0.0124052	0.0291377	-1.17756	14.9301	RAD53;MCM3;SWI4;IRR1;MCM6;MCM2	Phenotype AutoRIF predicted Zscore
bud_morphology	6/200	3.11645e-06	7.86903e-06	0.0124052	0.0291377	-1.07622	13.6452	CDC20;RAD53;SWI5;SWI4;MCM6;MCM2	Phenotype AutoRIF predicted Zscore
cell_cycle_progression_in_late_anaphase	6/200	3.11645e-06	7.86903e-06	0.0124052	0.0291377	-1.06401	13.4904	CDC20;CLB6;CLB1;PDS1;SWI4;CDC5	Phenotype AutoRIF predicted Zscore
RNA_localization	6/200	3.11645e-06	7.86903e-06	0.0124052	0.0291377	-0.91689	11.6251	RAD53;CDC45;CLB2;MCM3;MCM6;MCM2	Phenotype AutoRIF predicted Zscore
mitochondrial_rho-_mutation_frequency	6/200	3.11645e-06	7.86903e-06	0.0124052	0.0291377	-0.891014	11.297	RAD53;MCM3;SWI4;IRR1;MCM6;MCM2	Phenotype AutoRIF predicted Zscore
mutation_frequency	6/200	3.11645e-06	7.86903e-06	0.0124052	0.0291377	-0.866024	10.9802	RAD53;SWI4;IRR1;MCM6;SMC3;MCM2	Phenotype AutoRIF predicted Zscore
viable	6/200	3.11645e-06	7.86903e-06	0.0124052	0.0291377	-0.822532	10.4287	RAD53;SWI4;IRR1;MCM6;SMC3;MCM2	Phenotype AutoRIF predicted Zscore
double-strand_break_repair_via_homologous_recombination_(GO:0000724)	5/106	2.44842e-06	8.05678e-06	0.00259667	0.00892604	-1.08925	14.0732	RAD53;MCD1;PDS1;CDC28;SMC3	GO Biological Process AutoRIF
DNA_repair_complex_assembly_(GO:0090735)	5/107	2.56459e-06	8.07288e-06	0.000925001	0.00297645	-1.06611	13.7248	MRC1;SWI4;MCM6;BUB1;SMC1	GO Biological Process AutoRIF predicted Zscore
histone_modification_(GO:0016570)	5/107	2.56459e-06	8.07288e-06	0.000925001	0.00297645	-1.02971	13.2562	CDC45;SWI4;MCM6;BUB1;MCM2	GO Biological Process AutoRIF predicted Zscore
pseudohyphal_growth	5/113	3.35579e-06	8.20305e-06	0.0102672	0.0282347	-0.855892	10.7884	HSL1;CLB2;CLB1;SWI5;CDC28	Phenotype AutoRIF
heat_sensitivity	7/317	3.32984e-06	8.20305e-06	0.071202	0.142404	-0.669711	8.44679	MAD2;HSL1;RAD53;CLN2;DUN1;CDC28;SWI4	Phenotype AutoRIF
regulation_of_kinase_activity_(GO:0043549)	6/195	2.69218e-06	8.40146e-06	0.0022489	0.00692853	-1.08925	13.9698	RAD53;MCM3;SWI4;IRR1;MCM6;MCM2	GO Biological Process AutoRIF predicted Zscore
nuclear_migration_along_microtubule_(GO:0030473)	5/108	2.68505e-06	8.40146e-06	0.000963022	0.00308508	-0.970955	12.4552	HSL1;CDC45;PDS1;SWI4;BUB1	GO Biological Process AutoRIF predicted Zscore
postreplication_repair_(GO:0006301)	5/107	2.56459e-06	8.40313e-06	0.00270061	0.00920119	-0.949583	12.2247	RAD53;DUN1;MRC1;CDC28;MCM5	GO Biological Process AutoRIF
regulation_of_translational_initiation_(GO:0006446)	6/200	3.11645e-06	8.71161e-06	0.00254653	0.00698367	-1.32338	16.7789	RAD53;MCM7;CLB2;MCM3;MCM6;MCM2	GO Biological Process AutoRIF predicted Zscore
DNA_replication-independent_nucleosome_assembly_(GO:0006336)	6/200	3.11645e-06	8.71161e-06	0.00254653	0.00698367	-1.29385	16.4045	HSL1;MRC1;MCD1;GIN4;BUB1;SMC1	GO Biological Process AutoRIF predicted Zscore
threonine_biosynthetic_process_(GO:0009088)	6/200	3.11645e-06	8.71161e-06	0.00254653	0.00698367	-1.27467	16.1613	RAD53;SWI4;IRR1;MCM6;SMC3;MCM2	GO Biological Process AutoRIF predicted Zscore
threonine_metabolic_process_(GO:0006566)	6/200	3.11645e-06	8.71161e-06	0.00254653	0.00698367	-1.26795	16.0761	RAD53;SWI4;IRR1;MCM6;SMC3;MCM2	GO Biological Process AutoRIF predicted Zscore
cytokinesis,_site_selection_(GO:0007105)	6/200	3.11645e-06	8.71161e-06	0.00254653	0.00698367	-1.26253	16.0074	RAD53;CLB2;SWI4;MCM4;MCM6;MCM2	GO Biological Process AutoRIF predicted Zscore
positive_regulation_of_chromosome_segregation_(GO:0051984)	6/200	3.11645e-06	8.71161e-06	0.00254653	0.00698367	-1.25096	15.8607	CLB6;CLB5;PDS1;SWI4;IRR1;CDC5	GO Biological Process AutoRIF predicted Zscore
actin_polymerization_or_depolymerization_(GO:0008154)	6/200	3.11645e-06	8.71161e-06	0.00254653	0.00698367	-1.24842	15.8285	RAD53;SWI4;IRR1;MCM6;SMC3;MCM2	GO Biological Process AutoRIF predicted Zscore
protein_ubiquitination_(GO:0016567)	6/200	3.11645e-06	8.71161e-06	0.00254653	0.00698367	-1.20488	15.2764	RAD53;SWI4;IRR1;MCM6;SMC3;MCM2	GO Biological Process AutoRIF predicted Zscore
RNA_transport_(GO:0050658)	6/200	3.11645e-06	8.71161e-06	0.00254653	0.00698367	-1.20315	15.2545	RAD53;MCM7;CLB2;MCM3;MCM6;MCM2	GO Biological Process AutoRIF predicted Zscore
meiotic_sister_chromatid_cohesion_(GO:0051177)	6/200	3.11645e-06	8.71161e-06	0.00254653	0.00698367	-1.19543	15.1567	PDS1;SWI4;IRR1;CDC5;SMC3;SMC1	GO Biological Process AutoRIF predicted Zscore
N-terminal_protein_amino_acid_acetylation_(GO:0006474)	6/200	3.11645e-06	8.71161e-06	0.00254653	0.00698367	-1.19034	15.0921	CDC45;SWI4;IRR1;MCM6;SMC3;SMC1	GO Biological Process AutoRIF predicted Zscore
synapsis_(GO:0007129)	6/200	3.11645e-06	8.71161e-06	0.00254653	0.00698367	-1.18461	15.0195	PDS1;SWI4;IRR1;CDC5;SMC3;SMC1	GO Biological Process AutoRIF predicted Zscore
regulation_of_transposition_(GO:0010528)	6/200	3.11645e-06	8.71161e-06	0.00254653	0.00698367	-1.17451	14.8914	RAD53;MCM3;MCM5;IRR1;MCM6;MCM2	GO Biological Process AutoRIF predicted Zscore
regulation_of_establishment_or_maintenance_of_cell_polarity_(GO:0032878)	6/200	3.11645e-06	8.71161e-06	0.00254653	0.00698367	-1.16668	14.7921	RAD53;MCM3;SWI4;IRR1;MCM6;MCM2	GO Biological Process AutoRIF predicted Zscore
protein_localization_to_chromosome,_centromeric_region_(GO:0071459)	6/200	3.11645e-06	8.71161e-06	0.00254653	0.00698367	-1.16419	14.7605	CDC20;CLB6;SPO12;PDS1;IRR1;CDC5	GO Biological Process AutoRIF predicted Zscore
protein_polymerization_(GO:0051258)	6/200	3.11645e-06	8.71161e-06	0.00254653	0.00698367	-1.15495	14.6435	RAD53;SWI4;IRR1;MCM6;SMC3;MCM2	GO Biological Process AutoRIF predicted Zscore
cell_cycle_G1/S_phase_transition_(GO:0044843)	6/200	3.11645e-06	8.71161e-06	0.00254653	0.00698367	-1.14534	14.5216	RAD53;MCM3;SWI4;IRR1;MCM6;MCM2	GO Biological Process AutoRIF predicted Zscore
protein_localization_to_cell_cortex_(GO:0072697)	6/200	3.11645e-06	8.71161e-06	0.00254653	0.00698367	-1.14401	14.5047	RAD53;SWI5;MCM3;SWI4;MCM6;MCM2	GO Biological Process AutoRIF predicted Zscore
spindle_pole_body_duplication_(GO:0030474)	6/200	3.11645e-06	8.71161e-06	0.00254653	0.00698367	-1.12749	14.2952	CDC20;CLB6;PDS1;SWI4;IRR1;CDC5	GO Biological Process AutoRIF predicted Zscore
peptidyl-serine_phosphorylation_(GO:0018105)	6/200	3.11645e-06	8.71161e-06	0.00254653	0.00698367	-1.12544	14.2692	RAD53;PDS1;SWI4;IRR1;MCM6;MCM2	GO Biological Process AutoRIF predicted Zscore
phosphorylation_(GO:0016310)	6/200	3.11645e-06	8.71161e-06	0.00254653	0.00698367	-1.1207	14.2091	RAD53;PDS1;SWI4;IRR1;MCM6;MCM2	GO Biological Process AutoRIF predicted Zscore
cell_cycle_G2/M_phase_transition_(GO:0044839)	6/200	3.11645e-06	8.71161e-06	0.00254653	0.00698367	-1.10297	13.9844	RAD53;MCM3;SWI4;IRR1;MCM6;MCM2	GO Biological Process AutoRIF predicted Zscore
regulation_of_cytoplasmic_translational_elongation_(GO:1900247)	6/200	3.11645e-06	8.71161e-06	0.00254653	0.00698367	-1.0282	13.0364	RAD53;MCM7;CLB2;MCM3;MCM6;MCM2	GO Biological Process AutoRIF predicted Zscore
DNA_replication,_removal_of_RNA_primer_(GO:0043137)	6/200	3.11645e-06	8.71161e-06	0.00254653	0.00698367	-1.01991	12.9312	CDC20;CLB6;CLB5;CLB1;PDS1;CDC5	GO Biological Process AutoRIF predicted Zscore
protein_phosphorylation_(GO:0006468)	6/200	3.11645e-06	8.71161e-06	0.00254653	0.00698367	-0.983968	12.4756	RAD53;PDS1;SWI4;IRR1;MCM6;MCM2	GO Biological Process AutoRIF predicted Zscore
invasive_growth_in_response_to_glucose_limitation_(GO:0001403)	6/200	3.11645e-06	8.71161e-06	0.00254653	0.00698367	-0.948617	12.0273	RAD53;MCM3;SWI4;MCM4;MCM6;MCM2	GO Biological Process AutoRIF predicted Zscore
mitotic_cytokinetic_process_(GO:1902410)	6/200	3.11645e-06	8.71161e-06	0.00254653	0.00698367	-0.935067	11.8555	CDC20;CLB6;SPO12;CLB1;PDS1;CDC5	GO Biological Process AutoRIF predicted Zscore
regulation_of_cellular_localization_(GO:0060341)	5/108	2.68505e-06	8.76055e-06	0.00280755	0.00948165	-1.17265	15.0425	DBF2;CLB2;CDC28;CDC5;BUB1	GO Biological Process AutoRIF
position_of_spindle_pole_body	5/115	3.65826e-06	9.01181e-06	0.00526139	0.0161031	-0.818507	10.2465	CDC20;CLB6;PDS1;SWI4;MCM6	Phenotype AutoRIF predicted Zscore
glucan_biosynthetic_process_(GO:0009250)	6/200	3.11645e-06	1.00826e-05	0.00835436	0.0238254	-1.10974	14.0702	DUN1;DBF2;SWI4;CDC28;PCL2;PCL1	GO Biological Process AutoRIF
glucan_catabolic_process_(GO:0009251)	6/200	3.11645e-06	1.00826e-05	0.00835436	0.0238254	-1.10765	14.0437	DUN1;DBF2;SWI4;CDC28;PCL2;PCL1	GO Biological Process AutoRIF
replicative_cell_aging_(GO:0001302)	6/201	3.20751e-06	1.03056e-05	0.00854826	0.0242884	-1.09625	13.8676	RAD53;CDC45;CLB2;SWI4;BUB1;MCM2	GO Biological Process AutoRIF
maintenance_of_chromatin_silencing_(GO:0006344)	5/112	3.21212e-06	1.03056e-05	0.00326635	0.0107944	-1.03516	13.0933	RAD53;MCM7;MCD1;MCM3;MCM2	GO Biological Process AutoRIF
size_of_nucleus	5/119	4.32728e-06	1.04061e-05	0.00605014	0.0179725	-0.832974	10.2877	RAD53;CDC45;SWI4;MCM6;MCM2	Phenotype AutoRIF predicted Zscore
regulation_of_cellular_response_to_amino_acid_starvation_(GO:1903832)	6/202	3.30073e-06	1.05459e-05	0.0087454	0.0246665	-0.914887	11.5471	HSL1;PCL9;CDC28;PHO5;PCL2;PCL1	GO Biological Process AutoRIF
regulation_of_protein_localization_(GO:0032880)	5/113	3.35579e-06	1.06775e-05	0.00338905	0.011152	-1.17273	14.782	DBF2;CLB2;CDC28;CDC5;BUB1	GO Biological Process AutoRIF
DNA_metabolic_process_(GO:0006259)	6/203	3.39614e-06	1.07614e-05	0.00894582	0.0249575	-0.981635	12.3616	RAD53;CDC45;DUN1;CLB1;CDC28;MCM2	GO Biological Process AutoRIF
DNA_unwinding_involved_in_DNA_replication_(GO:0006268)	3/15	3.57655e-06	1.12867e-05	0.000464354	0.00203155	-1.41096	17.6951	CDC45;MCM4;MCM2	GO Biological Process AutoRIF
regulation_of_phosphoprotein_phosphatase_activity_(GO:0043666)	5/116	3.81731e-06	1.19973e-05	0.00377719	0.0123239	-1.17338	14.6391	CDC20;RAD53;DBF2;CLB2;CDC28	GO Biological Process AutoRIF
polyploidy	4/56	5.16743e-06	1.23569e-05	0.0045089	0.0137772	-0.717984	8.74011	CLB2;CDC28;BUB1;MCM1	Phenotype AutoRIF
mitotic nuclear division (GO:0140014)	4/47	2.54308e-06	1.27154e-05	0.00089995	0.00442473	-1.33758	17.2309	PDS1;CDC28;CDC5;SMC1	GO Biological Process 2018
protein-DNA_complex_subunit_organization_(GO:0071824)	5/118	4.15169e-06	1.29951e-05	0.00405314	0.0130789	-0.969871	12.0186	MCD1;MCM5;MCM6;SMC3;MCM2	GO Biological Process AutoRIF
chromosome organization (GO:0051276)	4/48	2.77016e-06	1.3543e-05	0.000968877	0.00444069	-1.48181	18.9622	MAD2;MRC1;MCM5;BUB1	GO Biological Process 2018
attachment_of_mitotic_spindle_microtubules_to_kinetochore_(GO:0051315)	4/54	4.46254e-06	1.39116e-05	0.00152646	0.00576165	-1.17387	14.4618	CDC20;PDS1;CDC28;BUB1	GO Biological Process AutoRIF
cellular_response_to_nitrogen_starvation_(GO:0006995)	6/214	4.60237e-06	1.42896e-05	0.0113751	0.0307328	-1.07248	13.1797	HSL1;RAD53;SIC1;CLB2;CDC28;PHO5	GO Biological Process AutoRIF
regulation_of_autophagy_(GO:0010506)	6/215	4.72738e-06	1.45603e-05	0.0116172	0.0311327	-1.02545	12.5742	RAD53;SIC1;MCD1;PDS1;CDC28;PCL1	GO Biological Process AutoRIF
regulation_of_macroautophagy_(GO:0016241)	6/215	4.72738e-06	1.45603e-05	0.0116172	0.0311327	-1.02411	12.5578	RAD53;SIC1;MCD1;PDS1;CDC28;PCL1	GO Biological Process AutoRIF
regulation_of_cellular_protein_localization_(GO:1903827)	5/122	4.88927e-06	1.49989e-05	0.00464812	0.0143737	-1.20072	14.6829	DBF2;CLB2;CDC28;CDC5;BUB1	GO Biological Process AutoRIF
regulation_of_mRNA_stability_(GO:0043488)	5/123	5.08879e-06	1.55491e-05	0.00480614	0.0147439	-0.92987	11.3337	RAD53;CLB2;SWI5;SWI4;CDC28	GO Biological Process AutoRIF
establishment_of_spindle_localization_(GO:0051293)	3/17	5.32996e-06	1.62216e-05	0.000640881	0.00267613	-1.35296	16.4279	CDC28;SMC3;BUB1	GO Biological Process AutoRIF
transcription_elongation_from_RNA_polymerase_II_promoter_(GO:0006368)	5/127	5.95168e-06	1.65731e-05	0.00193079	0.00602539	-1.16542	14.0221	RAD53;CDC45;MCM6;BUB1;MCM2	GO Biological Process AutoRIF predicted Zscore
telomere_maintenance_via_recombination_(GO:0000722)	5/129	6.42404e-06	1.77519e-05	0.00206334	0.006384	-0.980617	11.7237	HSL1;MRC1;SWI4;MCM6;BUB1	GO Biological Process AutoRIF predicted Zscore
regulation_of_ribosomal_protein_gene_transcription_from_RNA_polymerase_II_promoter_(GO:0060962)	5/129	6.42404e-06	1.77519e-05	0.00206334	0.006384	-0.857493	10.2517	HSL1;MRC1;GIN4;MCM6;MCM2	GO Biological Process AutoRIF predicted Zscore
regulation_of_adenylate_cyclase_activity_(GO:0045761)	4/58	5.95144e-06	1.80418e-05	0.00195701	0.00718992	-0.982404	11.8202	CDC20;SWI4;CDC28;PHO5	GO Biological Process AutoRIF
regulation_of_histone_acetylation_(GO:0035065)	5/130	6.67098e-06	2.01437e-05	0.00602165	0.0178333	-0.872489	10.3981	RAD53;MCD1;SWI4;CDC28;SMC3	GO Biological Process AutoRIF
protein_complex_subunit_organization_(GO:0071822)	7/353	6.74488e-06	2.02873e-05	0.0346054	0.079304	-1.01917	12.1349	MCD1;PDS1;CDC28;MCM5;MCM6;SMC3;MCM2	GO Biological Process AutoRIF
cellular_amino_acid_biosynthetic_process_(GO:0008652)	7/355	6.99834e-06	2.08865e-05	0.0355204	0.0802075	-0.853556	10.1316	CDC20;RAD53;CLN2;DUN1;MOB1;PDS1;CDC28	GO Biological Process AutoRIF
cellular_amino_acid_catabolic_process_(GO:0009063)	7/355	6.99834e-06	2.08865e-05	0.0355204	0.0802075	-0.850869	10.0997	CDC20;RAD53;CLN2;DUN1;MOB1;PDS1;CDC28	GO Biological Process AutoRIF
axial_cellular_bud_site_selection_(GO:0007120)	4/61	7.28789e-06	2.16667e-05	0.00233064	0.00823207	-1.07247	12.6866	MAD2;CLB2;CLB1;CDC28	GO Biological Process AutoRIF
vegetative_growth	5/140	9.57269e-06	2.24042e-05	0.0233368	0.0546181	-0.701919	8.1118	CLB2;CLB1;CDC28;FAR1;MCM1	Phenotype AutoRIF
telomere_capping_(GO:0016233)	4/62	7.77899e-06	2.30378e-05	0.0024654	0.00855118	-1.20185	14.1387	RAD53;DUN1;MRC1;CDC28	GO Biological Process AutoRIF
cold_sensitivity	5/142	1.0256e-05	2.40897e-05	0.0122838	0.0291377	-0.673619	7.7383	RAD53;CDC45;SWI4;MCM6;MCM2	Phenotype AutoRIF predicted Zscore
peptide_catabolic_process_(GO:0043171)	5/139	9.24467e-06	2.53528e-05	0.0028285	0.00766979	-0.912823	10.581	RAD53;MCM3;SWI4;MCM5;MCM2	GO Biological Process AutoRIF predicted Zscore
peptide_metabolic_process_(GO:0006518)	5/139	9.24467e-06	2.53528e-05	0.0028285	0.00766979	-0.911801	10.5691	RAD53;MCM3;SWI4;MCM5;MCM2	GO Biological Process AutoRIF predicted Zscore
positive regulation of mitotic cell cycle phase transition (GO:1901992)	3/17	5.32996e-06	2.54911e-05	0.000619558	0.00316983	-1.58688	19.2681	CDC20;CDC45;SPO12	GO Biological Process 2018
mating_efficiency	6/250	1.11959e-05	2.56572e-05	0.0680577	0.138636	-0.644937	7.35226	RAD53;CLB5;CLB2;CDC28;SWI4;FAR1	Phenotype AutoRIF
nucleosome_assembly_(GO:0006334)	5/138	8.92552e-06	2.6332e-05	0.00766106	0.0222604	-1.0134	11.7824	RAD53;CLB2;SWI4;CDC28;MCM2	GO Biological Process AutoRIF
galactose_catabolic_process_(GO:0019388)	5/139	9.24467e-06	2.70662e-05	0.00788592	0.0226573	-0.822064	9.52893	RAD53;SIC1;CLB2;PDS1;CDC28	GO Biological Process AutoRIF
galactose_metabolic_process_(GO:0006012)	5/139	9.24467e-06	2.70662e-05	0.00788592	0.0226573	-0.815717	9.45535	RAD53;SIC1;CLB2;PDS1;CDC28	GO Biological Process AutoRIF
response_to_amino_acid_(GO:0043200)	6/243	9.52513e-06	2.77816e-05	0.0199828	0.0505278	-0.911686	10.5405	RAD53;CLN2;DUN1;SWI4;CDC28;CDC5	GO Biological Process AutoRIF
filamentous_growth	5/150	1.33796e-05	3.00358e-05	0.0301059	0.0675847	-0.916592	10.2858	HSL1;RAD53;CLB2;CDC28;FAR1	Phenotype AutoRIF
regulation_of_spindle_pole_body_separation_(GO:0010695)	3/21	1.03655e-05	3.01187e-05	0.0011105	0.00436267	-1.35769	15.5822	CLB2;PDS1;CDC28	GO Biological Process AutoRIF
cellular_response_to_osmotic_stress_(GO:0071470)	5/143	1.06116e-05	3.06029e-05	0.00883175	0.0247289	-0.956027	10.9499	HSL1;RAD53;SIC1;MRC1;CDC28	GO Biological Process AutoRIF
regulation_of_actin_cytoskeleton_organization_(GO:0032956)	5/143	1.06116e-05	3.06029e-05	0.00883175	0.0247289	-0.881911	10.101	PCL9;MOB1;CDC28;PCL2;PCL1	GO Biological Process AutoRIF
cellular_ion_homeostasis_(GO:0006873)	7/380	1.08971e-05	3.13089e-05	0.0483637	0.104607	-1.04084	11.8937	DUN1;CLB2;SWI4;CDC28;PCL2;PCL1;MCM1	GO Biological Process AutoRIF
regulation_of_protein_complex_assembly_(GO:0043254)	5/145	1.13518e-05	3.24941e-05	0.00933314	0.0258508	-0.938081	10.6811	CDC20;RAD53;CLB2;CDC28;MCM2	GO Biological Process AutoRIF
regulation_of_transcription_initiation_from_RNA_polymerase_II_promoter_(GO:0060260)	5/148	1.25372e-05	3.41237e-05	0.00367765	0.00982516	-1.18363	13.3594	RAD53;MRC1;SWI4;MCM6;MCM2	GO Biological Process AutoRIF predicted Zscore
heterochromatin_organization_(GO:0070828)	5/148	1.25372e-05	3.41237e-05	0.00367765	0.00982516	-1.04969	11.8476	HSL1;MRC1;GIN4;KCC4;BUB1	GO Biological Process AutoRIF predicted Zscore
regulation_of_glycogen_biosynthetic_process_(GO:0005979)	6/254	1.22524e-05	3.48131e-05	0.0241844	0.0589304	-0.874906	9.895	RAD53;PCL9;SWI5;CDC28;PCL2;PCL1	GO Biological Process AutoRIF
regulation_of_glycogen_metabolic_process_(GO:0070873)	6/254	1.22524e-05	3.48131e-05	0.0241844	0.0589304	-0.871452	9.85593	RAD53;PCL9;SWI5;CDC28;PCL2;PCL1	GO Biological Process AutoRIF
histone_H4_acetylation_(GO:0043967)	5/148	1.25372e-05	3.54912e-05	0.0101218	0.0279348	-0.988226	11.1539	RAD53;CDC45;SWI4;CDC28;MCM2	GO Biological Process AutoRIF
critical_cell_size_at_START_(G1_cell-size_checkpoint)	5/155	1.56797e-05	3.5992e-05	0.0172824	0.0396711	-0.970233	10.7338	RAD53;PDS1;SWI4;IRR1;MCM2	Phenotype AutoRIF predicted Zscore
synaptonemal complex organization (GO:0070193)	3/20	8.8974e-06	3.91486e-05	0.000945284	0.00442473	-1.90001	22.0967	CDC28;CDC5;SMC3	GO Biological Process 2018
DNA duplex unwinding (GO:0032508)	3/20	8.8974e-06	3.91486e-05	0.000945284	0.00442473	-1.46006	16.9801	MCM7;MCM4;MCM6	GO Biological Process 2018
mitotic DNA integrity checkpoint (GO:0044774)	3/20	8.8974e-06	3.91486e-05	0.000945284	0.00442473	-1.34591	15.6526	MAD2;RAD53;DUN1	GO Biological Process 2018
chromatin silencing at telomere (GO:0006348)	4/64	8.83395e-06	3.91486e-05	0.00263768	0.00951296	-1.33193	15.4996	MCM7;MRC1;MCM3;MCM5	GO Biological Process 2018
transcription_initiation_from_RNA_polymerase_II_promoter_(GO:0006367)	5/153	1.47254e-05	3.99295e-05	0.00422197	0.0112379	-1.17046	13.0224	RAD53;CDC45;SWI4;MCM6;MCM2	GO Biological Process AutoRIF predicted Zscore
regulation_of_intracellular_signal_transduction_(GO:1902531)	6/261	1.4295e-05	4.03191e-05	0.0271505	0.0643258	-0.819876	9.14621	RAD53;DUN1;CDC28;FAR1;CDC5;BUB1	GO Biological Process AutoRIF
RNA_accumulation	6/275	1.92074e-05	4.22563e-05	0.0970016	0.183968	-0.52337	5.68391	RAD53;DUN1;CLB2;YOX1;PDS1;BUB1	Phenotype AutoRIF
cell_cycle_progression_through_the_G1/S_phase_transition	5/162	1.94055e-05	4.35545e-05	0.0204728	0.04595	-0.893586	9.69537	RAD53;SWI4;IRR1;MCM6;MCM2	Phenotype AutoRIF predicted Zscore
hyperosmotic_response_(GO:0006972)	5/155	1.56797e-05	4.40634e-05	0.0121394	0.0323437	-0.982768	10.8725	HSL1;SIC1;CLB5;CDC28;MCM1	GO Biological Process AutoRIF
positive_regulation_of_cellular_protein_localization_(GO:1903829)	4/74	1.57628e-05	4.41359e-05	0.00452405	0.0142142	-0.936759	10.3585	CDC20;RAD53;MCM5;BUB1	GO Biological Process AutoRIF
mitotic DNA damage checkpoint (GO:0044773)	3/21	1.03655e-05	4.4714e-05	0.00107385	0.00482138	-1.51361	17.3718	RAD53;DUN1;MRC1	GO Biological Process 2018
cAMP-mediated_signaling_(GO:0019933)	3/25	1.78235e-05	4.97249e-05	0.00175427	0.00658921	-1.17365	12.8338	PDS1;CDC28;CDC5	GO Biological Process AutoRIF
histone_methylation_(GO:0016571)	4/78	1.94258e-05	5.24786e-05	0.00227968	0.00698367	-1.25124	13.5746	CDC45;MRC1;MCM6;BUB1	GO Biological Process AutoRIF predicted Zscore
ion_homeostasis_(GO:0050801)	6/278	2.04192e-05	5.67609e-05	0.0353502	0.0802075	-0.853187	9.2136	DUN1;SWI4;CDC28;PHO5;PCL2;PCL1	GO Biological Process AutoRIF
regulation_of_histone_H2B_ubiquitination_(GO:2001166)	4/80	2.14752e-05	5.77993e-05	0.00249034	0.00698367	-1.16233	12.4934	MRC1;MCM6;BUB1;MCM2	GO Biological Process AutoRIF predicted Zscore
protein_modification_by_small_protein_removal_(GO:0070646)	3/27	2.26023e-05	6.26036e-05	0.00214786	0.00769233	-1.14857	12.2868	RAD53;DUN1;CDC28	GO Biological Process AutoRIF
kinetochore_organization_(GO:0051383)	4/82	2.36791e-05	6.34951e-05	0.00271407	0.00741503	-1.07697	11.4707	CLB5;MRC1;GIN4;BUB1	GO Biological Process AutoRIF predicted Zscore
mismatch_repair_(GO:0006298)	5/168	2.31185e-05	6.38037e-05	0.0165869	0.0432946	-0.884601	9.44301	MAD2;RAD53;DUN1;MRC1;SWI4	GO Biological Process AutoRIF
protein_glycosylation_(GO:0006486)	5/169	2.37876e-05	6.54159e-05	0.0169687	0.043993	-0.865489	9.2143	DUN1;SWI4;CDC28;PCL2;PCL1	GO Biological Process AutoRIF
leucine_biosynthetic_process_(GO:0009098)	6/287	2.44298e-05	6.65837e-05	0.040286	0.0886292	-1.16501	12.372	CDC20;RAD53;CDC45;MCM7;MRC1;MCM1	GO Biological Process AutoRIF
leucine_metabolic_process_(GO:0006551)	6/287	2.44298e-05	6.65837e-05	0.040286	0.0886292	-1.16495	12.3714	CDC20;RAD53;CDC45;MCM7;MRC1;MCM1	GO Biological Process AutoRIF
lipid_phosphorylation_(GO:0046834)	5/170	2.44717e-05	6.65837e-05	0.0173564	0.0446076	-0.850147	9.02686	CLB2;CDC28;GIN4;MCM6;MCM2	GO Biological Process AutoRIF
spore_germination	5/179	3.13418e-05	6.76e-05	0.0563489	0.1192	-0.456596	4.73516	CDC20;CLB2;CDC28;IRR1;MCM1	Phenotype AutoRIF
regulation_of_mRNA_metabolic_process_(GO:1903311)	5/173	2.66161e-05	7.11073e-05	0.00698691	0.0181372	-1.00546	10.5915	RAD53;MCM7;MCM3;MCM6;MCM2	GO Biological Process AutoRIF predicted Zscore
protein_processing_(GO:0016485)	5/174	2.73625e-05	7.28325e-05	0.00715204	0.0184931	-0.955904	10.0431	RAD53;SWI4;IRR1;MCM6;MCM2	GO Biological Process AutoRIF predicted Zscore
cell_wall_beta-glucan_biosynthetic_process_(GO:0034410)	6/292	2.69183e-05	7.29828e-05	0.0432117	0.0945256	-0.815369	8.57989	RAD53;DUN1;SWI4;CDC28;PCL2;PCL1	GO Biological Process AutoRIF
telomere_maintenance_via_telomerase_(GO:0007004)	4/86	2.85795e-05	7.57933e-05	0.00320236	0.00865114	-0.891097	9.32339	HSL1;MRC1;SWI4;BUB1	GO Biological Process AutoRIF predicted Zscore
regulation_of_chromatin_organization_(GO:1902275)	5/175	2.8125e-05	7.59868e-05	0.0193841	0.0495871	-0.947394	9.9276	RAD53;CDC45;CDC28;SMC3;MCM1	GO Biological Process AutoRIF
DNA_conformation_change_(GO:0071103)	5/177	2.96996e-05	7.81909e-05	0.00766393	0.0196067	-0.966199	10.072	RAD53;MCM3;SWI4;MCM6;MCM2	GO Biological Process AutoRIF predicted Zscore
regulation_of_cyclin-dependent_protein_kinase_activity_(GO:1904029)	5/177	2.96996e-05	7.81909e-05	0.00766393	0.0196067	-0.756507	7.88611	RAD53;PDS1;SWI4;IRR1;MCM2	GO Biological Process AutoRIF predicted Zscore
regulation_of_mating_type_switching_(GO:0031494)	4/87	2.99126e-05	8.05339e-05	0.00781093	0.0226106	-0.978062	10.1887	SWI5;SWI4;PCL1;MCM1	GO Biological Process AutoRIF
nuclear_pore_localization_(GO:0051664)	5/178	3.05121e-05	8.18617e-05	0.0206733	0.0516831	-0.894787	9.30345	CDC45;CLB2;SWI5;CDC28;BUB1	GO Biological Process AutoRIF
mitotic spindle assembly checkpoint (GO:0007094)	3/26	2.01196e-05	8.19687e-05	0.00188133	0.00778024	-1.76677	19.1056	CDC20;MAD2;BUB1	GO Biological Process 2018
regulation of mitotic cell cycle phase transition (GO:1901990)	3/26	2.01196e-05	8.19687e-05	0.00188133	0.00778024	-1.71428	18.5379	SPO12;MOB1;CDC28	GO Biological Process 2018
spindle assembly checkpoint (GO:0071173)	3/26	2.01196e-05	8.19687e-05	0.00188133	0.00778024	-1.53044	16.5499	CDC20;MAD2;BUB1	GO Biological Process 2018
base-excision_repair,_AP_site_formation_(GO:0006285)	4/88	3.12907e-05	8.20814e-05	0.00346771	0.00933316	-0.88593	9.18904	HSL1;MRC1;GIN4;BUB1	GO Biological Process AutoRIF predicted Zscore
regulation_of_attachment_of_spindle_microtubules_to_kinetochore_(GO:0051988)	3/30	3.12391e-05	8.35058e-05	0.00283432	0.00948883	-1.13129	11.7358	CDC20;CDC28;BUB1	GO Biological Process AutoRIF
DNA_repair_complex_assembly_(GO:0090735)	5/179	3.13418e-05	8.35058e-05	0.0211153	0.0526174	-0.971765	10.0777	CDC20;RAD53;DUN1;MRC1;CDC28	GO Biological Process AutoRIF
regulation_of_cytoskeleton_organization_(GO:0051493)	5/182	3.39365e-05	8.87004e-05	0.00857349	0.0217797	-0.794229	8.17342	RAD53;MCM3;SWI4;MCM6;MCM2	GO Biological Process AutoRIF predicted Zscore
regulation of exit from mitosis (GO:0007096)	3/27	2.26023e-05	9.04093e-05	0.00207786	0.00801981	-1.47071	15.7328	SPO12;MOB1;PDS1	GO Biological Process 2018
DNA repair (GO:0006281)	5/169	2.37876e-05	9.34513e-05	0.0162089	0.0424519	-1.22717	13.0649	RAD53;MRC1;MCD1;PDS1;SMC1	GO Biological Process 2018
tRNA_export_from_nucleus_(GO:0006409)	4/91	3.57047e-05	9.48022e-05	0.00907301	0.025221	-0.940086	9.6267	RAD53;CLN2;DBF2;SWI5	GO Biological Process AutoRIF
transcription_from_RNA_polymerase_II_promoter_(GO:0006366)	5/185	3.66949e-05	9.55652e-05	0.00915408	0.0230123	-1.02501	10.4683	RAD53;CDC45;SWI4;MCM6;MCM2	GO Biological Process AutoRIF predicted Zscore
regulation_of_hydrolase_activity_(GO:0051336)	6/308	3.62879e-05	9.60196e-05	0.0534759	0.114698	-0.883586	9.03381	RAD53;CLB2;PDS1;CDC28;CDC5;SMC3	GO Biological Process AutoRIF
regulation_of_cytoskeleton_organization_(GO:0051493)	5/186	3.76521e-05	9.9288e-05	0.0243851	0.0591278	-0.804252	8.19301	PCL9;MOB1;CDC28;PCL2;PCL1	GO Biological Process AutoRIF
budding_pattern	5/200	5.31996e-05	0.00010138	0.044622	0.0819423	-1.00309	9.87188	RAD53;MCM3;SWI4;MCM6;MCM2	Phenotype AutoRIF predicted Zscore
actin_cytoskeleton_morphology	5/200	5.31996e-05	0.00010138	0.044622	0.0819423	-0.834896	8.21659	RAD53;MCM3;SWI4;MCM4;MCM2	Phenotype AutoRIF predicted Zscore
sporulation_efficiency	5/200	5.31996e-05	0.00010138	0.044622	0.0819423	-0.686102	6.75224	CDC20;PDS1;SWI4;IRR1;CDC5	Phenotype AutoRIF predicted Zscore
RNA_accumulation	5/200	5.31996e-05	0.00010138	0.044622	0.0819423	-0.653598	6.43236	RAD53;CDC45;MCM3;MCM6;MCM2	Phenotype AutoRIF predicted Zscore
nuclear_import	5/200	5.31996e-05	0.00010138	0.044622	0.0819423	-0.619797	6.09971	RAD53;MCM7;CLB2;MCM3;MCM4	Phenotype AutoRIF predicted Zscore
nuclear_transport	5/200	5.31996e-05	0.00010138	0.044622	0.0819423	-0.619666	6.09842	RAD53;MCM3;MCM4;MCM6;MCM2	Phenotype AutoRIF predicted Zscore
spore_wall_formation	5/200	5.31996e-05	0.00010138	0.044622	0.0819423	-0.614421	6.0468	CDC20;CLB6;CLB1;PDS1;CDC5	Phenotype AutoRIF predicted Zscore
haploinsufficient	5/200	5.31996e-05	0.00010138	0.044622	0.0819423	-0.555418	5.46613	RAD53;MCM3;MCM4;MCM6;MCM2	Phenotype AutoRIF predicted Zscore
mating_projection_morphology	4/99	4.96977e-05	0.00010513	0.0287548	0.0658963	-0.653758	6.47845	DBF2;MOB1;CDC28;FAR1	Phenotype AutoRIF
positive_regulation_of_cellular_process_(GO:0048522)	5/191	4.27319e-05	0.000110889	0.0103965	0.0258662	-0.716194	7.20532	RAD53;MCM3;SWI4;MCM6;MCM2	GO Biological Process AutoRIF predicted Zscore
regulation_of_MAPK_cascade_(GO:0043408)	5/191	4.27319e-05	0.000112299	0.0269126	0.063959	-0.876583	8.81892	RAD53;SWI4;CDC28;FAR1;MCM1	GO Biological Process AutoRIF
transcription-coupled_nucleotide-excision_repair_(GO:0006283)	4/96	4.40519e-05	0.000113906	0.00467955	0.0124102	-1.09677	11.0008	HSL1;MRC1;GIN4;BUB1	GO Biological Process AutoRIF predicted Zscore
protein_localization_to_bud_neck_(GO:0097271)	5/193	4.49064e-05	0.000115702	0.0108354	0.0268658	-0.817983	8.18878	CDC20;RAD53;PDS1;SWI4;MCM2	GO Biological Process AutoRIF predicted Zscore
lysine_biosynthetic_process_(GO:0009085)	6/320	4.49065e-05	0.000117612	0.062093	0.129571	-0.9351	9.36122	CDC20;RAD53;CDC45;MCM7;SMC3;MCM2	GO Biological Process AutoRIF
nucleotide-excision_repair,_DNA_incision_(GO:0033683)	4/97	4.58787e-05	0.000117747	0.00484873	0.012812	-0.897909	8.96967	HSL1;MRC1;GIN4;BUB1	GO Biological Process AutoRIF predicted Zscore
positive_regulation_of_gene_expression,_epigenetic_(GO:0045815)	5/194	4.60252e-05	0.000117747	0.0110596	0.027328	-0.859797	8.58621	HSL1;MRC1;GIN4;BUB1;SMC1	GO Biological Process AutoRIF predicted Zscore
spore_wall_formation	5/203	5.70964e-05	0.000118502	0.0858102	0.165599	-0.451096	4.40756	CDC20;CLB2;CLB1;CDC28;SWI4	Phenotype AutoRIF
nuclear_transport_(GO:0051169)	5/200	5.31996e-05	0.000122275	0.0124722	0.02787	-1.28291	12.6257	RAD53;MCM3;MCM4;MCM6;MCM2	GO Biological Process AutoRIF predicted Zscore
mitochondrial_ATP_synthesis_coupled_electron_transport_(GO:0042775)	5/200	5.31996e-05	0.000122275	0.0124722	0.02787	-1.15471	11.364	RAD53;MCM7;MCM3;SWI4;MCM4	GO Biological Process AutoRIF predicted Zscore
nuclear_import_(GO:0051170)	5/200	5.31996e-05	0.000122275	0.0124722	0.02787	-1.09674	10.7936	RAD53;MCM7;CLB2;MCM3;MCM4	GO Biological Process AutoRIF predicted Zscore
negative_regulation_of_meiosis_I_(GO:0110029)	5/200	5.31996e-05	0.000122275	0.0124722	0.02787	-1.0783	10.612	PDS1;SWI4;IRR1;CDC5;SMC3	GO Biological Process AutoRIF predicted Zscore
Golgi_vesicle_transport_(GO:0048193)	5/200	5.31996e-05	0.000122275	0.0124722	0.02787	-1.06096	10.4414	RAD53;SWI4;MCM4;MCM5;MCM2	GO Biological Process AutoRIF predicted Zscore
cytoskeleton_organization_(GO:0007010)	5/200	5.31996e-05	0.000122275	0.0124722	0.02787	-1.05145	10.3478	RAD53;SWI4;IRR1;MCM6;MCM2	GO Biological Process AutoRIF predicted Zscore
synaptonemal_complex_assembly_(GO:0007130)	5/200	5.31996e-05	0.000122275	0.0124722	0.02787	-1.05061	10.3396	PDS1;SWI4;IRR1;SMC3;SMC1	GO Biological Process AutoRIF predicted Zscore
regulation_of_transcription_from_RNA_polymerase_III_promoter_(GO:0006359)	5/200	5.31996e-05	0.000122275	0.0124722	0.02787	-1.03819	10.2173	RAD53;MCM3;SWI4;MCM6;MCM2	GO Biological Process AutoRIF predicted Zscore
telomere_tethering_at_nuclear_periphery_(GO:0034398)	4/100	5.1692e-05	0.000122275	0.00538099	0.0141667	-1.0233	10.1002	HSL1;MRC1;SWI4;BUB1	GO Biological Process AutoRIF predicted Zscore
negative_regulation_of_meiotic_cell_cycle_(GO:0051447)	5/200	5.31996e-05	0.000122275	0.0124722	0.02787	-1.02274	10.0653	PDS1;SWI4;IRR1;SMC3;MCM2	GO Biological Process AutoRIF predicted Zscore
protein_export_from_nucleus_(GO:0006611)	5/200	5.31996e-05	0.000122275	0.0124722	0.02787	-1.00753	9.9156	RAD53;MCM7;CLB2;MCM3;MCM4	GO Biological Process AutoRIF predicted Zscore
protein_import_into_nucleus_(GO:0006606)	5/200	5.31996e-05	0.000122275	0.0124722	0.02787	-0.984521	9.68913	RAD53;MCM7;CLB2;MCM3;MCM4	GO Biological Process AutoRIF predicted Zscore
L-phenylalanine_catabolic_process_(GO:0006559)	5/200	5.31996e-05	0.000122275	0.0124722	0.02787	-0.976772	9.61286	RAD53;MCM7;CLB2;MCM3;MCM4	GO Biological Process AutoRIF predicted Zscore
regulation_of_cytokinesis_(GO:0032465)	5/200	5.31996e-05	0.000122275	0.0124722	0.02787	-0.973875	9.58435	RAD53;PDS1;SWI4;MCM6;MCM2	GO Biological Process AutoRIF predicted Zscore
intracellular_mRNA_localization_(GO:0008298)	5/200	5.31996e-05	0.000122275	0.0124722	0.02787	-0.973433	9.58	RAD53;MCM7;CLB2;MCM3;MCM4	GO Biological Process AutoRIF predicted Zscore
nucleocytoplasmic_transport_(GO:0006913)	5/200	5.31996e-05	0.000122275	0.0124722	0.02787	-0.969727	9.54353	RAD53;MCM7;CLB2;MCM3;MCM4	GO Biological Process AutoRIF predicted Zscore
regulation_of_mRNA_stability_(GO:0043488)	5/200	5.31996e-05	0.000122275	0.0124722	0.02787	-0.969348	9.5398	RAD53;MCM7;MCM3;MCM6;MCM2	GO Biological Process AutoRIF predicted Zscore
L-phenylalanine_metabolic_process_(GO:0006558)	5/200	5.31996e-05	0.000122275	0.0124722	0.02787	-0.967946	9.526	RAD53;MCM7;CLB2;MCM3;MCM4	GO Biological Process AutoRIF predicted Zscore
transcription_from_RNA_polymerase_I_promoter_(GO:0006360)	5/200	5.31996e-05	0.000122275	0.0124722	0.02787	-0.924284	9.0963	RAD53;CLB2;MCM3;MCM6;MCM2	GO Biological Process AutoRIF predicted Zscore
tRNA_aminoacylation_for_mitochondrial_protein_translation_(GO:0070127)	5/200	5.31996e-05	0.000122275	0.0124722	0.02787	-0.897681	8.83449	RAD53;MCM7;CLB2;MCM3;MCM6	GO Biological Process AutoRIF predicted Zscore
RNA_catabolic_process_(GO:0006401)	5/200	5.31996e-05	0.000122275	0.0124722	0.02787	-0.894473	8.80292	RAD53;CDC45;SWI4;MCM6;MCM2	GO Biological Process AutoRIF predicted Zscore
regulation_of_cell_size_(GO:0008361)	5/200	5.31996e-05	0.000122275	0.0124722	0.02787	-0.893738	8.79568	RAD53;PDS1;SWI4;IRR1;MCM2	GO Biological Process AutoRIF predicted Zscore
regulation_of_cellular_component_organization_(GO:0051128)	5/200	5.31996e-05	0.000122275	0.0124722	0.02787	-0.879818	8.6587	RAD53;SWI4;IRR1;MCM6;MCM2	GO Biological Process AutoRIF predicted Zscore
lipid_particle_organization_(GO:0034389)	5/200	5.31996e-05	0.000122275	0.0124722	0.02787	-0.867352	8.53601	RAD53;MCM3;MCM4;MCM6;MCM2	GO Biological Process AutoRIF predicted Zscore
positive_regulation_of_mitotic_cell_cycle_phase_transition_(GO:1901992)	5/200	5.31996e-05	0.000122275	0.0124722	0.02787	-0.841592	8.28249	CDC20;CLB6;CLB5;CLB1;PDS1	GO Biological Process AutoRIF predicted Zscore
organelle_disassembly_(GO:1903008)	5/200	5.31996e-05	0.000122275	0.0124722	0.02787	-0.836635	8.23371	RAD53;SWI4;IRR1;MCM6;MCM2	GO Biological Process AutoRIF predicted Zscore
transcription_initiation_from_RNA_polymerase_III_promoter_(GO:0006384)	5/200	5.31996e-05	0.000122275	0.0124722	0.02787	-0.830791	8.1762	HSL1;MRC1;GIN4;MCM6;BUB1	GO Biological Process AutoRIF predicted Zscore
establishment_of_protein_localization_to_organelle_(GO:0072594)	5/200	5.31996e-05	0.000122275	0.0124722	0.02787	-0.828526	8.1539	RAD53;SWI4;MCM4;MCM6;MCM2	GO Biological Process AutoRIF predicted Zscore
regulation_of_cellular_catabolic_process_(GO:0031329)	5/200	5.31996e-05	0.000122275	0.0124722	0.02787	-0.826163	8.13065	RAD53;MCM3;SWI4;MCM6;MCM2	GO Biological Process AutoRIF predicted Zscore
regulation_of_cellular_biosynthetic_process_(GO:0031326)	5/200	5.31996e-05	0.000122275	0.0124722	0.02787	-0.825892	8.12798	RAD53;MCM3;SWI4;MCM6;MCM2	GO Biological Process AutoRIF predicted Zscore
maintenance_of_DNA_trinucleotide_repeats_(GO:0035753)	5/200	5.31996e-05	0.000122275	0.0124722	0.02787	-0.823697	8.10638	SWI4;IRR1;MCM6;SMC3;MCM2	GO Biological Process AutoRIF predicted Zscore
mRNA_catabolic_process_(GO:0006402)	5/200	5.31996e-05	0.000122275	0.0124722	0.02787	-0.82255	8.09509	RAD53;CDC45;SWI4;MCM6;MCM2	GO Biological Process AutoRIF predicted Zscore
branched-chain_amino_acid_biosynthetic_process_(GO:0009082)	5/196	4.83277e-05	0.000125717	0.029604	0.0690759	-1.06174	10.5511	CDC20;MAD2;CDC28;MCM5;MCM2	GO Biological Process AutoRIF
branched-chain_amino_acid_metabolic_process_(GO:0009081)	5/196	4.83277e-05	0.000125717	0.029604	0.0690759	-1.06172	10.5508	CDC20;MAD2;CDC28;MCM5;MCM2	GO Biological Process AutoRIF
negative_regulation_of_macroautophagy_(GO:0016242)	3/36	5.44703e-05	0.000140275	0.00457809	0.0142142	-1.1965	11.747	SIC1;CDC28;PCL1	GO Biological Process AutoRIF
negative_regulation_of_autophagy_(GO:0010507)	3/36	5.44703e-05	0.000140275	0.00457809	0.0142142	-1.17356	11.5219	SIC1;CDC28;PCL1	GO Biological Process AutoRIF
positive_regulation_of_protein_localization_to_nucleus_(GO:1900182)	3/36	5.44703e-05	0.000140275	0.00457809	0.0142142	-0.994836	9.76716	CDC20;RAD53;MCM5	GO Biological Process AutoRIF
nucleosome_disassembly_(GO:0006337)	5/202	5.57737e-05	0.000143153	0.0330542	0.0764315	-0.785668	7.69499	RAD53;CLB2;CDC28;SMC3;MCM2	GO Biological Process AutoRIF
sporulation	4/109	7.2369e-05	0.000147418	0.0386024	0.0849252	-0.545832	5.20382	SPO12;CLB2;CLB1;CDC28	Phenotype AutoRIF
cellular_response_to_starvation_(GO:0009267)	4/103	5.8026e-05	0.000148439	0.0136404	0.0360933	-1.02764	10.0243	HSL1;RAD53;CLB2;CDC28	GO Biological Process AutoRIF
synaptonemal_complex_assembly_(GO:0007130)	3/37	5.91922e-05	0.000149928	0.00491941	0.0149132	-1.11926	10.8957	MCD1;PDS1;SMC3	GO Biological Process AutoRIF
negative_regulation_of_meiotic_nuclear_division_(GO:0045835)	3/37	5.91922e-05	0.000149928	0.00491941	0.0149132	-1.05217	10.2426	CLB5;CDC28;CDC5	GO Biological Process AutoRIF
positive_regulation_of_histone_acetylation_(GO:0035066)	3/37	5.91922e-05	0.000149928	0.00491941	0.0149132	-0.961198	9.357	RAD53;CDC28;BUB1	GO Biological Process AutoRIF
regulation_of_translation_in_response_to_stress_(GO:0043555)	5/205	5.98144e-05	0.000151007	0.0348709	0.0796753	-0.784111	7.6249	RAD53;CLN2;SWI4;CDC28;PCL1	GO Biological Process AutoRIF
telomere_localization_(GO:0034397)	4/104	6.02579e-05	0.000151629	0.0140765	0.0371196	-0.802998	7.80263	RAD53;DUN1;CDC28;CDC5	GO Biological Process AutoRIF
arginine_biosynthetic_process_(GO:0006526)	4/107	6.733e-05	0.000153776	0.00677276	0.0177021	-0.877202	8.42632	RAD53;MCM3;MCM6;MCM1	GO Biological Process AutoRIF predicted Zscore
arginine_metabolic_process_(GO:0006525)	4/107	6.733e-05	0.000153776	0.00677276	0.0177021	-0.850787	8.17258	RAD53;MCM3;MCM6;MCM1	GO Biological Process AutoRIF predicted Zscore
nuclear_morphology	4/113	8.3264e-05	0.000155734	0.024939	0.0547575	-0.758002	7.12029	RAD53;SWI4;MCM6;MCM2	Phenotype AutoRIF predicted Zscore
chromatin_silencing_at_telomere_(GO:0006348)	5/207	6.26314e-05	0.000157089	0.0361163	0.0813145	-1.077	10.4235	RAD53;CDC45;DUN1;MCM5;MCM2	GO Biological Process AutoRIF
telomere_maintenance_via_telomere_lengthening_(GO:0010833)	4/108	6.98163e-05	0.000158953	0.00698935	0.0181372	-0.791216	7.57165	HSL1;MRC1;GIN4;BUB1	GO Biological Process AutoRIF predicted Zscore
regulation_of_cell_aging_(GO:0090342)	5/209	6.55499e-05	0.000163875	0.0373894	0.0834949	-0.899957	8.66901	RAD53;CLB2;MCM3;SWI4;MCM2	GO Biological Process AutoRIF
DNA_replication,_Okazaki_fragment_processing_(GO:0033567)	3/39	6.94233e-05	0.000172439	0.00564731	0.0167893	-1.17057	11.2085	RAD53;MRC1;SMC3	GO Biological Process AutoRIF
positive_regulation_of_dephosphorylation_(GO:0035306)	3/39	6.94233e-05	0.000172439	0.00564731	0.0167893	-1.02366	9.80188	CDC20;RAD53;CDC28	GO Biological Process AutoRIF
cellular_response_to_heat_(GO:0034605)	6/351	7.49524e-05	0.000185574	0.0880571	0.174374	-0.866201	8.22775	MAD2;RAD53;SIC1;DUN1;CDC28;PCL1	GO Biological Process AutoRIF
protein_acylation_(GO:0043543)	4/111	7.76774e-05	0.000191091	0.0173796	0.0446076	-1.01001	9.55764	RAD53;MCD1;CDC28;SMC3	GO Biological Process AutoRIF
intracellular_mRNA_localization_(GO:0008298)	4/111	7.76774e-05	0.000191091	0.0173796	0.0446076	-0.91939	8.70014	CLB2;SWI5;MCM3;CDC28	GO Biological Process AutoRIF
regulation_of_Ras_protein_signal_transduction_(GO:0046578)	5/217	7.82892e-05	0.000191983	0.0427602	0.0938044	-0.730738	6.90921	CDC20;RAD53;DBF2;CDC28;CDC5	GO Biological Process AutoRIF
DNA_metabolic_process_(GO:0006259)	4/114	8.61643e-05	0.000195558	0.00838615	0.0213788	-0.984624	9.21534	RAD53;SWI4;MCM6;MCM2	GO Biological Process AutoRIF predicted Zscore
septin_cytoskeleton_organization_(GO:0032185)	3/41	8.07473e-05	0.000197382	0.00643674	0.0189896	-0.942944	8.88648	HSL1;CDC28;GIN4	GO Biological Process AutoRIF
regulation_of_DNA-dependent_DNA_replication_(GO:0090329)	4/116	9.21847e-05	0.000208568	0.00888977	0.0224258	-0.788875	7.33001	HSL1;MRC1;GIN4;BUB1	GO Biological Process AutoRIF predicted Zscore
septin_ring_organization_(GO:0031106)	3/42	8.68349e-05	0.000211591	0.00685494	0.0199936	-1.03141	9.64521	DBF2;CDC28;GIN4	GO Biological Process AutoRIF
RNA_localization	6/375	0.000107801	0.000215602	0.265449	0.42318	-0.353587	3.2301	CLB2;SWI5;PDS1;CDC28;SWI4;BUB1	Phenotype AutoRIF
DNA_biosynthetic_process_(GO:0071897)	4/118	9.85053e-05	0.000222174	0.00941292	0.0235812	-0.851711	7.85737	RAD53;SWI4;MCM6;MCM2	GO Biological Process AutoRIF predicted Zscore
cellular_response_to_nitrogen_levels_(GO:0043562)	4/116	9.21847e-05	0.000223919	0.0200143	0.0505278	-0.842731	7.83042	CLB5;CLB2;CLB1;SWI4	GO Biological Process AutoRIF
temperature_sensitive_growth	4/123	0.00011568	0.000227229	0.0553038	0.1192	-0.482932	4.37762	RAD53;CLB2;PDS1;CDC28	Phenotype AutoRIF
regulation of mating type switching (GO:0031494)	2/6	6.11839e-05	0.000228143	0.00198042	0.00778024	-2.22952	21.63	SWI5;MCM1	GO Biological Process 2018
regulation of nuclear cell cycle DNA replication (GO:0033262)	2/6	6.11839e-05	0.000228143	0.00198042	0.00778024	-2.02225	19.6191	MRC1;CDC28	GO Biological Process 2018
regulation of spindle assembly (GO:0090169)	2/6	6.11839e-05	0.000228143	0.00198042	0.00778024	-1.73974	16.8783	CLB5;CDC28	GO Biological Process 2018
nucleosome_organization_(GO:0034728)	4/119	0.000101781	0.000228849	0.00968191	0.0241714	-0.938117	8.62381	MRC1;MCM6;BUB1;MCM2	GO Biological Process AutoRIF predicted Zscore
response_to_ionizing_radiation_(GO:0010212)	4/117	9.53069e-05	0.000230775	0.0205694	0.051591	-0.909786	8.42317	RAD53;DUN1;CDC28;SMC3	GO Biological Process AutoRIF
gamma_ray_resistance	4/127	0.000130908	0.000240395	0.0358981	0.0771426	-0.944327	8.44324	SWI4;IRR1;MCM6;MCM2	Phenotype AutoRIF predicted Zscore
TOR_signaling_(GO:0031929)	5/230	0.000102971	0.000248551	0.0524518	0.112815	-0.935407	8.58803	HSL1;RAD53;DUN1;DBF2;CLB2	GO Biological Process AutoRIF
nucleosome_mobilization_(GO:0042766)	4/120	0.000105135	0.000252982	0.0222919	0.0553701	-0.940173	8.61223	RAD53;CLB2;CDC28;MCM1	GO Biological Process AutoRIF
regulation_of_cell_size_(GO:0008361)	4/121	0.000108569	0.000259622	0.0228852	0.0564795	-0.793673	7.24474	CLN2;SWI4;CDC28;SMC3	GO Biological Process AutoRIF
phosphorylation_of_RNA_polymerase_II_C-terminal_domain_(GO:0070816)	4/121	0.000108569	0.000259622	0.0228852	0.0564795	-0.770938	7.03722	RAD53;CLB2;SWI4;CDC28	GO Biological Process AutoRIF
chromatin_assembly_(GO:0031497)	4/122	0.000112084	0.000267196	0.0234882	0.0577825	-0.845186	7.68804	RAD53;CDC45;CDC28;MCM2	GO Biological Process AutoRIF
negative_regulation_of_transcription_by_pheromones_(GO:0045996)	3/46	0.00011417	0.00027133	0.00868781	0.0245942	-0.938077	8.51569	SIC1;CDC28;MCM1	GO Biological Process AutoRIF
mitotic spindle checkpoint (GO:0071174)	3/40	7.49455e-05	0.0002748	0.0058429	0.0183634	-1.37903	13.0991	CDC20;MAD2;BUB1	GO Biological Process 2018
RNA_transport_(GO:0050658)	6/384	0.000122728	0.00029077	0.121499	0.225826	-0.676211	6.08965	CDC45;SWI5;SWI4;CDC28;BUB1;MCM2	GO Biological Process AutoRIF
replication fork protection (GO:0048478)	2/7	8.55462e-05	0.000298495	0.00253232	0.00928518	-2.07315	19.4181	DUN1;MRC1	GO Biological Process 2018
positive regulation of reproductive process (GO:2000243)	2/7	8.55462e-05	0.000298495	0.00253232	0.00928518	-2.02711	18.9868	SWI5;CDC28	GO Biological Process 2018
positive regulation of DNA metabolic process (GO:0051054)	2/7	8.55462e-05	0.000298495	0.00253232	0.00928518	-1.99897	18.7233	CLB6;CLB5	GO Biological Process 2018
chromatin silencing at silent mating-type cassette (GO:0030466)	3/42	8.68349e-05	0.000298495	0.00663849	0.0200064	-1.4837	13.8748	MCM7;MRC1;MCM3	GO Biological Process 2018
regulation_of_protein_sumoylation_(GO:0033233)	4/126	0.000126973	0.000299904	0.0259974	0.0623615	-0.941931	8.45057	MAD2;MRC1;CDC28;CDC5	GO Biological Process AutoRIF
translesion_synthesis_(GO:0019985)	4/130	0.000143246	0.000337307	0.0286638	0.0672901	-0.707019	6.25779	RAD53;DUN1;CDC28;MCM5	GO Biological Process AutoRIF
regulation_of_cyclin-dependent_protein_serine/threonine_kinase_activity_(GO:0000079)	2/9	0.00014627	0.000342012	0.00391479	0.0127189	-1.3463	11.8879	CDC28;GIN4	GO Biological Process AutoRIF
proteasome_regulatory_particle_assembly_(GO:0070682)	3/50	0.000146577	0.000342012	0.010783	0.029443	-1.04272	9.20509	SIC1;CLB2;PDS1	GO Biological Process AutoRIF
translation_reinitiation_(GO:0002188)	3/50	0.000146577	0.000342012	0.010783	0.029443	-0.907967	8.0155	CLB2;MCM3;MCM2	GO Biological Process AutoRIF
regulation_of_transcription_elongation_from_RNA_polymerase_II_promoter_(GO:0034243)	4/133	0.000156405	0.00035058	0.0139877	0.0311603	-1.00304	8.7897	RAD53;SWI4;MCM6;MCM2	GO Biological Process AutoRIF predicted Zscore
positive_regulation_of_protein_complex_assembly_(GO:0031334)	3/51	0.000155516	0.000361775	0.0113487	0.0307328	-0.94004	8.24299	RAD53;SWI4;CDC28	GO Biological Process AutoRIF
mitochondrial_mRNA_processing_(GO:0090615)	4/134	0.00016098	0.000373357	0.0314891	0.073032	-0.759652	6.63498	CLB5;CLB2;CLB1;CDC5	GO Biological Process AutoRIF
meiotic sister chromatid cohesion (GO:0051177)	2/8	0.000113913	0.000385553	0.00314809	0.0111706	-1.94834	17.691	SMC3;BUB1	GO Biological Process 2018
termination_of_RNA_polymerase_II_transcription_(GO:0006369)	4/138	0.00018025	0.000402782	0.01578	0.0350453	-0.666369	5.74487	HSL1;MCD1;MCM6;MCM2	GO Biological Process AutoRIF predicted Zscore
sister chromatid segregation (GO:0000819)	3/47	0.000121781	0.000405937	0.00889974	0.0257624	-1.56926	14.1442	PDS1;BUB1;SMC1	GO Biological Process 2018
proteasomal_protein_catabolic_process_(GO:0010498)	4/138	0.00018025	0.000416795	0.0344748	0.0792406	-0.717953	6.18959	CDC20;SIC1;CLB2;PDS1	GO Biological Process AutoRIF
establishment_of_mitotic_spindle_localization_(GO:0040001)	2/10	0.0001826	0.000420963	0.00467178	0.0143891	-1.26787	10.9141	SMC3;BUB1	GO Biological Process AutoRIF
histone_H3_acetylation_(GO:0043966)	4/139	0.000185317	0.000425953	0.0352464	0.0802075	-0.765471	6.57803	RAD53;CDC45;CDC28;MCM2	GO Biological Process AutoRIF
phosphatidylserine_metabolic_process_(GO:0006658)	5/262	0.000189262	0.000433725	0.0814596	0.164199	-0.771553	6.61405	HSL1;CLB2;PDS1;CDC28;GIN4	GO Biological Process AutoRIF
protein_modification_by_small_protein_conjugation_(GO:0032446)	3/55	0.000194806	0.000433967	0.00718268	0.0185063	-1.0613	9.06723	SWI4;BUB1;SMC1	GO Biological Process AutoRIF predicted Zscore
regulation_of_chromatin_silencing_at_telomere_(GO:0031938)	4/141	0.000195758	0.000447282	0.03682	0.0826571	-0.912145	7.78847	RAD53;DUN1;MCM5;MCM2	GO Biological Process AutoRIF
regulation of meiotic cell cycle (GO:0051445)	2/9	0.00014627	0.000480289	0.00382663	0.0133628	-1.95376	17.2518	CDC20;CDC28	GO Biological Process 2018
RNA_stabilization_(GO:0043489)	5/270	0.0002176	0.000495716	0.0898485	0.176939	-0.715907	6.03714	CDC20;CLN2;SIC1;CDC28;FAR1	GO Biological Process AutoRIF
cell_septum_assembly_(GO:0090529)	3/58	0.000228143	0.000514131	0.0157868	0.0413464	-0.875077	7.33799	CLB2;CDC28;PCL1	GO Biological Process AutoRIF
purine_nucleotide_biosynthetic_process_(GO:0006164)	5/273	0.000229022	0.000514131	0.0931093	0.181504	-0.72956	6.11495	MCM4;MCM5;MCM6;SMC3;MCM2	GO Biological Process AutoRIF
purine_nucleotide_metabolic_process_(GO:0006163)	5/273	0.000229022	0.000514131	0.0931093	0.181504	-0.728066	6.10242	MCM4;MCM5;MCM6;SMC3;MCM2	GO Biological Process AutoRIF
purine_ribonucleotide_biosynthetic_process_(GO:0009152)	5/273	0.000229022	0.000514131	0.0931093	0.181504	-0.693164	5.80989	MCM4;MCM5;MCM6;SMC3;MCM2	GO Biological Process AutoRIF
protein_ubiquitination_involved_in_ubiquitin-dependent_protein_catabolic_process_(GO:0042787)	3/58	0.000228143	0.000514131	0.0157868	0.0413464	-0.668968	5.60966	CDC28;PCL2;PCL1	GO Biological Process AutoRIF
negative_regulation_of_telomerase_activity_(GO:0051974)	3/59	0.000240024	0.000533059	0.00863944	0.0218705	-1.15785	9.65046	MRC1;SWI4;BUB1	GO Biological Process AutoRIF predicted Zscore
cytoskeleton_organization_(GO:0007010)	4/149	0.000241806	0.000539682	0.0435204	0.0946631	-0.680135	5.66374	CLN2;CLB5;DBF2;CDC28	GO Biological Process AutoRIF
ion_transport_(GO:0006811)	4/149	0.000241806	0.000539682	0.0435204	0.0946631	-0.672687	5.60172	DUN1;CDC28;PCL2;PCL1	GO Biological Process AutoRIF
positive regulation of macromolecule biosynthetic process (GO:0010557)	2/10	0.0001826	0.000557943	0.00456686	0.0147751	-2.06445	17.7713	CLB6;CLB5	GO Biological Process 2018
peptidyl-threonine phosphorylation (GO:0018107)	2/10	0.0001826	0.000557943	0.00456686	0.0147751	-1.80339	15.524	DUN1;CDC28	GO Biological Process 2018
regulation of DNA replication (GO:0006275)	2/10	0.0001826	0.000557943	0.00456686	0.0147751	-1.80221	15.5138	CLB6;CLB5	GO Biological Process 2018
peptidyl-threonine modification (GO:0018210)	2/10	0.0001826	0.000557943	0.00456686	0.0147751	-1.74615	15.0312	DUN1;CDC28	GO Biological Process 2018
regulation of mitotic spindle organization (GO:0060236)	2/10	0.0001826	0.000557943	0.00456686	0.0147751	-1.62118	13.9555	CLB5;CLB2	GO Biological Process 2018
temperature_sensitive_growth	4/159	0.000309753	0.000558661	0.0701712	0.126559	-0.300291	2.42627	RAD53;MCM7;MCM3;MCM4	Phenotype AutoRIF predicted Zscore
leading_strand_elongation_(GO:0006272)	4/153	0.000267539	0.000592349	0.0220087	0.0485802	-0.713315	5.86791	HSL1;MRC1;GIN4;BUB1	GO Biological Process AutoRIF predicted Zscore
UV_resistance	4/159	0.000309753	0.000597768	0.113447	0.211482	-0.420803	3.39998	RAD53;DUN1;PDS1;CDC28	Phenotype AutoRIF
inositol_phosphate_biosynthetic_process_(GO:0032958)	5/283	0.000270426	0.000598357	0.104424	0.19952	-0.570251	4.68491	RAD53;DUN1;CDC28;PHO5;MCM1	GO Biological Process AutoRIF
inositol_phosphate_catabolic_process_(GO:0071545)	5/283	0.000270426	0.000598357	0.104424	0.19952	-0.567603	4.66315	RAD53;DUN1;CDC28;PHO5;MCM1	GO Biological Process AutoRIF
inositol_phosphate_metabolic_process_(GO:0043647)	5/283	0.000270426	0.000598357	0.104424	0.19952	-0.566506	4.65413	RAD53;DUN1;CDC28;PHO5;MCM1	GO Biological Process AutoRIF
mitochondrial_genome_maintenance	4/160	0.000317226	0.000601636	0.115354	0.211482	-0.522762	4.21132	RAD53;MCM3;CDC28;MCM2	Phenotype AutoRIF
pheromone_sensitivity	4/164	0.00034842	0.000617376	0.0766827	0.135876	-0.584355	4.65269	RAD53;MCM3;SWI4;MCM2	Phenotype AutoRIF predicted Zscore
mitochondrial_tRNA_modification_(GO:0070900)	4/156	0.00028809	0.000635906	0.0234126	0.0513658	-1.03784	8.46075	RAD53;MCM3;MCM6;MCM2	GO Biological Process AutoRIF predicted Zscore
DNA_amplification_(GO:0006277)	3/63	0.000291536	0.000643216	0.0194779	0.0496622	-0.859018	6.9927	CDC45;MCM4;MCM2	GO Biological Process AutoRIF
sister chromatid biorientation (GO:0031134)	2/11	0.000222888	0.000671716	0.00536772	0.0171145	-1.83941	15.4673	CDC28;BUB1	GO Biological Process 2018
error-prone_translesion_synthesis_(GO:0042276)	3/64	0.000305439	0.000671966	0.0202688	0.0510032	-0.891858	7.21849	RAD53;DUN1;CDC28	GO Biological Process AutoRIF
regulation_of_nucleocytoplasmic_transport_(GO:0046822)	4/159	0.000309753	0.000681644	0.0248705	0.0541774	-0.956484	7.72814	RAD53;MCM7;MCM3;MCM2	GO Biological Process AutoRIF predicted Zscore
mitochondrial_genome_maintenance_(GO:0000002)	4/160	0.000317226	0.000695909	0.0537973	0.115066	-0.8515	6.85959	RAD53;MCM3;CDC28;MCM2	GO Biological Process AutoRIF
N-terminal_protein_amino_acid_modification_(GO:0031365)	4/162	0.000332561	0.000729618	0.0263828	0.057189	-0.96646	7.74008	RAD53;CDC45;MCM6;MCM2	GO Biological Process AutoRIF predicted Zscore
cellular_response_to_acid_chemical_(GO:0071229)	4/163	0.000340424	0.000744678	0.0568134	0.120846	-0.857857	6.85026	RAD53;DUN1;SWI4;CDC28	GO Biological Process AutoRIF
cell_wall_(1->3)-beta-D-glucan_biosynthetic_process_(GO:0034411)	5/298	0.00034293	0.00074592	0.122648	0.225921	-0.706526	5.63665	CDC20;HSL1;MOB1;SWI4;CDC28	GO Biological Process AutoRIF
cell_wall_(1->3)-beta-D-glucan_metabolic_process_(GO:0034407)	5/298	0.00034293	0.00074592	0.122648	0.225921	-0.703429	5.61195	CDC20;HSL1;MOB1;SWI4;CDC28	GO Biological Process AutoRIF
tRNA_transcription_from_RNA_polymerase_III_promoter_(GO:0042797)	4/165	0.00035655	0.000779886	0.02795	0.0604053	-0.688575	5.46662	HSL1;MRC1;GIN4;BUB1	GO Biological Process AutoRIF predicted Zscore
regulation of apoptotic process (GO:0042981)	2/12	0.000267118	0.000783545	0.00622816	0.0190305	-1.68273	13.8452	RAD53;DUN1	GO Biological Process 2018
negative regulation of DNA-dependent DNA replication (GO:2000104)	2/12	0.000267118	0.000783545	0.00622816	0.0190305	-1.62627	13.3806	DUN1;MRC1	GO Biological Process 2018
valine_metabolic_process_(GO:0006573)	4/166	0.000364815	0.000790154	0.0599204	0.125719	-0.9473	7.49894	YOX1;SWI4;CDC28;MCM1	GO Biological Process AutoRIF
positive_regulation_of_phosphatase_activity_(GO:0010922)	3/68	0.000365318	0.000790154	0.0236087	0.0578941	-0.755555	5.98002	CDC20;CDC28;PHO5	GO Biological Process AutoRIF
negative_regulation_of_protein_dephosphorylation_(GO:0035308)	3/70	0.000397892	0.000858199	0.0253847	0.0610819	-0.743384	5.8202	CDC20;RAD53;CDC28	GO Biological Process AutoRIF
colony_shape	2/16	0.000483151	0.000900791	0.0173794	0.0455174	-0.926776	7.0761	CLB2;CDC28	Phenotype AutoRIF
regulation_of_protein_localization_(GO:0032880)	4/172	0.000417314	0.000910047	0.0318223	0.0685694	-1.18766	9.24197	RAD53;SWI4;MCM5;IRR1	GO Biological Process AutoRIF predicted Zscore
septin cytoskeleton organization (GO:0032185)	2/13	0.000315275	0.000912637	0.00714713	0.0212482	-1.62492	13.1002	PCL2;PCL1	GO Biological Process 2018
peptide_metabolic_process_(GO:0006518)	3/73	0.000450165	0.000965535	0.028181	0.066359	-0.747625	5.76112	RAD53;DUN1;CDC28	GO Biological Process AutoRIF
peptide_catabolic_process_(GO:0043171)	3/73	0.000450165	0.000965535	0.028181	0.066359	-0.744068	5.73371	RAD53;DUN1;CDC28	GO Biological Process AutoRIF
dephosphorylation_of_RNA_polymerase_II_C-terminal_domain_(GO:0070940)	4/175	0.000445494	0.000965682	0.0335749	0.0717057	-0.844868	6.51928	RAD53;MCM7;CLB2;MCM2	GO Biological Process AutoRIF predicted Zscore
cytoplasmic_translation_(GO:0002181)	4/175	0.000445494	0.000965682	0.0335749	0.0717057	-0.785498	6.06116	RAD53;MCM7;CLB2;MCM3	GO Biological Process AutoRIF predicted Zscore
positive_regulation_of_transcription_initiation_from_RNA_polymerase_II_promoter_(GO:0060261)	4/176	0.000455183	0.00098081	0.0341716	0.0723399	-0.883034	6.79478	RAD53;CLB2;SWI4;MCM2	GO Biological Process AutoRIF predicted Zscore
peptide_biosynthetic_process_(GO:0043043)	4/176	0.000455183	0.00098081	0.0341716	0.0723399	-0.781158	6.01086	RAD53;SWI4;MCM6;MCM2	GO Biological Process AutoRIF predicted Zscore
shmoo_formation	4/188	0.000583491	0.00101608	0.112071	0.188652	-0.360345	2.68331	RAD53;DBF2;MCM3;PCL2	Phenotype AutoRIF predicted Zscore
regulation_of_cell_wall_organization_or_biogenesis_(GO:1903338)	4/178	0.000475009	0.00102049	0.0353838	0.0746877	-0.877208	6.71255	RAD53;CDC45;MCM6;MCM2	GO Biological Process AutoRIF predicted Zscore
lagging_strand_elongation_(GO:0006273)	2/16	0.000483151	0.00103341	0.0104764	0.0288101	-1.17593	8.97847	CDC45;MCM2	GO Biological Process AutoRIF
regulation_of_hydrolase_activity_(GO:0051336)	4/179	0.00048515	0.0010392	0.0359993	0.0755464	-0.737257	5.62605	RAD53;SWI4;IRR1;MCM2	GO Biological Process AutoRIF predicted Zscore
removal_of_nonhomologous_ends_(GO:0000735)	3/75	0.000487349	0.00104083	0.0161193	0.0356891	-0.971355	7.40807	HSL1;MRC1;BUB1	GO Biological Process AutoRIF predicted Zscore
spindle assembly (GO:0051225)	2/14	0.000367343	0.00104955	0.00812361	0.0238293	-1.58356	12.5247	CDC28;CDC5	GO Biological Process 2018
negative_regulation_of_DNA_recombination_(GO:0045910)	4/180	0.000495444	0.00105501	0.0366211	0.0766291	-0.569549	4.3343	RAD53;SWI4;IRR1;MCM2	GO Biological Process AutoRIF predicted Zscore
nuclear_morphology	3/80	0.000588779	0.00107943	0.0678991	0.138636	-0.565486	4.20578	SIC1;CLB2;CDC28	Phenotype AutoRIF
negative_regulation_of_ATPase_activity_(GO:0032780)	3/76	0.000506657	0.00108068	0.0311359	0.072431	-0.928487	7.04506	MRC1;CDC28;CDC5	GO Biological Process AutoRIF
mRNA_modification_(GO:0016556)	4/183	0.000527263	0.00111947	0.0385242	0.080379	-0.781669	5.89989	RAD53;CDC45;MCM6;MCM2	GO Biological Process AutoRIF predicted Zscore
regulation_of_transcription-coupled_nucleotide-excision_repair_(GO:0090262)	4/185	0.000549268	0.00115939	0.0398244	0.0823796	-0.636453	4.7778	HSL1;MCM6;BUB1;MCM2	GO Biological Process AutoRIF predicted Zscore
protein_localization_to_nucleolar_rDNA_repeats_(GO:0034503)	4/185	0.000549268	0.00115939	0.0398244	0.0823796	-0.584343	4.38662	HSL1;MRC1;GIN4;MCM6	GO Biological Process AutoRIF predicted Zscore
DNA_strand_elongation_involved_in_DNA_replication_(GO:0006271)	2/17	0.000546861	0.00116001	0.0116444	0.0311327	-1.09865	8.25228	CDC45;MCM2	GO Biological Process AutoRIF
regulation_of_phosphorylation_of_RNA_polymerase_II_C-terminal_domain_(GO:1901407)	3/78	0.00054673	0.00116001	0.0331936	0.0765242	-0.753165	5.65744	CLB2;SWI4;CDC28	GO Biological Process AutoRIF
negative_regulation_of_cellular_process_(GO:0048523)	4/185	0.000549268	0.00116191	0.0816759	0.164205	-0.753277	5.65479	CLB5;SWI4;CDC28;CDC5	GO Biological Process AutoRIF
RNA_stabilization_(GO:0043489)	4/186	0.000560513	0.00117968	0.040484	0.0835054	-1.21347	9.08481	RAD53;CLB2;MCM6;MCM2	GO Biological Process AutoRIF predicted Zscore
sporulation_efficiency	4/194	0.000656448	0.00118376	0.188033	0.313388	-0.112547	0.824818	SPO12;CLB2;CDC28;SWI4	Phenotype AutoRIF
positive regulation of G1/S transition of mitotic cell cycle (GO:1900087)	2/15	0.000423307	0.00119394	0.00915659	0.0261617	-1.80873	14.0492	CLN2;CDC45	GO Biological Process 2018
regulation_of_phosphorylation_of_RNA_polymerase_II_C-terminal_domain_(GO:1901407)	4/188	0.000583491	0.00122095	0.0418221	0.0855344	-0.885737	6.59562	RAD53;MCM3;MCM6;MCM2	GO Biological Process AutoRIF predicted Zscore
positive_regulation_of_catabolic_process_(GO:0009896)	4/188	0.000583491	0.00122095	0.0418221	0.0855344	-0.712558	5.30605	RAD53;MCM3;SWI4;MCM6	GO Biological Process AutoRIF predicted Zscore
cell_fusion	4/200	0.000735662	0.00123836	0.132171	0.21531	-0.593039	4.27862	PDS1;SWI4;IRR1;SMC3	Phenotype AutoRIF predicted Zscore
vegetative_growth	4/200	0.000735662	0.00123836	0.132171	0.21531	-0.440149	3.17556	CDC20;PDS1;SWI4;IRR1	Phenotype AutoRIF predicted Zscore
mRNA_processing_(GO:0006397)	4/190	0.000607133	0.00126312	0.0431855	0.0878266	-0.628725	4.65681	RAD53;CDC45;MCM6;MCM2	GO Biological Process AutoRIF predicted Zscore
regulation_of_ubiquitin_protein_ligase_activity_(GO:1904666)	4/190	0.000607133	0.00126312	0.0431855	0.0878266	-0.585573	4.3372	RAD53;PDS1;SWI4;IRR1	GO Biological Process AutoRIF predicted Zscore
regulation_of_transcription_from_RNA_polymerase_II_promoter_(GO:0006357)	4/191	0.000619206	0.00128454	0.0438766	0.0889823	-0.599765	4.43051	RAD53;SWI4;MCM6;MCM2	GO Biological Process AutoRIF predicted Zscore
IMP_biosynthetic_process_(GO:0006188)	4/192	0.000631448	0.0013062	0.0445741	0.0898933	-0.55772	4.109	CDC20;CLB6;CLB1;PDS1	GO Biological Process AutoRIF predicted Zscore
regulation of meiotic nuclear division (GO:0040020)	2/16	0.000483151	0.00131226	0.0102451	0.0281739	-2.33131	17.8	CDC20;CLB1	GO Biological Process 2018
synaptonemal complex assembly (GO:0007130)	2/16	0.000483151	0.00131226	0.0102451	0.0281739	-2.0105	15.3505	CDC28;SMC3	GO Biological Process 2018
replication-born double-strand break repair via sister chromatid exchange (GO:1990414)	2/16	0.000483151	0.00131226	0.0102451	0.0281739	-1.7398	13.2837	MCD1;SMC3	GO Biological Process 2018
autophagy_of_nucleus_(GO:0044804)	3/82	0.000632843	0.00132776	0.0375185	0.0834949	-0.842175	6.20286	RAD53;PDS1;CDC28	GO Biological Process AutoRIF
negative_regulation_of_cellular_carbohydrate_metabolic_process_(GO:0010677)	3/82	0.000632843	0.00132776	0.0375185	0.0834949	-0.681323	5.01814	SIC1;SWI5;CDC28	GO Biological Process AutoRIF
invasive_filamentous_growth_(GO:0036267)	4/192	0.000631448	0.00132776	0.0905725	0.17791	-0.594279	4.37835	HSL1;CLB2;CDC28;MCM1	GO Biological Process AutoRIF
shmoo_formation	3/87	0.000752075	0.00133433	0.082245	0.161553	-0.629527	4.52798	CDC28;FAR1;MCM2	Phenotype AutoRIF
Rab_protein_signal_transduction_(GO:0032482)	3/83	0.000655643	0.00137186	0.0386431	0.0857498	-0.614937	4.50742	SPO12;DBF2;CDC5	GO Biological Process AutoRIF
activation_of_protein_kinase_activity_(GO:0032147)	4/196	0.000682143	0.00140704	0.0474274	0.0937699	-0.828924	6.04308	RAD53;MCM3;SWI4;IRR1	GO Biological Process AutoRIF predicted Zscore
peptide_transport_(GO:0015833)	5/346	0.000676514	0.0014117	0.190074	0.321663	-0.714627	5.21575	CDC45;CDC28;FAR1;CDC5;MCM2	GO Biological Process AutoRIF
cellular_bud_site_selection_(GO:0000282)	4/200	0.000735662	0.00141278	0.0503819	0.0937699	-0.998555	7.20432	RAD53;MCM3;SWI4;MCM2	GO Biological Process AutoRIF predicted Zscore
cellular_protein_modification_process_(GO:0006464)	4/200	0.000735662	0.00141278	0.0503819	0.0937699	-0.935397	6.74864	RAD53;SWI4;IRR1;MCM2	GO Biological Process AutoRIF predicted Zscore
negative_regulation_of_meiotic_nuclear_division_(GO:0045835)	4/200	0.000735662	0.00141278	0.0503819	0.0937699	-0.926277	6.68285	PDS1;SWI4;IRR1;SMC3	GO Biological Process AutoRIF predicted Zscore
nucleoside_triphosphate_metabolic_process_(GO:0009141)	4/200	0.000735662	0.00141278	0.0503819	0.0937699	-0.88553	6.38887	RAD53;MCM7;CLB2;MCM3	GO Biological Process AutoRIF predicted Zscore
regulation_of_organelle_assembly_(GO:1902115)	3/86	0.000727173	0.00141278	0.022853	0.0502905	-0.874011	6.3159	RAD53;MCM7;MCM3	GO Biological Process AutoRIF predicted Zscore
translation_reinitiation_(GO:0002188)	4/200	0.000735662	0.00141278	0.0503819	0.0937699	-0.859279	6.19947	RAD53;MCM7;CLB2;MCM6	GO Biological Process AutoRIF predicted Zscore
positive_regulation_of_actin_nucleation_(GO:0051127)	4/200	0.000735662	0.00141278	0.0503819	0.0937699	-0.810691	5.84892	CDC20;PDS1;SWI4;CDC5	GO Biological Process AutoRIF predicted Zscore
heterochromatin_organization_involved_in_chromatin_silencing_(GO:0070868)	4/200	0.000735662	0.00141278	0.0503819	0.0937699	-0.787419	5.68103	HSL1;MRC1;GIN4;BUB1	GO Biological Process AutoRIF predicted Zscore
regulation_of_cellular_protein_localization_(GO:1903827)	4/200	0.000735662	0.00141278	0.0503819	0.0937699	-0.768781	5.54656	RAD53;PDS1;SWI4;IRR1	GO Biological Process AutoRIF predicted Zscore
positive_regulation_of_protein_modification_by_small_protein_conjugation_or_removal_(GO:1903322)	4/200	0.000735662	0.00141278	0.0503819	0.0937699	-0.759359	5.47857	PDS1;SWI4;IRR1;SMC3	GO Biological Process AutoRIF predicted Zscore
RNA_metabolic_process_(GO:0016070)	4/200	0.000735662	0.00141278	0.0503819	0.0937699	-0.757149	5.46264	RAD53;CLB2;MCM6;MCM2	GO Biological Process AutoRIF predicted Zscore
positive_regulation_of_phospholipid_biosynthetic_process_(GO:0071073)	4/200	0.000735662	0.00141278	0.0503819	0.0937699	-0.751572	5.4224	CDC20;PDS1;SWI4;MCM2	GO Biological Process AutoRIF predicted Zscore
rRNA_transcription_(GO:0009303)	4/200	0.000735662	0.00141278	0.0503819	0.0937699	-0.744907	5.37431	RAD53;CLB2;MCM6;MCM2	GO Biological Process AutoRIF predicted Zscore
positive_regulation_of_histone_modification_(GO:0031058)	4/200	0.000735662	0.00141278	0.0503819	0.0937699	-0.739566	5.33577	RAD53;CDC45;MCD1;MCM6	GO Biological Process AutoRIF predicted Zscore
nuclear_pore_localization_(GO:0051664)	4/200	0.000735662	0.00141278	0.0503819	0.0937699	-0.726775	5.2435	RAD53;CLB2;MCM6;MCM2	GO Biological Process AutoRIF predicted Zscore
nuclear_pore_distribution_(GO:0031081)	4/200	0.000735662	0.00141278	0.0503819	0.0937699	-0.725931	5.2374	RAD53;MCM7;CLB2;MCM4	GO Biological Process AutoRIF predicted Zscore
pore_complex_assembly_(GO:0046931)	4/200	0.000735662	0.00141278	0.0503819	0.0937699	-0.703605	5.07633	RAD53;MCM7;CLB2;MCM4	GO Biological Process AutoRIF predicted Zscore
Golgi_organization_(GO:0007030)	4/200	0.000735662	0.00141278	0.0503819	0.0937699	-0.689816	4.97685	RAD53;SWI4;MCM4;MCM2	GO Biological Process AutoRIF predicted Zscore
mRNA_cleavage_(GO:0006379)	4/200	0.000735662	0.00141278	0.0503819	0.0937699	-0.681429	4.91633	RAD53;CLB2;MCM6;MCM2	GO Biological Process AutoRIF predicted Zscore
regulation_of_macromolecule_metabolic_process_(GO:0060255)	4/200	0.000735662	0.00141278	0.0503819	0.0937699	-0.672521	4.85207	CDC20;CLB6;CLB1;PDS1	GO Biological Process AutoRIF predicted Zscore
stress_granule_assembly_(GO:0034063)	4/200	0.000735662	0.00141278	0.0503819	0.0937699	-0.66371	4.7885	RAD53;MCM7;CLB2;SWI5	GO Biological Process AutoRIF predicted Zscore
positive_regulation_of_cellular_protein_localization_(GO:1903829)	4/199	0.000722012	0.00141278	0.0496338	0.0937699	-0.652337	4.71866	RAD53;PDS1;SWI4;IRR1	GO Biological Process AutoRIF predicted Zscore
intron_homing_(GO:0006314)	4/200	0.000735662	0.00141278	0.0503819	0.0937699	-0.645913	4.6601	RAD53;MCM3;MCM6;MCM2	GO Biological Process AutoRIF predicted Zscore
nuclear_envelope_organization_(GO:0006998)	4/200	0.000735662	0.00141278	0.0503819	0.0937699	-0.612141	4.41644	RAD53;SWI4;MCM6;MCM2	GO Biological Process AutoRIF predicted Zscore
translational_termination_(GO:0006415)	4/197	0.000695254	0.00141278	0.0481566	0.0937699	-0.55284	4.01983	RAD53;MCM7;CLB2;MCM3	GO Biological Process AutoRIF predicted Zscore
establishment_of_protein_localization_to_membrane_(GO:0090150)	4/200	0.000735662	0.00141278	0.0503819	0.0937699	-0.517251	3.73183	RAD53;SWI4;MCM6;MCM2	GO Biological Process AutoRIF predicted Zscore
meiosis I (GO:0007127)	2/17	0.000546861	0.00146719	0.011388	0.0309304	-1.46022	10.9682	SPO12;PDS1	GO Biological Process 2018
biotin_biosynthetic_process_(GO:0009102)	3/89	0.000803496	0.00153491	0.0249186	0.0541774	-0.737861	5.25839	MCM7;MCM3;MCM1	GO Biological Process AutoRIF predicted Zscore
biotin_metabolic_process_(GO:0006768)	3/89	0.000803496	0.00153491	0.0249186	0.0541774	-0.733005	5.22379	MCM7;MCM3;MCM1	GO Biological Process AutoRIF predicted Zscore
protein_oligomerization_(GO:0051259)	4/201	0.000749493	0.00155976	0.102679	0.197658	-0.660647	4.75409	RAD53;MRC1;CDC28;MCM2	GO Biological Process AutoRIF
double-strand break repair (GO:0006302)	3/81	0.000610556	0.00161834	0.0353562	0.0836384	-1.23217	9.11946	MCD1;CDC28;SMC1	GO Biological Process 2018
ATP_biosynthetic_process_(GO:0006754)	4/206	0.000821426	0.00170485	0.10972	0.208089	-0.697504	4.95539	MCM4;MCM5;MCM6;MCM2	GO Biological Process AutoRIF
positive_regulation_of_MAP_kinase_activity_(GO:0043406)	2/21	0.000840044	0.0017388	0.0168525	0.0438392	-1.06633	7.55178	CDC28;FAR1	GO Biological Process AutoRIF
DNA damage checkpoint (GO:0000077)	2/19	0.000685814	0.00179618	0.0138336	0.0371145	-1.42082	10.3506	RAD53;DUN1	GO Biological Process 2018
septin ring assembly (GO:0000921)	2/20	0.000761027	0.00196972	0.0151342	0.0401149	-1.45416	10.4421	GIN4;KCC4	GO Biological Process 2018
mRNA_stabilization_(GO:0048255)	4/215	0.000963	0.00198796	0.122936	0.225921	-0.443559	3.08072	CLN2;SIC1;CDC28;FAR1	GO Biological Process AutoRIF
positive_regulation_of_transcription_by_pheromones_(GO:0009371)	2/23	0.00100943	0.00207824	0.0197644	0.0502263	-0.939824	6.48325	CDC28;MCM1	GO Biological Process AutoRIF
mRNA_destabilization_(GO:0061157)	3/100	0.00112635	0.002146	0.0333337	0.0716131	-1.00206	6.80278	RAD53;CLB2;MCM5	GO Biological Process AutoRIF predicted Zscore
heterochromatin_assembly_(GO:0031507)	3/98	0.00106247	0.00218159	0.0575474	0.12207	-0.726333	4.97332	CLB2;MCD1;BUB1	GO Biological Process AutoRIF
regulation_of_cytoplasmic_translation_(GO:2000765)	3/101	0.00115919	0.00220276	0.034164	0.0723399	-0.935385	6.32323	RAD53;MCM7;MCM3	GO Biological Process AutoRIF predicted Zscore
mRNA_destabilization_(GO:0061157)	3/99	0.00109411	0.00224061	0.05894	0.124	-0.726763	4.95493	CDC20;PDS1;CDC28	GO Biological Process AutoRIF
nutrient_uptake	4/233	0.00129635	0.00226346	0.285284	0.441989	-0.337997	2.24707	CLB2;CDC28;PHO5;MCM1	Phenotype AutoRIF
mating_efficiency	3/107	0.00136893	0.00226659	0.0890419	0.155056	-0.483577	3.18858	RAD53;SWI4;MCM2	Phenotype AutoRIF predicted Zscore
signal_peptide_processing_(GO:0006465)	4/224	0.00112097	0.00228952	0.13682	0.247304	-0.571603	3.88322	CLN2;SIC1;FAR1;PHO5	GO Biological Process AutoRIF
aneuploidy	3/106	0.00133244	0.00229013	0.127011	0.229037	-0.340293	2.25299	CDC20;SMC3;BUB1	Phenotype AutoRIF
regulation_of_cellular_component_organization_(GO:0051128)	3/100	0.00112635	0.00229442	0.0603487	0.126273	-0.735893	4.99581	MOB1;CDC28;MCM1	GO Biological Process AutoRIF
positive_regulation_of_cell_proliferation_(GO:0008284)	3/103	0.00122666	0.00232488	0.035857	0.0754664	-0.829741	5.56214	RAD53;MCM6;MCM2	GO Biological Process AutoRIF predicted Zscore
exit_from_G0_(stationary_phase)	3/109	0.00144379	0.00235199	0.092841	0.158931	-0.428085	2.79988	RAD53;MCM7;MCM3	Phenotype AutoRIF predicted Zscore
DNA-dependent DNA replication maintenance of fidelity (GO:0045005)	2/22	0.00092285	0.00236078	0.0178866	0.0462948	-1.58337	11.0647	DUN1;MRC1	GO Biological Process 2018
chromatin_disassembly_(GO:0031498)	3/102	0.00119262	0.00242301	0.063214	0.131553	-0.641959	4.32141	RAD53;CDC28;MCM2	GO Biological Process AutoRIF
cellular macromolecule catabolic process (GO:0044265)	2/23	0.00100943	0.00252357	0.0193365	0.048897	-1.5312	10.5628	HSL1;CDC28	GO Biological Process 2018
synapsis (GO:0007129)	2/23	0.00100943	0.00252357	0.0193365	0.048897	-1.47503	10.1753	CDC28;SMC3	GO Biological Process 2018
regulation_of_protein_catabolic_process_(GO:0042176)	3/107	0.00136893	0.00258774	0.0393721	0.081912	-0.877167	5.7838	RAD53;MCM7;MCM3	GO Biological Process AutoRIF predicted Zscore
positive_regulation_of_autophagy_(GO:0010508)	2/26	0.00129166	0.00260623	0.0244958	0.0591278	-0.974703	6.48356	SIC1;PCL1	GO Biological Process AutoRIF
positive_regulation_of_macroautophagy_(GO:0016239)	2/26	0.00129166	0.00260623	0.0244958	0.0591278	-0.958817	6.37788	SIC1;PCL1	GO Biological Process AutoRIF
Ras_protein_signal_transduction_(GO:0007265)	4/233	0.00129635	0.00260623	0.15133	0.267257	-0.573854	3.8151	CDC20;RAD53;CDC28;CDC5	GO Biological Process AutoRIF
cellular_response_to_nutrient_levels_(GO:0031669)	4/233	0.00129635	0.00260623	0.15133	0.267257	-0.568707	3.78088	DBF2;CLB2;SWI4;CDC28	GO Biological Process AutoRIF
regulation of DNA-dependent DNA replication (GO:0090329)	2/24	0.00109977	0.00268832	0.0208343	0.0515006	-1.39484	9.50255	MRC1;MCM5	GO Biological Process 2018
protein autophosphorylation (GO:0046777)	2/24	0.00109977	0.00268832	0.0208343	0.0515006	-1.25519	8.55116	HSL1;GIN4	GO Biological Process 2018
regulation_of_protein_metabolic_process_(GO:0051246)	3/109	0.00144379	0.00272215	0.0411938	0.0847282	-0.847105	5.54048	RAD53;MCM7;MCM3	GO Biological Process AutoRIF predicted Zscore
regulation_of_ATPase_activity_(GO:0043462)	3/107	0.00136893	0.00274499	0.0706514	0.145071	-0.764433	5.04046	RAD53;CDC28;MCM2	GO Biological Process AutoRIF
cellular_response_to_glucose_stimulus_(GO:0071333)	2/27	0.00139319	0.00277915	0.0261663	0.0623777	-0.946472	6.22415	CDC28;MCM1	GO Biological Process AutoRIF
actomyosin_contractile_ring_assembly_(GO:0000915)	2/27	0.00139319	0.00277915	0.0261663	0.0623777	-0.936257	6.15698	DBF2;CDC28	GO Biological Process AutoRIF
positive regulation of cellular biosynthetic process (GO:0031328)	2/25	0.00119385	0.00288623	0.0223791	0.0547045	-1.55311	10.4533	CLB6;CLB5	GO Biological Process 2018
regulation_of_translation_(GO:0006417)	3/112	0.00156084	0.00293519	0.044006	0.0889954	-0.757475	4.8952	RAD53;MCM7;MCM3	GO Biological Process AutoRIF predicted Zscore
cellular_response_to_pH_(GO:0071467)	3/110	0.00148217	0.00294902	0.0752979	0.153976	-0.606542	3.95116	RAD53;DUN1;CLB1	GO Biological Process AutoRIF
histone_lysine_methylation_(GO:0034968)	4/243	0.00151283	0.00300226	0.168135	0.29093	-0.656381	4.26239	CDC20;MAD2;RAD53;CDC28	GO Biological Process AutoRIF
mutation_frequency	3/118	0.00181242	0.00306717	0.158997	0.273277	-0.438478	2.76815	CDC45;CDC5;MCM2	Phenotype AutoRIF
ncRNA_catabolic_process_(GO:0034661)	3/115	0.00168368	0.00314983	0.0469131	0.0937699	-0.716496	4.5761	SWI4;MCM6;MCM2	GO Biological Process AutoRIF predicted Zscore
ncRNA_metabolic_process_(GO:0034660)	3/115	0.00168368	0.00314983	0.0469131	0.0937699	-0.713948	4.55982	SWI4;MCM6;MCM2	GO Biological Process AutoRIF predicted Zscore
regulation_of_histone_deacetylation_(GO:0031063)	3/113	0.00160114	0.00316935	0.0800788	0.161839	-0.699538	4.50295	RAD53;CDC28;SMC3	GO Biological Process AutoRIF
regulation_of_SNARE_complex_assembly_(GO:0035542)	3/116	0.00172593	0.00322055	0.047903	0.0937699	-0.67679	4.30573	CDC20;CLB5;PDS1	GO Biological Process AutoRIF predicted Zscore
regulation of macroautophagy (GO:0016241)	2/27	0.00139319	0.00333153	0.0256063	0.0619053	-1.35137	8.8868	SIC1;PCL1	GO Biological Process 2018
positive_regulation_of_translation_(GO:0045727)	3/118	0.00181242	0.00337324	0.049914	0.0937699	-0.602119	3.80123	RAD53;MCM7;MCM3	GO Biological Process AutoRIF predicted Zscore
RNA_catabolic_process_(GO:0006401)	3/116	0.00172593	0.00340761	0.0849911	0.169982	-0.716489	4.5583	RAD53;BUB1;MCM2	GO Biological Process AutoRIF
mRNA_catabolic_process_(GO:0006402)	3/117	0.00176884	0.0034834	0.0866572	0.172419	-0.733934	4.65126	RAD53;BUB1;MCM2	GO Biological Process AutoRIF
regulation of chromatin silencing at telomere (GO:0031938)	2/28	0.00149841	0.00354462	0.0272869	0.0652512	-1.31976	8.58283	CDC45;MCM5	GO Biological Process 2018
pheromone_production	3/127	0.00223501	0.00372502	0.184493	0.312219	-0.305444	1.86428	CDC28;FAR1;PHO5	Phenotype AutoRIF
N-terminal_protein_amino_acid_acetylation_(GO:0006474)	3/121	0.00194715	0.00382476	0.0934615	0.181731	-0.528802	3.30046	CDC45;SMC3;MCM2	GO Biological Process AutoRIF
nucleoside_phosphate_biosynthetic_process_(GO:1901293)	3/122	0.00199341	0.00389576	0.095197	0.184175	-0.580338	3.60848	SWI4;MCM5;PHO5	GO Biological Process AutoRIF
nucleoside_phosphate_metabolic_process_(GO:0006753)	3/122	0.00199341	0.00389576	0.095197	0.184175	-0.577744	3.59236	SWI4;MCM5;PHO5	GO Biological Process AutoRIF
regulation_of_protein_localization_to_nucleus_(GO:1900180)	3/125	0.0021363	0.00396585	0.0572761	0.106328	-0.71018	4.36667	RAD53;MCM7;MCM3	GO Biological Process AutoRIF predicted Zscore
actin_filament_capping_(GO:0051693)	2/34	0.0022066	0.00430147	0.0390754	0.0864599	-0.880228	5.38374	CLB2;CDC28	GO Biological Process AutoRIF
negative_regulation_of_chromatin_silencing_at_telomere_(GO:0031939)	3/130	0.00238833	0.00442238	0.0628368	0.116353	-0.776369	4.68706	HSL1;MRC1;GIN4	GO Biological Process AutoRIF predicted Zscore
small_GTPase_mediated_signal_transduction_(GO:0007264)	3/133	0.00254802	0.00470605	0.0662915	0.122436	-0.475716	2.84118	RAD53;MCM3;MCM2	GO Biological Process AutoRIF predicted Zscore
tRNA_transport_(GO:0051031)	4/279	0.00250126	0.00486357	0.233621	0.379534	-0.379405	2.273	RAD53;CLN2;DBF2;SWI5	GO Biological Process AutoRIF
cellular protein catabolic process (GO:0044257)	2/33	0.00207949	0.0048669	0.0363264	0.0850193	-1.36365	8.42137	HSL1;CDC28	GO Biological Process 2018
mitochondrial_mRNA_processing_(GO:0090615)	3/135	0.00265808	0.00489681	0.0686431	0.126457	-0.552102	3.27405	RAD53;SWI4;MCM6	GO Biological Process AutoRIF predicted Zscore
carbohydrate_transport_(GO:0008643)	4/281	0.00256659	0.00497802	0.237448	0.3825	-0.405189	2.41703	DUN1;CDC28;PCL2;PCL1	GO Biological Process AutoRIF
maintenance_of_DNA_repeat_elements_(GO:0043570)	3/136	0.00271419	0.0049875	0.0698333	0.128323	-0.694891	4.1063	RAD53;MCM7;MCM3	GO Biological Process AutoRIF predicted Zscore
negative_regulation_of_MAPK_cascade_(GO:0043409)	2/37	0.00260944	0.00504841	0.0452132	0.0980681	-0.771088	4.58691	CDC28;FAR1	GO Biological Process AutoRIF
protein catabolic process (GO:0030163)	2/34	0.0022066	0.00511002	0.0382559	0.0885927	-1.61089	9.85268	HSL1;CDC28	GO Biological Process 2018
phosphatidylinositol_phosphorylation_(GO:0046854)	3/135	0.00265808	0.00512962	0.118941	0.223924	-0.615982	3.65287	MAD2;RAD53;CDC28	GO Biological Process AutoRIF
acid_pH_resistance	3/144	0.00318958	0.00523663	0.23533	0.386363	-0.103709	0.596106	RAD53;DUN1;PDS1	Phenotype AutoRIF
ATP-dependent_chromatin_remodeling_(GO:0043044)	3/137	0.00277103	0.00533423	0.122779	0.225921	-0.624912	3.67981	RAD53;CLB5;CDC28	GO Biological Process AutoRIF
mitotic spindle organization (GO:0007052)	2/35	0.0023373	0.00535632	0.0402241	0.0921802	-1.18633	7.18769	CLB1;CDC28	GO Biological Process 2018
cellular_response_to_cold_(GO:0070417)	3/140	0.00294596	0.00539968	0.0746888	0.136898	-0.797647	4.64815	RAD53;MCM7;MCM3	GO Biological Process AutoRIF predicted Zscore
cellular_hyperosmotic_response_(GO:0071474)	3/138	0.0028286	0.00543148	0.124715	0.227561	-0.69858	4.09925	HSL1;SIC1;MCM1	GO Biological Process AutoRIF
rRNA_catabolic_process_(GO:0016075)	4/290	0.00287517	0.00549349	0.254865	0.40463	-0.580889	3.39916	CDC20;MCM6;SMC3;MCM2	GO Biological Process AutoRIF
rRNA_metabolic_process_(GO:0016072)	4/290	0.00287517	0.00549349	0.254865	0.40463	-0.577601	3.37992	CDC20;MCM6;SMC3;MCM2	GO Biological Process AutoRIF
negative regulation of transcription, DNA-templated (GO:0045892)	3/132	0.00249408	0.00565667	0.110366	0.162956	-1.15175	6.90341	YOX1;CDC28;MCM1	GO Biological Process 2018
cellular_response_to_decreased_oxygen_levels_(GO:0036294)	2/40	0.00304425	0.00580216	0.0516829	0.111473	-0.787941	4.56573	MCM3;MCM2	GO Biological Process AutoRIF
protein_localization_to_membrane_(GO:0072657)	3/142	0.00306628	0.00581535	0.132573	0.240758	-0.530149	3.06813	HSL1;CLB2;CDC28	GO Biological Process AutoRIF
protein_localization_to_plasma_membrane_(GO:0072659)	3/142	0.00306628	0.00581535	0.132573	0.240758	-0.494465	2.86161	HSL1;CLB2;CDC28	GO Biological Process AutoRIF
mRNA_transport_(GO:0051028)	3/144	0.00318958	0.00581677	0.0796933	0.145335	-0.807727	4.6427	RAD53;MCM7;MCM3	GO Biological Process AutoRIF predicted Zscore
positive_regulation_of_phosphorylation_of_RNA_polymerase_II_C-terminal_domain_(GO:1901409)	3/144	0.00318958	0.00581677	0.0796933	0.145335	-0.658056	3.78242	RAD53;CLB2;PCL1	GO Biological Process AutoRIF predicted Zscore
cellular_response_to_pH_(GO:0071467)	3/145	0.00325236	0.00591636	0.0809674	0.147287	-0.785284	4.4984	RAD53;MCM7;MCM3	GO Biological Process AutoRIF predicted Zscore
global_genome_nucleotide-excision_repair_(GO:0070911)	3/143	0.00312755	0.00591699	0.134565	0.2438	-0.496329	2.86258	RAD53;DUN1;SWI4	GO Biological Process AutoRIF
regulation_of_protein_export_from_nucleus_(GO:0046825)	3/148	0.00344526	0.00625155	0.0848434	0.153952	-0.777785	4.41063	RAD53;MCM7;MCM3	GO Biological Process AutoRIF predicted Zscore
ribosomal_large_subunit_assembly_(GO:0000027)	3/146	0.0033159	0.00625795	0.140605	0.252957	-0.46337	2.64539	SIC1;CLB2;PDS1	GO Biological Process AutoRIF
negative_regulation_of_translation_(GO:0017148)	4/302	0.00332501	0.00625981	0.278519	0.432656	-0.367359	2.09625	CLN2;CLB2;MRC1;CDC28	GO Biological Process AutoRIF
establishment_of_protein_localization_to_organelle_(GO:0072594)	2/42	0.00335169	0.00629464	0.0561703	0.119809	-0.673004	3.83497	CDC28;FAR1	GO Biological Process AutoRIF
polyphosphate_metabolic_process_(GO:0006797)	3/149	0.00351108	0.00635506	0.0861533	0.155937	-0.721152	4.07583	RAD53;MCM7;MCM3	GO Biological Process AutoRIF predicted Zscore
regulation_of_telomerase_activity_(GO:0051972)	2/43	0.00351064	0.00653028	0.058464	0.123335	-0.69933	3.95258	RAD53;CLB2	GO Biological Process AutoRIF
positive_regulation_of_endocytosis_(GO:0045807)	2/43	0.00351064	0.00653028	0.058464	0.123335	-0.688469	3.8912	SIC1;PCL1	GO Biological Process AutoRIF
arginine_biosynthetic_process_(GO:0006526)	3/149	0.00351108	0.00653028	0.146738	0.262153	-0.563207	3.18315	HSL1;RAD53;CDC28	GO Biological Process AutoRIF
arginine_metabolic_process_(GO:0006525)	3/149	0.00351108	0.00653028	0.146738	0.262153	-0.562248	3.17773	HSL1;RAD53;CDC28	GO Biological Process AutoRIF
positive_regulation_of_protein_modification_process_(GO:0031401)	3/151	0.00364504	0.0065647	0.0887994	0.159927	-0.758099	4.25626	RAD53;MCM3;MCM4	GO Biological Process AutoRIF predicted Zscore
C-terminal_protein_amino_acid_modification_(GO:0018410)	3/151	0.00364504	0.0065647	0.0887994	0.159927	-0.721692	4.05186	RAD53;CDC45;MCM2	GO Biological Process AutoRIF predicted Zscore
phosphorylation_of_RNA_polymerase_II_C-terminal_domain_(GO:0070816)	3/152	0.00371318	0.00667082	0.0901355	0.16153	-0.755351	4.22684	RAD53;MCM6;MCM2	GO Biological Process AutoRIF predicted Zscore
hexose_mediated_signaling_(GO:0009757)	3/151	0.00364504	0.00674683	0.150876	0.267257	-0.680948	3.82311	RAD53;SIC1;CDC28	GO Biological Process AutoRIF
polyphosphate_metabolic_process_(GO:0006797)	3/151	0.00364504	0.00674683	0.150876	0.267257	-0.477335	2.67994	CLB2;PHO5;MCM1	GO Biological Process AutoRIF
regulation_of_phosphate_metabolic_process_(GO:0019220)	3/152	0.00371318	0.00685646	0.15296	0.269518	-0.455554	2.54922	RAD53;CDC28;PHO5	GO Biological Process AutoRIF
transcriptional_open_complex_formation_at_RNA_polymerase_II_promoter_(GO:0001113)	3/154	0.00385178	0.0069027	0.0928336	0.165954	-0.840655	4.67338	RAD53;MCM6;MCM2	GO Biological Process AutoRIF predicted Zscore
protein_localization_to_cell_periphery_(GO:1990778)	3/154	0.00385178	0.00709538	0.157156	0.274399	-0.646849	3.59598	MCM3;CDC28;CDC5	GO Biological Process AutoRIF
invasive_growth	3/162	0.00443768	0.00711438	0.21412	0.343272	-0.620718	3.36282	RAD53;MCM3;SWI4	Phenotype AutoRIF predicted Zscore
mitochondrial_translational_initiation_(GO:0070124)	3/156	0.00399351	0.00713902	0.0955658	0.170418	-0.783715	4.32852	RAD53;MCM6;MCM2	GO Biological Process AutoRIF predicted Zscore
negative_regulation_of_DNA_biosynthetic_process_(GO:2000279)	3/157	0.00406556	0.0072321	0.0969445	0.172029	-0.569206	3.13359	RAD53;SWI4;IRR1	GO Biological Process AutoRIF predicted Zscore
negative_regulation_of_DNA_metabolic_process_(GO:0051053)	3/157	0.00406556	0.0072321	0.0969445	0.172029	-0.546347	3.00775	RAD53;SWI4;IRR1	GO Biological Process AutoRIF predicted Zscore
organelle_inheritance_(GO:0048308)	3/158	0.00413839	0.00734362	0.0983316	0.174064	-0.744053	4.08295	RAD53;SWI4;IRR1	GO Biological Process AutoRIF predicted Zscore
nucleosome_positioning_(GO:0016584)	3/158	0.00413839	0.00758705	0.165658	0.28729	-0.476011	2.61209	PHO5;MCM1;MCM2	GO Biological Process AutoRIF
ATP_transport_(GO:0015867)	4/321	0.00413209	0.00758705	0.316725	0.472632	-0.410167	2.2514	CDC20;HSL1;CLB2;GIN4	GO Biological Process AutoRIF
inositol_metabolic_process_(GO:0006020)	4/322	0.00417792	0.00764133	0.318754	0.473824	-0.43551	2.3857	RAD53;DUN1;CDC28;PHO5	GO Biological Process AutoRIF
regulation_of_mitotic_spindle_organization_(GO:0060236)	2/48	0.00435711	0.00795017	0.0704046	0.144951	-0.629373	3.42124	CDC28;BUB1	GO Biological Process AutoRIF
regulation_of_actin_cytoskeleton_organization_(GO:0032956)	3/164	0.00459214	0.00810904	0.106826	0.188179	-0.620942	3.34279	RAD53;MCM3;MCM2	GO Biological Process AutoRIF predicted Zscore
L-serine_metabolic_process_(GO:0006563)	3/164	0.00459214	0.00810904	0.106826	0.188179	-0.468116	2.52006	RAD53;SWI4;IRR1	GO Biological Process AutoRIF predicted Zscore
vesicle_docking_(GO:0048278)	3/165	0.00467057	0.00822748	0.108269	0.19026	-0.495359	2.65833	RAD53;SWI4;MCM5	GO Biological Process AutoRIF predicted Zscore
regulation_of_translation_(GO:0006417)	4/332	0.00465536	0.00847429	0.339121	0.49549	-0.423953	2.27651	RAD53;CLN2;DUN1;CDC28	GO Biological Process AutoRIF
ATP_export_(GO:1904669)	3/165	0.00467057	0.00848194	0.180866	0.310171	-0.547661	2.93901	HSL1;CDC28;FAR1	GO Biological Process AutoRIF
organelle_transport_along_microtubule_(GO:0072384)	3/167	0.00482988	0.00848746	0.11118	0.194858	-0.575677	3.07005	PDS1;SWI4;IRR1	GO Biological Process AutoRIF predicted Zscore
cell_size	2/53	0.00528848	0.00849302	0.129761	0.230221	-0.52332	2.74336	CDC20;SWI4	Phenotype AutoRIF
ionizing_radiation_resistance	3/173	0.00532744	0.00849302	0.326694	0.490758	-0.206264	1.07977	RAD53;DUN1;PDS1	Phenotype AutoRIF
establishment_or_maintenance_of_actin_cytoskeleton_polarity_(GO:0030950)	2/50	0.00471956	0.00855074	0.0753882	0.153976	-0.742282	3.97569	CDC28;SMC3	GO Biological Process AutoRIF
mitochondrial_rho-_mutation_frequency	2/54	0.00548479	0.00861895	0.133631	0.233324	-0.422426	2.19905	DUN1;CDC28	Phenotype AutoRIF
translational_elongation_(GO:0006414)	4/335	0.00480548	0.00868596	0.345251	0.502375	-0.329926	1.76114	MCD1;CDC28;MCM5;MCM2	GO Biological Process AutoRIF
histone_methylation_(GO:0016571)	3/167	0.00482988	0.00870962	0.185283	0.316337	-0.660244	3.52104	CDC20;RAD53;CDC28	GO Biological Process AutoRIF
signal_peptide_processing_(GO:0006465)	3/169	0.00499245	0.00873075	0.114122	0.198616	-0.752544	3.98835	RAD53;MCM7;CLB2	GO Biological Process AutoRIF predicted Zscore
regulation_of_phosphorylation_(GO:0042325)	3/169	0.00499245	0.00873075	0.114122	0.198616	-0.489949	2.59665	RAD53;SWI4;IRR1	GO Biological Process AutoRIF predicted Zscore
ceramide_biosynthetic_process_(GO:0046513)	3/169	0.00499245	0.0089608	0.18973	0.321663	-0.570009	3.02095	RAD53;MRC1;CDC28	GO Biological Process AutoRIF
ceramide_metabolic_process_(GO:0006672)	3/169	0.00499245	0.0089608	0.18973	0.321663	-0.567167	3.00589	RAD53;MRC1;CDC28	GO Biological Process AutoRIF
protein_methylation_(GO:0006479)	3/171	0.0051583	0.00897742	0.117094	0.202814	-0.61773	3.25368	CDC45;MCM6;MCM2	GO Biological Process AutoRIF predicted Zscore
mRNA_3'-end_processing_(GO:0031124)	3/171	0.0051583	0.00897742	0.117094	0.202814	-0.578951	3.04942	CDC45;MCM6;MCM2	GO Biological Process AutoRIF predicted Zscore
response_to_UV_(GO:0009411)	3/174	0.00541326	0.00969351	0.200971	0.338616	-0.400096	2.08806	RAD53;DUN1;SMC3	GO Biological Process AutoRIF
regulation_of_antisense_RNA_transcription_(GO:0060194)	3/176	0.00558738	0.00970088	0.124654	0.214879	-0.516837	2.68096	RAD53;MCM3;MCM6	GO Biological Process AutoRIF predicted Zscore
positive_regulation_of_gene_expression_(GO:0010628)	3/177	0.0056757	0.00978383	0.126187	0.21598	-0.579209	2.99541	RAD53;MCM3;SWI4	GO Biological Process AutoRIF predicted Zscore
regulation_of_protein_phosphorylation_(GO:0001932)	3/177	0.0056757	0.00978383	0.126187	0.21598	-0.465702	2.40841	RAD53;SWI4;IRR1	GO Biological Process AutoRIF predicted Zscore
positive_regulation_of_GTPase_activity_(GO:0043547)	3/177	0.0056757	0.00978383	0.126187	0.21598	-0.376429	1.94672	RAD53;MCM7;MCM3	GO Biological Process AutoRIF predicted Zscore
chronological_lifespan	3/184	0.0063175	0.00978768	0.361825	0.507241	-0.1323	0.670025	RAD53;CDC28;BUB1	Phenotype AutoRIF
antisense_RNA_transcript_catabolic_process_(GO:0071041)	2/54	0.00548479	0.0097988	0.0856816	0.170919	-0.590562	3.07433	CDC45;MCM3	GO Biological Process AutoRIF
posttranscriptional_regulation_of_gene_expression_(GO:0010608)	3/178	0.00576486	0.00991391	0.127728	0.218102	-0.701241	3.61558	RAD53;MCM3;MCM6	GO Biological Process AutoRIF predicted Zscore
positive_regulation_of_protein_catabolic_process_(GO:0045732)	3/179	0.00585485	0.0100211	0.129276	0.219708	-0.561855	2.88821	RAD53;SWI4;IRR1	GO Biological Process AutoRIF predicted Zscore
regulation_of_protein_kinase_activity_(GO:0045859)	3/179	0.00585485	0.0100211	0.129276	0.219708	-0.500122	2.57087	RAD53;SWI4;IRR1	GO Biological Process AutoRIF predicted Zscore
regulation_of_actin_filament_polymerization_(GO:0030833)	2/55	0.00568441	0.0101085	0.0883192	0.174374	-0.751198	3.88371	CLB2;CDC28	GO Biological Process AutoRIF
positive_regulation_of_cell_proliferation_(GO:0008284)	2/55	0.00568441	0.0101085	0.0883192	0.174374	-0.681637	3.52408	SIC1;CLB2	GO Biological Process AutoRIF
chronological_cell_aging_(GO:0001300)	3/179	0.00585485	0.0103876	0.212376	0.355499	-0.705974	3.62905	RAD53;CDC45;BUB1	GO Biological Process AutoRIF
positive_regulation_of_protein_metabolic_process_(GO:0051247)	3/182	0.0061299	0.0104671	0.13396	0.226605	-0.544723	2.77513	RAD53;SWI4;IRR1	GO Biological Process AutoRIF predicted Zscore
vesicle_distribution	3/189	0.00680148	0.0107336	0.28582	0.437	-0.23871	1.19131	RAD53;SWI4;MCM4	Phenotype AutoRIF predicted Zscore
termination_of_RNA_polymerase_I_transcription_(GO:0006363)	3/184	0.0063175	0.0107621	0.137117	0.231405	-0.472928	2.39511	HSL1;MCD1;GIN4	GO Biological Process AutoRIF predicted Zscore
positive_regulation_of_protein_phosphorylation_(GO:0001934)	3/186	0.00650852	0.0109841	0.1403	0.234589	-0.660602	3.3259	RAD53;SWI4;IRR1	GO Biological Process AutoRIF predicted Zscore
positive_regulation_of_transcription_by_pheromones_(GO:0009371)	3/186	0.00650852	0.0109841	0.1403	0.234589	-0.601933	3.03052	MCM3;PCL2;MCM1	GO Biological Process AutoRIF predicted Zscore
vesicle_fusion_with_Golgi_apparatus_(GO:0048280)	3/186	0.00650852	0.0109841	0.1403	0.234589	-0.569456	2.86701	RAD53;SWI4;MCM2	GO Biological Process AutoRIF predicted Zscore
activation_of_GTPase_activity_(GO:0090630)	3/186	0.00650852	0.0109841	0.1403	0.234589	-0.453728	2.28436	RAD53;MCM3;MCM4	GO Biological Process AutoRIF predicted Zscore
phospholipid_translocation_(GO:0045332)	3/187	0.00660531	0.0110957	0.141901	0.236176	-0.552471	2.77334	MCM7;MCM3;MCM4	GO Biological Process AutoRIF predicted Zscore
regulation_of_Rho_protein_signal_transduction_(GO:0035023)	3/187	0.00660531	0.0110957	0.141901	0.236176	-0.533984	2.68054	RAD53;MCM3;SWI4	GO Biological Process AutoRIF predicted Zscore
cell_cycle_progression_in_mid_anaphase	3/200	0.00794245	0.0111415	0.315851	0.437	-0.46291	2.23842	PDS1;SWI4;IRR1	Phenotype AutoRIF predicted Zscore
cell_cycle_passage_through_START	3/200	0.00794245	0.0111415	0.315851	0.437	-0.412399	1.99417	CDC20;CLB6;PDS1	Phenotype AutoRIF predicted Zscore
prion_inheritance	3/200	0.00794245	0.0111415	0.315851	0.437	-0.280344	1.35561	RAD53;MCM7;SWI5	Phenotype AutoRIF predicted Zscore
sporulation	3/200	0.00794245	0.0111415	0.315851	0.437	-0.230812	1.1161	CDC20;PDS1;SWI4	Phenotype AutoRIF predicted Zscore
Golgi_distribution	3/200	0.00794245	0.0111415	0.315851	0.437	-0.160985	0.778449	RAD53;MCM7;MCM4	Phenotype AutoRIF predicted Zscore
Golgi_morphology	3/200	0.00794245	0.0111415	0.315851	0.437	-0.145212	0.702178	RAD53;MCM4;MCM2	Phenotype AutoRIF predicted Zscore
nuclear_export	3/200	0.00794245	0.0111415	0.315851	0.437	-0.0900167	0.435279	RAD53;MCM7;CLB2	Phenotype AutoRIF predicted Zscore
ribophagy	3/200	0.00794245	0.0111415	0.315851	0.437	-0.0276232	0.133573	RAD53;MCM4;MCM6	Phenotype AutoRIF predicted Zscore
bipolar_cellular_bud_site_selection_(GO:0007121)	2/58	0.00630301	0.0111571	0.0963764	0.185989	-0.557204	2.8232	MAD2;CLB2	GO Biological Process AutoRIF
negative_regulation_of_actin_nucleation_(GO:0051126)	3/188	0.00670296	0.0112337	0.143509	0.238185	-0.65636	3.28522	SWI4;MCM6;MCM1	GO Biological Process AutoRIF predicted Zscore
protein_processing_(GO:0016485)	4/366	0.00655204	0.0115713	0.408674	0.558577	-0.28462	1.43106	CLN2;DUN1;YOX1;CDC28	GO Biological Process AutoRIF
positive_regulation_of_ATPase_activity_(GO:0032781)	3/192	0.00710219	0.0118753	0.150003	0.244242	-0.429219	2.1235	RAD53;SWI4;IRR1	GO Biological Process AutoRIF predicted Zscore
early_endosome_to_Golgi_transport_(GO:0034498)	3/200	0.00794245	0.0121315	0.163278	0.244242	-0.809543	3.91457	RAD53;MCM4;MCM2	GO Biological Process AutoRIF predicted Zscore
poly(A)+_mRNA_export_from_nucleus_(GO:0016973)	3/200	0.00794245	0.0121315	0.163278	0.244242	-0.796834	3.85312	RAD53;MCM7;CLB2	GO Biological Process AutoRIF predicted Zscore
cytoplasmic_translational_initiation_(GO:0002183)	3/200	0.00794245	0.0121315	0.163278	0.244242	-0.762703	3.68808	RAD53;MCM7;CLB2	GO Biological Process AutoRIF predicted Zscore
nuclear_export_(GO:0051168)	3/200	0.00794245	0.0121315	0.163278	0.244242	-0.759605	3.6731	RAD53;MCM7;CLB2	GO Biological Process AutoRIF predicted Zscore
nucleic_acid_metabolic_process_(GO:0090304)	3/200	0.00794245	0.0121315	0.163278	0.244242	-0.698762	3.37889	CLB2;MCM6;MCM2	GO Biological Process AutoRIF predicted Zscore
RNA_polymerase_III_transcriptional_preinitiation_complex_assembly_(GO:0070898)	3/200	0.00794245	0.0121315	0.163278	0.244242	-0.69456	3.35857	HSL1;GIN4;BUB1	GO Biological Process AutoRIF predicted Zscore
nuclear_pore_complex_assembly_(GO:0051292)	3/200	0.00794245	0.0121315	0.163278	0.244242	-0.682031	3.29798	RAD53;MCM7;CLB2	GO Biological Process AutoRIF predicted Zscore
protein_autophosphorylation_(GO:0046777)	3/194	0.00730701	0.0121315	0.153286	0.244242	-0.634881	3.12293	RAD53;SWI4;IRR1	GO Biological Process AutoRIF predicted Zscore
regulation_of_phosphatidylinositol_dephosphorylation_(GO:0060304)	3/200	0.00794245	0.0121315	0.163278	0.244242	-0.633909	3.06529	SWI4;MCM5;IRR1	GO Biological Process AutoRIF predicted Zscore
tRNA_transport_(GO:0051031)	3/200	0.00794245	0.0121315	0.163278	0.244242	-0.631253	3.05245	RAD53;MCM7;CLB2	GO Biological Process AutoRIF predicted Zscore
positive_regulation_of_reproductive_process_(GO:2000243)	3/200	0.00794245	0.0121315	0.163278	0.244242	-0.611886	2.95879	PDS1;SWI4;IRR1	GO Biological Process AutoRIF predicted Zscore
CUT_catabolic_process_(GO:0071034)	3/200	0.00794245	0.0121315	0.163278	0.244242	-0.604652	2.92382	MCM7;MCM3;MCM4	GO Biological Process AutoRIF predicted Zscore
microtubule_cytoskeleton_organization_involved_in_mitosis_(GO:1902850)	3/200	0.00794245	0.0121315	0.163278	0.244242	-0.590997	2.85779	IRR1;SMC3;SMC1	GO Biological Process AutoRIF predicted Zscore
tRNA_transcription_(GO:0009304)	3/200	0.00794245	0.0121315	0.163278	0.244242	-0.582124	2.81488	RAD53;MCM6;MCM2	GO Biological Process AutoRIF predicted Zscore
positive_regulation_of_cellular_response_to_amino_acid_starvation_(GO:1903833)	3/200	0.00794245	0.0121315	0.163278	0.244242	-0.580758	2.80828	SWI4;MCM4;MCM6	GO Biological Process AutoRIF predicted Zscore
regulation_of_cellular_localization_(GO:0060341)	3/200	0.00794245	0.0121315	0.163278	0.244242	-0.578338	2.79657	PDS1;SWI4;IRR1	GO Biological Process AutoRIF predicted Zscore
Rab_protein_signal_transduction_(GO:0032482)	3/200	0.00794245	0.0121315	0.163278	0.244242	-0.565458	2.73429	CDC20;PDS1;SWI4	GO Biological Process AutoRIF predicted Zscore
vesicle_organization_(GO:0016050)	3/200	0.00794245	0.0121315	0.163278	0.244242	-0.55903	2.70321	RAD53;SWI4;MCM4	GO Biological Process AutoRIF predicted Zscore
protein_lipidation_(GO:0006497)	3/200	0.00794245	0.0121315	0.163278	0.244242	-0.550688	2.66287	CDC20;PDS1;SWI4	GO Biological Process AutoRIF predicted Zscore
phosphatidylinositol_dephosphorylation_(GO:0046856)	3/200	0.00794245	0.0121315	0.163278	0.244242	-0.549999	2.65954	SWI4;MCM4;IRR1	GO Biological Process AutoRIF predicted Zscore
regulation_of_translational_termination_(GO:0006449)	3/200	0.00794245	0.0121315	0.163278	0.244242	-0.538974	2.60623	RAD53;MCM7;CLB2	GO Biological Process AutoRIF predicted Zscore
RNA_biosynthetic_process_(GO:0032774)	3/200	0.00794245	0.0121315	0.163278	0.244242	-0.537668	2.59991	RAD53;MCM6;MCM2	GO Biological Process AutoRIF predicted Zscore
regulation_of_RNA_metabolic_process_(GO:0051252)	3/200	0.00794245	0.0121315	0.163278	0.244242	-0.522109	2.52468	RAD53;MCM6;MCM2	GO Biological Process AutoRIF predicted Zscore
endoplasmic_reticulum_organization_(GO:0007029)	3/200	0.00794245	0.0121315	0.163278	0.244242	-0.520509	2.51694	RAD53;CLB2;MCM4	GO Biological Process AutoRIF predicted Zscore
C-terminal_protein_lipidation_(GO:0006501)	3/200	0.00794245	0.0121315	0.163278	0.244242	-0.499944	2.41749	CDC20;CLB5;PDS1	GO Biological Process AutoRIF predicted Zscore
regulation_of_Cvt_pathway_(GO:2001159)	3/200	0.00794245	0.0121315	0.163278	0.244242	-0.487221	2.35597	SWI4;IRR1;SMC3	GO Biological Process AutoRIF predicted Zscore
negative_regulation_of_phospholipid_biosynthetic_process_(GO:0071072)	3/200	0.00794245	0.0121315	0.163278	0.244242	-0.465592	2.25138	CDC20;PDS1;SWI4	GO Biological Process AutoRIF predicted Zscore
actin_filament_organization_(GO:0007015)	3/197	0.00762078	0.0121315	0.158256	0.244242	-0.460376	2.2452	RAD53;MCM3;MCM4	GO Biological Process AutoRIF predicted Zscore
mRNA_cleavage_involved_in_mRNA_processing_(GO:0098787)	3/200	0.00794245	0.0121315	0.163278	0.244242	-0.445913	2.15623	RAD53;MCM6;MCM2	GO Biological Process AutoRIF predicted Zscore
regulation_of_vesicle_fusion_(GO:0031338)	3/200	0.00794245	0.0121315	0.163278	0.244242	-0.442066	2.13762	RAD53;SWI4;MCM2	GO Biological Process AutoRIF predicted Zscore
ribophagy_(GO:0034517)	3/200	0.00794245	0.0121315	0.163278	0.244242	-0.435373	2.10526	RAD53;MCM4;MCM6	GO Biological Process AutoRIF predicted Zscore
positive_regulation_of_mitotic_cell_cycle_(GO:0045931)	3/200	0.00794245	0.0121315	0.163278	0.244242	-0.425745	2.0587	PDS1;SWI4;IRR1	GO Biological Process AutoRIF predicted Zscore
nuclear_mRNA_surveillance_(GO:0071028)	3/200	0.00794245	0.0121315	0.163278	0.244242	-0.421927	2.04024	RAD53;MCM6;MCM2	GO Biological Process AutoRIF predicted Zscore
mRNA_polyadenylation_(GO:0006378)	3/200	0.00794245	0.0121315	0.163278	0.244242	-0.420402	2.03287	RAD53;MCM6;MCM2	GO Biological Process AutoRIF predicted Zscore
regulation_of_protein_serine/threonine_kinase_activity_(GO:0071900)	3/200	0.00794245	0.0121315	0.163278	0.244242	-0.404048	1.95379	RAD53;SWI4;IRR1	GO Biological Process AutoRIF predicted Zscore
regulation_of_actin_filament_polymerization_(GO:0030833)	3/200	0.00794245	0.0121315	0.163278	0.244242	-0.391672	1.89394	RAD53;MCM3;MCM4	GO Biological Process AutoRIF predicted Zscore
mitotic_actomyosin_contractile_ring_assembly_(GO:1903475)	3/200	0.00794245	0.0121315	0.163278	0.244242	-0.385072	1.86203	CDC20;CLB1;PDS1	GO Biological Process AutoRIF predicted Zscore
protein_localization_to_membrane_(GO:0072657)	3/200	0.00794245	0.0121315	0.163278	0.244242	-0.340426	1.64614	RAD53;SWI4;MCM4	GO Biological Process AutoRIF predicted Zscore
Rho_protein_signal_transduction_(GO:0007266)	3/199	0.00783435	0.0121315	0.161598	0.244242	-0.333798	1.61867	RAD53;MCM3;SWI4	GO Biological Process AutoRIF predicted Zscore
protein_localization_to_plasma_membrane_(GO:0072659)	3/200	0.00794245	0.0121315	0.163278	0.244242	-0.327958	1.58585	RAD53;SWI4;MCM4	GO Biological Process AutoRIF predicted Zscore
transcriptional_start_site_selection_at_RNA_polymerase_II_promoter_(GO:0001174)	3/200	0.00794245	0.0121315	0.163278	0.244242	-0.208418	1.00781	HSL1;MCD1;GIN4	GO Biological Process AutoRIF predicted Zscore
negative_regulation_of_Ras_protein_signal_transduction_(GO:0046580)	2/62	0.00717337	0.0126396	0.107434	0.204763	-0.784022	3.87101	CDC20;RAD53	GO Biological Process AutoRIF
regulation of transcription, DNA-templated (GO:0006355)	3/177	0.0056757	0.0127414	0.203041	0.242767	-1.3117	6.78353	PCL9;SWI5;CDC28	GO Biological Process 2018
negative_regulation_of_gene_expression_(GO:0010629)	3/195	0.00741073	0.013028	0.249785	0.399034	-0.562746	2.76017	SIC1;SWI5;CDC28	GO Biological Process AutoRIF
maintenance_of_chromatin_silencing_at_telomere_(GO:0035392)	2/65	0.00785983	0.013786	0.115943	0.21894	-0.505066	2.44754	RAD53;MCM2	GO Biological Process AutoRIF
regulation_of_cell_growth_(GO:0001558)	3/200	0.00794245	0.0138993	0.261703	0.412934	-0.386827	1.87051	RAD53;MOB1;CDC28	GO Biological Process AutoRIF
organelle_assembly_(GO:0070925)	2/71	0.00931783	0.0142023	0.0897525	0.161243	-0.917207	4.2887	RAD53;MCM7	GO Biological Process AutoRIF predicted Zscore
error-free_translesion_synthesis_(GO:0070987)	2/67	0.00833332	0.0144194	0.121711	0.225826	-0.653228	3.12732	RAD53;CDC28	GO Biological Process AutoRIF
peptidyl-asparagine_modification_(GO:0018196)	2/67	0.00833332	0.0144194	0.121711	0.225826	-0.586417	2.80747	RAD53;CDC28	GO Biological Process AutoRIF
peptidyl-methionine_modification_(GO:0018206)	2/67	0.00833332	0.0144194	0.121711	0.225826	-0.585805	2.80454	RAD53;CDC28	GO Biological Process AutoRIF
peptidyl-serine_modification_(GO:0018209)	2/67	0.00833332	0.0144194	0.121711	0.225826	-0.581862	2.78566	RAD53;CDC28	GO Biological Process AutoRIF
actin_nucleation_(GO:0045010)	2/67	0.00833332	0.0144194	0.121711	0.225826	-0.472563	2.26239	CLB2;CDC28	GO Biological Process AutoRIF
protein localization to nucleus (GO:0034504)	2/59	0.00651575	0.0144794	0.0971789	0.155836	-1.16933	5.88584	CDC28;FAR1	GO Biological Process 2018
cell_fusion	3/218	0.0100407	0.01534	0.468216	0.613139	-0.155264	0.714385	CDC45;CDC28;MCM2	Phenotype AutoRIF
regulation_of_transport_(GO:0051049)	4/400	0.00890516	0.0153744	0.477137	0.611307	-0.430251	2.03127	SWI4;FAR1;CDC5;BUB1	GO Biological Process AutoRIF
organelle_fission_(GO:0048285)	3/215	0.00967076	0.0166588	0.297898	0.456026	-0.556703	2.58235	CLB2;MCD1;CDC28	GO Biological Process AutoRIF
cysteine_biosynthetic_process_(GO:0019344)	3/216	0.00979317	0.0167945	0.300328	0.457925	-0.242257	1.1207	PDS1;MCM3;CDC28	GO Biological Process AutoRIF
cysteine_metabolic_process_(GO:0006534)	3/216	0.00979317	0.0167945	0.300328	0.457925	-0.236333	1.09329	PDS1;MCM3;CDC28	GO Biological Process AutoRIF
tyrosine_metabolic_process_(GO:0006570)	2/74	0.0100886	0.0172628	0.14243	0.255644	-0.441515	2.02935	CDC20;CDC28	GO Biological Process AutoRIF
negative_regulation_of_protein_ubiquitination_(GO:0031397)	2/76	0.0106178	0.0181279	0.148486	0.264662	-0.475971	2.16339	HSL1;MCM1	GO Biological Process AutoRIF
ribonucleoprotein_complex_assembly_(GO:0022618)	3/223	0.0106755	0.0181861	0.317374	0.472685	-0.20143	0.914454	CDC45;CLB2;SWI5	GO Biological Process AutoRIF
nuclear_migration_(GO:0007097)	2/81	0.0119932	0.0182418	0.111424	0.194858	-0.670059	2.96395	SWI4;BUB1	GO Biological Process AutoRIF predicted Zscore
cellular protein metabolic process (GO:0044267)	2/67	0.00833332	0.0183333	0.119399	0.170459	-1.18511	5.67372	HSL1;CDC28	GO Biological Process 2018
negative_regulation_of_MAP_kinase_activity_(GO:0043407)	2/78	0.011159	0.0189678	0.154595	0.270541	-0.636211	2.86009	CDC28;FAR1	GO Biological Process AutoRIF
Rho_protein_signal_transduction_(GO:0007266)	3/229	0.0114675	0.0194492	0.332018	0.488977	-0.575169	2.56999	CLN2;CDC28;FAR1	GO Biological Process AutoRIF
protein_localization_to_organelle_(GO:0033365)	3/230	0.0116027	0.0196353	0.33446	0.489609	-0.331364	1.47673	CLB2;CDC5;MCM2	GO Biological Process AutoRIF
telomere_organization_(GO:0032200)	2/80	0.0117122	0.0197771	0.160754	0.280046	-0.449945	2.00096	CDC28;MCM1	GO Biological Process AutoRIF
iron-sulfur_cluster_assembly_(GO:0016226)	2/81	0.0119932	0.0202074	0.163851	0.284797	-0.424014	1.87559	RAD53;DUN1	GO Biological Process AutoRIF
ribonucleoprotein_complex_disassembly_(GO:0032988)	2/86	0.0134426	0.0204034	0.122736	0.212079	-0.275873	1.18883	HSL1;BUB1	GO Biological Process AutoRIF predicted Zscore
stress_resistance	3/247	0.0140436	0.0211616	0.553016	0.680224	-0.0437028	0.186418	RAD53;DUN1;YOX1	Phenotype AutoRIF
negative_regulation_of_chromatin_organization_(GO:1905268)	2/89	0.014347	0.0217306	0.129656	0.219839	-0.728061	3.09004	CLN2;FAR1	GO Biological Process AutoRIF predicted Zscore
histidine_metabolic_process_(GO:0006547)	3/242	0.0132977	0.0223564	0.363744	0.519474	-0.439466	1.89857	HSL1;CDC28;PHO5	GO Biological Process AutoRIF
histidine_biosynthetic_process_(GO:0000105)	3/245	0.0137424	0.0230036	0.371049	0.527136	-0.414431	1.77678	HSL1;CDC28;PHO5	GO Biological Process AutoRIF
nuclear_envelope_organization_(GO:0006998)	2/87	0.0137412	0.0230036	0.182654	0.312541	-0.32889	1.41007	CDC20;CDC28	GO Biological Process AutoRIF
maintenance_of_DNA_trinucleotide_repeats_(GO:0035753)	1/7	0.0142642	0.0237223	0.0679949	0.140365	-1.35745	5.76916	RAD53	GO Biological Process AutoRIF
protein_localization_to_chromosome,_centromeric_region_(GO:0071459)	1/7	0.0142642	0.0237223	0.0679949	0.140365	-1.285	5.46124	CDC28	GO Biological Process AutoRIF
DNA_topological_change_(GO:0006265)	1/7	0.0142642	0.0237223	0.0679949	0.140365	-1.13988	4.8445	MCM5	GO Biological Process AutoRIF
transcription-coupled_nucleotide-excision_repair_(GO:0006283)	2/89	0.014347	0.0238086	0.188996	0.321663	-0.491935	2.08788	RAD53;DUN1	GO Biological Process AutoRIF
negative_regulation_of_cell_growth_(GO:0030308)	3/251	0.0146573	0.0242712	0.385623	0.538893	-0.472873	1.99686	CDC20;SWI4;CDC28	GO Biological Process AutoRIF
regulation of double-strand break repair via nonhomologous end joining (GO:2001032)	1/6	0.0122387	0.0244773	0.0590726	0.123771	-2.54684	11.2141	CDC28	GO Biological Process 2018
regulation of cellular ketone metabolic process by positive regulation of transcription from RNA polymerase II promoter (GO:0072366)	1/6	0.0122387	0.0244773	0.0590726	0.123771	-2.04742	9.01512	MCM1	GO Biological Process 2018
positive regulation of metaphase/anaphase transition of cell cycle (GO:1902101)	1/6	0.0122387	0.0244773	0.0590726	0.123771	-1.99654	8.79108	CDC20	GO Biological Process 2018
positive regulation of mitotic sister chromatid separation (GO:1901970)	1/6	0.0122387	0.0244773	0.0590726	0.123771	-1.97406	8.69209	CDC20	GO Biological Process 2018
negative regulation of phosphorylation (GO:0042326)	1/6	0.0122387	0.0244773	0.0590726	0.123771	-1.94738	8.57463	RAD53	GO Biological Process 2018
maintenance of protein localization in organelle (GO:0072595)	1/6	0.0122387	0.0244773	0.0590726	0.123771	-1.91512	8.43255	FAR1	GO Biological Process 2018
nuclear division (GO:0000280)	1/6	0.0122387	0.0244773	0.0590726	0.123771	-1.90725	8.3979	DBF2	GO Biological Process 2018
negative regulation of protein dephosphorylation (GO:0035308)	1/6	0.0122387	0.0244773	0.0590726	0.123771	-1.82756	8.04703	CLB2	GO Biological Process 2018
negative regulation of ATPase activity (GO:0032780)	1/6	0.0122387	0.0244773	0.0590726	0.123771	-1.76833	7.78623	MCM2	GO Biological Process 2018
organelle assembly (GO:0070925)	2/80	0.0117122	0.0244773	0.157821	0.206903	-1.43388	6.37664	GIN4;KCC4	GO Biological Process 2018
regulation_of_secretion_by_cell_(GO:1903530)	2/95	0.0162326	0.0245354	0.143766	0.238185	-0.482391	1.9878	RAD53;MCM3	GO Biological Process AutoRIF predicted Zscore
coenzyme_A_biosynthetic_process_(GO:0015937)	3/256	0.0154456	0.0253584	0.397721	0.546867	-0.317958	1.32602	RAD53;CLB5;SMC3	GO Biological Process AutoRIF
coenzyme_A_metabolic_process_(GO:0015936)	3/256	0.0154456	0.0253584	0.397721	0.546867	-0.316409	1.31956	RAD53;CLB5;SMC3	GO Biological Process AutoRIF
negative_regulation_of_cellular_biosynthetic_process_(GO:0031327)	3/256	0.0154456	0.0253584	0.397721	0.546867	-0.255689	1.06633	SIC1;SWI5;CDC28	GO Biological Process AutoRIF
negative_regulation_of_cellular_catabolic_process_(GO:0031330)	3/256	0.0154456	0.0253584	0.397721	0.546867	-0.252546	1.05323	SIC1;SWI5;CDC28	GO Biological Process AutoRIF
regulation of DNA biosynthetic process (GO:2000278)	1/7	0.0142642	0.0255132	0.0672287	0.126413	-2.33599	9.92795	CDC28	GO Biological Process 2018
regulation of transcription involved in G2/M transition of mitotic cell cycle (GO:0000117)	1/7	0.0142642	0.0255132	0.0672287	0.126413	-2.26576	9.62948	MCM1	GO Biological Process 2018
protein localization to cell cortex (GO:0072697)	1/7	0.0142642	0.0255132	0.0672287	0.126413	-2.01503	8.56388	HSL1	GO Biological Process 2018
positive regulation of protein metabolic process (GO:0051247)	1/7	0.0142642	0.0255132	0.0672287	0.126413	-1.95334	8.30171	CDC20	GO Biological Process 2018
positive regulation of mitotic metaphase/anaphase transition (GO:0045842)	1/7	0.0142642	0.0255132	0.0672287	0.126413	-1.92652	8.1877	CDC20	GO Biological Process 2018
negative regulation of protein modification process (GO:0031400)	1/7	0.0142642	0.0255132	0.0672287	0.126413	-1.89898	8.07067	CLB2	GO Biological Process 2018
positive regulation of mitotic cell cycle (GO:0045931)	1/7	0.0142642	0.0255132	0.0672287	0.126413	-1.89613	8.05858	CDC28	GO Biological Process 2018
regulation of ubiquitin protein ligase activity (GO:1904666)	1/7	0.0142642	0.0255132	0.0672287	0.126413	-1.84391	7.83664	CDC20	GO Biological Process 2018
negative regulation of macroautophagy (GO:0016242)	1/7	0.0142642	0.0255132	0.0672287	0.126413	-1.82532	7.7576	SIC1	GO Biological Process 2018
regulation of G2/M transition of mitotic cell cycle (GO:0010389)	1/7	0.0142642	0.0255132	0.0672287	0.126413	-1.82106	7.73952	CDC28	GO Biological Process 2018
negative regulation of mitotic cell cycle (GO:0045930)	1/7	0.0142642	0.0255132	0.0672287	0.126413	-1.75311	7.45074	CDC28	GO Biological Process 2018
positive regulation of catabolic process (GO:0009896)	1/7	0.0142642	0.0255132	0.0672287	0.126413	-1.58715	6.7454	CDC20	GO Biological Process 2018
positive regulation of transcription, DNA-templated (GO:0045893)	3/241	0.0131513	0.0255132	0.354398	0.376654	-1.19431	5.17283	SWI4;CDC28;MCM1	GO Biological Process 2018
negative_regulation_of_cellular_protein_metabolic_process_(GO:0032269)	3/257	0.0156061	0.0255674	0.400135	0.549205	-0.255951	1.06478	SIC1;SWI5;CDC28	GO Biological Process AutoRIF
petite	3/267	0.0172633	0.0256616	0.60695	0.717898	-0.140147	0.56888	RAD53;DUN1;CDC28	Phenotype AutoRIF
positive_regulation_of_protein_serine/threonine_kinase_activity_(GO:0071902)	1/8	0.0162856	0.0265115	0.0761704	0.154345	-1.22515	5.04454	RAD53	GO Biological Process AutoRIF
inorganic_anion_transmembrane_transport_(GO:0098661)	1/8	0.0162856	0.0265115	0.0761704	0.154345	-1.18384	4.87445	PHO5	GO Biological Process AutoRIF
mitotic_cytokinetic_process_(GO:1902410)	1/8	0.0162856	0.0265115	0.0761704	0.154345	-1.14389	4.70992	CDC28	GO Biological Process AutoRIF
invasive_growth	2/103	0.0189022	0.0273584	0.339069	0.490758	-0.229099	0.909174	HSL1;CDC28	Phenotype AutoRIF
colony_color	2/103	0.0189022	0.0273584	0.339069	0.490758	-0.0961878	0.381719	RAD53;DUN1	Phenotype AutoRIF
tetrahydrofolate_biosynthetic_process_(GO:0046654)	2/97	0.0168836	0.0273692	0.214655	0.357759	-0.243557	0.994056	CDC28;MCM2	GO Biological Process AutoRIF
tetrahydrofolate_metabolic_process_(GO:0046653)	2/97	0.0168836	0.0273692	0.214655	0.357759	-0.241635	0.986212	CDC28;MCM2	GO Biological Process AutoRIF
cellular_amino_acid_biosynthetic_process_(GO:0008652)	2/101	0.0182184	0.0274223	0.158193	0.244242	-0.528208	2.11564	RAD53;MCM3	GO Biological Process AutoRIF predicted Zscore
cellular_amino_acid_catabolic_process_(GO:0009063)	2/101	0.0182184	0.0274223	0.158193	0.244242	-0.525947	2.10659	RAD53;MCM3	GO Biological Process AutoRIF predicted Zscore
cellular_response_to_hydrogen_peroxide_(GO:0070301)	3/267	0.0172633	0.0279259	0.424138	0.56941	-0.530664	2.15406	RAD53;CDC28;MCM1	GO Biological Process AutoRIF
regulation of protein catabolic process (GO:0042176)	1/8	0.0162856	0.0279909	0.0753157	0.135815	-1.89808	7.81531	CDC20	GO Biological Process 2018
positive regulation of protein catabolic process (GO:0045732)	1/8	0.0162856	0.0279909	0.0753157	0.135815	-1.79992	7.41112	CDC20	GO Biological Process 2018
negative regulation of transcription involved in G1/S transition of mitotic cell cycle (GO:0071930)	1/8	0.0162856	0.0279909	0.0753157	0.135815	-1.76264	7.25763	YOX1	GO Biological Process 2018
negative regulation of nucleic acid-templated transcription (GO:1903507)	1/8	0.0162856	0.0279909	0.0753157	0.135815	-1.69794	6.99121	CDC28	GO Biological Process 2018
regulation of cell division (GO:0051302)	1/8	0.0162856	0.0279909	0.0753157	0.135815	-1.68989	6.95808	DBF2	GO Biological Process 2018
regulation_of_translational_initiation_(GO:0006446)	3/268	0.0174342	0.0281433	0.426524	0.56941	-0.203252	0.823034	SIC1;CLB2;CDC28	GO Biological Process AutoRIF
sphingolipid_biosynthetic_process_(GO:0030148)	3/269	0.0176061	0.0281845	0.428906	0.56941	-0.411368	1.66173	RAD53;MRC1;CDC28	GO Biological Process AutoRIF
sphingolipid_catabolic_process_(GO:0030149)	3/269	0.0176061	0.0281845	0.428906	0.56941	-0.408449	1.64993	RAD53;MRC1;CDC28	GO Biological Process AutoRIF
sphingolipid_metabolic_process_(GO:0006665)	3/269	0.0176061	0.0281845	0.428906	0.56941	-0.404852	1.6354	RAD53;MRC1;CDC28	GO Biological Process AutoRIF
nucleoside_triphosphate_metabolic_process_(GO:0009141)	2/99	0.0175455	0.0281845	0.221129	0.36617	-0.378345	1.52963	SMC1;MCM2	GO Biological Process AutoRIF
tryptophan_biosynthetic_process_(GO:0000162)	2/103	0.0189022	0.0282751	0.163064	0.244242	-0.636346	2.52533	MCM7;MCM3	GO Biological Process AutoRIF predicted Zscore
tryptophan_catabolic_process_(GO:0006569)	2/103	0.0189022	0.0282751	0.163064	0.244242	-0.636272	2.52503	MCM7;MCM3	GO Biological Process AutoRIF predicted Zscore
tryptophan_metabolic_process_(GO:0006568)	2/103	0.0189022	0.0282751	0.163064	0.244242	-0.628739	2.49514	MCM7;MCM3	GO Biological Process AutoRIF predicted Zscore
DNA_packaging_(GO:0006323)	2/100	0.0178806	0.0285645	0.224373	0.370744	-0.49333	1.98518	RAD53;CDC28	GO Biological Process AutoRIF
negative regulation of meiotic cell cycle (GO:0051447)	1/9	0.0183031	0.028762	0.0833343	0.137846	-2.01773	8.07229	CDC28	GO Biological Process 2018
negative regulation of mitotic nuclear division (GO:0045839)	1/9	0.0183031	0.028762	0.0833343	0.137846	-1.91514	7.66186	PDS1	GO Biological Process 2018
7-methylguanosine mRNA capping (GO:0006370)	1/9	0.0183031	0.028762	0.0833343	0.137846	-1.89391	7.57695	CDC28	GO Biological Process 2018
regulation of phosphorylation (GO:0042325)	1/9	0.0183031	0.028762	0.0833343	0.137846	-1.81568	7.26398	RAD53	GO Biological Process 2018
DNA double-strand break processing (GO:0000729)	1/9	0.0183031	0.028762	0.0833343	0.137846	-1.72303	6.8933	CDC28	GO Biological Process 2018
7-methylguanosine RNA capping (GO:0009452)	1/9	0.0183031	0.028762	0.0833343	0.137846	-1.72234	6.89056	CDC28	GO Biological Process 2018
negative regulation of mitotic cell cycle phase transition (GO:1901991)	1/9	0.0183031	0.028762	0.0833343	0.137846	-1.68048	6.72306	PDS1	GO Biological Process 2018
regulation of mitotic metaphase/anaphase transition (GO:0030071)	1/9	0.0183031	0.028762	0.0833343	0.137846	-1.65365	6.61576	CDC20	GO Biological Process 2018
positive regulation of cyclin-dependent protein kinase activity (GO:1904031)	1/9	0.0183031	0.028762	0.0833343	0.137846	-1.65203	6.60925	CLB2	GO Biological Process 2018
positive regulation of cyclin-dependent protein serine/threonine kinase activity (GO:0045737)	1/9	0.0183031	0.028762	0.0833343	0.137846	-1.62118	6.48585	CLB2	GO Biological Process 2018
regulation of organelle assembly (GO:1902115)	1/9	0.0183031	0.028762	0.0833343	0.137846	-1.50751	6.03108	CDC28	GO Biological Process 2018
cellular protein complex assembly (GO:0043623)	2/98	0.0172132	0.028762	0.214138	0.251927	-1.18597	4.81749	GIN4;KCC4	GO Biological Process 2018
intracellular_pH_reduction_(GO:0051452)	3/272	0.0181276	0.0288991	0.436036	0.576886	-0.403675	1.61887	RAD53;DUN1;MCM6	GO Biological Process AutoRIF
positive_regulation_of_reproductive_process_(GO:2000243)	1/9	0.0183031	0.0291185	0.0842759	0.168991	-0.918246	3.67361	CDC28	GO Biological Process AutoRIF
MAPK_cascade_(GO:0000165)	2/103	0.0189022	0.0298251	0.234128	0.379534	-0.528152	2.09596	SWI4;CDC28	GO Biological Process AutoRIF
positive_regulation_of_cellular_process_(GO:0048522)	2/103	0.0189022	0.0298251	0.234128	0.379534	-0.33862	1.34381	SWI4;CDC5	GO Biological Process AutoRIF
thiamine_biosynthetic_process_(GO:0009228)	2/103	0.0189022	0.0298251	0.234128	0.379534	-0.316474	1.25592	CDC20;PHO5	GO Biological Process AutoRIF
thiamine_metabolic_process_(GO:0006772)	2/103	0.0189022	0.0298251	0.234128	0.379534	-0.315429	1.25177	CDC20;PHO5	GO Biological Process AutoRIF
mitophagy	2/109	0.0210174	0.0300249	0.364292	0.507241	-0.19392	0.748998	DUN1;CLB2	Phenotype AutoRIF
regulation_of_chromatin_silencing_(GO:0031935)	2/104	0.0192481	0.0302469	0.237387	0.3825	-0.433971	1.71433	RAD53;MCD1	GO Biological Process AutoRIF
nuclear_pore_distribution_(GO:0031081)	2/104	0.0192481	0.0302469	0.237387	0.3825	-0.30212	1.19348	DBF2;SWI5	GO Biological Process AutoRIF
positive regulation of DNA-dependent DNA replication (GO:2000105)	1/10	0.0203164	0.0312561	0.0912851	0.147667	-1.78696	6.96259	CDC28	GO Biological Process 2018
mitotic spindle assembly (GO:0090307)	1/10	0.0203164	0.0312561	0.0912851	0.147667	-1.72082	6.70486	CDC28	GO Biological Process 2018
asparagine catabolic process (GO:0006530)	1/10	0.0203164	0.0312561	0.0912851	0.147667	-1.69312	6.59696	SWI4	GO Biological Process 2018
chromatin_remodeling_(GO:0006338)	2/106	0.0199479	0.0312828	0.243913	0.391277	-0.433071	1.69532	RAD53;CDC28	GO Biological Process AutoRIF
regulation_of_organelle_assembly_(GO:1902115)	2/107	0.0203017	0.0317731	0.24718	0.395694	-0.257415	1.00316	CDC28;MCM2	GO Biological Process AutoRIF
protein_deubiquitination_(GO:0016579)	2/111	0.0217435	0.0324584	0.182816	0.272904	-0.54262	2.07739	SWI4;IRR1	GO Biological Process AutoRIF predicted Zscore
glucose_transmembrane_transport_(GO:1904659)	2/112	0.0221105	0.0329383	0.185311	0.27606	-0.673658	2.56778	RAD53;MCM3	GO Biological Process AutoRIF predicted Zscore
regulation of telomere maintenance via telomerase (GO:0032210)	1/11	0.0223258	0.0336416	0.0991686	0.155836	-2.13931	8.13368	CDC28	GO Biological Process 2018
exit from mitosis (GO:0010458)	1/11	0.0223258	0.0336416	0.0991686	0.155836	-1.81923	6.91674	CDC5	GO Biological Process 2018
regulation of cytokinesis (GO:0032465)	1/11	0.0223258	0.0336416	0.0991686	0.155836	-1.58944	6.04306	DBF2	GO Biological Process 2018
negative_regulation_of_protein_ubiquitination_(GO:0031397)	2/115	0.0232268	0.0345302	0.192829	0.28667	-0.553433	2.08226	RAD53;MCM3	GO Biological Process AutoRIF predicted Zscore
regulation_of_histone_H2B_ubiquitination_(GO:2001166)	2/112	0.0221105	0.0345337	0.263541	0.414983	-0.378793	1.44385	CDC28;MCM1	GO Biological Process AutoRIF
regulation of meiosis I (GO:0060631)	1/12	0.0243311	0.0347588	0.106985	0.159032	-1.76308	6.5516	CLB1	GO Biological Process 2018
meiotic sister chromatid segregation (GO:0045144)	1/12	0.0243311	0.0347588	0.106985	0.159032	-1.75281	6.51344	SMC3	GO Biological Process 2018
mitotic chromosome condensation (GO:0007076)	1/12	0.0243311	0.0347588	0.106985	0.159032	-1.71441	6.37075	MCD1	GO Biological Process 2018
positive regulation of transcription involved in G1/S transition of mitotic cell cycle (GO:0071931)	1/12	0.0243311	0.0347588	0.106985	0.159032	-1.63201	6.06453	SWI4	GO Biological Process 2018
attachment of mitotic spindle microtubules to kinetochore (GO:0051315)	1/12	0.0243311	0.0347588	0.106985	0.159032	-1.59831	5.93933	CDC28	GO Biological Process 2018
glutamine family amino acid catabolic process (GO:0009065)	1/12	0.0243311	0.0347588	0.106985	0.159032	-1.54917	5.75669	SWI4	GO Biological Process 2018
protein localization to kinetochore (GO:0034501)	1/12	0.0243311	0.0347588	0.106985	0.159032	-1.47077	5.4654	BUB1	GO Biological Process 2018
regulation of protein dephosphorylation (GO:0035304)	1/12	0.0243311	0.0347588	0.106985	0.159032	-1.44333	5.3634	CLB2	GO Biological Process 2018
actin_filament_organization_(GO:0007015)	2/113	0.02248	0.034969	0.266817	0.417579	-0.383825	1.45667	CLN2;CDC28	GO Biological Process AutoRIF
regulation_of_transcription_elongation_from_RNA_polymerase_II_promoter_(GO:0034243)	2/113	0.02248	0.034969	0.266817	0.417579	-0.360534	1.36827	MCM5;MCM2	GO Biological Process AutoRIF
positive_regulation_of_MAP_kinase_activity_(GO:0043406)	2/116	0.023604	0.0350191	0.195345	0.289815	-0.636332	2.38391	MCM7;MCM3	GO Biological Process AutoRIF predicted Zscore
plasma_membrane_organization_(GO:0007009)	3/296	0.0226095	0.0350288	0.49189	0.626846	-0.329266	1.24772	HSL1;RAD53;CDC28	GO Biological Process AutoRIF
mitochondrial_DNA_metabolic_process_(GO:0032042)	3/296	0.0226095	0.0350288	0.49189	0.626846	-0.287425	1.08916	RAD53;DUN1;BUB1	GO Biological Process AutoRIF
colony_shape	2/122	0.0259201	0.035862	0.341429	0.464659	-0.308417	1.12656	RAD53;MCM7	Phenotype AutoRIF predicted Zscore
mRNA_export_from_nucleus_(GO:0006406)	2/115	0.0232268	0.0359129	0.273369	0.426966	-0.363928	1.36926	DBF2;SWI5	GO Biological Process AutoRIF
pseudohyphal_growth	2/123	0.0263148	0.0359161	0.345044	0.464659	-0.296245	1.07763	RAD53;MCM3	Phenotype AutoRIF predicted Zscore
protein_deubiquitination_(GO:0016579)	2/116	0.023604	0.0363638	0.276645	0.431208	-0.362816	1.35923	SIC1;CLB5	GO Biological Process AutoRIF
regulation_of_TOR_signaling_(GO:0032006)	3/301	0.0236129	0.0363638	0.50322	0.633834	-0.258415	0.968013	RAD53;DUN1;CDC28	GO Biological Process AutoRIF
polyploidy	2/125	0.0271116	0.0365102	0.352257	0.46813	-0.087475	0.315592	RAD53;MCM3	Phenotype AutoRIF predicted Zscore
regulation of organelle organization (GO:0033043)	1/13	0.0263325	0.036899	0.114736	0.166065	-2.11839	7.70449	CDC5	GO Biological Process 2018
positive regulation of protein serine/threonine kinase activity (GO:0071902)	1/13	0.0263325	0.036899	0.114736	0.166065	-1.54896	5.6335	CLB2	GO Biological Process 2018
centromere complex assembly (GO:0034508)	1/13	0.0263325	0.036899	0.114736	0.166065	-1.51752	5.51915	BUB1	GO Biological Process 2018
actomyosin_contractile_ring_organization_(GO:0044837)	1/12	0.0243311	0.0373952	0.108178	0.205672	-0.870769	3.23578	DBF2	GO Biological Process AutoRIF
regulation_of_cellular_respiration_(GO:0043457)	3/308	0.025058	0.0384355	0.51888	0.645457	-0.321773	1.18624	RAD53;CDC28;MCM1	GO Biological Process AutoRIF
asparagine metabolic process (GO:0006528)	1/14	0.0283298	0.0384725	0.122421	0.170459	-1.76453	6.2885	SWI4	GO Biological Process 2018
aspartate family amino acid catabolic process (GO:0009068)	1/14	0.0283298	0.0384725	0.122421	0.170459	-1.69872	6.05397	SWI4	GO Biological Process 2018
intra-S DNA damage checkpoint (GO:0031573)	1/14	0.0283298	0.0384725	0.122421	0.170459	-1.52949	5.45085	MRC1	GO Biological Process 2018
traversing start control point of mitotic cell cycle (GO:0007089)	1/14	0.0283298	0.0384725	0.122421	0.170459	-1.42664	5.08432	CLN2	GO Biological Process 2018
positive regulation of cellular catabolic process (GO:0031331)	1/14	0.0283298	0.0384725	0.122421	0.170459	-1.39517	4.97216	CDC28	GO Biological Process 2018
double-strand_break_repair_via_single-strand_annealing_(GO:0045002)	2/123	0.0263148	0.038961	0.213074	0.314828	-0.532676	1.93768	GIN4;BUB1	GO Biological Process AutoRIF predicted Zscore
small_molecule_transport	2/127	0.027918	0.0393716	0.437691	0.587147	-0.0119439	0.042741	CLN2;CDC28	Phenotype AutoRIF
autophagosome_assembly_(GO:0000045)	2/124	0.026712	0.0394683	0.215622	0.317944	-0.391372	1.4178	PDS1;SWI4	GO Biological Process AutoRIF predicted Zscore
mitotic_actomyosin_contractile_ring_assembly_(GO:1903475)	1/13	0.0263325	0.0403101	0.11601	0.21894	-0.880057	3.20073	DBF2	GO Biological Process AutoRIF
anaphase-promoting complex-dependent catabolic process (GO:0031145)	1/15	0.0303231	0.0404308	0.130041	0.177695	-1.54844	5.41311	CDC20	GO Biological Process 2018
negative regulation of autophagy (GO:0010507)	1/15	0.0303231	0.0404308	0.130041	0.177695	-1.54327	5.39503	SIC1	GO Biological Process 2018
positive regulation of nucleic acid-templated transcription (GO:1903508)	1/15	0.0303231	0.0404308	0.130041	0.177695	-1.51176	5.28489	CDC28	GO Biological Process 2018
vesicle_budding_from_membrane_(GO:0006900)	2/126	0.0275136	0.0405699	0.220727	0.324809	-0.286092	1.02795	RAD53;SWI4	GO Biological Process AutoRIF predicted Zscore
cellular_protein_modification_process_(GO:0006464)	2/124	0.026712	0.0407291	0.302828	0.458735	-0.342096	1.23929	CLB2;CDC28	GO Biological Process AutoRIF
positive_regulation_of_gene_expression_(GO:0010628)	2/124	0.026712	0.0407291	0.302828	0.458735	-0.167313	0.606117	SWI4;CDC5	GO Biological Process AutoRIF
protein_monoubiquitination_(GO:0006513)	2/127	0.027918	0.0410827	0.223284	0.327241	-0.513154	1.83631	MCM6;MCM2	GO Biological Process AutoRIF predicted Zscore
siderophore_transport_(GO:0015891)	2/128	0.0283249	0.0415968	0.225843	0.330324	-0.247185	0.88097	MCM7;MCM3	GO Biological Process AutoRIF predicted Zscore
regulation_of_phosphate_transport_(GO:0010966)	2/126	0.0275136	0.0418685	0.309358	0.464378	-0.0848115	0.304734	CDC28;PHO5	GO Biological Process AutoRIF
positive_regulation_of_cell_communication_(GO:0010647)	2/129	0.0287342	0.0421124	0.228405	0.333398	-0.716989	2.54507	MCM7;MCM3	GO Biological Process AutoRIF predicted Zscore
negative regulation of chromatin silencing at telomere (GO:0031939)	1/16	0.0323124	0.0425673	0.137596	0.185712	-1.63776	5.62128	MCM5	GO Biological Process 2018
establishment of mitotic sister chromatid cohesion (GO:0034087)	1/16	0.0323124	0.0425673	0.137596	0.185712	-1.52651	5.23944	MCD1	GO Biological Process 2018
positive_regulation_of_phosphorylation_of_RNA_polymerase_II_C-terminal_domain_(GO:1901409)	1/14	0.0283298	0.0429408	0.123774	0.22638	-0.807712	2.87856	CDC28	GO Biological Process AutoRIF
double-strand_break_repair_via_break-induced_replication_(GO:0000727)	1/14	0.0283298	0.0429408	0.123774	0.22638	-0.799624	2.84973	RAD53	GO Biological Process AutoRIF
negative_regulation_of_translation_(GO:0017148)	2/132	0.0299763	0.0438441	0.236106	0.343945	-0.395705	1.38787	RAD53;MCM3	GO Biological Process AutoRIF predicted Zscore
fermentative_growth	3/337	0.0315461	0.043925	0.761492	0.834135	0.0598476	-0.206852	RAD53;DBF2;CDC28	Phenotype AutoRIF
regulation_of_intracellular_pH_(GO:0051453)	2/133	0.030395	0.0443669	0.238677	0.346297	-0.230668	0.805832	RAD53;SWI4	GO Biological Process AutoRIF predicted Zscore
mating_response	2/140	0.0333913	0.0443753	0.405507	0.527149	-0.214815	0.730255	RAD53;MCM3	Phenotype AutoRIF predicted Zscore
organelle fission (GO:0048285)	1/17	0.0342978	0.0443854	0.145087	0.192284	-1.36066	4.58907	DBF2	GO Biological Process 2018
regulation of cellular protein localization (GO:1903827)	1/17	0.0342978	0.0443854	0.145087	0.192284	-1.31547	4.43665	CDC28	GO Biological Process 2018
phosphorylation of RNA polymerase II C-terminal domain (GO:0070816)	1/17	0.0342978	0.0443854	0.145087	0.192284	-1.30085	4.38734	CDC28	GO Biological Process 2018
beta-glucan_biosynthetic_process_(GO:0051274)	2/131	0.0295599	0.0446296	0.325635	0.48219	-0.324462	1.14254	SWI4;CDC28	GO Biological Process AutoRIF
histone_modification_(GO:0016570)	2/131	0.0295599	0.0446296	0.325635	0.48219	-0.183626	0.646608	RAD53;CDC28	GO Biological Process AutoRIF
snRNA_catabolic_process_(GO:0016076)	2/133	0.030395	0.0458007	0.332123	0.488977	-0.340115	1.18819	DBF2;CLB2	GO Biological Process AutoRIF
endoplasmic_reticulum_inheritance_(GO:0048309)	2/136	0.0316653	0.0461281	0.246401	0.355367	-0.237726	0.820758	RAD53;CLB2	GO Biological Process AutoRIF predicted Zscore
negative regulation of transcription from RNA polymerase II promoter (GO:0000122)	2/147	0.0364988	0.0469575	0.371537	0.392972	-0.934061	3.09219	CDC28;MCM1	GO Biological Process 2018
response_to_amino_acid_(GO:0043200)	2/138	0.0325237	0.0472835	0.251557	0.362082	-0.37438	1.28255	RAD53;MCM3	GO Biological Process AutoRIF predicted Zscore
negative_regulation_of_transcription_from_RNA_polymerase_II_promoter_(GO:0000122)	2/139	0.0329564	0.0478165	0.254137	0.364347	-0.381663	1.30245	RAD53;MCM1	GO Biological Process AutoRIF predicted Zscore
serine_family_amino_acid_metabolic_process_(GO:0009069)	2/140	0.0333913	0.0482541	0.256718	0.366596	-0.232816	0.791447	RAD53;SWI4	GO Biological Process AutoRIF predicted Zscore
serine_family_amino_acid_biosynthetic_process_(GO:0009070)	2/140	0.0333913	0.0482541	0.256718	0.366596	-0.232302	0.7897	RAD53;SWI4	GO Biological Process AutoRIF predicted Zscore
positive regulation of macroautophagy (GO:0016239)	1/19	0.0382566	0.0483704	0.15988	0.206903	-1.50492	4.91123	PCL1	GO Biological Process 2018
DNA replication checkpoint (GO:0000076)	1/19	0.0382566	0.0483704	0.15988	0.206903	-1.45916	4.76188	MRC1	GO Biological Process 2018
chromosome condensation (GO:0030261)	1/19	0.0382566	0.0483704	0.15988	0.206903	-1.30016	4.243	MCD1	GO Biological Process 2018
positive_regulation_of_protein_modification_process_(GO:0031401)	1/16	0.0323124	0.0485949	0.139103	0.250842	-0.778446	2.67186	CDC5	GO Biological Process AutoRIF
glycogen_biosynthetic_process_(GO:0005978)	2/138	0.0325237	0.0487223	0.348273	0.50408	-0.395754	1.35577	CLB2;CDC28	GO Biological Process AutoRIF
glycogen_metabolic_process_(GO:0005977)	2/138	0.0325237	0.0487223	0.348273	0.50408	-0.39156	1.3414	CLB2;CDC28	GO Biological Process AutoRIF
autophagy	2/145	0.0355998	0.0489497	0.506572	0.647941	-0.0633893	0.21143	HSL1;DUN1	Phenotype AutoRIF
regulation of chromatin silencing (GO:0031935)	1/20	0.04023	0.0500034	0.167182	0.212601	-1.50803	4.8455	CDC45	GO Biological Process 2018
positive regulation of transcription from RNA polymerase II promoter in response to heat stress (GO:0061408)	1/20	0.04023	0.0500034	0.167182	0.212601	-1.23612	3.97183	SWI4	GO Biological Process 2018
protein localization to chromosome, centromeric region (GO:0071459)	1/20	0.04023	0.0500034	0.167182	0.212601	-1.23052	3.95385	BUB1	GO Biological Process 2018
macroautophagy_(GO:0016236)	2/141	0.0338285	0.0504805	0.357909	0.516085	-0.414123	1.40241	HSL1;DUN1	GO Biological Process AutoRIF
transcription_elongation_from_RNA_polymerase_II_promoter_(GO:0006368)	2/141	0.0338285	0.0504805	0.357909	0.516085	-0.312551	1.05844	MCM5;MCM2	GO Biological Process AutoRIF
negative_regulation_of_transcription_by_pheromones_(GO:0045996)	2/144	0.0351536	0.0506996	0.26705	0.380599	-0.639417	2.14079	MCM3;PCL2	GO Biological Process AutoRIF predicted Zscore
biotin_biosynthetic_process_(GO:0009102)	2/142	0.034268	0.0508407	0.36111	0.517793	-0.287364	0.969435	CDC45;MCM2	GO Biological Process AutoRIF
biotin_metabolic_process_(GO:0006768)	2/142	0.034268	0.0508407	0.36111	0.517793	-0.284155	0.958611	CDC45;MCM2	GO Biological Process AutoRIF
tRNA_metabolic_process_(GO:0006399)	2/142	0.034268	0.0508407	0.36111	0.517793	-0.132672	0.447576	DBF2;MCM5	GO Biological Process AutoRIF
tRNA_catabolic_process_(GO:0016078)	2/143	0.0347097	0.051397	0.364307	0.519474	-0.160341	0.538864	DBF2;MCM5	GO Biological Process AutoRIF
tRNA_gene_clustering_(GO:0070058)	2/146	0.0360482	0.0518864	0.272219	0.385688	-0.320704	1.06567	RAD53;MCM2	GO Biological Process AutoRIF predicted Zscore
nucleic_acid_metabolic_process_(GO:0090304)	2/144	0.0351536	0.0519545	0.367497	0.523055	-0.317981	1.06461	RAD53;CDC28	GO Biological Process AutoRIF
regulation of DNA recombination (GO:0000018)	1/21	0.0421995	0.0521567	0.174422	0.220534	-1.30103	4.1182	CDC28	GO Biological Process 2018
cell_wall_morphology	2/156	0.0406516	0.0525759	0.460166	0.577939	-0.220899	0.707476	RAD53;MCM3	Phenotype AutoRIF predicted Zscore
subcellular_morphology	2/157	0.0411237	0.0525759	0.463496	0.577939	-0.150053	0.478843	RAD53;SWI4	Phenotype AutoRIF predicted Zscore
pheromone-induced_cell_cycle_arrest	2/155	0.0401817	0.0525759	0.456826	0.577939	-0.0910844	0.292776	RAD53;MCM3	Phenotype AutoRIF predicted Zscore
cellular_protein_catabolic_process_(GO:0044257)	2/146	0.0360482	0.0530729	0.373862	0.528737	-0.196824	0.654028	RAD53;SMC3	GO Biological Process AutoRIF
cellular_protein_metabolic_process_(GO:0044267)	2/146	0.0360482	0.0530729	0.373862	0.528737	-0.19423	0.645408	RAD53;SMC3	GO Biological Process AutoRIF
positive_regulation_of_protein_sumoylation_(GO:0033235)	2/148	0.0369516	0.0530812	0.277388	0.39148	-0.520872	1.71791	MRC1;GIN4	GO Biological Process AutoRIF predicted Zscore
regulation_of_apoptotic_process_(GO:0042981)	1/18	0.0362791	0.0532094	0.154171	0.270414	-0.732509	2.42937	RAD53	GO Biological Process AutoRIF
protein_autoubiquitination_(GO:0051865)	1/18	0.0362791	0.0532094	0.154171	0.270414	-0.699844	2.32104	CDC20	GO Biological Process AutoRIF
apoptotic process (GO:0006915)	1/22	0.0441651	0.0539795	0.181601	0.227001	-1.39673	4.35754	MCD1	GO Biological Process 2018
negative regulation of exit from mitosis (GO:0001100)	1/22	0.0441651	0.0539795	0.181601	0.227001	-1.30985	4.08649	PDS1	GO Biological Process 2018
homocysteine_metabolic_process_(GO:0050667)	2/150	0.0378637	0.0541765	0.282557	0.397226	-0.584586	1.91379	MCM7;MCM3	GO Biological Process AutoRIF predicted Zscore
regulation_of_pseudohyphal_growth_(GO:2000220)	2/150	0.0378637	0.0541765	0.282557	0.397226	-0.302398	0.98998	RAD53;MCM3	GO Biological Process AutoRIF predicted Zscore
regulation_of_Rho_protein_signal_transduction_(GO:0035023)	2/149	0.0374065	0.0546547	0.383365	0.538893	-0.323004	1.06136	CLN2;CDC28	GO Biological Process AutoRIF
regulation_of_secretion_by_cell_(GO:1903530)	2/149	0.0374065	0.0546547	0.383365	0.538893	-0.192912	0.633891	RAD53;CDC28	GO Biological Process AutoRIF
positive_regulation_of_cellular_protein_metabolic_process_(GO:0032270)	2/151	0.038323	0.0547255	0.285141	0.400082	-0.180702	0.589395	SWI4;IRR1	GO Biological Process AutoRIF predicted Zscore
starvation_resistance	2/156	0.0406516	0.0552059	0.546033	0.680224	0.00404973	-0.0129701	RAD53;CDC28	Phenotype AutoRIF
ATP_export_(GO:1904669)	2/152	0.0387845	0.0552755	0.287724	0.402925	-0.279276	0.907574	RAD53;MCM3	GO Biological Process AutoRIF predicted Zscore
microtubule cytoskeleton organization involved in mitosis (GO:1902850)	1/23	0.0461267	0.0554528	0.188719	0.231945	-1.45466	4.47505	CLB1	GO Biological Process 2018
positive regulation of autophagy (GO:0010508)	1/23	0.0461267	0.0554528	0.188719	0.231945	-1.25104	3.84864	PCL1	GO Biological Process 2018
regulation of DNA-dependent DNA replication initiation (GO:0030174)	1/23	0.0461267	0.0554528	0.188719	0.231945	-1.22991	3.78366	MCM5	GO Biological Process 2018
nuclear_pore_complex_assembly_(GO:0051292)	2/152	0.0387845	0.0563472	0.39281	0.545964	-0.285772	0.928685	CDC28;BUB1	GO Biological Process AutoRIF
chemical_homeostasis_(GO:0048878)	2/152	0.0387845	0.0563472	0.39281	0.545964	-0.213462	0.693694	SWI4;CDC28	GO Biological Process AutoRIF
regulation_of_transcription_from_RNA_polymerase_II_promoter_(GO:0006357)	2/152	0.0387845	0.0563472	0.39281	0.545964	-0.136031	0.442063	SWI5;SWI4	GO Biological Process AutoRIF
flocculation	2/159	0.0420741	0.0564409	0.556426	0.680224	0.0914147	-0.289631	HSL1;IRR1	Phenotype AutoRIF
filamentous_growth	2/165	0.0449748	0.0567807	0.489727	0.6032	-0.316996	0.983213	RAD53;MCM3	Phenotype AutoRIF predicted Zscore
positive_regulation_of_cell_growth_(GO:0030307)	2/153	0.0392481	0.0569134	0.395945	0.546867	-0.131683	0.426371	CDC20;CDC5	GO Biological Process AutoRIF
monocarboxylic acid catabolic process (GO:0072329)	1/24	0.0480844	0.0574922	0.195777	0.239283	-1.36872	4.1538	SWI4	GO Biological Process 2018
regulation_of_cellular_protein_metabolic_process_(GO:0032268)	2/156	0.0406516	0.0578228	0.298051	0.416581	-0.289599	0.927503	RAD53;MCM3	GO Biological Process AutoRIF predicted Zscore
organelle_fission_(GO:0048285)	2/158	0.0415979	0.058822	0.303209	0.42135	-0.346593	1.10206	RAD53;SWI4	GO Biological Process AutoRIF predicted Zscore
regulation_of_cellular_pH_(GO:0030641)	2/158	0.0415979	0.058822	0.303209	0.42135	-0.326587	1.03845	RAD53;MCM3	GO Biological Process AutoRIF predicted Zscore
protein_dephosphorylation_(GO:0006470)	2/158	0.0415979	0.058822	0.303209	0.42135	-0.25202	0.801349	RAD53;SWI4	GO Biological Process AutoRIF predicted Zscore
positive regulation of gene expression (GO:0010628)	1/25	0.0500381	0.0588684	0.202774	0.242767	-1.30164	3.89838	CDC28	GO Biological Process 2018
regulation of macromolecule metabolic process (GO:0060255)	1/25	0.0500381	0.0588684	0.202774	0.242767	-1.25506	3.75886	CDC28	GO Biological Process 2018
protein-DNA complex assembly (GO:0065004)	1/25	0.0500381	0.0588684	0.202774	0.242767	-1.19602	3.58204	BUB1	GO Biological Process 2018
peptidyl-serine_dephosphorylation_(GO:0070262)	2/159	0.0420741	0.059264	0.305786	0.423306	-0.292612	0.927089	RAD53;SWI4	GO Biological Process AutoRIF predicted Zscore
dephosphorylation_(GO:0016311)	2/159	0.0420741	0.059264	0.305786	0.423306	-0.199226	0.631212	RAD53;SWI4	GO Biological Process AutoRIF predicted Zscore
negative_regulation_of_intracellular_signal_transduction_(GO:1902532)	2/158	0.0415979	0.0602075	0.411517	0.558577	-0.258051	0.820526	DBF2;PHO5	GO Biological Process AutoRIF
Golgi_vesicle_budding_(GO:0048194)	2/161	0.0430329	0.0604967	0.310936	0.427981	-0.173975	0.54729	RAD53;MCM7	GO Biological Process AutoRIF predicted Zscore
regulation of GTPase activity (GO:0043087)	1/26	0.051988	0.0605151	0.209713	0.248047	-1.66799	4.93181	CDC5	GO Biological Process 2018
protein localization to organelle (GO:0033365)	1/26	0.051988	0.0605151	0.209713	0.248047	-1.18637	3.50779	CDC28	GO Biological Process 2018
pantothenate_biosynthetic_process_(GO:0015940)	1/21	0.0421995	0.0607357	0.176291	0.303001	-0.697574	2.20806	RAD53	GO Biological Process AutoRIF
pantothenate_metabolic_process_(GO:0015939)	1/21	0.0421995	0.0607357	0.176291	0.303001	-0.692029	2.19051	RAD53	GO Biological Process AutoRIF
proteasomal_ubiquitin-independent_protein_catabolic_process_(GO:0010499)	1/21	0.0421995	0.0607357	0.176291	0.303001	-0.51214	1.6211	CDC20	GO Biological Process AutoRIF
regulation_of_cell_aging_(GO:0090342)	2/162	0.0435153	0.0610564	0.313509	0.430703	-0.0809149	0.253639	RAD53;SWI4	GO Biological Process AutoRIF predicted Zscore
translation_(GO:0006412)	2/160	0.0425525	0.0611295	0.417695	0.565246	-0.129734	0.409571	RAD53;DUN1	GO Biological Process AutoRIF
exit_from_G0_(stationary_phase)	1/23	0.0461267	0.0611317	0.2419	0.39131	-0.337188	1.03731	CDC28	Phenotype AutoRIF
regulation_of_cellular_biosynthetic_process_(GO:0031326)	2/161	0.0430329	0.0617045	0.420772	0.568412	-0.290887	0.915071	RAD53;CDC28	GO Biological Process AutoRIF
regulation_of_cellular_catabolic_process_(GO:0031329)	2/162	0.0435153	0.0622803	0.423842	0.56941	-0.26017	0.815539	RAD53;CDC28	GO Biological Process AutoRIF
negative regulation of chromatin silencing (GO:0031936)	1/27	0.053934	0.0624498	0.216592	0.253459	-1.37507	4.01521	MCM5	GO Biological Process 2018
vacuolar acidification (GO:0007035)	1/28	0.055876	0.0633645	0.223413	0.255994	-1.34475	3.87909	DBF2	GO Biological Process 2018
intracellular pH reduction (GO:0051452)	1/28	0.055876	0.0633645	0.223413	0.255994	-1.31513	3.79365	DBF2	GO Biological Process 2018
positive regulation of GTPase activity (GO:0043547)	1/28	0.055876	0.0633645	0.223413	0.255994	-1.22181	3.52447	CDC5	GO Biological Process 2018
maintenance of DNA repeat elements (GO:0043570)	1/28	0.055876	0.0633645	0.223413	0.255994	-1.1587	3.34241	MRC1	GO Biological Process 2018
protein_polymerization_(GO:0051258)	2/164	0.0444863	0.0635519	0.429958	0.569823	-0.39122	1.2177	CLB2;CDC28	GO Biological Process AutoRIF
regulation of protein localization (GO:0032880)	1/29	0.0578142	0.0652263	0.230176	0.262377	-1.1329	3.22934	DBF2	GO Biological Process 2018
nuclear_polyadenylation-dependent_rRNA_catabolic_process_(GO:0071035)	2/169	0.046949	0.0656198	0.331467	0.452796	-0.613753	1.87728	HSL1;GIN4	GO Biological Process AutoRIF predicted Zscore
regulation_of_GTPase_activity_(GO:0043087)	2/169	0.046949	0.0656198	0.331467	0.452796	-0.204346	0.625032	RAD53;MCM3	GO Biological Process AutoRIF predicted Zscore
U4_snRNA_3'-end_processing_(GO:0034475)	2/170	0.0474475	0.0661888	0.334024	0.45543	-0.305539	0.931324	HSL1;GIN4	GO Biological Process AutoRIF predicted Zscore
double-strand break repair via nonhomologous end joining (GO:0006303)	1/30	0.0597485	0.0667242	0.236881	0.267251	-1.22107	3.44051	CDC28	GO Biological Process 2018
regulation of cell size (GO:0008361)	1/30	0.0597485	0.0667242	0.236881	0.267251	-1.17548	3.31206	PHO5	GO Biological Process 2018
MAPK_cascade_(GO:0000165)	2/171	0.047948	0.0667583	0.336579	0.458051	0.0116136	-0.0352779	RAD53;MCM3	GO Biological Process AutoRIF predicted Zscore
protein_activity	2/182	0.0535799	0.0668095	0.542932	0.645131	-0.0315319	0.0922807	SWI4;IRR1	Phenotype AutoRIF predicted Zscore
tRNA_transcription_(GO:0009304)	2/170	0.0474475	0.0676566	0.44811	0.58982	-0.129597	0.395029	RAD53;CDC28	GO Biological Process AutoRIF
methionine_biosynthetic_process_(GO:0009086)	2/173	0.0489547	0.0680292	0.34168	0.464121	-0.589275	1.77776	MCM7;MCM3	GO Biological Process AutoRIF predicted Zscore
removal_of_nonhomologous_ends_(GO:0000735)	1/24	0.0480844	0.068438	0.197847	0.334084	-0.506188	1.53618	CDC45	GO Biological Process AutoRIF
positive regulation of hydrolase activity (GO:0051345)	1/31	0.0616789	0.0685321	0.24353	0.27335	-1.59399	4.44057	CDC5	GO Biological Process 2018
methionine_metabolic_process_(GO:0006555)	2/174	0.049461	0.0686011	0.344227	0.466705	-0.6242	1.8767	MCM7;MCM3	GO Biological Process AutoRIF predicted Zscore
cell_wall_glycoprotein_biosynthetic_process_(GO:0031506)	2/172	0.0484504	0.0688317	0.454093	0.595658	-0.255727	0.774142	SWI4;MCM1	GO Biological Process AutoRIF
regulation_of_mRNA_metabolic_process_(GO:1903311)	2/174	0.049461	0.0698807	0.460041	0.600392	-0.476759	1.43341	YOX1;CDC28	GO Biological Process AutoRIF
glucose_mediated_signaling_pathway_(GO:0010255)	2/174	0.049461	0.0698807	0.460041	0.600392	-0.254625	0.765547	SIC1;CDC28	GO Biological Process AutoRIF
glycolytic_process_(GO:0006096)	2/174	0.049461	0.0698807	0.460041	0.600392	-0.223162	0.670951	RAD53;CDC28	GO Biological Process AutoRIF
tRNA_wobble_base_modification_(GO:0002097)	1/25	0.0500381	0.0703091	0.204909	0.344498	-0.390611	1.16987	MCM5	GO Biological Process AutoRIF
regulation_of_TORC1_signaling_(GO:1903432)	2/175	0.0499693	0.0703091	0.463002	0.601199	-0.202123	0.605632	PDS1;SWI4	GO Biological Process AutoRIF
C-terminal_protein_amino_acid_modification_(GO:0018410)	2/175	0.0499693	0.0703091	0.463002	0.601199	-0.159603	0.478227	CLB2;CDC28	GO Biological Process AutoRIF
non-recombinational repair (GO:0000726)	1/32	0.0636054	0.0703175	0.250122	0.279324	-1.22844	3.38442	CDC28	GO Biological Process 2018
nucleotide_biosynthetic_process_(GO:0009165)	2/177	0.0509914	0.071388	0.468896	0.605789	-0.186811	0.555966	RAD53;MCM1	GO Biological Process AutoRIF
nucleotide_metabolic_process_(GO:0009117)	2/177	0.0509914	0.071388	0.468896	0.605789	-0.184615	0.549433	RAD53;MCM1	GO Biological Process AutoRIF
negative regulation of gene expression (GO:0010629)	1/33	0.0655281	0.0720809	0.256658	0.285175	-1.17009	3.18881	CDC28	GO Biological Process 2018
regulation_of_Cvt_pathway_(GO:2001159)	1/26	0.051988	0.0726511	0.21191	0.355492	-0.550535	1.62779	PDS1	GO Biological Process AutoRIF
recovery_from_pheromone-induced_cell_cycle_arrest	1/28	0.055876	0.073171	0.284575	0.441989	-0.271175	0.782238	CDC28	Phenotype AutoRIF
histone_H3-K79_methylation_(GO:0034729)	1/27	0.053934	0.0750979	0.218852	0.363181	-0.5539	1.61738	RAD53	GO Biological Process AutoRIF
DNA_duplex_unwinding_(GO:0032508)	1/27	0.053934	0.0750979	0.218852	0.363181	-0.425916	1.24367	CDC45	GO Biological Process AutoRIF
protein_secretion	2/200	0.0632729	0.075183	0.595235	0.660646	-0.185043	0.510775	SWI4;IRR1	Phenotype AutoRIF predicted Zscore
killer_toxin_resistance	2/200	0.0632729	0.075183	0.595235	0.660646	-0.1804	0.497957	RAD53;CLB2	Phenotype AutoRIF predicted Zscore
colony_appearance	2/200	0.0632729	0.075183	0.595235	0.660646	-0.162608	0.448846	IRR1;SMC3	Phenotype AutoRIF predicted Zscore
cell_shape	2/200	0.0632729	0.075183	0.595235	0.660646	-0.0610055	0.168393	CDC20;PDS1	Phenotype AutoRIF predicted Zscore
negative regulation of cellular macromolecule biosynthetic process (GO:2000113)	1/35	0.0693619	0.0759185	0.269563	0.29801	-1.10668	2.95308	CDC28	GO Biological Process 2018
protein_exit_from_endoplasmic_reticulum_(GO:0032527)	2/184	0.0546283	0.0759274	0.489238	0.625769	-0.119602	0.347707	CDC28;CDC5	GO Biological Process AutoRIF
regulation_of_TORC1_signaling_(GO:1903432)	2/185	0.0551553	0.0763526	0.372046	0.499682	-0.261685	0.75826	RAD53;SWI4	GO Biological Process AutoRIF predicted Zscore
positive_regulation_of_phosphorylation_(GO:0042327)	2/186	0.055684	0.0769375	0.374555	0.499682	-0.438189	1.26552	RAD53;SWI4	GO Biological Process AutoRIF predicted Zscore
pore_complex_assembly_(GO:0046931)	2/186	0.055684	0.0772553	0.494964	0.626846	-0.209079	0.603833	CDC28;BUB1	GO Biological Process AutoRIF
ribosome_disassembly_(GO:0032790)	1/28	0.055876	0.0773822	0.225733	0.372194	-0.374948	1.08158	RAD53	GO Biological Process AutoRIF
sterol_import_(GO:0035376)	2/188	0.056747	0.0782568	0.379562	0.499682	-0.339979	0.975451	MCM7;MCM3	GO Biological Process AutoRIF predicted Zscore
positive_regulation_of_cellular_biosynthetic_process_(GO:0031328)	2/189	0.0572812	0.0785446	0.38206	0.499682	-0.337355	0.964764	SWI4;IRR1	GO Biological Process AutoRIF predicted Zscore
positive_regulation_of_cellular_catabolic_process_(GO:0031331)	2/189	0.0572812	0.0785446	0.38206	0.499682	-0.33349	0.95371	SWI4;IRR1	GO Biological Process AutoRIF predicted Zscore
vesicle_fusion_(GO:0006906)	2/189	0.0572812	0.0785446	0.38206	0.499682	-0.130981	0.374578	SWI4;MCM2	GO Biological Process AutoRIF predicted Zscore
aromatic_compound_biosynthetic_process_(GO:0019438)	1/29	0.0578142	0.0796367	0.232556	0.379534	-0.492994	1.40529	CDC5	GO Biological Process AutoRIF
cellular_bud_neck_septin_ring_organization_(GO:0032186)	1/29	0.0578142	0.0796367	0.232556	0.379534	-0.426439	1.21557	GIN4	GO Biological Process AutoRIF
regulation_of_small_GTPase_mediated_signal_transduction_(GO:0051056)	1/29	0.0578142	0.0796367	0.232556	0.379534	-0.356544	1.01634	CDC28	GO Biological Process AutoRIF
actin_cytoskeleton_reorganization_(GO:0031532)	2/191	0.0583549	0.0797149	0.387045	0.499682	-0.332752	0.94542	RAD53;SWI4	GO Biological Process AutoRIF predicted Zscore
ncRNA_polyadenylation_(GO:0043629)	2/191	0.0583549	0.0797149	0.387045	0.499682	-0.159481	0.45312	MCM6;MCM2	GO Biological Process AutoRIF predicted Zscore
mRNA_export_from_nucleus_(GO:0006406)	2/200	0.0632729	0.0798076	0.40927	0.499682	-0.64109	1.7696	RAD53;CLB2	GO Biological Process AutoRIF predicted Zscore
maintenance_of_protein_localization_in_endoplasmic_reticulum_(GO:0035437)	2/200	0.0632729	0.0798076	0.40927	0.499682	-0.601785	1.66111	MCM7;CLB2	GO Biological Process AutoRIF predicted Zscore
piecemeal_microautophagy_of_nucleus_(GO:0034727)	2/200	0.0632729	0.0798076	0.40927	0.499682	-0.570323	1.57426	SWI4;IRR1	GO Biological Process AutoRIF predicted Zscore
oligosaccharide-lipid_intermediate_biosynthetic_process_(GO:0006490)	2/200	0.0632729	0.0798076	0.40927	0.499682	-0.482535	1.33194	MCM7;CLB2	GO Biological Process AutoRIF predicted Zscore
Golgi_to_plasma_membrane_transport_(GO:0006893)	2/200	0.0632729	0.0798076	0.40927	0.499682	-0.421169	1.16255	RAD53;MCM4	GO Biological Process AutoRIF predicted Zscore
organelle_membrane_fusion_(GO:0090174)	2/200	0.0632729	0.0798076	0.40927	0.499682	-0.330194	0.911434	SWI4;MCM5	GO Biological Process AutoRIF predicted Zscore
Golgi_to_plasma_membrane_protein_transport_(GO:0043001)	2/197	0.061618	0.0798076	0.4019	0.499682	-0.302438	0.842834	RAD53;MCM4	GO Biological Process AutoRIF predicted Zscore
ncRNA_transcription_(GO:0098781)	2/197	0.061618	0.0798076	0.4019	0.499682	-0.298177	0.830961	SWI4;IRR1	GO Biological Process AutoRIF predicted Zscore
proteasome_assembly_(GO:0043248)	2/200	0.0632729	0.0798076	0.40927	0.499682	-0.296551	0.818569	SWI4;IRR1	GO Biological Process AutoRIF predicted Zscore
negative_regulation_of_programmed_cell_death_(GO:0043069)	2/200	0.0632729	0.0798076	0.40927	0.499682	-0.295936	0.816871	MCM5;IRR1	GO Biological Process AutoRIF predicted Zscore
cellular_macromolecule_biosynthetic_process_(GO:0034645)	2/200	0.0632729	0.0798076	0.40927	0.499682	-0.281083	0.775874	CDC20;PDS1	GO Biological Process AutoRIF predicted Zscore
negative_regulation_of_transcription_from_RNA_polymerase_II_promoter_by_glucose_(GO:0000433)	2/199	0.0627196	0.0798076	0.406818	0.499682	-0.277972	0.769728	RAD53;MCM3	GO Biological Process AutoRIF predicted Zscore
peptidyl-asparagine_modification_(GO:0018196)	2/200	0.0632729	0.0798076	0.40927	0.499682	-0.274095	0.756585	MCM7;CLB2	GO Biological Process AutoRIF predicted Zscore
peptidyl-serine_modification_(GO:0018209)	2/200	0.0632729	0.0798076	0.40927	0.499682	-0.273342	0.754506	MCM7;CLB2	GO Biological Process AutoRIF predicted Zscore
peptidyl-methionine_modification_(GO:0018206)	2/200	0.0632729	0.0798076	0.40927	0.499682	-0.270742	0.747329	MCM7;CLB2	GO Biological Process AutoRIF predicted Zscore
cellular_macromolecule_catabolic_process_(GO:0044265)	2/200	0.0632729	0.0798076	0.40927	0.499682	-0.26328	0.726731	CDC20;PDS1	GO Biological Process AutoRIF predicted Zscore
regulation_of_vesicle_targeting,_to,_from_or_within_Golgi_(GO:0048209)	2/200	0.0632729	0.0798076	0.40927	0.499682	-0.256032	0.706724	SWI4;MCM4	GO Biological Process AutoRIF predicted Zscore
negative_regulation_of_cellular_amide_metabolic_process_(GO:0034249)	2/200	0.0632729	0.0798076	0.40927	0.499682	-0.232952	0.643017	CLB5;GIN4	GO Biological Process AutoRIF predicted Zscore
tRNA_wobble_uridine_modification_(GO:0002098)	2/200	0.0632729	0.0798076	0.40927	0.499682	-0.232243	0.641061	MCM7;MCM3	GO Biological Process AutoRIF predicted Zscore
ATP_biosynthetic_process_(GO:0006754)	2/195	0.0605234	0.0798076	0.396965	0.499682	-0.201157	0.56419	RAD53;IRR1	GO Biological Process AutoRIF predicted Zscore
siderophore_transmembrane_transport_(GO:0044718)	2/200	0.0632729	0.0798076	0.40927	0.499682	-0.187803	0.518394	RAD53;MCM3	GO Biological Process AutoRIF predicted Zscore
rRNA_base_methylation_(GO:0070475)	2/198	0.0621679	0.0798076	0.404361	0.499682	-0.175073	0.486338	MCD1;GIN4	GO Biological Process AutoRIF predicted Zscore
fungal-type_cell_wall_(1->3)-beta-D-glucan_biosynthetic_process_(GO:0071970)	2/200	0.0632729	0.0798076	0.40927	0.499682	-0.175146	0.483454	HSL1;MCM6	GO Biological Process AutoRIF predicted Zscore
formation_of_translation_preinitiation_complex_(GO:0001731)	2/200	0.0632729	0.0798076	0.40927	0.499682	-0.172421	0.475932	MCM7;CLB2	GO Biological Process AutoRIF predicted Zscore
regulation_of_transcription_from_RNA_polymerase_II_promoter_in_response_to_stress_(GO:0043618)	2/200	0.0632729	0.0798076	0.40927	0.499682	-0.168718	0.465712	RAD53;SWI4	GO Biological Process AutoRIF predicted Zscore
fungal-type_cell_wall_(1->3)-beta-D-glucan_metabolic_process_(GO:0071969)	2/200	0.0632729	0.0798076	0.40927	0.499682	-0.167912	0.463486	HSL1;MCM6	GO Biological Process AutoRIF predicted Zscore
autophagy_of_nucleus_(GO:0044804)	2/200	0.0632729	0.0798076	0.40927	0.499682	-0.163852	0.452281	SWI4;IRR1	GO Biological Process AutoRIF predicted Zscore
tRNA_export_from_nucleus_(GO:0006409)	2/200	0.0632729	0.0798076	0.40927	0.499682	-0.161404	0.445522	RAD53;CLB2	GO Biological Process AutoRIF predicted Zscore
positive_regulation_of_phosphatidylcholine_biosynthetic_process_(GO:2001247)	2/192	0.0588944	0.0798076	0.389531	0.499682	-0.15384	0.435676	CDC20;PDS1	GO Biological Process AutoRIF predicted Zscore
translation_(GO:0006412)	2/200	0.0632729	0.0798076	0.40927	0.499682	-0.135507	0.374041	MCM7;CLB2	GO Biological Process AutoRIF predicted Zscore
tRNA_aminoacylation_(GO:0043039)	2/200	0.0632729	0.0798076	0.40927	0.499682	-0.12862	0.35503	MCM7;CLB2	GO Biological Process AutoRIF predicted Zscore
negative_regulation_of_Rho_protein_signal_transduction_(GO:0035024)	2/200	0.0632729	0.0798076	0.40927	0.499682	-0.122691	0.338663	RAD53;MCM3	GO Biological Process AutoRIF predicted Zscore
vacuole_inheritance_(GO:0000011)	2/200	0.0632729	0.0798076	0.40927	0.499682	-0.120252	0.33193	SWI4;IRR1	GO Biological Process AutoRIF predicted Zscore
regulation_of_autophagy_(GO:0010506)	2/200	0.0632729	0.0798076	0.40927	0.499682	-0.101914	0.281314	SWI4;IRR1	GO Biological Process AutoRIF predicted Zscore
RNA_polyadenylation_(GO:0043631)	2/200	0.0632729	0.0798076	0.40927	0.499682	-0.0840219	0.231926	MCM6;MCM2	GO Biological Process AutoRIF predicted Zscore
protein_autoubiquitination_(GO:0051865)	2/200	0.0632729	0.0798076	0.40927	0.499682	-0.0805303	0.222288	CDC20;PDS1	GO Biological Process AutoRIF predicted Zscore
positive_regulation_of_protein_serine/threonine_kinase_activity_(GO:0071902)	2/200	0.0632729	0.0798076	0.40927	0.499682	-0.0793242	0.218958	SWI4;IRR1	GO Biological Process AutoRIF predicted Zscore
regulation_of_translational_elongation_(GO:0006448)	2/200	0.0632729	0.0798076	0.40927	0.499682	-0.064168	0.177123	RAD53;CLB2	GO Biological Process AutoRIF predicted Zscore
tRNA_aminoacylation_for_protein_translation_(GO:0006418)	2/200	0.0632729	0.0798076	0.40927	0.499682	-0.0331343	0.0914606	MCM7;CLB2	GO Biological Process AutoRIF predicted Zscore
regulation_of_macroautophagy_(GO:0016241)	2/200	0.0632729	0.0798076	0.40927	0.499682	-0.0285997	0.0789437	SWI4;IRR1	GO Biological Process AutoRIF predicted Zscore
translational_elongation_(GO:0006414)	2/200	0.0632729	0.0798076	0.40927	0.499682	0.00977165	-0.0269727	RAD53;CLB2	GO Biological Process AutoRIF predicted Zscore
vesicle-mediated_transport_to_the_plasma_membrane_(GO:0098876)	2/200	0.0632729	0.0798076	0.40927	0.499682	0.0386537	-0.106696	RAD53;MCM4	GO Biological Process AutoRIF predicted Zscore
regulation_of_small_GTPase_mediated_signal_transduction_(GO:0051056)	2/200	0.0632729	0.0798076	0.40927	0.499682	0.129667	-0.357918	CDC20;PDS1	GO Biological Process AutoRIF predicted Zscore
regulation_of_proteolysis_(GO:0030162)	2/200	0.0632729	0.0798076	0.40927	0.499682	0.190204	-0.52502	PDS1;SWI4	GO Biological Process AutoRIF predicted Zscore
recombinational repair (GO:0000725)	1/38	0.0750839	0.0817745	0.288513	0.317364	-1.17464	3.04131	PDS1	GO Biological Process 2018
regulation_of_transcription_from_RNA_polymerase_I_promoter_(GO:0006356)	1/30	0.0597485	0.0821541	0.23932	0.38471	-0.373587	1.05262	SWI5	GO Biological Process AutoRIF
position_of_spindle_pole_body	1/32	0.0636054	0.0823129	0.31702	0.484336	-0.152827	0.421048	CDC5	Phenotype AutoRIF
glucose_6-phosphate_metabolic_process_(GO:0051156)	2/194	0.0599786	0.0823236	0.517481	0.644758	-0.233264	0.656349	CDC28;FAR1	GO Biological Process AutoRIF
regulation_of_telomerase_activity_(GO:0051972)	1/33	0.0655281	0.0825084	0.210398	0.31151	-0.825036	2.24845	BUB1	GO Biological Process AutoRIF predicted Zscore
metal_resistance	1/37	0.0731804	0.0859444	0.311886	0.437	-0.255605	0.668364	MCM7	Phenotype AutoRIF predicted Zscore
culture_appearance	1/34	0.0674469	0.0862693	0.3327	0.490758	-0.178801	0.482121	PHO5	Phenotype AutoRIF
dephosphorylation_of_RNA_polymerase_II_C-terminal_domain_(GO:0070940)	1/32	0.0636054	0.0871462	0.252673	0.402812	-0.418049	1.15175	CLB2	GO Biological Process AutoRIF
regulation_of_mRNA_splicing,_via_spliceosome_(GO:0048024)	1/35	0.0693619	0.0871841	0.221332	0.32504	-0.389063	1.03818	BUB1	GO Biological Process AutoRIF predicted Zscore
anatomical structure homeostasis (GO:0060249)	1/41	0.0807716	0.0875357	0.306982	0.336001	-1.18377	2.97852	MRC1	GO Biological Process 2018
telomere organization (GO:0032200)	1/42	0.0826598	0.0887081	0.313034	0.339249	-1.08024	2.69306	MRC1	GO Biological Process 2018
DNA replication (GO:0006260)	1/42	0.0826598	0.0887081	0.313034	0.339249	-1.03209	2.57302	MRC1	GO Biological Process 2018
cellular_lipid_catabolic_process_(GO:0044242)	1/33	0.0655281	0.0894621	0.259264	0.409925	-0.419199	1.14243	CDC28	GO Biological Process AutoRIF
regulation_of_microtubule_polymerization_(GO:0031113)	1/33	0.0655281	0.0894621	0.259264	0.409925	-0.210112	0.572614	CDC28	GO Biological Process AutoRIF
phosphate-containing compound metabolic process (GO:0006796)	1/43	0.0845443	0.0898539	0.319035	0.342379	-1.36675	3.37652	PHO5	GO Biological Process 2018
positive regulation of transcription from RNA polymerase II promoter in response to stress (GO:0036003)	1/43	0.0845443	0.0898539	0.319035	0.342379	-0.972632	2.40287	SWI4	GO Biological Process 2018
regulation_of_cellular_protein_metabolic_process_(GO:0032268)	2/205	0.0660645	0.0900348	0.54739	0.677638	-0.186267	0.506111	CLB1;CDC28	GO Biological Process AutoRIF
cellular_response_to_glucose_starvation_(GO:0042149)	2/207	0.0671927	0.0914105	0.552694	0.683105	-0.190308	0.513868	SIC1;CDC28	GO Biological Process AutoRIF
negative_regulation_of_apoptotic_process_(GO:0043066)	1/34	0.0674469	0.0915946	0.265798	0.417579	-0.431294	1.16295	CDC28	GO Biological Process AutoRIF
gamma_ray_resistance	1/37	0.0731804	0.0925269	0.355564	0.507241	-0.190536	0.498218	PDS1	Phenotype AutoRIF
NAD_biosynthetic_process_(GO:0009435)	2/209	0.0683274	0.0926269	0.557956	0.685667	-0.101239	0.271669	RAD53;SWI4	GO Biological Process AutoRIF
NAD_metabolic_process_(GO:0019674)	2/210	0.0688971	0.0932351	0.560572	0.687325	-0.100791	0.26963	RAD53;SWI4	GO Biological Process AutoRIF
error-free_translesion_synthesis_(GO:0070987)	1/38	0.0750839	0.0942127	0.237458	0.345219	-0.852275	2.20667	BUB1	GO Biological Process AutoRIF predicted Zscore
cellular response to starvation (GO:0009267)	1/46	0.0901752	0.0953776	0.33673	0.359615	-1.04338	2.51037	PHO5	GO Biological Process 2018
spliceosomal_complex_assembly_(GO:0000245)	1/39	0.0769836	0.0962627	0.24276	0.350815	-0.532863	1.36635	BUB1	GO Biological Process AutoRIF predicted Zscore
regulation_of_telomere_maintenance_via_telomerase_(GO:0032210)	1/39	0.0769836	0.0962627	0.24276	0.350815	-0.272464	0.698643	BUB1	GO Biological Process AutoRIF predicted Zscore
ribonucleoprotein_complex_disassembly_(GO:0032988)	1/36	0.0712731	0.0962812	0.278698	0.432656	-0.182708	0.482574	CDC45	GO Biological Process AutoRIF
cytoplasmic_translational_initiation_(GO:0002183)	2/215	0.0717697	0.0966131	0.573489	0.700932	-0.182783	0.481505	MCM3;MCM2	GO Biological Process AutoRIF
regulation_of_sphingolipid_biosynthetic_process_(GO:0090153)	2/215	0.0717697	0.0966131	0.573489	0.700932	-0.0275633	0.0726098	PCL2;PCL1	GO Biological Process AutoRIF
microtubule_nucleation_(GO:0007020)	1/37	0.0731804	0.0983402	0.285065	0.441649	-0.309234	0.808594	CDC28	GO Biological Process AutoRIF
endocytosis	2/229	0.0800166	0.100021	0.752751	0.834135	0.362424	-0.915308	MOB1;CDC28	Phenotype AutoRIF
anion_transmembrane_transport_(GO:0098656)	1/38	0.0750839	0.100373	0.291376	0.44872	-0.441132	1.14216	PHO5	GO Biological Process AutoRIF
rDNA_condensation_(GO:0070550)	1/38	0.0750839	0.100373	0.291376	0.44872	-0.391786	1.01439	CDC5	GO Biological Process AutoRIF
regulation_of_antisense_RNA_transcription_(GO:0060194)	1/38	0.0750839	0.100373	0.291376	0.44872	-0.386502	1.00071	CDC28	GO Biological Process AutoRIF
spliceosomal_complex_disassembly_(GO:0000390)	1/41	0.0807716	0.100825	0.253258	0.363807	-0.367557	0.924822	BUB1	GO Biological Process AutoRIF predicted Zscore
negative_regulation_of_programmed_cell_death_(GO:0043069)	1/39	0.0769836	0.102556	0.297634	0.456026	-0.348403	0.893362	CDC28	GO Biological Process AutoRIF
positive_regulation_of_GTPase_activity_(GO:0043547)	1/39	0.0769836	0.102556	0.297634	0.456026	-0.231051	0.592451	CDC5	GO Biological Process AutoRIF
cell_death	1/43	0.0845443	0.104493	0.399023	0.548656	-0.115455	0.285229	RAD53	Phenotype AutoRIF
phospholipid_dephosphorylation_(GO:0046839)	1/40	0.0788795	0.104539	0.303837	0.458735	-0.349696	0.88817	CDC28	GO Biological Process AutoRIF
regulation_of_transcription_from_RNA_polymerase_II_promoter_by_glucose_(GO:0000430)	1/40	0.0788795	0.104539	0.303837	0.458735	-0.30113	0.76482	CLB5	GO Biological Process AutoRIF
tRNA_wobble_uridine_modification_(GO:0002098)	1/40	0.0788795	0.104539	0.303837	0.458735	-0.123997	0.314933	MCM5	GO Biological Process AutoRIF
endocytosis_(GO:0006897)	2/229	0.0800166	0.105864	0.608242	0.729512	-0.0248482	0.0627548	MOB1;CDC28	GO Biological Process AutoRIF
positive_regulation_of_protein_ubiquitination_(GO:0031398)	1/41	0.0807716	0.106315	0.309988	0.464378	-0.420255	1.05742	MCM1	GO Biological Process AutoRIF
ribose_phosphate_biosynthetic_process_(GO:0046390)	1/41	0.0807716	0.106315	0.309988	0.464378	-0.221734	0.557912	SWI4	GO Biological Process AutoRIF
ribose_phosphate_metabolic_process_(GO:0019693)	1/41	0.0807716	0.106315	0.309988	0.464378	-0.214695	0.5402	SWI4	GO Biological Process AutoRIF
cellular_modified_amino_acid_catabolic_process_(GO:0042219)	1/44	0.0864251	0.107512	0.26874	0.381505	-0.694677	1.7009	RAD53	GO Biological Process AutoRIF predicted Zscore
cellular_modified_amino_acid_biosynthetic_process_(GO:0042398)	1/44	0.0864251	0.107512	0.26874	0.381505	-0.694369	1.70015	RAD53	GO Biological Process AutoRIF predicted Zscore
positive_regulation_of_transport_(GO:0051050)	2/232	0.0818212	0.107513	0.615416	0.733545	-0.243384	0.609242	PHO5;CDC5	GO Biological Process AutoRIF
hyperosmotic_stress_resistance	1/45	0.088302	0.107925	0.412864	0.560679	-0.0802194	0.194692	HSL1	Phenotype AutoRIF
pyrimidine_deoxyribonucleotide_biosynthetic_process_(GO:0009221)	1/42	0.0826598	0.108429	0.316085	0.472593	-0.279213	0.696084	RAD53	GO Biological Process AutoRIF
interstrand_cross-link_repair_(GO:0036297)	1/45	0.088302	0.109658	0.273831	0.387214	-0.691024	1.67711	BUB1	GO Biological Process AutoRIF predicted Zscore
response_to_hydrogen_peroxide_(GO:0042542)	2/236	0.0842472	0.110324	0.62483	0.739047	-0.0766858	0.189721	RAD53;MCD1	GO Biological Process AutoRIF
oxidative_stress_resistance	2/248	0.091656	0.110793	0.79163	0.837172	0.39787	-0.950794	CLB2;MCM1	Phenotype AutoRIF
positive regulation of transcription from RNA polymerase II promoter (GO:0045944)	2/270	0.105712	0.111276	0.691678	0.70124	-0.8058	1.81066	CDC28;MCM1	GO Biological Process 2018
prion_formation	2/252	0.0941675	0.112592	0.799118	0.837172	0.346385	-0.818397	CDC20;MAD2	Phenotype AutoRIF
kinetochore_organization_(GO:0051383)	1/44	0.0864251	0.112984	0.328122	0.48494	-0.209596	0.51319	BUB1	GO Biological Process AutoRIF
regulation_of_ribosomal_protein_gene_transcription_from_RNA_polymerase_II_promoter_(GO:0060962)	1/45	0.088302	0.115047	0.334062	0.489609	-0.374863	0.90979	SWI5	GO Biological Process AutoRIF
phosphorylated_carbohydrate_dephosphorylation_(GO:0046838)	1/45	0.088302	0.115047	0.334062	0.489609	-0.350616	0.850943	CDC28	GO Biological Process AutoRIF
interstrand_cross-link_repair_(GO:0036297)	1/46	0.0901752	0.117289	0.339952	0.495763	-0.21939	0.527852	DUN1	GO Biological Process AutoRIF
survival_rate_in_stationary_phase	1/52	0.101336	0.117643	0.407105	0.527149	-0.0731278	0.167413	MCM7	Phenotype AutoRIF predicted Zscore
histone_H3-K4_methylation_(GO:0051568)	1/47	0.0920447	0.119518	0.34579	0.502375	-0.360689	0.860417	RAD53	GO Biological Process AutoRIF
response_to_hexose_(GO:0009746)	2/251	0.0935377	0.121253	0.658608	0.764899	0.0247404	-0.0586197	SIC1;CLB5	GO Biological Process AutoRIF
DNA recombination (GO:0006310)	1/60	0.116009	0.121533	0.413552	0.435318	-0.965653	2.0801	PDS1	GO Biological Process 2018
axial_budding_pattern	1/53	0.103183	0.122044	0.465185	0.613139	0.0257184	-0.0584129	MAD2	Phenotype AutoRIF
nucleotide_metabolic_process_(GO:0009117)	1/52	0.101336	0.125414	0.308515	0.425457	-0.558206	1.27791	MCM3	GO Biological Process AutoRIF predicted Zscore
nucleotide_biosynthetic_process_(GO:0009165)	1/52	0.101336	0.125414	0.308515	0.425457	-0.557713	1.27678	MCM3	GO Biological Process AutoRIF predicted Zscore
protein_processing_involved_in_protein_targeting_to_mitochondrion_(GO:0006627)	1/50	0.0976305	0.126345	0.363005	0.519474	-0.224541	0.522409	CDC28	GO Biological Process AutoRIF
viability	1/57	0.110534	0.129348	0.489612	0.633616	0.284895	-0.627462	CDC28	Phenotype AutoRIF
divalent_metal_ion_transport_(GO:0070838)	1/52	0.101336	0.13092	0.374236	0.528737	-0.0220096	0.050387	CDC28	GO Biological Process AutoRIF
protein_oligomerization_(GO:0051259)	1/55	0.106866	0.132032	0.322882	0.44274	-0.539018	1.20534	RAD53	GO Biological Process AutoRIF predicted Zscore
response_to_endoplasmic_reticulum_stress_(GO:0034976)	2/266	0.103114	0.132994	0.690001	0.782475	0.0337635	-0.0767081	HSL1;SWI4	GO Biological Process AutoRIF
negative_regulation_of_glycogen_biosynthetic_process_(GO:0045719)	1/54	0.105026	0.134784	0.385273	0.538893	-0.312251	0.703671	CDC28	GO Biological Process AutoRIF
negative_regulation_of_glycogen_metabolic_process_(GO:0070874)	1/54	0.105026	0.134784	0.385273	0.538893	-0.311778	0.702607	CDC28	GO Biological Process AutoRIF
inorganic_anion_transport_(GO:0015698)	1/54	0.105026	0.134784	0.385273	0.538893	-0.171568	0.386636	PHO5	GO Biological Process AutoRIF
telomere maintenance (GO:0000723)	1/68	0.130448	0.135371	0.453477	0.47282	-1.09037	2.22084	MRC1	GO Biological Process 2018
macroautophagy (GO:0016236)	1/68	0.130448	0.135371	0.453477	0.47282	-1.00189	2.04064	BUB1	GO Biological Process 2018
regulation of gene expression (GO:0010468)	1/69	0.132237	0.136583	0.458277	0.475571	-0.989526	2.00197	CDC28	GO Biological Process 2018
calcium-mediated_signaling_(GO:0019722)	1/56	0.108702	0.139269	0.39612	0.546867	-0.349153	0.774821	SWI4	GO Biological Process AutoRIF
post-Golgi vesicle-mediated transport (GO:0006892)	1/71	0.135804	0.139611	0.467755	0.483127	-0.978502	1.95362	CDC28	GO Biological Process 2018
cellular response to heat (GO:0034605)	1/72	0.137582	0.140781	0.472433	0.485678	-0.917132	1.81917	SWI4	GO Biological Process 2018
sulfate_assimilation_(GO:0000103)	1/57	0.110534	0.141381	0.401473	0.550061	-0.0915967	0.201735	RAD53	GO Biological Process AutoRIF
cellular_alcohol_biosynthetic_process_(GO:0044108)	2/280	0.112287	0.143384	0.7172	0.801999	0.0768171	-0.167976	SIC1;SWI5	GO Biological Process AutoRIF
triglyceride_catabolic_process_(GO:0019433)	1/59	0.114188	0.144851	0.412042	0.558577	-0.227235	0.493081	CDC28	GO Biological Process AutoRIF
triglyceride_metabolic_process_(GO:0006641)	1/59	0.114188	0.144851	0.412042	0.558577	-0.224503	0.487153	CDC28	GO Biological Process AutoRIF
allantoin_catabolic_process_(GO:0000256)	1/59	0.114188	0.144851	0.412042	0.558577	-0.206499	0.448085	MCM1	GO Biological Process AutoRIF
allantoin_metabolic_process_(GO:0000255)	1/59	0.114188	0.144851	0.412042	0.558577	-0.203864	0.442366	MCM1	GO Biological Process AutoRIF
response_to_cadmium_ion_(GO:0046686)	1/61	0.117827	0.149221	0.422428	0.56941	0.0790313	-0.169012	RAD53	GO Biological Process AutoRIF
nitrogen_catabolite_activation_of_transcription_(GO:0090294)	1/62	0.119641	0.150775	0.427553	0.56941	-0.343446	0.729225	MCM1	GO Biological Process AutoRIF
cellular_amide_catabolic_process_(GO:0043605)	1/62	0.119641	0.150775	0.427553	0.56941	-0.0542567	0.115201	CDC28	GO Biological Process AutoRIF
cellular_amide_metabolic_process_(GO:0043603)	1/62	0.119641	0.150775	0.427553	0.56941	-0.0499289	0.106012	CDC28	GO Biological Process AutoRIF
positive_regulation_of_macroautophagy_(GO:0016239)	1/64	0.123258	0.151766	0.364262	0.492026	-0.659722	1.38111	SWI4	GO Biological Process AutoRIF predicted Zscore
positive_regulation_of_autophagy_(GO:0010508)	1/64	0.123258	0.151766	0.364262	0.492026	-0.655582	1.37245	SWI4	GO Biological Process AutoRIF predicted Zscore
cellular_morphology	1/69	0.132237	0.153117	0.556547	0.680224	0.254866	-0.515634	CDC28	Phenotype AutoRIF
cellular macromolecule biosynthetic process (GO:0034645)	1/80	0.151677	0.153774	0.508439	0.520263	-1.05649	1.99253	MRC1	GO Biological Process 2018
regulation of transcription from RNA polymerase II promoter (GO:0006357)	2/337	0.151589	0.153774	0.803149	0.803149	-0.895237	1.68894	CDC28;MCM1	GO Biological Process 2018
calcium_ion_transport_(GO:0006816)	1/64	0.123258	0.155079	0.437672	0.578057	-0.16535	0.346157	CDC28	GO Biological Process AutoRIF
budding_index	1/71	0.135804	0.155866	0.509602	0.618617	0.0898302	-0.17935	MCM7	Phenotype AutoRIF predicted Zscore
basic_amino_acid_transport_(GO:0015802)	1/66	0.12686	0.155937	0.373119	0.499682	-0.481674	0.994496	MCM7	GO Biological Process AutoRIF predicted Zscore
protein_secretion	1/72	0.137582	0.15602	0.571894	0.691301	0.277335	-0.550105	SMC3	Phenotype AutoRIF
growth_in_exponential_phase	2/316	0.136785	0.15602	0.890908	0.899081	0.414095	-0.82378	RAD53;CDC28	Phenotype AutoRIF
competitive_fitness	1/72	0.137582	0.156132	0.514494	0.618617	-0.00954842	0.0189397	MCM7	Phenotype AutoRIF predicted Zscore
regulation_of_sulfur_metabolic_process_(GO:0042762)	2/300	0.125747	0.157953	0.752672	0.827605	0.0787012	-0.163186	SWI5;PHO5	GO Biological Process AutoRIF
small_GTPase_mediated_signal_transduction_(GO:0007264)	1/66	0.12686	0.159092	0.447616	0.58982	-0.0178988	0.0369551	CDC28	GO Biological Process AutoRIF
transcription_from_RNA_polymerase_I_promoter_(GO:0006360)	1/67	0.128656	0.161082	0.452523	0.594612	-0.128853	0.264228	SWI5	GO Biological Process AutoRIF
silencing	1/76	0.144658	0.162371	0.591554	0.707293	0.257139	-0.49715	MCM2	Phenotype AutoRIF
positive_regulation_of_protein_ubiquitination_(GO:0031398)	1/70	0.134022	0.164461	0.390472	0.499682	-0.658633	1.32369	MCM3	GO Biological Process AutoRIF predicted Zscore
establishment_of_protein_localization_to_membrane_(GO:0090150)	1/69	0.132237	0.165296	0.462211	0.601199	-0.0225351	0.0455921	FAR1	GO Biological Process AutoRIF
actin_cytoskeleton_reorganization_(GO:0031532)	1/70	0.134022	0.167256	0.466991	0.605359	-0.0598802	0.120344	CDC28	GO Biological Process AutoRIF
fatty_acid_elongation_(GO:0030497)	1/73	0.139356	0.170428	0.40318	0.499682	-0.589092	1.16094	MCM7	GO Biological Process AutoRIF predicted Zscore
maintenance_of_protein_localization_in_organelle_(GO:0072595)	1/73	0.139356	0.170428	0.40318	0.499682	-0.574686	1.13255	RAD53	GO Biological Process AutoRIF predicted Zscore
redox_state	1/81	0.153423	0.17047	0.614894	0.719557	0.28903	-0.541803	CDC28	Phenotype AutoRIF
regulation_of_transcription_from_RNA_polymerase_II_promoter_in_response_to_stress_(GO:0043618)	1/72	0.137582	0.170592	0.476429	0.611307	-0.0988386	0.19605	SWI4	GO Biological Process AutoRIF
microtubule_polymerization_(GO:0046785)	1/72	0.137582	0.170592	0.476429	0.611307	-0.0809161	0.1605	CDC28	GO Biological Process AutoRIF
sulfur_compound_biosynthetic_process_(GO:0044272)	1/72	0.137582	0.170592	0.476429	0.611307	-0.0410247	0.081374	RAD53	GO Biological Process AutoRIF
sulfur_compound_catabolic_process_(GO:0044273)	1/72	0.137582	0.170592	0.476429	0.611307	-0.0359974	0.0714023	RAD53	GO Biological Process AutoRIF
culture_appearance	1/81	0.153423	0.172175	0.556453	0.653508	0.105747	-0.198229	MCM7	Phenotype AutoRIF predicted Zscore
cellular_response_to_amino_acid_starvation_(GO:0034198)	1/74	0.141127	0.172303	0.407359	0.499682	-0.538707	1.05484	MCM3	GO Biological Process AutoRIF predicted Zscore
protein_import_(GO:0017038)	1/76	0.144658	0.176317	0.41563	0.506593	-0.574793	1.1113	MCM7	GO Biological Process AutoRIF predicted Zscore
ATP_synthesis_coupled_proton_transport_(GO:0015986)	1/77	0.146418	0.178162	0.419724	0.510723	-0.208266	0.40014	MCM3	GO Biological Process AutoRIF predicted Zscore
carbohydrate_derivative_biosynthetic_process_(GO:1901137)	1/76	0.144658	0.178504	0.494818	0.626846	-0.184813	0.357314	CDC28	GO Biological Process AutoRIF
glutamine_family_amino_acid_catabolic_process_(GO:0009065)	1/76	0.144658	0.178504	0.494818	0.626846	-0.175582	0.339468	MCM6	GO Biological Process AutoRIF
glutamine_family_amino_acid_biosynthetic_process_(GO:0009084)	1/76	0.144658	0.178504	0.494818	0.626846	-0.174232	0.336857	MCM6	GO Biological Process AutoRIF
adhesion	1/86	0.162101	0.179914	0.578229	0.660646	0.0827385	-0.150546	MCM1	Phenotype AutoRIF predicted Zscore
glutamate_biosynthetic_process_(GO:0006537)	1/77	0.146418	0.180098	0.499316	0.630284	-0.030144	0.0579153	SMC3	GO Biological Process AutoRIF
glutamate_metabolic_process_(GO:0006536)	1/77	0.146418	0.180098	0.499316	0.630284	-0.0235934	0.0453299	SMC3	GO Biological Process AutoRIF
mRNA_5'-splice_site_recognition_(GO:0000395)	1/79	0.149927	0.181821	0.427828	0.51884	-0.494026	0.937466	SWI4	GO Biological Process AutoRIF predicted Zscore
regulation_of_cell_growth_(GO:0001558)	1/79	0.149927	0.181821	0.427828	0.51884	-0.44951	0.852993	MCM7	GO Biological Process AutoRIF predicted Zscore
transcriptional_open_complex_formation_at_RNA_polymerase_II_promoter_(GO:0001113)	1/78	0.148174	0.181968	0.503774	0.633834	0.222559	-0.424947	SWI4	GO Biological Process AutoRIF
nuclear_pore_organization_(GO:0006999)	1/80	0.151677	0.184796	0.512576	0.639682	-0.158985	0.299846	CDC28	GO Biological Process AutoRIF
endoplasmic_reticulum_inheritance_(GO:0048309)	1/80	0.151677	0.184796	0.512576	0.639682	-0.0675281	0.127358	SWI5	GO Biological Process AutoRIF
homocysteine_metabolic_process_(GO:0050667)	1/80	0.151677	0.184796	0.512576	0.639682	-0.00976251	0.0184121	CLN2	GO Biological Process AutoRIF
cell_morphogenesis_(GO:0000902)	1/80	0.151677	0.184796	0.512576	0.639682	-0.00227985	0.00429979	SMC3	GO Biological Process AutoRIF
cortical_actin_cytoskeleton_organization_(GO:0030866)	1/80	0.151677	0.184796	0.512576	0.639682	0.00892105	-0.0168251	CDC28	GO Biological Process AutoRIF
vacuole_inheritance_(GO:0000011)	1/82	0.155166	0.188748	0.521225	0.647328	0.168861	-0.314632	CDC28	GO Biological Process AutoRIF
protein_activity	1/92	0.1724	0.18964	0.661758	0.766247	0.302339	-0.531495	RAD53	Phenotype AutoRIF
isoleucine_metabolic_process_(GO:0006549)	1/83	0.156905	0.189965	0.443707	0.537197	-0.426391	0.789725	MCM7	GO Biological Process AutoRIF predicted Zscore
cellular_response_to_ethanol_(GO:0071361)	2/344	0.156595	0.190186	0.817799	0.859112	0.062173	-0.115274	RAD53;MCM1	GO Biological Process AutoRIF
steroid_biosynthetic_process_(GO:0006694)	1/86	0.162101	0.195602	0.455334	0.549436	-0.336633	0.612516	MCM7	GO Biological Process AutoRIF predicted Zscore
steroid_metabolic_process_(GO:0008202)	1/86	0.162101	0.195602	0.455334	0.549436	-0.328436	0.597601	MCM7	GO Biological Process AutoRIF predicted Zscore
acylglycerol_catabolic_process_(GO:0046464)	1/87	0.163826	0.198343	0.542198	0.672291	-0.121597	0.219963	CDC28	GO Biological Process AutoRIF
cellular_response_to_salt_stress_(GO:0071472)	2/354	0.163803	0.198343	0.830348	0.862845	0.259177	-0.468875	DBF2;MCM1	GO Biological Process AutoRIF
glutamate_biosynthetic_process_(GO:0006537)	1/88	0.165548	0.199097	0.462954	0.556775	-0.32933	0.592299	MCM7	GO Biological Process AutoRIF predicted Zscore
glutamate_metabolic_process_(GO:0006536)	1/88	0.165548	0.199097	0.462954	0.556775	-0.32525	0.584961	MCM7	GO Biological Process AutoRIF predicted Zscore
chitin_deposition	1/99	0.184259	0.200678	0.688634	0.78906	0.46295	-0.78304	CDC28	Phenotype AutoRIF
negative_regulation_of_nitrogen_compound_metabolic_process_(GO:0051172)	1/90	0.16898	0.202889	0.47047	0.564876	-0.305323	0.542856	MCM1	GO Biological Process AutoRIF predicted Zscore
ornithine_metabolic_process_(GO:0006591)	1/90	0.16898	0.204262	0.554349	0.684053	-0.17976	0.319608	MCM1	GO Biological Process AutoRIF
glycolytic_fermentation_to_ethanol_(GO:0019655)	1/91	0.170692	0.205685	0.558329	0.685667	-0.097142	0.171737	CDC28	GO Biological Process AutoRIF
amide_transport_(GO:0042886)	1/91	0.170692	0.205685	0.558329	0.685667	0.0104218	-0.0184247	CDC28	GO Biological Process AutoRIF
autophagy_of_mitochondrion_(GO:0000422)	2/365	0.171802	0.206699	0.843277	0.873921	0.126294	-0.222457	DUN1;CLB2	GO Biological Process AutoRIF
copper_ion_transport_(GO:0006825)	1/96	0.179197	0.214799	0.49241	0.59024	-0.236171	0.406042	MCM3	GO Biological Process AutoRIF predicted Zscore
lifespan	1/109	0.200914	0.216671	0.723449	0.820406	0.353317	-0.567032	RAD53	Phenotype AutoRIF
positive_regulation_of_intracellular_protein_transport_(GO:0090316)	1/99	0.184259	0.220996	0.588944	0.717543	-0.130377	0.220522	CDC5	GO Biological Process AutoRIF
cellular_response_to_misfolded_protein_(GO:0071218)	1/99	0.184259	0.220996	0.588944	0.717543	-0.0922904	0.156101	CDC28	GO Biological Process AutoRIF
metabolism_and_growth	1/113	0.207482	0.221583	0.736285	0.826443	0.302677	-0.476023	RAD53	Phenotype AutoRIF
regulation_of_mitotic_actomyosin_contractile_ring_assembly_(GO:1903499)	1/100	0.185939	0.222513	0.506543	0.606177	-0.00464844	0.00782023	MCM7	GO Biological Process AutoRIF predicted Zscore
protein_catabolic_process_(GO:0030163)	1/101	0.187617	0.223976	0.596268	0.723034	0.0173309	-0.0290007	SMC3	GO Biological Process AutoRIF
fermentation_(GO:0006113)	1/101	0.187617	0.223976	0.596268	0.723034	0.0426781	-0.0714156	CDC28	GO Biological Process AutoRIF
transcription_from_RNA_polymerase_II_promoter_(GO:0006366)	1/101	0.187617	0.223976	0.596268	0.723034	0.279477	-0.467664	SWI4	GO Biological Process AutoRIF
histone_deubiquitination_(GO:0016578)	1/101	0.187617	0.224149	0.510016	0.609326	-0.369361	0.618073	MCM1	GO Biological Process AutoRIF predicted Zscore
phosphate_ion_transport_(GO:0006817)	1/102	0.18929	0.225276	0.599882	0.725133	0.115055	-0.191507	PHO5	GO Biological Process AutoRIF
regulation_of_endocytosis_(GO:0030100)	1/102	0.18929	0.225276	0.599882	0.725133	0.180455	-0.300363	CDC28	GO Biological Process AutoRIF
cellular_calcium_ion_homeostasis_(GO:0006874)	1/103	0.190961	0.226564	0.603465	0.72718	-0.112386	0.186076	SWI4	GO Biological Process AutoRIF
protein_monoubiquitination_(GO:0006513)	1/103	0.190961	0.226564	0.603465	0.72718	-0.107244	0.177563	RAD53	GO Biological Process AutoRIF
tRNA_processing_(GO:0008033)	1/104	0.192628	0.22784	0.607016	0.729177	0.0781428	-0.128701	MCM5	GO Biological Process AutoRIF
tRNA_modification_(GO:0006400)	1/104	0.192628	0.22784	0.607016	0.729177	0.236431	-0.389401	MCM5	GO Biological Process AutoRIF
acetyl-CoA_biosynthetic_process_(GO:0006085)	1/105	0.194292	0.229104	0.610537	0.729989	0.0560806	-0.0918822	SMC3	GO Biological Process AutoRIF
acetyl-CoA_metabolic_process_(GO:0006084)	1/105	0.194292	0.229104	0.610537	0.729989	0.0578875	-0.0948425	SMC3	GO Biological Process AutoRIF
(1->6)-beta-D-glucan_biosynthetic_process_(GO:0006078)	1/104	0.192628	0.229379	0.520293	0.619559	-0.0438286	0.0721855	MCM7	GO Biological Process AutoRIF predicted Zscore
(1->6)-beta-D-glucan_metabolic_process_(GO:0006077)	1/104	0.192628	0.229379	0.520293	0.619559	-0.0423894	0.0698151	MCM7	GO Biological Process AutoRIF predicted Zscore
regulation_of_glucan_biosynthetic_process_(GO:0010962)	1/106	0.195952	0.230708	0.614026	0.733023	0.222688	-0.362955	CDC28	GO Biological Process AutoRIF
positive_regulation_of_TORC1_signaling_(GO:1904263)	1/105	0.194292	0.230981	0.523672	0.622559	-0.199466	0.326803	MCM1	GO Biological Process AutoRIF predicted Zscore
mRNA processing (GO:0006397)	1/128	0.231648	0.233774	0.679184	0.691762	-0.992225	1.45116	CDC28	GO Biological Process 2018
mitochondrial_membrane_organization_(GO:0007006)	1/108	0.199263	0.233891	0.620914	0.737814	-0.0351878	0.0567625	CLB5	GO Biological Process AutoRIF
RNA_export_from_nucleus_(GO:0006405)	1/108	0.199263	0.233891	0.620914	0.737814	0.0756187	-0.121983	RAD53	GO Biological Process AutoRIF
proton_transport_(GO:0015992)	1/107	0.197609	0.234156	0.53036	0.628447	-0.277732	0.450331	MCM7	GO Biological Process AutoRIF predicted Zscore
protein_transport_to_vacuole_involved_in_ubiquitin-dependent_protein_catabolic_process_via_the_multivesicular_body_sorting_pathway_(GO:0043328)	1/107	0.197609	0.234156	0.53036	0.628447	-0.146305	0.237228	MCM7	GO Biological Process AutoRIF predicted Zscore
vacuole_organization_(GO:0007033)	1/109	0.200914	0.235112	0.624313	0.739047	0.0803587	-0.128966	CLB5	GO Biological Process AutoRIF
regulation_of_signal_transduction_(GO:0009966)	1/109	0.200914	0.235112	0.624313	0.739047	0.103154	-0.16555	SMC3	GO Biological Process AutoRIF
iron_chelate_transport_(GO:0015688)	1/108	0.199263	0.235345	0.53367	0.630305	-0.310183	0.500365	MCM7	GO Biological Process AutoRIF predicted Zscore
regulation_of_phosphatidylcholine_biosynthetic_process_(GO:2001245)	1/108	0.199263	0.235345	0.53367	0.630305	0.129095	-0.208248	MCM7	GO Biological Process AutoRIF predicted Zscore
regulation_of_phospholipid_biosynthetic_process_(GO:0071071)	1/110	0.202561	0.236321	0.627682	0.740145	0.0759309	-0.12124	CDC28	GO Biological Process AutoRIF
regulation_of_phospholipid_metabolic_process_(GO:1903725)	1/110	0.202561	0.236321	0.627682	0.740145	0.0806687	-0.128805	CDC28	GO Biological Process AutoRIF
virulence	1/123	0.223674	0.236578	0.765888	0.834135	0.283547	-0.42463	HSL1	Phenotype AutoRIF
toxin_resistance	1/118	0.215619	0.236712	0.695061	0.763056	0.0364721	-0.0559571	MCM3	Phenotype AutoRIF predicted Zscore
DNA_topological_change_(GO:0006265)	1/110	0.202561	0.23885	0.540222	0.637005	-0.161162	0.257331	MCM7	GO Biological Process AutoRIF predicted Zscore
calcium_ion_homeostasis_(GO:0055074)	1/112	0.205845	0.239789	0.634332	0.746843	-0.0827028	0.130723	SWI4	GO Biological Process AutoRIF
regulation_of_cellular_amino_acid_metabolic_process_(GO:0006521)	1/111	0.204204	0.240397	0.543464	0.639786	0.0397864	-0.0632061	RAD53	GO Biological Process AutoRIF predicted Zscore
protein_import_(GO:0017038)	1/113	0.207482	0.241331	0.637613	0.74956	0.0263772	-0.0414837	CDC28	GO Biological Process AutoRIF
regulation_of_gene_expression_(GO:0010468)	1/114	0.209116	0.242499	0.640865	0.75109	0.0544772	-0.0852496	SWI4	GO Biological Process AutoRIF
RNA_import_into_nucleus_(GO:0006404)	1/114	0.209116	0.242499	0.640865	0.75109	0.187103	-0.292791	RAD53	GO Biological Process AutoRIF
Golgi vesicle transport (GO:0048193)	1/135	0.242678	0.243787	0.698652	0.705062	-0.959385	1.35851	CDC28	GO Biological Process 2018
inositol_phosphate_dephosphorylation_(GO:0046855)	1/113	0.207482	0.243859	0.549882	0.64629	-0.120035	0.18878	MCM1	GO Biological Process AutoRIF predicted Zscore
mRNA_cleavage_(GO:0006379)	1/116	0.212374	0.245907	0.647285	0.757462	0.0038218	-0.00592153	CDC28	GO Biological Process AutoRIF
aspartate_family_amino_acid_biosynthetic_process_(GO:0009067)	1/118	0.215619	0.248543	0.653593	0.761372	0.172166	-0.264145	CDC28	GO Biological Process AutoRIF
aspartate_family_amino_acid_metabolic_process_(GO:0009066)	1/118	0.215619	0.248543	0.653593	0.761372	0.173248	-0.265805	CDC28	GO Biological Process AutoRIF
aspartate_family_amino_acid_catabolic_process_(GO:0009068)	1/118	0.215619	0.248543	0.653593	0.761372	0.174138	-0.26717	CDC28	GO Biological Process AutoRIF
inorganic_anion_transmembrane_transport_(GO:0098661)	1/116	0.212374	0.248801	0.559345	0.655285	-0.322951	0.500383	PHO5	GO Biological Process AutoRIF predicted Zscore
beta-glucan_biosynthetic_process_(GO:0051274)	1/116	0.212374	0.248801	0.559345	0.655285	-0.00552883	0.0085664	MCM7	GO Biological Process AutoRIF predicted Zscore
neutral_amino_acid_transport_(GO:0015804)	1/119	0.217236	0.250033	0.656706	0.763842	0.207734	-0.317162	CDC28	GO Biological Process AutoRIF
vesicle_distribution	1/133	0.239543	0.25095	0.792241	0.837172	0.554006	-0.791687	BUB1	Phenotype AutoRIF
vacuolar_morphology	1/135	0.242678	0.251836	0.797153	0.837172	0.55118	-0.78048	CDC28	Phenotype AutoRIF
pyrimidine_ribonucleoside_biosynthetic_process_(GO:0046132)	1/122	0.222069	0.255214	0.665881	0.772181	-0.0316721	0.0476591	MCM5	GO Biological Process AutoRIF
trehalose_biosynthetic_process_(GO:0005992)	1/123	0.223674	0.256293	0.668886	0.773336	0.147589	-0.221024	CDC28	GO Biological Process AutoRIF
trehalose_metabolic_process_(GO:0005991)	1/123	0.223674	0.256293	0.668886	0.773336	0.151408	-0.226743	CDC28	GO Biological Process AutoRIF
auxotrophy	1/131	0.236395	0.25673	0.732996	0.796049	0.112741	-0.162601	MCM7	Phenotype AutoRIF predicted Zscore
cofactor_biosynthetic_process_(GO:0051188)	1/124	0.225275	0.257744	0.671864	0.775615	-0.00918345	0.0136873	MCM1	GO Biological Process AutoRIF
replicative_cell_aging_(GO:0001302)	1/121	0.220462	0.257858	0.574689	0.672172	0.337887	-0.510896	RAD53	GO Biological Process AutoRIF predicted Zscore
proteasome-mediated ubiquitin-dependent protein catabolic process (GO:0043161)	1/145	0.258168	0.258168	0.724478	0.727787	-0.890317	1.20562	CDC20	GO Biological Process 2018
mitochondrial_RNA_metabolic_process_(GO:0000959)	1/122	0.222069	0.25932	0.577695	0.674598	-0.0806178	0.121311	RAD53	GO Biological Process AutoRIF predicted Zscore
fermentative_metabolism	1/142	0.253554	0.260663	0.81347	0.844167	0.394239	-0.540966	CDC28	Phenotype AutoRIF
polyol_transport_(GO:0015791)	1/123	0.223674	0.260773	0.58068	0.676992	0.0137	-0.0205166	MCM1	GO Biological Process AutoRIF predicted Zscore
regulation_of_transcription_initiation_from_RNA_polymerase_II_promoter_(GO:0060260)	1/126	0.228468	0.26101	0.677743	0.78123	0.377209	-0.556896	SWI4	GO Biological Process AutoRIF
regulation_of_gluconeogenesis_(GO:0006111)	1/127	0.23006	0.26205	0.680643	0.782035	-0.0267508	0.0393081	CDC28	GO Biological Process AutoRIF
positive_regulation_of_cellular_protein_metabolic_process_(GO:0032270)	1/127	0.23006	0.26205	0.680643	0.782035	0.233163	-0.342614	CDC5	GO Biological Process AutoRIF
negative_regulation_of_transcription_from_RNA_polymerase_I_promoter_(GO:0016479)	1/124	0.225275	0.262217	0.583644	0.679354	-0.299915	0.447003	PCL9	GO Biological Process AutoRIF predicted Zscore
RNA_processing_(GO:0006396)	1/128	0.231648	0.262694	0.683519	0.782035	0.118679	-0.173572	MCM5	GO Biological Process AutoRIF
secondary_alcohol_biosynthetic_process_(GO:1902653)	1/128	0.231648	0.262694	0.683519	0.782035	0.245431	-0.358952	MCM1	GO Biological Process AutoRIF
vesicle_organization_(GO:0016050)	1/128	0.231648	0.262694	0.683519	0.782035	0.336946	-0.492796	CDC28	GO Biological Process AutoRIF
endoplasmic_reticulum_distribution	1/137	0.245801	0.264106	0.748929	0.8047	0.314563	-0.441405	MCM7	Phenotype AutoRIF predicted Zscore
endoplasmic_reticulum_membrane_organization_(GO:0090158)	1/130	0.234816	0.264339	0.689193	0.782475	0.0903783	-0.130954	CLB5	GO Biological Process AutoRIF
membrane_fusion_(GO:0061025)	1/130	0.234816	0.264339	0.689193	0.782475	0.181194	-0.262542	CLB2	GO Biological Process AutoRIF
positive_regulation_of_catabolic_process_(GO:0009896)	1/130	0.234816	0.264339	0.689193	0.782475	0.239061	-0.346388	CDC5	GO Biological Process AutoRIF
positive_regulation_of_cellular_biosynthetic_process_(GO:0031328)	1/130	0.234816	0.264339	0.689193	0.782475	0.261266	-0.378563	CDC5	GO Biological Process AutoRIF
positive_regulation_of_cellular_catabolic_process_(GO:0031331)	1/130	0.234816	0.264339	0.689193	0.782475	0.265216	-0.384286	CDC5	GO Biological Process AutoRIF
plasma_membrane_morphology	1/146	0.2597	0.264509	0.822211	0.845264	0.496062	-0.668804	CDC20	Phenotype AutoRIF
regulation_of_phosphoprotein_phosphatase_activity_(GO:0043666)	1/126	0.228468	0.265507	0.589512	0.685083	0.17745	-0.26198	RAD53	GO Biological Process AutoRIF predicted Zscore
regulation_of_exocytosis_(GO:0017157)	1/127	0.23006	0.266928	0.592416	0.687355	-0.150014	0.220433	RAD53	GO Biological Process AutoRIF predicted Zscore
mitochondrial_protein_processing_(GO:0034982)	1/132	0.23797	0.267109	0.694769	0.785568	0.00328407	-0.00471465	CLB2	GO Biological Process AutoRIF
nucleosome_organization_(GO:0034728)	1/132	0.23797	0.267109	0.694769	0.785568	0.0950117	-0.1364	MCM1	GO Biological Process AutoRIF
retrograde_transport,_endosome_to_Golgi_(GO:0042147)	1/129	0.233234	0.270178	0.598164	0.692882	0.14092	-0.205139	SWI4	GO Biological Process AutoRIF predicted Zscore
pre-mRNA_cleavage_required_for_polyadenylation_(GO:0098789)	1/130	0.234816	0.270711	0.601008	0.692882	-0.0343741	0.0498064	MCM6	GO Biological Process AutoRIF predicted Zscore
small_nucleolar_ribonucleoprotein_complex_assembly_(GO:0000491)	1/130	0.234816	0.270711	0.601008	0.692882	-0.0291522	0.0422403	GIN4	GO Biological Process AutoRIF predicted Zscore
negative_regulation_of_hydrolase_activity_(GO:0051346)	1/130	0.234816	0.270711	0.601008	0.692882	-0.0128885	0.0186748	RAD53	GO Biological Process AutoRIF predicted Zscore
transcription_from_RNA_polymerase_III_promoter_(GO:0006383)	1/135	0.242678	0.271998	0.70295	0.793653	0.52841	-0.748238	CDC28	GO Biological Process AutoRIF
negative_regulation_of_cell_aging_(GO:0090344)	1/131	0.236395	0.272098	0.603833	0.695032	0.202956	-0.292714	SWI4	GO Biological Process AutoRIF predicted Zscore
Golgi_organization_(GO:0007030)	1/136	0.244241	0.273352	0.705629	0.795511	0.236009	-0.332678	CDC28	GO Biological Process AutoRIF
mRNA_stabilization_(GO:0048255)	1/132	0.23797	0.273477	0.606638	0.697153	-0.153798	0.220794	RAD53	GO Biological Process AutoRIF predicted Zscore
sulfate_transport_(GO:0008272)	1/138	0.247358	0.276438	0.710916	0.800301	0.338448	-0.472784	PHO5	GO Biological Process AutoRIF
RNA_metabolic_process_(GO:0016070)	1/139	0.248912	0.277771	0.713525	0.801999	0.135906	-0.188998	RAD53	GO Biological Process AutoRIF
regulation_of_transcription_from_RNA_polymerase_II_promoter_by_glucose_(GO:0000430)	1/135	0.242678	0.278446	0.614939	0.705572	0.207967	-0.294485	RAD53	GO Biological Process AutoRIF predicted Zscore
Golgi_vesicle_budding_(GO:0048194)	1/140	0.250462	0.278694	0.716111	0.801999	0.226177	-0.313131	CDC28	GO Biological Process AutoRIF
positive_regulation_of_protein_metabolic_process_(GO:0051247)	1/140	0.250462	0.278694	0.716111	0.801999	0.30485	-0.422048	CDC5	GO Biological Process AutoRIF
RNA_biosynthetic_process_(GO:0032774)	1/141	0.25201	0.279607	0.718674	0.801999	0.118347	-0.163116	RAD53	GO Biological Process AutoRIF
positive_regulation_of_protein_catabolic_process_(GO:0045732)	1/141	0.25201	0.279607	0.718674	0.801999	0.292694	-0.403417	CDC5	GO Biological Process AutoRIF
negative_regulation_of_cytoskeleton_organization_(GO:0051494)	1/136	0.244241	0.279796	0.617667	0.707581	-0.152308	0.214693	RAD53	GO Biological Process AutoRIF predicted Zscore
mRNA_metabolic_process_(GO:0016071)	1/142	0.253554	0.280916	0.721215	0.803669	0.233834	-0.320862	CDC28	GO Biological Process AutoRIF
positive_regulation_of_DNA_metabolic_process_(GO:0051054)	1/137	0.245801	0.281138	0.620377	0.70928	-0.125273	0.175787	SWI4	GO Biological Process AutoRIF predicted Zscore
alpha-amino_acid_biosynthetic_process_(GO:1901607)	1/138	0.247358	0.281584	0.623069	0.70928	-0.157245	0.219658	MCM7	GO Biological Process AutoRIF predicted Zscore
alpha-amino_acid_catabolic_process_(GO:1901606)	1/138	0.247358	0.281584	0.623069	0.70928	-0.154595	0.215956	MCM7	GO Biological Process AutoRIF predicted Zscore
alpha-amino_acid_metabolic_process_(GO:1901605)	1/138	0.247358	0.281584	0.623069	0.70928	-0.150003	0.209542	MCM7	GO Biological Process AutoRIF predicted Zscore
vacuolar_acidification_(GO:0007035)	1/139	0.248912	0.282908	0.625742	0.711204	0.0765207	-0.106414	RAD53	GO Biological Process AutoRIF predicted Zscore
hexose_transmembrane_transport_(GO:0035428)	1/140	0.250462	0.283779	0.628396	0.711985	0.0744355	-0.103052	MCM7	GO Biological Process AutoRIF predicted Zscore
snRNA_modification_(GO:0040031)	1/140	0.250462	0.283779	0.628396	0.711985	0.299109	-0.4141	MCD1	GO Biological Process AutoRIF predicted Zscore
phosphatidylinositol_metabolic_process_(GO:0046488)	1/141	0.25201	0.284641	0.631032	0.712741	-0.240876	0.331997	SWI4	GO Biological Process AutoRIF predicted Zscore
phosphatidylinositol_biosynthetic_process_(GO:0006661)	1/141	0.25201	0.284641	0.631032	0.712741	-0.239034	0.329457	SWI4	GO Biological Process AutoRIF predicted Zscore
osmotic_stress_resistance	1/161	0.282311	0.284901	0.851574	0.867344	0.619884	-0.783996	HSL1	Phenotype AutoRIF
negative_regulation_of_transcription_by_glucose_(GO:0045014)	1/147	0.261229	0.289003	0.733586	0.816274	0.212012	-0.284596	SWI4	GO Biological Process AutoRIF
protein_transport	1/154	0.271844	0.289013	0.789251	0.839098	0.328135	-0.427404	RAD53	Phenotype AutoRIF predicted Zscore
positive_regulation_of_cell_growth_(GO:0030307)	1/144	0.256633	0.289412	0.638831	0.720427	0.0113565	-0.015446	SWI4	GO Biological Process AutoRIF predicted Zscore
homoserine_metabolic_process_(GO:0009092)	1/146	0.2597	0.291057	0.643942	0.721693	-0.180033	0.242725	MCM7	GO Biological Process AutoRIF predicted Zscore
negative_regulation_of_cellular_biosynthetic_process_(GO:0031327)	1/146	0.2597	0.291057	0.643942	0.721693	0.00959474	-0.0129359	SWI4	GO Biological Process AutoRIF predicted Zscore
negative_regulation_of_cellular_protein_metabolic_process_(GO:0032269)	1/146	0.2597	0.291057	0.643942	0.721693	0.0165535	-0.0223179	SWI4	GO Biological Process AutoRIF predicted Zscore
negative_regulation_of_cellular_catabolic_process_(GO:0031330)	1/146	0.2597	0.291057	0.643942	0.721693	0.0185069	-0.0249516	SWI4	GO Biological Process AutoRIF predicted Zscore
snRNA_pseudouridine_synthesis_(GO:0031120)	1/147	0.261229	0.292318	0.64647	0.723407	-0.124966	0.16775	GIN4	GO Biological Process AutoRIF predicted Zscore
negative_regulation_of_homeostatic_process_(GO:0032845)	1/148	0.262754	0.293119	0.648982	0.723979	-0.0294684	0.0393856	SWI4	GO Biological Process AutoRIF predicted Zscore
regulation_of_intracellular_signal_transduction_(GO:1902531)	1/148	0.262754	0.293119	0.648982	0.723979	0.146385	-0.195649	SWI4	GO Biological Process AutoRIF predicted Zscore
cell_size	1/159	0.279335	0.293884	0.799869	0.841529	0.166872	-0.212819	MCM3	Phenotype AutoRIF predicted Zscore
nuclear_mRNA_surveillance_of_mRNA_3'-end_processing_(GO:0071031)	1/149	0.264277	0.293912	0.651475	0.724529	-0.253978	0.337984	GIN4	GO Biological Process AutoRIF predicted Zscore
negative_regulation_of_Ras_protein_signal_transduction_(GO:0046580)	1/149	0.264277	0.293912	0.651475	0.724529	0.124613	-0.165829	MCM3	GO Biological Process AutoRIF predicted Zscore
metal_ion_transport_(GO:0030001)	1/151	0.267313	0.294887	0.743096	0.824472	0.0641271	-0.0846051	CDC28	GO Biological Process AutoRIF
cellular_glucose_homeostasis_(GO:0001678)	1/151	0.267313	0.294887	0.743096	0.824472	0.208333	-0.274861	CLB5	GO Biological Process AutoRIF
vacuolar_acidification_(GO:0007035)	1/152	0.268827	0.296132	0.745421	0.825862	0.275025	-0.361298	DBF2	GO Biological Process AutoRIF
invasive_filamentous_growth_(GO:0036267)	1/152	0.268827	0.298513	0.658854	0.731611	0.060604	-0.0796148	RAD53	GO Biological Process AutoRIF predicted Zscore
positive_regulation_of_glucose_metabolic_process_(GO:0010907)	1/154	0.271844	0.298602	0.75001	0.827605	0.110594	-0.144051	CDC28	GO Biological Process AutoRIF
regulation_of_exocytosis_(GO:0017157)	1/154	0.271844	0.298602	0.75001	0.827605	0.437817	-0.570268	PDS1	GO Biological Process AutoRIF
endoplasmic_reticulum_organization_(GO:0007029)	1/155	0.273349	0.2994	0.752274	0.827605	0.205669	-0.266755	CLB5	GO Biological Process AutoRIF
response_to_metal_ion_(GO:0010038)	1/155	0.273349	0.2994	0.752274	0.827605	0.415647	-0.539098	SWI4	GO Biological Process AutoRIF
regulation_of_cellular_pH_(GO:0030641)	1/156	0.27485	0.300191	0.754518	0.827605	0.0712899	-0.0920731	CDC28	GO Biological Process AutoRIF
primary_alcohol_metabolic_process_(GO:0034308)	1/156	0.27485	0.300191	0.754518	0.827605	0.34379	-0.444016	CDC28	GO Biological Process AutoRIF
protein_transport_(GO:0015031)	1/154	0.271844	0.300481	0.663689	0.733604	-0.0728143	0.0948425	RAD53	GO Biological Process AutoRIF predicted Zscore
snoRNA_metabolic_process_(GO:0016074)	1/154	0.271844	0.300481	0.663689	0.733604	0.155901	-0.203065	GIN4	GO Biological Process AutoRIF predicted Zscore
snoRNA_catabolic_process_(GO:0016077)	1/154	0.271844	0.300481	0.663689	0.733604	0.166289	-0.216596	GIN4	GO Biological Process AutoRIF predicted Zscore
fatty_acid_beta-oxidation_(GO:0006635)	1/157	0.276348	0.300973	0.756742	0.827687	0.217085	-0.279192	CDC28	GO Biological Process AutoRIF
mannoprotein_biosynthetic_process_(GO:0006057)	1/157	0.276348	0.300973	0.756742	0.827687	0.36929	-0.474942	PHO5	GO Biological Process AutoRIF
positive_regulation_of_transcription_from_RNA_polymerase_II_promoter_(GO:0045944)	1/155	0.273349	0.301683	0.666081	0.735126	-0.0796679	0.10333	RAD53	GO Biological Process AutoRIF predicted Zscore
glycerol_metabolic_process_(GO:0006071)	1/158	0.277843	0.302174	0.758947	0.828921	0.202986	-0.259964	HSL1	GO Biological Process AutoRIF
oligosaccharide_catabolic_process_(GO:0009313)	1/159	0.279335	0.302941	0.761132	0.828956	0.324066	-0.413295	CDC28	GO Biological Process AutoRIF
oligosaccharide_metabolic_process_(GO:0009311)	1/159	0.279335	0.302941	0.761132	0.828956	0.327052	-0.417103	CDC28	GO Biological Process AutoRIF
regulation_of_intracellular_transport_(GO:0032386)	1/161	0.282311	0.305738	0.765444	0.832475	0.227687	-0.287967	CDC28	GO Biological Process AutoRIF
X_ray_resistance	1/171	0.297009	0.309257	0.823291	0.857242	0.457969	-0.555971	KCC4	Phenotype AutoRIF predicted Zscore
snRNA_3'-end_processing_(GO:0034472)	1/161	0.282311	0.311101	0.680091	0.749446	0.107489	-0.135946	GIN4	GO Biological Process AutoRIF predicted Zscore
cellular_response_to_fatty_acid_(GO:0071398)	1/165	0.288226	0.311705	0.773842	0.836249	0.130653	-0.162534	CDC28	GO Biological Process AutoRIF
response_to_cadmium_ion_(GO:0046686)	1/162	0.283794	0.311786	0.68237	0.749675	0.232199	-0.292456	MCM3	GO Biological Process AutoRIF predicted Zscore
termination_of_RNA_polymerase_II_transcription,_poly(A)-coupled_(GO:0030846)	1/162	0.283794	0.311786	0.68237	0.749675	0.299844	-0.377655	BUB1	GO Biological Process AutoRIF predicted Zscore
isoleucine_metabolic_process_(GO:0006549)	1/166	0.289697	0.311818	0.775896	0.836249	0.194076	-0.240445	CDC20	GO Biological Process AutoRIF
aerobic_respiration_(GO:0009060)	1/166	0.289697	0.311818	0.775896	0.836249	0.235592	-0.291879	CDC28	GO Biological Process AutoRIF
protein_targeting_(GO:0006605)	1/166	0.289697	0.311818	0.775896	0.836249	0.282239	-0.349672	CLB1	GO Biological Process AutoRIF
protein_import_into_mitochondrial_outer_membrane_(GO:0045040)	1/167	0.291165	0.311818	0.777931	0.836249	0.310581	-0.383215	PHO5	GO Biological Process AutoRIF
disaccharide_metabolic_process_(GO:0005984)	1/167	0.291165	0.311818	0.777931	0.836249	0.356363	-0.439704	CDC28	GO Biological Process AutoRIF
disaccharide_catabolic_process_(GO:0046352)	1/167	0.291165	0.311818	0.777931	0.836249	0.358838	-0.442758	CDC28	GO Biological Process AutoRIF
disaccharide_biosynthetic_process_(GO:0046351)	1/167	0.291165	0.311818	0.777931	0.836249	0.36201	-0.446672	CDC28	GO Biological Process AutoRIF
late_endosome_to_vacuole_transport_(GO:0045324)	1/163	0.285274	0.312464	0.684633	0.749885	0.0389246	-0.0488233	SWI4	GO Biological Process AutoRIF predicted Zscore
actin_nucleation_(GO:0045010)	1/163	0.285274	0.312464	0.684633	0.749885	0.276701	-0.347068	MCM1	GO Biological Process AutoRIF predicted Zscore
organelle_disassembly_(GO:1903008)	1/169	0.294093	0.313211	0.781947	0.836249	0.0307437	-0.037626	CDC5	GO Biological Process AutoRIF
basic_amino_acid_transport_(GO:0015802)	1/169	0.294093	0.313211	0.781947	0.836249	0.231638	-0.283492	SWI5	GO Biological Process AutoRIF
regulation_of_protein_metabolic_process_(GO:0051246)	1/169	0.294093	0.313211	0.781947	0.836249	0.241429	-0.295476	CDC28	GO Biological Process AutoRIF
response_to_reactive_oxygen_species_(GO:0000302)	1/169	0.294093	0.313211	0.781947	0.836249	0.277922	-0.340137	RAD53	GO Biological Process AutoRIF
ionic_stress_resistance	1/176	0.304248	0.313561	0.83225	0.857727	0.341316	-0.406137	MCM7	Phenotype AutoRIF predicted Zscore
regulation_of_dephosphorylation_(GO:0035303)	1/164	0.286752	0.313607	0.68688	0.75121	0.19921	-0.248842	RAD53	GO Biological Process AutoRIF predicted Zscore
regulation_of_protein_catabolic_process_(GO:0042176)	1/170	0.295553	0.314331	0.783928	0.837205	0.27427	-0.33431	CDC28	GO Biological Process AutoRIF
ncRNA_processing_(GO:0034470)	1/166	0.289697	0.316351	0.691328	0.754934	0.101268	-0.125463	MCM6	GO Biological Process AutoRIF predicted Zscore
regulation_of_protein_dephosphorylation_(GO:0035304)	1/167	0.291165	0.317475	0.693529	0.756197	0.235888	-0.291054	RAD53	GO Biological Process AutoRIF predicted Zscore
regulation_of_translational_elongation_(GO:0006448)	1/174	0.301361	0.319625	0.79168	0.843145	0.343927	-0.412522	CDC28	GO Biological Process AutoRIF
positive_regulation_of_translation_(GO:0045727)	1/174	0.301361	0.319625	0.79168	0.843145	0.379672	-0.455396	CLB2	GO Biological Process AutoRIF
nuclear-transcribed_mRNA_catabolic_process,_nonsense-mediated_decay_(GO:0000184)	1/177	0.305687	0.323322	0.797315	0.846803	0.0833546	-0.0987915	RAD53	GO Biological Process AutoRIF
protein_import_into_mitochondrial_inner_membrane_(GO:0045039)	1/177	0.305687	0.323322	0.797315	0.846803	0.27161	-0.321911	PHO5	GO Biological Process AutoRIF
regulation_of_transcription_regulatory_region_DNA_binding_(GO:2000677)	1/171	0.297009	0.32336	0.702181	0.758182	0.344309	-0.417989	SWI4	GO Biological Process AutoRIF predicted Zscore
cellular_respiration_(GO:0045333)	1/178	0.307123	0.324396	0.79916	0.847594	0.297528	-0.351234	CDC28	GO Biological Process AutoRIF
7-methylguanosine_mRNA_capping_(GO:0006370)	1/173	0.299913	0.325543	0.706417	0.758182	0.118819	-0.143089	RAD53	GO Biological Process AutoRIF predicted Zscore
7-methylguanosine_RNA_capping_(GO:0009452)	1/173	0.299913	0.325543	0.706417	0.758182	0.122835	-0.147926	RAD53	GO Biological Process AutoRIF predicted Zscore
cellular_response_to_reactive_oxygen_species_(GO:0034614)	1/181	0.311413	0.328477	0.804597	0.852187	0.176215	-0.205579	RAD53	GO Biological Process AutoRIF
macromolecule_catabolic_process_(GO:0009057)	1/176	0.304248	0.32926	0.712662	0.758182	0.0848213	-0.10093	CDC20	GO Biological Process AutoRIF predicted Zscore
macromolecule_biosynthetic_process_(GO:0009059)	1/176	0.304248	0.32926	0.712662	0.758182	0.0852341	-0.101421	CDC20	GO Biological Process AutoRIF predicted Zscore
pentose-phosphate_shunt_(GO:0006098)	1/182	0.312838	0.329528	0.806378	0.852899	0.231242	-0.268719	RAD53	GO Biological Process AutoRIF
receptor_recycling_(GO:0001881)	1/177	0.305687	0.330324	0.714715	0.758182	0.0992498	-0.11763	RAD53	GO Biological Process AutoRIF predicted Zscore
utilization_of_iron_source	1/190	0.324131	0.330679	0.855065	0.869497	0.475373	-0.535559	MCM7	Phenotype AutoRIF predicted Zscore
plasma_membrane_organization_(GO:0007009)	1/178	0.307123	0.330888	0.716754	0.758182	-0.181807	0.214625	SWI4	GO Biological Process AutoRIF predicted Zscore
vacuole_organization_(GO:0007033)	1/178	0.307123	0.330888	0.716754	0.758182	0.00557784	-0.00658468	SWI4	GO Biological Process AutoRIF predicted Zscore
transcription_initiation_from_RNA_polymerase_II_promoter_(GO:0006367)	1/184	0.315678	0.332066	0.809891	0.85544	0.681592	-0.785897	SWI4	GO Biological Process AutoRIF
azole_transport_(GO:0045117)	1/185	0.317094	0.3331	0.811624	0.856097	0.480323	-0.551679	HSL1	GO Biological Process AutoRIF
snoRNA_3'-end_processing_(GO:0031126)	1/182	0.312838	0.336545	0.724767	0.758182	-0.157913	0.183506	GIN4	GO Biological Process AutoRIF predicted Zscore
protein_localization_to_endosome_(GO:0036010)	1/200	0.337993	0.337993	0.758182	0.758182	-0.301162	0.32668	SWI4	GO Biological Process AutoRIF predicted Zscore
U1_snRNA_3'-end_processing_(GO:0034473)	1/200	0.337993	0.337993	0.758182	0.758182	-0.183727	0.199295	GIN4	GO Biological Process AutoRIF predicted Zscore
phosphatidylinositol_phosphorylation_(GO:0046854)	1/200	0.337993	0.337993	0.758182	0.758182	-0.128748	0.139657	SWI4	GO Biological Process AutoRIF predicted Zscore
protein_localization_to_Golgi_apparatus_(GO:0034067)	1/191	0.32553	0.337993	0.742	0.758182	-0.108822	0.122132	RAD53	GO Biological Process AutoRIF predicted Zscore
protein_O-linked_mannosylation_(GO:0035269)	1/200	0.337993	0.337993	0.758182	0.758182	-0.111701	0.121166	MCM7	GO Biological Process AutoRIF predicted Zscore
ncRNA_3'-end_processing_(GO:0043628)	1/191	0.32553	0.337993	0.742	0.758182	-0.0795877	0.0893214	GIN4	GO Biological Process AutoRIF predicted Zscore
endosome_organization_(GO:0007032)	1/200	0.337993	0.337993	0.758182	0.758182	-0.0679088	0.0736629	SWI4	GO Biological Process AutoRIF predicted Zscore
nuclear_RNA_surveillance_(GO:0071027)	1/188	0.321325	0.337993	0.736376	0.758182	-0.0210995	0.0239543	MCM6	GO Biological Process AutoRIF predicted Zscore
cilium_organization_(GO:0044782)	1/200	0.337993	0.337993	0.758182	0.758182	-0.0207421	0.0224996	MAD2	GO Biological Process AutoRIF predicted Zscore
DNA_replication-dependent_nucleosome_assembly_(GO:0006335)	1/200	0.337993	0.337993	0.758182	0.758182	-0.01917	0.0207943	GIN4	GO Biological Process AutoRIF predicted Zscore
organelle_fusion_(GO:0048284)	1/200	0.337993	0.337993	0.758182	0.758182	0.00284778	-0.00308908	SWI4	GO Biological Process AutoRIF predicted Zscore
positive_regulation_of_actin_filament_polymerization_(GO:0030838)	1/200	0.337993	0.337993	0.758182	0.758182	0.0103815	-0.0112611	MCM1	GO Biological Process AutoRIF predicted Zscore
protein_localization_to_endoplasmic_reticulum_(GO:0070972)	1/193	0.328319	0.337993	0.745685	0.758182	0.0167109	-0.0186121	MCM7	GO Biological Process AutoRIF predicted Zscore
negative_regulation_of_actin_filament_polymerization_(GO:0030837)	1/194	0.329709	0.337993	0.747508	0.758182	0.0262046	-0.0290751	MCM1	GO Biological Process AutoRIF predicted Zscore
positive_regulation_of_protein_polymerization_(GO:0032273)	1/200	0.337993	0.337993	0.758182	0.758182	0.0296354	-0.0321464	MCM1	GO Biological Process AutoRIF predicted Zscore
cellular_lipid_catabolic_process_(GO:0044242)	1/200	0.337993	0.337993	0.758182	0.758182	0.0364855	-0.0395769	CDC20	GO Biological Process AutoRIF predicted Zscore
Golgi_to_endosome_transport_(GO:0006895)	1/200	0.337993	0.337993	0.758182	0.758182	0.0515944	-0.055966	SWI4	GO Biological Process AutoRIF predicted Zscore
cotranslational_protein_targeting_to_membrane_(GO:0006613)	1/200	0.337993	0.337993	0.758182	0.758182	0.0682397	-0.0740217	SPO12	GO Biological Process AutoRIF predicted Zscore
phospholipid_transport_(GO:0015914)	1/200	0.337993	0.337993	0.758182	0.758182	0.0756062	-0.0820124	MCM4	GO Biological Process AutoRIF predicted Zscore
negative_regulation_of_cellular_process_(GO:0048523)	1/186	0.318507	0.337993	0.73256	0.758182	0.0801156	-0.091661	SWI4	GO Biological Process AutoRIF predicted Zscore
endoplasmic_reticulum_membrane_organization_(GO:0090158)	1/200	0.337993	0.337993	0.758182	0.758182	0.0852339	-0.0924558	CLB2	GO Biological Process AutoRIF predicted Zscore
glycoprotein_metabolic_process_(GO:0009100)	1/200	0.337993	0.337993	0.758182	0.758182	0.0924614	-0.100296	MCM7	GO Biological Process AutoRIF predicted Zscore
COPII-coated_vesicle_budding_(GO:0090114)	1/200	0.337993	0.337993	0.758182	0.758182	0.0953168	-0.103393	CLB2	GO Biological Process AutoRIF predicted Zscore
glycoprotein_biosynthetic_process_(GO:0009101)	1/200	0.337993	0.337993	0.758182	0.758182	0.0971512	-0.105383	MCM7	GO Biological Process AutoRIF predicted Zscore
positive_regulation_of_receptor-mediated_endocytosis_(GO:0048260)	1/200	0.337993	0.337993	0.758182	0.758182	0.101841	-0.11047	MCM1	GO Biological Process AutoRIF predicted Zscore
rRNA_transport_(GO:0051029)	1/200	0.337993	0.337993	0.758182	0.758182	0.119216	-0.129317	CLB2	GO Biological Process AutoRIF predicted Zscore
phytosteroid_biosynthetic_process_(GO:0016129)	1/197	0.333863	0.337993	0.752901	0.758182	0.125358	-0.137521	MCM7	GO Biological Process AutoRIF predicted Zscore
calcium_ion_transmembrane_transport_(GO:0070588)	1/200	0.337993	0.337993	0.758182	0.758182	0.134868	-0.146296	PCL2	GO Biological Process AutoRIF predicted Zscore
pyrimidine_deoxyribonucleoside_monophosphate_biosynthetic_process_(GO:0009177)	1/200	0.337993	0.337993	0.758182	0.758182	0.140539	-0.152447	FAR1	GO Biological Process AutoRIF predicted Zscore
RNA_methylation_(GO:0001510)	1/200	0.337993	0.337993	0.758182	0.758182	0.148903	-0.16152	MCM6	GO Biological Process AutoRIF predicted Zscore
Golgi_to_vacuole_transport_(GO:0006896)	1/200	0.337993	0.337993	0.758182	0.758182	0.16429	-0.17821	RAD53	GO Biological Process AutoRIF predicted Zscore
RNA_export_from_nucleus_(GO:0006405)	1/200	0.337993	0.337993	0.758182	0.758182	0.167248	-0.181419	CLB2	GO Biological Process AutoRIF predicted Zscore
monovalent_inorganic_cation_transport_(GO:0015672)	1/200	0.337993	0.337993	0.758182	0.758182	0.173149	-0.18782	MCM1	GO Biological Process AutoRIF predicted Zscore
membrane_fusion_(GO:0061025)	1/187	0.319917	0.337993	0.734474	0.758182	0.165573	-0.188703	SWI4	GO Biological Process AutoRIF predicted Zscore
termination_of_RNA_polymerase_II_transcription,_exosome-dependent_(GO:0030847)	1/200	0.337993	0.337993	0.758182	0.758182	0.203602	-0.220853	GIN4	GO Biological Process AutoRIF predicted Zscore
RNA-dependent_DNA_biosynthetic_process_(GO:0006278)	1/200	0.337993	0.337993	0.758182	0.758182	0.217203	-0.235607	MCM6	GO Biological Process AutoRIF predicted Zscore
RNA_import_into_nucleus_(GO:0006404)	1/200	0.337993	0.337993	0.758182	0.758182	0.241785	-0.262272	CLB2	GO Biological Process AutoRIF predicted Zscore
positive_regulation_of_translational_initiation_(GO:0045948)	1/200	0.337993	0.337993	0.758182	0.758182	0.24824	-0.269274	CLB2	GO Biological Process AutoRIF predicted Zscore
actin_cortical_patch_assembly_(GO:0000147)	1/200	0.337993	0.337993	0.758182	0.758182	0.255621	-0.27728	MCM1	GO Biological Process AutoRIF predicted Zscore
rRNA_export_from_nucleus_(GO:0006407)	1/200	0.337993	0.337993	0.758182	0.758182	0.263427	-0.285747	CLB2	GO Biological Process AutoRIF predicted Zscore
isopentenyl_diphosphate_biosynthetic_process_(GO:0009240)	1/200	0.337993	0.337993	0.758182	0.758182	0.270675	-0.29361	MCM7	GO Biological Process AutoRIF predicted Zscore
tRNA_catabolic_process_(GO:0016078)	1/200	0.337993	0.337993	0.758182	0.758182	0.318688	-0.345691	CLB2	GO Biological Process AutoRIF predicted Zscore
ribosomal_small_subunit_export_from_nucleus_(GO:0000056)	1/200	0.337993	0.337993	0.758182	0.758182	0.347392	-0.376827	CLB2	GO Biological Process AutoRIF predicted Zscore
retrograde_transport,_vesicle_recycling_within_Golgi_(GO:0000301)	1/200	0.337993	0.337993	0.758182	0.758182	0.357643	-0.387947	CLB2	GO Biological Process AutoRIF predicted Zscore
regulation_of_actin_cytoskeleton_reorganization_(GO:2000249)	1/200	0.337993	0.337993	0.758182	0.758182	0.362418	-0.393126	SWI4	GO Biological Process AutoRIF predicted Zscore
actin_filament_capping_(GO:0051693)	1/200	0.337993	0.337993	0.758182	0.758182	0.373049	-0.404658	DBF2	GO Biological Process AutoRIF predicted Zscore
tRNA_metabolic_process_(GO:0006399)	1/200	0.337993	0.337993	0.758182	0.758182	0.421502	-0.457216	CLB2	GO Biological Process AutoRIF predicted Zscore
RNA_processing_(GO:0006396)	1/200	0.337993	0.337993	0.758182	0.758182	0.46697	-0.506537	MCM6	GO Biological Process AutoRIF predicted Zscore
transcription_elongation_from_RNA_polymerase_I_promoter_(GO:0006362)	1/200	0.337993	0.337993	0.758182	0.758182	0.476024	-0.516358	CLB2	GO Biological Process AutoRIF predicted Zscore
translational_frameshifting_(GO:0006452)	1/200	0.337993	0.337993	0.758182	0.758182	0.4985	-0.540739	CLB2	GO Biological Process AutoRIF predicted Zscore
regulation_of_gene_expression_(GO:0010468)	1/198	0.335243	0.337993	0.754674	0.758182	0.566781	-0.619435	RAD53	GO Biological Process AutoRIF predicted Zscore
prion_loss	1/200	0.337993	0.337993	0.869497	0.869497	0.223727	-0.242684	MCM1	Phenotype AutoRIF predicted Zscore
viability	1/200	0.337993	0.337993	0.869497	0.869497	0.482521	-0.523406	MCM1	Phenotype AutoRIF predicted Zscore
phosphatidylcholine_metabolic_process_(GO:0046470)	1/189	0.322729	0.338097	0.818404	0.859112	0.268925	-0.304138	CDC28	GO Biological Process AutoRIF
phosphatidylcholine_biosynthetic_process_(GO:0006656)	1/189	0.322729	0.338097	0.818404	0.859112	0.270621	-0.306056	CDC28	GO Biological Process AutoRIF
gluconeogenesis_(GO:0006094)	1/190	0.324131	0.338644	0.820062	0.859112	0.33544	-0.377909	CDC28	GO Biological Process AutoRIF
oligopeptide_transport_(GO:0006857)	1/190	0.324131	0.338644	0.820062	0.859112	0.396921	-0.447175	CDC28	GO Biological Process AutoRIF
regulation_of_cytoplasmic_translation_(GO:2000765)	1/192	0.326926	0.34064	0.823333	0.859551	0.277777	-0.310561	CLB2	GO Biological Process AutoRIF
negative_regulation_of_homeostatic_process_(GO:0032845)	1/192	0.326926	0.34064	0.823333	0.859551	0.322188	-0.360213	CDC28	GO Biological Process AutoRIF
glyceraldehyde-3-phosphate_metabolic_process_(GO:0019682)	1/193	0.328319	0.341168	0.824946	0.859551	0.325247	-0.36225	CDC28	GO Biological Process AutoRIF
mRNA_3'-end_processing_(GO:0031124)	1/193	0.328319	0.341168	0.824946	0.859551	0.395069	-0.440016	CLB2	GO Biological Process AutoRIF
protein_maturation_(GO:0051604)	1/195	0.331097	0.343591	0.82813	0.861703	0.496032	-0.548286	DBF2	GO Biological Process AutoRIF
sulfur_compound_transport_(GO:0072348)	1/205	0.344819	0.357349	0.843222	0.873921	0.438827	-0.467234	CDC28	GO Biological Process AutoRIF
endoplasmic_reticulum_to_cytosol_transport_(GO:1903513)	1/206	0.346176	0.358274	0.844658	0.874176	0.505472	-0.536208	PHO5	GO Biological Process AutoRIF
phosphatidylinositol_biosynthetic_process_(GO:0006661)	1/213	0.355599	0.367039	0.854358	0.881844	0.413172	-0.4272	RAD53	GO Biological Process AutoRIF
phosphatidylinositol_metabolic_process_(GO:0046488)	1/213	0.355599	0.367039	0.854358	0.881844	0.416345	-0.43048	RAD53	GO Biological Process AutoRIF
tricarboxylic_acid_metabolic_process_(GO:0072350)	1/214	0.356934	0.367924	0.855694	0.882041	0.454244	-0.467965	CDC28	GO Biological Process AutoRIF
vesicle_budding_from_membrane_(GO:0006900)	1/215	0.358267	0.368804	0.857019	0.882225	0.723752	-0.742915	CDC28	GO Biological Process AutoRIF
mitochondrial_fission_(GO:0000266)	1/216	0.359596	0.369679	0.858331	0.882397	0.26532	-0.271362	RAD53	GO Biological Process AutoRIF
pyruvate_metabolic_process_(GO:0006090)	1/222	0.367519	0.37732	0.865964	0.889056	0.265153	-0.265413	RAD53	GO Biological Process AutoRIF
cellular_response_to_oxidative_stress_(GO:0034599)	1/227	0.374048	0.383512	0.872016	0.894078	0.710938	-0.699115	RAD53	GO Biological Process AutoRIF
utilization_of_carbon_source	1/238	0.388182	0.388182	0.942	0.942	0.755325	-0.714749	CDC28	Phenotype AutoRIF
regulation_of_phospholipid_translocation_(GO:0061091)	1/239	0.389451	0.398773	0.885475	0.90667	0.504059	-0.475336	CDC28	GO Biological Process AutoRIF
cellular_metal_ion_homeostasis_(GO:0006875)	1/243	0.394503	0.40341	0.889647	0.909732	0.408528	-0.379984	SWI4	GO Biological Process AutoRIF
response_to_acidic_pH_(GO:0010447)	1/246	0.398265	0.406716	0.892678	0.911621	0.619875	-0.57068	RAD53	GO Biological Process AutoRIF
coenzyme_biosynthetic_process_(GO:0009108)	1/249	0.402004	0.409991	0.895628	0.913421	0.436112	-0.397426	SMC3	GO Biological Process AutoRIF
cation_transport_(GO:0006812)	1/253	0.406955	0.414491	0.899438	0.915831	0.489627	-0.440201	DBF2	GO Biological Process AutoRIF
NADP_metabolic_process_(GO:0006739)	1/254	0.408186	0.415196	0.900369	0.915831	0.303888	-0.272294	CLB5	GO Biological Process AutoRIF
metal_ion_homeostasis_(GO:0055065)	1/272	0.429928	0.436734	0.91576	0.930258	0.280681	-0.236933	SWI4	GO Biological Process AutoRIF
pentose_metabolic_process_(GO:0019321)	1/285	0.445144	0.450392	0.925407	0.934599	0.348358	-0.281946	RAD53	GO Biological Process AutoRIF
phospholipid_biosynthetic_process_(GO:0008654)	1/286	0.446298	0.450392	0.926103	0.934599	0.400367	-0.323003	CDC28	GO Biological Process AutoRIF
phospholipid_catabolic_process_(GO:0009395)	1/286	0.446298	0.450392	0.926103	0.934599	0.402861	-0.325016	CDC28	GO Biological Process AutoRIF
phospholipid_metabolic_process_(GO:0006644)	1/286	0.446298	0.450392	0.926103	0.934599	0.407218	-0.328531	CDC28	GO Biological Process AutoRIF
coenzyme_transport_(GO:0051182)	1/286	0.446298	0.450392	0.926103	0.934599	0.61251	-0.494154	PHO5	GO Biological Process AutoRIF
vitamin_transport_(GO:0051180)	1/292	0.453172	0.456731	0.930146	0.937451	0.391379	-0.30977	PHO5	GO Biological Process AutoRIF
mRNA_transport_(GO:0051028)	1/310	0.473299	0.476393	0.941023	0.947174	0.596572	-0.446252	SWI5	GO Biological Process AutoRIF
response_to_ethanol_(GO:0045471)	1/314	0.477673	0.480167	0.943206	0.948131	0.600383	-0.44358	RAD53	GO Biological Process AutoRIF
mitochondrial_RNA_metabolic_process_(GO:0000959)	1/324	0.488453	0.490363	0.948323	0.951764	0.551276	-0.394997	BUB1	GO Biological Process AutoRIF
mRNA_modification_(GO:0016556)	1/326	0.490582	0.49186	0.949291	0.951764	0.391874	-0.279078	CLB2	GO Biological Process AutoRIF
mitochondrial_fusion_(GO:0008053)	1/344	0.509364	0.510027	0.957245	0.958489	0.409351	-0.276145	RAD53	GO Biological Process AutoRIF
nucleotide_transport_(GO:0006862)	1/362	0.52747	0.52747	0.963976	0.963976	0.496864	-0.317825	CDC5	GO Biological Process AutoRIF

## Sheet: e. 60-70min_KEGGcc_GOenrichment
Term	Overlap	P-value	Adjusted P-value	Old P-value	Old Adjusted P-value	Z-score	Combined Score	Genes	Category
mitotic cell cycle phase transition (GO:0044772)	12/54	6.7953e-25	1.25713e-22	2.87608e-16	5.32075e-14	-1.55907	86.76	CDC53;CLB6;CLN2;SIC1;CLB5;CLB4;CLB3;CLB2;CLB1;CDC28;CDC4;SKP1	GO Biological Process 2018
cell cycle G2/M phase transition (GO:0044839)	10/25	9.68133e-24	8.95523e-22	9.46164e-16	8.75202e-14	-1.89169	100.244	CDC53;CLB6;CLN2;CLB5;CLB4;CLB3;CLB2;CLB1;CDC4;SKP1	GO Biological Process 2018
G2/M transition of mitotic cell cycle (GO:0000086)	10/27	2.49477e-23	1.53844e-21	1.78348e-15	1.09981e-13	-1.47726	76.8842	CDC53;CLB6;CLN2;CLB5;CLB4;CLB3;CLB2;CLB1;CDC4;SKP1	GO Biological Process 2018
regulation of cell proliferation (GO:0042127)	8/11	5.76287e-22	1.77689e-20	2.64231e-14	8.14713e-13	-2.32967	113.934	CLB6;CLN2;CLB5;CLB4;CLB3;CLB2;CLB1;CDC28	GO Biological Process 2018
positive regulation of cell proliferation (GO:0008284)	8/11	5.76287e-22	1.77689e-20	2.64231e-14	8.14713e-13	-1.77294	86.7063	CLB6;CLN2;CLB5;CLB4;CLB3;CLB2;CLB1;CDC28	GO Biological Process 2018
positive regulation of cell cycle (GO:0045787)	9/20	5.5397e-22	1.77689e-20	1.36993e-14	6.33592e-13	-1.6645	81.4688	CLB6;CLN2;CLB5;CLB4;CLB3;CLB2;CLB1;CDC28;CKS1	GO Biological Process 2018
G1/S transition of mitotic cell cycle (GO:0000082)	10/40	2.4816e-21	6.55851e-20	5.03846e-14	1.33159e-12	-1.47962	70.201	CDC53;CLB6;SIC1;CLB5;PCL9;SWI5;CDC28;PHO85;CDC4;SKP1	GO Biological Process 2018
regulation of cyclin-dependent protein serine/threonine kinase activity (GO:0000079)	9/29	3.27915e-20	7.58302e-19	2.16152e-13	4.99851e-12	-1.52883	68.5896	CLB6;CLN2;SIC1;CLB5;CLB4;CLB3;CLB2;CLB1;CKS1	GO Biological Process 2018
positive regulation of cellular process (GO:0048522)	8/17	8.44768e-20	1.73647e-18	3.70044e-13	7.60646e-12	-1.60984	70.7007	CLB6;CLN2;CLB5;CLB4;CLB3;CLB2;CLB1;CDC28	GO Biological Process 2018
regulation of mitotic nuclear division (GO:0007088)	9/34	1.71042e-19	3.16428e-18	7.34931e-13	1.35962e-11	-1.38243	59.738	CLB6;CLN2;CLB5;CLB4;CDC14;CLB3;CLB2;CLB1;SKP1	GO Biological Process 2018
regulation of cyclin-dependent protein kinase activity (GO:1904029)	8/22	1.10651e-18	1.86094e-17	1.96678e-12	3.30777e-11	-1.50384	62.1769	CLB6;CLN2;SIC1;CLB5;CLB4;CLB3;CLB2;CLB1	GO Biological Process 2018
regulation of mitotic cell cycle (GO:0007346)	9/44	2.29312e-18	3.53523e-17	5.57889e-12	8.60079e-11	-1.55513	63.1642	CLB6;CLN2;CLB5;CLB4;CLB3;CLB2;CLB1;CDC28;CKS1	GO Biological Process 2018
regulation of protein serine/threonine kinase activity (GO:0071900)	8/28	1.07006e-17	1.52278e-16	9.95114e-12	1.41612e-10	-1.67576	65.4826	CLB6;CLN2;SIC1;CLB5;CLB4;CLB3;CLB2;CLB1	GO Biological Process 2018
regulation of transcription involved in G1/S transition of mitotic cell cycle (GO:0000083)	8/33	4.75988e-17	6.28984e-16	3.086e-11	4.07792e-10	-1.41077	53.022	MBP1;WHI5;PCL9;YOX1;SWI6;SWI5;SWI4;PHO85	GO Biological Process 2018
positive regulation of spindle pole body separation (GO:0010696)	6/8	9.31452e-17	1.14879e-15	5.6102e-11	6.91924e-10	-2.13163	78.6836	CLB5;CLB4;CLB3;CLB2;CLB1;CDC28	GO Biological Process 2018
regulation of spindle pole body separation (GO:0010695)	6/10	6.97331e-16	8.0629e-15	1.48465e-10	1.71662e-09	-2.46224	85.9303	CLB5;CLB4;CLB3;CLB2;CLB1;CDC28	GO Biological Process 2018
regulation of nuclear division (GO:0051783)	7/23	8.46179e-16	9.20842e-15	1.60255e-10	1.74395e-09	-1.86406	64.6938	CLB6;CLN2;CLB5;CLB4;CLB3;CLB2;CLB1	GO Biological Process 2018
positive regulation of cell cycle process (GO:0090068)	7/25	1.65627e-15	1.70228e-14	2.62986e-10	2.70292e-09	-1.7141	58.3381	CLB5;CLB4;CDC14;CLB3;CLB2;CLB1;CDC28	GO Biological Process 2018
regulation of cell cycle (GO:0051726)	8/51	2.15001e-15	2.09343e-14	6.71134e-10	6.20799e-09	-1.43362	48.4181	CLB6;CLN2;CLB5;CLB4;CLB3;CLB2;CLB1;CKS1	GO Biological Process 2018
cell cycle G1/S phase transition (GO:0044843)	7/28	4.06894e-15	3.76377e-14	5.19564e-10	5.05891e-09	-1.50858	49.9875	CDC53;CLB6;SIC1;CLB5;CDC28;CDC4;SKP1	GO Biological Process 2018
regulation of cell cycle process (GO:0010564)	7/36	2.84863e-14	2.50951e-13	2.41652e-09	2.12884e-08	-1.57149	49.0137	CLB6;CLN2;CLB5;CLB4;CLB3;CLB2;CLB1	GO Biological Process 2018
positive regulation of cytoskeleton organization (GO:0051495)	6/20	1.27553e-13	1.07261e-12	4.10801e-09	3.45446e-08	-1.51696	45.039	CLB5;CLB4;CLB3;CLB2;CLB1;CDC28	GO Biological Process 2018
regulation of spindle assembly (GO:0090169)	4/6	3.94267e-11	3.17128e-10	1.73863e-07	1.39846e-06	-1.81195	43.4081	CLB5;CLB4;CLB3;CDC28	GO Biological Process 2018
regulation of mitotic spindle organization (GO:0060236)	4/10	5.49945e-10	4.23916e-09	8.15896e-07	6.2892e-06	-1.70553	36.3639	CLB5;CLB4;CLB3;CLB2	GO Biological Process 2018
asparagine catabolic process (GO:0006530)	3/10	2.61635e-07	1.9361e-06	4.58858e-05	0.000339555	-1.96074	29.7176	MBP1;SWI6;SWI4	GO Biological Process 2018
positive regulation of transcription involved in G1/S transition of mitotic cell cycle (GO:0071931)	3/12	4.78801e-07	3.28068e-06	7.24449e-05	0.000496382	-1.85602	27.0087	MBP1;SWI6;SWI4	GO Biological Process 2018
glutamine family amino acid catabolic process (GO:0009065)	3/12	4.78801e-07	3.28068e-06	7.24449e-05	0.000496382	-1.77938	25.8935	MBP1;SWI6;SWI4	GO Biological Process 2018
asparagine metabolic process (GO:0006528)	3/14	7.90773e-07	5.04459e-06	0.000107446	0.000685431	-2.16267	30.386	MBP1;SWI6;SWI4	GO Biological Process 2018
aspartate family amino acid catabolic process (GO:0009068)	3/14	7.90773e-07	5.04459e-06	0.000107446	0.000685431	-2.08575	29.3053	MBP1;SWI6;SWI4	GO Biological Process 2018
SCF-dependent proteasomal ubiquitin-dependent protein catabolic process (GO:0031146)	3/21	2.87121e-06	1.77058e-05	0.000311382	0.00192019	-1.84342	23.5235	CDC53;CDC4;SKP1	GO Biological Process 2018
regulation of transcription, DNA-templated (GO:0006355)	5/177	3.53675e-06	2.11064e-05	0.00325265	0.0130813	-1.51749	19.048	PCL9;SWI5;CDC28;CKS1;PHO85	GO Biological Process 2018
monocarboxylic acid catabolic process (GO:0072329)	3/24	4.35764e-06	2.51926e-05	0.000444878	0.00265492	-1.71156	21.1268	MBP1;SWI6;SWI4	GO Biological Process 2018
positive regulation of cellular biosynthetic process (GO:0031328)	3/25	4.94741e-06	2.77355e-05	0.000496367	0.00286962	-1.69963	20.7638	CLB6;CLB5;PHO85	GO Biological Process 2018
regulation of mitotic cell cycle phase transition (GO:1901990)	3/26	5.58769e-06	3.04036e-05	0.000551534	0.00309193	-1.77407	21.4572	CDC14;CDC28;SKP1	GO Biological Process 2018
cellular protein modification process (GO:0006464)	5/213	8.71892e-06	4.60857e-05	0.00702469	0.0240661	-1.43617	16.7314	RAD53;CDC14;CDC28;KCC4;PHO85	GO Biological Process 2018
positive regulation of transcription, DNA-templated (GO:0045893)	5/241	1.58437e-05	8.14191e-05	0.0115717	0.0358283	-1.43	15.8054	MBP1;SWI6;SWI4;CDC28;CKS1	GO Biological Process 2018
negative regulation of transcription, DNA-templated (GO:0045892)	4/132	2.82801e-05	0.0001414	0.00689885	0.0240661	-1.30588	13.6769	WHI5;YOX1;CDC28;PHO85	GO Biological Process 2018
positive regulation of reproductive process (GO:2000243)	2/7	3.67035e-05	0.000157911	0.00110549	0.00538197	-2.06328	21.0716	SWI5;CDC28	GO Biological Process 2018
positive regulation of DNA metabolic process (GO:0051054)	2/7	3.67035e-05	0.000157911	0.00110549	0.00538197	-2.03588	20.7917	CLB6;CLB5	GO Biological Process 2018
regulation of establishment or maintenance of cell polarity (GO:0032878)	2/7	3.67035e-05	0.000157911	0.00110549	0.00538197	-2.03255	20.7577	PCL9;PHO85	GO Biological Process 2018
negative regulation of macroautophagy (GO:0016242)	2/7	3.67035e-05	0.000157911	0.00110549	0.00538197	-1.95426	19.9581	SIC1;PHO85	GO Biological Process 2018
negative regulation of mitotic cell cycle (GO:0045930)	2/7	3.67035e-05	0.000157911	0.00110549	0.00538197	-1.89383	19.341	CDC14;CDC28	GO Biological Process 2018
phosphorylation (GO:0016310)	4/139	3.46303e-05	0.000157911	0.00822331	0.0276602	-1.28509	13.1988	RAD53;CDC28;KCC4;PHO85	GO Biological Process 2018
protein phosphorylation (GO:0006468)	4/144	3.97657e-05	0.000167197	0.00926607	0.0300741	-1.5083	15.2829	RAD53;CDC28;KCC4;PHO85	GO Biological Process 2018
negative regulation of transcription involved in G1/S transition of mitotic cell cycle (GO:0071930)	2/8	4.88973e-05	0.000201022	0.00137699	0.00653187	-1.90884	18.9468	WHI5;YOX1	GO Biological Process 2018
positive regulation of cyclin-dependent protein kinase activity (GO:1904031)	2/9	6.28155e-05	0.000247253	0.00167706	0.00756722	-1.84037	17.8062	CLB2;CKS1	GO Biological Process 2018
positive regulation of cyclin-dependent protein serine/threonine kinase activity (GO:0045737)	2/9	6.28155e-05	0.000247253	0.00167706	0.00756722	-1.78429	17.2636	CLB2;CKS1	GO Biological Process 2018
positive regulation of macromolecule biosynthetic process (GO:0010557)	2/10	7.8454e-05	0.00029028	0.00200539	0.00843173	-2.13192	20.153	CLB6;CLB5	GO Biological Process 2018
mitotic spindle assembly (GO:0090307)	2/10	7.8454e-05	0.00029028	0.00200539	0.00843173	-1.98329	18.748	CDC14;CDC28	GO Biological Process 2018
regulation of DNA replication (GO:0006275)	2/10	7.8454e-05	0.00029028	0.00200539	0.00843173	-1.85207	17.5076	CLB6;CLB5	GO Biological Process 2018
modification-dependent protein catabolic process (GO:0019941)	3/72	0.000122977	0.000446092	0.00855641	0.0282667	-1.26352	11.3761	CDC53;CDC4;SKP1	GO Biological Process 2018
positive regulation of protein serine/threonine kinase activity (GO:0071902)	2/13	0.000135647	0.000482592	0.00315682	0.012978	-1.75041	15.5882	CLB2;CKS1	GO Biological Process 2018
traversing start control point of mitotic cell cycle (GO:0007089)	2/14	0.000158124	0.000551941	0.00359511	0.014151	-1.66822	14.6005	CLN2;WHI5	GO Biological Process 2018
DNA metabolic process (GO:0006259)	4/207	0.000162303	0.000556038	0.0303088	0.0849565	-1.70555	14.8827	RAD53;CDC28;RAD17;MCM5	GO Biological Process 2018
positive regulation of G1/S transition of mitotic cell cycle (GO:1900087)	2/15	0.000182298	0.000602236	0.00406013	0.0153291	-1.87909	16.1788	CLN2;WHI5	GO Biological Process 2018
negative regulation of autophagy (GO:0010507)	2/15	0.000182298	0.000602236	0.00406013	0.0153291	-1.82322	15.6977	SIC1;PHO85	GO Biological Process 2018
DNA damage checkpoint (GO:0000077)	2/19	0.000295898	0.000960372	0.00618167	0.0228722	-1.47486	11.984	RAD53;RAD17	GO Biological Process 2018
septin ring assembly (GO:0000921)	2/20	0.000328502	0.00103005	0.00677596	0.0240661	-1.50291	12.0548	KCC4;SKP1	GO Biological Process 2018
positive regulation of transcription from RNA polymerase II promoter in response to heat stress (GO:0061408)	2/20	0.000328502	0.00103005	0.00677596	0.0240661	-1.48536	11.914	SWI6;SWI4	GO Biological Process 2018
regulation of exit from mitosis (GO:0007096)	2/27	0.000603338	0.00182098	0.01162	0.0358283	-1.4598	10.8215	CDC14;SKP1	GO Biological Process 2018
regulation of macroautophagy (GO:0016241)	2/27	0.000603338	0.00182098	0.01162	0.0358283	-1.41784	10.5105	SIC1;PHO85	GO Biological Process 2018
ubiquitin-dependent protein catabolic process (GO:0006511)	3/124	0.000610273	0.00182098	0.0347023	0.0944108	-1.41824	10.4972	CDC53;CDC4;SKP1	GO Biological Process 2018
DNA replication initiation (GO:0006270)	2/34	0.000958709	0.00277783	0.017594	0.0533587	-1.40091	9.73622	RAD53;MCM5	GO Biological Process 2018
proteasome-mediated ubiquitin-dependent protein catabolic process (GO:0043161)	3/145	0.000960979	0.00277783	0.0509195	0.107047	-1.25857	8.744	CDC53;CDC4;SKP1	GO Biological Process 2018
septin ring organization (GO:0031106)	2/35	0.00101597	0.00278311	0.0185343	0.0535758	-1.60221	11.0423	KCC4;SKP1	GO Biological Process 2018
negative regulation of cellular macromolecule biosynthetic process (GO:2000113)	2/35	0.00101597	0.00278311	0.0185343	0.0535758	-1.48521	10.236	CDC28;PHO85	GO Biological Process 2018
regulation of transcription from RNA polymerase II promoter (GO:0006357)	4/337	0.00102298	0.00278311	0.126175	0.164384	-1.34212	9.24052	SWI6;CDC28;CKS1;PHO85	GO Biological Process 2018
mitotic spindle organization (GO:0007052)	2/35	0.00101597	0.00278311	0.0185343	0.0535758	-1.24853	8.60478	CLB1;CDC28	GO Biological Process 2018
cellular response to DNA damage stimulus (GO:0006974)	3/149	0.00103957	0.00278725	0.0543674	0.107474	-1.36654	9.38666	RAD53;RAD17;PHO85	GO Biological Process 2018
positive regulation of transcription from RNA polymerase II promoter in response to stress (GO:0036003)	2/43	0.00153165	0.00404794	0.0267911	0.0762516	-1.32093	8.5615	SWI6;SWI4	GO Biological Process 2018
mitotic nuclear division (GO:0140014)	2/47	0.00182749	0.00476176	0.0313834	0.0866557	-1.27966	8.06802	CDC28;SKP1	GO Biological Process 2018
protein localization to nucleus (GO:0034504)	2/59	0.00286384	0.00735847	0.0468386	0.103156	-1.22859	7.1941	CDC28;FAR1	GO Biological Process 2018
cellular response to heat (GO:0034605)	2/72	0.00423225	0.0107256	0.0660853	0.112968	-1.20132	6.56521	SWI6;SWI4	GO Biological Process 2018
DNA-dependent DNA replication (GO:0006261)	2/73	0.00434786	0.0108697	0.0676614	0.113702	-1.41037	7.66972	RAD53;MCM5	GO Biological Process 2018
protein modification by small protein conjugation (GO:0032446)	2/74	0.00446493	0.0110135	0.0692502	0.113702	-1.22544	6.63148	CDC4;SKP1	GO Biological Process 2018
organelle assembly (GO:0070925)	2/80	0.00519775	0.0126524	0.0790399	0.122877	-1.51416	7.96374	KCC4;SKP1	GO Biological Process 2018
double-strand break repair (GO:0006302)	2/81	0.00532492	0.0127937	0.0807127	0.123115	-1.24504	6.51822	CDC28;RAD17	GO Biological Process 2018
positive regulation of transcription from RNA polymerase II promoter (GO:0045944)	3/270	0.00560058	0.0132834	0.202664	0.224508	-1.17205	6.07693	SWI6;CDC28;CKS1	GO Biological Process 2018
regulation of double-strand break repair via nonhomologous end joining (GO:2001032)	1/6	0.00807372	0.0171682	0.0393617	0.0958147	-2.60349	12.5466	CDC28	GO Biological Process 2018
regulation of mating type switching (GO:0031494)	1/6	0.00807372	0.0171682	0.0393617	0.0958147	-2.17064	10.4606	SWI5	GO Biological Process 2018
negative regulation of phosphorylation (GO:0042326)	1/6	0.00807372	0.0171682	0.0393617	0.0958147	-1.98716	9.57639	RAD53	GO Biological Process 2018
maintenance of protein localization in organelle (GO:0072595)	1/6	0.00807372	0.0171682	0.0393617	0.0958147	-1.95777	9.43479	FAR1	GO Biological Process 2018
regulation of nuclear cell cycle DNA replication (GO:0033262)	1/6	0.00807372	0.0171682	0.0393617	0.0958147	-1.94413	9.36902	CDC28	GO Biological Process 2018
negative regulation of glycogen biosynthetic process (GO:0045719)	1/6	0.00807372	0.0171682	0.0393617	0.0958147	-1.89836	9.14848	PHO85	GO Biological Process 2018
negative regulation of protein dephosphorylation (GO:0035308)	1/6	0.00807372	0.0171682	0.0393617	0.0958147	-1.86848	9.00446	CLB2	GO Biological Process 2018
negative regulation of sequence-specific DNA binding transcription factor activity (GO:0043433)	1/6	0.00807372	0.0171682	0.0393617	0.0958147	-1.82996	8.81882	PHO85	GO Biological Process 2018
cellular protein complex assembly (GO:0043623)	2/98	0.00770224	0.0171682	0.110738	0.155201	-1.31694	6.40855	KCC4;SKP1	GO Biological Process 2018
regulation of DNA biosynthetic process (GO:2000278)	1/7	0.00941322	0.018526	0.0448616	0.0999926	-2.43542	11.3628	CDC28	GO Biological Process 2018
negative regulation of protein modification process (GO:0031400)	1/7	0.00941322	0.018526	0.0448616	0.0999926	-1.96225	9.15514	CLB2	GO Biological Process 2018
positive regulation of mitotic cell cycle (GO:0045931)	1/7	0.00941322	0.018526	0.0448616	0.0999926	-1.94321	9.0663	CDC28	GO Biological Process 2018
regulation of G2/M transition of mitotic cell cycle (GO:0010389)	1/7	0.00941322	0.018526	0.0448616	0.0999926	-1.87487	8.74748	CDC28	GO Biological Process 2018
regulation of phospholipid biosynthetic process (GO:0071071)	1/7	0.00941322	0.018526	0.0448616	0.0999926	-1.81434	8.46505	PHO85	GO Biological Process 2018
spindle disassembly (GO:0051230)	1/7	0.00941322	0.018526	0.0448616	0.0999926	-1.67939	7.83542	CDC14	GO Biological Process 2018
negative regulation of glycogen metabolic process (GO:0070874)	1/7	0.00941322	0.018526	0.0448616	0.0999926	-1.65215	7.70832	PHO85	GO Biological Process 2018
protein neddylation (GO:0045116)	1/8	0.010751	0.0205044	0.0503311	0.107026	-1.87056	8.47881	SKP1	GO Biological Process 2018
negative regulation of nucleic acid-templated transcription (GO:1903507)	1/8	0.010751	0.0205044	0.0503311	0.107026	-1.75974	7.97647	CDC28	GO Biological Process 2018
regulation of cytoplasmic translation (GO:2000765)	1/8	0.010751	0.0205044	0.0503311	0.107026	-1.68303	7.62876	SKP1	GO Biological Process 2018
negative regulation of meiotic cell cycle (GO:0051447)	1/9	0.012087	0.0215009	0.0557704	0.107474	-2.08176	9.19228	CDC28	GO Biological Process 2018
7-methylguanosine mRNA capping (GO:0006370)	1/9	0.012087	0.0215009	0.0557704	0.107474	-1.98854	8.78063	CDC28	GO Biological Process 2018
regulation of phosphorylation (GO:0042325)	1/9	0.012087	0.0215009	0.0557704	0.107474	-1.93113	8.52716	RAD53	GO Biological Process 2018
regulation of meiotic cell cycle (GO:0051445)	1/9	0.012087	0.0215009	0.0557704	0.107474	-1.88841	8.3385	CDC28	GO Biological Process 2018
7-methylguanosine RNA capping (GO:0009452)	1/9	0.012087	0.0215009	0.0557704	0.107474	-1.78145	7.86622	CDC28	GO Biological Process 2018
DNA double-strand break processing (GO:0000729)	1/9	0.012087	0.0215009	0.0557704	0.107474	-1.77992	7.85945	CDC28	GO Biological Process 2018
regulation of organelle assembly (GO:1902115)	1/9	0.012087	0.0215009	0.0557704	0.107474	-1.58255	6.98795	CDC28	GO Biological Process 2018
positive regulation of DNA-dependent DNA replication (GO:2000105)	1/10	0.0134213	0.0223688	0.0611798	0.109886	-1.86403	8.03566	CDC28	GO Biological Process 2018
kinetochore assembly (GO:0051382)	1/10	0.0134213	0.0223688	0.0611798	0.109886	-1.73699	7.48801	SKP1	GO Biological Process 2018
peptidyl-threonine phosphorylation (GO:0018107)	1/10	0.0134213	0.0223688	0.0611798	0.109886	-1.69747	7.31763	CDC28	GO Biological Process 2018
peptidyl-threonine modification (GO:0018210)	1/10	0.0134213	0.0223688	0.0611798	0.109886	-1.66537	7.17927	CDC28	GO Biological Process 2018
meiosis II (GO:0007135)	1/10	0.0134213	0.0223688	0.0611798	0.109886	-1.61982	6.98292	CLB3	GO Biological Process 2018
positive regulation of phospholipid biosynthetic process (GO:0071073)	1/10	0.0134213	0.0223688	0.0611798	0.109886	-1.59641	6.88198	PHO85	GO Biological Process 2018
regulation of phosphate metabolic process (GO:0019220)	1/10	0.0134213	0.0223688	0.0611798	0.109886	-1.44089	6.21157	PHO85	GO Biological Process 2018
regulation of telomere maintenance via telomerase (GO:0032210)	1/11	0.0147538	0.0235298	0.0665592	0.112968	-2.24896	9.48218	CDC28	GO Biological Process 2018
exit from mitosis (GO:0010458)	1/11	0.0147538	0.0235298	0.0665592	0.112968	-1.92078	8.09848	SKP1	GO Biological Process 2018
sister chromatid biorientation (GO:0031134)	1/11	0.0147538	0.0235298	0.0665592	0.112968	-1.73149	7.3004	CDC28	GO Biological Process 2018
regulation of cytokinesis (GO:0032465)	1/11	0.0147538	0.0235298	0.0665592	0.112968	-1.65969	6.99768	CDC14	GO Biological Process 2018
regulation of glycogen biosynthetic process (GO:0005979)	1/11	0.0147538	0.0235298	0.0665592	0.112968	-1.64786	6.94777	PHO85	GO Biological Process 2018
regulation of meiosis I (GO:0060631)	1/12	0.0160846	0.0243907	0.071909	0.113702	-1.86572	7.70522	CLB1	GO Biological Process 2018
kinetochore organization (GO:0051383)	1/12	0.0160846	0.0243907	0.071909	0.113702	-1.68457	6.95708	SKP1	GO Biological Process 2018
attachment of mitotic spindle microtubules to kinetochore (GO:0051315)	1/12	0.0160846	0.0243907	0.071909	0.113702	-1.6523	6.82382	CDC28	GO Biological Process 2018
regulation of apoptotic process (GO:0042981)	1/12	0.0160846	0.0243907	0.071909	0.113702	-1.58899	6.56235	RAD53	GO Biological Process 2018
regulation of reciprocal meiotic recombination (GO:0010520)	1/12	0.0160846	0.0243907	0.071909	0.113702	-1.54403	6.37669	SWI6	GO Biological Process 2018
regulation of protein dephosphorylation (GO:0035304)	1/12	0.0160846	0.0243907	0.071909	0.113702	-1.52243	6.28745	CLB2	GO Biological Process 2018
negative regulation of transcription from RNA polymerase II promoter (GO:0000122)	2/147	0.0166991	0.0251165	0.208834	0.228606	-1.04965	4.29559	CDC28;PHO85	GO Biological Process 2018
centromere complex assembly (GO:0034508)	1/13	0.0174137	0.0259802	0.0772293	0.12108	-1.57156	6.36562	SKP1	GO Biological Process 2018
mitotic spindle elongation (GO:0000022)	1/14	0.0187411	0.0270867	0.0825202	0.123115	-1.84714	7.34615	CDC14	GO Biological Process 2018
positive regulation of cellular catabolic process (GO:0031331)	1/14	0.0187411	0.0270867	0.0825202	0.123115	-1.47214	5.85476	CDC28	GO Biological Process 2018
spindle assembly (GO:0051225)	1/14	0.0187411	0.0270867	0.0825202	0.123115	-1.47091	5.84987	CDC28	GO Biological Process 2018
negative regulation of intracellular signal transduction (GO:1902532)	1/14	0.0187411	0.0270867	0.0825202	0.123115	-1.39213	5.53655	PHO85	GO Biological Process 2018
positive regulation of nucleic acid-templated transcription (GO:1903508)	1/15	0.0200667	0.0287778	0.0877819	0.129917	-1.59144	6.22044	CDC28	GO Biological Process 2018
regulation of meiotic nuclear division (GO:0040020)	1/16	0.0213906	0.0299793	0.0930145	0.134435	-2.14275	8.23847	CLB1	GO Biological Process 2018
synaptonemal complex assembly (GO:0007130)	1/16	0.0213906	0.0299793	0.0930145	0.134435	-1.8509	7.11637	CDC28	GO Biological Process 2018
negative regulation of chromatin silencing at telomere (GO:0031939)	1/16	0.0213906	0.0299793	0.0930145	0.134435	-1.72453	6.63046	MCM5	GO Biological Process 2018
DNA repair (GO:0006281)	2/169	0.021694	0.0301758	0.255725	0.271892	-1.04377	3.9984	RAD53;RAD17	GO Biological Process 2018
regulation of cellular protein localization (GO:1903827)	1/17	0.0227128	0.0311249	0.0982182	0.139772	-1.38954	5.25915	CDC28	GO Biological Process 2018
phosphorylation of RNA polymerase II C-terminal domain (GO:0070816)	1/17	0.0227128	0.0311249	0.0982182	0.139772	-1.36545	5.168	CDC28	GO Biological Process 2018
positive regulation of macroautophagy (GO:0016239)	1/19	0.025352	0.0344862	0.108539	0.153281	-1.62581	5.97467	PHO85	GO Biological Process 2018
synaptonemal complex organization (GO:0070193)	1/20	0.026669	0.0357519	0.113657	0.156915	-1.62602	5.89309	CDC28	GO Biological Process 2018
mitotic DNA integrity checkpoint (GO:0044774)	1/20	0.026669	0.0357519	0.113657	0.156915	-1.16439	4.22006	RAD53	GO Biological Process 2018
pre-replicative complex assembly involved in nuclear cell cycle DNA replication (GO:0006267)	1/21	0.0279843	0.036717	0.118747	0.160352	-1.48396	5.30682	MCM5	GO Biological Process 2018
regulation of DNA recombination (GO:0000018)	1/21	0.0279843	0.036717	0.118747	0.160352	-1.38524	4.95378	CDC28	GO Biological Process 2018
mitotic DNA damage checkpoint (GO:0044773)	1/21	0.0279843	0.036717	0.118747	0.160352	-1.33653	4.77959	RAD53	GO Biological Process 2018
nuclear DNA replication (GO:0033260)	1/22	0.0292979	0.0381698	0.123808	0.164384	-1.24779	4.40499	MCM5	GO Biological Process 2018
microtubule cytoskeleton organization involved in mitosis (GO:1902850)	1/23	0.0306098	0.0382623	0.128842	0.164384	-1.58086	5.51157	CLB1	GO Biological Process 2018
cellular macromolecule catabolic process (GO:0044265)	1/23	0.0306098	0.0382623	0.128842	0.164384	-1.40446	4.89655	CDC28	GO Biological Process 2018
synapsis (GO:0007129)	1/23	0.0306098	0.0382623	0.128842	0.164384	-1.35765	4.73337	CDC28	GO Biological Process 2018
positive regulation of autophagy (GO:0010508)	1/23	0.0306098	0.0382623	0.128842	0.164384	-1.34564	4.69148	PHO85	GO Biological Process 2018
regulation of DNA-dependent DNA replication initiation (GO:0030174)	1/23	0.0306098	0.0382623	0.128842	0.164384	-1.31378	4.58041	MCM5	GO Biological Process 2018
regulation of protein complex assembly (GO:0043254)	1/23	0.0306098	0.0382623	0.128842	0.164384	-1.24186	4.32967	SKP1	GO Biological Process 2018
regulation of DNA-dependent DNA replication (GO:0090329)	1/24	0.03192	0.0396322	0.133847	0.169601	-1.2838	4.42208	MCM5	GO Biological Process 2018
positive regulation of gene expression (GO:0010628)	1/25	0.0332285	0.0404426	0.138825	0.172367	-1.37683	4.68719	CDC28	GO Biological Process 2018
regulation of macromolecule metabolic process (GO:0060255)	1/25	0.0332285	0.0404426	0.138825	0.172367	-1.33873	4.5575	CDC28	GO Biological Process 2018
macromolecular complex assembly (GO:0065003)	1/25	0.0332285	0.0404426	0.138825	0.172367	-1.25169	4.26118	SKP1	GO Biological Process 2018
protein localization to organelle (GO:0033365)	1/26	0.0345353	0.0417583	0.143776	0.177323	-1.25008	4.20748	CDC28	GO Biological Process 2018
double-strand break repair via break-induced replication (GO:0000727)	1/27	0.0358403	0.0427772	0.148699	0.180982	-1.51024	5.0271	MCM5	GO Biological Process 2018
negative regulation of chromatin silencing (GO:0031936)	1/27	0.0358403	0.0427772	0.148699	0.180982	-1.44615	4.81377	MCM5	GO Biological Process 2018
vacuolar acidification (GO:0007035)	1/28	0.0371437	0.0432175	0.153594	0.182147	-1.45665	4.79668	SKP1	GO Biological Process 2018
intracellular pH reduction (GO:0051452)	1/28	0.0371437	0.0432175	0.153594	0.182147	-1.41372	4.65532	SKP1	GO Biological Process 2018
regulation of chromatin silencing at telomere (GO:0031938)	1/28	0.0371437	0.0432175	0.153594	0.182147	-1.1886	3.91401	MCM5	GO Biological Process 2018
cellular response to osmotic stress (GO:0071470)	1/28	0.0371437	0.0432175	0.153594	0.182147	-1.17814	3.87956	CDC14	GO Biological Process 2018
regulation of protein localization (GO:0032880)	1/29	0.0384454	0.0444525	0.158463	0.186724	-1.19941	3.90829	PHO85	GO Biological Process 2018
double-strand break repair via nonhomologous end joining (GO:0006303)	1/30	0.0397454	0.0451098	0.163304	0.188821	-1.33	4.2896	CDC28	GO Biological Process 2018
cellular macromolecular complex assembly (GO:0034622)	1/30	0.0397454	0.0451098	0.163304	0.188821	-1.28809	4.15443	SKP1	GO Biological Process 2018
regulation of cell size (GO:0008361)	1/30	0.0397454	0.0451098	0.163304	0.188821	-1.24192	4.00552	WHI5	GO Biological Process 2018
non-recombinational repair (GO:0000726)	1/32	0.0423403	0.0477619	0.172907	0.198682	-1.33991	4.23682	CDC28	GO Biological Process 2018
negative regulation of gene expression (GO:0010629)	1/33	0.0436352	0.0483384	0.177669	0.200419	-1.25669	3.93581	CDC28	GO Biological Process 2018
[truncated: 1,726 more rows]
