# Supplementary material for: TimeNexus: A Novel Cytoscape App to Analyze Time-Series Data Using Temporal MultiLayer Networks (tMLNs)
Source: Research Square preprint supplement (doi:10.21203/rs.3.rs-133258/v1), 2020-12-31
Supplement: Supplementary file 2 [file b3de1ea91d88560e5521f5d9.xlsx]

## Sheet: Notes on suppl. Table S6
TimeNexus: a novel Cytoscape app to analyze time-series data using temporal MultiLayer Networks (tMLNs)
Michaël Pierrelée 1, Ana Reynders 2, Fabrice Lopez 3, Aziz Moqrich 2, Laurent Tichit 4 and Bianca H. Habermann 1
Supplementary Table with Information on the KEGG core cell cycle tables for TimeNexus, as well as enrichment of resulting active subnetworks using modEnrichr
a. node table uploaded to TimeNexus for building the yeast interactome tMLN for the first full cell cycle
b. intra-layer edge table uploaded to TimeNexus for building the yeast interactome tMLN for the first full cell cycle
c. inter-layer edge table uploaded to TimeNexus for building the yeast interactome tMLN for the first full cell cycle

## Sheet: a. node table Sc. Cell Cycle
Node	Core	Weight_1	Weight_2	Weight_3	Weight_4	Weight_5	Weight_6	Weight_7	Weight_8	Weight_9	Weight_10	Weight_11	Weight_12	Weight_13	Weight_14	Weight_15	Weight_16	Query_1	Query_2	Query_3	Query_4	Query_5	Query_6	Query_7	Query_8	Query_9	Query_10	Query_11	Query_12	Query_13	Query_14	Query_15	Query_16
YGL068W	FALSE	0.0180134	0.00642288	0.0277151	0.0343304	0.0449642	0.0581595	0.0295128	0.0270449	0.0483392	0.0181887	0.0648592	0.0343933	0.0378275	0.025643	0.0266717	0.0208937	FALSE	FALSE	FALSE	FALSE	FALSE	FALSE	FALSE	FALSE	FALSE	FALSE	FALSE	FALSE	FALSE	FALSE	FALSE	FALSE
YIL153W	FALSE	0.00600083	0.0139838	0.0279591	0.040443	0.0165198	0.0479157	0.0555905	0.0174197	0.0144349	0.141007	0.0516441	0.0636265	0.0725728	0.0738142	0.0810987	0.0473797	FALSE	FALSE	FALSE	FALSE	FALSE	FALSE	FALSE	FALSE	FALSE	FALSE	FALSE	FALSE	FALSE	FALSE	FALSE	FALSE
YPR018W	FALSE	0.233987	0.157315	0.0572689	0.116276	0.1934	0.306084	0.393046	0.306246	0.21524	0.13511	0.0895158	0.185602	0.213146	0.17166	0.127704	0.108223	FALSE	FALSE	FALSE	FALSE	FALSE	TRUE	TRUE	TRUE	FALSE	FALSE	FALSE	FALSE	FALSE	FALSE	FALSE	FALSE
YGR161W-C	FALSE	0.0146803	0.0339974	0.0492789	0.0431654	0.0939742	0.0534868	0.0340765	0.00904521	0.00463419	0.0945564	0.0588404	0.0694157	0.0458318	0.0305207	0.0101607	0.0523624	FALSE	FALSE	FALSE	FALSE	FALSE	FALSE	FALSE	FALSE	FALSE	FALSE	FALSE	FALSE	FALSE	FALSE	FALSE	FALSE
YBR121C	FALSE	0.00926295	0.0243209	0.0492384	0.0646837	0.0396058	0.0430894	0.0201956	0.0386181	0.0239079	0.0693943	0.0482621	0.0252205	0.00950053	0.0349068	0.0347406	0.0171443	FALSE	FALSE	FALSE	FALSE	FALSE	FALSE	FALSE	FALSE	FALSE	FALSE	FALSE	FALSE	FALSE	FALSE	FALSE	FALSE
YHL003C	FALSE	0.0289739	0.0448878	0.0513018	0.0358193	0.041973	0.00897047	0.0100032	0.0127295	0.00612463	0.0717302	0.0559347	0.0387011	0.012325	0.00692907	0.00362945	0.0306186	FALSE	FALSE	FALSE	FALSE	FALSE	FALSE	FALSE	FALSE	FALSE	FALSE	FALSE	FALSE	FALSE	FALSE	FALSE	FALSE
YLR014C	FALSE	0.0787358	0.0566291	0.0287909	0.0733727	0.0751815	0.0584647	0.0553434	0.00596245	0.011572	0.0618851	0.0638096	0.0261598	0.045843	0.0858042	0.0755417	0.0617045	FALSE	FALSE	FALSE	FALSE	FALSE	FALSE	FALSE	FALSE	FALSE	FALSE	FALSE	FALSE	FALSE	FALSE	FALSE	FALSE
YIR025W	FALSE	0.0332504	0.0301164	0.0176771	0.0574283	0.0497844	0.105372	0.00129137	0.00182925	0.0334919	0.0183438	0.0916836	0.0756913	0.0693162	0.0280265	0.0485865	0.0159923	FALSE	FALSE	FALSE	FALSE	FALSE	FALSE	FALSE	FALSE	FALSE	FALSE	FALSE	FALSE	FALSE	FALSE	FALSE	FALSE
YOR118W	FALSE	0.00574703	0.0171365	0.0317754	0.0266071	0.00677969	0.0290313	0.0118476	0.019878	0.0398578	0.0226585	0.0115525	0.0450787	0.0276827	0.0134612	0.0123252	0.0171777	FALSE	FALSE	FALSE	FALSE	FALSE	FALSE	FALSE	FALSE	FALSE	FALSE	FALSE	FALSE	FALSE	FALSE	FALSE	FALSE
YOR349W	FALSE	0.00395346	0.0211387	0.00825143	0.0475745	0.0258449	0.0630072	0.0115339	0.0264897	0.0129116	0.0163422	0.0258411	0.0682154	0.0423152	0.00129576	0.00833344	0.00721807	FALSE	FALSE	FALSE	FALSE	FALSE	FALSE	FALSE	FALSE	FALSE	FALSE	FALSE	FALSE	FALSE	FALSE	FALSE	FALSE
YDR013W	FALSE	0.147197	0.105092	0.0964363	0.0596194	0.00215342	0.080299	0.140147	0.143716	0.172566	0.0875717	0.0262619	0.0201151	0.0123504	0.0406339	0.0315153	0.00348079	FALSE	FALSE	FALSE	FALSE	FALSE	FALSE	FALSE	FALSE	FALSE	FALSE	FALSE	FALSE	FALSE	FALSE	FALSE	FALSE
YLR051C	FALSE	0.0297628	0.0105678	0.0322259	0.0570624	0.0275645	0.0246362	0.0915717	0.0274401	0.0099837	0.009228	0.126452	0.0582782	0.039617	0.0129646	0.0108116	0.0255074	FALSE	FALSE	FALSE	FALSE	FALSE	FALSE	FALSE	FALSE	FALSE	FALSE	FALSE	FALSE	FALSE	FALSE	FALSE	FALSE
YDR248C	FALSE	0.0455469	0.00347988	0.0398309	0.126016	0.115343	0.129197	0.117283	0.0127264	0.0188778	0.0203529	0.0217151	0.0638559	0.0655107	0.0963144	0.103445	0.0741982	FALSE	FALSE	FALSE	FALSE	FALSE	FALSE	FALSE	FALSE	FALSE	FALSE	FALSE	FALSE	FALSE	FALSE	FALSE	FALSE
YOR086C	FALSE	0.0423201	0.0416846	0.07754	0.0588868	0.0113696	0.0360037	0.0528303	0.0264664	0.00737999	0.0047106	0.0207605	0.0565024	0.0645691	0.0586762	0.0625325	0.0601144	FALSE	FALSE	FALSE	FALSE	FALSE	FALSE	FALSE	FALSE	FALSE	FALSE	FALSE	FALSE	FALSE	FALSE	FALSE	FALSE
YGR223C	FALSE	0.0505093	0.0213104	0.0315566	0.034197	0.0472718	0.0228662	0.0525402	0.0540686	0.0308141	0.0667054	0.0631609	0.00886139	0.00326056	0.011401	0.0131388	0.0221018	FALSE	FALSE	FALSE	FALSE	FALSE	FALSE	FALSE	FALSE	FALSE	FALSE	FALSE	FALSE	FALSE	FALSE	FALSE	FALSE
YDR371W	FALSE	0.0203105	0.00507276	0.0253285	0.00404892	0.0317588	0.0460329	0.0407226	0.0206515	0.00911533	0.02763	0.0542429	0.0159737	0.0113163	0.0176928	0.0118992	0.0109064	FALSE	FALSE	FALSE	FALSE	FALSE	FALSE	FALSE	FALSE	FALSE	FALSE	FALSE	FALSE	FALSE	FALSE	FALSE	FALSE
YNR009W	FALSE	0.110657	0.133805	0.281053	0.319588	0.308683	0.274	0.176046	0.0263632	0.179271	0.424425	0.283503	0.346104	0.205819	0.140246	0.0844721	0.00798667	FALSE	FALSE	TRUE	TRUE	TRUE	TRUE	FALSE	FALSE	FALSE	TRUE	TRUE	TRUE	FALSE	FALSE	FALSE	FALSE
YGR048W	FALSE	0.044724	0.0818026	0.0894533	0.103826	0.0683514	0.0592191	0.0453557	0.0281701	0.0406049	0.0736143	0.111075	0.0820916	0.0619915	0.0675322	0.0522294	0.0421029	FALSE	FALSE	FALSE	FALSE	FALSE	FALSE	FALSE	FALSE	FALSE	FALSE	FALSE	FALSE	FALSE	FALSE	FALSE	FALSE
YNL315C	FALSE	0.00831782	0.0113367	0.0337003	0.0770463	0.109906	0.112101	0.0818891	0.0609634	0.0222765	0.0689489	0.0920743	0.070823	0.0821861	0.0335523	0.0441292	0.03826	FALSE	FALSE	FALSE	FALSE	FALSE	FALSE	FALSE	FALSE	FALSE	FALSE	FALSE	FALSE	FALSE	FALSE	FALSE	FALSE
YJL022W	FALSE	0.0906544	0.0250068	0.0188716	0.0882925	0.00990477	0.106292	0.0758642	0.00751548	0.00439672	0.157217	0.00193245	0.0538836	0.0134114	0.00311745	0.0109825	0.00260527	FALSE	FALSE	FALSE	FALSE	FALSE	FALSE	FALSE	FALSE	FALSE	FALSE	FALSE	FALSE	FALSE	FALSE	FALSE	FALSE
YLR233C	FALSE	0.228177	0.131386	0.137611	0.0520891	0.0212937	0.0950361	0.141574	0.199416	0.181263	0.114553	0.0162997	0.0480054	0.00679439	0.0213742	0.0404298	0.0218385	FALSE	FALSE	FALSE	FALSE	FALSE	FALSE	FALSE	FALSE	FALSE	FALSE	FALSE	FALSE	FALSE	FALSE	FALSE	FALSE
YOL113W	FALSE	0.104369	0.127663	0.00119128	0.0459886	0.101678	0.102918	0.0972408	0.113524	0.134479	0.083837	0.0404288	0.0193223	0.0377023	0.108839	0.0799331	0.075545	FALSE	FALSE	FALSE	FALSE	FALSE	FALSE	FALSE	FALSE	FALSE	FALSE	FALSE	FALSE	FALSE	FALSE	FALSE	FALSE
YIL100W	FALSE	0.0103246	0.0602941	0.0526314	0.0968081	0.05688	0.30636	0.193729	0.0897535	0.0547836	0.11342	0.408131	0.0641826	0.179578	0.173838	0.0837255	0.0749269	FALSE	FALSE	FALSE	FALSE	FALSE	TRUE	FALSE	FALSE	FALSE	FALSE	TRUE	FALSE	FALSE	FALSE	FALSE	FALSE
YPR071W	FALSE	0.0520357	0.062798	0.0699908	0.0611094	0.0224648	0.029451	0.054528	0.0358219	0.0710932	0.024893	0.00479491	0.0196076	0.0262433	0.0277178	0.0376626	0.0438888	FALSE	FALSE	FALSE	FALSE	FALSE	FALSE	FALSE	FALSE	FALSE	FALSE	FALSE	FALSE	FALSE	FALSE	FALSE	FALSE
YGL044C	FALSE	0.00449749	0.0210185	0.0644365	0.00307676	0.0559642	0.0484252	0.0317304	0.0244911	0.0403445	0.0247526	0.0480267	0.00877659	0.0610555	0.0290768	0.0372509	0.0167388	FALSE	FALSE	FALSE	FALSE	FALSE	FALSE	FALSE	FALSE	FALSE	FALSE	FALSE	FALSE	FALSE	FALSE	FALSE	FALSE
YAL060W	FALSE	0.159485	0.0959505	0.0751629	0.0134011	0.0815416	0.117297	0.121384	0.109042	0.0589278	0.0124591	0.00935808	0.006033	0.0180378	0.0119439	0.00640771	0.00160454	FALSE	FALSE	FALSE	FALSE	FALSE	FALSE	FALSE	FALSE	FALSE	FALSE	FALSE	FALSE	FALSE	FALSE	FALSE	FALSE
YPR027C	FALSE	0.136319	0.10416	0.0639207	0.00752425	0.00299351	0.0324481	0.0604564	0.0887045	0.129106	0.0788636	0.0348492	0.030431	0.0314806	0.032977	0.0130002	0.0334803	FALSE	FALSE	FALSE	FALSE	FALSE	FALSE	FALSE	FALSE	FALSE	FALSE	FALSE	FALSE	FALSE	FALSE	FALSE	FALSE
YMR086C-A	FALSE	0.021496	0.0335025	0.00437765	0.103272	0.0670023	0.0455134	0.0811634	0.0181979	0.0152359	0.0641471	0.0883737	0.0514182	0.0538445	0.119045	0.00554653	0.00928722	FALSE	FALSE	FALSE	FALSE	FALSE	FALSE	FALSE	FALSE	FALSE	FALSE	FALSE	FALSE	FALSE	FALSE	FALSE	FALSE
YLR274W	TRUE	0.110157	0.0695282	0.273382	0.384193	0.492975	0.506742	0.280381	0.0520977	0.221705	0.351108	0.331506	0.301358	0.259925	0.193409	0.152444	0.0903318	FALSE	FALSE	TRUE	TRUE	TRUE	TRUE	TRUE	FALSE	FALSE	TRUE	TRUE	TRUE	TRUE	FALSE	FALSE	FALSE
YOL132W	FALSE	0.113377	0.162624	0.28087	0.310276	0.0922053	0.0397914	0.0120871	0.100228	0.121625	0.172987	0.201191	0.19051	0.21087	0.044554	0.0428776	0.00757058	FALSE	FALSE	TRUE	TRUE	FALSE	FALSE	FALSE	FALSE	FALSE	FALSE	FALSE	FALSE	FALSE	FALSE	FALSE	FALSE
YLR289W	FALSE	0.0188578	0.0103291	0.131037	0.0174097	0.0555435	0.0669208	0.0651838	0.00667059	0.107313	0.0589833	0.0719584	0.0604028	0.122656	0.0386443	0.0391981	0.0113573	FALSE	FALSE	FALSE	FALSE	FALSE	FALSE	FALSE	FALSE	FALSE	FALSE	FALSE	FALSE	FALSE	FALSE	FALSE	FALSE
YDL207W	FALSE	0.0625645	0.0593918	0.0356446	0.0637022	0.00216819	0.00610393	0.043463	0.0632144	0.030584	0.0234065	0.0433532	0.0174336	0.0138624	0.0606623	0.0197582	0.0437055	FALSE	FALSE	FALSE	FALSE	FALSE	FALSE	FALSE	FALSE	FALSE	FALSE	FALSE	FALSE	FALSE	FALSE	FALSE	FALSE
YGR010W	FALSE	0.0343496	0.0179634	0.00256979	0.0286669	0.0174812	0.0385009	0.0241878	0.0144395	0.0272527	0.00346613	0.0100316	0.021108	0.0348447	0.0114555	0.00862289	0.0408129	FALSE	FALSE	FALSE	FALSE	FALSE	FALSE	FALSE	FALSE	FALSE	FALSE	FALSE	FALSE	FALSE	FALSE	FALSE	FALSE
YLR053C	FALSE	0.21112	0.105449	0.0252799	0.00417836	0.00762914	0.0852256	0.110028	0.0320192	0.0187741	0.0925767	0.154884	0.0273094	0.012133	0.0440507	0.0365906	0.020693	FALSE	FALSE	FALSE	FALSE	FALSE	FALSE	FALSE	FALSE	FALSE	FALSE	FALSE	FALSE	FALSE	FALSE	FALSE	FALSE
YPR017C	FALSE	0.092118	0.065533	0.034256	0.0433676	0.089428	0.132282	0.0990202	0.111647	0.175039	0.042211	0.0368096	0.0633934	0.0197524	0.0801873	0.0931407	0.0753134	FALSE	FALSE	FALSE	FALSE	FALSE	FALSE	FALSE	FALSE	FALSE	FALSE	FALSE	FALSE	FALSE	FALSE	FALSE	FALSE
YGR062C	FALSE	0.0236937	0.0550026	0.121791	0.153055	0.132442	0.152922	0.110689	0.152674	0.0824874	0.0609688	0.156263	0.11534	0.145328	0.158707	0.121546	0.0801904	FALSE	FALSE	FALSE	FALSE	FALSE	FALSE	FALSE	FALSE	FALSE	FALSE	FALSE	FALSE	FALSE	FALSE	FALSE	FALSE
YDL073W	FALSE	0.0180653	0.033251	0.0366108	0.0528487	0.0983733	0.0856363	0.0755738	0.0721838	0.0744093	0.00269279	0.0553693	0.0655853	0.0669839	0.0739902	0.0638888	0.0389179	FALSE	FALSE	FALSE	FALSE	FALSE	FALSE	FALSE	FALSE	FALSE	FALSE	FALSE	FALSE	FALSE	FALSE	FALSE	FALSE
YMR138W	FALSE	0.0796589	0.0029638	0.0256082	0.0299798	0.0410505	0.0753063	0.0224105	0.0711666	0.0804823	0.00479687	0.0200576	0.0321995	0.029065	0.0983534	0.0977337	0.00161802	FALSE	FALSE	FALSE	FALSE	FALSE	FALSE	FALSE	FALSE	FALSE	FALSE	FALSE	FALSE	FALSE	FALSE	FALSE	FALSE
YGL223C	FALSE	0.0123501	0.00125189	0.0188371	0.0379945	0.0026197	0.0230511	0.0178321	0.0579664	0.0153325	0.0395124	0.0065914	0.0157775	0.0405497	0.0277026	0.0446704	0.0267634	FALSE	FALSE	FALSE	FALSE	FALSE	FALSE	FALSE	FALSE	FALSE	FALSE	FALSE	FALSE	FALSE	FALSE	FALSE	FALSE
YOR197W	FALSE	0.00883027	0.00774215	0.00398741	0.00227601	0.0340083	0.0140258	0.031089	0.0447076	0.0391053	0.0246521	0.0373983	0.0102652	0.0193225	0.0440594	0.0329108	0.0131109	FALSE	FALSE	FALSE	FALSE	FALSE	FALSE	FALSE	FALSE	FALSE	FALSE	FALSE	FALSE	FALSE	FALSE	FALSE	FALSE
YGR024C	FALSE	0.02115	0.0511046	0.0602024	0.0327766	0.0339882	0.00247484	0.0238723	0.0111189	0.00358623	0.00161289	0.0278071	0.0127021	0.0578832	0.0233807	0.0331571	0.0240002	FALSE	FALSE	FALSE	FALSE	FALSE	FALSE	FALSE	FALSE	FALSE	FALSE	FALSE	FALSE	FALSE	FALSE	FALSE	FALSE
YJR146W	FALSE	0.0749489	0.0339528	0.0235156	0.0229548	0.0103118	0.0679489	0.0158444	0.0276233	0.00613586	0.00659024	0.0250603	0.10247	0.0742146	0.0505835	0.062707	0.0359704	FALSE	FALSE	FALSE	FALSE	FALSE	FALSE	FALSE	FALSE	FALSE	FALSE	FALSE	FALSE	FALSE	FALSE	FALSE	FALSE
YOL084W	FALSE	0.013301	0.0276939	0.0317431	0.0388814	0.0403283	0.0507925	0.0730202	0.0401616	0.0244915	0.0350917	0.0211188	0.00519411	0.00846233	0.0424207	0.0891999	0.0427704	FALSE	FALSE	FALSE	FALSE	FALSE	FALSE	FALSE	FALSE	FALSE	FALSE	FALSE	FALSE	FALSE	FALSE	FALSE	FALSE
YCR083W	FALSE	0.0470841	0.0371752	0.139464	0.122336	0.168149	0.140371	0.117839	0.0141231	0.0513543	0.0568802	0.239235	0.0580558	0.0764742	0.117352	0.0774581	0.0594233	FALSE	FALSE	FALSE	FALSE	FALSE	FALSE	FALSE	FALSE	FALSE	FALSE	FALSE	FALSE	FALSE	FALSE	FALSE	FALSE
YKL007W	FALSE	0.0865692	0.0270167	0.0686337	0.0352505	0.0730558	0.0496175	0.0783927	0.080275	0.0285426	0.0494059	0.0343032	0.0375105	0.0341134	0.0521975	0.0290661	0.00495474	FALSE	FALSE	FALSE	FALSE	FALSE	FALSE	FALSE	FALSE	FALSE	FALSE	FALSE	FALSE	FALSE	FALSE	FALSE	FALSE
YPR131C	FALSE	0.0241368	0.022672	0.031046	0.00469996	0.00783897	0.0514646	0.0409629	0.00227337	0.0264125	0.0297433	0.0317153	0.00978838	0.0176384	0.0307516	0.00844568	0.013354	FALSE	FALSE	FALSE	FALSE	FALSE	FALSE	FALSE	FALSE	FALSE	FALSE	FALSE	FALSE	FALSE	FALSE	FALSE	FALSE
YPR129W	FALSE	0.048087	0.0424458	0.0230173	0.00175973	0.0126155	0.0616443	0.0349585	0.0269314	0.0125814	0.0135344	0.0643425	0.00255892	0.0255695	0.00456579	0.0292575	0.0320409	FALSE	FALSE	FALSE	FALSE	FALSE	FALSE	FALSE	FALSE	FALSE	FALSE	FALSE	FALSE	FALSE	FALSE	FALSE	FALSE
YER165W	FALSE	0.0149323	0.0392085	0.0613804	0.0831108	0.0532962	0.0621984	0.0241442	0.0448157	0.0356727	0.0505634	0.0437537	0.0478591	0.0193009	0.0616829	0.0529942	0.00617587	FALSE	FALSE	FALSE	FALSE	FALSE	FALSE	FALSE	FALSE	FALSE	FALSE	FALSE	FALSE	FALSE	FALSE	FALSE	FALSE
YLR437C	FALSE	0.111159	0.0120932	0.144204	0.222939	0.24559	0.269987	0.257783	0.182196	0.0140001	0.0480399	0.123885	0.153089	0.129381	0.274206	0.292483	0.0871694	FALSE	FALSE	FALSE	FALSE	FALSE	TRUE	TRUE	FALSE	FALSE	FALSE	FALSE	FALSE	FALSE	TRUE	TRUE	FALSE
YLR251W	FALSE	0.0309053	0.0983871	0.142211	0.11718	0.0930999	0.050157	0.0864119	0.0067661	0.0311467	0.0357333	0.00275506	0.0281687	0.0952814	0.166903	0.112766	0.137164	FALSE	FALSE	FALSE	FALSE	FALSE	FALSE	FALSE	FALSE	FALSE	FALSE	FALSE	FALSE	FALSE	FALSE	FALSE	FALSE
YPR178W	FALSE	0.0428843	0.0743631	0.0186647	0.0439698	0.00779245	0.0352382	0.0264815	0.101898	0.0824477	0.0436522	0.0416833	0.0367405	0.012374	0.0365612	0.0045385	0.00570465	FALSE	FALSE	FALSE	FALSE	FALSE	FALSE	FALSE	FALSE	FALSE	FALSE	FALSE	FALSE	FALSE	FALSE	FALSE	FALSE
YJL129C	FALSE	0.00291731	0.0159165	0.00831203	0.0110759	0.041543	0.0239628	0.00326776	0.0290463	0.0122476	0.0384811	0.0427449	0.0050968	0.0183457	0.0232877	0.00906787	0.015005	FALSE	FALSE	FALSE	FALSE	FALSE	FALSE	FALSE	FALSE	FALSE	FALSE	FALSE	FALSE	FALSE	FALSE	FALSE	FALSE
YML070W	FALSE	0.103595	0.0621433	0.0234821	0.0149753	0.0194315	0.0566778	0.0451614	0.118279	0.0802821	0.071113	0.0328924	0.00757512	0.00239654	0.0281567	0.0367202	0.0570369	FALSE	FALSE	FALSE	FALSE	FALSE	FALSE	FALSE	FALSE	FALSE	FALSE	FALSE	FALSE	FALSE	FALSE	FALSE	FALSE
YLR120C	FALSE	0.158018	0.0955851	0.0424315	0.0357651	0.0406829	0.0609591	0.115275	0.143021	0.145627	0.131101	0.0535804	0.0268236	0.053622	0.0460641	0.0915701	0.0289964	FALSE	FALSE	FALSE	FALSE	FALSE	FALSE	FALSE	FALSE	FALSE	FALSE	FALSE	FALSE	FALSE	FALSE	FALSE	FALSE
YOR151C	FALSE	0.0237259	0.0213737	0.0069014	0.00772807	0.0191078	0.0199974	0.00183193	0.0148645	0.00469155	0.00909942	0.00185073	0.0035025	0.00368187	0.0273999	0.00980516	0.00229576	FALSE	FALSE	FALSE	FALSE	FALSE	FALSE	FALSE	FALSE	FALSE	FALSE	FALSE	FALSE	FALSE	FALSE	FALSE	FALSE
YOR324C	FALSE	0.121	0.0393585	0.0923334	0.0439707	0.00888921	0.0136861	0.0486638	0.0522413	0.0365413	0.03863	0.0317245	0.0234487	0.0231975	0.0445324	0.0180876	0.0337168	FALSE	FALSE	FALSE	FALSE	FALSE	FALSE	FALSE	FALSE	FALSE	FALSE	FALSE	FALSE	FALSE	FALSE	FALSE	FALSE
YIL123W	FALSE	0.0559416	0.15704	0.214732	0.254389	0.215264	0.156035	0.052047	0.0458403	0.211445	0.356336	0.35573	0.275195	0.151584	0.0436389	0.072917	0.128915	FALSE	FALSE	FALSE	TRUE	FALSE	FALSE	FALSE	FALSE	FALSE	TRUE	TRUE	TRUE	FALSE	FALSE	FALSE	FALSE
YHR056C	FALSE	0.0479374	0.0305454	0.0179384	0.0435486	0.0456917	0.0928177	0.112248	0.0492783	0.0284971	0.0301992	0.0211423	0.0311792	0.0493835	0.0207636	0.0489212	0.0252228	FALSE	FALSE	FALSE	FALSE	FALSE	FALSE	FALSE	FALSE	FALSE	FALSE	FALSE	FALSE	FALSE	FALSE	FALSE	FALSE
YFR028C	TRUE	0.0759374	0.0223066	0.0739762	0.100937	0.146588	0.133821	0.105579	0.0590679	0.0246002	0.0382561	0.063469	0.0632541	0.121998	0.0780755	0.0477737	0.0581029	FALSE	FALSE	FALSE	FALSE	FALSE	FALSE	FALSE	FALSE	FALSE	FALSE	FALSE	FALSE	FALSE	FALSE	FALSE	FALSE
YPL055C	FALSE	0.104954	0.0810953	0.0918264	0.0888206	0.00516253	0.0235455	0.0562231	0.0133737	0.0271267	0.159814	0.0513548	0.0835728	0.0320103	0.0464016	0.00719602	0.0210218	FALSE	FALSE	FALSE	FALSE	FALSE	FALSE	FALSE	FALSE	FALSE	FALSE	FALSE	FALSE	FALSE	FALSE	FALSE	FALSE
YBR222C	FALSE	0.0306816	0.0162644	0.00110431	0.0172099	0.0431562	0.0156411	0.0724002	0.0670139	0.0484202	0.0307145	0.0422045	0.047055	0.0295888	0.0330042	0.00111306	0.00482265	FALSE	FALSE	FALSE	FALSE	FALSE	FALSE	FALSE	FALSE	FALSE	FALSE	FALSE	FALSE	FALSE	FALSE	FALSE	FALSE
YBR220C	FALSE	0.0135544	0.0674322	0.104677	0.0711052	0.0460873	0.00485493	0.00383018	0.022663	0.00380835	0.00416767	0.0762653	0.0339723	0.0391542	0.0766446	0.0151868	0.0420871	FALSE	FALSE	FALSE	FALSE	FALSE	FALSE	FALSE	FALSE	FALSE	FALSE	FALSE	FALSE	FALSE	FALSE	FALSE	FALSE
YNL253W	FALSE	0.0290471	0.0388557	0.0251971	0.0334368	0.0523135	0.0998805	0.0547493	0.0523476	0.034252	0.13841	0.0903434	0.0613844	0.0357834	0.0648115	0.0419422	0.0138928	FALSE	FALSE	FALSE	FALSE	FALSE	FALSE	FALSE	FALSE	FALSE	FALSE	FALSE	FALSE	FALSE	FALSE	FALSE	FALSE
YDL111C	FALSE	0.00432129	0.00605146	0.0108764	0.00447619	0.0160723	0.00522933	0.0259032	0.0464491	0.0379748	0.00654526	0.0380893	0.0201568	0.0262898	0.0118385	0.0209132	0.00917414	FALSE	FALSE	FALSE	FALSE	FALSE	FALSE	FALSE	FALSE	FALSE	FALSE	FALSE	FALSE	FALSE	FALSE	FALSE	FALSE
YBL061C	FALSE	0.0544998	0.0253522	0.0184989	0.0851354	0.0799452	0.0849406	0.102124	0.081223	0.0867575	0.0326386	0.045791	0.0491772	0.0542352	0.0947172	0.0805373	0.0344822	FALSE	FALSE	FALSE	FALSE	FALSE	FALSE	FALSE	FALSE	FALSE	FALSE	FALSE	FALSE	FALSE	FALSE	FALSE	FALSE
YDL042C	FALSE	0.094235	0.0691879	0.0737405	0.0355633	0.0173464	0.00330035	0.0416693	0.0672366	0.02521	0.00502865	0.0351886	0.0827186	0.0269175	0.0204132	0.016024	0.0171458	FALSE	FALSE	FALSE	FALSE	FALSE	FALSE	FALSE	FALSE	FALSE	FALSE	FALSE	FALSE	FALSE	FALSE	FALSE	FALSE
YOL016C	FALSE	0.0271566	0.0411736	0.0820799	0.12073	0.122455	0.0900352	0.106146	0.0835218	0.047715	0.0325107	0.0744316	0.1093	0.114048	0.112282	0.0807758	0.0737875	FALSE	FALSE	FALSE	FALSE	FALSE	FALSE	FALSE	FALSE	FALSE	FALSE	FALSE	FALSE	FALSE	FALSE	FALSE	FALSE
YDL059C	FALSE	0.101132	0.0518602	0.00824591	0.0775447	0.0759225	0.00429038	0.0463986	0.0168698	0.0558219	0.033494	0.0116799	0.0474141	0.0155574	0.0562761	0.0720367	0.0288003	FALSE	FALSE	FALSE	FALSE	FALSE	FALSE	FALSE	FALSE	FALSE	FALSE	FALSE	FALSE	FALSE	FALSE	FALSE	FALSE
YJR007W	FALSE	0.0228084	0.019944	0.00924851	0.0826817	0.0534927	0.0579868	0.0116542	0.0500849	0.0587772	0.0540255	0.0323672	0.0514701	0.032018	0.00830507	0.020219	0.024293	FALSE	FALSE	FALSE	FALSE	FALSE	FALSE	FALSE	FALSE	FALSE	FALSE	FALSE	FALSE	FALSE	FALSE	FALSE	FALSE
YGL167C	FALSE	0.0500385	0.0214554	0.0375135	0.0191191	0.0135051	0.0468677	0.0521182	0.0372348	0.0365649	0.0335752	0.0038019	0.0215456	0.0146587	0.0438072	0.0383596	0.0262172	FALSE	FALSE	FALSE	FALSE	FALSE	FALSE	FALSE	FALSE	FALSE	FALSE	FALSE	FALSE	FALSE	FALSE	FALSE	FALSE
YNL233W	FALSE	0.298177	0.216191	0.130146	0.0237729	0.093199	0.163914	0.231834	0.360924	0.177215	0.179803	0.0705752	0.0597832	0.080154	0.09039	0.0496167	0.0273453	TRUE	FALSE	FALSE	FALSE	FALSE	FALSE	FALSE	TRUE	FALSE	FALSE	FALSE	FALSE	FALSE	FALSE	FALSE	FALSE
YLL002W	FALSE	0.228412	0.168814	0.166495	0.0841604	0.0404262	0.0725002	0.13619	0.327184	0.202937	0.219696	0.0480383	0.013267	0.0210344	0.00175256	0.0304323	0.0312062	FALSE	FALSE	FALSE	FALSE	FALSE	FALSE	FALSE	TRUE	FALSE	FALSE	FALSE	FALSE	FALSE	FALSE	FALSE	FALSE
YGR289C	FALSE	0.0170307	0.0734682	0.229998	0.167601	0.177141	0.127194	0.014439	0.0693832	0.143587	0.109725	0.10381	0.100324	0.140428	0.0736682	0.0672919	0.0310174	FALSE	FALSE	FALSE	FALSE	FALSE	FALSE	FALSE	FALSE	FALSE	FALSE	FALSE	FALSE	FALSE	FALSE	FALSE	FALSE
YJL008C	FALSE	0.0125028	0.00426536	0.0235471	0.0153985	0.00353421	0.0109244	0.0142654	0.0380752	0.0377179	0.0214398	0.0137944	0.00997399	0.00122643	0.0237049	0.0180067	0.00898472	FALSE	FALSE	FALSE	FALSE	FALSE	FALSE	FALSE	FALSE	FALSE	FALSE	FALSE	FALSE	FALSE	FALSE	FALSE	FALSE
YBR003W	FALSE	0.0791806	0.0609444	0.042451	0.0553879	0.0316088	0.0300384	0.0369192	0.026988	0.028941	0.0335149	0.0840186	0.0461921	0.030804	0.067459	0.0456792	0.0381846	FALSE	FALSE	FALSE	FALSE	FALSE	FALSE	FALSE	FALSE	FALSE	FALSE	FALSE	FALSE	FALSE	FALSE	FALSE	FALSE
YBR180W	FALSE	0.159687	0.158077	0.153212	0.021984	0.159217	0.150064	0.218224	0.180077	0.154656	0.246232	0.102876	0.0407833	0.0112856	0.149386	0.101086	0.091083	FALSE	FALSE	FALSE	FALSE	FALSE	FALSE	FALSE	FALSE	FALSE	FALSE	FALSE	FALSE	FALSE	FALSE	FALSE	FALSE
YHR102W	FALSE	0.0621175	0.037202	0.01793	0.0210609	0.0624833	0.0389281	0.00396135	0.0151154	0.072133	0.0465367	0.0549415	0.0213666	0.00372406	0.00370167	0.0405625	0.0601768	FALSE	FALSE	FALSE	FALSE	FALSE	FALSE	FALSE	FALSE	FALSE	FALSE	FALSE	FALSE	FALSE	FALSE	FALSE	FALSE
YJL050W	FALSE	0.0276163	0.0410651	0.0764938	0.058949	0.0777191	0.0740648	0.0315915	0.0417093	0.0075288	0.033845	0.0764114	0.0392956	0.0502093	0.0961928	0.0624122	0.0426915	FALSE	FALSE	FALSE	FALSE	FALSE	FALSE	FALSE	FALSE	FALSE	FALSE	FALSE	FALSE	FALSE	FALSE	FALSE	FALSE
YDR083W	FALSE	0.0254283	0.0292514	0.0308805	0.00374357	0.0139157	0.013843	0.0376421	0.057484	0.0464108	0.0380289	0.0348439	0.0339911	0.00538444	0.096332	0.0903352	0.0504178	FALSE	FALSE	FALSE	FALSE	FALSE	FALSE	FALSE	FALSE	FALSE	FALSE	FALSE	FALSE	FALSE	FALSE	FALSE	FALSE
YEL009C	FALSE	0.0300522	0.00460621	0.0236324	0.0486939	0.0351409	0.0219309	0.00101544	0.00736789	0.0194158	0.0468379	0.0248649	0.0495808	0.0368417	0.0247165	0.0140339	0.0193086	FALSE	FALSE	FALSE	FALSE	FALSE	FALSE	FALSE	FALSE	FALSE	FALSE	FALSE	FALSE	FALSE	FALSE	FALSE	FALSE
YHR149C	FALSE	0.270859	0.159761	0.119561	0.00653685	0.0729949	0.167837	0.20741	0.283294	0.219063	0.124536	0.00489618	0.0589705	0.0403113	0.09788	0.0677224	0.00924377	TRUE	FALSE	FALSE	FALSE	FALSE	FALSE	FALSE	TRUE	FALSE	FALSE	FALSE	FALSE	FALSE	FALSE	FALSE	FALSE
YNL049C	FALSE	0.0175722	0.0244974	0.061914	0.0617329	0.0468692	0.0621794	0.0499744	0.0197796	0.0198936	0.0190099	0.0361972	0.0428893	0.0367123	0.00786674	0.00327775	0.00731247	FALSE	FALSE	FALSE	FALSE	FALSE	FALSE	FALSE	FALSE	FALSE	FALSE	FALSE	FALSE	FALSE	FALSE	FALSE	FALSE
YHR073W	FALSE	0.0371543	0.0302817	0.0490824	0.0451138	0.00783943	0.0179024	0.0167786	0.0348277	0.0291746	0.0102133	0.0372957	0.0263862	0.014249	0.0160304	0.0241812	0.0180311	FALSE	FALSE	FALSE	FALSE	FALSE	FALSE	FALSE	FALSE	FALSE	FALSE	FALSE	FALSE	FALSE	FALSE	FALSE	FALSE
YPL176C	FALSE	0.0142048	0.00236082	0.0383875	0.0305262	0.0074793	0.00919414	0.00554514	0.0182199	0.00738986	0.0254502	0.019684	0.0089299	0.028335	0.0346779	0.00960961	0.0141746	FALSE	FALSE	FALSE	FALSE	FALSE	FALSE	FALSE	FALSE	FALSE	FALSE	FALSE	FALSE	FALSE	FALSE	FALSE	FALSE
YAL019W	FALSE	0.0908743	0.0654294	0.0731048	0.0228814	0.00169554	0.0335441	0.0048392	0.0129044	0.036452	0.0235086	0.0403012	0.00175548	0.0236455	0.0335397	0.0250737	0.0787258	FALSE	FALSE	FALSE	FALSE	FALSE	FALSE	FALSE	FALSE	FALSE	FALSE	FALSE	FALSE	FALSE	FALSE	FALSE	FALSE
YKL172W	FALSE	0.00713034	0.0194065	0.026033	0.0541267	0.0553774	0.0323488	0.0355371	0.0483734	0.0270719	0.00889658	0.001075	0.0858128	0.0807694	0.0292765	0.0464482	0.0293317	FALSE	FALSE	FALSE	FALSE	FALSE	FALSE	FALSE	FALSE	FALSE	FALSE	FALSE	FALSE	FALSE	FALSE	FALSE	FALSE
YMR169C	FALSE	0.0217128	0.0286057	0.184706	0.158255	0.144239	0.131068	0.0756401	0.0155119	0.0359903	0.0343912	0.0388518	0.0761283	0.152126	0.0307214	0.181888	0.143021	FALSE	FALSE	FALSE	FALSE	FALSE	FALSE	FALSE	FALSE	FALSE	FALSE	FALSE	FALSE	FALSE	FALSE	FALSE	FALSE
YNR032C-A	FALSE	0.0506844	0.0254496	0.0570923	0.0148442	0.0263381	0.0693413	0.0511743	0.00233112	0.126806	0.0129242	0.0667818	0.00700655	0.0833424	0.0104008	0.0192045	0.0121677	FALSE	FALSE	FALSE	FALSE	FALSE	FALSE	FALSE	FALSE	FALSE	FALSE	FALSE	FALSE	FALSE	FALSE	FALSE	FALSE
YDR468C	FALSE	0.0548156	0.0372001	0.0366305	0.0392623	0.0106482	0.0245973	0.0320129	0.0567793	0.0509857	0.00369557	0.0398582	0.0246518	0.0158563	0.0270337	0.00711301	0.0117034	FALSE	FALSE	FALSE	FALSE	FALSE	FALSE	FALSE	FALSE	FALSE	FALSE	FALSE	FALSE	FALSE	FALSE	FALSE	FALSE
YDL103C	FALSE	0.152211	0.137234	0.148863	0.0519189	0.0409731	0.137466	0.13999	0.173912	0.138543	0.128911	0.130574	0.033316	0.0675184	0.0347002	0.0254846	0.0654333	FALSE	FALSE	FALSE	FALSE	FALSE	FALSE	FALSE	FALSE	FALSE	FALSE	FALSE	FALSE	FALSE	FALSE	FALSE	FALSE
YHR090C	FALSE	0.0635898	0.0864667	0.00649657	0.0504909	0.0662557	0.0498074	0.00680324	0.0016144	0.0293284	0.0925232	0.160512	0.0409226	0.0113898	0.0541745	0.0191959	0.0126375	FALSE	FALSE	FALSE	FALSE	FALSE	FALSE	FALSE	FALSE	FALSE	FALSE	FALSE	FALSE	FALSE	FALSE	FALSE	FALSE
YMR205C	FALSE	0.0436818	0.0145602	0.037478	0.00537854	0.0247181	0.060289	0.0676975	0.052957	0.0340088	0.0235505	0.0281494	0.0371103	0.0167798	0.0149304	0.0115153	0.00224133	FALSE	FALSE	FALSE	FALSE	FALSE	FALSE	FALSE	FALSE	FALSE	FALSE	FALSE	FALSE	FALSE	FALSE	FALSE	FALSE
YFR049W	FALSE	0.0563495	0.156955	0.224222	0.199307	0.213299	0.168542	0.0972783	0.0643663	0.124447	0.172403	0.178419	0.132808	0.141891	0.0990161	0.117473	0.133164	FALSE	FALSE	FALSE	FALSE	FALSE	FALSE	FALSE	FALSE	FALSE	FALSE	FALSE	FALSE	FALSE	FALSE	FALSE	FALSE
YML034W	FALSE	0.432677	0.254804	0.146708	0.0433512	0.158723	0.237327	0.280301	0.431071	0.383431	0.274374	0.0975296	0.00219791	0.0777318	0.164054	0.191939	0.183852	TRUE	TRUE	FALSE	FALSE	FALSE	FALSE	TRUE	TRUE	TRUE	TRUE	FALSE	FALSE	FALSE	FALSE	FALSE	FALSE
YIR004W	FALSE	0.0504187	0.0606559	0.0414925	0.0504027	0.0605992	0.0416914	0.074174	0.00537499	0.00186183	0.013733	0.099687	0.0790757	0.0508051	0.0535804	0.0513948	0.0340343	FALSE	FALSE	FALSE	FALSE	FALSE	FALSE	FALSE	FALSE	FALSE	FALSE	FALSE	FALSE	FALSE	FALSE	FALSE	FALSE
YFL032W	FALSE	0.0566054	0.0279517	0.152487	0.0143263	0.0641457	0.0932027	0.0879383	0.0322041	0.689697	0.232812	0.160231	0.105863	0.0211217	0.17788	0.201235	0.11534	FALSE	FALSE	FALSE	FALSE	FALSE	FALSE	FALSE	FALSE	TRUE	FALSE	FALSE	FALSE	FALSE	FALSE	FALSE	FALSE
Q0045	FALSE	0.291036	0.16038	0.480435	0.267697	0.255483	0.183285	0.251203	0.171977	0.046086	0.233377	0.0363553	0.126025	0.167328	0.137821	0.0924165	0.0634736	TRUE	FALSE	TRUE	TRUE	TRUE	FALSE	TRUE	FALSE	FALSE	FALSE	FALSE	FALSE	FALSE	FALSE	FALSE	FALSE
YNR008W	FALSE	0.0698394	0.0687084	0.121023	0.059392	0.0727951	0.0149544	0.0601355	0.0533674	0.0718517	0.0837311	0.0010808	0.0418015	0.0419389	0.0438341	0.0159221	0.0270726	FALSE	FALSE	FALSE	FALSE	FALSE	FALSE	FALSE	FALSE	FALSE	FALSE	FALSE	FALSE	FALSE	FALSE	FALSE	FALSE
YCR034W	FALSE	0.028203	0.0810001	0.0583561	0.12001	0.0603435	0.0123139	0.00914349	0.0366372	0.0493346	0.0839233	0.057162	0.0738508	0.063912	0.0182703	0.0190318	0.0345424	FALSE	FALSE	FALSE	FALSE	FALSE	FALSE	FALSE	FALSE	FALSE	FALSE	FALSE	FALSE	FALSE	FALSE	FALSE	FALSE
YBR168W	FALSE	0.0253537	0.0289433	0.0248541	0.0045987	0.0614701	0.0595678	0.0041666	0.0169283	0.0455816	0.0355693	0.00454237	0.0173913	0.0124399	0.00529307	0.00436818	0.00661264	FALSE	FALSE	FALSE	FALSE	FALSE	FALSE	FALSE	FALSE	FALSE	FALSE	FALSE	FALSE	FALSE	FALSE	FALSE	FALSE
YLR403W	FALSE	0.0199756	0.00858089	0.0460984	0.0346678	0.0188394	0.0205103	0.0412248	0.0204943	0.00411687	0.00421516	0.0358277	0.0117159	0.0351563	0.0268135	0.0042206	0.00442389	FALSE	FALSE	FALSE	FALSE	FALSE	FALSE	FALSE	FALSE	FALSE	FALSE	FALSE	FALSE	FALSE	FALSE	FALSE	FALSE
YGR118W	FALSE	0.0286894	0.0351602	0.0486469	0.00512097	0.0516637	0.031313	0.0117801	0.00337598	0.0391192	0.0478635	0.101184	0.0424334	0.0554226	0.0234384	0.00464497	0.0410844	FALSE	FALSE	FALSE	FALSE	FALSE	FALSE	FALSE	FALSE	FALSE	FALSE	FALSE	FALSE	FALSE	FALSE	FALSE	FALSE
YGR260W	FALSE	0.0363759	0.00693796	0.0130466	0.036693	0.0145238	0.0317756	0.051527	0.0265774	0.00105304	0.0114794	0.0358766	0.00734204	0.034068	0.00656895	0.024537	0.0258117	FALSE	FALSE	FALSE	FALSE	FALSE	FALSE	FALSE	FALSE	FALSE	FALSE	FALSE	FALSE	FALSE	FALSE	FALSE	FALSE
YIL128W	FALSE	0.0176699	0.0035965	0.030299	0.0727405	0.0755126	0.0976778	0.0634458	0.0162795	0.0105997	0.0652733	0.0743818	0.0372694	0.027369	0.0204642	0.0613414	0.0206821	FALSE	FALSE	FALSE	FALSE	FALSE	FALSE	FALSE	FALSE	FALSE	FALSE	FALSE	FALSE	FALSE	FALSE	FALSE	FALSE
YEL077C	FALSE	0.174131	0.13857	0.0361697	0.240043	0.167721	0.39056	0.290683	0.230852	0.230393	0.0185731	0.108487	0.231636	0.25593	0.214958	0.123158	0.0754448	FALSE	FALSE	FALSE	FALSE	FALSE	TRUE	TRUE	FALSE	FALSE	FALSE	FALSE	FALSE	TRUE	FALSE	FALSE	FALSE
YPL019C	FALSE	0.121493	0.0891862	0.0939909	0.0166997	0.0238276	0.0645805	0.0694427	0.0703541	0.0953845	0.0574901	0.00162944	0.0355183	0.0360893	0.0120735	0.0224585	0.00274377	FALSE	FALSE	FALSE	FALSE	FALSE	FALSE	FALSE	FALSE	FALSE	FALSE	FALSE	FALSE	FALSE	FALSE	FALSE	FALSE
YKR037C	FALSE	0.0332674	0.0946965	0.174422	0.141569	0.138218	0.123285	0.036127	0.0169788	0.086814	0.0965359	0.0879422	0.128596	0.159362	0.0692422	0.055336	0.00254737	FALSE	FALSE	FALSE	FALSE	FALSE	FALSE	FALSE	FALSE	FALSE	FALSE	FALSE	FALSE	FALSE	FALSE	FALSE	FALSE
YGL009C	FALSE	0.0206132	0.0114815	0.0345015	0.113077	0.119645	0.142875	0.10683	0.0321967	0.00222654	0.0519076	0.0673066	0.0487975	0.0507851	0.0996452	0.107233	0.0805076	FALSE	FALSE	FALSE	FALSE	FALSE	FALSE	FALSE	FALSE	FALSE	FALSE	FALSE	FALSE	FALSE	FALSE	FALSE	FALSE
YNL206C	FALSE	0.158992	0.110432	0.114322	0.00494939	0.0134294	0.0514791	0.0723602	0.106693	0.102818	0.103509	0.0978698	0.0167594	0.00764384	0.0013351	0.00160521	0.0208246	FALSE	FALSE	FALSE	FALSE	FALSE	FALSE	FALSE	FALSE	FALSE	FALSE	FALSE	FALSE	FALSE	FALSE	FALSE	FALSE
YGL159W	FALSE	0.00939156	0.00553795	0.029801	0.0528472	0.0225546	0.0527869	0.0375457	0.0415452	0.0499531	0.014243	0.0238484	0.018353	0.00752719	0.0166167	0.00145742	0.0045211	FALSE	FALSE	FALSE	FALSE	FALSE	FALSE	FALSE	FALSE	FALSE	FALSE	FALSE	FALSE	FALSE	FALSE	FALSE	FALSE
YGR196C	FALSE	0.0931981	0.0758667	0.0083204	0.0460321	0.0129774	0.0355444	0.0209301	0.0267485	0.0239561	0.0277251	0.0278395	0.0243779	0.0218315	0.00764853	0.00550214	0.00263509	FALSE	FALSE	FALSE	FALSE	FALSE	FALSE	FALSE	FALSE	FALSE	FALSE	FALSE	FALSE	FALSE	FALSE	FALSE	FALSE
YIL107C	FALSE	0.0535757	0.0682823	0.0110895	0.0295611	0.0274609	0.0194397	0.012231	0.0387249	0.0013517	0.0301654	0.0317749	0.0187603	0.0276803	0.0378953	0.0129198	0.0517173	FALSE	FALSE	FALSE	FALSE	FALSE	FALSE	FALSE	FALSE	FALSE	FALSE	FALSE	FALSE	FALSE	FALSE	FALSE	FALSE
YMR293C	FALSE	0.0155454	0.0143393	0.0264629	0.0186504	0.010743	0.0119524	0.054786	0.105278	0.0743391	0.0798622	0.0320519	0.0290113	0.0659336	0.0135459	0.0397735	0.0276809	FALSE	FALSE	FALSE	FALSE	FALSE	FALSE	FALSE	FALSE	FALSE	FALSE	FALSE	FALSE	FALSE	FALSE	FALSE	FALSE
YOL004W	FALSE	0.0128668	0.0135034	0.00986497	0.039392	0.0683788	0.0529906	0.025052	0.00530631	0.0121186	0.0144601	0.0346364	0.0245939	0.0432258	0.00659125	0.0140622	0.0347984	FALSE	FALSE	FALSE	FALSE	FALSE	FALSE	FALSE	FALSE	FALSE	FALSE	FALSE	FALSE	FALSE	FALSE	FALSE	FALSE
YMR102C	FALSE	0.0776476	0.0231014	0.0329752	0.0187454	0.0130449	0.0305898	0.0571395	0.110976	0.0617374	0.0520784	0.00620558	0.00610458	0.00153258	0.0299672	0.020965	0.0337746	FALSE	FALSE	FALSE	FALSE	FALSE	FALSE	FALSE	FALSE	FALSE	FALSE	FALSE	FALSE	FALSE	FALSE	FALSE	FALSE
YLR268W	FALSE	0.103948	0.0364853	0.0151785	0.0611892	0.0765339	0.0921159	0.0775079	0.0808357	0.0360053	0.0122025	0.034606	0.0312255	0.0379752	0.0733957	0.056959	0.0112015	FALSE	FALSE	FALSE	FALSE	FALSE	FALSE	FALSE	FALSE	FALSE	FALSE	FALSE	FALSE	FALSE	FALSE	FALSE	FALSE
YFR012W	FALSE	0.242409	0.130585	0.0976465	0.151078	0.0590424	0.0483874	0.0442341	0.233843	0.308931	0.139076	0.207996	0.173313	0.0697547	0.0846749	0.194435	0.0108862	FALSE	FALSE	FALSE	FALSE	FALSE	FALSE	FALSE	FALSE	TRUE	FALSE	FALSE	FALSE	FALSE	FALSE	FALSE	FALSE
YNL065W	FALSE	0.168614	0.179646	0.249398	0.197124	0.117907	0.0209794	0.0166454	0.0440694	0.0820577	0.179495	0.101754	0.116826	0.153095	0.169725	0.0923345	0.0882551	FALSE	FALSE	FALSE	FALSE	FALSE	FALSE	FALSE	FALSE	FALSE	FALSE	FALSE	FALSE	FALSE	FALSE	FALSE	FALSE
YOR307C	FALSE	0.0566422	0.0171565	0.0638947	0.121024	0.129185	0.115303	0.0831318	0.084624	0.0147471	0.0452007	0.0431614	0.121429	0.128497	0.0745402	0.0379241	0.0579844	FALSE	FALSE	FALSE	FALSE	FALSE	FALSE	FALSE	FALSE	FALSE	FALSE	FALSE	FALSE	FALSE	FALSE	FALSE	FALSE
YKR053C	FALSE	0.0340682	0.046605	0.0319697	0.00723251	0.00940064	0.0240121	0.0585566	0.0356909	0.0179958	0.0109927	0.0683429	0.0437041	0.0157975	0.0207627	0.00317478	0.0264733	FALSE	FALSE	FALSE	FALSE	FALSE	FALSE	FALSE	FALSE	FALSE	FALSE	FALSE	FALSE	FALSE	FALSE	FALSE	FALSE
YER172C	FALSE	0.0317206	0.0106503	0.0529529	0.0198659	0.0742014	0.00255269	0.00393446	0.0381531	0.0245234	0.0558816	0.0476883	0.00932053	0.00294627	0.0360093	0.0100929	0.0117047	FALSE	FALSE	FALSE	FALSE	FALSE	FALSE	FALSE	FALSE	FALSE	FALSE	FALSE	FALSE	FALSE	FALSE	FALSE	FALSE
YMR315W-A	FALSE	0.0588527	0.0339937	0.193784	0.0951544	0.0927967	0.102115	0.0974094	0.044083	0.0410065	0.195911	0.293641	0.146279	0.0188818	0.0108921	0.0218735	0.0904849	FALSE	FALSE	FALSE	FALSE	FALSE	FALSE	FALSE	FALSE	FALSE	FALSE	TRUE	FALSE	FALSE	FALSE	FALSE	FALSE
YDR460W	FALSE	0.136557	0.103174	0.0956977	0.0937027	0.0320225	0.0090887	0.0326398	0.168525	0.134764	0.100593	0.035628	0.0857167	0.0195596	0.040337	0.0191338	0.00629316	FALSE	FALSE	FALSE	FALSE	FALSE	FALSE	FALSE	FALSE	FALSE	FALSE	FALSE	FALSE	FALSE	FALSE	FALSE	FALSE
YML116W	FALSE	0.195399	0.13202	0.107841	0.0580073	0.00986626	0.023613	0.00954231	0.00895443	0.0637724	0.0295019	0.0363198	0.0461986	0.0518503	0.112837	0.109864	0.0545385	FALSE	FALSE	FALSE	FALSE	FALSE	FALSE	FALSE	FALSE	FALSE	FALSE	FALSE	FALSE	FALSE	FALSE	FALSE	FALSE
YHR004C	FALSE	0.145022	0.0480821	0.0246971	0.0496731	0.0291624	0.0465574	0.0167236	0.00883989	0.0980998	0.00860953	0.027798	0.00649231	0.0279087	0.0112663	0.0237563	0.00439957	FALSE	FALSE	FALSE	FALSE	FALSE	FALSE	FALSE	FALSE	FALSE	FALSE	FALSE	FALSE	FALSE	FALSE	FALSE	FALSE
YNL269W	FALSE	0.0459119	0.0204545	0.129057	0.23243	0.0773267	0.130037	0.00359636	0.104763	0.291986	0.014952	0.440051	0.0106523	0.198697	0.0469568	0.0483759	0.131989	FALSE	FALSE	FALSE	FALSE	FALSE	FALSE	FALSE	FALSE	TRUE	FALSE	TRUE	FALSE	FALSE	FALSE	FALSE	FALSE
YDL142C	FALSE	0.0981664	0.0395097	0.0974265	0.0134653	0.00240398	0.00863655	0.0176798	0.0344374	0.0229054	0.0219462	0.0642331	0.0147049	0.0155512	0.0705406	0.0485525	0.00689584	FALSE	FALSE	FALSE	FALSE	FALSE	FALSE	FALSE	FALSE	FALSE	FALSE	FALSE	FALSE	FALSE	FALSE	FALSE	FALSE
YLL050C	FALSE	0.059744	0.0279994	0.0223527	0.0548173	0.135052	0.115513	0.0690953	0.0634826	0.0667835	0.00848316	0.0335314	0.0116674	0.0551302	0.0885282	0.0881929	0.0822117	FALSE	FALSE	FALSE	FALSE	FALSE	FALSE	FALSE	FALSE	FALSE	FALSE	FALSE	FALSE	FALSE	FALSE	FALSE	FALSE
YBR141C	FALSE	0.022688	0.00756113	0.00845544	0.00622922	0.00601433	0.0362777	0.0290754	0.00408226	0.0075151	0.0309877	0.0839151	0.0014338	0.0122977	0.00888035	0.0137263	0.0350051	FALSE	FALSE	FALSE	FALSE	FALSE	FALSE	FALSE	FALSE	FALSE	FALSE	FALSE	FALSE	FALSE	FALSE	FALSE	FALSE
YBR118W	FALSE	0.00920296	0.00657531	0.0278707	0.00301931	0.032153	0.0156498	0.00128854	0.0469342	0.0208213	0.00317693	0.0860515	0.0738777	0.084284	0.0310874	0.00863125	0.069898	FALSE	FALSE	FALSE	FALSE	FALSE	FALSE	FALSE	FALSE	FALSE	FALSE	FALSE	FALSE	FALSE	FALSE	FALSE	FALSE
YBR038W	FALSE	0.811759	0.646719	0.656595	0.211976	0.121836	0.353917	0.478109	0.649768	0.628675	0.565187	0.305222	0.196718	0.099291	0.0157464	0.121267	0.197285	TRUE	TRUE	TRUE	FALSE	FALSE	TRUE	TRUE	TRUE	TRUE	TRUE	TRUE	FALSE	FALSE	FALSE	FALSE	FALSE
YJL063C	FALSE	0.0261307	0.0181417	0.050768	0.119663	0.0961035	0.112837	0.0430549	0.0207319	0.045976	0.162617	0.0800095	0.0896474	0.0758832	0.034401	0.00252274	0.00124791	FALSE	FALSE	FALSE	FALSE	FALSE	FALSE	FALSE	FALSE	FALSE	FALSE	FALSE	FALSE	FALSE	FALSE	FALSE	FALSE
YLR287C	FALSE	0.0150699	0.0140604	0.0146855	0.0503567	0.0768524	0.0602669	0.0280568	0.042645	0.018455	0.0413834	0.0390594	0.0495612	0.0519775	0.0190103	0.0590146	0.0368796	FALSE	FALSE	FALSE	FALSE	FALSE	FALSE	FALSE	FALSE	FALSE	FALSE	FALSE	FALSE	FALSE	FALSE	FALSE	FALSE
YJR035W	FALSE	0.0246731	0.0685368	0.161352	0.126977	0.1317	0.0614429	0.0337103	0.094252	0.143155	0.18773	0.113132	0.0635576	0.0304275	0.0912838	0.00659765	0.0337417	FALSE	FALSE	FALSE	FALSE	FALSE	FALSE	FALSE	FALSE	FALSE	FALSE	FALSE	FALSE	FALSE	FALSE	FALSE	FALSE
YKL214C	FALSE	0.0763878	0.0207923	0.033084	0.0368798	0.0357488	0.0285719	0.0552241	0.0509297	0.0257797	0.0186179	0.042634	0.0496445	0.0642066	0.0118386	0.00384333	0.0259004	FALSE	FALSE	FALSE	FALSE	FALSE	FALSE	FALSE	FALSE	FALSE	FALSE	FALSE	FALSE	FALSE	FALSE	FALSE	FALSE
YCR068W	FALSE	0.0123347	0.0116852	0.01727	0.0647057	0.0925436	0.0742268	0.0872892	0.0383336	0.0471527	0.0372653	0.0515032	0.0567741	0.058281	0.0230205	0.0503266	0.100332	FALSE	FALSE	FALSE	FALSE	FALSE	FALSE	FALSE	FALSE	FALSE	FALSE	FALSE	FALSE	FALSE	FALSE	FALSE	FALSE
YOR090C	FALSE	0.0236887	0.046042	0.0444363	0.00260712	0.0610428	0.0395737	0.0441958	0.023191	0.0201481	0.0221039	0.0245386	0.00134346	0.0228657	0.00172836	0.0207123	0.00465784	FALSE	FALSE	FALSE	FALSE	FALSE	FALSE	FALSE	FALSE	FALSE	FALSE	FALSE	FALSE	FALSE	FALSE	FALSE	FALSE
YER017C	FALSE	0.0364589	0.010284	0.00838284	0.0265129	0.00137703	0.00154384	0.0209819	0.0520599	0.0114002	0.0285091	0.0349987	0.0152513	0.0140318	0.00315951	0.0146908	0.0222001	FALSE	FALSE	FALSE	FALSE	FALSE	FALSE	FALSE	FALSE	FALSE	FALSE	FALSE	FALSE	FALSE	FALSE	FALSE	FALSE
YIL106W	TRUE	0.324683	0.298412	0.297301	0.0529077	0.083682	0.242658	0.334784	0.357129	0.342582	0.315226	0.122193	0.0255148	0.0422548	0.111911	0.154286	0.134145	TRUE	TRUE	TRUE	FALSE	FALSE	FALSE	TRUE	TRUE	TRUE	TRUE	FALSE	FALSE	FALSE	FALSE	FALSE	FALSE
YBL058W	FALSE	0.0397976	0.0558629	0.0821827	0.141461	0.0809297	0.0749536	0.0425355	0.0315686	0.0353162	0.0315382	0.0880067	0.0851316	0.0568576	0.0753305	0.0676924	0.046484	FALSE	FALSE	FALSE	FALSE	FALSE	FALSE	FALSE	FALSE	FALSE	FALSE	FALSE	FALSE	FALSE	FALSE	FALSE	FALSE
YPL117C	FALSE	0.0283266	0.0125364	0.00729705	0.00490045	0.00861022	0.0232048	0.0187961	0.00129806	0.00198363	0.00135101	0.0342241	0.00930203	0.00308119	0.00661344	0.0215421	0.055091	FALSE	FALSE	FALSE	FALSE	FALSE	FALSE	FALSE	FALSE	FALSE	FALSE	FALSE	FALSE	FALSE	FALSE	FALSE	FALSE
YLR188W	FALSE	0.10232	0.125986	0.125988	0.0908685	0.0255895	0.00694321	0.0728037	0.138849	0.120069	0.104192	0.0657894	0.0490888	0.0249843	0.00507876	0.0139215	0.00933469	FALSE	FALSE	FALSE	FALSE	FALSE	FALSE	FALSE	FALSE	FALSE	FALSE	FALSE	FALSE	FALSE	FALSE	FALSE	FALSE
YHL020C	FALSE	0.0474995	0.0203944	0.0165137	0.0374917	0.0124007	0.0237515	0.0101781	0.042037	0.0285216	0.0770793	0.071445	0.0442257	0.0268559	0.0151545	0.0215678	0.0466268	FALSE	FALSE	FALSE	FALSE	FALSE	FALSE	FALSE	FALSE	FALSE	FALSE	FALSE	FALSE	FALSE	FALSE	FALSE	FALSE
YBR178W	FALSE	0.00676358	0.0247351	0.0158563	0.0610556	0.0540071	0.0107733	0.0571006	0.0665315	0.121359	0.0151411	0.124134	0.0355342	0.0643374	0.00599361	0.0807522	0.0921276	FALSE	FALSE	FALSE	FALSE	FALSE	FALSE	FALSE	FALSE	FALSE	FALSE	FALSE	FALSE	FALSE	FALSE	FALSE	FALSE
YIL167W	FALSE	0.0544715	0.059296	0.03158	0.00893011	0.0570545	0.103677	0.138139	0.205108	0.25606	0.16282	0.00378906	0.0134812	0.0896605	0.149385	0.166841	0.158343	FALSE	FALSE	FALSE	FALSE	FALSE	FALSE	FALSE	FALSE	TRUE	FALSE	FALSE	FALSE	FALSE	FALSE	FALSE	FALSE
YGL096W	FALSE	0.176234	0.0222526	0.0239768	0.0708524	0.0682705	0.0266163	0.0103017	0.07486	0.0144018	0.0141741	0.0429598	0.0316949	0.00320152	0.074664	0.0434316	0.0536702	FALSE	FALSE	FALSE	FALSE	FALSE	FALSE	FALSE	FALSE	FALSE	FALSE	FALSE	FALSE	FALSE	FALSE	FALSE	FALSE
YML111W	FALSE	0.0209846	0.0330808	0.0312642	0.0284007	0.0311105	0.0493864	0.0235669	0.0179932	0.03878	0.0059187	0.0231464	0.0021166	0.00873563	0.0117894	0.0217714	0.0293957	FALSE	FALSE	FALSE	FALSE	FALSE	FALSE	FALSE	FALSE	FALSE	FALSE	FALSE	FALSE	FALSE	FALSE	FALSE	FALSE
YBR060C	TRUE	0.0160741	0.0029874	0.0263051	0.0153847	0.0153509	0.00922824	0.0111594	0.049754	0.0747547	0.0175107	0.0672171	0.00917771	0.00592784	0.020944	0.00435142	0.0126726	FALSE	FALSE	FALSE	FALSE	FALSE	FALSE	FALSE	FALSE	FALSE	FALSE	FALSE	FALSE	FALSE	FALSE	FALSE	FALSE
YER079W	FALSE	0.073759	0.0612252	0.0552569	0.0140746	0.0630167	0.0606419	0.0191353	0.0402925	0.00339817	0.0182181	0.0964511	0.0137361	0.0680405	0.0472353	0.0437911	0.0644821	FALSE	FALSE	FALSE	FALSE	FALSE	FALSE	FALSE	FALSE	FALSE	FALSE	FALSE	FALSE	FALSE	FALSE	FALSE	FALSE
YPL200W	FALSE	0.136268	0.101636	0.0655763	0.0529718	0.0447854	0.128326	0.154074	0.0345728	0.12248	0.339897	0.0866047	0.063836	0.0625975	0.316254	0.129396	0.037641	FALSE	FALSE	FALSE	FALSE	FALSE	FALSE	FALSE	FALSE	FALSE	TRUE	FALSE	FALSE	FALSE	TRUE	FALSE	FALSE
YNR036C	FALSE	0.0244709	0.00838035	0.0532065	0.0787347	0.131059	0.108604	0.0738713	0.070944	0.0825647	0.0266825	0.090893	0.086044	0.078283	0.0807239	0.0901888	0.0561117	FALSE	FALSE	FALSE	FALSE	FALSE	FALSE	FALSE	FALSE	FALSE	FALSE	FALSE	FALSE	FALSE	FALSE	FALSE	FALSE
YDL233W	FALSE	0.0375794	0.026093	0.0468798	0.00160032	0.0118974	0.0361311	0.0337806	0.0908927	0.0921764	0.0110455	0.00589762	0.0616508	0.0304094	0.0481695	0.0286373	0.079963	FALSE	FALSE	FALSE	FALSE	FALSE	FALSE	FALSE	FALSE	FALSE	FALSE	FALSE	FALSE	FALSE	FALSE	FALSE	FALSE
YDR335W	FALSE	0.00292086	0.0321185	0.0491677	0.00636111	0.0222937	0.0402685	0.0262071	0.0108844	0.0144109	0.011721	0.0378517	0.0242324	0.027153	0.0193194	0.0067864	0.0129617	FALSE	FALSE	FALSE	FALSE	FALSE	FALSE	FALSE	FALSE	FALSE	FALSE	FALSE	FALSE	FALSE	FALSE	FALSE	FALSE
YLR315W	FALSE	0.0195488	0.0288917	0.0145391	0.022927	0.0420761	0.0450438	0.0727559	0.0229248	0.0277437	0.0689333	0.0115733	0.0752655	0.0721091	0.0502174	0.0314652	0.0320084	FALSE	FALSE	FALSE	FALSE	FALSE	FALSE	FALSE	FALSE	FALSE	FALSE	FALSE	FALSE	FALSE	FALSE	FALSE	FALSE
YPL096C-A	FALSE	0.0436141	0.0172235	0.0109193	0.0176589	0.0958058	0.155139	0.124404	0.0829805	0.23642	0.0701167	0.119816	0.0243807	0.0919645	0.11231	0.103149	0.0374173	FALSE	FALSE	FALSE	FALSE	FALSE	FALSE	FALSE	FALSE	FALSE	FALSE	FALSE	FALSE	FALSE	FALSE	FALSE	FALSE
YCR087W	FALSE	0.00579417	0.00171129	0.0241545	0.0369541	0.0408458	0.0326463	0.00184717	0.0516766	0.00276133	0.0329913	0.0476901	0.0074654	0.00735737	0.00273917	0.0147876	0.0514932	FALSE	FALSE	FALSE	FALSE	FALSE	FALSE	FALSE	FALSE	FALSE	FALSE	FALSE	FALSE	FALSE	FALSE	FALSE	FALSE
YPR200C	FALSE	0.00160698	0.0359458	0.077171	0.0625953	0.0493368	0.140804	0.0387026	0.100637	0.132653	0.0962479	0.129991	0.0987027	0.0196166	0.074462	0.126369	0.0543794	FALSE	FALSE	FALSE	FALSE	FALSE	FALSE	FALSE	FALSE	FALSE	FALSE	FALSE	FALSE	FALSE	FALSE	FALSE	FALSE
YEL004W	FALSE	0.0596597	0.00633571	0.0121653	0.0278914	0.057874	0.0368434	0.0405077	0.0185444	0.0468175	0.023109	0.0314694	0.0181458	0.007157	0.0380059	0.0174794	0.00787737	FALSE	FALSE	FALSE	FALSE	FALSE	FALSE	FALSE	FALSE	FALSE	FALSE	FALSE	FALSE	FALSE	FALSE	FALSE	FALSE
YOL029C	FALSE	0.022157	0.0538017	0.0195917	0.053777	0.0180249	0.106375	0.0204846	0.0113934	0.0903738	0.0249191	0.137321	0.0357956	0.00173319	0.0250007	0.0324934	0.0377671	FALSE	FALSE	FALSE	FALSE	FALSE	FALSE	FALSE	FALSE	FALSE	FALSE	FALSE	FALSE	FALSE	FALSE	FALSE	FALSE
YGL173C	FALSE	0.00193171	0.0217867	0.0365347	0.0117666	0.0160734	0.0605922	0.0252031	0.00128316	0.00893898	0.0329694	0.0442014	0.0113562	0.00635776	0.0226637	0.0150186	0.0144104	FALSE	FALSE	FALSE	FALSE	FALSE	FALSE	FALSE	FALSE	FALSE	FALSE	FALSE	FALSE	FALSE	FALSE	FALSE	FALSE
YKR041W	FALSE	0.361347	0.172946	0.0455935	0.298064	0.259	0.359849	0.362277	0.294345	0.200196	0.190812	0.328963	0.106734	0.0673178	0.163542	0.285222	0.131179	TRUE	FALSE	FALSE	TRUE	TRUE	TRUE	TRUE	TRUE	FALSE	FALSE	TRUE	FALSE	FALSE	FALSE	TRUE	FALSE
YDR276C	FALSE	0.0425689	0.0404058	0.108149	0.0333558	0.0202715	0.0191407	0.0596971	0.115393	0.026024	0.148571	0.0349268	0.0377331	0.0292223	0.072575	0.0265215	0.0223437	FALSE	FALSE	FALSE	FALSE	FALSE	FALSE	FALSE	FALSE	FALSE	FALSE	FALSE	FALSE	FALSE	FALSE	FALSE	FALSE
YGL256W	FALSE	0.0128568	0.0283304	0.0409205	0.00324497	0.0496544	0.0172421	0.0130851	0.00406562	0.00277703	0.0310316	0.0335045	0.0454233	0.0461593	0.00941267	0.0167468	0.0017009	FALSE	FALSE	FALSE	FALSE	FALSE	FALSE	FALSE	FALSE	FALSE	FALSE	FALSE	FALSE	FALSE	FALSE	FALSE	FALSE
YOR317W	FALSE	0.0733127	0.0225229	0.05417	0.0385978	0.0488166	0.0482452	0.0478684	0.128118	0.072511	0.0374571	0.0232464	0.0154379	0.063831	0.0835726	0.0698803	0.0780269	FALSE	FALSE	FALSE	FALSE	FALSE	FALSE	FALSE	FALSE	FALSE	FALSE	FALSE	FALSE	FALSE	FALSE	FALSE	FALSE
YCR081W	FALSE	0.016734	0.0151634	0.0172883	0.0488661	0.040132	0.0898242	0.0819089	0.0381629	0.0348226	0.0194692	0.0690144	0.02423	0.0291302	0.0301996	0.0647653	0.0159557	FALSE	FALSE	FALSE	FALSE	FALSE	FALSE	FALSE	FALSE	FALSE	FALSE	FALSE	FALSE	FALSE	FALSE	FALSE	FALSE
YMR013C	FALSE	0.0523336	0.0287944	0.0140594	0.0154578	0.0175894	0.0495806	0.00821864	0.0109684	0.0406462	0.00406802	0.0186946	0.0453179	0.00863428	0.00242161	0.00507781	0.0181832	FALSE	FALSE	FALSE	FALSE	FALSE	FALSE	FALSE	FALSE	FALSE	FALSE	FALSE	FALSE	FALSE	FALSE	FALSE	FALSE
YNL230C	FALSE	0.0120526	0.0345837	0.0101881	0.0245756	0.0156756	0.0773169	0.059136	0.0165397	0.0459336	0.0315656	0.0579478	0.0117193	0.00412745	0.0155148	0.0613076	0.0027975	FALSE	FALSE	FALSE	FALSE	FALSE	FALSE	FALSE	FALSE	FALSE	FALSE	FALSE	FALSE	FALSE	FALSE	FALSE	FALSE
YDR142C	FALSE	0.00144658	0.00601556	0.0173346	0.00537114	0.0257521	0.0203195	0.0688142	0.0140158	0.0287456	0.0100324	0.0310921	0.00150687	0.0011679	0.0134509	0.0336256	0.0171178	FALSE	FALSE	FALSE	FALSE	FALSE	FALSE	FALSE	FALSE	FALSE	FALSE	FALSE	FALSE	FALSE	FALSE	FALSE	FALSE
YPL091W	FALSE	0.114276	0.0847005	0.0720506	0.0364474	0.0260412	0.0654293	0.0903791	0.171055	0.154264	0.154234	0.034116	0.012383	0.0256053	0.0633851	0.0621713	0.0843683	FALSE	FALSE	FALSE	FALSE	FALSE	FALSE	FALSE	FALSE	FALSE	FALSE	FALSE	FALSE	FALSE	FALSE	FALSE	FALSE
YOR374W	FALSE	0.123557	0.153504	0.365727	0.409746	0.390102	0.352881	0.239814	0.253895	0.126964	0.0189785	0.116519	0.243927	0.410155	0.432291	0.374425	0.312687	FALSE	FALSE	TRUE	TRUE	TRUE	TRUE	FALSE	TRUE	FALSE	FALSE	FALSE	FALSE	TRUE	TRUE	TRUE	TRUE
YKL080W	FALSE	0.0123032	0.0147408	0.049092	0.0173533	0.00429758	0.00872023	0.00510671	0.0221694	0.0186321	0.0125147	0.0302474	0.0130073	0.00891404	0.0376042	0.0354648	0.0411774	FALSE	FALSE	FALSE	FALSE	FALSE	FALSE	FALSE	FALSE	FALSE	FALSE	FALSE	FALSE	FALSE	FALSE	FALSE	FALSE
YOR266W	FALSE	0.0792393	0.0273855	0.0489206	0.00770279	0.10491	0.0611638	0.111327	0.0106651	0.0396343	0.0215858	0.0379044	0.0220947	0.0155479	0.0534074	0.0218041	0.0168799	FALSE	FALSE	FALSE	FALSE	FALSE	FALSE	FALSE	FALSE	FALSE	FALSE	FALSE	FALSE	FALSE	FALSE	FALSE	FALSE
YLR133W	FALSE	0.0914324	0.111301	0.101127	0.0636155	0.00876862	0.0373517	0.0479124	0.0780972	0.0503792	0.0349219	0.00460069	0.0666825	0.0546487	0.0285141	0.0102518	0.0442407	FALSE	FALSE	FALSE	FALSE	FALSE	FALSE	FALSE	FALSE	FALSE	FALSE	FALSE	FALSE	FALSE	FALSE	FALSE	FALSE
YDR483W	FALSE	0.0500681	0.0320179	0.0163881	0.0166381	0.0186617	0.048998	0.0457657	0.0287311	0.0128852	0.00282082	0.0148742	0.0161725	0.00873687	0.00740447	0.00387866	0.00846378	FALSE	FALSE	FALSE	FALSE	FALSE	FALSE	FALSE	FALSE	FALSE	FALSE	FALSE	FALSE	FALSE	FALSE	FALSE	FALSE
YAL046C	FALSE	0.0723473	0.0411208	0.0798775	0.00100065	0.0674699	0.0786154	0.019889	0.102988	0.0357886	0.0169119	0.0300613	0.0193166	0.0242525	0.0227712	0.00244292	0.0196307	FALSE	FALSE	FALSE	FALSE	FALSE	FALSE	FALSE	FALSE	FALSE	FALSE	FALSE	FALSE	FALSE	FALSE	FALSE	FALSE
YMR272C	FALSE	0.0662861	0.0445072	0.0207135	0.0113751	0.0167438	0.0535943	0.0548238	0.0590232	0.0453424	0.0658855	0.0165541	0.02305	0.00749026	0.0201552	0.0544357	0.0486156	FALSE	FALSE	FALSE	FALSE	FALSE	FALSE	FALSE	FALSE	FALSE	FALSE	FALSE	FALSE	FALSE	FALSE	FALSE	FALSE
YLL043W	FALSE	0.123129	0.0698873	0.0331046	0.0347521	0.0168677	0.0496839	0.0416923	0.0617612	0.0658167	0.0554262	0.00433503	0.0189499	0.0129873	0.0105709	0.019803	0.0138658	FALSE	FALSE	FALSE	FALSE	FALSE	FALSE	FALSE	FALSE	FALSE	FALSE	FALSE	FALSE	FALSE	FALSE	FALSE	FALSE
YBL027W	FALSE	0.0459268	0.0291427	0.00917158	0.0560889	0.0860631	0.0596708	0.0440604	0.00321605	0.0119326	0.0148962	0.0442934	0.0798478	0.0614762	0.061327	0.0517146	0.0352621	FALSE	FALSE	FALSE	FALSE	FALSE	FALSE	FALSE	FALSE	FALSE	FALSE	FALSE	FALSE	FALSE	FALSE	FALSE	FALSE
YPR097W	FALSE	0.0522821	0.0486933	0.0337044	0.00823024	0.0145327	0.00533148	0.0157691	0.0154329	0.00615855	0.0597564	0.079499	0.003206	0.0149297	0.00910074	0.00667837	0.00364871	FALSE	FALSE	FALSE	FALSE	FALSE	FALSE	FALSE	FALSE	FALSE	FALSE	FALSE	FALSE	FALSE	FALSE	FALSE	FALSE
YBR089C-A	FALSE	0.00269605	0.0158859	0.0543245	0.0469467	0.0719869	0.00450408	0.0100148	0.0176858	0.0610743	0.0135029	0.0138364	0.0151039	0.0422322	0.0561498	0.10917	0.053094	FALSE	FALSE	FALSE	FALSE	FALSE	FALSE	FALSE	FALSE	FALSE	FALSE	FALSE	FALSE	FALSE	FALSE	FALSE	FALSE
YKL196C	FALSE	0.0261845	0.0616898	0.0475469	0.0607874	0.0187957	0.00379763	0.0376571	0.0071817	0.0145035	0.0186847	0.086428	0.025152	0.0199715	0.0209145	0.0307389	0.00264017	FALSE	FALSE	FALSE	FALSE	FALSE	FALSE	FALSE	FALSE	FALSE	FALSE	FALSE	FALSE	FALSE	FALSE	FALSE	FALSE
YJR144W	FALSE	0.0708775	0.0557349	0.0919591	0.0062114	0.064911	0.0983915	0.120434	0.10042	0.124343	0.0104436	0.00432124	0.0429656	0.065002	0.0120698	0.045563	0.0397662	FALSE	FALSE	FALSE	FALSE	FALSE	FALSE	FALSE	FALSE	FALSE	FALSE	FALSE	FALSE	FALSE	FALSE	FALSE	FALSE
YDR115W	FALSE	0.126155	0.0914838	0.0382344	0.00949968	0.0878522	0.157792	0.109555	0.136882	0.129129	0.089871	0.0455906	0.0466302	0.0878063	0.0396297	0.0334461	0.0616867	FALSE	FALSE	FALSE	FALSE	FALSE	FALSE	FALSE	FALSE	FALSE	FALSE	FALSE	FALSE	FALSE	FALSE	FALSE	FALSE
YBR270C	FALSE	0.054438	0.0416032	0.0606006	0.00126364	0.0460878	0.0481926	0.00493483	0.0345758	0.00274343	0.0816205	0.0444552	0.016826	0.0536087	0.00760667	0.0107678	0.0548224	FALSE	FALSE	FALSE	FALSE	FALSE	FALSE	FALSE	FALSE	FALSE	FALSE	FALSE	FALSE	FALSE	FALSE	FALSE	FALSE
YER023W	FALSE	0.0194643	0.00692222	0.0119469	0.0025028	0.0290988	0.0319425	0.00140291	0.0464761	0.0389789	0.0288606	0.0522672	0.019132	0.0507047	0.00428318	0.0363777	0.0632882	FALSE	FALSE	FALSE	FALSE	FALSE	FALSE	FALSE	FALSE	FALSE	FALSE	FALSE	FALSE	FALSE	FALSE	FALSE	FALSE
YOR272W	FALSE	0.028854	0.0488061	0.110446	0.0773772	0.0573563	0.0861489	0.0651362	0.00967297	0.0339926	0.0908572	0.0601809	0.0388248	0.0693823	0.0496046	0.0650852	0.0650344	FALSE	FALSE	FALSE	FALSE	FALSE	FALSE	FALSE	FALSE	FALSE	FALSE	FALSE	FALSE	FALSE	FALSE	FALSE	FALSE
YDL174C	FALSE	0.243279	0.0989402	0.071843	0.0150755	0.0625955	0.0901001	0.0771826	0.083832	0.0334508	0.0155739	0.0325063	0.0132449	0.0446915	0.0146996	0.00133512	0.0418155	FALSE	FALSE	FALSE	FALSE	FALSE	FALSE	FALSE	FALSE	FALSE	FALSE	FALSE	FALSE	FALSE	FALSE	FALSE	FALSE
YPR036W	FALSE	0.0604577	0.0725658	0.0658019	0.0301556	0.00461666	0.0192094	0.0166858	0.0061097	0.00962942	0.0200496	0.026555	0.0340947	0.027209	0.0423324	0.0332607	0.0295352	FALSE	FALSE	FALSE	FALSE	FALSE	FALSE	FALSE	FALSE	FALSE	FALSE	FALSE	FALSE	FALSE	FALSE	FALSE	FALSE
YLL026W	FALSE	0.0446025	0.0190771	0.0383477	0.0410921	0.0568846	0.0873454	0.108416	0.0886694	0.0270842	0.0348087	0.0248648	0.0422968	0.074239	0.0951954	0.0661313	0.0774489	FALSE	FALSE	FALSE	FALSE	FALSE	FALSE	FALSE	FALSE	FALSE	FALSE	FALSE	FALSE	FALSE	FALSE	FALSE	FALSE
YBR181C	FALSE	0.00399859	0.0101288	0.0549934	0.00695919	0.0284902	0.0169169	0.0163444	0.0269568	0.0215152	0.0179935	0.0589595	0.0369909	0.028487	0.0344862	0.0197232	0.0333597	FALSE	FALSE	FALSE	FALSE	FALSE	FALSE	FALSE	FALSE	FALSE	FALSE	FALSE	FALSE	FALSE	FALSE	FALSE	FALSE
YLL054C	FALSE	0.0399988	0.0243132	0.0252665	0.0147602	0.00474396	0.0048051	0.05075	0.0275136	0.0729068	0.00996932	0.0639037	0.0221712	0.0226626	0.0246746	0.0318231	0.0234527	FALSE	FALSE	FALSE	FALSE	FALSE	FALSE	FALSE	FALSE	FALSE	FALSE	FALSE	FALSE	FALSE	FALSE	FALSE	FALSE
YPL020C	FALSE	0.0412343	0.0683583	0.053225	0.0579534	0.0138021	0.0262461	0.00492379	0.0462783	0.110197	0.0614894	0.0142496	0.0550771	0.0184419	0.0219054	0.00825008	0.0735086	FALSE	FALSE	FALSE	FALSE	FALSE	FALSE	FALSE	FALSE	FALSE	FALSE	FALSE	FALSE	FALSE	FALSE	FALSE	FALSE
YCR019W	FALSE	0.0295854	0.00974137	0.00790314	0.0429327	0.0141398	0.00442027	0.019953	0.00603655	0.0241768	0.00810122	0.0596778	0.0285071	0.0143581	0.0272748	0.0243703	0.0137529	FALSE	FALSE	FALSE	FALSE	FALSE	FALSE	FALSE	FALSE	FALSE	FALSE	FALSE	FALSE	FALSE	FALSE	FALSE	FALSE
YGL253W	FALSE	0.0579866	0.0459659	0.0223676	0.00925004	0.0295059	0.0331604	0.0212147	0.0338935	0.0048754	0.059115	0.0678501	0.0155447	0.0130671	0.0152878	0.0198904	0.0448419	FALSE	FALSE	FALSE	FALSE	FALSE	FALSE	FALSE	FALSE	FALSE	FALSE	FALSE	FALSE	FALSE	FALSE	FALSE	FALSE
YBR133C	TRUE	0.125965	0.0383879	0.0219319	0.0438205	0.0879685	0.124809	0.0648101	0.0596357	0.024888	0.0100629	0.0408782	0.0799993	0.0473621	0.00127665	0.0121237	0.00364486	FALSE	FALSE	FALSE	FALSE	FALSE	FALSE	FALSE	FALSE	FALSE	FALSE	FALSE	FALSE	FALSE	FALSE	FALSE	FALSE
YDR408C	FALSE	0.0795162	0.122464	0.190139	0.0984891	0.045749	0.0156	0.00228311	0.0328353	0.0669961	0.0112696	0.0435955	0.0677156	0.0885563	0.0651382	0.0886858	0.116469	FALSE	FALSE	FALSE	FALSE	FALSE	FALSE	FALSE	FALSE	FALSE	FALSE	FALSE	FALSE	FALSE	FALSE	FALSE	FALSE
YNL061W	FALSE	0.00462248	0.0196942	0.0618547	0.0252446	0.0396671	0.052297	0.0380227	0.0498039	0.0362826	0.0179447	0.053026	0.00198796	0.0189664	0.0639465	0.0777208	0.0569671	FALSE	FALSE	FALSE	FALSE	FALSE	FALSE	FALSE	FALSE	FALSE	FALSE	FALSE	FALSE	FALSE	FALSE	FALSE	FALSE
YBR198C	FALSE	0.0748283	0.0639176	0.02621	0.0353278	0.00624117	0.0113715	0.0134099	0.0388233	0.0439361	0.0906377	0.0232707	0.0607108	0.0321999	0.00974735	0.0177783	0.0241741	FALSE	FALSE	FALSE	FALSE	FALSE	FALSE	FALSE	FALSE	FALSE	FALSE	FALSE	FALSE	FALSE	FALSE	FALSE	FALSE
YMR320W	FALSE	0.0563304	0.0674023	0.0494838	0.00592939	0.0533913	0.0260719	0.0453957	0.0210475	0.0192015	0.028147	0.167627	0.100861	0.00596797	0.0173784	0.0392289	0.0113613	FALSE	FALSE	FALSE	FALSE	FALSE	FALSE	FALSE	FALSE	FALSE	FALSE	FALSE	FALSE	FALSE	FALSE	FALSE	FALSE
YKL212W	FALSE	0.0686017	0.0539114	0.0468994	0.00457055	0.0171845	0.0253554	0.0452538	0.0789409	0.0564774	0.0616379	0.0195535	0.0132311	0.0298138	0.0207656	0.00747967	0.0184796	FALSE	FALSE	FALSE	FALSE	FALSE	FALSE	FALSE	FALSE	FALSE	FALSE	FALSE	FALSE	FALSE	FALSE	FALSE	FALSE
YDR063W	FALSE	0.033338	0.00279787	0.0310138	0.0387902	0.0364599	0.0424973	0.0224939	0.0137959	0.00317829	0.0299041	0.0190008	0.0322027	0.0117684	0.0258615	0.00922217	0.0432933	FALSE	FALSE	FALSE	FALSE	FALSE	FALSE	FALSE	FALSE	FALSE	FALSE	FALSE	FALSE	FALSE	FALSE	FALSE	FALSE
YDR209C	FALSE	0.0365747	0.026762	0.0552369	0.0206103	0.0102333	0.0228319	0.0241515	0.0323983	0.0773203	0.0190434	0.00270843	0.0065891	0.00247643	0.0175028	0.0822009	0.0335369	FALSE	FALSE	FALSE	FALSE	FALSE	FALSE	FALSE	FALSE	FALSE	FALSE	FALSE	FALSE	FALSE	FALSE	FALSE	FALSE
YJR103W	FALSE	0.0262569	0.00285973	0.00137163	0.00669357	0.0389356	0.0742111	0.0590205	0.106351	0.0933704	0.0423646	0.143414	0.0513547	0.0358708	0.1181	0.0734552	0.0483416	FALSE	FALSE	FALSE	FALSE	FALSE	FALSE	FALSE	FALSE	FALSE	FALSE	FALSE	FALSE	FALSE	FALSE	FALSE	FALSE
YKL096W	FALSE	0.401004	0.244295	0.0065697	0.257355	0.318383	0.31899	0.2786	0.231279	0.0699382	0.124955	0.236738	0.265853	0.222499	0.09724	0.104051	0.256848	TRUE	FALSE	FALSE	TRUE	TRUE	TRUE	TRUE	FALSE	FALSE	FALSE	FALSE	TRUE	FALSE	FALSE	FALSE	TRUE
YOR003W	FALSE	0.0964656	0.0829678	0.0491738	0.0901257	0.00790642	0.0527564	0.0423052	0.0327633	0.0528366	0.00131856	0.0569959	0.0649355	0.0995673	0.0539914	0.0186658	0.032069	FALSE	FALSE	FALSE	FALSE	FALSE	FALSE	FALSE	FALSE	FALSE	FALSE	FALSE	FALSE	FALSE	FALSE	FALSE	FALSE
YDR469W	FALSE	0.0578846	0.0543945	0.0131704	0.00557489	0.0804134	0.0289501	0.0108094	0.0690903	0.0411359	0.0309709	0.061502	0.00881538	0.0122493	0.0260255	0.0686546	0.0675961	FALSE	FALSE	FALSE	FALSE	FALSE	FALSE	FALSE	FALSE	FALSE	FALSE	FALSE	FALSE	FALSE	FALSE	FALSE	FALSE
YEL036C	FALSE	0.0934918	0.00496371	0.137031	0.12267	0.141811	0.109308	0.0822114	0.0704944	0.0282308	0.0453674	0.104322	0.0766896	0.10424	0.0962135	0.0540955	0.0439174	FALSE	FALSE	FALSE	FALSE	FALSE	FALSE	FALSE	FALSE	FALSE	FALSE	FALSE	FALSE	FALSE	FALSE	FALSE	FALSE
YOR171C	FALSE	0.00705471	0.0337822	0.00919573	0.0191477	0.05623	0.0732328	0.0514456	0.0257794	0.0534987	0.0224453	0.0294661	0.00575019	0.0156938	0.0378192	0.0563503	0.0684598	FALSE	FALSE	FALSE	FALSE	FALSE	FALSE	FALSE	FALSE	FALSE	FALSE	FALSE	FALSE	FALSE	FALSE	FALSE	FALSE
YIR039C	FALSE	0.0420012	0.0734379	0.0499768	0.0463109	0.0109066	0.0143761	0.0273083	0.0329725	0.0147501	0.0392218	0.0226664	0.0251377	0.019933	0.0542744	0.124848	0.0559792	FALSE	FALSE	FALSE	FALSE	FALSE	FALSE	FALSE	FALSE	FALSE	FALSE	FALSE	FALSE	FALSE	FALSE	FALSE	FALSE
YPR156C	FALSE	0.255706	0.254566	0.291858	0.0888913	0.116894	0.193807	0.307616	0.422769	0.395895	0.325918	0.267948	0.00672517	0.0963201	0.125661	0.21747	0.285213	TRUE	TRUE	TRUE	FALSE	FALSE	FALSE	TRUE	TRUE	TRUE	TRUE	TRUE	FALSE	FALSE	FALSE	FALSE	TRUE
YOR246C	FALSE	0.0353755	0.0278215	0.124172	0.105931	0.122782	0.118388	0.0988005	0.0468718	0.0469647	0.0978608	0.0961591	0.102619	0.0836248	0.0907729	0.0520035	0.0125574	FALSE	FALSE	FALSE	FALSE	FALSE	FALSE	FALSE	FALSE	FALSE	FALSE	FALSE	FALSE	FALSE	FALSE	FALSE	FALSE
YDL019C	FALSE	0.0180123	0.0312272	0.039324	0.0558003	0.0607891	0.0454261	0.0527616	0.0497534	0.0335281	0.00413635	0.0226493	0.0597587	0.0606729	0.0386624	0.0495759	0.0249663	FALSE	FALSE	FALSE	FALSE	FALSE	FALSE	FALSE	FALSE	FALSE	FALSE	FALSE	FALSE	FALSE	FALSE	FALSE	FALSE
YFL024C	FALSE	0.0227277	0.0159946	0.00373261	0.0523583	0.0472835	0.0544086	0.0633747	0.0612735	0.00381899	0.0210983	0.00794905	0.0136957	0.0517101	0.051483	0.0327301	0.0630919	FALSE	FALSE	FALSE	FALSE	FALSE	FALSE	FALSE	FALSE	FALSE	FALSE	FALSE	FALSE	FALSE	FALSE	FALSE	FALSE
YHL010C	FALSE	0.0575823	0.0315285	0.094828	0.0177679	0.0343405	0.0276763	0.00382363	0.0849448	0.0404077	0.00350078	0.0496331	0.0316653	0.0270396	0.0179007	0.0050813	0.0093174	FALSE	FALSE	FALSE	FALSE	FALSE	FALSE	FALSE	FALSE	FALSE	FALSE	FALSE	FALSE	FALSE	FALSE	FALSE	FALSE
YDL178W	FALSE	0.167628	0.124988	0.115907	0.0406651	0.0145175	0.0233669	0.024025	0.0693849	0.0257653	0.0178635	0.00282306	0.019286	0.0378584	0.0589346	0.108293	0.112745	FALSE	FALSE	FALSE	FALSE	FALSE	FALSE	FALSE	FALSE	FALSE	FALSE	FALSE	FALSE	FALSE	FALSE	FALSE	FALSE
YLR039C	FALSE	0.0923225	0.0473415	0.00163602	0.0236193	0.037129	0.0498477	0.0252465	0.0435352	0.0406952	0.0595571	0.0155387	0.00752219	0.0191982	0.0240194	0.0101829	0.00115381	FALSE	FALSE	FALSE	FALSE	FALSE	FALSE	FALSE	FALSE	FALSE	FALSE	FALSE	FALSE	FALSE	FALSE	FALSE	FALSE
YKR084C	FALSE	0.0237048	0.0235732	0.0301265	0.0141558	0.0266752	0.0129484	0.00148067	0.0210811	0.00219135	0.0338162	0.0364383	0.0234828	0.00104988	0.00690508	0.0234714	0.00266283	FALSE	FALSE	FALSE	FALSE	FALSE	FALSE	FALSE	FALSE	FALSE	FALSE	FALSE	FALSE	FALSE	FALSE	FALSE	FALSE
YOR091W	FALSE	0.022184	0.00582534	0.0231974	0.0359948	0.0188209	0.00993778	0.0458232	0.0214144	0.0198151	0.058576	0.0227929	0.0514407	0.0400981	0.00790934	0.0036297	0.0271801	FALSE	FALSE	FALSE	FALSE	FALSE	FALSE	FALSE	FALSE	FALSE	FALSE	FALSE	FALSE	FALSE	FALSE	FALSE	FALSE
YDR178W	FALSE	0.0899334	0.159328	0.289941	0.214503	0.179989	0.107899	0.00249138	0.141897	0.155485	0.210667	0.178279	0.0872267	0.0955097	0.0908256	0.115606	0.0668377	FALSE	FALSE	TRUE	FALSE	FALSE	FALSE	FALSE	FALSE	FALSE	FALSE	FALSE	FALSE	FALSE	FALSE	FALSE	FALSE
YLR103C	TRUE	0.395338	0.293986	0.274278	0.0751123	0.00882747	0.138204	0.342094	0.569676	0.489336	0.41709	0.0943072	0.0526056	0.124396	0.129082	0.0915826	0.119863	TRUE	TRUE	TRUE	FALSE	FALSE	FALSE	TRUE	TRUE	TRUE	TRUE	FALSE	FALSE	FALSE	FALSE	FALSE	FALSE
YNR031C	FALSE	0.0477121	0.0346622	0.0067547	0.0107575	0.025886	0.00243123	0.0201902	0.0274825	0.0252127	0.0234207	0.0360815	0.00712791	0.0343533	0.0369313	0.00154651	0.0232796	FALSE	FALSE	FALSE	FALSE	FALSE	FALSE	FALSE	FALSE	FALSE	FALSE	FALSE	FALSE	FALSE	FALSE	FALSE	FALSE
YIL076W	FALSE	0.00396005	0.0129799	0.0010254	0.0535398	0.0316105	0.0245446	0.0264202	0.0360552	0.0745734	0.07598	0.00306369	0.0162277	0.0191362	0.0216556	0.0230696	0.00295002	FALSE	FALSE	FALSE	FALSE	FALSE	FALSE	FALSE	FALSE	FALSE	FALSE	FALSE	FALSE	FALSE	FALSE	FALSE	FALSE
YFR041C	FALSE	0.112726	0.108603	0.100146	0.0236104	0.00758901	0.0350317	0.044001	0.0205762	0.008641	0.0859029	0.0458788	0.0387134	0.0443563	0.025414	0.0498725	0.0508552	FALSE	FALSE	FALSE	FALSE	FALSE	FALSE	FALSE	FALSE	FALSE	FALSE	FALSE	FALSE	FALSE	FALSE	FALSE	FALSE
YMR010W	FALSE	0.0285079	0.0146951	0.0717406	0.0515974	0.0817581	0.0647024	0.0484819	0.0736038	0.0244749	0.00570393	0.0492377	0.0554576	0.0727561	0.0923934	0.0794858	0.0520481	FALSE	FALSE	FALSE	FALSE	FALSE	FALSE	FALSE	FALSE	FALSE	FALSE	FALSE	FALSE	FALSE	FALSE	FALSE	FALSE
YMR291W	FALSE	0.204921	0.192031	0.0928681	0.0254161	0.0893778	0.157251	0.146754	0.15917	0.151691	0.0533216	0.0192307	0.0264317	0.0251213	0.0340981	0.0257729	0.069922	FALSE	FALSE	FALSE	FALSE	FALSE	FALSE	FALSE	FALSE	FALSE	FALSE	FALSE	FALSE	FALSE	FALSE	FALSE	FALSE
YCL051W	FALSE	0.0859571	0.0232852	0.0248973	0.0688079	0.0397847	0.0301419	0.028228	0.00450267	0.055669	0.00185732	0.051298	0.0244882	0.0253142	0.0318917	0.0403707	0.024115	FALSE	FALSE	FALSE	FALSE	FALSE	FALSE	FALSE	FALSE	FALSE	FALSE	FALSE	FALSE	FALSE	FALSE	FALSE	FALSE
YIL151C	FALSE	0.0159359	0.039276	0.00964012	0.036185	0.00568458	0.0335085	0.00632297	0.0348474	0.0531167	0.0308279	0.00991909	0.00992701	0.0219641	0.0015261	0.00160299	0.0276342	FALSE	FALSE	FALSE	FALSE	FALSE	FALSE	FALSE	FALSE	FALSE	FALSE	FALSE	FALSE	FALSE	FALSE	FALSE	FALSE
YEL017C-A	FALSE	0.0855217	0.0078114	0.141474	0.0554096	0.0256604	0.070179	0.0486365	0.0652578	0.163573	0.140683	0.111151	0.0550415	0.0492399	0.048563	0.0381133	0.00501012	FALSE	FALSE	FALSE	FALSE	FALSE	FALSE	FALSE	FALSE	FALSE	FALSE	FALSE	FALSE	FALSE	FALSE	FALSE	FALSE
YMR015C	FALSE	0.171751	0.0450802	0.010933	0.0213649	0.03895	0.0496278	0.0805335	0.144763	0.101398	0.0235781	0.0191257	0.0849355	0.138048	0.116565	0.117501	0.146353	FALSE	FALSE	FALSE	FALSE	FALSE	FALSE	FALSE	FALSE	FALSE	FALSE	FALSE	FALSE	FALSE	FALSE	FALSE	FALSE
YCL005W	FALSE	0.0844911	0.0191486	0.0323297	0.0531996	0.0225531	0.0212052	0.0293613	0.0213494	0.0337739	0.0055446	0.0348186	0.0316578	0.0567801	0.0197271	0.0377211	0.00971787	FALSE	FALSE	FALSE	FALSE	FALSE	FALSE	FALSE	FALSE	FALSE	FALSE	FALSE	FALSE	FALSE	FALSE	FALSE	FALSE
YOL076W	FALSE	0.0446439	0.0137237	0.056701	0.118337	0.140092	0.115644	0.108978	0.0630173	0.00690231	0.0604713	0.091976	0.0574373	0.0709647	0.0761178	0.0857189	0.0369605	FALSE	FALSE	FALSE	FALSE	FALSE	FALSE	FALSE	FALSE	FALSE	FALSE	FALSE	FALSE	FALSE	FALSE	FALSE	FALSE
YDR247W	FALSE	0.0452981	0.0446044	0.0492094	0.0441298	0.037986	0.102078	0.00380642	0.0235198	0.118529	0.0691261	0.0114203	0.0696687	0.075709	0.06705	0.0180241	0.00765328	FALSE	FALSE	FALSE	FALSE	FALSE	FALSE	FALSE	FALSE	FALSE	FALSE	FALSE	FALSE	FALSE	FALSE	FALSE	FALSE
YGL133W	FALSE	0.0273765	0.00714607	0.0342361	0.0291335	0.0591186	0.0665682	0.0579609	0.0405399	0.0506001	0.0263476	0.00538416	0.0274784	0.0496904	0.0399041	0.0371669	0.0408445	FALSE	FALSE	FALSE	FALSE	FALSE	FALSE	FALSE	FALSE	FALSE	FALSE	FALSE	FALSE	FALSE	FALSE	FALSE	FALSE
YIL125W	FALSE	0.102227	0.0835342	0.0766459	0.00206957	0.00659088	0.0560928	0.051393	0.0395668	0.0400831	0.0216814	0.00795618	0.00484383	0.0256566	0.0157621	0.0248846	0.0360086	FALSE	FALSE	FALSE	FALSE	FALSE	FALSE	FALSE	FALSE	FALSE	FALSE	FALSE	FALSE	FALSE	FALSE	FALSE	FALSE
YGL073W	FALSE	0.00860329	0.0292442	0.082063	0.0276037	0.00637287	0.0526992	0.0390253	0.014907	0.018353	0.0446509	0.0336168	0.00962805	0.00210059	0.0231184	0.00608956	0.0151844	FALSE	FALSE	FALSE	FALSE	FALSE	FALSE	FALSE	FALSE	FALSE	FALSE	FALSE	FALSE	FALSE	FALSE	FALSE	FALSE
YLL014W	FALSE	0.0289167	0.0159681	0.0410662	0.0188771	0.0523348	0.0441821	0.0392763	0.018647	0.0666095	0.056927	0.0932339	0.00863073	0.0354372	0.0854052	0.0867801	0.0362191	FALSE	FALSE	FALSE	FALSE	FALSE	FALSE	FALSE	FALSE	FALSE	FALSE	FALSE	FALSE	FALSE	FALSE	FALSE	FALSE
YJL066C	FALSE	0.0231974	0.0839351	0.122444	0.202704	0.177683	0.0652606	0.0153173	0.0110508	0.0278643	0.114408	0.0584191	0.0931067	0.128795	0.104398	0.0876207	0.0689671	FALSE	FALSE	FALSE	FALSE	FALSE	FALSE	FALSE	FALSE	FALSE	FALSE	FALSE	FALSE	FALSE	FALSE	FALSE	FALSE
YKL143W	FALSE	0.0614675	0.0759223	0.11055	0.0369426	0.0734714	0.0840842	0.0498953	0.0563669	0.00161718	0.0354823	0.155533	0.0111745	0.0219352	0.144869	0.0942416	0.0666376	FALSE	FALSE	FALSE	FALSE	FALSE	FALSE	FALSE	FALSE	FALSE	FALSE	FALSE	FALSE	FALSE	FALSE	FALSE	FALSE
YBL014C	FALSE	0.0123192	0.0163524	0.0184791	0.0557061	0.0841361	0.0813361	0.0380459	0.0913864	0.024604	0.0234174	0.0311965	0.0170262	0.0585649	0.0944843	0.0588399	0.0254772	FALSE	FALSE	FALSE	FALSE	FALSE	FALSE	FALSE	FALSE	FALSE	FALSE	FALSE	FALSE	FALSE	FALSE	FALSE	FALSE
YHR133C	FALSE	0.00417372	0.0188473	0.0271754	0.00861642	0.0235385	0.074752	0.0555645	0.0644014	0.0716535	0.0292163	0.0253323	0.0291729	0.00471092	0.0680865	0.102384	0.0273463	FALSE	FALSE	FALSE	FALSE	FALSE	FALSE	FALSE	FALSE	FALSE	FALSE	FALSE	FALSE	FALSE	FALSE	FALSE	FALSE
YHR207C	FALSE	0.14844	0.0318215	0.029442	0.0695477	0.0624799	0.0989356	0.074734	0.0770546	0.0202434	0.00711874	0.0332628	0.015397	0.0673773	0.00239745	0.033645	0.0564938	FALSE	FALSE	FALSE	FALSE	FALSE	FALSE	FALSE	FALSE	FALSE	FALSE	FALSE	FALSE	FALSE	FALSE	FALSE	FALSE
YPR104C	FALSE	0.119298	0.0112811	0.100376	0.103301	0.125747	0.111233	0.0906932	0.091746	0.0270035	0.0563746	0.100931	0.073138	0.0598824	0.0688129	0.0830444	0.0213779	FALSE	FALSE	FALSE	FALSE	FALSE	FALSE	FALSE	FALSE	FALSE	FALSE	FALSE	FALSE	FALSE	FALSE	FALSE	FALSE
YNL264C	FALSE	0.0308447	0.0132444	0.071418	0.0839368	0.0645102	0.0209158	0.0124202	0.0418021	0.0714788	0.0772639	0.0121024	0.0191443	0.0181031	0.0109818	0.0487838	0.0431402	FALSE	FALSE	FALSE	FALSE	FALSE	FALSE	FALSE	FALSE	FALSE	FALSE	FALSE	FALSE	FALSE	FALSE	FALSE	FALSE
YBR231C	FALSE	0.104407	0.0261605	0.0771408	0.114005	0.139293	0.141585	0.061389	0.0156409	0.0546132	0.0806333	0.00410066	0.106329	0.0537549	0.0627145	0.0760988	0.0230593	FALSE	FALSE	FALSE	FALSE	FALSE	FALSE	FALSE	FALSE	FALSE	FALSE	FALSE	FALSE	FALSE	FALSE	FALSE	FALSE
YLR297W	FALSE	0.0736648	0.0102509	0.0521498	0.0900896	0.148867	0.113097	0.0153343	0.177489	0.166368	0.232398	0.137447	0.0343211	0.0133248	0.105085	0.194938	0.013861	FALSE	FALSE	FALSE	FALSE	FALSE	FALSE	FALSE	FALSE	FALSE	FALSE	FALSE	FALSE	FALSE	FALSE	FALSE	FALSE
YPL253C	FALSE	0.0819659	0.00518301	0.126123	0.155326	0.204773	0.187999	0.115971	0.108294	0.00934085	0.0855849	0.147394	0.15117	0.133084	0.122346	0.0946353	0.0059875	FALSE	FALSE	FALSE	FALSE	FALSE	FALSE	FALSE	FALSE	FALSE	FALSE	FALSE	FALSE	FALSE	FALSE	FALSE	FALSE
YIL087C	FALSE	0.0117076	0.0468834	0.122043	0.135644	0.1536	0.105144	0.0358233	0.0534842	0.00593195	0.0994682	0.0338377	0.0393123	0.0683411	0.0549029	0.133686	0.0547299	FALSE	FALSE	FALSE	FALSE	FALSE	FALSE	FALSE	FALSE	FALSE	FALSE	FALSE	FALSE	FALSE	FALSE	FALSE	FALSE
YKR068C	FALSE	0.0129907	0.0430235	0.0395749	0.063482	0.081103	0.0670646	0.0772967	0.0581358	0.0096067	0.0255818	0.0870533	0.0505141	0.0253873	0.0852421	0.0902906	0.0382341	FALSE	FALSE	FALSE	FALSE	FALSE	FALSE	FALSE	FALSE	FALSE	FALSE	FALSE	FALSE	FALSE	FALSE	FALSE	FALSE
YML017W	FALSE	0.120766	0.126998	0.138302	0.119851	0.00264367	0.0579361	0.0842614	0.0625148	0.076012	0.0966423	0.0460582	0.0740767	0.00280702	0.0572229	0.0421022	0.0017422	FALSE	FALSE	FALSE	FALSE	FALSE	FALSE	FALSE	FALSE	FALSE	FALSE	FALSE	FALSE	FALSE	FALSE	FALSE	FALSE
YJR030C	FALSE	0.399891	0.268365	0.1387	0.0315403	0.112522	0.264534	0.356595	0.440797	0.450488	0.358145	0.0768826	0.116209	0.182947	0.176269	0.117038	0.148616	TRUE	TRUE	FALSE	FALSE	FALSE	TRUE	TRUE	TRUE	TRUE	TRUE	FALSE	FALSE	FALSE	FALSE	FALSE	FALSE
YPL188W	FALSE	0.0404837	0.0131376	0.0898664	0.0984205	0.0949454	0.0616053	0.0397016	0.0912412	0.0572458	0.0312192	0.0175941	0.0571082	0.0488388	0.0163956	0.0489237	0.0280381	FALSE	FALSE	FALSE	FALSE	FALSE	FALSE	FALSE	FALSE	FALSE	FALSE	FALSE	FALSE	FALSE	FALSE	FALSE	FALSE
YLR056W	FALSE	0.147265	0.124483	0.117191	0.102083	0.0831737	0.0535714	0.0444052	0.043586	0.00376746	0.0795629	0.0599591	0.135069	0.140633	0.102494	0.0805473	0.134094	FALSE	FALSE	FALSE	FALSE	FALSE	FALSE	FALSE	FALSE	FALSE	FALSE	FALSE	FALSE	FALSE	FALSE	FALSE	FALSE
YDR434W	FALSE	0.0370341	0.00686695	0.00346124	0.00901953	0.0216119	0.00315294	0.0207616	0.0140055	0.0224833	0.0311364	0.0233518	0.0368263	0.0252742	0.0298017	0.0247823	0.0191456	FALSE	FALSE	FALSE	FALSE	FALSE	FALSE	FALSE	FALSE	FALSE	FALSE	FALSE	FALSE	FALSE	FALSE	FALSE	FALSE
YDR225W	FALSE	0.03795	0.328971	0.58235	0.487275	0.238513	0.0724722	0.0710798	0.296823	0.430499	0.547547	0.416683	0.504026	0.263119	0.0361527	0.200236	0.234971	FALSE	TRUE	TRUE	TRUE	FALSE	FALSE	FALSE	TRUE	TRUE	TRUE	TRUE	TRUE	TRUE	FALSE	FALSE	FALSE
YDR052C	TRUE	0.0404766	0.0185887	0.0787344	0.0163561	0.0434153	0.00648176	0.0247594	0.039032	0.0834921	0.0310217	0.010569	0.0108127	0.0124772	0.0355242	0.00296665	0.0320888	FALSE	FALSE	FALSE	FALSE	FALSE	FALSE	FALSE	FALSE	FALSE	FALSE	FALSE	FALSE	FALSE	FALSE	FALSE	FALSE
YDL046W	FALSE	0.0116165	0.0135741	0.048956	0.049954	0.0391842	0.0472398	0.00973173	0.0474517	0.0175114	0.0372342	0.0279474	0.00840402	0.00168351	0.0279158	0.0471057	0.0107522	FALSE	FALSE	FALSE	FALSE	FALSE	FALSE	FALSE	FALSE	FALSE	FALSE	FALSE	FALSE	FALSE	FALSE	FALSE	FALSE
YBR218C	FALSE	0.106148	0.0319562	0.0137912	0.0375996	0.0737125	0.067938	0.0584434	0.0497704	0.0232418	0.00493242	0.0111088	0.0362681	0.0537581	0.032042	0.00232162	0.00947493	FALSE	FALSE	FALSE	FALSE	FALSE	FALSE	FALSE	FALSE	FALSE	FALSE	FALSE	FALSE	FALSE	FALSE	FALSE	FALSE
YIL013C	FALSE	0.0239591	0.0188957	0.017052	0.00130359	0.00581404	0.0383788	0.0257714	0.045956	0.0067672	0.043317	0.035482	0.0285815	0.05354	0.00949392	0.00956397	0.00990868	FALSE	FALSE	FALSE	FALSE	FALSE	FALSE	FALSE	FALSE	FALSE	FALSE	FALSE	FALSE	FALSE	FALSE	FALSE	FALSE
YLR407W	FALSE	0.0459493	0.0211696	0.0980276	0.119072	0.0775037	0.0932629	0.0476492	0.00376433	0.00873264	0.0319844	0.11132	0.0530152	0.0313301	0.0797928	0.0550274	0.0107156	FALSE	FALSE	FALSE	FALSE	FALSE	FALSE	FALSE	FALSE	FALSE	FALSE	FALSE	FALSE	FALSE	FALSE	FALSE	FALSE
YFR040W	FALSE	0.00444023	0.0101787	0.0345819	0.039602	0.0567592	0.0942366	0.0617117	0.0414791	0.0416526	0.0125927	0.0682131	0.00768379	0.0280028	0.00201122	0.0133351	0.0553679	FALSE	FALSE	FALSE	FALSE	FALSE	FALSE	FALSE	FALSE	FALSE	FALSE	FALSE	FALSE	FALSE	FALSE	FALSE	FALSE
YHR196W	FALSE	0.0182319	0.0190497	0.0579901	0.0188008	0.0474171	0.0979419	0.0702651	0.0201583	0.0227142	0.0344414	0.0372221	0.0300783	0.0756244	0.0634495	0.0720392	0.100419	FALSE	FALSE	FALSE	FALSE	FALSE	FALSE	FALSE	FALSE	FALSE	FALSE	FALSE	FALSE	FALSE	FALSE	FALSE	FALSE
YDL210W	FALSE	0.068632	0.0957145	0.0141098	0.00328332	0.00675372	0.0378436	0.0553312	0.0517814	0.132994	0.0168328	0.0503842	0.0194521	0.00576222	0.0312731	0.0106167	0.0269005	FALSE	FALSE	FALSE	FALSE	FALSE	FALSE	FALSE	FALSE	FALSE	FALSE	FALSE	FALSE	FALSE	FALSE	FALSE	FALSE
YOR053W	FALSE	0.126623	0.0454184	0.020227	0.0633315	0.0215758	0.00612981	0.0161903	0.0388095	0.00291512	0.048019	0.07854	0.0209639	0.143191	0.0223123	0.0233354	0.00805961	FALSE	FALSE	FALSE	FALSE	FALSE	FALSE	FALSE	FALSE	FALSE	FALSE	FALSE	FALSE	FALSE	FALSE	FALSE	FALSE
YGR210C	FALSE	0.025044	0.0245921	0.00523624	0.0499828	0.00998646	0.00957648	0.00246877	0.0221669	0.0177145	0.0141425	0.0119504	0.0148231	0.00159237	0.012996	0.0139224	0.0170613	FALSE	FALSE	FALSE	FALSE	FALSE	FALSE	FALSE	FALSE	FALSE	FALSE	FALSE	FALSE	FALSE	FALSE	FALSE	FALSE
YML114C	FALSE	0.0558006	0.0238925	0.00215062	0.00636445	0.0564861	0.0319114	0.0832536	0.0361769	0.0325009	0.0192727	0.00425523	0.0275071	0.0616383	0.0295606	0.00738332	0.0157838	FALSE	FALSE	FALSE	FALSE	FALSE	FALSE	FALSE	FALSE	FALSE	FALSE	FALSE	FALSE	FALSE	FALSE	FALSE	FALSE
YJL110C	FALSE	0.0199258	0.00959521	0.0115703	0.0219073	0.0409169	0.0407368	0.0512599	0.00458261	0.0725231	0.00765311	0.0155128	0.0111295	0.0461483	0.0350846	0.038288	0.0365368	FALSE	FALSE	FALSE	FALSE	FALSE	FALSE	FALSE	FALSE	FALSE	FALSE	FALSE	FALSE	FALSE	FALSE	FALSE	FALSE
YER053C	FALSE	0.0561556	0.0864531	0.119555	0.11106	0.137779	0.117497	0.0508097	0.0578891	0.0500829	0.0738584	0.0704617	0.0735306	0.0834135	0.112424	0.125153	0.132053	FALSE	FALSE	FALSE	FALSE	FALSE	FALSE	FALSE	FALSE	FALSE	FALSE	FALSE	FALSE	FALSE	FALSE	FALSE	FALSE
YBR143C	FALSE	0.0503016	0.0393279	0.0483775	0.0438722	0.0382677	0.0396899	0.0323326	0.0134372	0.00205063	0.0493596	0.0497845	0.033996	0.0363457	0.0431398	0.056667	0.0205737	FALSE	FALSE	FALSE	FALSE	FALSE	FALSE	FALSE	FALSE	FALSE	FALSE	FALSE	FALSE	FALSE	FALSE	FALSE	FALSE
YDL076C	FALSE	0.070875	0.0394291	0.0201073	0.0915098	0.0522153	0.0987999	0.0627151	0.0603603	0.0092371	0.0346262	0.031216	0.0481633	0.0494514	0.0423535	0.00496712	0.00895684	FALSE	FALSE	FALSE	FALSE	FALSE	FALSE	FALSE	FALSE	FALSE	FALSE	FALSE	FALSE	FALSE	FALSE	FALSE	FALSE
YNL009W	FALSE	0.0232834	0.115	0.00229447	0.00216849	0.0562433	0.0583505	0.074847	0.00564329	0.00458147	0.029196	0.0521353	0.0300082	0.00759819	0.0912238	0.0474097	0.102972	FALSE	FALSE	FALSE	FALSE	FALSE	FALSE	FALSE	FALSE	FALSE	FALSE	FALSE	FALSE	FALSE	FALSE	FALSE	FALSE
YLR097C	FALSE	0.039975	0.00729061	0.0325446	0.0277476	0.0186332	0.0287994	0.0514832	0.0066666	0.0216587	0.0125399	0.00992737	0.039552	0.0119556	0.0444027	0.00645784	0.0106708	FALSE	FALSE	FALSE	FALSE	FALSE	FALSE	FALSE	FALSE	FALSE	FALSE	FALSE	FALSE	FALSE	FALSE	FALSE	FALSE
YLR384C	FALSE	0.0534831	0.0296145	0.0164416	0.00792584	0.0173177	0.0499019	0.041424	0.0289419	0.00342474	0.0265568	0.0582992	0.0216832	0.0354041	0.032711	0.0212875	0.0346937	FALSE	FALSE	FALSE	FALSE	FALSE	FALSE	FALSE	FALSE	FALSE	FALSE	FALSE	FALSE	FALSE	FALSE	FALSE	FALSE
YFR002W	FALSE	0.0342182	0.0827292	0.0737076	0.0229982	0.0146704	0.0125796	0.0183719	0.0433857	0.0635624	0.0733318	0.0831721	0.00339847	0.00373098	0.0137154	0.0240163	0.0167597	FALSE	FALSE	FALSE	FALSE	FALSE	FALSE	FALSE	FALSE	FALSE	FALSE	FALSE	FALSE	FALSE	FALSE	FALSE	FALSE
YDL120W	FALSE	0.0389218	0.0254125	0.00796973	0.0347788	0.0737022	0.0655438	0.042498	0.0556847	0.0547339	0.0104405	0.0801987	0.00269677	0.0248465	0.0484589	0.0422004	0.0124103	FALSE	FALSE	FALSE	FALSE	FALSE	FALSE	FALSE	FALSE	FALSE	FALSE	FALSE	FALSE	FALSE	FALSE	FALSE	FALSE
YOR017W	FALSE	0.0588976	0.0697309	0.0448956	0.0334588	0.0307434	0.0163211	0.115806	0.0874636	0.0629741	0.0606939	0.0572	0.00202563	0.0432777	0.00302941	0.0011002	0.00941511	FALSE	FALSE	FALSE	FALSE	FALSE	FALSE	FALSE	FALSE	FALSE	FALSE	FALSE	FALSE	FALSE	FALSE	FALSE	FALSE
YJR131W	FALSE	0.057881	0.0381767	0.0392785	0.00699088	0.0311838	0.0129783	0.0245739	0.0104833	0.00184911	0.0421819	0.00536438	0.0136229	0.00307291	0.00895486	0.0215263	0.0236346	FALSE	FALSE	FALSE	FALSE	FALSE	FALSE	FALSE	FALSE	FALSE	FALSE	FALSE	FALSE	FALSE	FALSE	FALSE	FALSE
YMR253C	FALSE	0.119739	0.17071	0.311482	0.196874	0.16112	0.102475	0.0139107	0.104676	0.196585	0.235107	0.161302	0.160792	0.157715	0.0821892	0.0623674	0.00939734	FALSE	FALSE	TRUE	FALSE	FALSE	FALSE	FALSE	FALSE	FALSE	FALSE	FALSE	FALSE	FALSE	FALSE	FALSE	FALSE
YFL030W	FALSE	0.0117448	0.0326456	0.0657237	0.0973775	0.12003	0.145437	0.00991071	0.0632601	0.0328576	0.0531513	0.0128173	0.0458618	0.0600617	0.0506557	0.086786	0.0550439	FALSE	FALSE	FALSE	FALSE	FALSE	FALSE	FALSE	FALSE	FALSE	FALSE	FALSE	FALSE	FALSE	FALSE	FALSE	FALSE
YLR081W	FALSE	0.0370464	0.0016193	0.0252681	0.0156376	0.0229272	0.00877896	0.016975	0.0485823	0.00213736	0.0486545	0.0237406	0.0410065	0.0111207	0.0230587	0.046851	0.00352428	FALSE	FALSE	FALSE	FALSE	FALSE	FALSE	FALSE	FALSE	FALSE	FALSE	FALSE	FALSE	FALSE	FALSE	FALSE	FALSE
YKR074W	FALSE	0.00969527	0.0110646	0.0394238	0.0111613	0.0524394	0.024015	0.0286418	0.00271772	0.0382265	0.00819211	0.0773679	0.0230747	0.0538529	0.0343135	0.0125341	0.00439032	FALSE	FALSE	FALSE	FALSE	FALSE	FALSE	FALSE	FALSE	FALSE	FALSE	FALSE	FALSE	FALSE	FALSE	FALSE	FALSE
YDR173C	FALSE	0.0246798	0.00687932	0.0256337	0.0290265	0.0254585	0.0376942	0.00817505	0.00896692	0.0134365	0.00745237	0.0301445	0.0268482	0.00514629	0.0138446	0.014116	0.0135277	FALSE	FALSE	FALSE	FALSE	FALSE	FALSE	FALSE	FALSE	FALSE	FALSE	FALSE	FALSE	FALSE	FALSE	FALSE	FALSE
YHR083W	FALSE	0.0891668	0.0577995	0.0917976	0.0593179	0.0269961	0.0157928	0.0134597	0.00682819	0.00204829	0.037319	0.0817781	0.004191	0.0146828	0.0917932	0.077372	0.044376	FALSE	FALSE	FALSE	FALSE	FALSE	FALSE	FALSE	FALSE	FALSE	FALSE	FALSE	FALSE	FALSE	FALSE	FALSE	FALSE
YOL058W	FALSE	0.442036	0.266312	0.12371	0.0495682	0.203406	0.253862	0.242334	0.256359	0.140844	0.0588996	0.00967675	0.0251941	0.0246325	0.0103198	0.00876706	0.027184	TRUE	TRUE	FALSE	FALSE	FALSE	TRUE	FALSE	TRUE	FALSE	FALSE	FALSE	FALSE	FALSE	FALSE	FALSE	FALSE
YHL024W	FALSE	0.0428571	0.0168938	0.0304277	0.00653604	0.0135105	0.0183471	0.0365803	0.0143865	0.0753523	0.0163186	0.00399653	0.0310874	0.021435	0.0297397	0.0698482	0.0228652	FALSE	FALSE	FALSE	FALSE	FALSE	FALSE	FALSE	FALSE	FALSE	FALSE	FALSE	FALSE	FALSE	FALSE	FALSE	FALSE
YOR323C	FALSE	0.0838781	0.0604332	0.0586453	0.0238494	0.00867595	0.0241542	0.0364612	0.0777409	0.0578116	0.0698306	0.00746278	0.0196801	0.00923368	0.0061631	0.00535751	0.0064523	FALSE	FALSE	FALSE	FALSE	FALSE	FALSE	FALSE	FALSE	FALSE	FALSE	FALSE	FALSE	FALSE	FALSE	FALSE	FALSE
YKR098C	FALSE	0.18883	0.263127	0.362903	0.28524	0.197084	0.00679876	0.150055	0.242679	0.298729	0.301141	0.228842	0.13404	0.119307	0.106435	0.00891489	0.032684	FALSE	TRUE	TRUE	TRUE	FALSE	FALSE	FALSE	FALSE	TRUE	TRUE	FALSE	FALSE	FALSE	FALSE	FALSE	FALSE
YER177W	FALSE	0.0451687	0.0358243	0.0448	0.0672978	0.0462681	0.0206112	0.0110761	0.0210473	0.0384585	0.0106283	0.0171767	0.0250512	0.0445523	0.0653166	0.0718357	0.0694944	FALSE	FALSE	FALSE	FALSE	FALSE	FALSE	FALSE	FALSE	FALSE	FALSE	FALSE	FALSE	FALSE	FALSE	FALSE	FALSE
YER180C-A	FALSE	0.00703869	0.00303357	0.0509433	0.00964597	0.00146307	0.0189644	0.0804059	0.0843375	0.0272284	0.0435038	0.0648253	0.00306407	0.00760169	0.0338233	0.0490373	0.00517087	FALSE	FALSE	FALSE	FALSE	FALSE	FALSE	FALSE	FALSE	FALSE	FALSE	FALSE	FALSE	FALSE	FALSE	FALSE	FALSE
YHR174W	FALSE	0.0639493	0.0394044	0.0468124	0.0280142	0.0476688	0.0294386	0.00883736	0.0263274	0.0117052	0.01429	0.0250993	0.0216267	0.0491034	0.00889852	0.0476069	0.0608465	FALSE	FALSE	FALSE	FALSE	FALSE	FALSE	FALSE	FALSE	FALSE	FALSE	FALSE	FALSE	FALSE	FALSE	FALSE	FALSE
YLR075W	FALSE	0.0129617	0.0211176	0.00246328	0.00378953	0.0578421	0.0335084	0.00275978	0.00798764	0.0107778	0.00913671	0.0255912	0.0353508	0.0399631	0.027268	0.00620012	0.0427281	FALSE	FALSE	FALSE	FALSE	FALSE	FALSE	FALSE	FALSE	FALSE	FALSE	FALSE	FALSE	FALSE	FALSE	FALSE	FALSE
YNL196C	FALSE	0.0548684	0.0379262	0.0197549	0.0340834	0.0356028	0.0641559	0.0971728	0.0380647	0.0106114	0.0194426	0.0621595	0.0384233	0.0129278	0.0265795	0.0200776	0.0269592	FALSE	FALSE	FALSE	FALSE	FALSE	FALSE	FALSE	FALSE	FALSE	FALSE	FALSE	FALSE	FALSE	FALSE	FALSE	FALSE
YGR125W	FALSE	0.0918154	0.0693198	0.0361921	0.0129107	0.0607817	0.0544077	0.0391391	0.063651	0.0382244	0.0185409	0.0461827	0.0214502	0.00681961	0.0104733	0.00690087	0.054461	FALSE	FALSE	FALSE	FALSE	FALSE	FALSE	FALSE	FALSE	FALSE	FALSE	FALSE	FALSE	FALSE	FALSE	FALSE	FALSE
YKL184W	FALSE	0.0259502	0.00350484	0.034825	0.0492334	0.0577587	0.0594402	0.00734042	0.00245154	0.00646586	0.0368525	0.0394189	0.0469735	0.0514882	0.00332807	0.00645742	0.0107303	FALSE	FALSE	FALSE	FALSE	FALSE	FALSE	FALSE	FALSE	FALSE	FALSE	FALSE	FALSE	FALSE	FALSE	FALSE	FALSE
YDL113C	FALSE	0.0358734	0.147983	0.183605	0.156331	0.131626	0.0786311	0.0552999	0.0476955	0.125722	0.141171	0.0895039	0.125339	0.0853416	0.0757484	0.085329	0.0707419	FALSE	FALSE	FALSE	FALSE	FALSE	FALSE	FALSE	FALSE	FALSE	FALSE	FALSE	FALSE	FALSE	FALSE	FALSE	FALSE
YDL077C	FALSE	0.0763463	0.0482485	0.0575829	0.032687	0.00860693	0.057989	0.0164953	0.0452263	0.0531916	0.0709353	0.0301112	0.0765575	0.00910796	0.0116104	0.046772	0.0353071	FALSE	FALSE	FALSE	FALSE	FALSE	FALSE	FALSE	FALSE	FALSE	FALSE	FALSE	FALSE	FALSE	FALSE	FALSE	FALSE
YER050C	FALSE	0.0339562	0.0691986	0.129548	0.113103	0.0902884	0.056127	0.0707452	0.0133874	0.0542318	0.0587394	0.16833	0.102976	0.0506577	0.0872459	0.0307107	0.00835981	FALSE	FALSE	FALSE	FALSE	FALSE	FALSE	FALSE	FALSE	FALSE	FALSE	FALSE	FALSE	FALSE	FALSE	FALSE	FALSE
YMR056C	FALSE	0.0616478	0.0780782	0.0849202	0.0875945	0.0600395	0.0621389	0.104304	0.0140407	0.0974261	0.0331728	0.108218	0.0756232	0.127464	0.0285513	0.0395418	0.0597492	FALSE	FALSE	FALSE	FALSE	FALSE	FALSE	FALSE	FALSE	FALSE	FALSE	FALSE	FALSE	FALSE	FALSE	FALSE	FALSE
YPR117W	FALSE	0.00295417	0.0474406	0.111457	0.0684505	0.00690706	0.0509776	0.0492539	0.0775942	0.0784946	0.00835195	0.0257915	0.0309606	0.0158105	0.0078169	0.00978494	0.00675006	FALSE	FALSE	FALSE	FALSE	FALSE	FALSE	FALSE	FALSE	FALSE	FALSE	FALSE	FALSE	FALSE	FALSE	FALSE	FALSE
YDR261C-D	FALSE	0.0189397	0.0300007	0.130467	0.0940745	0.138463	0.136317	0.104285	0.0768004	0.083863	0.0124488	0.141268	0.0671342	0.115304	0.127044	0.134994	0.142066	FALSE	FALSE	FALSE	FALSE	FALSE	FALSE	FALSE	FALSE	FALSE	FALSE	FALSE	FALSE	FALSE	FALSE	FALSE	FALSE
YDR363W-A	FALSE	0.0151862	0.0189227	0.111068	0.169913	0.125433	0.120681	0.107873	0.0121591	0.0269717	0.0767817	0.112334	0.09418	0.0942973	0.0655474	0.0704094	0.0589529	FALSE	FALSE	FALSE	FALSE	FALSE	FALSE	FALSE	FALSE	FALSE	FALSE	FALSE	FALSE	FALSE	FALSE	FALSE	FALSE
YLR185W	FALSE	0.0137584	0.0125163	0.0427949	0.0369731	0.0670007	0.0263864	0.0158216	0.0123272	0.0906032	0.0215269	0.0387967	0.0344732	0.0454762	0.0439871	0.00800606	0.0462447	FALSE	FALSE	FALSE	FALSE	FALSE	FALSE	FALSE	FALSE	FALSE	FALSE	FALSE	FALSE	FALSE	FALSE	FALSE	FALSE
YJL060W	FALSE	0.0465058	0.0384144	0.0356234	0.11694	0.0845644	0.0848929	0.0531321	0.00313555	0.0183718	0.0764356	0.0589801	0.0402454	0.034638	0.0374705	0.0198317	0.0210161	FALSE	FALSE	FALSE	FALSE	FALSE	FALSE	FALSE	FALSE	FALSE	FALSE	FALSE	FALSE	FALSE	FALSE	FALSE	FALSE
YGR249W	FALSE	0.038436	0.00706476	0.0509812	0.0132682	0.0724147	0.0641766	0.0608506	0.0356151	0.009252	0.00762169	0.161698	0.0107299	0.0259481	0.0650305	0.0122528	0.0347176	FALSE	FALSE	FALSE	FALSE	FALSE	FALSE	FALSE	FALSE	FALSE	FALSE	FALSE	FALSE	FALSE	FALSE	FALSE	FALSE
YPR033C	FALSE	0.0296896	0.0274232	0.027401	0.0201516	0.0102896	0.0162649	0.0104359	0.0268407	0.0365139	0.0481605	0.0407181	0.00517205	0.00839339	0.00145157	0.00810682	0.00298115	FALSE	FALSE	FALSE	FALSE	FALSE	FALSE	FALSE	FALSE	FALSE	FALSE	FALSE	FALSE	FALSE	FALSE	FALSE	FALSE
YDL014W	FALSE	0.0268401	0.0588093	0.0817501	0.132544	0.0807441	0.081363	0.0927934	0.0229035	0.0432593	0.0120707	0.128816	0.0764625	0.0390008	0.129259	0.0829407	0.039557	FALSE	FALSE	FALSE	FALSE	FALSE	FALSE	FALSE	FALSE	FALSE	FALSE	FALSE	FALSE	FALSE	FALSE	FALSE	FALSE
YNR069C	FALSE	0.0556376	0.0364707	0.12612	0.0700238	0.020197	0.0268718	0.0593576	0.0650687	0.0702666	0.122345	0.0385468	0.026038	0.0247197	0.0618406	0.00631279	0.00363697	FALSE	FALSE	FALSE	FALSE	FALSE	FALSE	FALSE	FALSE	FALSE	FALSE	FALSE	FALSE	FALSE	FALSE	FALSE	FALSE
YDL234C	FALSE	0.0610379	0.0769586	0.063065	0.0489194	0.0483863	0.00340064	0.0299285	0.0709105	0.0926331	0.0433959	0.0201528	0.0226841	0.0201778	0.0394485	0.0128397	0.0112663	FALSE	FALSE	FALSE	FALSE	FALSE	FALSE	FALSE	FALSE	FALSE	FALSE	FALSE	FALSE	FALSE	FALSE	FALSE	FALSE
YDR207C	FALSE	0.033538	0.0784151	0.157293	0.148162	0.15214	0.159222	0.117789	0.0973995	0.0174962	0.0536918	0.117817	0.135052	0.153447	0.1822	0.153945	0.0929247	FALSE	FALSE	FALSE	FALSE	FALSE	FALSE	FALSE	FALSE	FALSE	FALSE	FALSE	FALSE	FALSE	FALSE	FALSE	FALSE
YJR052W	FALSE	0.0186156	0.0477756	0.0282102	0.0147474	0.0314652	0.00350727	0.00313877	0.0248861	0.0363881	0.0274469	0.0347568	0.0316168	0.0356631	0.0570563	0.017332	0.0249404	FALSE	FALSE	FALSE	FALSE	FALSE	FALSE	FALSE	FALSE	FALSE	FALSE	FALSE	FALSE	FALSE	FALSE	FALSE	FALSE
YLR279W	FALSE	0.224285	0.144133	0.228358	0.115589	0.00810396	0.0306106	0.150287	0.0961604	0.0874447	0.199807	0.252092	0.117564	0.0631077	0.202809	0.0922633	0.0443433	FALSE	FALSE	FALSE	FALSE	FALSE	FALSE	FALSE	FALSE	FALSE	FALSE	TRUE	FALSE	FALSE	FALSE	FALSE	FALSE
YDL081C	FALSE	0.00249041	0.0140226	0.0151996	0.0132729	0.047062	0.0475138	0.00418765	0.0255812	0.0113067	0.0611817	0.0199306	0.0031263	0.0408013	0.0307258	0.0101892	0.017923	FALSE	FALSE	FALSE	FALSE	FALSE	FALSE	FALSE	FALSE	FALSE	FALSE	FALSE	FALSE	FALSE	FALSE	FALSE	FALSE
YHL016C	FALSE	0.0042296	0.0369089	0.0106082	0.0559231	0.0433536	0.0233631	0.0303925	0.0211408	0.0359674	0.05806	0.0016302	0.0055159	0.00663009	0.0320582	0.0133995	0.00609923	FALSE	FALSE	FALSE	FALSE	FALSE	FALSE	FALSE	FALSE	FALSE	FALSE	FALSE	FALSE	FALSE	FALSE	FALSE	FALSE
YPL052W	FALSE	0.0914977	0.0548864	0.0920739	0.0778633	0.0208279	0.00148122	0.0369864	0.118085	0.132624	0.102051	0.00184691	0.041377	0.0371923	0.046797	0.0150149	0.0270622	FALSE	FALSE	FALSE	FALSE	FALSE	FALSE	FALSE	FALSE	FALSE	FALSE	FALSE	FALSE	FALSE	FALSE	FALSE	FALSE
YMR166C	FALSE	0.0787226	0.0457613	0.0108978	0.0135446	0.0551607	0.0733732	0.0375544	0.0934954	0.0653121	0.031814	0.00887111	0.0120663	0.0366897	0.0301362	0.0109235	0.0561974	FALSE	FALSE	FALSE	FALSE	FALSE	FALSE	FALSE	FALSE	FALSE	FALSE	FALSE	FALSE	FALSE	FALSE	FALSE	FALSE
YJL134W	FALSE	0.0560834	0.0368252	0.103275	0.0819474	0.0648565	0.0230491	0.00357876	0.00911564	0.0257966	0.053932	0.0562512	0.0548549	0.0438203	0.0343166	0.0108832	0.0179685	FALSE	FALSE	FALSE	FALSE	FALSE	FALSE	FALSE	FALSE	FALSE	FALSE	FALSE	FALSE	FALSE	FALSE	FALSE	FALSE
YDL175C	FALSE	0.0168818	0.0187472	0.015246	0.0100231	0.0267483	0.0453769	0.018026	0.0369142	0.0414237	0.0223468	0.028884	0.0698553	0.0159578	0.0689691	0.0295609	0.0082724	FALSE	FALSE	FALSE	FALSE	FALSE	FALSE	FALSE	FALSE	FALSE	FALSE	FALSE	FALSE	FALSE	FALSE	FALSE	FALSE
YMR158W	FALSE	0.0237236	0.0224983	0.0811974	0.134469	0.1336	0.0624019	0.029771	0.0189752	0.00272255	0.0366413	0.181197	0.0736987	0.0469283	0.0875135	0.0587862	0.00619062	FALSE	FALSE	FALSE	FALSE	FALSE	FALSE	FALSE	FALSE	FALSE	FALSE	FALSE	FALSE	FALSE	FALSE	FALSE	FALSE
YOR289W	FALSE	0.141585	0.0415134	0.00380604	0.0254934	0.0839005	0.0513154	0.0368243	0.0463962	0.131042	0.125641	0.286599	0.0523721	0.0705712	0.142784	0.0259875	0.144949	FALSE	FALSE	FALSE	FALSE	FALSE	FALSE	FALSE	FALSE	FALSE	FALSE	TRUE	FALSE	FALSE	FALSE	FALSE	FALSE
YPR061C	FALSE	0.00677713	0.0908426	0.134029	0.0132403	0.0730057	0.0958549	0.0160414	0.0488838	0.0322989	0.0601925	0.0484687	0.0620554	0.0878567	0.0662937	0.0199773	0.0563495	FALSE	FALSE	FALSE	FALSE	FALSE	FALSE	FALSE	FALSE	FALSE	FALSE	FALSE	FALSE	FALSE	FALSE	FALSE	FALSE
YBR012C	FALSE	0.211075	0.102949	0.0326478	0.0040764	0.0143325	0.0457595	0.093995	0.0739382	0.0187345	0.018373	0.0122476	0.00504018	0.00636298	0.0947025	0.0127628	0.0159047	FALSE	FALSE	FALSE	FALSE	FALSE	FALSE	FALSE	FALSE	FALSE	FALSE	FALSE	FALSE	FALSE	FALSE	FALSE	FALSE
YGR280C	FALSE	0.0262705	0.0609386	0.121724	0.0153084	0.022347	0.00375635	0.0202944	0.0469932	0.0159136	0.0235741	0.0752286	0.0628335	0.0233722	0.114288	0.0862124	0.0904064	FALSE	FALSE	FALSE	FALSE	FALSE	FALSE	FALSE	FALSE	FALSE	FALSE	FALSE	FALSE	FALSE	FALSE	FALSE	FALSE
YDL060W	FALSE	0.0162161	0.0272641	0.0401091	0.0357403	0.0462425	0.0352215	0.0302917	0.0067326	0.0260729	0.0356089	0.00355119	0.00328705	0.0643123	0.0310602	0.0329461	0.0344129	FALSE	FALSE	FALSE	FALSE	FALSE	FALSE	FALSE	FALSE	FALSE	FALSE	FALSE	FALSE	FALSE	FALSE	FALSE	FALSE
YPL229W	FALSE	0.0616819	0.0542493	0.0765851	0.0466526	0.0438889	0.0045746	0.0039671	0.0611513	0.0649847	0.0770559	0.00829138	0.0811811	0.0629487	0.0458089	0.00824317	0.0436448	FALSE	FALSE	FALSE	FALSE	FALSE	FALSE	FALSE	FALSE	FALSE	FALSE	FALSE	FALSE	FALSE	FALSE	FALSE	FALSE
YOL066C	FALSE	0.0282752	0.00500778	0.00850224	0.0458088	0.0200527	0.0163511	0.00341987	0.0188108	0.0136461	0.00673033	0.0227807	0.0270037	0.00595388	0.00467584	0.0103061	0.0171158	FALSE	FALSE	FALSE	FALSE	FALSE	FALSE	FALSE	FALSE	FALSE	FALSE	FALSE	FALSE	FALSE	FALSE	FALSE	FALSE
YLR048W	FALSE	0.00201733	0.0152529	0.0199422	0.00300656	0.00148597	0.00221654	0.00972585	0.00850884	0.0361016	0.0707025	0.0256128	0.022237	0.016012	0.0313869	0.0259049	0.00111262	FALSE	FALSE	FALSE	FALSE	FALSE	FALSE	FALSE	FALSE	FALSE	FALSE	FALSE	FALSE	FALSE	FALSE	FALSE	FALSE
YER073W	FALSE	0.0419673	0.0174539	0.0277348	0.00520559	0.0144914	0.0012446	0.0105999	0.0431886	0.0468217	0.00776864	0.027319	0.0142017	0.0249324	0.0224282	0.0163765	0.0153183	FALSE	FALSE	FALSE	FALSE	FALSE	FALSE	FALSE	FALSE	FALSE	FALSE	FALSE	FALSE	FALSE	FALSE	FALSE	FALSE
YNL241C	FALSE	0.0521505	0.0495123	0.115054	0.038827	0.0445915	0.00705346	0.0103189	0.0363612	0.0140005	0.0650633	0.0285188	0.0337749	0.0817042	0.00248585	0.0226887	0.0736779	FALSE	FALSE	FALSE	FALSE	FALSE	FALSE	FALSE	FALSE	FALSE	FALSE	FALSE	FALSE	FALSE	FALSE	FALSE	FALSE
YOL128C	FALSE	0.0328564	0.0636518	0.0681897	0.123458	0.105973	0.0988747	0.0866477	0.0443449	0.0253054	0.0387601	0.126245	0.0690346	0.108986	0.148791	0.075753	0.00587131	FALSE	FALSE	FALSE	FALSE	FALSE	FALSE	FALSE	FALSE	FALSE	FALSE	FALSE	FALSE	FALSE	FALSE	FALSE	FALSE
YMR132C	FALSE	0.187902	0.0583707	0.0114176	0.079993	0.111046	0.103562	0.177287	0.154912	0.110556	0.0629269	0.0543171	0.0662456	0.134529	0.0578513	0.120096	0.0495589	FALSE	FALSE	FALSE	FALSE	FALSE	FALSE	FALSE	FALSE	FALSE	FALSE	FALSE	FALSE	FALSE	FALSE	FALSE	FALSE
YBR073W	FALSE	0.282103	0.199693	0.165818	0.0845923	0.0248262	0.0525813	0.218583	0.265827	0.314222	0.259146	0.195037	0.0148887	0.0623639	0.0552095	0.0362978	0.0864369	TRUE	FALSE	FALSE	FALSE	FALSE	FALSE	FALSE	TRUE	TRUE	TRUE	FALSE	FALSE	FALSE	FALSE	FALSE	FALSE
YMR156C	FALSE	0.0039508	0.0255379	0.0114852	0.0219893	0.0494228	0.111257	0.0835983	0.0746372	0.0509777	0.134134	0.00396768	0.0467805	0.0688057	0.007806	0.0865657	0.0609649	FALSE	FALSE	FALSE	FALSE	FALSE	FALSE	FALSE	FALSE	FALSE	FALSE	FALSE	FALSE	FALSE	FALSE	FALSE	FALSE
YNL296W	FALSE	0.0170232	0.0274495	0.192732	0.0802282	0.0949714	0.139542	0.0814802	0.0314617	0.00208124	0.0162697	0.026798	0.0932972	0.00581582	0.225414	0.0209305	0.023508	FALSE	FALSE	FALSE	FALSE	FALSE	FALSE	FALSE	FALSE	FALSE	FALSE	FALSE	FALSE	FALSE	FALSE	FALSE	FALSE
YGR144W	FALSE	0.0729089	0.0720399	0.0936409	0.0203673	0.0245756	0.107915	0.0780255	0.0815228	0.059031	0.0411876	0.167787	0.0258292	0.0582413	0.0435268	0.184108	0.0968786	FALSE	FALSE	FALSE	FALSE	FALSE	FALSE	FALSE	FALSE	FALSE	FALSE	FALSE	FALSE	FALSE	FALSE	FALSE	FALSE
YLR126C	FALSE	0.12219	0.0998204	0.0883096	0.0232799	0.039889	0.114658	0.122607	0.101338	0.102727	0.00188447	0.0492819	0.00152574	0.0468793	0.0187349	0.0529955	0.0111492	FALSE	FALSE	FALSE	FALSE	FALSE	FALSE	FALSE	FALSE	FALSE	FALSE	FALSE	FALSE	FALSE	FALSE	FALSE	FALSE
YNL323W	FALSE	0.00594543	0.0498014	0.0535754	0.0563614	0.00351139	0.0405837	0.0556737	0.0177783	0.0433456	0.0115772	0.00157938	0.0035127	0.0327999	0.0109211	0.0122273	0.0162903	FALSE	FALSE	FALSE	FALSE	FALSE	FALSE	FALSE	FALSE	FALSE	FALSE	FALSE	FALSE	FALSE	FALSE	FALSE	FALSE
YKR078W	FALSE	0.0547305	0.0158622	0.0838824	0.0388482	0.0105265	0.0130453	0.0211157	0.0577016	0.0848338	0.0854175	0.00332384	0.00424667	0.0177536	0.0098076	0.0268773	0.0215542	FALSE	FALSE	FALSE	FALSE	FALSE	FALSE	FALSE	FALSE	FALSE	FALSE	FALSE	FALSE	FALSE	FALSE	FALSE	FALSE
YER142C	FALSE	0.0746118	0.150118	0.150013	0.179397	0.131696	0.10309	0.0608517	0.0409064	0.0129492	0.0641041	0.134542	0.131465	0.130377	0.0969865	0.0735339	0.0959926	FALSE	FALSE	FALSE	FALSE	FALSE	FALSE	FALSE	FALSE	FALSE	FALSE	FALSE	FALSE	FALSE	FALSE	FALSE	FALSE
YLR300W	FALSE	0.0733285	0.0405193	0.155142	0.224119	0.191593	0.0743367	0.0797946	0.248235	0.33836	0.248879	0.0114286	0.0153742	0.00125195	0.0252793	0.0509695	0.0714612	FALSE	FALSE	FALSE	FALSE	FALSE	FALSE	FALSE	FALSE	TRUE	FALSE	FALSE	FALSE	FALSE	FALSE	FALSE	FALSE
YGL088W	FALSE	0.290743	0.127466	0.403698	0.384718	0.262827	0.0791887	0.001854	0.0356364	0.0404848	0.446825	0.0296065	0.0955408	0.165085	0.110859	0.0673472	0.00146961	TRUE	FALSE	TRUE	TRUE	TRUE	FALSE	FALSE	FALSE	FALSE	TRUE	FALSE	FALSE	FALSE	FALSE	FALSE	FALSE
YOL136C	FALSE	0.0697867	0.017012	0.0117782	0.0226651	0.0357903	0.0660198	0.0538924	0.0896924	0.0766593	0.00632996	0.0253553	0.0663164	0.0562459	0.0383852	0.0521275	0.100327	FALSE	FALSE	FALSE	FALSE	FALSE	FALSE	FALSE	FALSE	FALSE	FALSE	FALSE	FALSE	FALSE	FALSE	FALSE	FALSE
YBL086C	FALSE	0.0430159	0.048577	0.04153	0.0683443	0.0668081	0.077428	0.127966	0.118854	0.0458731	0.0408531	0.044655	0.0205554	0.0962442	0.0461767	0.106839	0.00229335	FALSE	FALSE	FALSE	FALSE	FALSE	FALSE	FALSE	FALSE	FALSE	FALSE	FALSE	FALSE	FALSE	FALSE	FALSE	FALSE
YLR016C	FALSE	0.016024	0.00321684	0.0339805	0.0157055	0.0295205	0.0151862	0.0132256	0.00196232	0.00265677	0.0456257	0.00369993	0.0434546	0.00432164	0.0246037	0.0303592	0.0428355	FALSE	FALSE	FALSE	FALSE	FALSE	FALSE	FALSE	FALSE	FALSE	FALSE	FALSE	FALSE	FALSE	FALSE	FALSE	FALSE
YDL051W	FALSE	0.00365785	0.0191168	0.0864803	0.0482858	0.0361522	0.0412907	0.017062	0.00298041	0.0166899	0.0185122	0.0174095	0.0299783	0.0457342	0.0357351	0.0435994	0.0565594	FALSE	FALSE	FALSE	FALSE	FALSE	FALSE	FALSE	FALSE	FALSE	FALSE	FALSE	FALSE	FALSE	FALSE	FALSE	FALSE
YNL257C	FALSE	0.026651	0.0349975	0.0160667	0.034052	0.00219859	0.00777047	0.00827052	0.0187176	0.0279133	0.0570803	0.0474365	0.00253083	0.0235658	0.00885964	0.0164928	0.0307291	FALSE	FALSE	FALSE	FALSE	FALSE	FALSE	FALSE	FALSE	FALSE	FALSE	FALSE	FALSE	FALSE	FALSE	FALSE	FALSE
YNL183C	FALSE	0.00901843	0.0194444	0.103985	0.0381975	0.00365593	0.0166515	0.0101343	0.01184	0.00340574	0.00184645	0.00341162	0.0296905	0.0458842	0.0519486	0.00366709	0.0465749	FALSE	FALSE	FALSE	FALSE	FALSE	FALSE	FALSE	FALSE	FALSE	FALSE	FALSE	FALSE	FALSE	FALSE	FALSE	FALSE
YNL240C	FALSE	0.0536601	0.0897138	0.109222	0.0615322	0.0302242	0.0229346	0.06635	0.0222835	0.0333512	0.0728501	0.0542664	0.0622407	0.0532071	0.143005	0.0837116	0.0719152	FALSE	FALSE	FALSE	FALSE	FALSE	FALSE	FALSE	FALSE	FALSE	FALSE	FALSE	FALSE	FALSE	FALSE	FALSE	FALSE
YPL249C-A	FALSE	0.0493925	0.0357863	0.0441549	0.0503141	0.0824304	0.073118	0.028917	0.0152472	0.023462	0.0967234	0.0285683	0.078862	0.0615451	0.0307595	0.0564303	0.0301446	FALSE	FALSE	FALSE	FALSE	FALSE	FALSE	FALSE	FALSE	FALSE	FALSE	FALSE	FALSE	FALSE	FALSE	FALSE	FALSE
YDR376W	FALSE	0.00824673	0.00347968	0.0193887	0.0487446	0.0559811	0.0546272	0.0139314	0.0152398	0.0421153	0.0125916	0.0547949	0.0221984	0.00434672	0.0423931	0.0377905	0.00153614	FALSE	FALSE	FALSE	FALSE	FALSE	FALSE	FALSE	FALSE	FALSE	FALSE	FALSE	FALSE	FALSE	FALSE	FALSE	FALSE
YGL045W	FALSE	0.0297411	0.057012	0.0876447	0.0554594	0.100706	0.033009	0.00979992	0.0658512	0.0434379	0.0110894	0.0796612	0.0774776	0.0724095	0.0419329	0.0370947	0.0346565	FALSE	FALSE	FALSE	FALSE	FALSE	FALSE	FALSE	FALSE	FALSE	FALSE	FALSE	FALSE	FALSE	FALSE	FALSE	FALSE
YOL027C	FALSE	0.0166962	0.0150632	0.0840419	0.00732058	0.0427512	0.0532093	0.050538	0.00139611	0.0486755	0.0139812	0.0177687	0.0117142	0.0760026	0.0694769	0.0595822	0.0612494	FALSE	FALSE	FALSE	FALSE	FALSE	FALSE	FALSE	FALSE	FALSE	FALSE	FALSE	FALSE	FALSE	FALSE	FALSE	FALSE
YCR075C	FALSE	0.00158446	0.0733273	0.112226	0.0986291	0.071614	0.0381081	0.0107745	0.052674	0.119802	0.152278	0.0407929	0.137609	0.0568795	0.0114922	0.0323898	0.0595027	FALSE	FALSE	FALSE	FALSE	FALSE	FALSE	FALSE	FALSE	FALSE	FALSE	FALSE	FALSE	FALSE	FALSE	FALSE	FALSE
YGR146C	FALSE	0.0221942	0.0532775	0.0425577	0.0427945	0.0381706	0.0521665	0.0316607	0.00238306	0.0647569	0.00969184	0.0734477	0.0228715	0.0210095	0.0906063	0.0728112	0.0189694	FALSE	FALSE	FALSE	FALSE	FALSE	FALSE	FALSE	FALSE	FALSE	FALSE	FALSE	FALSE	FALSE	FALSE	FALSE	FALSE
YDR343C	FALSE	0.142067	0.236428	0.0212806	0.00445259	0.0204238	0.170857	0.276522	0.0790753	0.0564537	0.117616	0.262877	0.077528	0.10181	0.243279	0.246809	0.0538141	FALSE	FALSE	FALSE	FALSE	FALSE	FALSE	TRUE	FALSE	FALSE	FALSE	TRUE	FALSE	FALSE	FALSE	FALSE	FALSE
YBL037W	FALSE	0.0821108	0.00807081	0.0264334	0.0761488	0.0933717	0.0851158	0.0922021	0.0366223	0.0657362	0.0178636	0.0576312	0.0537714	0.0746914	0.0473428	0.0550962	0.0399056	FALSE	FALSE	FALSE	FALSE	FALSE	FALSE	FALSE	FALSE	FALSE	FALSE	FALSE	FALSE	FALSE	FALSE	FALSE	FALSE
YDR094W	FALSE	0.0847619	0.10138	0.129833	0.00552638	0.00898598	0.061831	0.0768696	0.0357272	0.00536015	0.0573398	0.128595	0.0602452	0.00440088	0.0813197	0.0513109	0.0204778	FALSE	FALSE	FALSE	FALSE	FALSE	FALSE	FALSE	FALSE	FALSE	FALSE	FALSE	FALSE	FALSE	FALSE	FALSE	FALSE
YNL038W	FALSE	0.00810905	0.0238872	0.0175481	0.0286791	0.0282684	0.0158116	0.0138787	0.0123289	0.0314241	0.00597643	0.00239151	0.0520293	0.0445753	0.0435227	0.010803	0.00668531	FALSE	FALSE	FALSE	FALSE	FALSE	FALSE	FALSE	FALSE	FALSE	FALSE	FALSE	FALSE	FALSE	FALSE	FALSE	FALSE
YKR016W	FALSE	0.118395	0.111959	0.0941246	0.0804194	0.020213	0.00434885	0.0508258	0.0388923	0.08063	0.129615	0.0983101	0.057395	0.0365365	0.0366601	0.00739912	0.0202431	FALSE	FALSE	FALSE	FALSE	FALSE	FALSE	FALSE	FALSE	FALSE	FALSE	FALSE	FALSE	FALSE	FALSE	FALSE	FALSE
YMR126C	FALSE	0.0199461	0.00597948	0.0273738	0.0687753	0.0679085	0.0139696	0.0692754	0.00864642	0.0228694	0.0985836	0.0122514	0.056177	0.0607011	0.00979556	0.0332501	0.0253312	FALSE	FALSE	FALSE	FALSE	FALSE	FALSE	FALSE	FALSE	FALSE	FALSE	FALSE	FALSE	FALSE	FALSE	FALSE	FALSE
YBR071W	FALSE	0.412899	0.225902	0.0653651	0.117501	0.310031	0.422833	0.559647	0.785466	0.520775	0.0740555	0.203723	0.312823	0.303974	0.249808	0.179749	0.158586	TRUE	FALSE	FALSE	FALSE	TRUE	TRUE	TRUE	TRUE	TRUE	FALSE	FALSE	TRUE	TRUE	FALSE	FALSE	FALSE
YPR144C	FALSE	0.0374815	0.0264135	0.0777297	0.11431	0.101964	0.111347	0.0698832	0.0158662	0.0620929	0.050124	0.0308364	0.074385	0.0995299	0.0662139	0.0704069	0.0630627	FALSE	FALSE	FALSE	FALSE	FALSE	FALSE	FALSE	FALSE	FALSE	FALSE	FALSE	FALSE	FALSE	FALSE	FALSE	FALSE
YDR420W	FALSE	0.0150951	0.0241229	0.0182731	0.0841777	0.115484	0.108999	0.0720016	0.0153541	0.00291031	0.074868	0.0675061	0.0849585	0.0936275	0.0624777	0.0456686	0.00836757	FALSE	FALSE	FALSE	FALSE	FALSE	FALSE	FALSE	FALSE	FALSE	FALSE	FALSE	FALSE	FALSE	FALSE	FALSE	FALSE
YLR221C	FALSE	0.0583073	0.0530426	0.0700607	0.0123958	0.024338	0.0206295	0.0487648	0.0332356	0.00848614	0.00381639	0.0802145	0.0296316	0.00249294	0.0530657	0.0573546	0.0191201	FALSE	FALSE	FALSE	FALSE	FALSE	FALSE	FALSE	FALSE	FALSE	FALSE	FALSE	FALSE	FALSE	FALSE	FALSE	FALSE
YOL024W	FALSE	0.103924	0.101909	0.0408136	0.115824	0.0841518	0.0370306	0.20184	0.19589	0.0522455	0.0259889	0.0203527	0.105087	0.0333157	0.0591166	0.106738	0.0483183	FALSE	FALSE	FALSE	FALSE	FALSE	FALSE	FALSE	FALSE	FALSE	FALSE	FALSE	FALSE	FALSE	FALSE	FALSE	FALSE
YFL034W	FALSE	0.0896856	0.0453063	0.0360843	0.0687247	0.0472199	0.00322158	0.0515635	0.0491294	0.0950992	0.0753884	0.0360328	0.0536326	0.0245692	0.0111405	0.0063413	0.0121081	FALSE	FALSE	FALSE	FALSE	FALSE	FALSE	FALSE	FALSE	FALSE	FALSE	FALSE	FALSE	FALSE	FALSE	FALSE	FALSE
YDR398W	FALSE	0.0650871	0.0631771	0.0990415	0.00188438	0.0256368	0.0462849	0.0152752	0.0491318	0.0794084	0.0357613	0.0390868	0.0471066	0.0785106	0.0231229	0.0127887	0.0721615	FALSE	FALSE	FALSE	FALSE	FALSE	FALSE	FALSE	FALSE	FALSE	FALSE	FALSE	FALSE	FALSE	FALSE	FALSE	FALSE
YNL287W	FALSE	0.00897862	0.00442154	0.0247631	0.0362233	0.048163	0.0478867	0.0102673	0.0408195	0.01458	0.0801666	0.0091426	0.0303091	0.0223758	0.00701932	0.00864697	0.00275374	FALSE	FALSE	FALSE	FALSE	FALSE	FALSE	FALSE	FALSE	FALSE	FALSE	FALSE	FALSE	FALSE	FALSE	FALSE	FALSE
YGR079W	FALSE	0.107548	0.124924	0.18862	0.153137	0.17379	0.155329	0.0816086	0.00941323	0.0734139	0.137285	0.163196	0.14325	0.129098	0.154079	0.129602	0.0810384	FALSE	FALSE	FALSE	FALSE	FALSE	FALSE	FALSE	FALSE	FALSE	FALSE	FALSE	FALSE	FALSE	FALSE	FALSE	FALSE
YER170W	FALSE	0.194732	0.176633	0.141477	0.040562	0.0652551	0.085034	0.142434	0.201448	0.225986	0.111591	0.0720518	0.0581193	0.0132628	0.0663756	0.0467496	0.0682734	FALSE	FALSE	FALSE	FALSE	FALSE	FALSE	FALSE	FALSE	FALSE	FALSE	FALSE	FALSE	FALSE	FALSE	FALSE	FALSE
YGL154C	FALSE	0.0325853	0.0319832	0.00949887	0.0351739	0.0289221	0.0586527	0.0630341	0.0631776	0.0302366	0.00856377	0.0610831	0.0372851	0.0196808	0.0478321	0.0482338	0.0224412	FALSE	FALSE	FALSE	FALSE	FALSE	FALSE	FALSE	FALSE	FALSE	FALSE	FALSE	FALSE	FALSE	FALSE	FALSE	FALSE
YKL183W	FALSE	0.157248	0.110617	0.0211961	0.101568	0.10644	0.136528	0.214277	0.215626	0.122159	0.156686	0.0652281	0.0384815	0.0612924	0.13015	0.210698	0.146957	FALSE	FALSE	FALSE	FALSE	FALSE	FALSE	FALSE	FALSE	FALSE	FALSE	FALSE	FALSE	FALSE	FALSE	FALSE	FALSE
YDL198C	FALSE	0.440369	0.240669	0.124395	0.0438342	0.0388684	0.10415	0.094247	0.128455	0.101398	0.082193	0.169015	0.0841879	0.0799767	0.093465	0.0367358	0.0402534	TRUE	FALSE	FALSE	FALSE	FALSE	FALSE	FALSE	FALSE	FALSE	FALSE	FALSE	FALSE	FALSE	FALSE	FALSE	FALSE
YMR020W	FALSE	0.0287706	0.0254412	0.0175398	0.0522863	0.00609939	0.0140062	0.0130806	0.00493903	0.0727366	0.0545965	0.0215918	0.00392722	0.0103736	0.00326092	0.00517647	0.035147	FALSE	FALSE	FALSE	FALSE	FALSE	FALSE	FALSE	FALSE	FALSE	FALSE	FALSE	FALSE	FALSE	FALSE	FALSE	FALSE
YDR396W	FALSE	0.0471069	0.00701752	0.0103363	0.0840371	0.0912637	0.107952	0.0822194	0.0919835	0.0540482	0.00714728	0.0712721	0.0874548	0.0866698	0.0626215	0.0649834	0.0130686	FALSE	FALSE	FALSE	FALSE	FALSE	FALSE	FALSE	FALSE	FALSE	FALSE	FALSE	FALSE	FALSE	FALSE	FALSE	FALSE
YLR293C	FALSE	0.0269402	0.00722557	0.037423	0.0849961	0.0428213	0.0581396	0.0478707	0.0280036	0.0340323	0.0456687	0.00326066	0.0532312	0.00985429	0.0441687	0.0399006	0.0107462	FALSE	FALSE	FALSE	FALSE	FALSE	FALSE	FALSE	FALSE	FALSE	FALSE	FALSE	FALSE	FALSE	FALSE	FALSE	FALSE
YBR228W	FALSE	0.0792189	0.0180447	0.0337411	0.0594152	0.0518347	0.0613136	0.0123502	0.0694653	0.00913774	0.0703632	0.0181037	0.00378951	0.0671471	0.0653759	0.0304315	0.0359104	FALSE	FALSE	FALSE	FALSE	FALSE	FALSE	FALSE	FALSE	FALSE	FALSE	FALSE	FALSE	FALSE	FALSE	FALSE	FALSE
YML124C	FALSE	0.0135666	0.0353231	0.108527	0.125165	0.127032	0.127242	0.105466	0.0732864	0.0166312	0.0375237	0.0895692	0.12783	0.147802	0.115225	0.0768172	0.0468161	FALSE	FALSE	FALSE	FALSE	FALSE	FALSE	FALSE	FALSE	FALSE	FALSE	FALSE	FALSE	FALSE	FALSE	FALSE	FALSE
YIL063C	FALSE	0.0323041	0.0465886	0.0312223	0.0190295	0.0407813	0.0445544	0.0912345	0.0220118	0.0238226	0.0390845	0.0495679	0.0513674	0.0719924	0.0095198	0.0044614	0.0561758	FALSE	FALSE	FALSE	FALSE	FALSE	FALSE	FALSE	FALSE	FALSE	FALSE	FALSE	FALSE	FALSE	FALSE	FALSE	FALSE
YBR294W	FALSE	0.0180043	0.0246856	0.0102129	0.0168811	0.0237762	0.00350927	0.0454895	0.0308209	0.0358358	0.0147003	0.0422378	0.0162016	0.0252449	0.0110287	0.0020901	0.0356051	FALSE	FALSE	FALSE	FALSE	FALSE	FALSE	FALSE	FALSE	FALSE	FALSE	FALSE	FALSE	FALSE	FALSE	FALSE	FALSE
YOL142W	FALSE	0.0077635	0.0218936	0.00798151	0.0276785	0.0522073	0.0547804	0.0458938	0.033727	0.0174401	0.0168241	0.0590573	0.054353	0.057578	0.0516275	0.0681587	0.02383	FALSE	FALSE	FALSE	FALSE	FALSE	FALSE	FALSE	FALSE	FALSE	FALSE	FALSE	FALSE	FALSE	FALSE	FALSE	FALSE
YOL032W	FALSE	0.0320138	0.0228355	0.111364	0.132311	0.0687757	0.0646018	0.0308851	0.0597361	0.0143963	0.0555798	0.0117625	0.0638883	0.072658	0.0399479	0.0512009	0.0455211	FALSE	FALSE	FALSE	FALSE	FALSE	FALSE	FALSE	FALSE	FALSE	FALSE	FALSE	FALSE	FALSE	FALSE	FALSE	FALSE
YDR445C	FALSE	0.0182337	0.0216877	0.0595041	0.0982713	0.107398	0.0890601	0.0228954	0.0727288	0.0150933	0.0314132	0.0329318	0.0928476	0.134669	0.0476813	0.0125053	0.0104743	FALSE	FALSE	FALSE	FALSE	FALSE	FALSE	FALSE	FALSE	FALSE	FALSE	FALSE	FALSE	FALSE	FALSE	FALSE	FALSE
YOR294W	FALSE	0.0448985	0.0483574	0.0814333	0.0581082	0.0621143	0.0447253	0.0458156	0.0513129	0.00249487	0.0195811	0.0555852	0.0013015	0.0496159	0.115131	0.0786408	0.0891823	FALSE	FALSE	FALSE	FALSE	FALSE	FALSE	FALSE	FALSE	FALSE	FALSE	FALSE	FALSE	FALSE	FALSE	FALSE	FALSE
YDR233C	FALSE	0.0788669	0.0511106	0.0124968	0.0225399	0.0340316	0.00237609	0.00122724	0.0189689	0.00261008	0.0188418	0.00719303	0.0360078	0.0414797	0.046388	0.0431506	0.0503489	FALSE	FALSE	FALSE	FALSE	FALSE	FALSE	FALSE	FALSE	FALSE	FALSE	FALSE	FALSE	FALSE	FALSE	FALSE	FALSE
YMR294W	FALSE	0.0391993	0.0345917	0.00661157	0.0354744	0.0944204	0.0267095	0.028021	0.100458	0.113264	0.100932	0.0241841	0.0483431	0.0208763	0.0584368	0.0286924	0.0391993	FALSE	FALSE	FALSE	FALSE	FALSE	FALSE	FALSE	FALSE	FALSE	FALSE	FALSE	FALSE	FALSE	FALSE	FALSE	FALSE
YKL187C	FALSE	0.0446822	0.0495288	0.0871122	0.0309852	0.0529469	0.0651077	0.0720702	0.0514497	0.0379734	0.00649353	0.00832616	0.0285343	0.0283323	0.0378793	0.0568388	0.0351419	FALSE	FALSE	FALSE	FALSE	FALSE	FALSE	FALSE	FALSE	FALSE	FALSE	FALSE	FALSE	FALSE	FALSE	FALSE	FALSE
YNL042W	FALSE	0.056101	0.0387427	0.147707	0.0555752	0.0528606	0.0546537	0.0210869	0.0590311	0.0417825	0.108449	0.0460588	0.00342467	0.00478282	0.0289765	0.0131755	0.0326363	FALSE	FALSE	FALSE	FALSE	FALSE	FALSE	FALSE	FALSE	FALSE	FALSE	FALSE	FALSE	FALSE	FALSE	FALSE	FALSE
YOR081C	FALSE	0.0457937	0.092777	0.122416	0.108016	0.0925092	0.0601194	0.00749619	0.0991645	0.160394	0.146071	0.134843	0.0912006	0.0558615	0.0229618	0.0135991	0.027698	FALSE	FALSE	FALSE	FALSE	FALSE	FALSE	FALSE	FALSE	FALSE	FALSE	FALSE	FALSE	FALSE	FALSE	FALSE	FALSE
YLR303W	FALSE	0.226618	0.116405	0.187835	0.300209	0.307143	0.280928	0.19961	0.0895662	0.0856116	0.250568	0.19937	0.278972	0.285412	0.242317	0.213272	0.138561	FALSE	FALSE	FALSE	TRUE	TRUE	TRUE	FALSE	FALSE	FALSE	TRUE	FALSE	TRUE	TRUE	FALSE	FALSE	FALSE
YBR167C	FALSE	0.00680755	0.00412794	0.0281772	0.0203373	0.0926273	0.0155585	0.00213308	0.0249351	0.0123815	0.0419275	0.0418005	0.0184136	0.0120678	0.0272498	0.0142747	0.00918755	FALSE	FALSE	FALSE	FALSE	FALSE	FALSE	FALSE	FALSE	FALSE	FALSE	FALSE	FALSE	FALSE	FALSE	FALSE	FALSE
YMR152W	FALSE	0.0412096	0.00329036	0.0346188	0.0347752	0.0471501	0.0320348	0.024964	0.0641457	0.024335	0.00885184	0.0143097	0.0259041	0.0698397	0.0150571	0.0116611	0.0517325	FALSE	FALSE	FALSE	FALSE	FALSE	FALSE	FALSE	FALSE	FALSE	FALSE	FALSE	FALSE	FALSE	FALSE	FALSE	FALSE
YBR162C	FALSE	0.0262491	0.0667533	0.0765135	0.0897161	0.0401148	0.00754894	0.0393049	0.0789684	0.115721	0.189109	0.116985	0.0465715	0.00245889	0.0296245	0.0831411	0.0721977	FALSE	FALSE	FALSE	FALSE	FALSE	FALSE	FALSE	FALSE	FALSE	FALSE	FALSE	FALSE	FALSE	FALSE	FALSE	FALSE
YPL087W	FALSE	0.0101635	0.0374786	0.121385	0.131064	0.108973	0.0973597	0.0426406	0.0310684	0.0619706	0.0815488	0.0229738	0.0462803	0.0751579	0.066079	0.0716364	0.0929979	FALSE	FALSE	FALSE	FALSE	FALSE	FALSE	FALSE	FALSE	FALSE	FALSE	FALSE	FALSE	FALSE	FALSE	FALSE	FALSE
YGR287C	FALSE	0.133368	0.137959	0.057149	0.0978008	0.0775767	0.0119209	0.0538558	0.0798543	0.146014	0.131744	0.0547172	0.0759515	0.0471863	0.0164233	0.00761317	0.0216111	FALSE	FALSE	FALSE	FALSE	FALSE	FALSE	FALSE	FALSE	FALSE	FALSE	FALSE	FALSE	FALSE	FALSE	FALSE	FALSE
YLR054C	FALSE	0.271248	0.131918	0.155862	0.15964	0.104388	0.0100182	0.133212	0.017483	0.140832	0.149969	0.25266	0.077121	0.0814163	0.0464521	0.105046	0.013146	TRUE	FALSE	FALSE	FALSE	FALSE	FALSE	FALSE	FALSE	FALSE	FALSE	TRUE	FALSE	FALSE	FALSE	FALSE	FALSE
YLR275W	FALSE	0.00138937	0.015672	0.0408731	0.010226	0.0717388	0.0248331	0.0102405	0.00878519	0.0185311	0.0521754	0.0838723	0.00330937	0.00995637	0.0309378	0.0217084	0.0152813	FALSE	FALSE	FALSE	FALSE	FALSE	FALSE	FALSE	FALSE	FALSE	FALSE	FALSE	FALSE	FALSE	FALSE	FALSE	FALSE
YGR229C	FALSE	0.0578609	0.070273	0.116305	0.0483355	0.0408252	0.044904	0.0218205	0.0349086	0.0212827	0.0216023	0.0556521	0.0218441	0.0554798	0.102491	0.106332	0.0731309	FALSE	FALSE	FALSE	FALSE	FALSE	FALSE	FALSE	FALSE	FALSE	FALSE	FALSE	FALSE	FALSE	FALSE	FALSE	FALSE
YOR329C	FALSE	0.00663783	0.0142584	0.0292498	0.0220196	0.00250975	0.0587473	0.0592777	0.0346217	0.0114919	0.00201464	0.00798687	0.0187533	0.0208328	0.00578396	0.0430704	0.0161276	FALSE	FALSE	FALSE	FALSE	FALSE	FALSE	FALSE	FALSE	FALSE	FALSE	FALSE	FALSE	FALSE	FALSE	FALSE	FALSE
YPL063W	FALSE	0.0194962	0.0339538	0.0164746	0.0569549	0.0101337	0.0100869	0.02432	0.0117511	0.0411703	0.0326318	0.0109445	0.0475415	0.0108877	0.00230353	0.0117033	0.0142534	FALSE	FALSE	FALSE	FALSE	FALSE	FALSE	FALSE	FALSE	FALSE	FALSE	FALSE	FALSE	FALSE	FALSE	FALSE	FALSE
YDL012C	FALSE	0.0261312	0.0276236	0.0386077	0.053707	0.025259	0.0474331	0.039798	0.0220579	0.12502	0.0484384	0.0130689	0.0143559	0.0138413	0.00922955	0.0321962	0.044035	FALSE	FALSE	FALSE	FALSE	FALSE	FALSE	FALSE	FALSE	FALSE	FALSE	FALSE	FALSE	FALSE	FALSE	FALSE	FALSE
YJL005W	FALSE	0.141586	0.13843	0.142547	0.0134617	0.0109642	0.0268289	0.0257344	0.0518127	0.0609966	0.0825366	0.0757459	0.0744876	0.0902895	0.0534366	0.0227692	0.0495424	FALSE	FALSE	FALSE	FALSE	FALSE	FALSE	FALSE	FALSE	FALSE	FALSE	FALSE	FALSE	FALSE	FALSE	FALSE	FALSE
YNL294C	FALSE	0.00237679	0.0118921	0.0171335	0.0219913	0.0337184	0.0192973	0.0149557	0.0355541	0.0232171	0.0421315	0.0493598	0.0381759	0.0379506	0.00186747	0.0352864	0.00111369	FALSE	FALSE	FALSE	FALSE	FALSE	FALSE	FALSE	FALSE	FALSE	FALSE	FALSE	FALSE	FALSE	FALSE	FALSE	FALSE
YDL185W	FALSE	0.0101679	0.0181174	0.042226	0.0143246	0.0116885	0.00392253	0.0020033	0.00906694	0.00872349	0.0433386	0.027642	0.0108041	0.0291463	0.0197581	0.0407425	0.0646246	FALSE	FALSE	FALSE	FALSE	FALSE	FALSE	FALSE	FALSE	FALSE	FALSE	FALSE	FALSE	FALSE	FALSE	FALSE	FALSE
YBR171W	FALSE	0.0505594	0.0698258	0.0485613	0.0450675	0.00633822	0.0456115	0.045022	0.0130074	0.00663988	0.00147904	0.0221306	0.0108471	0.0263025	0.0268733	0.00918108	0.0354094	FALSE	FALSE	FALSE	FALSE	FALSE	FALSE	FALSE	FALSE	FALSE	FALSE	FALSE	FALSE	FALSE	FALSE	FALSE	FALSE
YGR172C	FALSE	0.0786043	0.0591254	0.0412643	0.0527092	0.0113221	0.0305214	0.0465778	0.0187914	0.0366709	0.0186691	0.0864953	0.0265504	0.00678701	0.029817	0.0134685	0.0274632	FALSE	FALSE	FALSE	FALSE	FALSE	FALSE	FALSE	FALSE	FALSE	FALSE	FALSE	FALSE	FALSE	FALSE	FALSE	FALSE
YAL026C	FALSE	0.00270504	0.0032057	0.00569558	0.0269879	0.0201036	0.0355759	0.017861	0.0377147	0.0390042	0.0135345	0.0189589	0.0210329	0.0153524	0.00898852	0.00184846	0.00262107	FALSE	FALSE	FALSE	FALSE	FALSE	FALSE	FALSE	FALSE	FALSE	FALSE	FALSE	FALSE	FALSE	FALSE	FALSE	FALSE
YDR433W	FALSE	0.178829	0.154764	0.115767	0.069049	0.016467	0.107191	0.173035	0.141337	0.118061	0.152098	0.00412342	0.0361989	0.0800181	0.0988944	0.0511217	0.0294434	FALSE	FALSE	FALSE	FALSE	FALSE	FALSE	FALSE	FALSE	FALSE	FALSE	FALSE	FALSE	FALSE	FALSE	FALSE	FALSE
YLR026C	FALSE	0.0549561	0.0512262	0.0403701	0.0263088	0.0389475	0.0707028	0.0676229	0.0271461	0.0413146	0.0249533	0.0193663	0.0422547	0.00823394	0.0309302	0.0308129	0.0141112	FALSE	FALSE	FALSE	FALSE	FALSE	FALSE	FALSE	FALSE	FALSE	FALSE	FALSE	FALSE	FALSE	FALSE	FALSE	FALSE
YGR222W	FALSE	0.075301	0.0285667	0.0339896	0.133344	0.120394	0.113696	0.0833545	0.0599675	0.0542949	0.00829236	0.0646739	0.0927395	0.092094	0.0885114	0.0858157	0.0961493	FALSE	FALSE	FALSE	FALSE	FALSE	FALSE	FALSE	FALSE	FALSE	FALSE	FALSE	FALSE	FALSE	FALSE	FALSE	FALSE
YLR350W	FALSE	0.00591591	0.014104	0.0087716	0.00290264	0.0168103	0.0482092	0.062516	0.0654895	0.0760367	0.0120429	0.00817802	0.0290502	0.0430581	0.0764924	0.0514842	0.0118254	FALSE	FALSE	FALSE	FALSE	FALSE	FALSE	FALSE	FALSE	FALSE	FALSE	FALSE	FALSE	FALSE	FALSE	FALSE	FALSE
YJR025C	FALSE	0.320794	0.237994	0.239757	0.153086	0.0246079	0.0900447	0.208787	0.276805	0.277044	0.258755	0.124564	0.0773352	0.0342473	0.0151773	0.0346831	0.0300788	TRUE	FALSE	FALSE	FALSE	FALSE	FALSE	FALSE	TRUE	TRUE	TRUE	FALSE	FALSE	FALSE	FALSE	FALSE	FALSE
YPL105C	FALSE	0.0316971	0.0026304	0.0389188	0.0332717	0.00585756	0.043883	0.0505486	0.0436667	0.0345998	0.0206514	0.0486616	0.00846302	0.0514023	0.01475	0.00513634	0.0370222	FALSE	FALSE	FALSE	FALSE	FALSE	FALSE	FALSE	FALSE	FALSE	FALSE	FALSE	FALSE	FALSE	FALSE	FALSE	FALSE
YMR211W	FALSE	0.0512666	0.0102943	0.0073359	0.065902	0.0628757	0.0719194	0.0180481	0.0721889	0.0622076	0.0457798	0.00394227	0.00579097	0.058782	0.0451691	0.0564505	0.0204415	FALSE	FALSE	FALSE	FALSE	FALSE	FALSE	FALSE	FALSE	FALSE	FALSE	FALSE	FALSE	FALSE	FALSE	FALSE	FALSE
YHR081W	FALSE	0.00607677	0.0069544	0.0104336	0.0557659	0.00215342	0.0150117	0.0167087	0.0568673	0.0117151	0.0158458	0.0482584	0.037652	0.00135745	0.0121529	0.0457598	0.0563877	FALSE	FALSE	FALSE	FALSE	FALSE	FALSE	FALSE	FALSE	FALSE	FALSE	FALSE	FALSE	FALSE	FALSE	FALSE	FALSE
YNL193W	FALSE	0.0127036	0.00850339	0.0783415	0.0893308	0.101282	0.0923245	0.0399847	0.0299382	0.0220161	0.0466615	0.0843473	0.0738295	0.0707662	0.0261123	0.0363273	0.0428784	FALSE	FALSE	FALSE	FALSE	FALSE	FALSE	FALSE	FALSE	FALSE	FALSE	FALSE	FALSE	FALSE	FALSE	FALSE	FALSE
YJL107C	FALSE	0.0635759	0.0010086	0.0679057	0.0533326	0.0751503	0.0523038	0.0564692	0.0647683	0.0106304	0.101184	0.0578977	0.0120181	0.0113133	0.0656548	0.0459882	0.0389168	FALSE	FALSE	FALSE	FALSE	FALSE	FALSE	FALSE	FALSE	FALSE	FALSE	FALSE	FALSE	FALSE	FALSE	FALSE	FALSE
YLL008W	FALSE	0.0253266	0.0249876	0.0223842	0.0191309	0.0136645	0.00324277	0.0174273	0.0039977	0.00402547	0.0161316	0.0204302	0.0212332	0.00883709	0.0364892	0.0178586	0.0521709	FALSE	FALSE	FALSE	FALSE	FALSE	FALSE	FALSE	FALSE	FALSE	FALSE	FALSE	FALSE	FALSE	FALSE	FALSE	FALSE
YHR214W	FALSE	0.00421953	0.117888	0.162564	0.0994255	0.0376035	0.00850289	0.281706	0.181903	0.279648	0.144274	0.120693	0.137289	0.196541	0.130629	0.0683414	0.315075	FALSE	FALSE	FALSE	FALSE	FALSE	FALSE	TRUE	FALSE	TRUE	FALSE	FALSE	FALSE	FALSE	FALSE	FALSE	TRUE
YKL087C	FALSE	0.0350263	0.0341701	0.00391369	0.0103952	0.018909	0.0185997	0.0160136	0.00433344	0.0338819	0.0334924	0.0723884	0.0271737	0.040416	0.0128919	0.0259061	0.0159031	FALSE	FALSE	FALSE	FALSE	FALSE	FALSE	FALSE	FALSE	FALSE	FALSE	FALSE	FALSE	FALSE	FALSE	FALSE	FALSE
YBL031W	FALSE	0.0438466	0.103769	0.131452	0.17103	0.174946	0.137354	0.00989291	0.0941701	0.145571	0.187458	0.226036	0.134645	0.0420145	0.0198271	0.064633	0.0204572	FALSE	FALSE	FALSE	FALSE	FALSE	FALSE	FALSE	FALSE	FALSE	FALSE	FALSE	FALSE	FALSE	FALSE	FALSE	FALSE
YIL150C	FALSE	0.0247504	0.00434777	0.0596499	0.0997032	0.0273654	0.107682	0.0351043	0.0762695	0.0683746	0.0785738	0.0312414	0.0297035	0.0412799	0.097954	0.0388736	0.0818506	FALSE	FALSE	FALSE	FALSE	FALSE	FALSE	FALSE	FALSE	FALSE	FALSE	FALSE	FALSE	FALSE	FALSE	FALSE	FALSE
YIL074C	FALSE	0.0271611	0.0275513	0.0181831	0.0929021	0.0759067	0.0639013	0.0167104	0.0576492	0.0717857	0.0790608	0.0261693	0.0477114	0.0292826	0.00985059	0.0411877	0.00659358	FALSE	FALSE	FALSE	FALSE	FALSE	FALSE	FALSE	FALSE	FALSE	FALSE	FALSE	FALSE	FALSE	FALSE	FALSE	FALSE
YJR053W	TRUE	0.00248064	0.0939999	0.247863	0.251267	0.282349	0.22536	0.109051	0.00602232	0.119104	0.250084	0.217444	0.218847	0.204832	0.166101	0.0498829	0.00428318	FALSE	FALSE	FALSE	TRUE	TRUE	FALSE	FALSE	FALSE	FALSE	TRUE	FALSE	FALSE	FALSE	FALSE	FALSE	FALSE
YOR339C	FALSE	0.150042	0.0646707	0.0298877	0.01825	0.00486959	0.0942894	0.0758359	0.0104721	0.0288411	0.020275	0.0278322	0.0893936	0.0404224	0.0209009	0.0373525	0.0237048	FALSE	FALSE	FALSE	FALSE	FALSE	FALSE	FALSE	FALSE	FALSE	FALSE	FALSE	FALSE	FALSE	FALSE	FALSE	FALSE
YKL203C	FALSE	0.0592457	0.10977	0.098627	0.0221286	0.0172377	0.0110398	0.0456671	0.0620216	0.0685403	0.0867764	0.061496	0.056263	0.0110185	0.0155688	0.0254392	0.00135756	FALSE	FALSE	FALSE	FALSE	FALSE	FALSE	FALSE	FALSE	FALSE	FALSE	FALSE	FALSE	FALSE	FALSE	FALSE	FALSE
YJR044C	FALSE	0.0691456	0.00369264	0.123776	0.054801	0.0432343	0.0653841	0.0317852	0.0173775	0.0193206	0.039348	0.0332936	0.0659593	0.0366403	0.0073701	0.0544413	0.037217	FALSE	FALSE	FALSE	FALSE	FALSE	FALSE	FALSE	FALSE	FALSE	FALSE	FALSE	FALSE	FALSE	FALSE	FALSE	FALSE
YMR290W-A	FALSE	0.0652585	0.0815329	0.0933033	0.200798	0.0759055	0.114929	0.100359	0.0303691	0.17151	0.0808278	0.0334945	0.099631	0.105292	0.0867959	0.0442058	0.112875	FALSE	FALSE	FALSE	FALSE	FALSE	FALSE	FALSE	FALSE	FALSE	FALSE	FALSE	FALSE	FALSE	FALSE	FALSE	FALSE
YPL125W	FALSE	0.0275657	0.00784152	0.0109146	0.00731011	0.0123281	0.0197088	0.00619314	0.00492611	0.0165066	0.00773243	0.00599792	0.0125371	0.011242	0.00816262	0.0457836	0.011364	FALSE	FALSE	FALSE	FALSE	FALSE	FALSE	FALSE	FALSE	FALSE	FALSE	FALSE	FALSE	FALSE	FALSE	FALSE	FALSE
YBR126W-A	FALSE	0.0591121	0.0293887	0.00718435	0.0565261	0.106743	0.0708412	0.034621	0.0801317	0.107503	0.046642	0.127344	0.0651186	0.0839194	0.00422024	0.0907411	0.120578	FALSE	FALSE	FALSE	FALSE	FALSE	FALSE	FALSE	FALSE	FALSE	FALSE	FALSE	FALSE	FALSE	FALSE	FALSE	FALSE
YNL254C	FALSE	0.0202755	0.00714337	0.0604331	0.123567	0.0998843	0.112287	0.0670198	0.0284604	0.0247001	0.0432385	0.0333737	0.0851557	0.0915363	0.0334538	0.076327	0.0907333	FALSE	FALSE	FALSE	FALSE	FALSE	FALSE	FALSE	FALSE	FALSE	FALSE	FALSE	FALSE	FALSE	FALSE	FALSE	FALSE
YCL035C	FALSE	0.15894	0.0884232	0.0339204	0.0266121	0.040256	0.0622157	0.0486534	0.0437523	0.0700393	0.0266947	0.0645007	0.0134153	0.0196757	0.0314178	0.00302955	0.0318141	FALSE	FALSE	FALSE	FALSE	FALSE	FALSE	FALSE	FALSE	FALSE	FALSE	FALSE	FALSE	FALSE	FALSE	FALSE	FALSE
YDR179C	FALSE	0.0270457	0.0593501	0.269719	0.237878	0.17207	0.130334	0.15628	0.0783803	0.110338	0.118127	0.174022	0.236307	0.235235	0.0598451	0.0518124	0.0527751	FALSE	FALSE	TRUE	FALSE	FALSE	FALSE	FALSE	FALSE	FALSE	FALSE	FALSE	FALSE	FALSE	FALSE	FALSE	FALSE
YLR245C	FALSE	0.0467808	0.00523692	0.0477398	0.14544	0.104147	0.0541424	0.108199	0.013731	0.0656071	0.0710598	0.197522	0.118175	0.0740941	0.042097	0.00622138	0.040496	FALSE	FALSE	FALSE	FALSE	FALSE	FALSE	FALSE	FALSE	FALSE	FALSE	FALSE	FALSE	FALSE	FALSE	FALSE	FALSE
YEL051W	FALSE	0.0474353	0.058536	0.0687875	0.0652592	0.0700813	0.062393	0.0294526	0.0426798	0.00260289	0.0275467	0.0678665	0.0560978	0.0578364	0.0522784	0.0581854	0.0475222	FALSE	FALSE	FALSE	FALSE	FALSE	FALSE	FALSE	FALSE	FALSE	FALSE	FALSE	FALSE	FALSE	FALSE	FALSE	FALSE
YLR036C	FALSE	0.073421	0.0361577	0.0335645	0.0507687	0.040686	0.00942274	0.0858098	0.0707581	0.00641162	0.0439709	0.0426765	0.011081	0.015563	0.0338388	0.014568	0.00316307	FALSE	FALSE	FALSE	FALSE	FALSE	FALSE	FALSE	FALSE	FALSE	FALSE	FALSE	FALSE	FALSE	FALSE	FALSE	FALSE
YDR180W	TRUE	0.196373	0.0850724	0.0231589	0.0077515	0.0486313	0.0731321	0.116124	0.204457	0.14375	0.123076	0.00286026	0.0603546	0.0719616	0.0457074	0.0187575	0.0380081	FALSE	FALSE	FALSE	FALSE	FALSE	FALSE	FALSE	FALSE	FALSE	FALSE	FALSE	FALSE	FALSE	FALSE	FALSE	FALSE
YGR214W	FALSE	0.0265117	0.00383367	0.00809562	0.0126768	0.0340341	0.0223036	0.00469355	0.0134713	0.0101848	0.032258	0.0116937	0.00453875	0.0120699	0.024885	0.025133	0.0409971	FALSE	FALSE	FALSE	FALSE	FALSE	FALSE	FALSE	FALSE	FALSE	FALSE	FALSE	FALSE	FALSE	FALSE	FALSE	FALSE
YOR205C	FALSE	0.015412	0.0183536	0.060857	0.00615548	0.024971	0.0597252	0.0745171	0.0201293	0.0177871	0.0365784	0.00507771	0.0597805	0.0907333	0.0200282	0.0345505	0.0849676	FALSE	FALSE	FALSE	FALSE	FALSE	FALSE	FALSE	FALSE	FALSE	FALSE	FALSE	FALSE	FALSE	FALSE	FALSE	FALSE
YIL095W	FALSE	0.00195285	0.0209212	0.00718318	0.031935	0.0209748	0.022467	0.0567165	0.0266655	0.0457361	0.0453524	0.0223791	0.014063	0.0305542	0.0121118	0.0299464	0.0388393	FALSE	FALSE	FALSE	FALSE	FALSE	FALSE	FALSE	FALSE	FALSE	FALSE	FALSE	FALSE	FALSE	FALSE	FALSE	FALSE
YGR044C	FALSE	0.316157	0.320018	0.388237	0.447133	0.445803	0.504242	0.557066	0.554189	0.379453	0.412687	0.529108	0.644673	0.633562	0.536747	0.466933	0.443645	TRUE	TRUE	TRUE	TRUE	TRUE	TRUE	TRUE	TRUE	TRUE	TRUE	TRUE	TRUE	TRUE	TRUE	TRUE	TRUE
YCR089W	FALSE	0.0731157	0.0569856	0.0488969	0.0826477	0.0371904	0.0255232	0.0122364	0.00522911	0.034482	0.0661546	0.0500235	0.0616848	0.0456153	0.0467435	0.021939	0.0144151	FALSE	FALSE	FALSE	FALSE	FALSE	FALSE	FALSE	FALSE	FALSE	FALSE	FALSE	FALSE	FALSE	FALSE	FALSE	FALSE
YOL144W	FALSE	0.00495773	0.00281644	0.0123524	0.0230038	0.0221046	0.023531	0.0106979	0.0354758	0.0795294	0.0501098	0.0343806	0.0142847	0.00762327	0.0144606	0.0133239	0.0958113	FALSE	FALSE	FALSE	FALSE	FALSE	FALSE	FALSE	FALSE	FALSE	FALSE	FALSE	FALSE	FALSE	FALSE	FALSE	FALSE
YMR048W	FALSE	0.244627	0.19906	0.199605	0.0842856	0.00278155	0.136842	0.195607	0.228092	0.275622	0.23196	0.109607	0.0219135	0.0245735	0.0362444	0.0492541	0.0511353	FALSE	FALSE	FALSE	FALSE	FALSE	FALSE	FALSE	FALSE	TRUE	FALSE	FALSE	FALSE	FALSE	FALSE	FALSE	FALSE
YBR286W	FALSE	0.0413093	0.031807	0.0274796	0.017996	0.0195432	0.0129748	0.0279688	0.0343797	0.0347598	0.0314231	0.0620663	0.0267207	0.0036594	0.00250629	0.0243562	0.0327543	FALSE	FALSE	FALSE	FALSE	FALSE	FALSE	FALSE	FALSE	FALSE	FALSE	FALSE	FALSE	FALSE	FALSE	FALSE	FALSE
YDR098C	FALSE	0.0525282	0.023801	0.0261242	0.00228141	0.00370762	0.0196014	0.0319754	0.0718383	0.0878863	0.0185379	0.054684	0.00875083	0.0329708	0.0149797	0.0140432	0.050496	FALSE	FALSE	FALSE	FALSE	FALSE	FALSE	FALSE	FALSE	FALSE	FALSE	FALSE	FALSE	FALSE	FALSE	FALSE	FALSE
YLR352W	FALSE	0.00813737	0.035108	0.0797616	0.0275549	0.0370011	0.0459228	0.0351476	0.0229132	0.0427308	0.0374237	0.0159776	0.0410389	0.00319633	0.0662412	0.018396	0.0317178	FALSE	FALSE	FALSE	FALSE	FALSE	FALSE	FALSE	FALSE	FALSE	FALSE	FALSE	FALSE	FALSE	FALSE	FALSE	FALSE
YPL129W	FALSE	0.014623	0.0163531	0.0328816	0.00347111	0.0111088	0.00407773	0.0110545	0.003408	0.0288949	0.0100302	0.0534245	0.0101219	0.00282252	0.0161977	0.00343908	0.0070432	FALSE	FALSE	FALSE	FALSE	FALSE	FALSE	FALSE	FALSE	FALSE	FALSE	FALSE	FALSE	FALSE	FALSE	FALSE	FALSE
YIL002C	FALSE	0.0494407	0.060347	0.0812955	0.00341655	0.0293821	0.0530243	0.0382776	0.0587371	0.0788401	0.0492785	0.0217597	0.00785144	0.0231259	0.00396411	0.0407541	0.0106378	FALSE	FALSE	FALSE	FALSE	FALSE	FALSE	FALSE	FALSE	FALSE	FALSE	FALSE	FALSE	FALSE	FALSE	FALSE	FALSE
YIL165C	FALSE	0.0807487	0.0201144	0.0872082	0.0486464	0.104266	0.0669348	0.0405987	0.0324601	0.0173294	0.03645	0.111872	0.00389071	0.0291481	0.0181272	0.00472855	0.0158181	FALSE	FALSE	FALSE	FALSE	FALSE	FALSE	FALSE	FALSE	FALSE	FALSE	FALSE	FALSE	FALSE	FALSE	FALSE	FALSE
YNL326C	FALSE	0.12595	0.0749084	0.0820668	0.0276515	0.0018708	0.0663931	0.0493745	0.0458956	0.0176503	0.0689565	0.027426	0.0497672	0.0588512	0.00849555	0.00431126	0.0158481	FALSE	FALSE	FALSE	FALSE	FALSE	FALSE	FALSE	FALSE	FALSE	FALSE	FALSE	FALSE	FALSE	FALSE	FALSE	FALSE
YBR287W	FALSE	0.0671253	0.0944919	0.143757	0.134508	0.102129	0.0793572	0.043193	0.0563377	0.100433	0.102174	0.0912307	0.0863828	0.0698541	0.0592277	0.0803895	0.0628233	FALSE	FALSE	FALSE	FALSE	FALSE	FALSE	FALSE	FALSE	FALSE	FALSE	FALSE	FALSE	FALSE	FALSE	FALSE	FALSE
YGL072C	FALSE	0.0137138	0.0572814	0.161401	0.0495442	0.0593597	0.0376519	0.0103696	0.0330901	0.0431806	0.0830394	0.0295368	0.00740459	0.0588123	0.0477584	0.0142226	0.0474186	FALSE	FALSE	FALSE	FALSE	FALSE	FALSE	FALSE	FALSE	FALSE	FALSE	FALSE	FALSE	FALSE	FALSE	FALSE	FALSE
YML046W	FALSE	0.0570187	0.025815	0.0257057	0.029031	0.0421735	0.0292958	0.0122273	0.0072877	0.0370659	0.00530715	0.0304831	0.00854064	0.00307792	0.0249433	0.00548788	0.0112879	FALSE	FALSE	FALSE	FALSE	FALSE	FALSE	FALSE	FALSE	FALSE	FALSE	FALSE	FALSE	FALSE	FALSE	FALSE	FALSE
YBR190W	FALSE	0.137032	0.0130794	0.100032	0.251641	0.0246001	0.086221	0.0855937	0.178831	0.283683	0.0966426	0.126523	0.0246182	0.00848899	0.107683	0.0790585	0.10584	FALSE	FALSE	FALSE	TRUE	FALSE	FALSE	FALSE	FALSE	TRUE	FALSE	FALSE	FALSE	FALSE	FALSE	FALSE	FALSE
YNL256W	FALSE	0.0666049	0.0765499	0.0669982	0.047275	0.0460705	0.0350719	0.0110524	0.0430269	0.052336	0.119515	0.0161749	0.0540612	0.0438217	0.0165317	0.0318404	0.0330708	FALSE	FALSE	FALSE	FALSE	FALSE	FALSE	FALSE	FALSE	FALSE	FALSE	FALSE	FALSE	FALSE	FALSE	FALSE	FALSE
YIL094C	FALSE	0.0110593	0.00399493	0.00220186	0.00262421	0.0168709	0.0332311	0.0470796	0.0405115	0.0324808	0.00466492	0.0540847	0.0094804	0.0290528	0.0399397	0.0494468	0.0498103	FALSE	FALSE	FALSE	FALSE	FALSE	FALSE	FALSE	FALSE	FALSE	FALSE	FALSE	FALSE	FALSE	FALSE	FALSE	FALSE
YDR378C	FALSE	0.024397	0.0353739	0.00935574	0.0679667	0.100154	0.0694755	0.0357529	0.0600176	0.104135	0.0214178	0.100878	0.0253961	0.0244827	0.0503924	0.0485823	0.0334216	FALSE	FALSE	FALSE	FALSE	FALSE	FALSE	FALSE	FALSE	FALSE	FALSE	FALSE	FALSE	FALSE	FALSE	FALSE	FALSE
YOL125W	FALSE	0.00954468	0.00198825	0.0277273	0.0160393	0.0676526	0.0580246	0.0487908	0.056088	0.0419375	0.0243353	0.0342098	0.0234949	0.0649792	0.0532362	0.0869646	0.0772256	FALSE	FALSE	FALSE	FALSE	FALSE	FALSE	FALSE	FALSE	FALSE	FALSE	FALSE	FALSE	FALSE	FALSE	FALSE	FALSE
YGR256W	FALSE	0.145351	0.0703911	0.084859	0.105433	0.0148412	0.0281357	0.00836117	0.140158	0.198077	0.143861	0.0281582	0.11843	0.0400571	0.0288484	0.0476701	0.0770867	FALSE	FALSE	FALSE	FALSE	FALSE	FALSE	FALSE	FALSE	FALSE	FALSE	FALSE	FALSE	FALSE	FALSE	FALSE	FALSE
YOR189W	FALSE	0.0986606	0.0458712	0.0786986	0.0597223	0.0820985	0.101942	0.0478756	0.0478918	0.0940937	0.0508833	0.143686	0.0772767	0.037725	0.0513312	0.112164	0.0782018	FALSE	FALSE	FALSE	FALSE	FALSE	FALSE	FALSE	FALSE	FALSE	FALSE	FALSE	FALSE	FALSE	FALSE	FALSE	FALSE
YCL049C	FALSE	0.0852714	0.0654574	0.0012429	0.056413	0.0756405	0.0397071	0.0347888	0.0111249	0.0388106	0.0177533	0.0199176	0.00997281	0.0223771	0.070328	0.0226868	0.0306517	FALSE	FALSE	FALSE	FALSE	FALSE	FALSE	FALSE	FALSE	FALSE	FALSE	FALSE	FALSE	FALSE	FALSE	FALSE	FALSE
YJR150C	FALSE	0.00260431	0.00526249	0.0396335	0.0155663	0.00707325	0.021887	0.0237872	0.0513783	0.07747	0.0297164	0.010856	0.0522504	0.0192647	0.0402118	0.0813392	0.0271991	FALSE	FALSE	FALSE	FALSE	FALSE	FALSE	FALSE	FALSE	FALSE	FALSE	FALSE	FALSE	FALSE	FALSE	FALSE	FALSE
YHR040W	FALSE	0.0279269	0.0396387	0.0425059	0.0410646	0.0360639	0.0516193	0.0131588	0.0483165	0.0313399	0.00910812	0.0662868	0.0328471	0.0121602	0.0610113	0.0160882	0.0352369	FALSE	FALSE	FALSE	FALSE	FALSE	FALSE	FALSE	FALSE	FALSE	FALSE	FALSE	FALSE	FALSE	FALSE	FALSE	FALSE
YML112W	FALSE	0.00392699	0.0222271	0.0662618	0.00733595	0.00291736	0.0145919	0.0342818	0.0206359	0.0152216	0.00680658	0.061097	0.0464291	0.0229251	0.0311573	0.0187001	0.067394	FALSE	FALSE	FALSE	FALSE	FALSE	FALSE	FALSE	FALSE	FALSE	FALSE	FALSE	FALSE	FALSE	FALSE	FALSE	FALSE
YBR129C	FALSE	0.0211968	0.0188568	0.0222303	0.0136081	0.00572217	0.0301986	0.00929506	0.0154206	0.0192969	0.047445	0.0541275	0.015743	0.00172812	0.00247879	0.00881892	0.00143915	FALSE	FALSE	FALSE	FALSE	FALSE	FALSE	FALSE	FALSE	FALSE	FALSE	FALSE	FALSE	FALSE	FALSE	FALSE	FALSE
YHL023C	FALSE	0.00447328	0.013164	0.00151704	0.00424172	0.0391131	0.0654455	0.0529043	0.0299974	0.0243277	0.0263784	0.0390343	0.00620468	0.0143194	0.0219249	0.0106236	0.0627147	FALSE	FALSE	FALSE	FALSE	FALSE	FALSE	FALSE	FALSE	FALSE	FALSE	FALSE	FALSE	FALSE	FALSE	FALSE	FALSE
YER096W	FALSE	0.382684	0.319655	0.318975	0.321598	0.0800272	0.066514	0.113484	0.321248	0.400154	0.589782	0.236812	0.135609	0.0225667	0.0769467	0.0297929	0.0102998	TRUE	TRUE	TRUE	TRUE	FALSE	FALSE	FALSE	TRUE	TRUE	TRUE	FALSE	FALSE	FALSE	FALSE	FALSE	FALSE
YML027W	TRUE	0.47681	0.29392	0.268538	0.196919	0.0864455	0.0975742	0.270723	0.536763	0.606609	0.612517	0.222495	0.0242318	0.131761	0.0939915	0.0855304	0.139018	TRUE	TRUE	TRUE	FALSE	FALSE	FALSE	TRUE	TRUE	TRUE	TRUE	FALSE	FALSE	FALSE	FALSE	FALSE	FALSE
YPL166W	FALSE	0.0106903	0.0854579	0.19018	0.0780838	0.182472	0.0822258	0.0298303	0.0816229	0.138846	0.182211	0.124914	0.123824	0.129605	0.104295	0.00251181	0.033302	FALSE	FALSE	FALSE	FALSE	FALSE	FALSE	FALSE	FALSE	FALSE	FALSE	FALSE	FALSE	FALSE	FALSE	FALSE	FALSE
YNL237W	FALSE	0.0148329	0.0197396	0.0151614	0.011456	0.00532355	0.0130958	0.0314896	0.0316293	0.076031	0.0191615	0.0453878	0.0333075	0.0195479	0.0651254	0.062641	0.00442841	FALSE	FALSE	FALSE	FALSE	FALSE	FALSE	FALSE	FALSE	FALSE	FALSE	FALSE	FALSE	FALSE	FALSE	FALSE	FALSE
YBL067C	FALSE	0.0208305	0.0406911	0.0909728	0.0749329	0.018886	0.0291122	0.0414145	0.0568803	0.0730301	0.0735174	0.0587485	0.00984113	0.0202976	0.00292848	0.00676503	0.0404416	FALSE	FALSE	FALSE	FALSE	FALSE	FALSE	FALSE	FALSE	FALSE	FALSE	FALSE	FALSE	FALSE	FALSE	FALSE	FALSE
YDR381C-A	FALSE	0.00822807	0.0368242	0.130304	0.0561358	0.00678352	0.0383449	0.0227024	0.0509868	0.00579684	0.10394	0.0809219	0.065995	0.0658582	0.0550937	0.00343619	0.0219246	FALSE	FALSE	FALSE	FALSE	FALSE	FALSE	FALSE	FALSE	FALSE	FALSE	FALSE	FALSE	FALSE	FALSE	FALSE	FALSE
YDR517W	FALSE	0.0259177	0.0179674	0.0198855	0.0746379	0.115648	0.101194	0.0683159	0.115073	0.0541475	0.0261535	0.0457302	0.0828192	0.103454	0.0826861	0.0917817	0.0911232	FALSE	FALSE	FALSE	FALSE	FALSE	FALSE	FALSE	FALSE	FALSE	FALSE	FALSE	FALSE	FALSE	FALSE	FALSE	FALSE
YJL056C	FALSE	0.0609972	0.0323079	0.00510338	0.0219025	0.0180078	0.0382333	0.0089675	0.0298183	0.025826	0.0506131	0.0386128	0.00659524	0.0542225	0.0208322	0.0458569	0.0185877	FALSE	FALSE	FALSE	FALSE	FALSE	FALSE	FALSE	FALSE	FALSE	FALSE	FALSE	FALSE	FALSE	FALSE	FALSE	FALSE
YLR262C	FALSE	0.0998277	0.0594444	0.0502281	0.0557094	0.0124596	0.0194048	0.0402071	0.0549408	0.0962492	0.0428904	0.0155396	0.0294428	0.0222702	0.0256901	0.0134196	0.00818194	FALSE	FALSE	FALSE	FALSE	FALSE	FALSE	FALSE	FALSE	FALSE	FALSE	FALSE	FALSE	FALSE	FALSE	FALSE	FALSE
YMR235C	FALSE	0.019638	0.0176588	0.00125666	0.0461625	0.00561989	0.0219698	0.0438424	0.0531963	0.0587402	0.0131437	0.0244817	0.0177854	0.00294256	0.0194641	0.036346	0.00449632	FALSE	FALSE	FALSE	FALSE	FALSE	FALSE	FALSE	FALSE	FALSE	FALSE	FALSE	FALSE	FALSE	FALSE	FALSE	FALSE
YEL061C	FALSE	0.0857932	0.127919	0.210383	0.281732	0.231064	0.204629	0.131467	0.0197992	0.129649	0.327569	0.310317	0.246748	0.161177	0.119248	0.0353999	0.00869641	FALSE	FALSE	FALSE	TRUE	FALSE	FALSE	FALSE	FALSE	FALSE	TRUE	TRUE	FALSE	FALSE	FALSE	FALSE	FALSE
YJL098W	FALSE	0.0722555	0.077207	0.105988	0.100849	0.102111	0.0987955	0.039253	0.0417996	0.0459672	0.097518	0.0681458	0.0725893	0.0810102	0.0745869	0.0842635	0.0592292	FALSE	FALSE	FALSE	FALSE	FALSE	FALSE	FALSE	FALSE	FALSE	FALSE	FALSE	FALSE	FALSE	FALSE	FALSE	FALSE
YMR099C	FALSE	0.0272222	0.0139363	0.013516	0.0266166	0.0414414	0.0568947	0.0254073	0.0504652	0.0331083	0.0407981	0.0208667	0.00819727	0.0327135	0.0434598	0.0163788	0.0646795	FALSE	FALSE	FALSE	FALSE	FALSE	FALSE	FALSE	FALSE	FALSE	FALSE	FALSE	FALSE	FALSE	FALSE	FALSE	FALSE
YPR010C-A	FALSE	0.0930107	0.0175075	0.0849899	0.0676697	0.108823	0.0995128	0.028865	0.00499386	0.0279663	0.167052	0.0313292	0.0321331	0.0685153	0.0126031	0.0294927	0.0482706	FALSE	FALSE	FALSE	FALSE	FALSE	FALSE	FALSE	FALSE	FALSE	FALSE	FALSE	FALSE	FALSE	FALSE	FALSE	FALSE
YOR234C	FALSE	0.0224635	0.0256784	0.0253022	0.0296492	0.117643	0.0766974	0.0720988	0.0586464	0.0740575	0.0438834	0.0933214	0.0220939	0.0604181	0.0661142	0.0571103	0.027691	FALSE	FALSE	FALSE	FALSE	FALSE	FALSE	FALSE	FALSE	FALSE	FALSE	FALSE	FALSE	FALSE	FALSE	FALSE	FALSE
YNR047W	FALSE	0.0695131	0.0450122	0.0102034	0.0439429	0.00649626	0.0227433	0.0111532	0.0282194	0.0293343	0.0710199	0.0122536	0.0102564	0.0650864	0.00823262	0.00195417	0.00841097	FALSE	FALSE	FALSE	FALSE	FALSE	FALSE	FALSE	FALSE	FALSE	FALSE	FALSE	FALSE	FALSE	FALSE	FALSE	FALSE
YNR040W	FALSE	0.0332291	0.0108535	0.0143257	0.0534342	0.0382558	0.100015	0.0202261	0.0492882	0.0417586	0.023606	0.0561124	0.0527845	0.041789	0.00414335	0.0553906	0.0129946	FALSE	FALSE	FALSE	FALSE	FALSE	FALSE	FALSE	FALSE	FALSE	FALSE	FALSE	FALSE	FALSE	FALSE	FALSE	FALSE
YGR271W	FALSE	0.0529722	0.0343485	0.0556878	0.0279805	0.0565016	0.0761518	0.0652619	0.0197187	0.0542376	0.0458348	0.0358049	0.0590956	0.056694	0.0583885	0.0267833	0.0294327	FALSE	FALSE	FALSE	FALSE	FALSE	FALSE	FALSE	FALSE	FALSE	FALSE	FALSE	FALSE	FALSE	FALSE	FALSE	FALSE
YKR086W	FALSE	0.0355592	0.0303767	0.0517793	0.057959	0.00127055	0.0438826	0.0311157	0.0274332	0.058827	0.0199493	0.0412653	0.00441745	0.00859837	0.00303923	0.0096936	0.0100022	FALSE	FALSE	FALSE	FALSE	FALSE	FALSE	FALSE	FALSE	FALSE	FALSE	FALSE	FALSE	FALSE	FALSE	FALSE	FALSE
YCR053W	FALSE	0.0799598	0.0591718	0.0427445	0.0500037	0.0215476	0.0225363	0.00588152	0.042032	0.0274729	0.0467797	0.0753906	0.0454469	0.033221	0.037013	0.0166432	0.00207429	FALSE	FALSE	FALSE	FALSE	FALSE	FALSE	FALSE	FALSE	FALSE	FALSE	FALSE	FALSE	FALSE	FALSE	FALSE	FALSE
YGR109W-A	FALSE	0.0942686	0.0574509	0.106121	0.100537	0.03444	0.0302217	0.0911506	0.0653534	0.0279671	0.00324624	0.0682281	0.0252798	0.0548369	0.00628842	0.0980445	0.042266	FALSE	FALSE	FALSE	FALSE	FALSE	FALSE	FALSE	FALSE	FALSE	FALSE	FALSE	FALSE	FALSE	FALSE	FALSE	FALSE
YIL059C	FALSE	0.0329318	0.0351906	0.00603599	0.0247079	0.0366233	0.0280735	0.0578617	0.138673	0.00387197	0.0257649	0.0193784	0.0278746	0.0481459	0.0212969	0.00913022	0.0431024	FALSE	FALSE	FALSE	FALSE	FALSE	FALSE	FALSE	FALSE	FALSE	FALSE	FALSE	FALSE	FALSE	FALSE	FALSE	FALSE
YPL248C	FALSE	0.0543106	0.0420482	0.0964131	0.050979	0.0213553	0.0447209	0.0146014	0.0493087	0.0132033	0.043825	0.0386681	0.0475154	0.0113638	0.0230153	0.0614875	0.0309247	FALSE	FALSE	FALSE	FALSE	FALSE	FALSE	FALSE	FALSE	FALSE	FALSE	FALSE	FALSE	FALSE	FALSE	FALSE	FALSE
YNL094W	FALSE	0.0583514	0.0164064	0.0253559	0.00931627	0.002835	0.0221739	0.00835656	0.00277103	0.0145848	0.0206877	0.0115828	0.0521575	0.0347753	0.00277114	0.0108204	0.00442134	FALSE	FALSE	FALSE	FALSE	FALSE	FALSE	FALSE	FALSE	FALSE	FALSE	FALSE	FALSE	FALSE	FALSE	FALSE	FALSE
YDR197W	FALSE	0.0259831	0.0124027	0.0224065	0.0182989	0.045456	0.0303935	0.0309752	0.0351317	0.0430778	0.0302291	0.0970062	0.00566438	0.0280739	0.0384823	0.0572293	0.0110004	FALSE	FALSE	FALSE	FALSE	FALSE	FALSE	FALSE	FALSE	FALSE	FALSE	FALSE	FALSE	FALSE	FALSE	FALSE	FALSE
YHR112C	FALSE	0.10264	0.0809868	0.0653102	0.0220174	0.0356951	0.0548539	0.0953846	0.057997	0.0942665	0.0515214	0.0464644	0.0119511	0.0133033	0.0237676	0.0184815	0.0291133	FALSE	FALSE	FALSE	FALSE	FALSE	FALSE	FALSE	FALSE	FALSE	FALSE	FALSE	FALSE	FALSE	FALSE	FALSE	FALSE
YBL002W	FALSE	0.00575615	0.249235	0.475651	0.527032	0.362697	0.213817	0.0568091	0.112061	0.319678	0.49925	0.49245	0.480428	0.306578	0.104852	0.0630842	0.198358	FALSE	FALSE	TRUE	TRUE	TRUE	FALSE	FALSE	FALSE	TRUE	TRUE	TRUE	TRUE	TRUE	FALSE	FALSE	FALSE
YMR182C	FALSE	0.0629469	0.00616708	0.0145564	0.0637052	0.0588445	0.0757791	0.0606691	0.00406396	0.0575185	0.00438827	0.0323935	0.0496624	0.0353643	0.0406208	0.0011096	0.0603909	FALSE	FALSE	FALSE	FALSE	FALSE	FALSE	FALSE	FALSE	FALSE	FALSE	FALSE	FALSE	FALSE	FALSE	FALSE	FALSE
YLR042C	FALSE	0.161431	0.0298632	0.0769167	0.00979001	0.00150626	0.0144426	0.0695291	0.188624	0.308679	0.426023	0.243178	0.0232194	0.155425	0.292345	0.372305	0.438408	FALSE	FALSE	FALSE	FALSE	FALSE	FALSE	FALSE	FALSE	TRUE	TRUE	FALSE	FALSE	FALSE	TRUE	TRUE	TRUE
YOL156W	FALSE	0.0122689	0.00763278	0.0132626	0.125049	0.0363356	0.0292971	0.0841914	0.00445732	0.189531	0.0947408	0.00440338	0.045854	0.0348979	0.00672219	0.0214334	0.0493243	FALSE	FALSE	FALSE	FALSE	FALSE	FALSE	FALSE	FALSE	FALSE	FALSE	FALSE	FALSE	FALSE	FALSE	FALSE	FALSE
YPL050C	FALSE	0.0664622	0.0616709	0.0816266	0.0205707	0.0253028	0.00286013	0.00331499	0.0329498	0.03937	0.0619632	0.0112403	0.0423756	0.0497662	0.0128702	0.00266285	0.0468057	FALSE	FALSE	FALSE	FALSE	FALSE	FALSE	FALSE	FALSE	FALSE	FALSE	FALSE	FALSE	FALSE	FALSE	FALSE	FALSE
YDR058C	FALSE	0.0219546	0.106122	0.0764904	0.0228259	0.0371508	0.0366427	0.0265997	0.0518369	0.0305994	0.0403342	0.0838372	0.0688618	0.0182834	0.0499185	0.0263136	0.0436749	FALSE	FALSE	FALSE	FALSE	FALSE	FALSE	FALSE	FALSE	FALSE	FALSE	FALSE	FALSE	FALSE	FALSE	FALSE	FALSE
YDR425W	FALSE	0.067965	0.0354871	0.0816969	0.086012	0.0177637	0.0113627	0.0495032	0.0501704	0.0662019	0.0658553	0.0267402	0.024564	0.0312985	0.0585082	0.00352767	0.00847093	FALSE	FALSE	FALSE	FALSE	FALSE	FALSE	FALSE	FALSE	FALSE	FALSE	FALSE	FALSE	FALSE	FALSE	FALSE	FALSE
YBR050C	FALSE	0.063055	0.133915	0.0964185	0.0374199	0.0975133	0.0334633	0.0410885	0.0552545	0.14858	0.120081	0.15837	0.00592618	0.0490629	0.00381783	0.0449609	0.053839	FALSE	FALSE	FALSE	FALSE	FALSE	FALSE	FALSE	FALSE	FALSE	FALSE	FALSE	FALSE	FALSE	FALSE	FALSE	FALSE
YLR265C	FALSE	0.0577346	0.0095809	0.057062	0.0269503	0.0182105	0.00536067	0.0167543	0.0271773	0.00846566	0.0579884	0.0799146	0.0915117	0.0461643	0.0544349	0.0182409	0.0222837	FALSE	FALSE	FALSE	FALSE	FALSE	FALSE	FALSE	FALSE	FALSE	FALSE	FALSE	FALSE	FALSE	FALSE	FALSE	FALSE
YIL099W	FALSE	0.0288987	0.0178727	0.0176151	0.0389134	0.0271527	0.00764042	0.080759	0.0223759	0.0261794	0.100788	0.0269939	0.0591341	0.0153409	0.0156599	0.0838058	0.0314985	FALSE	FALSE	FALSE	FALSE	FALSE	FALSE	FALSE	FALSE	FALSE	FALSE	FALSE	FALSE	FALSE	FALSE	FALSE	FALSE
YJL081C	FALSE	0.00879149	0.0146275	0.0464167	0.0245316	0.0105805	0.0277973	0.0325307	0.0131249	0.00644448	0.00223109	0.0325036	0.0198138	0.0284075	0.0019086	0.0393311	0.00916594	FALSE	FALSE	FALSE	FALSE	FALSE	FALSE	FALSE	FALSE	FALSE	FALSE	FALSE	FALSE	FALSE	FALSE	FALSE	FALSE
YOR381W	FALSE	0.0010853	0.00415328	0.0117589	0.0188553	0.0112858	0.056365	0.0207491	0.0239058	0.0195084	0.00650454	0.0205038	0.00769065	0.0072096	0.0420873	0.00607211	0.0476775	FALSE	FALSE	FALSE	FALSE	FALSE	FALSE	FALSE	FALSE	FALSE	FALSE	FALSE	FALSE	FALSE	FALSE	FALSE	FALSE
YER062C	FALSE	0.20612	0.104691	0.0314139	0.167808	0.228043	0.16652	0.0992155	0.0622143	0.0147337	0.0330693	0.0966893	0.00474291	0.0357083	0.046463	0.0697591	0.048273	FALSE	FALSE	FALSE	FALSE	FALSE	FALSE	FALSE	FALSE	FALSE	FALSE	FALSE	FALSE	FALSE	FALSE	FALSE	FALSE
YAL007C	FALSE	0.100666	0.123847	0.167402	0.119099	0.0392267	0.032722	0.0934898	0.130472	0.144602	0.17169	0.0937589	0.0716109	0.0241575	0.00289661	0.0378761	0.0327203	FALSE	FALSE	FALSE	FALSE	FALSE	FALSE	FALSE	FALSE	FALSE	FALSE	FALSE	FALSE	FALSE	FALSE	FALSE	FALSE
YKR073C	FALSE	0.0417981	0.148346	0.251203	0.04664	0.196102	0.17852	0.149951	0.0833781	0.0664252	0.0358891	0.117595	0.164465	0.047986	0.0101283	0.22792	0.0436608	FALSE	FALSE	TRUE	FALSE	FALSE	FALSE	FALSE	FALSE	FALSE	FALSE	FALSE	FALSE	FALSE	FALSE	FALSE	FALSE
YJL083W	FALSE	0.0575161	0.0570164	0.0175673	0.0590453	0.0833132	0.0432334	0.0241563	0.0265307	0.0371295	0.108492	0.0120793	0.0661459	0.0763808	0.03103	0.0268003	0.054488	FALSE	FALSE	FALSE	FALSE	FALSE	FALSE	FALSE	FALSE	FALSE	FALSE	FALSE	FALSE	FALSE	FALSE	FALSE	FALSE
YDL228C	FALSE	0.0065138	0.018817	0.0142255	0.0247962	0.0332729	0.0481349	0.0180009	0.00951731	0.0194253	0.0555364	0.00334001	0.00403031	0.0286631	0.0039539	0.023885	0.0478528	FALSE	FALSE	FALSE	FALSE	FALSE	FALSE	FALSE	FALSE	FALSE	FALSE	FALSE	FALSE	FALSE	FALSE	FALSE	FALSE
YGL080W	FALSE	0.00738679	0.0134289	0.0410147	0.0160527	0.0287844	0.015533	0.0072416	0.00111624	0.0282514	0.0455929	0.00510973	0.0265157	0.0235676	0.0101388	0.045152	0.020132	FALSE	FALSE	FALSE	FALSE	FALSE	FALSE	FALSE	FALSE	FALSE	FALSE	FALSE	FALSE	FALSE	FALSE	FALSE	FALSE
YCR090C	FALSE	0.113966	0.0750501	0.107047	0.056745	0.100532	0.0660861	0.0230899	0.0353356	0.0683436	0.127959	0.11598	0.0937701	0.0881555	0.0477177	0.0101093	0.0180829	FALSE	FALSE	FALSE	FALSE	FALSE	FALSE	FALSE	FALSE	FALSE	FALSE	FALSE	FALSE	FALSE	FALSE	FALSE	FALSE
YER048C	FALSE	0.0168274	0.0158139	0.0411878	0.0875092	0.0526859	0.0831043	0.0647404	0.00348287	0.0109725	0.0360854	0.0344016	0.110495	0.0805415	0.0222006	0.0386267	0.0168908	FALSE	FALSE	FALSE	FALSE	FALSE	FALSE	FALSE	FALSE	FALSE	FALSE	FALSE	FALSE	FALSE	FALSE	FALSE	FALSE
YPR023C	FALSE	0.0781765	0.0499641	0.0534798	0.0329821	0.0159432	0.0180471	0.0163524	0.0651582	0.0569027	0.0241908	0.0419456	0.0330621	0.00285985	0.00381406	0.00946821	0.0209496	FALSE	FALSE	FALSE	FALSE	FALSE	FALSE	FALSE	FALSE	FALSE	FALSE	FALSE	FALSE	FALSE	FALSE	FALSE	FALSE
YPR094W	FALSE	0.0136885	0.0159101	0.0905118	0.123463	0.106426	0.140014	0.0631255	0.0231685	0.0131293	0.0202794	0.13107	0.0819111	0.106869	0.0327237	0.0777161	0.0109814	FALSE	FALSE	FALSE	FALSE	FALSE	FALSE	FALSE	FALSE	FALSE	FALSE	FALSE	FALSE	FALSE	FALSE	FALSE	FALSE
YJL073W	FALSE	0.253816	0.178694	0.130402	0.0415878	0.0609321	0.126947	0.172692	0.258273	0.212517	0.146595	0.0341941	0.0024289	0.0092935	0.0713985	0.0673372	0.0102709	TRUE	FALSE	FALSE	FALSE	FALSE	FALSE	FALSE	TRUE	FALSE	FALSE	FALSE	FALSE	FALSE	FALSE	FALSE	FALSE
YDR051C	FALSE	0.0124131	0.0480074	0.0279399	0.0428835	0.00128772	0.0152164	0.00467937	0.0295746	0.0576244	0.0479894	0.0831427	0.0204703	0.0025487	0.0220131	0.0258192	0.0723261	FALSE	FALSE	FALSE	FALSE	FALSE	FALSE	FALSE	FALSE	FALSE	FALSE	FALSE	FALSE	FALSE	FALSE	FALSE	FALSE
YKL195W	FALSE	0.0968595	0.0958639	0.121987	0.159176	0.0897379	0.0809412	0.067819	0.0304153	0.0618454	0.0971131	0.114378	0.152461	0.109905	0.0835573	0.0721835	0.0655021	FALSE	FALSE	FALSE	FALSE	FALSE	FALSE	FALSE	FALSE	FALSE	FALSE	FALSE	FALSE	FALSE	FALSE	FALSE	FALSE
YKL222C	FALSE	0.00801627	0.00699242	0.074069	0.0328856	0.0712806	0.0627038	0.0265328	0.0256469	0.0537046	0.0298498	0.020558	0.0269408	0.0574258	0.0520698	0.0399181	0.00167101	FALSE	FALSE	FALSE	FALSE	FALSE	FALSE	FALSE	FALSE	FALSE	FALSE	FALSE	FALSE	FALSE	FALSE	FALSE	FALSE
YJL167W	FALSE	0.129889	0.0726075	0.0422081	0.0193519	0.0287316	0.0296294	0.0281038	0.0728741	0.0410685	0.0690626	0.0028742	0.0132417	0.0108488	0.00310109	0.0165245	0.00601816	FALSE	FALSE	FALSE	FALSE	FALSE	FALSE	FALSE	FALSE	FALSE	FALSE	FALSE	FALSE	FALSE	FALSE	FALSE	FALSE
YLR070C	FALSE	0.00342648	0.0810003	0.110476	0.125483	0.122009	0.0468532	0.0368064	0.0307935	0.0585197	0.141187	0.0102923	0.0119484	0.0441026	0.0729387	0.0105376	0.067094	FALSE	FALSE	FALSE	FALSE	FALSE	FALSE	FALSE	FALSE	FALSE	FALSE	FALSE	FALSE	FALSE	FALSE	FALSE	FALSE
YGR178C	FALSE	0.0738857	0.0686055	0.0460803	0.036618	0.0430573	0.0465199	0.0395048	0.0295684	0.0533619	0.0367818	0.00247288	0.024135	0.021303	0.0251334	0.0172468	0.0182963	FALSE	FALSE	FALSE	FALSE	FALSE	FALSE	FALSE	FALSE	FALSE	FALSE	FALSE	FALSE	FALSE	FALSE	FALSE	FALSE
YLR007W	FALSE	0.0247471	0.0460954	0.0583859	0.00971322	0.0170429	0.0425014	0.0245744	0.0225362	0.0463208	0.0270129	0.03235	0.0325448	0.0124318	0.0357729	0.00106998	0.00714893	FALSE	FALSE	FALSE	FALSE	FALSE	FALSE	FALSE	FALSE	FALSE	FALSE	FALSE	FALSE	FALSE	FALSE	FALSE	FALSE
YBR083W	FALSE	0.41161	0.271953	0.330957	0.262884	0.190947	0.165745	0.0796203	0.0389222	0.163377	0.370118	0.307945	0.288315	0.268168	0.221887	0.159443	0.110646	TRUE	TRUE	TRUE	TRUE	FALSE	FALSE	FALSE	FALSE	FALSE	TRUE	TRUE	TRUE	TRUE	FALSE	FALSE	FALSE
YHR197W	FALSE	0.058171	0.0668736	0.102741	0.0898819	0.109606	0.122973	0.101726	0.0246067	0.0217388	0.0850739	0.0987227	0.079224	0.1159	0.084393	0.0847126	0.0976159	FALSE	FALSE	FALSE	FALSE	FALSE	FALSE	FALSE	FALSE	FALSE	FALSE	FALSE	FALSE	FALSE	FALSE	FALSE	FALSE
YPL184C	FALSE	0.0346608	0.0152399	0.060213	0.038768	0.0234493	0.0171116	0.00753491	0.00940176	0.0183578	0.00497244	0.0583624	0.0059619	0.00889657	0.0385976	0.0450098	0.0298475	FALSE	FALSE	FALSE	FALSE	FALSE	FALSE	FALSE	FALSE	FALSE	FALSE	FALSE	FALSE	FALSE	FALSE	FALSE	FALSE
YJL093C	FALSE	0.0150416	0.0321452	0.0385772	0.00680076	0.0032694	0.0034519	0.00489372	0.00858682	0.0345094	0.0243601	0.0554909	0.0543506	0.00375655	0.0185807	0.0456362	0.00418023	FALSE	FALSE	FALSE	FALSE	FALSE	FALSE	FALSE	FALSE	FALSE	FALSE	FALSE	FALSE	FALSE	FALSE	FALSE	FALSE
YPR195C	FALSE	0.0306457	0.0160245	0.0749505	0.0857682	0.0844785	0.0170974	0.111049	0.0654035	0.070066	0.0128064	0.0646467	0.0447505	0.037068	0.00758994	0.0650357	0.0517573	FALSE	FALSE	FALSE	FALSE	FALSE	FALSE	FALSE	FALSE	FALSE	FALSE	FALSE	FALSE	FALSE	FALSE	FALSE	FALSE
YDR282C	FALSE	0.0905168	0.0789151	0.0433586	0.050546	0.0196164	0.0519112	0.021308	0.0876618	0.0283632	0.104412	0.0678555	0.0825969	0.0302236	0.0699026	0.00804633	0.0119636	FALSE	FALSE	FALSE	FALSE	FALSE	FALSE	FALSE	FALSE	FALSE	FALSE	FALSE	FALSE	FALSE	FALSE	FALSE	FALSE
YMR183C	FALSE	0.102491	0.0648839	0.058199	0.0346149	0.0288973	0.0874564	0.0957934	0.151979	0.103963	0.0458582	0.00786566	0.0270827	0.0359161	0.0241843	0.0327622	0.029904	FALSE	FALSE	FALSE	FALSE	FALSE	FALSE	FALSE	FALSE	FALSE	FALSE	FALSE	FALSE	FALSE	FALSE	FALSE	FALSE
YKL148C	FALSE	0.234814	0.198941	0.233385	0.166398	0.115387	0.02827	0.0506334	0.118088	0.187707	0.206158	0.126197	0.0859886	0.0840579	0.114502	0.100396	0.0565733	FALSE	FALSE	FALSE	FALSE	FALSE	FALSE	FALSE	FALSE	FALSE	FALSE	FALSE	FALSE	FALSE	FALSE	FALSE	FALSE
YOR204W	FALSE	0.0156467	0.025284	0.0227785	0.0401576	0.00591955	0.00731646	0.0123324	0.0614685	0.0428218	0.0354693	0.0234923	0.0173448	0.0126375	0.0153095	0.0090912	0.0154463	FALSE	FALSE	FALSE	FALSE	FALSE	FALSE	FALSE	FALSE	FALSE	FALSE	FALSE	FALSE	FALSE	FALSE	FALSE	FALSE
YNL048W	FALSE	0.0156197	0.00235012	0.0156076	0.06255	0.0843892	0.0488228	0.0397542	0.0460528	0.0377011	0.0219772	0.03728	0.0531372	0.0704965	0.0286443	0.0590954	0.011359	FALSE	FALSE	FALSE	FALSE	FALSE	FALSE	FALSE	FALSE	FALSE	FALSE	FALSE	FALSE	FALSE	FALSE	FALSE	FALSE
YLR132C	FALSE	0.079997	0.00827317	0.0346362	0.0715165	0.00672107	0.0218611	0.10762	0.121386	0.0262749	0.0330957	0.0558817	0.0246839	0.0506798	0.0851114	0.061769	0.0135626	FALSE	FALSE	FALSE	FALSE	FALSE	FALSE	FALSE	FALSE	FALSE	FALSE	FALSE	FALSE	FALSE	FALSE	FALSE	FALSE
YNL305C	FALSE	0.0836533	0.0257599	0.0553464	0.0214175	0.0280514	0.0576683	0.0347953	0.00989318	0.00769716	0.0411475	0.0142047	0.0376505	0.02573	0.0266974	0.0410745	0.0487516	FALSE	FALSE	FALSE	FALSE	FALSE	FALSE	FALSE	FALSE	FALSE	FALSE	FALSE	FALSE	FALSE	FALSE	FALSE	FALSE
YDL171C	FALSE	0.0575932	0.0316821	0.0111018	0.0321636	0.0762543	0.061771	0.0765959	0.0705541	0.0543561	0.0660243	0.00564911	0.037152	0.0438347	0.0621963	0.0620459	0.0501224	FALSE	FALSE	FALSE	FALSE	FALSE	FALSE	FALSE	FALSE	FALSE	FALSE	FALSE	FALSE	FALSE	FALSE	FALSE	FALSE
YIL103W	FALSE	0.00288927	0.0241954	0.0283014	0.0648932	0.0486151	0.0635296	0.0459765	0.0220707	0.0172659	0.0668373	0.0133013	0.0740818	0.0531678	0.0179411	0.00994669	0.0455712	FALSE	FALSE	FALSE	FALSE	FALSE	FALSE	FALSE	FALSE	FALSE	FALSE	FALSE	FALSE	FALSE	FALSE	FALSE	FALSE
YOL160W	FALSE	0.106297	0.0403	0.0277111	0.0117817	0.0580403	0.0897717	0.0543477	0.22981	0.193685	0.249499	0.0193424	0.0569838	0.0753811	0.0261595	0.0141247	0.100238	FALSE	FALSE	FALSE	FALSE	FALSE	FALSE	FALSE	FALSE	FALSE	FALSE	FALSE	FALSE	FALSE	FALSE	FALSE	FALSE
YLR382C	FALSE	0.22051	0.1368	0.104277	0.00294725	0.0506902	0.105994	0.178074	0.165713	0.13435	0.0918321	0.0458767	0.0263323	0.0205741	0.0118607	0.0315535	0.0427358	FALSE	FALSE	FALSE	FALSE	FALSE	FALSE	FALSE	FALSE	FALSE	FALSE	FALSE	FALSE	FALSE	FALSE	FALSE	FALSE
YLR440C	FALSE	0.0646324	0.0325125	0.0270379	0.0440523	0.00508219	0.0118655	0.00199511	0.00345529	0.0641565	0.0678581	0.0348687	0.0086809	0.00739635	0.035586	0.0370896	0.027474	FALSE	FALSE	FALSE	FALSE	FALSE	FALSE	FALSE	FALSE	FALSE	FALSE	FALSE	FALSE	FALSE	FALSE	FALSE	FALSE
YNR057C	FALSE	0.032566	0.0301785	0.0246901	0.0705226	0.0398485	0.0225337	0.0329143	0.0290077	0.0347233	0.0723925	0.0143256	0.0184875	0.0336937	0.0604168	0.0172359	0.0399411	FALSE	FALSE	FALSE	FALSE	FALSE	FALSE	FALSE	FALSE	FALSE	FALSE	FALSE	FALSE	FALSE	FALSE	FALSE	FALSE
YMR219W	FALSE	0.00433077	0.0044561	0.0305033	0.0138116	0.0491879	0.0519476	0.018359	0.0362177	0.0687574	0.0478885	0.037129	0.0602479	0.0105801	0.00698342	0.0516443	0.00107116	FALSE	FALSE	FALSE	FALSE	FALSE	FALSE	FALSE	FALSE	FALSE	FALSE	FALSE	FALSE	FALSE	FALSE	FALSE	FALSE
YOL110W	FALSE	0.00247762	0.0181038	0.0595383	0.130431	0.132096	0.152409	0.125962	0.1392	0.0837799	0.125365	0.0961837	0.202548	0.0742559	0.175161	0.135177	0.13108	FALSE	FALSE	FALSE	FALSE	FALSE	FALSE	FALSE	FALSE	FALSE	FALSE	FALSE	FALSE	FALSE	FALSE	FALSE	FALSE
YIL008W	FALSE	0.0514641	0.0212343	0.0117003	0.0302997	0.0167098	0.00652432	0.0345793	0.0613925	0.0116469	0.013563	0.0187772	0.0266877	0.0105104	0.00493649	0.0300902	0.0531706	FALSE	FALSE	FALSE	FALSE	FALSE	FALSE	FALSE	FALSE	FALSE	FALSE	FALSE	FALSE	FALSE	FALSE	FALSE	FALSE
YKL065C	FALSE	0.0318121	0.0242732	0.0496476	0.0254487	0.0227713	0.0229746	0.0323271	0.0725569	0.0675324	0.00178509	0.0228806	0.01507	0.0143483	0.00722867	0.0400604	0.0174154	FALSE	FALSE	FALSE	FALSE	FALSE	FALSE	FALSE	FALSE	FALSE	FALSE	FALSE	FALSE	FALSE	FALSE	FALSE	FALSE
YDR394W	FALSE	0.00369854	0.0522578	0.0792215	0.0746333	0.0532718	0.00117414	0.0206392	0.00998935	0.0147205	0.0175468	0.0793499	0.0508697	0.0533957	0.0647611	0.0269749	0.0299429	FALSE	FALSE	FALSE	FALSE	FALSE	FALSE	FALSE	FALSE	FALSE	FALSE	FALSE	FALSE	FALSE	FALSE	FALSE	FALSE
YJL045W	FALSE	0.0903139	0.00523761	0.0597832	0.0552328	0.00642529	0.051468	0.0944732	0.1107	0.155929	0.0481817	0.0389986	0.00160535	0.0443618	0.0715459	0.103532	0.11882	FALSE	FALSE	FALSE	FALSE	FALSE	FALSE	FALSE	FALSE	FALSE	FALSE	FALSE	FALSE	FALSE	FALSE	FALSE	FALSE
YPL135W	FALSE	0.0915681	0.023056	0.0166492	0.0638706	0.0738352	0.129672	0.0585331	0.11735	0.112155	0.0186521	0.0652821	0.0169852	0.0017818	0.103691	0.116481	0.0881983	FALSE	FALSE	FALSE	FALSE	FALSE	FALSE	FALSE	FALSE	FALSE	FALSE	FALSE	FALSE	FALSE	FALSE	FALSE	FALSE
YKL161C	FALSE	0.0284592	0.0391344	0.0645185	0.115506	0.0783664	0.0310017	0.0121516	0.143914	0.124162	0.150188	0.0298101	0.00578065	0.0291749	0.0284962	0.0168027	0.0540209	FALSE	FALSE	FALSE	FALSE	FALSE	FALSE	FALSE	FALSE	FALSE	FALSE	FALSE	FALSE	FALSE	FALSE	FALSE	FALSE
YBL020W	FALSE	0.0782098	0.0760311	0.061781	0.0274954	0.0256812	0.0329141	0.0358939	0.0483748	0.0364436	0.0733724	0.0746464	0.0625708	0.0190235	0.0132312	0.0364255	0.00699722	FALSE	FALSE	FALSE	FALSE	FALSE	FALSE	FALSE	FALSE	FALSE	FALSE	FALSE	FALSE	FALSE	FALSE	FALSE	FALSE
YJL012C	FALSE	0.0716571	0.0440367	0.0250857	0.0200189	0.00244885	0.00257126	0.00793986	0.00687747	0.0237998	0.00534164	0.0268367	0.0266289	0.0420382	0.0045492	0.00780524	0.0313573	FALSE	FALSE	FALSE	FALSE	FALSE	FALSE	FALSE	FALSE	FALSE	FALSE	FALSE	FALSE	FALSE	FALSE	FALSE	FALSE
YNL318C	FALSE	0.12655	0.0234769	0.0652805	0.0528924	0.0271744	0.020619	0.155275	0.171362	0.0686812	0.0986265	0.113292	0.0451093	0.167798	0.116774	0.0506624	0.0630229	FALSE	FALSE	FALSE	FALSE	FALSE	FALSE	FALSE	FALSE	FALSE	FALSE	FALSE	FALSE	FALSE	FALSE	FALSE	FALSE
YML072C	FALSE	0.00659389	0.017816	0.0739152	0.153319	0.1705	0.124397	0.0581675	0.0616993	0.0269465	0.0667587	0.111128	0.130158	0.155531	0.102396	0.0564417	0.0176229	FALSE	FALSE	FALSE	FALSE	FALSE	FALSE	FALSE	FALSE	FALSE	FALSE	FALSE	FALSE	FALSE	FALSE	FALSE	FALSE
YNL077W	FALSE	0.151831	0.0884633	0.0861189	0.0112368	0.056932	0.0809882	0.078345	0.0669538	0.0694011	0.0750747	0.00656494	0.00258614	0.0182101	0.0545726	0.0225299	0.0548097	FALSE	FALSE	FALSE	FALSE	FALSE	FALSE	FALSE	FALSE	FALSE	FALSE	FALSE	FALSE	FALSE	FALSE	FALSE	FALSE
YER077C	FALSE	0.139128	0.102558	0.0494752	0.0882157	0.123385	0.146893	0.121993	0.131518	0.0906473	0.0641833	0.0488302	0.060836	0.109658	0.106274	0.102197	0.0712384	FALSE	FALSE	FALSE	FALSE	FALSE	FALSE	FALSE	FALSE	FALSE	FALSE	FALSE	FALSE	FALSE	FALSE	FALSE	FALSE
YPL157W	FALSE	0.150739	0.0505261	0.0297477	0.0538279	0.0115225	0.0516782	0.0821002	0.119564	0.00299413	0.118487	0.191883	0.0995334	0.0750626	0.0451353	0.0484691	0.0410659	FALSE	FALSE	FALSE	FALSE	FALSE	FALSE	FALSE	FALSE	FALSE	FALSE	FALSE	FALSE	FALSE	FALSE	FALSE	FALSE
YGR023W	FALSE	0.174848	0.149843	0.098293	0.073385	0.107298	0.152185	0.109346	0.176233	0.136346	0.059999	0.00151578	0.0145782	0.0167235	0.0529426	0.0379679	0.087058	FALSE	FALSE	FALSE	FALSE	FALSE	FALSE	FALSE	FALSE	FALSE	FALSE	FALSE	FALSE	FALSE	FALSE	FALSE	FALSE
YDL101C	TRUE	0.280278	0.208926	0.219428	0.10513	0.0118831	0.0523356	0.109299	0.204079	0.246714	0.298903	0.179979	0.0655508	0.0213916	0.0383077	0.0299372	0.0440821	TRUE	FALSE	FALSE	FALSE	FALSE	FALSE	FALSE	FALSE	FALSE	TRUE	FALSE	FALSE	FALSE	FALSE	FALSE	FALSE
YAR050W	FALSE	0.0122655	0.0109897	0.0560455	0.0519147	0.0667721	0.0195395	0.0901908	0.0139275	0.111723	0.0843931	0.0500973	0.0418479	0.082273	0.13176	0.031287	0.0575887	FALSE	FALSE	FALSE	FALSE	FALSE	FALSE	FALSE	FALSE	FALSE	FALSE	FALSE	FALSE	FALSE	FALSE	FALSE	FALSE
YBL035C	FALSE	0.364439	0.250462	0.217382	0.0498069	0.0857888	0.250505	0.368949	0.580602	0.428911	0.255303	0.0157452	0.07491	0.143998	0.145984	0.142053	0.131895	TRUE	TRUE	FALSE	FALSE	FALSE	TRUE	TRUE	TRUE	TRUE	TRUE	FALSE	FALSE	FALSE	FALSE	FALSE	FALSE
YGL231C	FALSE	0.0207902	0.024091	0.0187515	0.0650123	0.0305019	0.0421343	0.0435445	0.0282018	0.0526016	0.0180878	0.0346521	0.0115061	0.0273656	0.00971275	0.00646433	0.0131822	FALSE	FALSE	FALSE	FALSE	FALSE	FALSE	FALSE	FALSE	FALSE	FALSE	FALSE	FALSE	FALSE	FALSE	FALSE	FALSE
YDL206W	FALSE	0.0460462	0.00952299	0.137501	0.0675456	0.118819	0.0805911	0.0692936	0.0312732	0.030314	0.0573364	0.0467972	0.0461522	0.0303442	0.144022	0.100395	0.0548374	FALSE	FALSE	FALSE	FALSE	FALSE	FALSE	FALSE	FALSE	FALSE	FALSE	FALSE	FALSE	FALSE	FALSE	FALSE	FALSE
YNR061C	FALSE	0.0217479	0.0382413	0.0053575	0.0440181	0.0569497	0.095345	0.070578	0.0344412	0.0374346	0.0603678	0.0665362	0.0205872	0.0314542	0.0783057	0.047573	0.0205914	FALSE	FALSE	FALSE	FALSE	FALSE	FALSE	FALSE	FALSE	FALSE	FALSE	FALSE	FALSE	FALSE	FALSE	FALSE	FALSE
YDR003W	FALSE	0.0202543	0.0104663	0.0133444	0.0219317	0.0315264	0.00349912	0.0171417	0.0163542	0.0343489	0.0376761	0.0237396	0.0407052	0.0404044	0.0250631	0.0274332	0.0065736	FALSE	FALSE	FALSE	FALSE	FALSE	FALSE	FALSE	FALSE	FALSE	FALSE	FALSE	FALSE	FALSE	FALSE	FALSE	FALSE
YPL242C	FALSE	0.306672	0.319823	0.351479	0.136551	0.0722818	0.209284	0.257282	0.395779	0.390006	0.316954	0.147734	0.100795	0.0203425	0.0774416	0.143192	0.167309	TRUE	TRUE	TRUE	FALSE	FALSE	FALSE	TRUE	TRUE	TRUE	TRUE	FALSE	FALSE	FALSE	FALSE	FALSE	FALSE
YFL053W	FALSE	0.0860247	0.0586359	0.16863	0.0939456	0.147269	0.0884921	0.0282778	0.00104986	0.077768	0.156564	0.0187215	0.125542	0.0840537	0.100509	0.105162	0.062419	FALSE	FALSE	FALSE	FALSE	FALSE	FALSE	FALSE	FALSE	FALSE	FALSE	FALSE	FALSE	FALSE	FALSE	FALSE	FALSE
YGR002C	FALSE	0.0992932	0.0809321	0.0758788	0.0286647	0.0344566	0.0509922	0.0225638	0.0694638	0.0900306	0.0978018	0.0248803	0.00153208	0.0579876	0.00632305	0.0106015	0.0137888	FALSE	FALSE	FALSE	FALSE	FALSE	FALSE	FALSE	FALSE	FALSE	FALSE	FALSE	FALSE	FALSE	FALSE	FALSE	FALSE
YLR213C	FALSE	0.0906299	0.113557	0.0833357	0.0102899	0.055316	0.0286441	0.0327669	0.0676391	0.00338174	0.0570191	0.00382122	0.0686181	0.0594502	0.0343649	0.00633872	0.0131371	FALSE	FALSE	FALSE	FALSE	FALSE	FALSE	FALSE	FALSE	FALSE	FALSE	FALSE	FALSE	FALSE	FALSE	FALSE	FALSE
YDR034C-A	FALSE	0.161662	0.0628407	0.177794	0.0893802	0.136923	0.0971739	0.103961	0.0934154	0.107821	0.0365026	0.0497611	0.0467514	0.120054	0.00665354	0.0152235	0.0668047	FALSE	FALSE	FALSE	FALSE	FALSE	FALSE	FALSE	FALSE	FALSE	FALSE	FALSE	FALSE	FALSE	FALSE	FALSE	FALSE
YJL177W	FALSE	0.0395682	0.0072747	0.00155606	0.0132689	0.0451486	0.0143466	0.00941527	0.0145566	0.0304769	0.011229	0.0205374	0.00591782	0.0165441	0.0333372	0.0442052	0.0301825	FALSE	FALSE	FALSE	FALSE	FALSE	FALSE	FALSE	FALSE	FALSE	FALSE	FALSE	FALSE	FALSE	FALSE	FALSE	FALSE
YGL263W	FALSE	0.050936	0.0290365	0.0376088	0.0261584	0.0559863	0.0844801	0.110443	0.063177	0.0867354	0.058034	0.0145331	0.0128835	0.00692483	0.0798602	0.0699286	0.115967	FALSE	FALSE	FALSE	FALSE	FALSE	FALSE	FALSE	FALSE	FALSE	FALSE	FALSE	FALSE	FALSE	FALSE	FALSE	FALSE
YJR095W	FALSE	0.0592519	0.0814932	0.186849	0.120151	0.0584237	0.086336	0.135146	0.0229739	0.139869	0.194555	0.290218	0.0507027	0.0374387	0.0277912	0.0226562	0.10033	FALSE	FALSE	FALSE	FALSE	FALSE	FALSE	FALSE	FALSE	FALSE	FALSE	TRUE	FALSE	FALSE	FALSE	FALSE	FALSE
YMR179W	FALSE	0.407853	0.250706	0.170417	0.0380076	0.158767	0.313963	0.460982	0.637764	0.493943	0.220072	0.0328462	0.221109	0.222928	0.195517	0.150536	0.149104	TRUE	TRUE	FALSE	FALSE	FALSE	TRUE	TRUE	TRUE	TRUE	FALSE	FALSE	FALSE	FALSE	FALSE	FALSE	FALSE
YDR005C	FALSE	0.115157	0.035528	0.0424637	0.0262829	0.0333372	0.0263915	0.0467534	0.0402181	0.0511822	0.0670773	0.110702	0.0567779	0.0157103	0.0428629	0.025815	0.0386681	FALSE	FALSE	FALSE	FALSE	FALSE	FALSE	FALSE	FALSE	FALSE	FALSE	FALSE	FALSE	FALSE	FALSE	FALSE	FALSE
YOR008C-A	FALSE	0.104236	0.108289	0.0271061	0.185927	0.0542404	0.00828012	0.197384	0.0650091	0.245851	0.189938	0.0735308	0.0329037	0.0710447	0.0873142	0.069204	0.18363	FALSE	FALSE	FALSE	FALSE	FALSE	FALSE	FALSE	FALSE	FALSE	FALSE	FALSE	FALSE	FALSE	FALSE	FALSE	FALSE
YDL023C	FALSE	0.472306	0.365465	0.301251	0.125378	0.0222975	0.0848819	0.108791	0.142939	0.172795	0.19987	0.0150263	0.109665	0.103568	0.137901	0.169747	0.30327	TRUE	TRUE	TRUE	FALSE	FALSE	FALSE	FALSE	FALSE	FALSE	FALSE	FALSE	FALSE	FALSE	FALSE	FALSE	TRUE
YBR299W	FALSE	0.0824632	0.0105241	0.0897188	0.0534487	0.172523	0.14532	0.016693	0.0489361	0.0175864	0.105359	0.0557526	0.0805978	0.069535	0.0575427	0.00562694	0.0105314	FALSE	FALSE	FALSE	FALSE	FALSE	FALSE	FALSE	FALSE	FALSE	FALSE	FALSE	FALSE	FALSE	FALSE	FALSE	FALSE
YKL045W	FALSE	0.319118	0.235389	0.167108	0.0110115	0.0989609	0.222346	0.299632	0.365738	0.332925	0.214769	0.0243769	0.0456256	0.109369	0.1282	0.0856239	0.047185	TRUE	FALSE	FALSE	FALSE	FALSE	FALSE	TRUE	TRUE	TRUE	FALSE	FALSE	FALSE	FALSE	FALSE	FALSE	FALSE
YJR137C	FALSE	0.0807809	0.0315008	0.0752197	0.187602	0.18615	0.122222	0.0837548	0.0181859	0.0676112	0.0977706	0.0712529	0.0717972	0.0967247	0.0523561	0.043713	0.00669204	FALSE	FALSE	FALSE	FALSE	FALSE	FALSE	FALSE	FALSE	FALSE	FALSE	FALSE	FALSE	FALSE	FALSE	FALSE	FALSE
YOR386W	FALSE	0.109508	0.128581	0.197535	0.121374	0.0571782	0.0670487	0.0234134	0.0594945	0.114729	0.069501	0.0291373	0.132969	0.128676	0.0746348	0.102574	0.0995409	FALSE	FALSE	FALSE	FALSE	FALSE	FALSE	FALSE	FALSE	FALSE	FALSE	FALSE	FALSE	FALSE	FALSE	FALSE	FALSE
YNL157W	FALSE	0.0370425	0.040106	0.0650583	0.00522804	0.0230309	0.0382947	0.0135681	0.0692672	0.0569008	0.034967	0.00254633	0.00430121	0.0115417	0.0312671	0.0101871	0.00948246	FALSE	FALSE	FALSE	FALSE	FALSE	FALSE	FALSE	FALSE	FALSE	FALSE	FALSE	FALSE	FALSE	FALSE	FALSE	FALSE
YLL020C	FALSE	0.0288847	0.0767076	0.0131063	0.0598267	0.0416202	0.018845	0.0527947	0.141014	0.0220592	0.00205583	0.181623	0.0610528	0.0200364	0.105001	0.00321818	0.0699761	FALSE	FALSE	FALSE	FALSE	FALSE	FALSE	FALSE	FALSE	FALSE	FALSE	FALSE	FALSE	FALSE	FALSE	FALSE	FALSE
YOR302W	FALSE	0.173593	0.002593	0.110908	0.00250604	0.0392303	0.03672	0.00707527	0.0223771	0.189198	0.0205211	0.0840956	0.0546997	0.030162	0.0387398	0.102592	0.0294614	FALSE	FALSE	FALSE	FALSE	FALSE	FALSE	FALSE	FALSE	FALSE	FALSE	FALSE	FALSE	FALSE	FALSE	FALSE	FALSE
YGL047W	FALSE	0.0751223	0.170758	0.192304	0.235722	0.123288	0.150598	0.0336027	0.0642086	0.0462683	0.205765	0.228029	0.136663	0.100593	0.148534	0.127029	0.0756898	FALSE	FALSE	FALSE	FALSE	FALSE	FALSE	FALSE	FALSE	FALSE	FALSE	FALSE	FALSE	FALSE	FALSE	FALSE	FALSE
YDR254W	FALSE	0.0582721	0.0205358	0.0357825	0.0499426	0.0749587	0.0691781	0.0402052	0.0213089	0.0355729	0.0430873	0.0361514	0.0757555	0.0721844	0.008408	0.0299938	0.00120275	FALSE	FALSE	FALSE	FALSE	FALSE	FALSE	FALSE	FALSE	FALSE	FALSE	FALSE	FALSE	FALSE	FALSE	FALSE	FALSE
YJL181W	FALSE	0.250045	0.164528	0.13934	0.0270067	0.101266	0.16696	0.262895	0.245792	0.339119	0.15991	0.00900091	0.0388543	0.0868067	0.0933818	0.0883996	0.0943697	TRUE	FALSE	FALSE	FALSE	FALSE	FALSE	TRUE	FALSE	TRUE	FALSE	FALSE	FALSE	FALSE	FALSE	FALSE	FALSE
YPL186C	FALSE	0.0741143	0.153523	0.220158	0.190087	0.236086	0.123351	0.0112027	0.155034	0.0598626	0.158117	0.0576743	0.139939	0.0719731	0.122718	0.136958	0.147669	FALSE	FALSE	FALSE	FALSE	FALSE	FALSE	FALSE	FALSE	FALSE	FALSE	FALSE	FALSE	FALSE	FALSE	FALSE	FALSE
YGL043W	FALSE	0.0348613	0.04865	0.0819356	0.047283	0.0433035	0.0757372	0.0639647	0.0296774	0.0167983	0.111881	0.0407056	0.070178	0.0414784	0.0457731	0.0582256	0.00544276	FALSE	FALSE	FALSE	FALSE	FALSE	FALSE	FALSE	FALSE	FALSE	FALSE	FALSE	FALSE	FALSE	FALSE	FALSE	FALSE
YCR037C	FALSE	0.0373333	0.0333313	0.0881301	0.0441334	0.0201729	0.0584488	0.0554574	0.0828622	0.0861247	0.0494635	0.006601	0.00160893	0.0244875	0.0222191	0.0286231	0.0609432	FALSE	FALSE	FALSE	FALSE	FALSE	FALSE	FALSE	FALSE	FALSE	FALSE	FALSE	FALSE	FALSE	FALSE	FALSE	FALSE
YER186C	FALSE	0.0216891	0.0414845	0.0400226	0.00149563	0.00197733	0.0348587	0.0314298	0.0475455	0.0648171	0.0760671	0.0334652	0.0301157	0.0344075	0.0162671	0.0256893	0.0173248	FALSE	FALSE	FALSE	FALSE	FALSE	FALSE	FALSE	FALSE	FALSE	FALSE	FALSE	FALSE	FALSE	FALSE	FALSE	FALSE
YBR251W	FALSE	0.0284376	0.0386696	0.0428302	0.0919828	0.0789061	0.0700419	0.0420056	0.0120642	0.038459	0.0740377	0.0824658	0.0914684	0.0912546	0.00326962	0.0283517	0.00603128	FALSE	FALSE	FALSE	FALSE	FALSE	FALSE	FALSE	FALSE	FALSE	FALSE	FALSE	FALSE	FALSE	FALSE	FALSE	FALSE
YOR270C	FALSE	0.00769888	0.00723951	0.0124002	0.0233176	0.0326967	0.0142902	0.0209398	0.0286595	0.0327551	0.0344374	0.0298905	0.0174327	0.00851661	0.026028	0.0208243	0.0126243	FALSE	FALSE	FALSE	FALSE	FALSE	FALSE	FALSE	FALSE	FALSE	FALSE	FALSE	FALSE	FALSE	FALSE	FALSE	FALSE
YGR262C	FALSE	0.0198547	0.0523976	0.0836684	0.0294286	0.0026946	0.0277806	0.0129053	0.00998013	0.0162552	0.0465621	0.0560154	0.0145063	0.0326323	0.0416547	0.0186446	0.0251807	FALSE	FALSE	FALSE	FALSE	FALSE	FALSE	FALSE	FALSE	FALSE	FALSE	FALSE	FALSE	FALSE	FALSE	FALSE	FALSE
YOR370C	FALSE	0.0149925	0.0246702	0.0329503	0.0483887	0.0467933	0.0627578	0.0147167	0.0282273	0.0271979	0.0507729	0.00308104	0.0548874	0.0280252	0.01893	0.0460514	0.00155303	FALSE	FALSE	FALSE	FALSE	FALSE	FALSE	FALSE	FALSE	FALSE	FALSE	FALSE	FALSE	FALSE	FALSE	FALSE	FALSE
YOR190W	FALSE	0.189104	0.159868	0.0786978	0.0308992	0.0731528	0.109215	0.170171	0.110885	0.0939076	0.131933	0.013343	0.0179583	0.0361781	0.0357395	0.0822184	0.0557403	FALSE	FALSE	FALSE	FALSE	FALSE	FALSE	FALSE	FALSE	FALSE	FALSE	FALSE	FALSE	FALSE	FALSE	FALSE	FALSE
YMR292W	FALSE	0.168951	0.164129	0.125189	0.139734	0.054418	0.0392211	0.0400583	0.06213	0.121427	0.137397	0.202519	0.0717752	0.0204847	0.0917663	0.0256262	0.0381512	FALSE	FALSE	FALSE	FALSE	FALSE	FALSE	FALSE	FALSE	FALSE	FALSE	FALSE	FALSE	FALSE	FALSE	FALSE	FALSE
YOR243C	FALSE	0.0178457	0.00149605	0.00820898	0.00868778	0.0186573	0.0419415	0.0296013	0.0278945	0.00163663	0.0166902	0.0143227	0.014036	0.00906186	0.0140287	0.0209526	0.026196	FALSE	FALSE	FALSE	FALSE	FALSE	FALSE	FALSE	FALSE	FALSE	FALSE	FALSE	FALSE	FALSE	FALSE	FALSE	FALSE
YDR183W	FALSE	0.14675	0.0933157	0.0576051	0.00277269	0.0647868	0.184164	0.142986	0.0739473	0.107243	0.0398611	0.00384944	0.0519638	0.0221428	0.0782357	0.00656575	0.0284291	FALSE	FALSE	FALSE	FALSE	FALSE	FALSE	FALSE	FALSE	FALSE	FALSE	FALSE	FALSE	FALSE	FALSE	FALSE	FALSE
YLR456W	FALSE	0.0869819	0.0184734	0.0702645	0.0744962	0.0621483	0.0598966	0.0661692	0.0826045	0.0145028	0.184984	0.0885438	0.0516814	0.0582847	0.065899	0.00881415	0.0604779	FALSE	FALSE	FALSE	FALSE	FALSE	FALSE	FALSE	FALSE	FALSE	FALSE	FALSE	FALSE	FALSE	FALSE	FALSE	FALSE
YLR025W	FALSE	0.0689474	0.0707356	0.145967	0.121703	0.0550405	0.0297017	0.025062	0.0778492	0.0927082	0.103804	0.0542707	0.104967	0.0850392	0.0072737	0.0548013	0.00818505	FALSE	FALSE	FALSE	FALSE	FALSE	FALSE	FALSE	FALSE	FALSE	FALSE	FALSE	FALSE	FALSE	FALSE	FALSE	FALSE
YNL255C	FALSE	0.00232419	0.00685477	0.0268438	0.0350934	0.044937	0.0266754	0.0259517	0.0293901	0.0163094	0.0625001	0.0791876	0.00990764	0.0159	0.0460237	0.0385662	0.0222834	FALSE	FALSE	FALSE	FALSE	FALSE	FALSE	FALSE	FALSE	FALSE	FALSE	FALSE	FALSE	FALSE	FALSE	FALSE	FALSE
YLR119W	FALSE	0.0711719	0.0625152	0.169308	0.13532	0.0782197	0.0546201	0.0798044	0.0332272	0.0716726	0.172638	0.224908	0.0572621	0.0105081	0.10584	0.0638583	0.020177	FALSE	FALSE	FALSE	FALSE	FALSE	FALSE	FALSE	FALSE	FALSE	FALSE	FALSE	FALSE	FALSE	FALSE	FALSE	FALSE
YLL011W	FALSE	0.0308022	0.0216768	0.0292162	0.0416264	0.0556361	0.0657885	0.0291543	0.0176946	0.0143459	0.0425162	0.0136135	0.0174537	0.0536994	0.0329417	0.0352425	0.0764315	FALSE	FALSE	FALSE	FALSE	FALSE	FALSE	FALSE	FALSE	FALSE	FALSE	FALSE	FALSE	FALSE	FALSE	FALSE	FALSE
YBL050W	FALSE	0.00945937	0.050866	0.0677783	0.118079	0.122466	0.0807198	0.0551016	0.0238087	0.0656299	0.0835341	0.0979249	0.0591816	0.0662827	0.0317225	0.0515518	0.0221824	FALSE	FALSE	FALSE	FALSE	FALSE	FALSE	FALSE	FALSE	FALSE	FALSE	FALSE	FALSE	FALSE	FALSE	FALSE	FALSE
YML096W	FALSE	0.0971771	0.104203	0.0903512	0.0464135	0.0488321	0.025715	0.0170238	0.0331911	0.0509793	0.0840548	0.102436	0.0529569	0.0520299	0.0283726	0.0437132	0.0417226	FALSE	FALSE	FALSE	FALSE	FALSE	FALSE	FALSE	FALSE	FALSE	FALSE	FALSE	FALSE	FALSE	FALSE	FALSE	FALSE
YBR159W	FALSE	0.0473142	0.0601333	0.0653658	0.0563309	0.00841303	0.0331696	0.0532554	0.0255391	0.00278999	0.0276731	0.0615646	0.00927153	0.00267251	0.0488662	0.0301799	0.00573918	FALSE	FALSE	FALSE	FALSE	FALSE	FALSE	FALSE	FALSE	FALSE	FALSE	FALSE	FALSE	FALSE	FALSE	FALSE	FALSE
YPL074W	FALSE	0.0653178	0.0541876	0.032064	0.00584451	0.0478416	0.0661983	0.0289543	0.0905182	0.077681	0.0622689	0.0117135	0.00219677	0.0350726	0.0574251	0.0349965	0.0112578	FALSE	FALSE	FALSE	FALSE	FALSE	FALSE	FALSE	FALSE	FALSE	FALSE	FALSE	FALSE	FALSE	FALSE	FALSE	FALSE
YOR276W	FALSE	0.0237721	0.0175143	0.0261849	0.0316234	0.0449686	0.0250521	0.00286389	0.0132776	0.0433481	0.0238239	0.0357143	0.0395161	0.0529542	0.0133053	0.0157018	0.00531002	FALSE	FALSE	FALSE	FALSE	FALSE	FALSE	FALSE	FALSE	FALSE	FALSE	FALSE	FALSE	FALSE	FALSE	FALSE	FALSE
YCR071C	FALSE	0.0440244	0.0175283	0.0972487	0.0955702	0.112061	0.065885	0.0617786	0.0183426	0.0510054	0.160222	0.0654053	0.0819567	0.0641023	0.0537433	0.0202982	0.0323482	FALSE	FALSE	FALSE	FALSE	FALSE	FALSE	FALSE	FALSE	FALSE	FALSE	FALSE	FALSE	FALSE	FALSE	FALSE	FALSE
YLR059C	FALSE	0.0253569	0.00912394	0.0367996	0.0110466	0.0233922	0.0445166	0.0595292	0.0338679	0.0334071	0.045896	0.03299	0.041984	0.00507935	0.0483723	0.0281998	0.0258869	FALSE	FALSE	FALSE	FALSE	FALSE	FALSE	FALSE	FALSE	FALSE	FALSE	FALSE	FALSE	FALSE	FALSE	FALSE	FALSE
YER150W	FALSE	0.444594	0.183795	0.0106738	0.0474597	0.221735	0.239519	0.28242	0.288598	0.165315	0.0117672	0.0277091	0.0226843	0.0487831	0.0965928	0.0902195	0.0606149	TRUE	FALSE	FALSE	FALSE	FALSE	FALSE	TRUE	TRUE	FALSE	FALSE	FALSE	FALSE	FALSE	FALSE	FALSE	FALSE
YNR023W	FALSE	0.0186915	0.0100098	0.0798312	0.060358	0.0909845	0.0848346	0.0760356	0.00452471	0.0145538	0.0449615	0.0431747	0.0605834	0.0435068	0.0689676	0.0388689	0.0495618	FALSE	FALSE	FALSE	FALSE	FALSE	FALSE	FALSE	FALSE	FALSE	FALSE	FALSE	FALSE	FALSE	FALSE	FALSE	FALSE
YAL016W	TRUE	0.0120846	0.018011	0.0307774	0.0200668	0.0343812	0.0413817	0.0216667	0.00705806	0.00829493	0.0287184	0.00117521	0.00249028	0.00512464	0.0255265	0.0163183	0.00827357	FALSE	FALSE	FALSE	FALSE	FALSE	FALSE	FALSE	FALSE	FALSE	FALSE	FALSE	FALSE	FALSE	FALSE	FALSE	FALSE
YJL200C	FALSE	0.0740922	0.0523353	0.0723482	0.0807421	0.0991761	0.098354	0.0564338	0.00160993	0.0109688	0.0123889	0.0410487	0.0593766	0.0920681	0.0903952	0.0950126	0.131162	FALSE	FALSE	FALSE	FALSE	FALSE	FALSE	FALSE	FALSE	FALSE	FALSE	FALSE	FALSE	FALSE	FALSE	FALSE	FALSE
YFL058W	FALSE	0.257609	0.283801	0.143778	0.323262	0.138014	0.238045	0.134657	0.0418649	0.123061	0.498346	0.161532	0.240601	0.122389	0.0211252	0.101672	0.0712815	TRUE	TRUE	FALSE	TRUE	FALSE	FALSE	FALSE	FALSE	FALSE	TRUE	FALSE	FALSE	FALSE	FALSE	FALSE	FALSE
YNL080C	FALSE	0.0285768	0.00169808	0.00204852	0.0615121	0.0671591	0.063864	0.0502349	0.0199783	0.017177	0.0446093	0.023573	0.0490883	0.0574708	0.029635	0.0430838	0.019457	FALSE	FALSE	FALSE	FALSE	FALSE	FALSE	FALSE	FALSE	FALSE	FALSE	FALSE	FALSE	FALSE	FALSE	FALSE	FALSE
YGR278W	FALSE	0.0384448	0.0584373	0.0780611	0.0144953	0.0137197	0.0113286	0.0426958	0.0547948	0.0279741	0.0845058	0.00583633	0.0010212	0.0107031	0.0147932	0.00968706	0.0745935	FALSE	FALSE	FALSE	FALSE	FALSE	FALSE	FALSE	FALSE	FALSE	FALSE	FALSE	FALSE	FALSE	FALSE	FALSE	FALSE
YFR001W	FALSE	0.0148822	0.0395955	0.0520981	0.0824205	0.051702	0.0113705	0.0140656	0.116667	0.0773112	0.0524031	0.058219	0.0586328	0.0393225	0.0203283	0.0449427	0.0165841	FALSE	FALSE	FALSE	FALSE	FALSE	FALSE	FALSE	FALSE	FALSE	FALSE	FALSE	FALSE	FALSE	FALSE	FALSE	FALSE
YOL038W	FALSE	0.00424161	0.0387768	0.0856913	0.148588	0.0795357	0.0553696	0.0104468	0.00901047	0.0023857	0.0466827	0.0755778	0.0593329	0.0568313	0.0591604	0.0606894	0.0541704	FALSE	FALSE	FALSE	FALSE	FALSE	FALSE	FALSE	FALSE	FALSE	FALSE	FALSE	FALSE	FALSE	FALSE	FALSE	FALSE
YNR010W	FALSE	0.00136359	0.0180798	0.0221549	0.00354466	0.0348996	0.00205328	0.0553036	0.0539869	0.0698294	0.023653	0.0485666	0.0265649	0.00549351	0.0258753	0.0354234	0.0381564	FALSE	FALSE	FALSE	FALSE	FALSE	FALSE	FALSE	FALSE	FALSE	FALSE	FALSE	FALSE	FALSE	FALSE	FALSE	FALSE
YDR045C	FALSE	0.0121221	0.0400047	0.0228738	0.0552745	0.0308855	0.0178878	0.0249758	0.0326776	0.0314591	0.0385605	0.0179016	0.0315921	0.0244455	0.014868	0.0171648	0.0235834	FALSE	FALSE	FALSE	FALSE	FALSE	FALSE	FALSE	FALSE	FALSE	FALSE	FALSE	FALSE	FALSE	FALSE	FALSE	FALSE
YLR330W	FALSE	0.0242989	0.0184402	0.00498896	0.0146224	0.0516198	0.0796787	0.0541336	0.0224627	0.0156957	0.00386273	0.0318345	0.00361217	0.0355422	0.0214656	0.0371574	0.0102245	FALSE	FALSE	FALSE	FALSE	FALSE	FALSE	FALSE	FALSE	FALSE	FALSE	FALSE	FALSE	FALSE	FALSE	FALSE	FALSE
YBR046C	FALSE	0.0757427	0.0485131	0.120624	0.0488993	0.0490744	0.0287776	0.0350179	0.043851	0.0698494	0.101339	0.0638665	0.0350772	0.027801	0.0264853	0.0432109	0.0275439	FALSE	FALSE	FALSE	FALSE	FALSE	FALSE	FALSE	FALSE	FALSE	FALSE	FALSE	FALSE	FALSE	FALSE	FALSE	FALSE
YCR024C-B	FALSE	0.149268	0.18188	0.300642	0.151852	0.0347883	0.095127	0.181062	0.325203	0.322107	0.26807	0.178343	0.0614037	0.0281351	0.0866779	0.118606	0.0991424	FALSE	FALSE	TRUE	FALSE	FALSE	FALSE	FALSE	TRUE	TRUE	TRUE	FALSE	FALSE	FALSE	FALSE	FALSE	FALSE
YER091C	FALSE	0.057382	0.0669088	0.275621	0.425707	0.391219	0.297757	0.124552	0.0547623	0.203123	0.30653	0.200532	0.186146	0.218565	0.202014	0.185764	0.0925223	FALSE	FALSE	TRUE	TRUE	TRUE	TRUE	FALSE	FALSE	FALSE	TRUE	FALSE	FALSE	FALSE	FALSE	FALSE	FALSE
YFL028C	FALSE	0.0662353	0.0259654	0.0272226	0.0658492	0.0592371	0.0298384	0.0192438	0.0674025	0.0418184	0.0259923	0.0153742	0.0298818	0.0150701	0.0164271	0.0308685	0.0128246	FALSE	FALSE	FALSE	FALSE	FALSE	FALSE	FALSE	FALSE	FALSE	FALSE	FALSE	FALSE	FALSE	FALSE	FALSE	FALSE
YGR078C	FALSE	0.0452433	0.0696718	0.0537397	0.0447483	0.0197314	0.0434264	0.0487651	0.0762953	0.0864976	0.137604	0.0141095	0.0401876	0.0164574	0.0711868	0.0462988	0.0176503	FALSE	FALSE	FALSE	FALSE	FALSE	FALSE	FALSE	FALSE	FALSE	FALSE	FALSE	FALSE	FALSE	FALSE	FALSE	FALSE
YDL241W	FALSE	0.186697	0.0535907	0.0582173	0.122329	0.0307438	0.102879	0.033616	0.0933673	0.0344718	0.106803	0.125872	0.0122839	0.0192833	0.0893148	0.020471	0.00582424	FALSE	FALSE	FALSE	FALSE	FALSE	FALSE	FALSE	FALSE	FALSE	FALSE	FALSE	FALSE	FALSE	FALSE	FALSE	FALSE
YDR261C	FALSE	0.00985809	0.088653	0.174347	0.185863	0.143763	0.0823082	0.0232366	0.078576	0.0905147	0.15875	0.142908	0.131671	0.114533	0.0633371	0.00640217	0.0459959	FALSE	FALSE	FALSE	FALSE	FALSE	FALSE	FALSE	FALSE	FALSE	FALSE	FALSE	FALSE	FALSE	FALSE	FALSE	FALSE
YNL126W	FALSE	0.105076	0.188019	0.259099	0.302071	0.260171	0.211747	0.0969132	0.0486123	0.183786	0.303509	0.361662	0.305843	0.205586	0.0851187	0.0464956	0.0201712	FALSE	FALSE	TRUE	TRUE	TRUE	FALSE	FALSE	FALSE	FALSE	TRUE	TRUE	TRUE	FALSE	FALSE	FALSE	FALSE
YCL016C	FALSE	0.0384005	0.0124973	0.035309	0.0315103	0.0412241	0.0709699	0.0375117	0.0625443	0.0517816	0.0335917	0.0129122	0.0210979	0.0559531	0.0894833	0.0376911	0.010175	FALSE	FALSE	FALSE	FALSE	FALSE	FALSE	FALSE	FALSE	FALSE	FALSE	FALSE	FALSE	FALSE	FALSE	FALSE	FALSE
YLR210W	TRUE	0.105166	0.012791	0.125675	0.15632	0.183101	0.182255	0.169732	0.0657271	0.0181372	0.142642	0.124902	0.143209	0.164093	0.0455695	0.0731926	0.0205544	FALSE	FALSE	FALSE	FALSE	FALSE	FALSE	FALSE	FALSE	FALSE	FALSE	FALSE	FALSE	FALSE	FALSE	FALSE	FALSE
YBR195C	FALSE	0.132523	0.106198	0.0739235	0.0639702	0.0230256	0.00230664	0.0371645	0.0946013	0.138059	0.0367823	0.100114	0.0125914	0.0379736	0.0312374	0.0309843	0.0207593	FALSE	FALSE	FALSE	FALSE	FALSE	FALSE	FALSE	FALSE	FALSE	FALSE	FALSE	FALSE	FALSE	FALSE	FALSE	FALSE
YHL008C	FALSE	0.0469745	0.0809083	0.0869641	0.046484	0.0194809	0.00893104	0.0158646	0.0717796	0.0762794	0.0813628	0.0557036	0.0359261	0.00570566	0.00381702	0.00178279	0.0362306	FALSE	FALSE	FALSE	FALSE	FALSE	FALSE	FALSE	FALSE	FALSE	FALSE	FALSE	FALSE	FALSE	FALSE	FALSE	FALSE
YJR127C	FALSE	0.0734645	0.0313783	0.0718677	0.165711	0.139185	0.0866349	0.00932925	0.0777856	0.0524019	0.114101	0.0951414	0.0746856	0.0328685	0.0233527	0.0253366	0.0227774	FALSE	FALSE	FALSE	FALSE	FALSE	FALSE	FALSE	FALSE	FALSE	FALSE	FALSE	FALSE	FALSE	FALSE	FALSE	FALSE
YLR340W	FALSE	0.0477699	0.020166	0.0327366	0.0096328	0.0172421	0.00876426	0.00947864	0.0623244	0.0506337	0.0157885	0.00546243	0.00377019	0.00955233	0.0275173	0.00468029	0.0416436	FALSE	FALSE	FALSE	FALSE	FALSE	FALSE	FALSE	FALSE	FALSE	FALSE	FALSE	FALSE	FALSE	FALSE	FALSE	FALSE
YML058W	FALSE	0.102485	0.168904	0.239244	0.051549	0.147684	0.21953	0.275508	0.349751	0.24831	0.180521	0.0593624	0.0834728	0.154536	0.18149	0.165008	0.134452	FALSE	FALSE	FALSE	FALSE	FALSE	FALSE	TRUE	TRUE	FALSE	FALSE	FALSE	FALSE	FALSE	FALSE	FALSE	FALSE
YML048W	FALSE	0.0589909	0.0748998	0.0883658	0.0508605	0.00613796	0.0227396	0.0326257	0.0738865	0.0757578	0.0777763	0.0251187	0.0132786	0.011394	0.00300706	0.0273256	0.00282891	FALSE	FALSE	FALSE	FALSE	FALSE	FALSE	FALSE	FALSE	FALSE	FALSE	FALSE	FALSE	FALSE	FALSE	FALSE	FALSE
YOL137W	FALSE	0.00895768	0.0480066	0.0978441	0.0727849	0.0525653	0.0137311	0.00594733	0.00268896	0.0610343	0.0499952	0.155469	0.011047	0.0357889	0.0375984	0.00940354	0.0393103	FALSE	FALSE	FALSE	FALSE	FALSE	FALSE	FALSE	FALSE	FALSE	FALSE	FALSE	FALSE	FALSE	FALSE	FALSE	FALSE
YLR047C	FALSE	0.0451609	0.0367309	0.0166323	0.082188	0.104077	0.102041	0.0771744	0.0686136	0.0272744	0.0531746	0.0950559	0.0793544	0.0700488	0.00957094	0.017517	0.0258529	FALSE	FALSE	FALSE	FALSE	FALSE	FALSE	FALSE	FALSE	FALSE	FALSE	FALSE	FALSE	FALSE	FALSE	FALSE	FALSE
YLR389C	FALSE	0.0968791	0.0846025	0.113942	0.0350259	0.00521431	0.0323352	0.0413013	0.0894081	0.0584113	0.0737743	0.0367611	0.0620298	0.0405487	0.00821652	0.00224955	0.00701324	FALSE	FALSE	FALSE	FALSE	FALSE	FALSE	FALSE	FALSE	FALSE	FALSE	FALSE	FALSE	FALSE	FALSE	FALSE	FALSE
YGR184C	FALSE	0.00117191	0.0446712	0.0783232	0.0488797	0.00349839	0.0314265	0.00139817	0.0132445	0.0258446	0.00930377	0.0244819	0.0309145	0.036278	0.0303444	0.016265	0.0364603	FALSE	FALSE	FALSE	FALSE	FALSE	FALSE	FALSE	FALSE	FALSE	FALSE	FALSE	FALSE	FALSE	FALSE	FALSE	FALSE
YMR004W	FALSE	0.0406909	0.0103902	0.0423782	0.00150344	0.0663511	0.0397206	0.0295332	0.0111105	0.0360296	0.0138424	0.0271527	0.018122	0.0448816	0.0315304	0.0362786	0.0171763	FALSE	FALSE	FALSE	FALSE	FALSE	FALSE	FALSE	FALSE	FALSE	FALSE	FALSE	FALSE	FALSE	FALSE	FALSE	FALSE
YLR019W	FALSE	0.0376823	0.0147608	0.0135415	0.0296468	0.0306951	0.0765446	0.0300159	0.0254697	0.00405422	0.0471543	0.0473614	0.0167819	0.0178803	0.0109132	0.0185128	0.00796472	FALSE	FALSE	FALSE	FALSE	FALSE	FALSE	FALSE	FALSE	FALSE	FALSE	FALSE	FALSE	FALSE	FALSE	FALSE	FALSE
YER180C	FALSE	0.0103632	0.0292183	0.071872	0.0139311	0.0312438	0.0515403	0.0542213	0.0885126	0.0899489	0.0566839	0.0368544	0.0208838	0.00192214	0.100429	0.110223	0.00576916	FALSE	FALSE	FALSE	FALSE	FALSE	FALSE	FALSE	FALSE	FALSE	FALSE	FALSE	FALSE	FALSE	FALSE	FALSE	FALSE
YMR094W	FALSE	0.38328	0.287823	0.329995	0.284854	0.18839	0.102286	0.0819278	0.168609	0.251261	0.296703	0.295255	0.172434	0.194977	0.0871446	0.106028	0.143896	TRUE	TRUE	TRUE	TRUE	FALSE	FALSE	FALSE	FALSE	TRUE	TRUE	TRUE	FALSE	FALSE	FALSE	FALSE	FALSE
YOR327C	FALSE	0.0823939	0.0891926	0.12466	0.0796718	0.0141389	0.0155434	0.0412057	0.0487184	0.144765	0.159711	0.13268	0.0180999	0.00557725	0.00376447	0.0277122	0.029206	FALSE	FALSE	FALSE	FALSE	FALSE	FALSE	FALSE	FALSE	FALSE	FALSE	FALSE	FALSE	FALSE	FALSE	FALSE	FALSE
YOR019W	FALSE	0.0653581	0.0105159	0.0155921	0.0255537	0.0375768	0.0278494	0.0403911	0.0689669	0.0060942	0.00143128	0.0192694	0.00562289	0.0178237	0.015651	0.0494152	0.00208169	FALSE	FALSE	FALSE	FALSE	FALSE	FALSE	FALSE	FALSE	FALSE	FALSE	FALSE	FALSE	FALSE	FALSE	FALSE	FALSE
YLR422W	FALSE	0.0164131	0.00764078	0.0241561	0.0193226	0.0204886	0.0375703	0.0091858	0.0207885	0.0515601	0.00275839	0.0298562	0.0131037	0.0354346	0.0075808	0.00648797	0.0208512	FALSE	FALSE	FALSE	FALSE	FALSE	FALSE	FALSE	FALSE	FALSE	FALSE	FALSE	FALSE	FALSE	FALSE	FALSE	FALSE
YNL128W	FALSE	0.208176	0.132732	0.163275	0.0864398	0.0435547	0.0803796	0.0186881	0.118288	0.0829481	0.218105	0.131353	0.0917231	0.0572421	0.0377438	0.0705891	0.0209722	FALSE	FALSE	FALSE	FALSE	FALSE	FALSE	FALSE	FALSE	FALSE	FALSE	FALSE	FALSE	FALSE	FALSE	FALSE	FALSE
YCR009C	FALSE	0.0330578	0.0436056	0.0216654	0.016247	0.0149382	0.0207984	0.00205912	0.0151097	0.00205166	0.0109908	0.0417381	0.0305902	0.0374234	0.00388992	0.0179591	0.0633962	FALSE	FALSE	FALSE	FALSE	FALSE	FALSE	FALSE	FALSE	FALSE	FALSE	FALSE	FALSE	FALSE	FALSE	FALSE	FALSE
YJR042W	FALSE	0.0137327	0.00528006	0.0278222	0.0118823	0.044456	0.0734891	0.036208	0.00319758	0.00824339	0.0221252	0.0084657	0.00271254	0.0326072	0.00932683	0.0270781	0.0335167	FALSE	FALSE	FALSE	FALSE	FALSE	FALSE	FALSE	FALSE	FALSE	FALSE	FALSE	FALSE	FALSE	FALSE	FALSE	FALSE
YJR101W	FALSE	0.0144064	0.0161563	0.019124	0.00636384	0.0609294	0.054299	0.0215506	0.0430471	0.00469533	0.0181455	0.0418827	0.0582447	0.0362635	0.00334306	0.0276249	0.0136691	FALSE	FALSE	FALSE	FALSE	FALSE	FALSE	FALSE	FALSE	FALSE	FALSE	FALSE	FALSE	FALSE	FALSE	FALSE	FALSE
YCL046W	FALSE	0.00564397	0.0112066	0.0215169	0.0412509	0.100863	0.0485932	0.0193674	0.00879173	0.082354	0.04514	0.127122	0.0366856	0.0141338	0.0150784	0.0179967	0.0208061	FALSE	FALSE	FALSE	FALSE	FALSE	FALSE	FALSE	FALSE	FALSE	FALSE	FALSE	FALSE	FALSE	FALSE	FALSE	FALSE
YOR214C	FALSE	0.176663	0.0217751	0.121047	0.120279	0.116151	0.0191607	0.0322213	0.00299003	0.0374088	0.0876542	0.111787	0.125455	0.0082006	0.0473464	0.0105209	0.0514623	FALSE	FALSE	FALSE	FALSE	FALSE	FALSE	FALSE	FALSE	FALSE	FALSE	FALSE	FALSE	FALSE	FALSE	FALSE	FALSE
YMR303C	FALSE	0.190959	0.136662	0.143838	0.0719984	0.0406972	0.0827212	0.00852185	0.0734309	0.103112	0.100907	0.10387	0.043254	0.0496779	0.0928974	0.0482118	0.0132627	FALSE	FALSE	FALSE	FALSE	FALSE	FALSE	FALSE	FALSE	FALSE	FALSE	FALSE	FALSE	FALSE	FALSE	FALSE	FALSE
YOL014W	FALSE	0.00430691	0.0627383	0.122852	0.047523	0.0460687	0.0179315	0.0622039	0.10218	0.0907921	0.102953	0.0868396	0.023059	0.005087	0.0211627	0.0309823	0.0216344	FALSE	FALSE	FALSE	FALSE	FALSE	FALSE	FALSE	FALSE	FALSE	FALSE	FALSE	FALSE	FALSE	FALSE	FALSE	FALSE
YLR271W	FALSE	0.05072	0.00397218	0.00133364	0.0850744	0.0638157	0.0337099	0.041943	0.054243	0.0224929	0.0973724	0.0719638	0.00645991	0.079294	0.0176594	0.00526644	0.0568003	FALSE	FALSE	FALSE	FALSE	FALSE	FALSE	FALSE	FALSE	FALSE	FALSE	FALSE	FALSE	FALSE	FALSE	FALSE	FALSE
YIR006C	FALSE	0.0463419	0.0415189	0.104861	0.0574093	0.0343529	0.0215083	0.0468996	0.0575647	0.00446555	0.0683232	0.018589	0.0399481	0.0549761	0.0443339	0.025535	0.0442607	FALSE	FALSE	FALSE	FALSE	FALSE	FALSE	FALSE	FALSE	FALSE	FALSE	FALSE	FALSE	FALSE	FALSE	FALSE	FALSE
YOR027W	FALSE	0.0225446	0.0163635	0.0152609	0.00960723	0.00806343	0.0155216	0.00355659	0.00297085	0.00558006	0.0285435	0.0132421	0.00522654	0.00939438	0.00193938	0.00558631	0.00772795	FALSE	FALSE	FALSE	FALSE	FALSE	FALSE	FALSE	FALSE	FALSE	FALSE	FALSE	FALSE	FALSE	FALSE	FALSE	FALSE
YDR349C	FALSE	0.0128034	0.0166242	0.00124327	0.0395512	0.0663383	0.0272958	0.0246891	0.0306807	0.022261	0.0305396	0.0139743	0.0417387	0.0555944	0.015476	0.00641945	0.0100509	FALSE	FALSE	FALSE	FALSE	FALSE	FALSE	FALSE	FALSE	FALSE	FALSE	FALSE	FALSE	FALSE	FALSE	FALSE	FALSE
YIL090W	FALSE	0.0247505	0.00494381	0.0412359	0.0101895	0.0320158	0.0143127	0.0255713	0.0196275	0.0606641	0.0524585	0.010894	0.017743	0.0190512	0.0295337	0.0183349	0.0578105	FALSE	FALSE	FALSE	FALSE	FALSE	FALSE	FALSE	FALSE	FALSE	FALSE	FALSE	FALSE	FALSE	FALSE	FALSE	FALSE
YER161C	FALSE	0.0131907	0.033932	0.0696552	0.0360632	0.0124069	0.00595542	0.00818175	0.0498955	0.0594043	0.029654	0.0363745	0.0976232	0.0710113	0.0251274	0.0404901	0.0105217	FALSE	FALSE	FALSE	FALSE	FALSE	FALSE	FALSE	FALSE	FALSE	FALSE	FALSE	FALSE	FALSE	FALSE	FALSE	FALSE
YGL035C	FALSE	0.259498	0.189427	0.222029	0.134258	0.058387	0.0372394	0.0361834	0.0807489	0.0830813	0.143345	0.129774	0.179824	0.170304	0.0913134	0.0403878	0.00106991	TRUE	FALSE	FALSE	FALSE	FALSE	FALSE	FALSE	FALSE	FALSE	FALSE	FALSE	FALSE	FALSE	FALSE	FALSE	FALSE
YBR276C	FALSE	0.101504	0.0891834	0.0680218	0.0191197	0.0184579	0.0623199	0.0825871	0.109409	0.0899143	0.0881516	0.0702337	0.0142984	0.0363509	0.0339309	0.0380606	0.0326064	FALSE	FALSE	FALSE	FALSE	FALSE	FALSE	FALSE	FALSE	FALSE	FALSE	FALSE	FALSE	FALSE	FALSE	FALSE	FALSE
YML133C	FALSE	0.223714	0.240754	0.0725367	0.201244	0.192491	0.10695	0.38661	0.215282	0.167109	0.11548	0.0765473	0.239162	0.130423	0.0263105	0.161481	0.0691378	FALSE	FALSE	FALSE	FALSE	FALSE	FALSE	TRUE	FALSE	FALSE	FALSE	FALSE	FALSE	FALSE	FALSE	FALSE	FALSE
YIL088C	FALSE	0.0620191	0.0456004	0.0097872	0.032764	0.0619141	0.10595	0.0729497	0.0352544	0.0456863	0.0160974	0.0202594	0.0348373	0.0157584	0.0730875	0.0810521	0.0249237	FALSE	FALSE	FALSE	FALSE	FALSE	FALSE	FALSE	FALSE	FALSE	FALSE	FALSE	FALSE	FALSE	FALSE	FALSE	FALSE
YBR005W	FALSE	0.0120787	0.0496508	0.0618938	0.029747	0.00210005	0.0590251	0.0144907	0.0472189	0.0352921	0.138257	0.00696753	0.0147595	0.0030604	0.0412282	0.0103163	0.0371586	FALSE	FALSE	FALSE	FALSE	FALSE	FALSE	FALSE	FALSE	FALSE	FALSE	FALSE	FALSE	FALSE	FALSE	FALSE	FALSE
YDR056C	FALSE	0.040747	0.0378594	0.0249868	0.0110351	0.0109003	0.0119984	0.0146446	0.0342186	0.0253662	0.0316108	0.025807	0.0378601	0.00837761	0.00846433	0.024317	0.00214941	FALSE	FALSE	FALSE	FALSE	FALSE	FALSE	FALSE	FALSE	FALSE	FALSE	FALSE	FALSE	FALSE	FALSE	FALSE	FALSE
YGR286C	FALSE	0.0915381	0.0876606	0.137529	0.00635148	0.0837442	0.130258	0.168996	0.222092	0.186772	0.163935	0.0033219	0.0211336	0.0797508	0.121529	0.136797	0.069264	FALSE	FALSE	FALSE	FALSE	FALSE	FALSE	FALSE	FALSE	FALSE	FALSE	FALSE	FALSE	FALSE	FALSE	FALSE	FALSE
YLR206W	FALSE	0.0598764	0.0409197	0.00868402	0.0723354	0.00305675	0.0605886	0.0444584	0.0304854	0.0198913	0.0293391	0.0254882	0.0199836	0.0341032	0.0242578	0.0268705	0.00473531	FALSE	FALSE	FALSE	FALSE	FALSE	FALSE	FALSE	FALSE	FALSE	FALSE	FALSE	FALSE	FALSE	FALSE	FALSE	FALSE
YOR226C	FALSE	0.0921593	0.024176	0.0168514	0.0723913	0.0942636	0.0781233	0.117174	0.0783308	0.0215389	0.0623709	0.0400819	0.0340046	0.0629765	0.0708311	0.0594478	0.0611481	FALSE	FALSE	FALSE	FALSE	FALSE	FALSE	FALSE	FALSE	FALSE	FALSE	FALSE	FALSE	FALSE	FALSE	FALSE	FALSE
YER126C	FALSE	0.0339663	0.019832	0.00931671	0.0259554	0.0241714	0.0315284	0.0346251	0.0406733	0.0188382	0.0356485	0.0210704	0.0249785	0.0160924	0.0485706	0.0399128	0.0578751	FALSE	FALSE	FALSE	FALSE	FALSE	FALSE	FALSE	FALSE	FALSE	FALSE	FALSE	FALSE	FALSE	FALSE	FALSE	FALSE
YDL200C	FALSE	0.0338735	0.0162041	0.0359712	0.0351205	0.029861	0.0150227	0.0122214	0.00386073	0.0823643	0.0284903	0.0279759	0.0710455	0.0167235	0.0544463	0.0246891	0.0765726	FALSE	FALSE	FALSE	FALSE	FALSE	FALSE	FALSE	FALSE	FALSE	FALSE	FALSE	FALSE	FALSE	FALSE	FALSE	FALSE
YBL044W	FALSE	0.393612	0.35043	0.307232	0.0163939	0.372355	0.379946	0.356148	0.438629	0.343684	0.0766495	0.0221282	0.0044542	0.191408	0.210187	0.121993	0.434288	TRUE	TRUE	TRUE	FALSE	TRUE	TRUE	TRUE	TRUE	TRUE	FALSE	FALSE	FALSE	FALSE	FALSE	FALSE	TRUE
YGR120C	FALSE	0.0693355	0.0205317	0.0313469	0.039647	0.0479589	0.087273	0.0390992	0.0341232	0.0515061	0.0357876	0.0451207	0.0207984	0.00609058	0.0251284	0.065304	0.00931126	FALSE	FALSE	FALSE	FALSE	FALSE	FALSE	FALSE	FALSE	FALSE	FALSE	FALSE	FALSE	FALSE	FALSE	FALSE	FALSE
YKR072C	FALSE	0.0261534	0.0206347	0.0143334	0.0474566	0.00283792	0.0409641	0.0326678	0.0817276	0.0430844	0.0955495	0.0412469	0.0172473	0.0205995	0.0506477	0.0556904	0.0734661	FALSE	FALSE	FALSE	FALSE	FALSE	FALSE	FALSE	FALSE	FALSE	FALSE	FALSE	FALSE	FALSE	FALSE	FALSE	FALSE
YCR091W	FALSE	0.162442	0.165343	0.14076	0.133709	0.15683	0.0939938	0.0553076	0.0525824	0.166702	0.142825	0.0913924	0.0647034	0.190642	0.136095	0.0998762	0.0537909	FALSE	FALSE	FALSE	FALSE	FALSE	FALSE	FALSE	FALSE	FALSE	FALSE	FALSE	FALSE	FALSE	FALSE	FALSE	FALSE
YIL055C	FALSE	0.133656	0.107648	0.114431	0.0195828	0.012725	0.0150576	0.0267854	0.0139174	0.0251259	0.119136	0.0550791	0.015106	0.0612094	0.092289	0.0551712	0.0176066	FALSE	FALSE	FALSE	FALSE	FALSE	FALSE	FALSE	FALSE	FALSE	FALSE	FALSE	FALSE	FALSE	FALSE	FALSE	FALSE
YNR021W	FALSE	0.0182875	0.0284939	0.0177876	0.0175338	0.00637615	0.0486348	0.0211218	0.00214044	0.0165594	0.0315414	0.0542315	0.0256132	0.0241379	0.0296422	0.00799811	0.0188971	FALSE	FALSE	FALSE	FALSE	FALSE	FALSE	FALSE	FALSE	FALSE	FALSE	FALSE	FALSE	FALSE	FALSE	FALSE	FALSE
YLL015W	FALSE	0.0223941	0.00833392	0.0414044	0.0387074	0.0501269	0.0227268	0.0415847	0.0192436	0.0117173	0.00887519	0.0403286	0.00421683	0.0237945	0.046886	0.0135942	0.00283554	FALSE	FALSE	FALSE	FALSE	FALSE	FALSE	FALSE	FALSE	FALSE	FALSE	FALSE	FALSE	FALSE	FALSE	FALSE	FALSE
YMR201C	FALSE	0.00895401	0.0582484	0.0863402	0.0956177	0.029192	0.00866075	0.00201535	0.0504569	0.101879	0.0964865	0.0164166	0.0849895	0.0406675	0.00496882	0.0312785	0.00286129	FALSE	FALSE	FALSE	FALSE	FALSE	FALSE	FALSE	FALSE	FALSE	FALSE	FALSE	FALSE	FALSE	FALSE	FALSE	FALSE
YMR256C	FALSE	0.00745471	0.0620215	0.183466	0.0755288	0.155777	0.089432	0.014081	0.0115297	0.0658396	0.164878	0.115176	0.075853	0.0977168	0.0789585	0.103742	0.0189748	FALSE	FALSE	FALSE	FALSE	FALSE	FALSE	FALSE	FALSE	FALSE	FALSE	FALSE	FALSE	FALSE	FALSE	FALSE	FALSE
YOL096C	FALSE	0.0713749	0.0540961	0.0871242	0.143326	0.143204	0.0514686	0.0311142	0.0717719	0.054495	0.06947	0.0553064	0.0673037	0.0749256	0.0796107	0.0674579	0.0663373	FALSE	FALSE	FALSE	FALSE	FALSE	FALSE	FALSE	FALSE	FALSE	FALSE	FALSE	FALSE	FALSE	FALSE	FALSE	FALSE
YPL192C	FALSE	0.194582	0.0832084	0.0632876	0.00264117	0.00313463	0.0996236	0.0577103	0.00390628	0.0202821	0.0133199	0.0897368	0.0308992	0.0450739	0.0177341	0.0118318	0.0268797	FALSE	FALSE	FALSE	FALSE	FALSE	FALSE	FALSE	FALSE	FALSE	FALSE	FALSE	FALSE	FALSE	FALSE	FALSE	FALSE
YFR052W	FALSE	0.00302701	0.0296361	0.0970182	0.0790198	0.0978763	0.0413938	0.0238134	0.0159267	0.0393178	0.0310171	0.075341	0.0327241	0.0464779	0.0365907	0.0297948	0.0229352	FALSE	FALSE	FALSE	FALSE	FALSE	FALSE	FALSE	FALSE	FALSE	FALSE	FALSE	FALSE	FALSE	FALSE	FALSE	FALSE
YOR315W	FALSE	0.59454	0.465458	0.444093	0.120758	0.0931145	0.290721	0.36533	0.463882	0.460191	0.396919	0.20479	0.114924	0.0531702	0.0346677	0.131579	0.106806	TRUE	TRUE	TRUE	FALSE	FALSE	TRUE	TRUE	TRUE	TRUE	TRUE	FALSE	FALSE	FALSE	FALSE	FALSE	FALSE
YHR035W	FALSE	0.0378424	0.032548	0.104737	0.0563184	0.0395921	0.114757	0.0434715	0.0259369	0.047265	0.081657	0.0310335	0.0819237	0.0733434	0.0309421	0.122511	0.0543877	FALSE	FALSE	FALSE	FALSE	FALSE	FALSE	FALSE	FALSE	FALSE	FALSE	FALSE	FALSE	FALSE	FALSE	FALSE	FALSE
YBL102W	FALSE	0.00991507	0.0274356	0.0739774	0.0979713	0.0843695	0.0826041	0.039651	0.00163983	0.0226921	0.0202121	0.0839992	0.0165366	0.0508886	0.0755827	0.0697772	0.0557459	FALSE	FALSE	FALSE	FALSE	FALSE	FALSE	FALSE	FALSE	FALSE	FALSE	FALSE	FALSE	FALSE	FALSE	FALSE	FALSE
YKR017C	FALSE	0.0644597	0.0745192	0.123674	0.0616202	0.0579594	0.00265943	0.0266915	0.0343108	0.034863	0.00893203	0.0580726	0.0490145	0.0884285	0.0123775	0.0611686	0.0387665	FALSE	FALSE	FALSE	FALSE	FALSE	FALSE	FALSE	FALSE	FALSE	FALSE	FALSE	FALSE	FALSE	FALSE	FALSE	FALSE
YHR077C	FALSE	0.0122677	0.00418327	0.00167882	0.0118438	0.035003	0.0541927	0.0600236	0.0320721	0.0346379	0.00350368	0.0582309	0.015972	0.0101291	0.0291401	0.0569706	0.0422857	FALSE	FALSE	FALSE	FALSE	FALSE	FALSE	FALSE	FALSE	FALSE	FALSE	FALSE	FALSE	FALSE	FALSE	FALSE	FALSE
YDR205W	FALSE	0.0390502	0.0209639	0.0258731	0.0241664	0.0149382	0.0197429	0.0080937	0.0400892	0.044626	0.0382234	0.0589437	0.0100845	0.00429192	0.0270076	0.0152077	0.0368292	FALSE	FALSE	FALSE	FALSE	FALSE	FALSE	FALSE	FALSE	FALSE	FALSE	FALSE	FALSE	FALSE	FALSE	FALSE	FALSE
YKL204W	FALSE	0.118486	0.0901088	0.0603093	0.00882977	0.0143364	0.0559963	0.0429428	0.0466724	0.0141162	0.0822362	0.0416381	0.0475465	0.0341127	0.00654737	0.0125686	0.00546072	FALSE	FALSE	FALSE	FALSE	FALSE	FALSE	FALSE	FALSE	FALSE	FALSE	FALSE	FALSE	FALSE	FALSE	FALSE	FALSE
YFL010C	FALSE	0.04621	0.0419218	0.0929632	0.00154137	0.0133262	0.0365823	0.0356169	0.0978811	0.11934	0.0385106	0.0189514	0.032833	0.0227162	0.0416415	0.0589267	0.0493951	FALSE	FALSE	FALSE	FALSE	FALSE	FALSE	FALSE	FALSE	FALSE	FALSE	FALSE	FALSE	FALSE	FALSE	FALSE	FALSE
YPR127W	FALSE	0.0318353	0.0245646	0.0140767	0.018304	0.00892363	0.0428201	0.0509587	0.028471	0.00996615	0.00607769	0.0100973	0.0517665	0.0222069	0.0254203	0.00407999	0.0384655	FALSE	FALSE	FALSE	FALSE	FALSE	FALSE	FALSE	FALSE	FALSE	FALSE	FALSE	FALSE	FALSE	FALSE	FALSE	FALSE
YJR120W	FALSE	0.0801798	0.0103037	0.0553818	0.224279	0.0720011	0.223685	0.173401	0.133606	0.182347	0.288249	0.263032	0.0584173	0.101001	0.0239493	0.0807914	0.178278	FALSE	FALSE	FALSE	FALSE	FALSE	FALSE	FALSE	FALSE	FALSE	TRUE	TRUE	FALSE	FALSE	FALSE	FALSE	FALSE
YAR030C	FALSE	0.0265445	0.0695554	0.043872	0.0894016	0.13378	0.0584455	0.0314688	0.00106189	0.0302392	0.0279695	0.130788	0.114425	0.0414397	0.0757131	0.0484902	0.0336092	FALSE	FALSE	FALSE	FALSE	FALSE	FALSE	FALSE	FALSE	FALSE	FALSE	FALSE	FALSE	FALSE	FALSE	FALSE	FALSE
YEL005C	FALSE	0.0509867	0.0473687	0.0175567	0.0258999	0.0281544	0.0804989	0.0267807	0.0117588	0.0262479	0.046742	0.0523938	0.0154544	0.00729043	0.0556552	0.0729535	0.0863958	FALSE	FALSE	FALSE	FALSE	FALSE	FALSE	FALSE	FALSE	FALSE	FALSE	FALSE	FALSE	FALSE	FALSE	FALSE	FALSE
YBL080C	FALSE	0.0329396	0.0190029	0.00497533	0.00521589	0.0407901	0.0490104	0.0631589	0.0322848	0.0432346	0.00668361	0.0154257	0.00580591	0.065324	0.00761057	0.0113377	0.0742628	FALSE	FALSE	FALSE	FALSE	FALSE	FALSE	FALSE	FALSE	FALSE	FALSE	FALSE	FALSE	FALSE	FALSE	FALSE	FALSE
YOR020C	FALSE	0.0793632	0.066837	0.057348	0.0245151	0.132924	0.123038	0.104125	0.116534	0.15194	0.0576014	0.00508911	0.0421697	0.0769084	0.0894263	0.094338	0.0702146	FALSE	FALSE	FALSE	FALSE	FALSE	FALSE	FALSE	FALSE	FALSE	FALSE	FALSE	FALSE	FALSE	FALSE	FALSE	FALSE
YJL123C	FALSE	0.0724705	0.0200384	0.00623691	0.114213	0.123038	0.155486	0.132361	0.129185	0.0242192	0.0273815	0.0564623	0.124155	0.124376	0.0633809	0.0580529	0.0360106	FALSE	FALSE	FALSE	FALSE	FALSE	FALSE	FALSE	FALSE	FALSE	FALSE	FALSE	FALSE	FALSE	FALSE	FALSE	FALSE
YMR064W	FALSE	0.0165352	0.0221907	0.0177534	0.0129519	0.0283549	0.0491455	0.0467752	0.0283069	0.0500835	0.0110331	0.0162398	0.0440804	0.0483188	0.0139635	0.00717475	0.0352285	FALSE	FALSE	FALSE	FALSE	FALSE	FALSE	FALSE	FALSE	FALSE	FALSE	FALSE	FALSE	FALSE	FALSE	FALSE	FALSE
YGR087C	FALSE	0.151662	0.0410864	0.0788694	0.191315	0.15709	0.11647	0.138577	0.246895	0.0853869	0.0914901	0.137957	0.10141	0.147413	0.0461805	0.0145378	0.0992571	FALSE	FALSE	FALSE	FALSE	FALSE	FALSE	FALSE	FALSE	FALSE	FALSE	FALSE	FALSE	FALSE	FALSE	FALSE	FALSE
YIL037C	FALSE	0.0671195	0.0632652	0.101827	0.112111	0.026238	0.0219994	0.0460399	0.00890134	0.00608303	0.153517	0.0353336	0.068962	0.0400194	0.0242559	0.0248667	0.0100295	FALSE	FALSE	FALSE	FALSE	FALSE	FALSE	FALSE	FALSE	FALSE	FALSE	FALSE	FALSE	FALSE	FALSE	FALSE	FALSE
YER167W	FALSE	0.0128324	0.0197894	0.0590789	0.0562291	0.0276758	0.00670622	0.0193368	0.0239081	0.0246256	0.0477131	0.037636	0.0455208	0.0257953	0.0423551	0.025165	0.0102958	FALSE	FALSE	FALSE	FALSE	FALSE	FALSE	FALSE	FALSE	FALSE	FALSE	FALSE	FALSE	FALSE	FALSE	FALSE	FALSE
YHR017W	FALSE	0.0839209	0.0531028	0.0106687	0.0294831	0.035557	0.0290378	0.0155696	0.0237202	0.0220395	0.0126772	0.0862676	0.0216749	0.00645095	0.0173687	0.0165275	0.00695042	FALSE	FALSE	FALSE	FALSE	FALSE	FALSE	FALSE	FALSE	FALSE	FALSE	FALSE	FALSE	FALSE	FALSE	FALSE	FALSE
YNL159C	FALSE	0.111061	0.119975	0.129755	0.0600667	0.0119438	0.00135887	0.0781181	0.0764094	0.096945	0.0958658	0.0137781	0.0721322	0.0295931	0.0190631	0.0370576	0.0161894	FALSE	FALSE	FALSE	FALSE	FALSE	FALSE	FALSE	FALSE	FALSE	FALSE	FALSE	FALSE	FALSE	FALSE	FALSE	FALSE
YNL273W	FALSE	0.295565	0.206194	0.149202	0.0206996	0.13601	0.221812	0.324458	0.377475	0.242456	0.173525	0.0147625	0.0810572	0.111903	0.118528	0.0989087	0.0826174	TRUE	FALSE	FALSE	FALSE	FALSE	FALSE	TRUE	TRUE	FALSE	FALSE	FALSE	FALSE	FALSE	FALSE	FALSE	FALSE
YFR033C	FALSE	0.0149095	0.0588398	0.110074	0.162597	0.0791995	0.0413103	0.00100635	0.0607608	0.0535244	0.093614	0.0605377	0.115776	0.0644557	0.00331388	0.0102897	0.0137516	FALSE	FALSE	FALSE	FALSE	FALSE	FALSE	FALSE	FALSE	FALSE	FALSE	FALSE	FALSE	FALSE	FALSE	FALSE	FALSE
YPR128C	FALSE	0.0360875	0.0118502	0.0250729	0.0122553	0.0206836	0.0265431	0.0290284	0.0819234	0.0337464	0.0117491	0.00599037	0.0367275	0.0411829	0.0429758	0.0419501	0.035258	FALSE	FALSE	FALSE	FALSE	FALSE	FALSE	FALSE	FALSE	FALSE	FALSE	FALSE	FALSE	FALSE	FALSE	FALSE	FALSE
YHR134W	FALSE	0.00991415	0.0297464	0.00955422	0.0284131	0.015109	0.00930277	0.00161542	0.0898682	0.0251059	0.0133559	0.0540085	0.0143054	0.0323935	0.00648895	0.0126505	0.0164878	FALSE	FALSE	FALSE	FALSE	FALSE	FALSE	FALSE	FALSE	FALSE	FALSE	FALSE	FALSE	FALSE	FALSE	FALSE	FALSE
YMR140W	FALSE	0.0426759	0.0750872	0.167692	0.105522	0.00672503	0.0329699	0.0283916	0.0167247	0.0368469	0.0823745	0.0931512	0.0544183	0.0352758	0.039606	0.00589365	0.0137438	FALSE	FALSE	FALSE	FALSE	FALSE	FALSE	FALSE	FALSE	FALSE	FALSE	FALSE	FALSE	FALSE	FALSE	FALSE	FALSE
YPR113W	FALSE	0.129241	0.104833	0.137335	0.0802868	0.0746663	0.0595058	0.0116073	0.040936	0.0124306	0.0786718	0.185994	0.039574	0.0650637	0.114213	0.0919742	0.00911977	FALSE	FALSE	FALSE	FALSE	FALSE	FALSE	FALSE	FALSE	FALSE	FALSE	FALSE	FALSE	FALSE	FALSE	FALSE	FALSE
YPL012W	FALSE	0.105255	0.09943	0.125413	0.093088	0.108148	0.10468	0.0630815	0.0279091	0.040032	0.0867105	0.0867616	0.0644509	0.120341	0.0940315	0.083534	0.121645	FALSE	FALSE	FALSE	FALSE	FALSE	FALSE	FALSE	FALSE	FALSE	FALSE	FALSE	FALSE	FALSE	FALSE	FALSE	FALSE
YNL329C	FALSE	0.0765471	0.0466185	0.0332255	0.0443443	0.0428168	0.0402456	0.0579368	0.0543381	0.0346955	0.0426693	0.0765766	0.072202	0.0608375	0.0710804	0.0525273	0.013736	FALSE	FALSE	FALSE	FALSE	FALSE	FALSE	FALSE	FALSE	FALSE	FALSE	FALSE	FALSE	FALSE	FALSE	FALSE	FALSE
YPR174C	FALSE	0.247369	0.195855	0.174746	0.00239083	0.138315	0.227608	0.275088	0.334632	0.283964	0.227558	0.00886551	0.0584778	0.126508	0.177139	0.127169	0.0357868	FALSE	FALSE	FALSE	FALSE	FALSE	FALSE	TRUE	TRUE	TRUE	FALSE	FALSE	FALSE	FALSE	FALSE	FALSE	FALSE
YDR440W	FALSE	0.134052	0.138961	0.0999475	0.0198063	0.0276365	0.0525062	0.0999975	0.157964	0.138466	0.125384	0.0420676	0.0169783	0.0396722	0.0650082	0.0546004	0.0240727	FALSE	FALSE	FALSE	FALSE	FALSE	FALSE	FALSE	FALSE	FALSE	FALSE	FALSE	FALSE	FALSE	FALSE	FALSE	FALSE
YOR360C	FALSE	0.00482998	0.0156903	0.0188417	0.0120802	0.00153335	0.009241	0.00678591	0.0218991	0.00375424	0.00860362	0.0198746	0.00756708	0.00703431	0.0418092	0.0108139	0.00417788	FALSE	FALSE	FALSE	FALSE	FALSE	FALSE	FALSE	FALSE	FALSE	FALSE	FALSE	FALSE	FALSE	FALSE	FALSE	FALSE
YLR370C	FALSE	0.0757582	0.0341863	0.00491646	0.0298018	0.0575592	0.0732869	0.0528545	0.0042435	0.00338098	0.0214631	0.00862032	0.0256491	0.00290354	0.0315363	0.0141498	0.0420931	FALSE	FALSE	FALSE	FALSE	FALSE	FALSE	FALSE	FALSE	FALSE	FALSE	FALSE	FALSE	FALSE	FALSE	FALSE	FALSE
YGL126W	FALSE	0.0956984	0.105042	0.0793987	0.0813411	0.0104789	0.0292237	0.0601357	0.075655	0.13054	0.0652759	0.0924473	0.0517072	0.0409082	0.0178478	0.0475823	0.0158581	FALSE	FALSE	FALSE	FALSE	FALSE	FALSE	FALSE	FALSE	FALSE	FALSE	FALSE	FALSE	FALSE	FALSE	FALSE	FALSE
YKR092C	FALSE	0.00317225	0.0124409	0.0662203	0.0328722	0.0913106	0.0992552	0.0873571	0.0660314	0.043842	0.0081492	0.0601589	0.0326594	0.0698028	0.0876992	0.0910823	0.0891072	FALSE	FALSE	FALSE	FALSE	FALSE	FALSE	FALSE	FALSE	FALSE	FALSE	FALSE	FALSE	FALSE	FALSE	FALSE	FALSE
YLR263W	FALSE	0.0531838	0.0312359	0.0202293	0.0133011	0.0449415	0.0759795	0.0396627	0.0390189	0.0592238	0.00780896	0.0589981	0.00905196	0.0393335	0.0585613	0.0176729	0.0530163	FALSE	FALSE	FALSE	FALSE	FALSE	FALSE	FALSE	FALSE	FALSE	FALSE	FALSE	FALSE	FALSE	FALSE	FALSE	FALSE
YBR115C	FALSE	0.119269	0.0379347	0.00172831	0.00123637	0.0277018	0.0348147	0.0556884	0.0727198	0.0592949	0.0339885	0.0134174	0.0183761	0.0150111	0.00935244	0.00432793	0.00218413	FALSE	FALSE	FALSE	FALSE	FALSE	FALSE	FALSE	FALSE	FALSE	FALSE	FALSE	FALSE	FALSE	FALSE	FALSE	FALSE
YMR226C	FALSE	0.15414	0.0982899	0.0686387	0.00382129	0.0707183	0.104864	0.0996387	0.119448	0.0923933	0.0575893	0.0347863	0.00924457	0.0218837	0.0335344	0.0340665	0.0330246	FALSE	FALSE	FALSE	FALSE	FALSE	FALSE	FALSE	FALSE	FALSE	FALSE	FALSE	FALSE	FALSE	FALSE	FALSE	FALSE
YPR122W	FALSE	0.0720251	0.0743456	0.0489871	0.00904908	0.0118814	0.0283143	0.005614	0.0110724	0.0285358	0.0381985	0.0206195	0.0197858	0.0180641	0.019699	0.027536	0.0623852	FALSE	FALSE	FALSE	FALSE	FALSE	FALSE	FALSE	FALSE	FALSE	FALSE	FALSE	FALSE	FALSE	FALSE	FALSE	FALSE
YOR013W	FALSE	0.00559553	0.0296642	0.0577574	0.0480586	0.075361	0.0940757	0.00851056	0.0577513	0.123247	0.0103775	0.250135	0.0691958	0.0125193	0.0795324	0.136637	0.0683497	FALSE	FALSE	FALSE	FALSE	FALSE	FALSE	FALSE	FALSE	FALSE	FALSE	TRUE	FALSE	FALSE	FALSE	FALSE	FALSE
YER015W	FALSE	0.0265005	0.0399905	0.104697	0.0551604	0.0212489	0.0538351	0.0353383	0.0285395	0.0433674	0.0591027	0.0217121	0.00681239	0.029262	0.132954	0.00977241	0.0200505	FALSE	FALSE	FALSE	FALSE	FALSE	FALSE	FALSE	FALSE	FALSE	FALSE	FALSE	FALSE	FALSE	FALSE	FALSE	FALSE
YOR160W	FALSE	0.0203493	0.00201027	0.0224168	0.00524713	0.00985768	0.0455261	0.057757	0.0585126	0.0254565	0.0102759	0.0178255	0.0336776	0.036206	0.00541872	0.0320408	0.0293556	FALSE	FALSE	FALSE	FALSE	FALSE	FALSE	FALSE	FALSE	FALSE	FALSE	FALSE	FALSE	FALSE	FALSE	FALSE	FALSE
YBL018C	FALSE	0.0384752	0.0306695	0.0275092	0.0500886	0.016022	0.0761913	0.0515158	0.0801181	0.145176	0.075242	0.118306	0.00789445	0.00698477	0.0546399	0.0342853	0.0179525	FALSE	FALSE	FALSE	FALSE	FALSE	FALSE	FALSE	FALSE	FALSE	FALSE	FALSE	FALSE	FALSE	FALSE	FALSE	FALSE
YNL012W	FALSE	0.00374501	0.0288771	0.0070454	0.0465126	0.0199955	0.0384662	0.00700304	0.0352736	0.00555487	0.0284491	0.0304343	0.0349797	0.0335259	0.0124587	0.0421422	0.0224843	FALSE	FALSE	FALSE	FALSE	FALSE	FALSE	FALSE	FALSE	FALSE	FALSE	FALSE	FALSE	FALSE	FALSE	FALSE	FALSE
Q0275	FALSE	0.357235	0.102526	0.729349	0.48737	0.459588	0.179292	0.0291667	0.239436	0.152489	0.276043	0.222202	0.11879	0.0253438	0.0224497	0.230096	0.0598537	TRUE	FALSE	TRUE	TRUE	TRUE	FALSE	FALSE	FALSE	FALSE	TRUE	FALSE	FALSE	FALSE	FALSE	FALSE	FALSE
YDR507C	TRUE	0.305127	0.202337	0.16124	0.0814365	0.0419279	0.0629194	0.200676	0.392438	0.422698	0.303538	0.144582	0.0551893	0.0989029	0.0676976	0.057714	0.0940847	TRUE	FALSE	FALSE	FALSE	FALSE	FALSE	FALSE	TRUE	TRUE	TRUE	FALSE	FALSE	FALSE	FALSE	FALSE	FALSE
YML032C	FALSE	0.0103752	0.00266324	0.00739689	0.00189793	0.0454873	0.0404995	0.0465809	0.00569747	0.0374035	0.0496211	0.014378	0.0319952	0.00859965	0.00666326	0.0147387	0.00243741	FALSE	FALSE	FALSE	FALSE	FALSE	FALSE	FALSE	FALSE	FALSE	FALSE	FALSE	FALSE	FALSE	FALSE	FALSE	FALSE
YDR330W	FALSE	0.108326	0.116265	0.12072	0.126152	0.0435589	0.0377653	0.0519717	0.00728264	0.058167	0.113925	0.0557543	0.0783513	0.0680377	0.0431398	0.0545316	0.01534	FALSE	FALSE	FALSE	FALSE	FALSE	FALSE	FALSE	FALSE	FALSE	FALSE	FALSE	FALSE	FALSE	FALSE	FALSE	FALSE
YDR510W	FALSE	0.0110632	0.00504323	0.0537785	0.0299352	0.0461272	0.042832	0.0526422	0.0751759	0.0378359	0.0558742	0.00973575	0.043805	0.0591071	0.108276	0.0566706	0.0466207	FALSE	FALSE	FALSE	FALSE	FALSE	FALSE	FALSE	FALSE	FALSE	FALSE	FALSE	FALSE	FALSE	FALSE	FALSE	FALSE
YKL094W	FALSE	0.0686689	0.0292775	0.0269368	0.0465286	0.0691142	0.0714763	0.056669	0.0242031	0.0298163	0.0147107	0.00746265	0.014366	0.0387189	0.0505658	0.0237058	0.0403498	FALSE	FALSE	FALSE	FALSE	FALSE	FALSE	FALSE	FALSE	FALSE	FALSE	FALSE	FALSE	FALSE	FALSE	FALSE	FALSE
YLR149C	FALSE	0.0335268	0.0779174	0.108429	0.0980418	0.0491306	0.107429	0.080021	0.00838967	0.0264411	0.0178559	0.0538619	0.0017894	0.1082	0.141269	0.0945053	0.12476	FALSE	FALSE	FALSE	FALSE	FALSE	FALSE	FALSE	FALSE	FALSE	FALSE	FALSE	FALSE	FALSE	FALSE	FALSE	FALSE
YML067C	FALSE	0.00196152	0.0115839	0.0512091	0.00423478	0.0202323	0.00152355	0.0191677	0.024636	0.0120111	0.0327396	0.00546065	0.0227541	0.0030625	0.0117437	0.0167794	0.0170309	FALSE	FALSE	FALSE	FALSE	FALSE	FALSE	FALSE	FALSE	FALSE	FALSE	FALSE	FALSE	FALSE	FALSE	FALSE	FALSE
YGL249W	FALSE	0.087473	0.0394344	0.0115261	0.0370238	0.0193513	0.0182919	0.0017251	0.0263017	0.0130499	0.0636125	0.0443297	0.0377726	0.0635087	0.00157618	0.0150024	0.0173883	FALSE	FALSE	FALSE	FALSE	FALSE	FALSE	FALSE	FALSE	FALSE	FALSE	FALSE	FALSE	FALSE	FALSE	FALSE	FALSE
YPL058C	FALSE	0.02974	0.00778628	0.00223304	0.0332174	0.0225719	0.00398339	0.0377027	0.0168481	0.00783375	0.0305078	0.00301894	0.0187483	0.0156318	0.0247216	0.0225391	0.031811	FALSE	FALSE	FALSE	FALSE	FALSE	FALSE	FALSE	FALSE	FALSE	FALSE	FALSE	FALSE	FALSE	FALSE	FALSE	FALSE
YHR005C-A	FALSE	0.0616331	0.0399947	0.0192019	0.0283968	0.0476154	0.0218444	0.0283505	0.0186902	0.014223	0.0781536	0.0477481	0.034394	0.0433627	0.0578536	0.0256778	0.0128027	FALSE	FALSE	FALSE	FALSE	FALSE	FALSE	FALSE	FALSE	FALSE	FALSE	FALSE	FALSE	FALSE	FALSE	FALSE	FALSE
YIR013C	FALSE	0.0960062	0.174511	0.111292	0.0611083	0.19313	0.171312	0.119176	0.18116	0.0827864	0.0889098	0.0434508	0.0566103	0.0832293	0.0585665	0.0574385	0.0332305	FALSE	FALSE	FALSE	FALSE	FALSE	FALSE	FALSE	FALSE	FALSE	FALSE	FALSE	FALSE	FALSE	FALSE	FALSE	FALSE
YKL110C	FALSE	0.0244259	0.0239602	0.0340416	0.0212815	0.0150416	0.0287274	0.0339549	0.0136376	0.0165088	0.0309947	0.0271161	0.0353163	0.0122217	0.0020083	0.0299172	0.02503	FALSE	FALSE	FALSE	FALSE	FALSE	FALSE	FALSE	FALSE	FALSE	FALSE	FALSE	FALSE	FALSE	FALSE	FALSE	FALSE
YBL022C	FALSE	0.0169766	0.0743367	0.109376	0.123093	0.0418479	0.0305944	0.0324237	0.025	0.0412864	0.0608304	0.0349818	0.0859719	0.0668083	0.0511427	0.0545079	0.0598091	FALSE	FALSE	FALSE	FALSE	FALSE	FALSE	FALSE	FALSE	FALSE	FALSE	FALSE	FALSE	FALSE	FALSE	FALSE	FALSE
YPL034W	FALSE	0.0877716	0.0485542	0.0247211	0.0236046	0.0689927	0.00743782	0.0133863	0.0147579	0.0172789	0.0176077	0.0292924	0.0332672	0.0665304	0.00524271	0.0196742	0.026287	FALSE	FALSE	FALSE	FALSE	FALSE	FALSE	FALSE	FALSE	FALSE	FALSE	FALSE	FALSE	FALSE	FALSE	FALSE	FALSE
YOL127W	FALSE	0.0281582	0.0131634	0.0475827	0.0321694	0.0860814	0.0830373	0.0439903	0.0207382	0.0118208	0.0175017	0.0984347	0.0412529	0.0565532	0.0724908	0.0613072	0.0175049	FALSE	FALSE	FALSE	FALSE	FALSE	FALSE	FALSE	FALSE	FALSE	FALSE	FALSE	FALSE	FALSE	FALSE	FALSE	FALSE
YNR074C	FALSE	0.0721043	0.0193324	0.0759323	0.102073	0.0985265	0.0806121	0.0213461	0.0169391	0.0294102	0.0336824	0.0114643	0.0748137	0.0631662	0.00345546	0.007323	0.0449441	FALSE	FALSE	FALSE	FALSE	FALSE	FALSE	FALSE	FALSE	FALSE	FALSE	FALSE	FALSE	FALSE	FALSE	FALSE	FALSE
YNL127W	FALSE	0.0435015	0.00327158	0.0155766	0.0153302	0.0660837	0.0785358	0.130327	0.0411659	0.0435382	0.0343477	0.0400853	0.0629404	0.0518284	0.0646925	0.0127648	0.0393799	FALSE	FALSE	FALSE	FALSE	FALSE	FALSE	FALSE	FALSE	FALSE	FALSE	FALSE	FALSE	FALSE	FALSE	FALSE	FALSE
YLR413W	FALSE	0.412162	0.225949	0.14548	0.0326782	0.0103537	0.00250212	0.0365492	0.0973621	0.14712	0.194783	0.191476	0.131282	0.104272	0.0758763	0.0724674	0.0202081	TRUE	FALSE	FALSE	FALSE	FALSE	FALSE	FALSE	FALSE	FALSE	FALSE	FALSE	FALSE	FALSE	FALSE	FALSE	FALSE
YHR072W-A	FALSE	0.013172	0.0329685	0.0359692	0.0405619	0.0225619	0.00770838	0.0335203	0.0822803	0.0188304	0.0564673	0.130123	0.0340963	0.0277961	0.0904807	0.0455195	0.0577061	FALSE	FALSE	FALSE	FALSE	FALSE	FALSE	FALSE	FALSE	FALSE	FALSE	FALSE	FALSE	FALSE	FALSE	FALSE	FALSE
YJL190C	FALSE	0.0472135	0.0212339	0.0603001	0.0263052	0.0905145	0.0677141	0.033935	0.0271167	0.0315166	0.0227845	0.121783	0.0193236	0.0390004	0.0894346	0.0746246	0.0448372	FALSE	FALSE	FALSE	FALSE	FALSE	FALSE	FALSE	FALSE	FALSE	FALSE	FALSE	FALSE	FALSE	FALSE	FALSE	FALSE
YLL018C	FALSE	0.0477836	0.045436	0.0579583	0.0309925	0.00561844	0.0043323	0.0114722	0.0530217	0.0392316	0.0295263	0.0485496	0.0171241	0.0101757	0.0366646	0.00681734	0.0206646	FALSE	FALSE	FALSE	FALSE	FALSE	FALSE	FALSE	FALSE	FALSE	FALSE	FALSE	FALSE	FALSE	FALSE	FALSE	FALSE
YER087C-B	FALSE	0.0523132	0.101692	0.125981	0.134423	0.0421027	0.0109343	0.0114068	0.0546894	0.15281	0.0795635	0.166367	0.0647841	0.0508016	0.0652996	0.0216768	0.0621262	FALSE	FALSE	FALSE	FALSE	FALSE	FALSE	FALSE	FALSE	FALSE	FALSE	FALSE	FALSE	FALSE	FALSE	FALSE	FALSE
YNL041C	FALSE	0.0325784	0.00849467	0.00359426	0.0449556	0.0223188	0.0672661	0.0273767	0.0510623	0.00630856	0.0559865	0.0375051	0.0116702	0.0111497	0.00292089	0.0457368	0.00606072	FALSE	FALSE	FALSE	FALSE	FALSE	FALSE	FALSE	FALSE	FALSE	FALSE	FALSE	FALSE	FALSE	FALSE	FALSE	FALSE
YGL095C	FALSE	0.0422003	0.058476	0.103811	0.0701456	0.057944	0.0425464	0.00799441	0.00947074	0.0132219	0.0184857	0.102108	0.0517382	0.0529019	0.0875021	0.0370111	0.00241102	FALSE	FALSE	FALSE	FALSE	FALSE	FALSE	FALSE	FALSE	FALSE	FALSE	FALSE	FALSE	FALSE	FALSE	FALSE	FALSE
YDR035W	FALSE	0.19784	0.0914509	0.0558984	0.00390425	0.0176557	0.00399747	0.00915068	0.00995367	0.0121456	0.0521545	0.0584579	0.023863	0.0418993	0.0796529	0.0842484	0.0331987	FALSE	FALSE	FALSE	FALSE	FALSE	FALSE	FALSE	FALSE	FALSE	FALSE	FALSE	FALSE	FALSE	FALSE	FALSE	FALSE
YHL034C	FALSE	0.0775441	0.0500331	0.047002	0.0611855	0.0564456	0.0723385	0.0586863	0.0500566	0.0395602	0.046426	0.0501311	0.0445668	0.0517854	0.0249018	0.00266882	0.061563	FALSE	FALSE	FALSE	FALSE	FALSE	FALSE	FALSE	FALSE	FALSE	FALSE	FALSE	FALSE	FALSE	FALSE	FALSE	FALSE
YER022W	FALSE	0.070478	0.0285216	0.0429091	0.0164375	0.0290609	0.0116626	0.010499	0.0188185	0.03253	0.0251963	0.0608428	0.0344681	0.00738307	0.047554	0.0209989	0.02103	FALSE	FALSE	FALSE	FALSE	FALSE	FALSE	FALSE	FALSE	FALSE	FALSE	FALSE	FALSE	FALSE	FALSE	FALSE	FALSE
YBR298C	FALSE	0.0669022	0.1152	0.270657	0.247441	0.133098	0.0557576	0.0596718	0.125008	0.163217	0.14337	0.104069	0.0733174	0.125126	0.108405	0.0599263	0.00762896	FALSE	FALSE	TRUE	FALSE	FALSE	FALSE	FALSE	FALSE	FALSE	FALSE	FALSE	FALSE	FALSE	FALSE	FALSE	FALSE
YDR307W	FALSE	0.156752	0.134699	0.111543	0.0522682	0.00382529	0.110594	0.109746	0.142295	0.12389	0.117271	0.0276333	0.0171206	0.00793672	0.0185186	0.0266958	0.00402285	FALSE	FALSE	FALSE	FALSE	FALSE	FALSE	FALSE	FALSE	FALSE	FALSE	FALSE	FALSE	FALSE	FALSE	FALSE	FALSE
YLR337C	FALSE	0.0212043	0.0630925	0.124543	0.0354154	0.00655982	0.0495896	0.0520092	0.036481	0.0182557	0.0749099	0.0335941	0.00656711	0.0212425	0.0305437	0.0167998	0.048604	FALSE	FALSE	FALSE	FALSE	FALSE	FALSE	FALSE	FALSE	FALSE	FALSE	FALSE	FALSE	FALSE	FALSE	FALSE	FALSE
YDL036C	FALSE	0.00837364	0.022711	0.0200268	0.0174093	0.0057817	0.0187153	0.0159702	0.00450894	0.0356871	0.051969	0.0828676	0.0145281	0.0164557	0.037691	0.0281717	0.0296324	FALSE	FALSE	FALSE	FALSE	FALSE	FALSE	FALSE	FALSE	FALSE	FALSE	FALSE	FALSE	FALSE	FALSE	FALSE	FALSE
YAL014C	FALSE	0.0360409	0.060245	0.0821084	0.0205818	0.0257851	0.026039	0.00184114	0.0643862	0.0214487	0.0318749	0.0309624	0.0781381	0.0811242	0.035804	0.033719	0.0351837	FALSE	FALSE	FALSE	FALSE	FALSE	FALSE	FALSE	FALSE	FALSE	FALSE	FALSE	FALSE	FALSE	FALSE	FALSE	FALSE
YDR111C	FALSE	0.0438747	0.00218134	0.0497954	0.0230909	0.0408514	0.0155106	0.0173041	0.0189434	0.0581652	0.0134029	0.00918776	0.0225475	0.0373045	0.0473915	0.024467	0.00750874	FALSE	FALSE	FALSE	FALSE	FALSE	FALSE	FALSE	FALSE	FALSE	FALSE	FALSE	FALSE	FALSE	FALSE	FALSE	FALSE
YBL066C	FALSE	0.0511603	0.00965003	0.0853327	0.0029003	0.0571756	0.0958221	0.0793771	0.0554082	0.087539	0.039425	0.0247882	0.0271468	0.0427424	0.0648932	0.0646697	0.0235392	FALSE	FALSE	FALSE	FALSE	FALSE	FALSE	FALSE	FALSE	FALSE	FALSE	FALSE	FALSE	FALSE	FALSE	FALSE	FALSE
YHR211W	FALSE	0.0696723	0.0806338	0.040785	0.0147975	0.0382484	0.0417076	0.0431804	0.0781533	0.0426704	0.0642072	0.0980204	0.0331928	0.00236237	0.0282818	0.0338984	0.0155647	FALSE	FALSE	FALSE	FALSE	FALSE	FALSE	FALSE	FALSE	FALSE	FALSE	FALSE	FALSE	FALSE	FALSE	FALSE	FALSE
YEL007W	FALSE	0.0630729	0.0275508	0.0116902	0.0717281	0.0586979	0.0373926	0.00934304	0.0656869	0.0490541	0.0197311	0.0172449	0.0266175	0.00576021	0.0189453	0.0320408	0.0301019	FALSE	FALSE	FALSE	FALSE	FALSE	FALSE	FALSE	FALSE	FALSE	FALSE	FALSE	FALSE	FALSE	FALSE	FALSE	FALSE
YML073C	FALSE	0.0104764	0.0252612	0.0274497	0.0335799	0.0114728	0.0110202	0.0294126	0.028395	0.00135804	0.00659095	0.0542078	0.0131969	0.0120773	0.0679303	0.0241596	0.0347827	FALSE	FALSE	FALSE	FALSE	FALSE	FALSE	FALSE	FALSE	FALSE	FALSE	FALSE	FALSE	FALSE	FALSE	FALSE	FALSE
YGL230C	FALSE	0.0606779	0.0428308	0.198088	0.255801	0.0547457	0.118203	0.0193841	0.174184	0.166562	0.194936	0.206586	0.0652817	0.15205	0.028633	0.09257	0.0798354	FALSE	FALSE	FALSE	TRUE	FALSE	FALSE	FALSE	FALSE	FALSE	FALSE	FALSE	FALSE	FALSE	FALSE	FALSE	FALSE
YBR066C	FALSE	0.0879307	0.0592713	0.0298476	0.0971042	0.0718732	0.0779061	0.0753094	0.00217132	0.0498474	0.171811	0.142399	0.0968428	0.0154705	0.014396	0.0533717	0.00290817	FALSE	FALSE	FALSE	FALSE	FALSE	FALSE	FALSE	FALSE	FALSE	FALSE	FALSE	FALSE	FALSE	FALSE	FALSE	FALSE
YOR139C	FALSE	0.101645	0.0566486	0.113372	0.0417173	0.0430378	0.105922	0.122385	0.0818457	0.0186777	0.154767	0.111156	0.0704005	0.0485775	0.0808434	0.0659624	0.0139147	FALSE	FALSE	FALSE	FALSE	FALSE	FALSE	FALSE	FALSE	FALSE	FALSE	FALSE	FALSE	FALSE	FALSE	FALSE	FALSE
YLR117C	FALSE	0.00477594	0.036955	0.0297694	0.0168537	0.0603804	0.0544567	0.0630376	0.0407953	0.0164081	0.0178073	0.0420545	0.00585516	0.00676239	0.0685449	0.0513907	0.0265159	FALSE	FALSE	FALSE	FALSE	FALSE	FALSE	FALSE	FALSE	FALSE	FALSE	FALSE	FALSE	FALSE	FALSE	FALSE	FALSE
YDL086W	FALSE	0.133862	0.104622	0.0720325	0.0396271	0.0851086	0.0872373	0.0473519	0.0266439	0.0203769	0.0212405	0.00904384	0.00471329	0.00641872	0.0423821	0.0363927	0.0272412	FALSE	FALSE	FALSE	FALSE	FALSE	FALSE	FALSE	FALSE	FALSE	FALSE	FALSE	FALSE	FALSE	FALSE	FALSE	FALSE
YKL006W	FALSE	0.0254732	0.0184933	0.0182964	0.0237666	0.0455111	0.0600244	0.00664867	0.0101074	0.107353	0.0399658	0.0126154	0.0591532	0.073694	0.0298636	0.0313968	0.0430724	FALSE	FALSE	FALSE	FALSE	FALSE	FALSE	FALSE	FALSE	FALSE	FALSE	FALSE	FALSE	FALSE	FALSE	FALSE	FALSE
YDR326C	FALSE	0.106365	0.0297752	0.0135696	0.119432	0.150495	0.13364	0.0890532	0.0930364	0.0558435	0.00292401	0.0571649	0.0788721	0.0943813	0.0857108	0.0578149	0.0405969	FALSE	FALSE	FALSE	FALSE	FALSE	FALSE	FALSE	FALSE	FALSE	FALSE	FALSE	FALSE	FALSE	FALSE	FALSE	FALSE
YDR181C	FALSE	0.0191641	0.00172153	0.0325759	0.0568005	0.0674033	0.0410147	0.0133935	0.0549206	0.0945879	0.0525904	0.0612313	0.020076	0.0101005	0.00997397	0.0241956	0.0363999	FALSE	FALSE	FALSE	FALSE	FALSE	FALSE	FALSE	FALSE	FALSE	FALSE	FALSE	FALSE	FALSE	FALSE	FALSE	FALSE
YDR130C	FALSE	0.125727	0.0179482	0.0705328	0.0603526	0.0913302	0.16036	0.119709	0.112742	0.0873343	0.0357684	0.0891885	0.106339	0.0899321	0.105357	0.0433028	0.0372582	FALSE	FALSE	FALSE	FALSE	FALSE	FALSE	FALSE	FALSE	FALSE	FALSE	FALSE	FALSE	FALSE	FALSE	FALSE	FALSE
YCR082W	FALSE	0.0202246	0.0532687	0.122824	0.155072	0.0784924	0.0567799	0.0344098	0.0265264	0.0482482	0.0479564	0.124401	0.0633807	0.082693	0.0406971	0.0313628	0.0190661	FALSE	FALSE	FALSE	FALSE	FALSE	FALSE	FALSE	FALSE	FALSE	FALSE	FALSE	FALSE	FALSE	FALSE	FALSE	FALSE
YNR026C	FALSE	0.0689801	0.0526424	0.0252919	0.00641958	0.00675328	0.00703698	0.0532275	0.0696541	0.0396625	0.0248414	0.0324801	0.00579632	0.00812068	0.0178656	0.0036269	0.0583043	FALSE	FALSE	FALSE	FALSE	FALSE	FALSE	FALSE	FALSE	FALSE	FALSE	FALSE	FALSE	FALSE	FALSE	FALSE	FALSE
YDR422C	FALSE	0.0325388	0.0246145	0.00198738	0.018819	0.0625805	0.0527016	0.0485946	0.0172167	0.0167319	0.00532792	0.0353865	0.0164781	0.0049975	0.00205037	0.024234	0.0181741	FALSE	FALSE	FALSE	FALSE	FALSE	FALSE	FALSE	FALSE	FALSE	FALSE	FALSE	FALSE	FALSE	FALSE	FALSE	FALSE
YOR388C	FALSE	0.0499535	0.240171	0.151163	0.207761	0.0533349	0.165797	0.193973	0.0395368	0.0939899	0.177955	0.171137	0.111948	0.152067	0.184215	0.035796	0.193755	FALSE	FALSE	FALSE	FALSE	FALSE	FALSE	FALSE	FALSE	FALSE	FALSE	FALSE	FALSE	FALSE	FALSE	FALSE	FALSE
YBR229C	FALSE	0.0472009	0.0748297	0.0726427	0.0437783	0.0371591	0.0282279	0.017587	0.030248	0.0562344	0.0552433	0.0250499	0.0581551	0.0487897	0.0310402	0.0271122	0.0295355	FALSE	FALSE	FALSE	FALSE	FALSE	FALSE	FALSE	FALSE	FALSE	FALSE	FALSE	FALSE	FALSE	FALSE	FALSE	FALSE
YLR074C	FALSE	0.0214238	0.00683939	0.00402072	0.0216357	0.00639679	0.026664	0.00788155	0.0761144	0.0198801	0.0492455	0.0487533	0.0590459	0.0267714	0.0445949	0.0637657	0.0618347	FALSE	FALSE	FALSE	FALSE	FALSE	FALSE	FALSE	FALSE	FALSE	FALSE	FALSE	FALSE	FALSE	FALSE	FALSE	FALSE
YLR383W	FALSE	0.302376	0.272449	0.288541	0.140303	0.0653858	0.032232	0.152029	0.296708	0.406189	0.400201	0.237079	0.0841672	0.051786	0.0362924	0.0339333	0.0669425	TRUE	TRUE	TRUE	FALSE	FALSE	FALSE	FALSE	TRUE	TRUE	TRUE	FALSE	FALSE	FALSE	FALSE	FALSE	FALSE
YBL033C	FALSE	0.061653	0.0527271	0.089457	0.0950773	0.0378598	0.0124569	0.0152849	0.109238	0.0625965	0.073436	0.0501602	0.0481796	0.0249226	0.0272713	0.00646794	0.006417	FALSE	FALSE	FALSE	FALSE	FALSE	FALSE	FALSE	FALSE	FALSE	FALSE	FALSE	FALSE	FALSE	FALSE	FALSE	FALSE
YKL089W	FALSE	0.221852	0.196139	0.151791	0.0619462	0.0453121	0.024601	0.111342	0.216186	0.274006	0.302659	0.0734024	0.0333423	0.0154003	0.0276407	0.0209541	0.0353684	FALSE	FALSE	FALSE	FALSE	FALSE	FALSE	FALSE	FALSE	TRUE	TRUE	FALSE	FALSE	FALSE	FALSE	FALSE	FALSE
YOR380W	FALSE	0.0993114	0.0761747	0.040759	0.0730398	0.0623709	0.0810698	0.0391774	0.0330234	0.0366069	0.0335423	0.0415567	0.0660639	0.0294804	0.0195247	0.00156366	0.0416883	FALSE	FALSE	FALSE	FALSE	FALSE	FALSE	FALSE	FALSE	FALSE	FALSE	FALSE	FALSE	FALSE	FALSE	FALSE	FALSE
YGR032W	FALSE	0.0040899	0.00667118	0.0380454	0.0446942	0.0554864	0.0802348	0.102248	0.100934	0.0868601	0.116857	0.0435543	0.0288098	0.100587	0.122984	0.150769	0.137979	FALSE	FALSE	FALSE	FALSE	FALSE	FALSE	FALSE	FALSE	FALSE	FALSE	FALSE	FALSE	FALSE	FALSE	FALSE	FALSE
YER109C	FALSE	0.0204456	0.0441151	0.027429	0.043915	0.0472434	0.0353981	0.0161669	0.0306035	0.0363762	0.0546568	0.0261122	0.0259743	0.0254325	0.0364312	0.0277227	0.00876615	FALSE	FALSE	FALSE	FALSE	FALSE	FALSE	FALSE	FALSE	FALSE	FALSE	FALSE	FALSE	FALSE	FALSE	FALSE	FALSE
YBL004W	FALSE	0.0451594	0.0280853	0.0129079	0.0795429	0.125918	0.106013	0.0564513	0.0493538	0.0282025	0.0556808	0.0428777	0.0353414	0.0799215	0.0884417	0.0634065	0.0650789	FALSE	FALSE	FALSE	FALSE	FALSE	FALSE	FALSE	FALSE	FALSE	FALSE	FALSE	FALSE	FALSE	FALSE	FALSE	FALSE
YGL112C	FALSE	0.031151	0.00312895	0.0232668	0.0731742	0.0820032	0.0986703	0.0745491	0.0291658	0.00592453	0.0943805	0.0508925	0.0682366	0.027502	0.00770687	0.0607317	0.0195774	FALSE	FALSE	FALSE	FALSE	FALSE	FALSE	FALSE	FALSE	FALSE	FALSE	FALSE	FALSE	FALSE	FALSE	FALSE	FALSE
YPR154W	FALSE	0.0615552	0.0499948	0.0048704	0.0457695	0.0619405	0.0696722	0.0412599	0.0539445	0.0137475	0.0672819	0.0693504	0.0611324	0.0304757	0.0202984	0.019728	0.00685907	FALSE	FALSE	FALSE	FALSE	FALSE	FALSE	FALSE	FALSE	FALSE	FALSE	FALSE	FALSE	FALSE	FALSE	FALSE	FALSE
YKL025C	FALSE	0.0683588	0.0432189	0.0413894	0.044449	0.0394562	0.105442	0.0716422	0.0395349	0.0407625	0.0284191	0.0149287	0.052124	0.013843	0.0199767	0.0319078	0.0177174	FALSE	FALSE	FALSE	FALSE	FALSE	FALSE	FALSE	FALSE	FALSE	FALSE	FALSE	FALSE	FALSE	FALSE	FALSE	FALSE
YNL161W	FALSE	0.0694214	0.0427912	0.0254116	0.0217611	0.0594392	0.0798681	0.0659115	0.0583624	0.0254964	0.00112548	0.0118633	0.0101162	0.0359425	0.032251	0.0322082	0.0336332	FALSE	FALSE	FALSE	FALSE	FALSE	FALSE	FALSE	FALSE	FALSE	FALSE	FALSE	FALSE	FALSE	FALSE	FALSE	FALSE
YAL025C	FALSE	0.00733747	0.0195912	0.0311805	0.0326539	0.0198175	0.018662	0.0115351	0.00669002	0.0186436	0.00189183	0.0229779	0.0441166	0.00796111	0.0299083	0.0285011	0.0475141	FALSE	FALSE	FALSE	FALSE	FALSE	FALSE	FALSE	FALSE	FALSE	FALSE	FALSE	FALSE	FALSE	FALSE	FALSE	FALSE
YMR146C	FALSE	0.00925359	0.00861438	0.00177776	0.00466113	0.00740138	0.0235929	0.0143752	0.00388113	0.0177895	0.010782	0.010384	0.00651939	0.00314469	0.00240202	0.00383296	0.011914	FALSE	FALSE	FALSE	FALSE	FALSE	FALSE	FALSE	FALSE	FALSE	FALSE	FALSE	FALSE	FALSE	FALSE	FALSE	FALSE
YHR162W	FALSE	0.155011	0.0579862	0.00375248	0.0572302	0.0876823	0.0647793	0.0400321	0.0324038	0.0317552	0.00655335	0.0327053	0.00552516	0.00210023	0.0148713	0.00614623	0.0106285	FALSE	FALSE	FALSE	FALSE	FALSE	FALSE	FALSE	FALSE	FALSE	FALSE	FALSE	FALSE	FALSE	FALSE	FALSE	FALSE
YGR170W	FALSE	0.0935937	0.0742971	0.0509136	0.00631666	0.034984	0.0253227	0.0196146	0.0695596	0.0452593	0.0400428	0.0389911	0.0371309	0.0152856	0.0108748	0.00272902	0.0150483	FALSE	FALSE	FALSE	FALSE	FALSE	FALSE	FALSE	FALSE	FALSE	FALSE	FALSE	FALSE	FALSE	FALSE	FALSE	FALSE
YGL220W	FALSE	0.0924678	0.066828	0.0814958	0.0087622	0.031395	0.0281826	0.00749377	0.0114934	0.0418512	0.00726478	0.155371	0.0390798	0.0531763	0.126906	0.0494759	0.0549459	FALSE	FALSE	FALSE	FALSE	FALSE	FALSE	FALSE	FALSE	FALSE	FALSE	FALSE	FALSE	FALSE	FALSE	FALSE	FALSE
YLR058C	FALSE	0.275138	0.353154	0.49783	0.445788	0.268809	0.105745	0.038514	0.203914	0.253869	0.290921	0.258638	0.24482	0.240602	0.228042	0.207588	0.155101	TRUE	TRUE	TRUE	TRUE	TRUE	FALSE	FALSE	FALSE	TRUE	TRUE	TRUE	FALSE	FALSE	FALSE	FALSE	FALSE
YER116C	FALSE	0.07434	0.0828503	0.0343312	0.0378587	0.0785376	0.102115	0.0657794	0.0667296	0.0468159	0.0278776	0.0207788	0.0277368	0.0185186	0.0265373	0.0348427	0.0202533	FALSE	FALSE	FALSE	FALSE	FALSE	FALSE	FALSE	FALSE	FALSE	FALSE	FALSE	FALSE	FALSE	FALSE	FALSE	FALSE
YGL174W	FALSE	0.122163	0.0961061	0.0492347	0.00528044	0.050412	0.0434362	0.0572549	0.0293351	0.0145491	0.210528	0.00663303	0.0452794	0.0502993	0.0303683	0.0182059	0.0157369	FALSE	FALSE	FALSE	FALSE	FALSE	FALSE	FALSE	FALSE	FALSE	FALSE	FALSE	FALSE	FALSE	FALSE	FALSE	FALSE
YKR033C	FALSE	0.0641778	0.0435281	0.0312602	0.131782	0.0665783	0.0845192	0.117932	0.116234	0.0718902	0.0758073	0.116692	0.0159466	0.2528	0.134321	0.101661	0.00680604	FALSE	FALSE	FALSE	FALSE	FALSE	FALSE	FALSE	FALSE	FALSE	FALSE	FALSE	FALSE	TRUE	FALSE	FALSE	FALSE
YMR172C-A	FALSE	0.0133408	0.0442313	0.0239144	0.113048	0.00926824	0.010248	0.0463484	0.0345963	0.0498448	0.0791148	0.0163825	0.0636657	0.0311817	0.0130436	0.0314402	0.00752738	FALSE	FALSE	FALSE	FALSE	FALSE	FALSE	FALSE	FALSE	FALSE	FALSE	FALSE	FALSE	FALSE	FALSE	FALSE	FALSE
YLR024C	FALSE	0.0237789	0.0112425	0.0649868	0.0800328	0.014649	0.0343445	0.00649028	0.0529587	0.0274531	0.00134217	0.004243	0.00142907	0.00736225	0.0311085	0.00955188	0.0270277	FALSE	FALSE	FALSE	FALSE	FALSE	FALSE	FALSE	FALSE	FALSE	FALSE	FALSE	FALSE	FALSE	FALSE	FALSE	FALSE
YDL022W	FALSE	0.456966	0.353507	0.364703	0.135885	0.0650472	0.0620017	0.0994592	0.121348	0.175779	0.158569	0.0700058	0.07617	0.12518	0.143478	0.226765	0.316627	TRUE	TRUE	TRUE	FALSE	FALSE	FALSE	FALSE	FALSE	FALSE	FALSE	FALSE	FALSE	FALSE	FALSE	FALSE	TRUE
YER120W	FALSE	0.0473636	0.0251744	0.00265904	0.0769628	0.0856122	0.102231	0.0916094	0.0456339	0.0165786	0.0253203	0.0571246	0.0843305	0.0585455	0.0497889	0.0159658	0.0189324	FALSE	FALSE	FALSE	FALSE	FALSE	FALSE	FALSE	FALSE	FALSE	FALSE	FALSE	FALSE	FALSE	FALSE	FALSE	FALSE
YMR170C	FALSE	0.0479678	0.0103823	0.0650169	0.0480381	0.0152863	0.0392014	0.00949121	0.00275902	0.144986	0.0559286	0.0762062	0.0642276	0.01103	0.0338286	0.0856564	0.120721	FALSE	FALSE	FALSE	FALSE	FALSE	FALSE	FALSE	FALSE	FALSE	FALSE	FALSE	FALSE	FALSE	FALSE	FALSE	FALSE
YNL030W	FALSE	0.0402092	0.213721	0.38768	0.3907	0.215102	0.0958959	0.0338929	0.204549	0.383975	0.466063	0.429763	0.297049	0.158415	0.021212	0.175015	0.187935	FALSE	FALSE	TRUE	TRUE	FALSE	FALSE	FALSE	FALSE	TRUE	TRUE	TRUE	TRUE	FALSE	FALSE	FALSE	FALSE
YNR037C	FALSE	0.0435078	0.0062891	0.0578999	0.161699	0.1118	0.116515	0.00873512	0.0434991	0.026669	0.0833817	0.015223	0.144594	0.135388	0.0201612	0.0350196	0.00282668	FALSE	FALSE	FALSE	FALSE	FALSE	FALSE	FALSE	FALSE	FALSE	FALSE	FALSE	FALSE	FALSE	FALSE	FALSE	FALSE
YHR069C	FALSE	0.00142183	0.041608	0.069185	0.0703414	0.0671211	0.0847122	0.0518001	0.0106316	0.00498209	0.0548626	0.0062954	0.0538321	0.0800074	0.0497008	0.069555	0.0619293	FALSE	FALSE	FALSE	FALSE	FALSE	FALSE	FALSE	FALSE	FALSE	FALSE	FALSE	FALSE	FALSE	FALSE	FALSE	FALSE
YGL124C	FALSE	0.0213171	0.00927741	0.00701663	0.0495425	0.0737404	0.0755967	0.0772893	0.0320693	0.0171586	0.0160432	0.0187326	0.0462342	0.0291018	0.0529683	0.0538527	0.0419611	FALSE	FALSE	FALSE	FALSE	FALSE	FALSE	FALSE	FALSE	FALSE	FALSE	FALSE	FALSE	FALSE	FALSE	FALSE	FALSE
YKL188C	FALSE	0.0181643	0.118584	0.0955533	0.117575	0.0483761	0.0178575	0.0117767	0.059216	0.105966	0.0987342	0.0384309	0.0895511	0.0361921	0.0166002	0.00823104	0.0250834	FALSE	FALSE	FALSE	FALSE	FALSE	FALSE	FALSE	FALSE	FALSE	FALSE	FALSE	FALSE	FALSE	FALSE	FALSE	FALSE
YGR241C	FALSE	0.0949831	0.0508182	0.0163193	0.0200163	0.0306583	0.0634457	0.091816	0.0601919	0.0519284	0.0277064	0.0322185	0.00593402	0.0269529	0.0377219	0.026588	0.0158895	FALSE	FALSE	FALSE	FALSE	FALSE	FALSE	FALSE	FALSE	FALSE	FALSE	FALSE	FALSE	FALSE	FALSE	FALSE	FALSE
YOR145C	FALSE	0.0447218	0.0493457	0.074285	0.0564317	0.0570766	0.0550408	0.0298612	0.0326296	0.00797478	0.0382035	0.0328541	0.0361088	0.0604977	0.085224	0.0680465	0.0595856	FALSE	FALSE	FALSE	FALSE	FALSE	FALSE	FALSE	FALSE	FALSE	FALSE	FALSE	FALSE	FALSE	FALSE	FALSE	FALSE
YPR111W	TRUE	0.0924144	0.0201211	0.0205777	0.0500051	0.131611	0.0958463	0.171412	0.127621	0.083555	0.0638448	0.00533826	0.0932463	0.150503	0.0679311	0.113766	0.0777167	FALSE	FALSE	FALSE	FALSE	FALSE	FALSE	FALSE	FALSE	FALSE	FALSE	FALSE	FALSE	FALSE	FALSE	FALSE	FALSE
YEL042W	FALSE	0.0622373	0.1113	0.168883	0.192612	0.150797	0.0989329	0.0242389	0.0148449	0.0814602	0.111268	0.210618	0.137741	0.121302	0.106584	0.0454241	0.0112308	FALSE	FALSE	FALSE	FALSE	FALSE	FALSE	FALSE	FALSE	FALSE	FALSE	FALSE	FALSE	FALSE	FALSE	FALSE	FALSE
YEL017W	FALSE	0.0775148	0.0234243	0.123228	0.17596	0.207255	0.162526	0.123391	0.0979135	0.0061944	0.0602437	0.0781705	0.184825	0.165901	0.124299	0.0825114	0.0478678	FALSE	FALSE	FALSE	FALSE	FALSE	FALSE	FALSE	FALSE	FALSE	FALSE	FALSE	FALSE	FALSE	FALSE	FALSE	FALSE
YNL306W	FALSE	0.0324485	0.0312931	0.0506857	0.12943	0.0970989	0.0450105	0.0346631	0.0200481	0.0354559	0.0248167	0.136498	0.0778819	0.0306669	0.0707711	0.0398915	0.0378604	FALSE	FALSE	FALSE	FALSE	FALSE	FALSE	FALSE	FALSE	FALSE	FALSE	FALSE	FALSE	FALSE	FALSE	FALSE	FALSE
YDR535C	FALSE	0.0298484	0.0326771	0.0843234	0.117097	0.0342311	0.214263	0.167948	0.111105	0.0636959	0.0649926	0.0630152	0.0512218	0.172385	0.167537	0.100218	0.153956	FALSE	FALSE	FALSE	FALSE	FALSE	FALSE	FALSE	FALSE	FALSE	FALSE	FALSE	FALSE	FALSE	FALSE	FALSE	FALSE
YKR100C	FALSE	0.0448535	0.0377144	0.0313281	0.0270084	0.0215888	0.00291794	0.00883315	0.00216772	0.038687	0.0163909	0.0496173	0.0032519	0.00455627	0.0113364	0.0330538	0.0520949	FALSE	FALSE	FALSE	FALSE	FALSE	FALSE	FALSE	FALSE	FALSE	FALSE	FALSE	FALSE	FALSE	FALSE	FALSE	FALSE
YNL177C	FALSE	0.00578781	0.0428646	0.0666788	0.0846709	0.0575161	0.0511351	0.041645	0.0383873	0.0751153	0.0871156	0.0754369	0.0485509	0.0385932	0.0180729	0.0290184	0.0224823	FALSE	FALSE	FALSE	FALSE	FALSE	FALSE	FALSE	FALSE	FALSE	FALSE	FALSE	FALSE	FALSE	FALSE	FALSE	FALSE
YNL228W	FALSE	0.0121286	0.0306504	0.132679	0.00111322	0.0270711	0.0166024	0.0213309	0.049504	0.0654708	0.0224334	0.0780039	0.00724984	0.0517544	0.0190392	0.0778041	0.0843719	FALSE	FALSE	FALSE	FALSE	FALSE	FALSE	FALSE	FALSE	FALSE	FALSE	FALSE	FALSE	FALSE	FALSE	FALSE	FALSE
YPR095C	FALSE	0.0266346	0.0116615	0.0123019	0.0281911	0.0418967	0.0343888	0.0303988	0.00176848	0.0054858	0.0223913	0.0433728	0.0322564	0.022455	0.0296659	0.0423062	0.0155479	FALSE	FALSE	FALSE	FALSE	FALSE	FALSE	FALSE	FALSE	FALSE	FALSE	FALSE	FALSE	FALSE	FALSE	FALSE	FALSE
YJR130C	FALSE	0.128449	0.0430976	0.0589349	0.0248095	0.0144056	0.0253812	0.00662333	0.0186645	0.00798588	0.0283688	0.0529639	0.0448325	0.0768372	0.0342987	0.0470764	0.0296995	FALSE	FALSE	FALSE	FALSE	FALSE	FALSE	FALSE	FALSE	FALSE	FALSE	FALSE	FALSE	FALSE	FALSE	FALSE	FALSE
YFR024C-A	FALSE	0.00388289	0.0146589	0.0353999	0.014551	0.038861	0.054957	0.0260892	0.0278756	0.0131081	0.0141806	0.0666841	0.0471427	0.0754192	0.0360626	0.0202653	0.0711316	FALSE	FALSE	FALSE	FALSE	FALSE	FALSE	FALSE	FALSE	FALSE	FALSE	FALSE	FALSE	FALSE	FALSE	FALSE	FALSE
YKR101W	FALSE	0.126366	0.0762595	0.0795146	0.0403056	0.00402991	0.00204753	0.0311006	0.0702544	0.0169002	0.0368694	0.0498461	0.0562908	0.0335007	0.0261824	0.0526061	0.0105266	FALSE	FALSE	FALSE	FALSE	FALSE	FALSE	FALSE	FALSE	FALSE	FALSE	FALSE	FALSE	FALSE	FALSE	FALSE	FALSE
YOL151W	FALSE	0.0436745	0.0366342	0.0595212	0.0236422	0.0327594	0.00937377	0.00833399	0.048201	0.0512417	0.0979004	0.032456	0.070233	0.0669412	0.00890917	0.0570431	0.0623146	FALSE	FALSE	FALSE	FALSE	FALSE	FALSE	FALSE	FALSE	FALSE	FALSE	FALSE	FALSE	FALSE	FALSE	FALSE	FALSE
YJR022W	FALSE	0.0455494	0.00310487	0.0656557	0.0101087	0.0300173	0.0379686	0.16598	0.053384	0.033123	0.0281232	0.0445045	0.0581055	0.0185595	0.0260791	0.0143809	0.0278017	FALSE	FALSE	FALSE	FALSE	FALSE	FALSE	FALSE	FALSE	FALSE	FALSE	FALSE	FALSE	FALSE	FALSE	FALSE	FALSE
YGL031C	FALSE	0.0140363	0.00351251	0.00357807	0.0159823	0.0680754	0.0463657	0.01895	0.0110414	0.0185337	0.00616157	0.0604762	0.0737654	0.0890646	0.0340667	0.00469657	0.0597582	FALSE	FALSE	FALSE	FALSE	FALSE	FALSE	FALSE	FALSE	FALSE	FALSE	FALSE	FALSE	FALSE	FALSE	FALSE	FALSE
YOR227W	FALSE	0.021595	0.00547215	0.0461417	0.0133182	0.00156031	0.00781168	0.00908244	0.0203847	0.0095591	0.0350154	0.0422989	0.0349359	0.0196801	0.0461645	0.0309566	0.0463395	FALSE	FALSE	FALSE	FALSE	FALSE	FALSE	FALSE	FALSE	FALSE	FALSE	FALSE	FALSE	FALSE	FALSE	FALSE	FALSE
YGR180C	FALSE	0.00497011	0.0133454	0.00542385	0.0521019	0.0415665	0.0667724	0.0575799	0.00653837	0.00420609	0.0356559	0.0924762	0.0182568	0.00906711	0.0527148	0.04918	0.01351	FALSE	FALSE	FALSE	FALSE	FALSE	FALSE	FALSE	FALSE	FALSE	FALSE	FALSE	FALSE	FALSE	FALSE	FALSE	FALSE
YKL159C	FALSE	0.0276746	0.0102915	0.0580894	0.0022919	0.00459199	0.0265412	0.0522047	0.0585348	0.0237095	0.0459605	0.0131852	0.0322073	0.0610614	0.0533433	0.0311027	0.0077019	FALSE	FALSE	FALSE	FALSE	FALSE	FALSE	FALSE	FALSE	FALSE	FALSE	FALSE	FALSE	FALSE	FALSE	FALSE	FALSE
YFL059W	FALSE	0.114369	0.108397	0.0989402	0.120378	0.0769245	0.0980625	0.207916	0.190404	0.140338	0.149348	0.125375	0.0909561	0.0461305	0.178307	0.038601	0.187887	FALSE	FALSE	FALSE	FALSE	FALSE	FALSE	FALSE	FALSE	FALSE	FALSE	FALSE	FALSE	FALSE	FALSE	FALSE	FALSE
YPL144W	FALSE	0.0558618	0.0306409	0.0158754	0.0581342	0.0355015	0.0707642	0.0624349	0.0480287	0.00849035	0.00329309	0.0809602	0.0669803	0.0552372	0.00285671	0.0238309	0.0525419	FALSE	FALSE	FALSE	FALSE	FALSE	FALSE	FALSE	FALSE	FALSE	FALSE	FALSE	FALSE	FALSE	FALSE	FALSE	FALSE
YDL001W	FALSE	0.0406468	0.00366237	0.0150476	0.0454795	0.0220412	0.0323638	0.0226659	0.0318471	0.0177281	0.0286085	0.00150371	0.0222628	0.0423656	0.0065442	0.0407624	0.0176503	FALSE	FALSE	FALSE	FALSE	FALSE	FALSE	FALSE	FALSE	FALSE	FALSE	FALSE	FALSE	FALSE	FALSE	FALSE	FALSE
YPL167C	FALSE	0.050022	0.0135788	0.0115035	0.0150868	0.034416	0.0270146	0.00447807	0.0600091	0.0102078	0.0324989	0.0400183	0.013349	0.0073953	0.0434838	0.0292161	0.0199256	FALSE	FALSE	FALSE	FALSE	FALSE	FALSE	FALSE	FALSE	FALSE	FALSE	FALSE	FALSE	FALSE	FALSE	FALSE	FALSE
YLR035C	FALSE	0.0220893	0.0103876	0.0577511	0.0863494	0.092066	0.080743	0.0454737	0.0541139	0.0152182	0.050592	0.0769792	0.0801857	0.0524666	0.0512987	0.0466199	0.0701715	FALSE	FALSE	FALSE	FALSE	FALSE	FALSE	FALSE	FALSE	FALSE	FALSE	FALSE	FALSE	FALSE	FALSE	FALSE	FALSE
YLR400W	FALSE	0.0775911	0.0743122	0.0438541	0.0497506	0.0461103	0.0439267	0.00641516	0.00680819	0.0716819	0.0520346	0.1516	0.0568576	0.0578199	0.0414117	0.0282416	0.00599436	FALSE	FALSE	FALSE	FALSE	FALSE	FALSE	FALSE	FALSE	FALSE	FALSE	FALSE	FALSE	FALSE	FALSE	FALSE	FALSE
YDR127W	FALSE	0.214688	0.113326	0.0383728	0.0036602	0.0510962	0.0551405	0.084901	0.105128	0.0776463	0.0545854	0.0333396	0.0214703	0.0158408	0.0112131	0.00603042	0.0079009	FALSE	FALSE	FALSE	FALSE	FALSE	FALSE	FALSE	FALSE	FALSE	FALSE	FALSE	FALSE	FALSE	FALSE	FALSE	FALSE
YPL061W	FALSE	0.0996162	0.174658	0.459594	0.502947	0.483093	0.316351	0.137549	0.0317902	0.148576	0.2876	0.251804	0.283092	0.31685	0.240425	0.211116	0.213094	FALSE	FALSE	TRUE	TRUE	TRUE	TRUE	FALSE	FALSE	FALSE	TRUE	TRUE	TRUE	TRUE	FALSE	FALSE	FALSE
YKR055W	FALSE	0.0252378	0.0113705	0.00958346	0.0822651	0.0410978	0.0766444	0.134645	0.0798359	0.0367141	0.0566943	0.0287711	0.039058	0.0576572	0.0415969	0.0892593	0.106161	FALSE	FALSE	FALSE	FALSE	FALSE	FALSE	FALSE	FALSE	FALSE	FALSE	FALSE	FALSE	FALSE	FALSE	FALSE	FALSE
YLR033W	FALSE	0.0391232	0.0312385	0.00507143	0.052794	0.0991674	0.123145	0.0706588	0.0718904	0.0511813	0.00710148	0.0248899	0.0348782	0.0505293	0.0690241	0.107945	0.0698597	FALSE	FALSE	FALSE	FALSE	FALSE	FALSE	FALSE	FALSE	FALSE	FALSE	FALSE	FALSE	FALSE	FALSE	FALSE	FALSE
YFL017C	FALSE	0.193428	0.0901848	0.0425796	0.110073	0.152876	0.165308	0.151693	0.136534	0.0468345	0.113052	0.0575619	0.0778623	0.114624	0.0935891	0.0597198	0.0529114	FALSE	FALSE	FALSE	FALSE	FALSE	FALSE	FALSE	FALSE	FALSE	FALSE	FALSE	FALSE	FALSE	FALSE	FALSE	FALSE
YLR392C	FALSE	0.0877253	0.0507978	0.112035	0.0573062	0.0316306	0.0677011	0.0237554	0.0198962	0.0306758	0.0362723	0.0272549	0.096341	0.068265	0.0894184	0.0485405	0.0144673	FALSE	FALSE	FALSE	FALSE	FALSE	FALSE	FALSE	FALSE	FALSE	FALSE	FALSE	FALSE	FALSE	FALSE	FALSE	FALSE
YPR155C	FALSE	0.118542	0.0574361	0.0399674	0.0423369	0.0682313	0.0907322	0.113567	0.0552446	0.0898607	0.0478038	0.036454	0.00645868	0.0216928	0.059473	0.0500269	0.0169863	FALSE	FALSE	FALSE	FALSE	FALSE	FALSE	FALSE	FALSE	FALSE	FALSE	FALSE	FALSE	FALSE	FALSE	FALSE	FALSE
YGL237C	FALSE	0.140514	0.0638002	0.0438904	0.016267	0.0466847	0.084803	0.0674376	0.0714217	0.013835	0.013185	0.00832625	0.00395396	0.00737487	0.0508421	0.00253468	0.00828182	FALSE	FALSE	FALSE	FALSE	FALSE	FALSE	FALSE	FALSE	FALSE	FALSE	FALSE	FALSE	FALSE	FALSE	FALSE	FALSE
YMR197C	FALSE	0.0597388	0.0885467	0.115856	0.0664778	0.0307234	0.0036126	0.0302993	0.0654552	0.0518564	0.117727	0.0898242	0.0929666	0.0474846	0.00552352	0.0206602	0.0305583	FALSE	FALSE	FALSE	FALSE	FALSE	FALSE	FALSE	FALSE	FALSE	FALSE	FALSE	FALSE	FALSE	FALSE	FALSE	FALSE
YHR164C	FALSE	0.0170135	0.0416727	0.0272109	0.0413157	0.0223251	0.0187899	0.00322402	0.0417244	0.0836845	0.042883	0.0618162	0.0153298	0.023639	0.0213397	0.0036285	0.0272025	FALSE	FALSE	FALSE	FALSE	FALSE	FALSE	FALSE	FALSE	FALSE	FALSE	FALSE	FALSE	FALSE	FALSE	FALSE	FALSE
YJL061W	FALSE	0.0421207	0.0192978	0.0106377	0.0508475	0.0084283	0.0130302	0.00938463	0.0102859	0.00170747	0.0345803	0.0108378	0.00522424	0.0244359	0.0278155	0.00809205	0.0312915	FALSE	FALSE	FALSE	FALSE	FALSE	FALSE	FALSE	FALSE	FALSE	FALSE	FALSE	FALSE	FALSE	FALSE	FALSE	FALSE
YMR242C	FALSE	0.00820089	0.0133554	0.00507915	0.0162098	0.0460627	0.027957	0.0124044	0.0499764	0.0245862	0.0168225	0.00898328	0.00735103	0.0385464	0.0132508	0.0289615	0.0415882	FALSE	FALSE	FALSE	FALSE	FALSE	FALSE	FALSE	FALSE	FALSE	FALSE	FALSE	FALSE	FALSE	FALSE	FALSE	FALSE
YPL070W	FALSE	0.0632224	0.075731	0.0516284	0.0482114	0.00373082	0.0587716	0.0398678	0.0814347	0.0932115	0.035141	0.0353456	0.00294092	0.0267266	0.0382797	0.0234658	0.0188864	FALSE	FALSE	FALSE	FALSE	FALSE	FALSE	FALSE	FALSE	FALSE	FALSE	FALSE	FALSE	FALSE	FALSE	FALSE	FALSE
YBR117C	FALSE	0.00465842	0.0280265	0.0148206	0.0365863	0.0369328	0.0136103	0.0123213	0.00321941	0.0310528	0.015764	0.0126347	0.0342806	0.0299425	0.0608206	0.0751339	0.0430984	FALSE	FALSE	FALSE	FALSE	FALSE	FALSE	FALSE	FALSE	FALSE	FALSE	FALSE	FALSE	FALSE	FALSE	FALSE	FALSE
YAL044C	FALSE	0.0465832	0.0787384	0.150319	0.136177	0.109311	0.109392	0.105853	0.031116	0.0132836	0.0728478	0.0874413	0.0868968	0.103679	0.135638	0.135651	0.102143	FALSE	FALSE	FALSE	FALSE	FALSE	FALSE	FALSE	FALSE	FALSE	FALSE	FALSE	FALSE	FALSE	FALSE	FALSE	FALSE
YLR276C	FALSE	0.0481779	0.0505982	0.0872353	0.0420956	0.0386726	0.0712406	0.0398587	0.0128008	0.0085802	0.0591576	0.0182872	0.0512201	0.0642437	0.0346375	0.0837212	0.103253	FALSE	FALSE	FALSE	FALSE	FALSE	FALSE	FALSE	FALSE	FALSE	FALSE	FALSE	FALSE	FALSE	FALSE	FALSE	FALSE
YHR141C	FALSE	0.015164	0.0159194	0.00666228	0.014541	0.0717214	0.0743943	0.0192312	0.0253561	0.0234219	0.00757135	0.00689296	0.0426669	0.0606454	0.0070941	0.00890638	0.0195917	FALSE	FALSE	FALSE	FALSE	FALSE	FALSE	FALSE	FALSE	FALSE	FALSE	FALSE	FALSE	FALSE	FALSE	FALSE	FALSE
YBR057C	FALSE	0.0822205	0.0472695	0.0300322	0.035205	0.0743204	0.0229993	0.0351624	0.00450109	0.0456135	0.0304534	0.0861805	0.0203527	0.00151137	0.0330391	0.00719951	0.0424741	FALSE	FALSE	FALSE	FALSE	FALSE	FALSE	FALSE	FALSE	FALSE	FALSE	FALSE	FALSE	FALSE	FALSE	FALSE	FALSE
YGL023C	FALSE	0.00373497	0.00657875	0.00496309	0.0509908	0.0274288	0.0225816	0.012895	0.0217209	0.0261555	0.0139221	0.00640691	0.0258182	0.0174918	0.0218365	0.0191342	0.00399217	FALSE	FALSE	FALSE	FALSE	FALSE	FALSE	FALSE	FALSE	FALSE	FALSE	FALSE	FALSE	FALSE	FALSE	FALSE	FALSE
YOR064C	FALSE	0.0312668	0.0120012	0.00520476	0.0298786	0.0364144	0.0624118	0.0735013	0.108225	0.0910832	0.0608441	0.0205934	0.0298857	0.029012	0.0531778	0.0559649	0.0912029	FALSE	FALSE	FALSE	FALSE	FALSE	FALSE	FALSE	FALSE	FALSE	FALSE	FALSE	FALSE	FALSE	FALSE	FALSE	FALSE
YLR455W	FALSE	0.0462863	0.0393238	0.114625	0.0870005	0.0909809	0.0826458	0.0876354	0.0730076	0.0250701	0.10627	0.0582743	0.119281	0.162824	0.0253689	0.00779303	0.0432308	FALSE	FALSE	FALSE	FALSE	FALSE	FALSE	FALSE	FALSE	FALSE	FALSE	FALSE	FALSE	FALSE	FALSE	FALSE	FALSE
YOR158W	FALSE	0.0316812	0.0408743	0.0852181	0.155062	0.119717	0.0785227	0.0666972	0.0150274	0.0608765	0.112999	0.126122	0.0968031	0.0713817	0.0678379	0.0268188	0.0154795	FALSE	FALSE	FALSE	FALSE	FALSE	FALSE	FALSE	FALSE	FALSE	FALSE	FALSE	FALSE	FALSE	FALSE	FALSE	FALSE
YNL209W	FALSE	0.014457	0.00364353	0.00714347	0.00336941	0.0244123	0.0149677	0.00903357	0.0146913	0.0199304	0.0513323	0.0124243	0.00128798	0.0242936	0.00675561	0.0209424	0.0213642	FALSE	FALSE	FALSE	FALSE	FALSE	FALSE	FALSE	FALSE	FALSE	FALSE	FALSE	FALSE	FALSE	FALSE	FALSE	FALSE
YAL047C	FALSE	0.0614235	0.083125	0.022571	0.0206313	0.00527906	0.0090384	0.0331897	0.0125017	0.017431	0.0546175	0.064369	0.0114145	0.0136758	0.0119897	0.0353824	0.0400977	FALSE	FALSE	FALSE	FALSE	FALSE	FALSE	FALSE	FALSE	FALSE	FALSE	FALSE	FALSE	FALSE	FALSE	FALSE	FALSE
YDR027C	FALSE	0.115624	0.0463598	0.0402245	0.046204	0.0727798	0.0893494	0.0746447	0.0814916	0.0399278	0.0181275	0.0189946	0.0397119	0.0530349	0.00569893	0.0364738	0.0218491	FALSE	FALSE	FALSE	FALSE	FALSE	FALSE	FALSE	FALSE	FALSE	FALSE	FALSE	FALSE	FALSE	FALSE	FALSE	FALSE
YPL041C	FALSE	0.119972	0.110898	0.0978027	0.102424	0.00753079	0.038226	0.0291545	0.074459	0.0525877	0.0329236	0.0440083	0.0406085	0.0430002	0.128686	0.014851	0.0252683	FALSE	FALSE	FALSE	FALSE	FALSE	FALSE	FALSE	FALSE	FALSE	FALSE	FALSE	FALSE	FALSE	FALSE	FALSE	FALSE
YLR402W	FALSE	0.0358993	0.0628525	0.0400179	0.158403	0.0468506	0.0741413	0.134138	0.0300409	0.00690528	0.204954	0.014986	0.0643683	0.153689	0.0661563	0.0848019	0.158052	FALSE	FALSE	FALSE	FALSE	FALSE	FALSE	FALSE	FALSE	FALSE	FALSE	FALSE	FALSE	FALSE	FALSE	FALSE	FALSE
YCL026C-B	FALSE	0.0259685	0.0249265	0.0685262	0.0285251	0.023251	0.00489295	0.0356419	0.0263859	0.0546174	0.0269537	0.0439749	0.01901	0.0306442	0.0616488	0.0120562	0.0707154	FALSE	FALSE	FALSE	FALSE	FALSE	FALSE	FALSE	FALSE	FALSE	FALSE	FALSE	FALSE	FALSE	FALSE	FALSE	FALSE
YDR421W	FALSE	0.0222703	0.0429849	0.0996352	0.0769593	0.0322657	0.016437	0.0141743	0.0469622	0.0744317	0.0280977	0.0643094	0.0489004	0.0105467	0.0112375	0.00716891	0.0124113	FALSE	FALSE	FALSE	FALSE	FALSE	FALSE	FALSE	FALSE	FALSE	FALSE	FALSE	FALSE	FALSE	FALSE	FALSE	FALSE
YHR168W	FALSE	0.135242	0.0456215	0.0447826	0.0590725	0.0459462	0.0563725	0.0166311	0.00269599	0.00597821	0.0567703	0.045986	0.114404	0.0603373	0.0471872	0.0450731	0.0283073	FALSE	FALSE	FALSE	FALSE	FALSE	FALSE	FALSE	FALSE	FALSE	FALSE	FALSE	FALSE	FALSE	FALSE	FALSE	FALSE
YDR295C	FALSE	0.0200047	0.0237037	0.0103217	0.0387876	0.0526466	0.0389935	0.0383517	0.00352498	0.0212648	0.0202197	0.0117961	0.00621853	0.0062713	0.0282483	0.0170731	0.0208244	FALSE	FALSE	FALSE	FALSE	FALSE	FALSE	FALSE	FALSE	FALSE	FALSE	FALSE	FALSE	FALSE	FALSE	FALSE	FALSE
YKL154W	FALSE	0.0154395	0.0122555	0.0576633	0.0533884	0.072244	0.0495072	0.0196558	0.0716058	0.0156699	0.00449481	0.00842729	0.0583292	0.04932	0.050065	0.0620909	0.0567945	FALSE	FALSE	FALSE	FALSE	FALSE	FALSE	FALSE	FALSE	FALSE	FALSE	FALSE	FALSE	FALSE	FALSE	FALSE	FALSE
YLR099W-A	FALSE	0.00150612	0.0361789	0.0729911	0.0346536	0.0338176	0.0393	0.0240128	0.0566611	0.0397903	0.0860703	0.0641082	0.0233186	0.0600345	0.108095	0.0891313	0.0638069	FALSE	FALSE	FALSE	FALSE	FALSE	FALSE	FALSE	FALSE	FALSE	FALSE	FALSE	FALSE	FALSE	FALSE	FALSE	FALSE
YIL047C	FALSE	0.00818678	0.0538503	0.0776598	0.0523282	0.0653604	0.0504199	0.0292701	0.0116199	0.0069196	0.0488102	0.0801668	0.0747849	0.0678221	0.0387383	0.00785638	0.0107205	FALSE	FALSE	FALSE	FALSE	FALSE	FALSE	FALSE	FALSE	FALSE	FALSE	FALSE	FALSE	FALSE	FALSE	FALSE	FALSE
YDR342C	FALSE	0.108604	0.431345	0.882627	0.77018	0.595447	0.348057	0.0561086	0.154348	0.290277	0.382664	0.445661	0.270012	0.382725	0.5322	0.456406	0.320619	FALSE	TRUE	TRUE	TRUE	TRUE	TRUE	FALSE	FALSE	TRUE	TRUE	TRUE	TRUE	TRUE	TRUE	TRUE	TRUE
YDR078C	FALSE	0.0639778	0.00860227	0.00139904	0.0317556	0.0973797	0.0165992	0.059375	0.0761126	0.112279	0.0342604	0.041658	0.0490078	0.0221897	0.0846493	0.113245	0.00601339	FALSE	FALSE	FALSE	FALSE	FALSE	FALSE	FALSE	FALSE	FALSE	FALSE	FALSE	FALSE	FALSE	FALSE	FALSE	FALSE
YER151C	FALSE	0.0593366	0.0130216	0.0815099	0.0451246	0.0741259	0.0970915	0.0508962	0.0278475	0.0199645	0.041063	0.00952029	0.0337753	0.0677169	0.0301989	0.0255149	0.0351449	FALSE	FALSE	FALSE	FALSE	FALSE	FALSE	FALSE	FALSE	FALSE	FALSE	FALSE	FALSE	FALSE	FALSE	FALSE	FALSE
YLR166C	FALSE	0.0315966	0.0416576	0.00916776	0.0310645	0.0658512	0.0914389	0.0415725	0.0469799	0.042978	0.0339549	0.0250385	0.0439058	0.0359438	0.0198309	0.0398799	0.00631742	FALSE	FALSE	FALSE	FALSE	FALSE	FALSE	FALSE	FALSE	FALSE	FALSE	FALSE	FALSE	FALSE	FALSE	FALSE	FALSE
YCL024W	TRUE	0.447206	0.276727	0.200913	0.0349665	0.189003	0.412674	0.535972	0.806564	0.590129	0.224859	0.0946444	0.217107	0.282517	0.264326	0.212385	0.179936	TRUE	TRUE	FALSE	FALSE	FALSE	TRUE	TRUE	TRUE	TRUE	FALSE	FALSE	FALSE	TRUE	TRUE	FALSE	FALSE
YMR059W	FALSE	0.054549	0.00637462	0.0341014	0.00272377	0.0747166	0.103604	0.0333827	0.0510302	0.0972739	0.0375756	0.0580721	0.031404	0.046156	0.0268886	0.103502	0.0250442	FALSE	FALSE	FALSE	FALSE	FALSE	FALSE	FALSE	FALSE	FALSE	FALSE	FALSE	FALSE	FALSE	FALSE	FALSE	FALSE
YFL029C	TRUE	0.00682013	0.0227648	0.0013122	0.0315731	0.0223554	0.0514975	0.0204952	0.0487886	0.0272094	0.058977	0.0138299	0.0171335	0.00990791	0.0255143	0.00423575	0.0491166	FALSE	FALSE	FALSE	FALSE	FALSE	FALSE	FALSE	FALSE	FALSE	FALSE	FALSE	FALSE	FALSE	FALSE	FALSE	FALSE
YCL040W	FALSE	0.0248851	0.210738	0.518643	0.499364	0.422522	0.248051	0.0359931	0.114723	0.250852	0.332974	0.161413	0.218161	0.275595	0.207289	0.188559	0.211028	FALSE	FALSE	TRUE	TRUE	TRUE	FALSE	FALSE	FALSE	TRUE	TRUE	FALSE	FALSE	TRUE	FALSE	FALSE	FALSE
YGR179C	FALSE	0.152571	0.0340858	0.00100991	0.0768968	0.0581407	0.137813	0.0453539	0.0749446	0.0542922	0.0303789	0.0136418	0.0315929	0.0852377	0.00699212	0.0485346	0.011339	FALSE	FALSE	FALSE	FALSE	FALSE	FALSE	FALSE	FALSE	FALSE	FALSE	FALSE	FALSE	FALSE	FALSE	FALSE	FALSE
YBR185C	FALSE	0.0403051	0.0405984	0.0348717	0.00790561	0.00855742	0.0233059	0.00652676	0.0497055	0.00836785	0.00544998	0.0218413	0.00838662	0.00126811	0.00958407	0.0356244	0.0191097	FALSE	FALSE	FALSE	FALSE	FALSE	FALSE	FALSE	FALSE	FALSE	FALSE	FALSE	FALSE	FALSE	FALSE	FALSE	FALSE
YGR030C	FALSE	0.103934	0.0453625	0.0563	0.12316	0.0650933	0.0188023	0.0244794	0.0403278	0.0505716	0.0933519	0.0834967	0.0393079	0.0568583	0.0962917	0.0324847	0.0578697	FALSE	FALSE	FALSE	FALSE	FALSE	FALSE	FALSE	FALSE	FALSE	FALSE	FALSE	FALSE	FALSE	FALSE	FALSE	FALSE
YIR009W	FALSE	0.0682088	0.0737889	0.0240782	0.00208206	0.047319	0.116355	0.166832	0.0894533	0.226172	0.00383126	0.0931058	0.00349956	0.0262255	0.0729871	0.128563	0.0238657	FALSE	FALSE	FALSE	FALSE	FALSE	FALSE	FALSE	FALSE	FALSE	FALSE	FALSE	FALSE	FALSE	FALSE	FALSE	FALSE
YGR230W	FALSE	0.133603	0.115513	0.15107	0.131412	0.106097	0.0574897	0.0218857	0.252238	0.331172	0.342133	0.1435	0.136888	0.0797955	0.0996859	0.136728	0.126793	FALSE	FALSE	FALSE	FALSE	FALSE	FALSE	FALSE	TRUE	TRUE	TRUE	FALSE	FALSE	FALSE	FALSE	FALSE	FALSE
YLR415C	FALSE	0.0933508	0.0754968	0.0623443	0.0370162	0.138552	0.221987	0.128989	0.116529	0.235513	0.108257	0.101308	0.141383	0.0940943	0.19774	0.0407444	0.00266975	FALSE	FALSE	FALSE	FALSE	FALSE	FALSE	FALSE	FALSE	FALSE	FALSE	FALSE	FALSE	FALSE	FALSE	FALSE	FALSE
YBR209W	FALSE	0.00899451	0.149102	0.263589	0.227908	0.186915	0.0580501	0.187153	0.0242298	0.399886	0.0626237	0.0792306	0.106606	0.189372	0.0105441	0.00892072	0.0852416	FALSE	FALSE	TRUE	FALSE	FALSE	FALSE	FALSE	FALSE	TRUE	FALSE	FALSE	FALSE	FALSE	FALSE	FALSE	FALSE
YPR158C-C	FALSE	0.0563509	0.0103261	0.105958	0.0558995	0.205079	0.13713	0.0953395	0.2151	0.0136202	0.0246272	0.24694	0.0151576	0.0495532	0.109307	0.00113455	0.114343	FALSE	FALSE	FALSE	FALSE	FALSE	FALSE	FALSE	FALSE	FALSE	FALSE	FALSE	FALSE	FALSE	FALSE	FALSE	FALSE
YOR036W	FALSE	0.0102279	0.0662169	0.0758432	0.0726503	0.0842065	0.0705071	0.0370538	0.0215796	0.0613604	0.106957	0.0033511	0.0956818	0.0256846	0.0215394	0.0950285	0.0127203	FALSE	FALSE	FALSE	FALSE	FALSE	FALSE	FALSE	FALSE	FALSE	FALSE	FALSE	FALSE	FALSE	FALSE	FALSE	FALSE
YDR129C	FALSE	0.0366419	0.00579783	0.0334452	0.028136	0.0297041	0.00647168	0.0167728	0.045585	0.0268373	0.0238137	0.055576	0.014341	0.0607246	0.0230672	0.0131333	0.0688758	FALSE	FALSE	FALSE	FALSE	FALSE	FALSE	FALSE	FALSE	FALSE	FALSE	FALSE	FALSE	FALSE	FALSE	FALSE	FALSE
YMR304C-A	FALSE	0.184392	0.18203	0.144403	0.191028	0.106136	0.0021399	0.106909	0.179913	0.35221	0.485399	0.274776	0.174692	0.0161786	0.10421	0.188054	0.176949	FALSE	FALSE	FALSE	FALSE	FALSE	FALSE	FALSE	FALSE	TRUE	TRUE	TRUE	FALSE	FALSE	FALSE	FALSE	FALSE
YLL049W	FALSE	0.0330601	0.0105305	0.0825221	0.0599125	0.0489264	0.0465771	0.037423	0.0035365	0.0465422	0.0252869	0.00992713	0.0159055	0.0319329	0.0261247	0.0193673	0.0690882	FALSE	FALSE	FALSE	FALSE	FALSE	FALSE	FALSE	FALSE	FALSE	FALSE	FALSE	FALSE	FALSE	FALSE	FALSE	FALSE
YDR153C	FALSE	0.0203649	0.0183226	0.016258	0.00625724	0.0248972	0.0471039	0.0711636	0.0752171	0.0668591	0.0224486	0.0550653	0.00452244	0.0092332	0.0570425	0.0511436	0.0562207	FALSE	FALSE	FALSE	FALSE	FALSE	FALSE	FALSE	FALSE	FALSE	FALSE	FALSE	FALSE	FALSE	FALSE	FALSE	FALSE
YEL048C	FALSE	0.118563	0.059172	0.100157	0.11631	0.0679906	0.0611708	0.0533179	0.0273645	0.0395703	0.0659485	0.0955939	0.0274541	0.061686	0.125462	0.137843	0.0100369	FALSE	FALSE	FALSE	FALSE	FALSE	FALSE	FALSE	FALSE	FALSE	FALSE	FALSE	FALSE	FALSE	FALSE	FALSE	FALSE
YPL018W	FALSE	0.101847	0.0550589	0.0113541	0.0637542	0.057551	0.0428432	0.0343824	0.0844997	0.0450803	0.095358	0.0843061	0.0365383	0.00206605	0.0237148	0.0247248	0.0228818	FALSE	FALSE	FALSE	FALSE	FALSE	FALSE	FALSE	FALSE	FALSE	FALSE	FALSE	FALSE	FALSE	FALSE	FALSE	FALSE
YLR319C	FALSE	0.00473462	0.0119023	0.0216845	0.0476093	0.0259703	0.00780429	0.0239883	0.00857448	0.0097652	0.00633008	0.0170596	0.00610238	0.0329957	0.033366	0.0440501	0.0168385	FALSE	FALSE	FALSE	FALSE	FALSE	FALSE	FALSE	FALSE	FALSE	FALSE	FALSE	FALSE	FALSE	FALSE	FALSE	FALSE
YGL222C	FALSE	0.0934474	0.0150896	0.107917	0.036233	0.015025	0.102794	0.108102	0.0567361	0.00526972	0.00324254	0.0417914	0.0120791	0.0605022	0.0258923	0.0229677	0.0486462	FALSE	FALSE	FALSE	FALSE	FALSE	FALSE	FALSE	FALSE	FALSE	FALSE	FALSE	FALSE	FALSE	FALSE	FALSE	FALSE
YPL255W	FALSE	0.190576	0.121573	0.0904982	0.0158925	0.00561834	0.144035	0.151701	0.129097	0.14456	0.187578	0.0582703	0.0401189	0.0455859	0.0137053	0.0672478	0.0476964	FALSE	FALSE	FALSE	FALSE	FALSE	FALSE	FALSE	FALSE	FALSE	FALSE	FALSE	FALSE	FALSE	FALSE	FALSE	FALSE
YJL029C	FALSE	0.0426233	0.0169186	0.00910688	0.0977129	0.122633	0.139605	0.106434	0.0630185	0.0501412	0.00974826	0.0609367	0.0611212	0.084154	0.0744337	0.0995579	0.0440151	FALSE	FALSE	FALSE	FALSE	FALSE	FALSE	FALSE	FALSE	FALSE	FALSE	FALSE	FALSE	FALSE	FALSE	FALSE	FALSE
YBL017C	FALSE	0.0250039	0.0246515	0.0394218	0.00487288	0.0472914	0.0274774	0.00978274	0.00829293	0.00776673	0.0224106	0.0210764	0.0227402	0.013628	0.00300889	0.0239449	0.0322297	FALSE	FALSE	FALSE	FALSE	FALSE	FALSE	FALSE	FALSE	FALSE	FALSE	FALSE	FALSE	FALSE	FALSE	FALSE	FALSE
YBR147W	FALSE	0.114289	0.031658	0.0387713	0.101223	0.188757	0.117086	0.00595004	0.171858	0.0628911	0.0743082	0.0859308	0.0365668	0.0863852	0.00427965	0.103442	0.0511133	FALSE	FALSE	FALSE	FALSE	FALSE	FALSE	FALSE	FALSE	FALSE	FALSE	FALSE	FALSE	FALSE	FALSE	FALSE	FALSE
YNL146W	FALSE	0.0286419	0.0659292	0.355384	0.215423	0.0163584	0.0645414	0.0422465	0.169753	0.15878	0.222375	0.0533092	0.140131	0.133019	0.00116594	0.0276831	0.00871074	FALSE	FALSE	TRUE	FALSE	FALSE	FALSE	FALSE	FALSE	FALSE	FALSE	FALSE	FALSE	FALSE	FALSE	FALSE	FALSE
YDR441C	FALSE	0.044531	0.0429118	0.0239139	0.0578785	0.0548449	0.0787658	0.0654388	0.00708018	0.00469709	0.0565614	0.0135053	0.00345454	0.0189653	0.0311655	0.0350336	0.0109434	FALSE	FALSE	FALSE	FALSE	FALSE	FALSE	FALSE	FALSE	FALSE	FALSE	FALSE	FALSE	FALSE	FALSE	FALSE	FALSE
YBR045C	FALSE	0.160163	0.0214471	0.0751078	0.0303355	0.106226	0.0440135	0.0580089	0.00320139	0.0193863	0.125257	0.0409107	0.00946834	0.0216867	0.0204984	0.031585	0.0743973	FALSE	FALSE	FALSE	FALSE	FALSE	FALSE	FALSE	FALSE	FALSE	FALSE	FALSE	FALSE	FALSE	FALSE	FALSE	FALSE
YBR101C	FALSE	0.0539615	0.0338084	0.0353768	0.0355197	0.0537906	0.0514586	0.0457101	0.0451906	0.0520369	0.0147719	0.01074	0.00797709	0.0304736	0.0539244	0.020509	0.00431127	FALSE	FALSE	FALSE	FALSE	FALSE	FALSE	FALSE	FALSE	FALSE	FALSE	FALSE	FALSE	FALSE	FALSE	FALSE	FALSE
YNL232W	FALSE	0.0207092	0.032361	0.0347891	0.0238994	0.0368121	0.0476798	0.0349234	0.0131198	0.0228858	0.00719905	0.0128728	0.0115737	0.0112935	0.00800445	0.0223174	0.00475364	FALSE	FALSE	FALSE	FALSE	FALSE	FALSE	FALSE	FALSE	FALSE	FALSE	FALSE	FALSE	FALSE	FALSE	FALSE	FALSE
YER086W	FALSE	0.121331	0.108948	0.115209	0.0744797	0.0245249	0.00580642	0.0291514	0.079173	0.0890083	0.126295	0.0782218	0.0785164	0.0494927	0.0280628	0.00873679	0.00929104	FALSE	FALSE	FALSE	FALSE	FALSE	FALSE	FALSE	FALSE	FALSE	FALSE	FALSE	FALSE	FALSE	FALSE	FALSE	FALSE
YML100W	FALSE	0.221081	0.22268	0.402278	0.304769	0.304005	0.22183	0.101768	0.0798964	0.0609183	0.03278	0.00251929	0.175225	0.415564	0.381362	0.344267	0.371249	FALSE	FALSE	TRUE	TRUE	TRUE	FALSE	FALSE	FALSE	FALSE	FALSE	FALSE	FALSE	TRUE	TRUE	TRUE	TRUE
YKL175W	FALSE	0.0314336	0.00574675	0.00791378	0.00285606	0.0246183	0.0145431	0.0252628	0.0578203	0.0303229	0.00708162	0.015942	0.0154647	0.0257922	0.0308512	0.0120869	0.0342148	FALSE	FALSE	FALSE	FALSE	FALSE	FALSE	FALSE	FALSE	FALSE	FALSE	FALSE	FALSE	FALSE	FALSE	FALSE	FALSE
YDR514C	FALSE	0.0539061	0.0389002	0.0454483	0.00155657	0.0455525	0.050984	0.0125794	0.0774716	0.0705131	0.0133947	0.00927131	0.0433743	0.0797152	0.0461993	0.118417	0.0634654	FALSE	FALSE	FALSE	FALSE	FALSE	FALSE	FALSE	FALSE	FALSE	FALSE	FALSE	FALSE	FALSE	FALSE	FALSE	FALSE
YDR365W-B	FALSE	0.112343	0.0506709	0.0909898	0.105385	0.0389063	0.0559928	0.0561483	0.04022	0.138186	0.0232519	0.110854	0.0382334	0.126101	0.0628632	0.111244	0.159214	FALSE	FALSE	FALSE	FALSE	FALSE	FALSE	FALSE	FALSE	FALSE	FALSE	FALSE	FALSE	FALSE	FALSE	FALSE	FALSE
YIL075C	FALSE	0.00558828	0.052454	0.0662534	0.0675813	0.00341531	0.0144617	0.0203469	0.0218346	0.00269343	0.0202788	0.0301586	0.0415386	0.0163724	0.055606	0.0294939	0.0171248	FALSE	FALSE	FALSE	FALSE	FALSE	FALSE	FALSE	FALSE	FALSE	FALSE	FALSE	FALSE	FALSE	FALSE	FALSE	FALSE
YPR190C	FALSE	0.0499408	0.00642031	0.0878335	0.114048	0.0955403	0.0868897	0.0905518	0.0903399	0.0778473	0.0161191	0.0431039	0.0724931	0.13114	0.088335	0.0722261	0.0867858	FALSE	FALSE	FALSE	FALSE	FALSE	FALSE	FALSE	FALSE	FALSE	FALSE	FALSE	FALSE	FALSE	FALSE	FALSE	FALSE
YNR042W	FALSE	0.0477946	0.0224817	0.0758658	0.0742598	0.132537	0.138377	0.0600714	0.010665	0.0218407	0.100624	0.0747301	0.0830661	0.0752453	0.0634034	0.0682244	0.00569379	FALSE	FALSE	FALSE	FALSE	FALSE	FALSE	FALSE	FALSE	FALSE	FALSE	FALSE	FALSE	FALSE	FALSE	FALSE	FALSE
YLR433C	FALSE	0.0011042	0.0150256	0.0481266	0.0172499	0.0423524	0.0310527	0.0250321	0.0479833	0.0392389	0.0441487	0.117475	0.0410165	0.0087906	0.0345364	0.0217721	0.0649275	FALSE	FALSE	FALSE	FALSE	FALSE	FALSE	FALSE	FALSE	FALSE	FALSE	FALSE	FALSE	FALSE	FALSE	FALSE	FALSE
YDR034C-D	FALSE	0.0274542	0.0216181	0.0374835	0.0687635	0.0460319	0.0377781	0.0514268	0.0964034	0.0283661	0.0222975	0.0150632	0.0894081	0.0552555	0.0978162	0.0823294	0.0113733	FALSE	FALSE	FALSE	FALSE	FALSE	FALSE	FALSE	FALSE	FALSE	FALSE	FALSE	FALSE	FALSE	FALSE	FALSE	FALSE
YBR242W	FALSE	0.0316889	0.0653447	0.11271	0.0978816	0.121736	0.110551	0.107399	0.106323	0.0580499	0.00313283	0.0358338	0.116635	0.155376	0.168791	0.145339	0.105482	FALSE	FALSE	FALSE	FALSE	FALSE	FALSE	FALSE	FALSE	FALSE	FALSE	FALSE	FALSE	FALSE	FALSE	FALSE	FALSE
YOR130C	FALSE	0.290807	0.161194	0.0896856	0.0147892	0.0718139	0.129029	0.120637	0.107265	0.114896	0.125712	0.0354288	0.0742063	0.0525072	0.0396857	0.0382903	0.033073	TRUE	FALSE	FALSE	FALSE	FALSE	FALSE	FALSE	FALSE	FALSE	FALSE	FALSE	FALSE	FALSE	FALSE	FALSE	FALSE
YCR028C-A	FALSE	0.00508565	0.0171136	0.00368547	0.0410082	0.00538842	0.014512	0.00360939	0.0288647	0.0403318	0.00151022	0.0173095	0.0205356	0.0339346	0.00340709	0.00220378	0.0107387	FALSE	FALSE	FALSE	FALSE	FALSE	FALSE	FALSE	FALSE	FALSE	FALSE	FALSE	FALSE	FALSE	FALSE	FALSE	FALSE
YLR179C	FALSE	0.00176343	0.00194271	0.04734	0.0751845	0.0948586	0.10466	0.102807	0.0576135	0.00784578	0.0115419	0.0504719	0.0690381	0.0892204	0.0915909	0.0675554	0.0556093	FALSE	FALSE	FALSE	FALSE	FALSE	FALSE	FALSE	FALSE	FALSE	FALSE	FALSE	FALSE	FALSE	FALSE	FALSE	FALSE
YDR081C	FALSE	0.0254252	0.00773449	0.0229107	0.0110159	0.0347394	0.034933	0.0333504	0.00730402	0.0476076	0.0190222	0.00435111	0.0364615	0.00885698	0.00590133	0.0168236	0.0298103	FALSE	FALSE	FALSE	FALSE	FALSE	FALSE	FALSE	FALSE	FALSE	FALSE	FALSE	FALSE	FALSE	FALSE	FALSE	FALSE
YNL153C	FALSE	0.00200038	0.0140506	0.0435072	0.0293666	0.0631277	0.0461259	0.0074355	0.0487531	0.0155649	0.0529405	0.0813789	0.0817943	0.0641194	0.00618306	0.0101362	0.0114759	FALSE	FALSE	FALSE	FALSE	FALSE	FALSE	FALSE	FALSE	FALSE	FALSE	FALSE	FALSE	FALSE	FALSE	FALSE	FALSE
YOR283W	FALSE	0.078053	0.0613286	0.0706376	0.0814558	0.0642791	0.0373285	0.0153783	0.013139	0.057811	0.0907728	0.108873	0.0363744	0.0283324	0.0470578	0.0525579	0.0125553	FALSE	FALSE	FALSE	FALSE	FALSE	FALSE	FALSE	FALSE	FALSE	FALSE	FALSE	FALSE	FALSE	FALSE	FALSE	FALSE
YDR125C	FALSE	0.026398	0.0475553	0.105226	0.00866	0.0252517	0.0333829	0.0665314	0.00815437	0.0319789	0.135815	0.0156036	0.0214434	0.0563064	0.0797998	0.039206	0.0384564	FALSE	FALSE	FALSE	FALSE	FALSE	FALSE	FALSE	FALSE	FALSE	FALSE	FALSE	FALSE	FALSE	FALSE	FALSE	FALSE
YMR044W	FALSE	0.036017	0.037236	0.027812	0.0352532	0.0407961	0.0112846	0.0085334	0.0206529	0.0355896	0.00765139	0.0470035	0.0906721	0.0407338	0.0286379	0.0197605	0.0102482	FALSE	FALSE	FALSE	FALSE	FALSE	FALSE	FALSE	FALSE	FALSE	FALSE	FALSE	FALSE	FALSE	FALSE	FALSE	FALSE
YIL007C	FALSE	0.00215859	0.0357075	0.112975	0.049648	0.100621	0.0369852	0.0233534	0.0456417	0.0463298	0.0266322	0.090023	0.0407656	0.0544686	0.0376166	0.00183515	0.0332647	FALSE	FALSE	FALSE	FALSE	FALSE	FALSE	FALSE	FALSE	FALSE	FALSE	FALSE	FALSE	FALSE	FALSE	FALSE	FALSE
YMR192W	FALSE	0.0478622	0.0617874	0.0252551	0.0536073	0.0782895	0.0584867	0.0186282	0.0749137	0.0167015	0.0223887	0.00784724	0.0140369	0.0343658	0.028365	0.0479469	0.00854805	FALSE	FALSE	FALSE	FALSE	FALSE	FALSE	FALSE	FALSE	FALSE	FALSE	FALSE	FALSE	FALSE	FALSE	FALSE	FALSE
YPL097W	FALSE	0.0111134	0.025626	0.0711673	0.0840991	0.0889448	0.0359131	0.00829018	0.0620273	0.0533379	0.0518195	0.143695	0.0505449	0.0328485	0.0173217	0.0176433	0.0415447	FALSE	FALSE	FALSE	FALSE	FALSE	FALSE	FALSE	FALSE	FALSE	FALSE	FALSE	FALSE	FALSE	FALSE	FALSE	FALSE
YNR003C	FALSE	0.00301292	0.0507512	0.0550073	0.116216	0.0872055	0.0764885	0.0488281	0.0500178	0.00445041	0.0287476	0.00209242	0.0514851	0.0830606	0.0867216	0.101416	0.089776	FALSE	FALSE	FALSE	FALSE	FALSE	FALSE	FALSE	FALSE	FALSE	FALSE	FALSE	FALSE	FALSE	FALSE	FALSE	FALSE
YPL147W	FALSE	0.065325	0.0996625	0.139614	0.0481844	0.0100262	0.0356006	0.0630681	0.0536797	0.111253	0.0337064	0.0572692	0.0413997	0.00758019	0.106551	0.0328783	0.0734451	FALSE	FALSE	FALSE	FALSE	FALSE	FALSE	FALSE	FALSE	FALSE	FALSE	FALSE	FALSE	FALSE	FALSE	FALSE	FALSE
YPL154C	FALSE	0.240659	0.127867	0.0286693	0.125957	0.141429	0.154056	0.1248	0.048316	0.00420793	0.0355967	0.0446755	0.00726709	0.025405	0.0235305	0.0400821	0.0569731	FALSE	FALSE	FALSE	FALSE	FALSE	FALSE	FALSE	FALSE	FALSE	FALSE	FALSE	FALSE	FALSE	FALSE	FALSE	FALSE
YER011W	FALSE	0.391729	0.123873	0.0411964	0.145596	0.112623	0.0677242	0.0510909	0.0450242	0.0645023	0.046661	0.194056	0.195125	0.0920704	0.0523247	0.299987	0.428987	TRUE	FALSE	FALSE	FALSE	FALSE	FALSE	FALSE	FALSE	FALSE	FALSE	FALSE	FALSE	FALSE	FALSE	TRUE	TRUE
YKR064W	FALSE	0.0348297	0.0122165	0.0120709	0.0503917	0.0103306	0.0111455	0.0454539	0.0360445	0.0416288	0.0282089	0.00626656	0.0213054	0.0444519	0.0136541	0.0284286	0.025835	FALSE	FALSE	FALSE	FALSE	FALSE	FALSE	FALSE	FALSE	FALSE	FALSE	FALSE	FALSE	FALSE	FALSE	FALSE	FALSE
YDL149W	FALSE	0.0751309	0.0207637	0.00820212	0.0952143	0.0934934	0.116863	0.0715165	0.108166	0.016766	0.021657	0.0451276	0.0737624	0.142751	0.0826354	0.112088	0.0478576	FALSE	FALSE	FALSE	FALSE	FALSE	FALSE	FALSE	FALSE	FALSE	FALSE	FALSE	FALSE	FALSE	FALSE	FALSE	FALSE
YHR158C	FALSE	0.0921224	0.0894004	0.102865	0.0629555	0.0369085	0.0256861	0.0368913	0.0901367	0.122653	0.0906887	0.0987096	0.0246792	0.028162	0.0132328	0.0172742	0.00714266	FALSE	FALSE	FALSE	FALSE	FALSE	FALSE	FALSE	FALSE	FALSE	FALSE	FALSE	FALSE	FALSE	FALSE	FALSE	FALSE
YJR124C	FALSE	0.00621638	0.0361367	0.0457804	0.0378434	0.0463949	0.0161421	0.0101651	0.00319823	0.0320919	0.0606076	0.00642853	0.0469206	0.0410846	0.00323903	0.0133713	0.00813598	FALSE	FALSE	FALSE	FALSE	FALSE	FALSE	FALSE	FALSE	FALSE	FALSE	FALSE	FALSE	FALSE	FALSE	FALSE	FALSE
YLR038C	FALSE	0.0956691	0.0296859	0.0625894	0.0202101	0.0579449	0.0279962	0.0285305	0.00709254	0.0430816	0.0390301	0.0704545	0.0121833	0.00627249	0.00572259	0.00986325	0.035594	FALSE	FALSE	FALSE	FALSE	FALSE	FALSE	FALSE	FALSE	FALSE	FALSE	FALSE	FALSE	FALSE	FALSE	FALSE	FALSE
YMR142C	FALSE	0.0308028	0.00396779	0.00589315	0.0195608	0.0299648	0.0246952	0.0193176	0.0148098	0.00104762	0.0118806	0.0411222	0.0224468	0.0230678	0.0186158	0.0118058	0.0259064	FALSE	FALSE	FALSE	FALSE	FALSE	FALSE	FALSE	FALSE	FALSE	FALSE	FALSE	FALSE	FALSE	FALSE	FALSE	FALSE
YHR135C	FALSE	0.0812663	0.0108708	0.0618238	0.107398	0.116763	0.132662	0.115137	0.0732021	0.0444917	0.0223707	0.00427615	0.102492	0.0994757	0.0860512	0.0775784	0.0780611	FALSE	FALSE	FALSE	FALSE	FALSE	FALSE	FALSE	FALSE	FALSE	FALSE	FALSE	FALSE	FALSE	FALSE	FALSE	FALSE
YER101C	FALSE	0.00601546	0.0109363	0.0498687	0.0107498	0.0853905	0.0273084	0.0513488	0.0348839	0.0308323	0.0634402	0.0545832	0.0535241	0.0802549	0.00439631	0.0217384	0.0274629	FALSE	FALSE	FALSE	FALSE	FALSE	FALSE	FALSE	FALSE	FALSE	FALSE	FALSE	FALSE	FALSE	FALSE	FALSE	FALSE
YOR304C-A	FALSE	0.131772	0.115344	0.0644097	0.0889426	0.0249255	0.025014	0.00239029	0.00197226	0.170238	0.0114098	0.22493	0.0375817	0.0169733	0.16475	0.0189807	0.0233388	FALSE	FALSE	FALSE	FALSE	FALSE	FALSE	FALSE	FALSE	FALSE	FALSE	FALSE	FALSE	FALSE	FALSE	FALSE	FALSE
YEL026W	FALSE	0.0162677	0.0358869	0.0681837	0.0979475	0.038062	0.0282873	0.0241661	0.0151452	0.0499445	0.0186291	0.0122516	0.0671209	0.0386776	0.0834943	0.0419861	0.0302535	FALSE	FALSE	FALSE	FALSE	FALSE	FALSE	FALSE	FALSE	FALSE	FALSE	FALSE	FALSE	FALSE	FALSE	FALSE	FALSE
YOR194C	FALSE	0.00911522	0.0169001	0.027417	0.0725855	0.0881705	0.105813	0.0952374	0.0154016	0.0194597	0.069788	0.0230907	0.111685	0.0992815	0.020998	0.0396792	0.00475501	FALSE	FALSE	FALSE	FALSE	FALSE	FALSE	FALSE	FALSE	FALSE	FALSE	FALSE	FALSE	FALSE	FALSE	FALSE	FALSE
YKL155C	FALSE	0.0499332	0.057133	0.068377	0.0556258	0.0283484	0.0204278	0.0225364	0.0789777	0.0706821	0.0798113	0.00674754	0.07301	0.00623353	0.0227104	0.020885	0.0385412	FALSE	FALSE	FALSE	FALSE	FALSE	FALSE	FALSE	FALSE	FALSE	FALSE	FALSE	FALSE	FALSE	FALSE	FALSE	FALSE
YCR021C	FALSE	0.0856135	0.0642531	0.0340478	0.00407208	0.0676904	0.0768629	0.0736984	0.102074	0.045425	0.066937	0.0380792	0.052575	0.0768303	0.00637018	0.00276494	0.00347985	FALSE	FALSE	FALSE	FALSE	FALSE	FALSE	FALSE	FALSE	FALSE	FALSE	FALSE	FALSE	FALSE	FALSE	FALSE	FALSE
YNL267W	FALSE	0.0417212	0.0330684	0.0030705	0.0513213	0.0154293	0.0250975	0.0336768	0.013023	0.00914009	0.0145891	0.00328177	0.0166953	0.00433952	0.0364928	0.0217475	0.0305974	FALSE	FALSE	FALSE	FALSE	FALSE	FALSE	FALSE	FALSE	FALSE	FALSE	FALSE	FALSE	FALSE	FALSE	FALSE	FALSE
YCL064C	FALSE	0.0108457	0.0735293	0.155678	0.0734881	0.0102326	0.0106551	0.0621416	0.0613035	0.0895758	0.154232	0.0737461	0.138897	0.0582975	0.107594	0.232135	0.357738	FALSE	FALSE	FALSE	FALSE	FALSE	FALSE	FALSE	FALSE	FALSE	FALSE	FALSE	FALSE	FALSE	FALSE	FALSE	TRUE
YGR070W	FALSE	0.152821	0.16258	0.221645	0.139448	0.107445	0.052335	0.129496	0.169941	0.211023	0.216836	0.0959479	0.0884264	0.0725898	0.0238978	0.0380628	0.0513771	FALSE	FALSE	FALSE	FALSE	FALSE	FALSE	FALSE	FALSE	FALSE	FALSE	FALSE	FALSE	FALSE	FALSE	FALSE	FALSE
YBR053C	FALSE	0.134962	0.0215012	0.239607	0.318781	0.276497	0.166645	0.13159	0.0810588	0.0140927	0.102644	0.144959	0.119498	0.166315	0.17788	0.145036	0.114484	FALSE	FALSE	FALSE	TRUE	TRUE	FALSE	FALSE	FALSE	FALSE	FALSE	FALSE	FALSE	FALSE	FALSE	FALSE	FALSE
YEL074W	FALSE	0.0902302	0.00483727	0.355753	0.049389	0.276327	0.148312	0.066226	0.131224	0.139706	0.250236	0.146638	0.175111	0.289102	0.065824	0.0623772	0.199724	FALSE	FALSE	TRUE	FALSE	TRUE	FALSE	FALSE	FALSE	FALSE	TRUE	FALSE	FALSE	TRUE	FALSE	FALSE	FALSE
YLR131C	FALSE	0.489215	0.327886	0.221427	0.00620372	0.17274	0.291026	0.314372	0.420527	0.371517	0.330389	0.117688	0.0056561	0.0644766	0.107071	0.142203	0.193815	TRUE	TRUE	FALSE	FALSE	FALSE	TRUE	TRUE	TRUE	TRUE	TRUE	FALSE	FALSE	FALSE	FALSE	FALSE	FALSE
YKR026C	FALSE	0.0562059	0.0582085	0.0476808	0.0227704	0.0292639	0.0209679	0.0183722	0.0315647	0.0332791	0.0160434	0.0589124	0.0179934	0.00134521	0.0610351	0.0472355	0.011759	FALSE	FALSE	FALSE	FALSE	FALSE	FALSE	FALSE	FALSE	FALSE	FALSE	FALSE	FALSE	FALSE	FALSE	FALSE	FALSE
YDR156W	FALSE	0.049435	0.0481282	0.0407892	0.0543183	0.0269598	0.007529	0.0098322	0.0127588	0.0243223	0.108732	0.00823145	0.0453619	0.0440777	0.0969624	0.0880835	0.0856227	FALSE	FALSE	FALSE	FALSE	FALSE	FALSE	FALSE	FALSE	FALSE	FALSE	FALSE	FALSE	FALSE	FALSE	FALSE	FALSE
YDL202W	FALSE	0.0408139	0.020219	0.0635247	0.0949946	0.0874872	0.0434147	0.0181696	0.0289372	0.0548079	0.0830481	0.102119	0.0642816	0.0392502	0.0193151	0.00576045	0.00357497	FALSE	FALSE	FALSE	FALSE	FALSE	FALSE	FALSE	FALSE	FALSE	FALSE	FALSE	FALSE	FALSE	FALSE	FALSE	FALSE
YLR369W	FALSE	0.0211799	0.00103222	0.0161723	0.038051	0.0495673	0.0835677	0.0258429	0.0394826	0.0405994	0.00369854	0.0244458	0.0468918	0.029056	0.0346203	0.00364876	0.00182136	FALSE	FALSE	FALSE	FALSE	FALSE	FALSE	FALSE	FALSE	FALSE	FALSE	FALSE	FALSE	FALSE	FALSE	FALSE	FALSE
Q0250	FALSE	0.390259	0.213521	0.614981	0.368246	0.115311	0.223737	0.212526	0.327354	0.216465	0.342837	0.30853	0.275985	0.253451	0.192938	0.320641	0.146767	TRUE	FALSE	TRUE	TRUE	FALSE	FALSE	FALSE	TRUE	FALSE	TRUE	TRUE	TRUE	TRUE	FALSE	TRUE	FALSE
YBL105C	FALSE	0.102693	0.0538612	0.105469	0.0448699	0.0234847	0.0799736	0.0611895	0.105482	0.100834	0.0585126	0.0236253	0.0338716	0.00817995	0.0284553	0.029636	0.0351392	FALSE	FALSE	FALSE	FALSE	FALSE	FALSE	FALSE	FALSE	FALSE	FALSE	FALSE	FALSE	FALSE	FALSE	FALSE	FALSE
YJL090C	FALSE	0.102979	0.0759391	0.0805949	0.0131021	0.0362834	0.00859492	0.044373	0.0621388	0.0288299	0.102234	0.0255266	0.026436	0.0392094	0.0504521	0.00865671	0.0268662	FALSE	FALSE	FALSE	FALSE	FALSE	FALSE	FALSE	FALSE	FALSE	FALSE	FALSE	FALSE	FALSE	FALSE	FALSE	FALSE
YIL110W	FALSE	0.0474778	0.0377158	0.0383602	0.0193411	0.00940102	0.0346013	0.0402372	0.0108033	0.00175503	0.0166316	0.0114279	0.0265837	0.0100849	0.00603434	0.0359317	0.0260934	FALSE	FALSE	FALSE	FALSE	FALSE	FALSE	FALSE	FALSE	FALSE	FALSE	FALSE	FALSE	FALSE	FALSE	FALSE	FALSE
YJR062C	FALSE	0.0757461	0.0889521	0.0872415	0.00696207	0.0250846	0.0523513	0.0715685	0.0423352	0.0488742	0.0648604	0.00672959	0.0497785	0.0063119	0.0237362	0.00790424	0.010654	FALSE	FALSE	FALSE	FALSE	FALSE	FALSE	FALSE	FALSE	FALSE	FALSE	FALSE	FALSE	FALSE	FALSE	FALSE	FALSE
YMR207C	FALSE	0.00617831	0.0434109	0.071621	0.0249335	0.0299198	0.0342058	0.0440489	0.0358725	0.0171058	0.00660404	0.0558583	0.0268731	0.0271673	0.0806489	0.0578861	0.00182143	FALSE	FALSE	FALSE	FALSE	FALSE	FALSE	FALSE	FALSE	FALSE	FALSE	FALSE	FALSE	FALSE	FALSE	FALSE	FALSE
YLR023C	FALSE	0.0919914	0.0740652	0.136458	0.0880676	0.0283266	0.0428028	0.100263	0.163724	0.168496	0.0921688	0.0154328	0.0162686	0.00371622	0.0292271	0.0215351	0.0329634	FALSE	FALSE	FALSE	FALSE	FALSE	FALSE	FALSE	FALSE	FALSE	FALSE	FALSE	FALSE	FALSE	FALSE	FALSE	FALSE
YLR044C	FALSE	0.00914805	0.00901475	0.00600535	0.0672162	0.028245	0.0622919	0.0604878	0.057664	0.0324948	0.00967148	0.0286418	0.0360485	0.0403273	0.0589165	0.0553973	0.0537097	FALSE	FALSE	FALSE	FALSE	FALSE	FALSE	FALSE	FALSE	FALSE	FALSE	FALSE	FALSE	FALSE	FALSE	FALSE	FALSE
YCR093W	FALSE	0.0354769	0.0137107	0.0116126	0.00249836	0.0193433	0.0128747	0.00367734	0.0407687	0.0273048	0.0614676	0.0314933	0.0025665	0.0206116	0.0244421	0.00348046	0.0108225	FALSE	FALSE	FALSE	FALSE	FALSE	FALSE	FALSE	FALSE	FALSE	FALSE	FALSE	FALSE	FALSE	FALSE	FALSE	FALSE
YPL016W	FALSE	0.0228992	0.0220729	0.0562614	0.0745103	0.0675932	0.0466285	0.00424951	0.0193672	0.0298843	0.0683498	0.0547802	0.0773247	0.0335393	0.0344388	0.00493573	0.00473064	FALSE	FALSE	FALSE	FALSE	FALSE	FALSE	FALSE	FALSE	FALSE	FALSE	FALSE	FALSE	FALSE	FALSE	FALSE	FALSE
YER097W	FALSE	0.0589439	0.00242208	0.0528387	0.0149469	0.293628	0.0691322	0.0794266	0.0602182	0.00624739	0.0081718	0.166935	0.0329569	0.0403139	0.103463	0.120091	0.0429352	FALSE	FALSE	FALSE	FALSE	TRUE	FALSE	FALSE	FALSE	FALSE	FALSE	FALSE	FALSE	FALSE	FALSE	FALSE	FALSE
YER106W	FALSE	0.0374385	0.0227006	0.193111	0.0956266	0.0486687	0.239073	0.022653	0.0365348	0.224613	0.0603796	0.00139172	0.0292602	0.209139	0.182774	0.128039	0.142271	FALSE	FALSE	FALSE	FALSE	FALSE	FALSE	FALSE	FALSE	FALSE	FALSE	FALSE	FALSE	FALSE	FALSE	FALSE	FALSE
YER075C	FALSE	0.112948	0.0438794	0.00996381	0.0771012	0.0654309	0.0620376	0.00153549	0.0262743	0.0292668	0.0542394	0.00199353	0.00975746	0.0144991	0.0256043	0.0202344	0.0610658	FALSE	FALSE	FALSE	FALSE	FALSE	FALSE	FALSE	FALSE	FALSE	FALSE	FALSE	FALSE	FALSE	FALSE	FALSE	FALSE
YER187W	FALSE	0.0458204	0.0887003	0.0397946	0.00151204	0.0356621	0.05021	0.193966	0.096464	0.145773	0.100106	0.010073	0.0600434	0.00358516	0.0918639	0.0385084	0.104463	FALSE	FALSE	FALSE	FALSE	FALSE	FALSE	FALSE	FALSE	FALSE	FALSE	FALSE	FALSE	FALSE	FALSE	FALSE	FALSE
YNL121C	FALSE	0.0280197	0.0456998	0.0373679	0.0226415	0.00833071	0.0247207	0.0165965	0.00346674	0.0380281	0.0192754	0.0426089	0.0440809	0.02194	0.00886464	0.0147232	0.0294763	FALSE	FALSE	FALSE	FALSE	FALSE	FALSE	FALSE	FALSE	FALSE	FALSE	FALSE	FALSE	FALSE	FALSE	FALSE	FALSE
YJR012C	FALSE	0.112955	0.0361831	0.0229935	0.0302944	0.0973546	0.0293471	0.0481925	0.0636473	0.00258425	0.0225561	0.171289	0.00270333	0.0289467	0.0769858	0.0594097	0.020724	FALSE	FALSE	FALSE	FALSE	FALSE	FALSE	FALSE	FALSE	FALSE	FALSE	FALSE	FALSE	FALSE	FALSE	FALSE	FALSE
YPL227C	FALSE	0.0104708	0.0587273	0.103679	0.101961	0.10022	0.0841693	0.0460062	0.0389859	0.0108402	0.0867727	0.106218	0.0764117	0.085777	0.0764206	0.0719953	0.0177213	FALSE	FALSE	FALSE	FALSE	FALSE	FALSE	FALSE	FALSE	FALSE	FALSE	FALSE	FALSE	FALSE	FALSE	FALSE	FALSE
YOR271C	FALSE	0.00404904	0.0236854	0.044001	0.0259242	0.00902723	0.0117659	0.0195554	0.0091397	0.016548	0.0226568	0.0168809	0.0164112	0.00158987	0.00680845	0.0222809	0.012189	FALSE	FALSE	FALSE	FALSE	FALSE	FALSE	FALSE	FALSE	FALSE	FALSE	FALSE	FALSE	FALSE	FALSE	FALSE	FALSE
YJR083C	FALSE	0.133083	0.0692577	0.0752054	0.00267647	0.0320955	0.0747382	0.0283221	0.113224	0.0840648	0.0235545	0.120681	0.019428	0.010369	0.00967723	0.0325917	0.00202225	FALSE	FALSE	FALSE	FALSE	FALSE	FALSE	FALSE	FALSE	FALSE	FALSE	FALSE	FALSE	FALSE	FALSE	FALSE	FALSE
YOR387C	FALSE	0.0419301	0.0683062	0.144152	0.0450089	0.269998	0.058787	0.156908	0.0339836	0.0106196	0.0843169	0.24822	0.0547618	0.143923	0.0898964	0.0938443	0.0897311	FALSE	FALSE	FALSE	FALSE	TRUE	FALSE	FALSE	FALSE	FALSE	FALSE	FALSE	FALSE	FALSE	FALSE	FALSE	FALSE
YOL047C	FALSE	0.185027	0.117878	0.0355575	0.0762629	0.0273427	0.0813779	0.021641	0.233334	0.0909325	0.0506849	0.00145387	0.206702	0.0716082	0.057559	0.0227793	0.0048774	FALSE	FALSE	FALSE	FALSE	FALSE	FALSE	FALSE	FALSE	FALSE	FALSE	FALSE	FALSE	FALSE	FALSE	FALSE	FALSE
YOR123C	FALSE	0.0443528	0.0148476	0.00920745	0.072447	0.0532111	0.00537636	0.0137219	0.0441249	0.0788014	0.00594394	0.0355596	0.0773154	0.0522134	0.0348943	0.01757	0.0198244	FALSE	FALSE	FALSE	FALSE	FALSE	FALSE	FALSE	FALSE	FALSE	FALSE	FALSE	FALSE	FALSE	FALSE	FALSE	FALSE
YIL052C	FALSE	0.00939869	0.0234118	0.0105216	0.0109242	0.0317971	0.0138956	0.0199485	0.0298052	0.01758	0.0070464	0.0687503	0.0322408	0.02667	0.0559128	0.0120617	0.0350344	FALSE	FALSE	FALSE	FALSE	FALSE	FALSE	FALSE	FALSE	FALSE	FALSE	FALSE	FALSE	FALSE	FALSE	FALSE	FALSE
YMR162C	FALSE	0.0667365	0.0394352	0.0699614	0.101271	0.102623	0.0344414	0.050017	0.0234281	0.070122	0.0452166	0.0584991	0.067453	0.0409534	0.0819425	0.0796393	0.0102143	FALSE	FALSE	FALSE	FALSE	FALSE	FALSE	FALSE	FALSE	FALSE	FALSE	FALSE	FALSE	FALSE	FALSE	FALSE	FALSE
YKR063C	FALSE	0.0104953	0.0190821	0.0526166	0.00915602	0.0659445	0.0544612	0.0317512	0.0264901	0.0209417	0.0275151	0.0751863	0.0199768	0.0220473	0.0374634	0.0572892	0.0267208	FALSE	FALSE	FALSE	FALSE	FALSE	FALSE	FALSE	FALSE	FALSE	FALSE	FALSE	FALSE	FALSE	FALSE	FALSE	FALSE
YOR233W	FALSE	0.0338251	0.0464661	0.108814	0.132868	0.175898	0.131536	0.120376	0.0112143	0.0517142	0.107208	0.116367	0.11195	0.158774	0.0804653	0.0294368	0.0245341	FALSE	FALSE	FALSE	FALSE	FALSE	FALSE	FALSE	FALSE	FALSE	FALSE	FALSE	FALSE	FALSE	FALSE	FALSE	FALSE
YPR049C	FALSE	0.0151031	0.0181879	0.0281373	0.00340733	0.0676366	0.0775153	0.0407654	0.0122781	0.0380353	0.0492118	0.00995901	0.0554257	0.00662917	0.025967	0.0227731	0.0207081	FALSE	FALSE	FALSE	FALSE	FALSE	FALSE	FALSE	FALSE	FALSE	FALSE	FALSE	FALSE	FALSE	FALSE	FALSE	FALSE
YMR215W	FALSE	0.0936533	0.068417	0.216032	0.329682	0.337682	0.289588	0.190774	0.106151	0.0719573	0.274755	0.325917	0.368143	0.281315	0.102842	0.00776649	0.0328923	FALSE	FALSE	FALSE	TRUE	TRUE	TRUE	FALSE	FALSE	FALSE	TRUE	TRUE	TRUE	TRUE	FALSE	FALSE	FALSE
YMR216C	FALSE	0.0430242	0.0129489	0.0305816	0.0161931	0.0674941	0.0752389	0.049148	0.0505453	0.0176493	0.0358926	0.0674712	0.0214944	0.0460547	0.0541078	0.0229216	0.0031543	FALSE	FALSE	FALSE	FALSE	FALSE	FALSE	FALSE	FALSE	FALSE	FALSE	FALSE	FALSE	FALSE	FALSE	FALSE	FALSE
YNR039C	FALSE	0.031047	0.0164594	0.0220915	0.00916299	0.0470295	0.0653557	0.0463972	0.0723112	0.0623647	0.00677698	0.0228188	0.0420049	0.0613893	0.0427656	0.0125322	0.0233813	FALSE	FALSE	FALSE	FALSE	FALSE	FALSE	FALSE	FALSE	FALSE	FALSE	FALSE	FALSE	FALSE	FALSE	FALSE	FALSE
YAR027W	FALSE	0.0326213	0.00359561	0.0483886	0.0503772	0.100923	0.10462	0.115644	0.0740199	0.0571497	0.00406746	0.0959824	0.0445674	0.0701676	0.0981803	0.0770357	0.0562376	FALSE	FALSE	FALSE	FALSE	FALSE	FALSE	FALSE	FALSE	FALSE	FALSE	FALSE	FALSE	FALSE	FALSE	FALSE	FALSE
YNL313C	FALSE	0.16305	0.116148	0.121789	0.0554195	0.0502756	0.00809465	0.0233351	0.113192	0.119314	0.116707	0.117329	0.0164677	0.0312161	0.0452222	0.0200452	0.0177571	FALSE	FALSE	FALSE	FALSE	FALSE	FALSE	FALSE	FALSE	FALSE	FALSE	FALSE	FALSE	FALSE	FALSE	FALSE	FALSE
YER038C	FALSE	0.025303	0.007554	0.0431227	0.00196692	0.0289703	0.0542561	0.0128176	0.0051642	0.0297446	0.0197779	0.0229868	0.00992419	0.0307209	0.00182982	0.0459893	0.00520508	FALSE	FALSE	FALSE	FALSE	FALSE	FALSE	FALSE	FALSE	FALSE	FALSE	FALSE	FALSE	FALSE	FALSE	FALSE	FALSE
YDR147W	FALSE	0.130113	0.0303618	0.0198547	0.0655493	0.109246	0.158127	0.151933	0.150894	0.128411	0.04896	0.0752723	0.0432618	0.0965871	0.104981	0.12656	0.0363896	FALSE	FALSE	FALSE	FALSE	FALSE	FALSE	FALSE	FALSE	FALSE	FALSE	FALSE	FALSE	FALSE	FALSE	FALSE	FALSE
YPL270W	FALSE	0.0197252	0.026033	0.0368255	0.0873984	0.0487923	0.0521249	0.00154681	0.0516544	0.050715	0.0759886	0.00555042	0.0261144	0.00365192	0.0248617	0.0613464	0.00473374	FALSE	FALSE	FALSE	FALSE	FALSE	FALSE	FALSE	FALSE	FALSE	FALSE	FALSE	FALSE	FALSE	FALSE	FALSE	FALSE
YMR317W	FALSE	0.0814977	0.0528437	0.0331094	0.018948	0.0394434	0.0666952	0.0792051	0.00981754	0.0343632	0.00667746	0.0147161	0.025711	0.0250231	0.0157084	0.0156777	0.00211686	FALSE	FALSE	FALSE	FALSE	FALSE	FALSE	FALSE	FALSE	FALSE	FALSE	FALSE	FALSE	FALSE	FALSE	FALSE	FALSE
YDR365C	FALSE	0.0220301	0.00943566	0.0122952	0.0708168	0.031841	0.00799612	0.0129254	0.0334911	0.0361449	0.00415544	0.00304304	0.0403743	0.02548	0.0369394	0.0277429	0.0156593	FALSE	FALSE	FALSE	FALSE	FALSE	FALSE	FALSE	FALSE	FALSE	FALSE	FALSE	FALSE	FALSE	FALSE	FALSE	FALSE
Q0050	FALSE	0.364189	0.0762774	0.663969	0.30708	0.229851	0.160131	0.0478845	0.23852	0.226905	0.454258	0.0774755	0.294258	0.203125	0.0376987	0.359203	0.279335	TRUE	FALSE	TRUE	TRUE	FALSE	FALSE	FALSE	FALSE	FALSE	TRUE	FALSE	TRUE	FALSE	FALSE	TRUE	TRUE
YNR043W	FALSE	0.122169	0.0553708	0.00613543	0.0208753	0.047837	0.018289	0.00443153	0.0242925	0.00357236	0.00290046	0.0562194	0.00970203	0.00374437	0.0100672	0.00572064	0.0373683	FALSE	FALSE	FALSE	FALSE	FALSE	FALSE	FALSE	FALSE	FALSE	FALSE	FALSE	FALSE	FALSE	FALSE	FALSE	FALSE
YDR528W	FALSE	0.383206	0.179877	0.113001	0.0712211	0.140004	0.236745	0.279182	0.348158	0.195604	0.132834	0.0354304	0.0542588	0.080401	0.137653	0.0896942	0.0764031	TRUE	FALSE	FALSE	FALSE	FALSE	FALSE	TRUE	TRUE	FALSE	FALSE	FALSE	FALSE	FALSE	FALSE	FALSE	FALSE
YBR092C	FALSE	0.19131	0.158437	0.319646	0.367935	0.247038	0.0330262	0.21636	0.456071	0.480341	0.445752	0.378607	0.10711	0.00515071	0.0244172	0.134105	0.259634	FALSE	FALSE	TRUE	TRUE	FALSE	FALSE	FALSE	TRUE	TRUE	TRUE	TRUE	FALSE	FALSE	FALSE	FALSE	TRUE
YGR067C	FALSE	0.108344	0.0630314	0.0299633	0.0126545	0.130375	0.0971157	0.078174	0.11395	0.113714	0.0274736	0.0579486	0.0620396	0.00243898	0.158408	0.0505109	0.0237111	FALSE	FALSE	FALSE	FALSE	FALSE	FALSE	FALSE	FALSE	FALSE	FALSE	FALSE	FALSE	FALSE	FALSE	FALSE	FALSE
YOR328W	FALSE	0.083534	0.097946	0.0673584	0.055638	0.012533	0.0699265	0.070237	0.0796345	0.0577848	0.0582619	0.0816534	0.0352399	0.0040137	0.0200492	0.0329327	0.0140057	FALSE	FALSE	FALSE	FALSE	FALSE	FALSE	FALSE	FALSE	FALSE	FALSE	FALSE	FALSE	FALSE	FALSE	FALSE	FALSE
YDR487C	FALSE	0.0823298	0.047543	0.0560566	0.0117437	0.0481615	0.0884705	0.100518	0.112279	0.0908455	0.0597031	0.054158	0.0306426	0.0349164	0.0331616	0.0406936	0.0311685	FALSE	FALSE	FALSE	FALSE	FALSE	FALSE	FALSE	FALSE	FALSE	FALSE	FALSE	FALSE	FALSE	FALSE	FALSE	FALSE
YBR008C	FALSE	0.00333245	0.0799446	0.115566	0.190893	0.142112	0.105045	0.0628483	0.0338426	0.12253	0.152168	0.129869	0.20775	0.136949	0.0408138	0.0317605	0.0481158	FALSE	FALSE	FALSE	FALSE	FALSE	FALSE	FALSE	FALSE	FALSE	FALSE	FALSE	FALSE	FALSE	FALSE	FALSE	FALSE
YGR169C-A	FALSE	0.0232835	0.0214445	0.00817101	0.057471	0.0579441	0.0241265	0.0412754	0.0702136	0.00225384	0.154513	0.0320157	0.1213	0.0764777	0.0453565	0.0874995	0.015921	FALSE	FALSE	FALSE	FALSE	FALSE	FALSE	FALSE	FALSE	FALSE	FALSE	FALSE	FALSE	FALSE	FALSE	FALSE	FALSE
YGR096W	FALSE	0.0230178	0.00447257	0.0271608	0.0388029	0.00876289	0.018746	0.00967628	0.0362777	0.0341441	0.0585206	0.0270924	0.00825492	0.0087742	0.011484	0.00626527	0.0404779	FALSE	FALSE	FALSE	FALSE	FALSE	FALSE	FALSE	FALSE	FALSE	FALSE	FALSE	FALSE	FALSE	FALSE	FALSE	FALSE
YKL132C	FALSE	0.0227082	0.0180901	0.0703682	0.0792495	0.052093	0.0234343	0.00552478	0.0303758	0.0486833	0.053267	0.0879726	0.0472559	0.00602075	0.0167129	0.00995609	0.0882378	FALSE	FALSE	FALSE	FALSE	FALSE	FALSE	FALSE	FALSE	FALSE	FALSE	FALSE	FALSE	FALSE	FALSE	FALSE	FALSE
YJL156C	FALSE	0.0258323	0.0223491	0.0530076	0.00894855	0.0260698	0.0363831	0.0247332	0.0175984	0.031831	0.0118725	0.0149741	0.0214618	0.023648	0.00706508	0.0273033	0.0188081	FALSE	FALSE	FALSE	FALSE	FALSE	FALSE	FALSE	FALSE	FALSE	FALSE	FALSE	FALSE	FALSE	FALSE	FALSE	FALSE
YOR303W	FALSE	0.107494	0.00434573	0.0556927	0.00486745	0.00181938	0.0168611	0.0220564	0.00235832	0.0175075	0.0218526	0.00320349	0.046995	0.0487677	0.0344912	0.00251922	0.0209065	FALSE	FALSE	FALSE	FALSE	FALSE	FALSE	FALSE	FALSE	FALSE	FALSE	FALSE	FALSE	FALSE	FALSE	FALSE	FALSE
YJR136C	FALSE	0.00671417	0.0312957	0.0309053	0.0322058	0.0376912	0.00157577	0.0299937	0.0352873	0.0151135	0.102238	0.0565219	0.024745	0.0345461	0.0296759	0.0514079	0.018677	FALSE	FALSE	FALSE	FALSE	FALSE	FALSE	FALSE	FALSE	FALSE	FALSE	FALSE	FALSE	FALSE	FALSE	FALSE	FALSE
YMR122W-A	FALSE	0.138199	0.085095	0.0352096	0.0111288	0.0722046	0.134348	0.184576	0.346865	0.418499	0.0724118	0.156151	0.226373	0.257781	0.0523367	0.131887	0.232243	FALSE	FALSE	FALSE	FALSE	FALSE	FALSE	FALSE	TRUE	TRUE	FALSE	FALSE	FALSE	TRUE	FALSE	FALSE	FALSE
YKL011C	FALSE	0.0722991	0.0161317	0.00964852	0.0463649	0.0101928	0.0900515	0.0849304	0.0757784	0.0461259	0.00369852	0.0116102	0.0726413	0.0423224	0.0229254	0.0574994	0.00330419	FALSE	FALSE	FALSE	FALSE	FALSE	FALSE	FALSE	FALSE	FALSE	FALSE	FALSE	FALSE	FALSE	FALSE	FALSE	FALSE
YPL126W	FALSE	0.0943776	0.0998387	0.114797	0.115418	0.11784	0.109034	0.0539481	0.0349543	0.0442957	0.117073	0.118535	0.0937624	0.0887072	0.0919303	0.082339	0.0691722	FALSE	FALSE	FALSE	FALSE	FALSE	FALSE	FALSE	FALSE	FALSE	FALSE	FALSE	FALSE	FALSE	FALSE	FALSE	FALSE
YML085C	FALSE	0.0341913	0.0645554	0.149428	0.219078	0.206647	0.207465	0.152829	0.038597	0.0782051	0.21723	0.171317	0.186327	0.160538	0.117106	0.0667882	0.00450648	FALSE	FALSE	FALSE	FALSE	FALSE	FALSE	FALSE	FALSE	FALSE	FALSE	FALSE	FALSE	FALSE	FALSE	FALSE	FALSE
YDR403W	FALSE	0.0286975	0.042713	0.00429801	0.079793	0.101727	0.0587468	0.0251448	0.0342908	0.0686021	0.0637954	0.196525	0.0489094	0.0311732	0.0837782	0.00852702	0.0353786	FALSE	FALSE	FALSE	FALSE	FALSE	FALSE	FALSE	FALSE	FALSE	FALSE	FALSE	FALSE	FALSE	FALSE	FALSE	FALSE
YKL017C	FALSE	0.0279955	0.0557624	0.0336763	0.0136291	0.0109453	0.0201608	0.0636146	0.0267129	0.0374034	0.0538101	0.01499	0.0115454	0.0164455	0.0127004	0.00480262	0.0349055	FALSE	FALSE	FALSE	FALSE	FALSE	FALSE	FALSE	FALSE	FALSE	FALSE	FALSE	FALSE	FALSE	FALSE	FALSE	FALSE
YBL038W	FALSE	0.0845308	0.0800774	0.0718847	0.0757537	0.0384467	0.0632609	0.0576423	0.00561876	0.00896212	0.0967053	0.19886	0.0733501	0.0714055	0.112203	0.00317829	0.0523853	FALSE	FALSE	FALSE	FALSE	FALSE	FALSE	FALSE	FALSE	FALSE	FALSE	FALSE	FALSE	FALSE	FALSE	FALSE	FALSE
YGR122W	FALSE	0.0863661	0.0511382	0.0233813	0.0272448	0.001901	0.0386308	0.0389348	0.0270482	0.0169554	0.0443593	0.0712922	0.0136744	0.0101108	0.0326413	0.0321352	0.0258629	FALSE	FALSE	FALSE	FALSE	FALSE	FALSE	FALSE	FALSE	FALSE	FALSE	FALSE	FALSE	FALSE	FALSE	FALSE	FALSE
YHR024C	FALSE	0.0768969	0.0159863	0.0563561	0.0752401	0.0806081	0.0395647	0.050638	0.0769978	0.0507293	0.030383	0.0312193	0.0688368	0.0941265	0.00129333	0.00935986	0.0440618	FALSE	FALSE	FALSE	FALSE	FALSE	FALSE	FALSE	FALSE	FALSE	FALSE	FALSE	FALSE	FALSE	FALSE	FALSE	FALSE
YER113C	FALSE	0.0931812	0.0711971	0.0274853	0.00763147	0.00496108	0.048179	0.0674877	0.0315619	0.0303585	0.035281	0.0386668	0.0116946	0.0162092	0.00794371	0.011838	0.00203635	FALSE	FALSE	FALSE	FALSE	FALSE	FALSE	FALSE	FALSE	FALSE	FALSE	FALSE	FALSE	FALSE	FALSE	FALSE	FALSE
YBR030W	FALSE	0.00309982	0.0269364	0.0754426	0.0234699	0.0400456	0.0574401	0.0565043	0.0341843	0.0160872	0.0288933	0.0028889	0.0534952	0.0497534	0.0668471	0.0339003	0.0697551	FALSE	FALSE	FALSE	FALSE	FALSE	FALSE	FALSE	FALSE	FALSE	FALSE	FALSE	FALSE	FALSE	FALSE	FALSE	FALSE
YLL045C	FALSE	0.0653937	0.022875	0.00131137	0.00119866	0.0358218	0.0101482	0.0138211	0.0314272	0.0332014	0.0251147	0.0195934	0.0121457	0.0402918	0.0278225	0.0490421	0.0492375	FALSE	FALSE	FALSE	FALSE	FALSE	FALSE	FALSE	FALSE	FALSE	FALSE	FALSE	FALSE	FALSE	FALSE	FALSE	FALSE
YOR310C	FALSE	0.0161633	0.0228066	0.0579007	0.0554698	0.0638849	0.076066	0.0465793	0.00802793	0.013615	0.069699	0.0347333	0.0482501	0.0639325	0.0112911	0.0398408	0.0524708	FALSE	FALSE	FALSE	FALSE	FALSE	FALSE	FALSE	FALSE	FALSE	FALSE	FALSE	FALSE	FALSE	FALSE	FALSE	FALSE
YHR021C	FALSE	0.0510869	0.026379	0.0460011	0.0169973	0.12412	0.101465	0.0728109	0.0448515	0.132771	0.0271177	0.170018	0.00762745	0.052379	0.151134	0.130534	0.0169068	FALSE	FALSE	FALSE	FALSE	FALSE	FALSE	FALSE	FALSE	FALSE	FALSE	FALSE	FALSE	FALSE	FALSE	FALSE	FALSE
YIR016W	FALSE	0.0841251	0.00925246	0.0795397	0.0617306	0.0221143	0.00666781	0.0407773	0.00311385	0.0718007	0.0999892	0.0894502	0.00597039	0.0875288	0.0406048	0.0178788	0.00279697	FALSE	FALSE	FALSE	FALSE	FALSE	FALSE	FALSE	FALSE	FALSE	FALSE	FALSE	FALSE	FALSE	FALSE	FALSE	FALSE
YPL171C	FALSE	0.103599	0.115757	0.267619	0.246935	0.176706	0.0287861	0.0644705	0.0698342	0.00396318	0.197288	0.0873383	0.111477	0.114401	0.0098573	0.157973	0.168075	FALSE	FALSE	TRUE	FALSE	FALSE	FALSE	FALSE	FALSE	FALSE	FALSE	FALSE	FALSE	FALSE	FALSE	FALSE	FALSE
YIR018C-A	FALSE	0.0942185	0.0297358	0.0473782	0.0417104	0.00742116	0.0674681	0.00758021	0.0210346	0.0543229	0.127034	0.101335	0.0922055	0.074874	0.0656199	0.0367212	0.0762483	FALSE	FALSE	FALSE	FALSE	FALSE	FALSE	FALSE	FALSE	FALSE	FALSE	FALSE	FALSE	FALSE	FALSE	FALSE	FALSE
YBL070C	FALSE	0.045413	0.057258	0.112293	0.24808	0.198496	0.234784	0.196287	0.0536669	0.045782	0.0114094	0.0453572	0.168578	0.165223	0.133159	0.134557	0.116116	FALSE	FALSE	FALSE	FALSE	FALSE	FALSE	FALSE	FALSE	FALSE	FALSE	FALSE	FALSE	FALSE	FALSE	FALSE	FALSE
YBR001C	FALSE	0.0162662	0.0328488	0.114305	0.111739	0.103577	0.0308045	0.0860645	0.00973718	0.00378324	0.0608667	0.0948564	0.0569413	0.0943899	0.0852242	0.0349285	0.0470047	FALSE	FALSE	FALSE	FALSE	FALSE	FALSE	FALSE	FALSE	FALSE	FALSE	FALSE	FALSE	FALSE	FALSE	FALSE	FALSE
YGR207C	FALSE	0.0274172	0.034531	0.00110464	0.0290541	0.0632726	0.0438065	0.0738389	0.0400117	0.0194359	0.0282352	0.128049	0.0316249	0.00382203	0.0249321	0.0157208	0.0495272	FALSE	FALSE	FALSE	FALSE	FALSE	FALSE	FALSE	FALSE	FALSE	FALSE	FALSE	FALSE	FALSE	FALSE	FALSE	FALSE
YLR287C-A	FALSE	0.0163721	0.00536485	0.0254014	0.00733332	0.025455	0.0156351	0.00637737	0.0543276	0.0358703	0.0208166	0.0631641	0.0169245	0.0369497	0.0515322	0.0505948	0.0053974	FALSE	FALSE	FALSE	FALSE	FALSE	FALSE	FALSE	FALSE	FALSE	FALSE	FALSE	FALSE	FALSE	FALSE	FALSE	FALSE
YCR020C-A	FALSE	0.0485456	0.0314495	0.0556834	0.0325922	0.00912607	0.0332761	0.0455339	0.0460217	0.0429152	0.0572891	0.0893598	0.00558451	0.0138384	0.0867955	0.0114076	0.0128831	FALSE	FALSE	FALSE	FALSE	FALSE	FALSE	FALSE	FALSE	FALSE	FALSE	FALSE	FALSE	FALSE	FALSE	FALSE	FALSE
YMR095C	FALSE	0.481553	0.421247	0.53188	0.439543	0.29374	0.143556	0.0227105	0.201459	0.322755	0.39114	0.339584	0.289836	0.298383	0.17713	0.236208	0.283085	TRUE	TRUE	TRUE	TRUE	TRUE	FALSE	FALSE	FALSE	TRUE	TRUE	TRUE	TRUE	TRUE	FALSE	FALSE	TRUE
YGR252W	FALSE	0.063008	0.00586401	0.00657033	0.0265138	0.0778593	0.0674742	0.102856	0.0274996	0.0601174	0.0346603	0.0171969	0.0521319	0.03024	0.0737289	0.0239957	0.0121635	FALSE	FALSE	FALSE	FALSE	FALSE	FALSE	FALSE	FALSE	FALSE	FALSE	FALSE	FALSE	FALSE	FALSE	FALSE	FALSE
YBR179C	FALSE	0.0506198	0.0607589	0.0733428	0.00290052	0.047797	0.0334368	0.034202	0.0564667	0.0899601	0.059205	0.0154775	0.0320101	0.00901394	0.0217029	0.0355179	0.0390524	FALSE	FALSE	FALSE	FALSE	FALSE	FALSE	FALSE	FALSE	FALSE	FALSE	FALSE	FALSE	FALSE	FALSE	FALSE	FALSE
YER044C-A	FALSE	0.0722651	0.121508	0.213688	0.211653	0.174371	0.17948	0.142103	0.0388481	0.0664719	0.0834581	0.199043	0.219458	0.0819551	0.160618	0.147562	0.164221	FALSE	FALSE	FALSE	FALSE	FALSE	FALSE	FALSE	FALSE	FALSE	FALSE	FALSE	FALSE	FALSE	FALSE	FALSE	FALSE
YLR361C	FALSE	0.0424913	0.014013	0.028833	0.0290434	0.0189692	0.0677251	0.0256773	0.0231975	0.0227315	0.0132906	0.00626254	0.00945742	0.0153776	0.0372504	0.0306065	0.0147126	FALSE	FALSE	FALSE	FALSE	FALSE	FALSE	FALSE	FALSE	FALSE	FALSE	FALSE	FALSE	FALSE	FALSE	FALSE	FALSE
YCL036W	FALSE	0.0831696	0.0577625	0.141056	0.0930103	0.048919	0.0172001	0.0148839	0.0265929	0.0559193	0.0350066	0.0549016	0.0559464	0.0779379	0.0657643	0.0126046	0.0694556	FALSE	FALSE	FALSE	FALSE	FALSE	FALSE	FALSE	FALSE	FALSE	FALSE	FALSE	FALSE	FALSE	FALSE	FALSE	FALSE
YPL173W	FALSE	0.0175599	0.0253077	0.0354704	0.105531	0.068765	0.106674	0.0905648	0.00720505	0.0589095	0.0487713	0.128131	0.0840552	0.0626551	0.0316421	0.0245114	0.00544601	FALSE	FALSE	FALSE	FALSE	FALSE	FALSE	FALSE	FALSE	FALSE	FALSE	FALSE	FALSE	FALSE	FALSE	FALSE	FALSE
YOR220W	FALSE	0.0298636	0.0192047	0.112845	0.0410945	0.0342856	0.0144453	0.00598811	0.0153883	0.035313	0.0173489	0.0248595	0.00747396	0.0233975	0.0416961	0.0228387	0.0336862	FALSE	FALSE	FALSE	FALSE	FALSE	FALSE	FALSE	FALSE	FALSE	FALSE	FALSE	FALSE	FALSE	FALSE	FALSE	FALSE
YEL069C	FALSE	0.010678	0.0744429	0.0135007	0.0141383	0.11549	0.0113452	0.0416148	0.0665959	0.0147072	0.0173464	0.1285	0.101391	0.121899	0.0662229	0.12108	0.0335562	FALSE	FALSE	FALSE	FALSE	FALSE	FALSE	FALSE	FALSE	FALSE	FALSE	FALSE	FALSE	FALSE	FALSE	FALSE	FALSE
YMR241W	FALSE	0.0854527	0.0611999	0.0637845	0.0358173	0.0224229	0.0376501	0.0276415	0.070223	0.0525607	0.0631531	0.0054044	0.0478347	0.036812	0.00184269	0.0074183	0.028094	FALSE	FALSE	FALSE	FALSE	FALSE	FALSE	FALSE	FALSE	FALSE	FALSE	FALSE	FALSE	FALSE	FALSE	FALSE	FALSE
YDR413C	FALSE	0.0150204	0.0165497	0.00253608	0.0406412	0.0262143	0.0390407	0.00471455	0.0228363	0.0495992	0.0186803	0.0903907	0.0509277	0.0186789	0.02679	0.044233	0.0336657	FALSE	FALSE	FALSE	FALSE	FALSE	FALSE	FALSE	FALSE	FALSE	FALSE	FALSE	FALSE	FALSE	FALSE	FALSE	FALSE
YDR329C	FALSE	0.0594036	0.0555985	0.0366924	0.0501569	0.0223749	0.00532983	0.00734454	0.00986556	0.0350765	0.0527017	0.0300473	0.0385086	0.0271556	0.0338697	0.0320074	0.0229748	FALSE	FALSE	FALSE	FALSE	FALSE	FALSE	FALSE	FALSE	FALSE	FALSE	FALSE	FALSE	FALSE	FALSE	FALSE	FALSE
YDL141W	FALSE	0.0626206	0.00728984	0.0140094	0.0210418	0.0172093	0.0558416	0.0362751	0.0250159	0.020299	0.00535199	0.00123586	0.0592284	0.0245011	0.0021538	0.0016464	0.0178558	FALSE	FALSE	FALSE	FALSE	FALSE	FALSE	FALSE	FALSE	FALSE	FALSE	FALSE	FALSE	FALSE	FALSE	FALSE	FALSE
YGL257C	FALSE	0.0728412	0.0258526	0.0384962	0.0126425	0.0232443	0.0476542	0.0375937	0.0966581	0.0699207	0.031876	0.00722269	0.0465196	0.0212191	0.0271894	0.0121583	0.011871	FALSE	FALSE	FALSE	FALSE	FALSE	FALSE	FALSE	FALSE	FALSE	FALSE	FALSE	FALSE	FALSE	FALSE	FALSE	FALSE
YMR238W	FALSE	0.0563927	0.0915552	0.142454	0.183131	0.14668	0.0779971	0.0181393	0.0392603	0.122538	0.18018	0.146289	0.103857	0.0907099	0.0877838	0.0233273	0.0158455	FALSE	FALSE	FALSE	FALSE	FALSE	FALSE	FALSE	FALSE	FALSE	FALSE	FALSE	FALSE	FALSE	FALSE	FALSE	FALSE
YMR130W	FALSE	0.0118145	0.00732211	0.0375289	0.0145044	0.00146811	0.00390954	0.0256747	0.00170918	0.0188756	0.020199	0.0127194	0.0289441	0.0057425	0.0164347	0.00269677	0.00679573	FALSE	FALSE	FALSE	FALSE	FALSE	FALSE	FALSE	FALSE	FALSE	FALSE	FALSE	FALSE	FALSE	FALSE	FALSE	FALSE
YLL034C	FALSE	0.00551419	0.0422974	0.0701132	0.0895016	0.0814043	0.0894317	0.0129669	0.0433229	0.0102825	0.0884804	0.00301868	0.0368053	0.0686315	0.0947746	0.0725283	0.0453513	FALSE	FALSE	FALSE	FALSE	FALSE	FALSE	FALSE	FALSE	FALSE	FALSE	FALSE	FALSE	FALSE	FALSE	FALSE	FALSE
YBR237W	FALSE	0.0720285	0.0473133	0.0381728	0.141168	0.0690152	0.026657	0.00220017	0.0755864	0.0754659	0.040828	0.0762773	0.0657759	0.0277367	0.0129088	0.0219968	0.0404147	FALSE	FALSE	FALSE	FALSE	FALSE	FALSE	FALSE	FALSE	FALSE	FALSE	FALSE	FALSE	FALSE	FALSE	FALSE	FALSE
YAL062W	FALSE	0.0218478	0.0304817	0.015664	0.0405329	0.0321041	0.0294128	0.00349333	0.043981	0.0296048	0.013132	0.0550962	0.0709018	0.00218192	0.0335605	0.0301238	0.0181836	FALSE	FALSE	FALSE	FALSE	FALSE	FALSE	FALSE	FALSE	FALSE	FALSE	FALSE	FALSE	FALSE	FALSE	FALSE	FALSE
YLR015W	FALSE	0.0146634	0.0142703	0.0215325	0.00739521	0.0612382	0.0250556	0.0266535	0.00357857	0.00443062	0.0185253	0.0615334	0.00764599	0.00199095	0.0153158	0.0510531	0.0119772	FALSE	FALSE	FALSE	FALSE	FALSE	FALSE	FALSE	FALSE	FALSE	FALSE	FALSE	FALSE	FALSE	FALSE	FALSE	FALSE
YOL023W	FALSE	0.0501716	0.0138598	0.0293254	0.00433615	0.00516461	0.0149506	0.032946	0.0468494	0.0517908	0.0809756	0.0133236	0.0163622	0.0595959	0.0333023	0.0608056	0.0120648	FALSE	FALSE	FALSE	FALSE	FALSE	FALSE	FALSE	FALSE	FALSE	FALSE	FALSE	FALSE	FALSE	FALSE	FALSE	FALSE
YOL021C	FALSE	0.0289755	0.0332126	0.0233155	0.0722405	0.105546	0.116366	0.073656	0.0226333	0.011574	0.0324033	0.0124329	0.0411476	0.0562416	0.0707617	0.0549288	0.0452509	FALSE	FALSE	FALSE	FALSE	FALSE	FALSE	FALSE	FALSE	FALSE	FALSE	FALSE	FALSE	FALSE	FALSE	FALSE	FALSE
YJR094C	FALSE	0.10864	0.0275572	0.0971791	0.0166665	0.051764	0.0632405	0.0863263	0.123598	0.0749507	0.0455751	0.0432305	0.00554667	0.0105689	0.0257934	0.0218196	0.0433157	FALSE	FALSE	FALSE	FALSE	FALSE	FALSE	FALSE	FALSE	FALSE	FALSE	FALSE	FALSE	FALSE	FALSE	FALSE	FALSE
YJL204C	FALSE	0.0236205	0.0181531	0.0229658	0.0801101	0.087935	0.136821	0.080206	0.0798115	0.0269318	0.0735688	0.0941362	0.0596912	0.06928	0.0261376	0.0437918	0.0180901	FALSE	FALSE	FALSE	FALSE	FALSE	FALSE	FALSE	FALSE	FALSE	FALSE	FALSE	FALSE	FALSE	FALSE	FALSE	FALSE
YGR215W	FALSE	0.0211388	0.0139424	0.0508754	0.0798485	0.0504188	0.0532083	0.0123186	0.0647706	0.0416042	0.106835	0.0489679	0.0542518	0.0191825	0.0107646	0.0227646	0.0499124	FALSE	FALSE	FALSE	FALSE	FALSE	FALSE	FALSE	FALSE	FALSE	FALSE	FALSE	FALSE	FALSE	FALSE	FALSE	FALSE
YOR022C	FALSE	0.0953941	0.0796263	0.0679829	0.0952489	0.0366973	0.00481631	0.0856122	0.037438	0.0735602	0.114379	0.122731	0.0296593	0.0026911	0.00918031	0.0196011	0.00247533	FALSE	FALSE	FALSE	FALSE	FALSE	FALSE	FALSE	FALSE	FALSE	FALSE	FALSE	FALSE	FALSE	FALSE	FALSE	FALSE
YLR363C	FALSE	0.00282637	0.0412437	0.0645159	0.0131044	0.0485911	0.0152574	0.043726	0.00693339	0.067683	0.0386672	0.0561031	0.00998777	0.0146332	0.0391096	0.0130486	0.0124574	FALSE	FALSE	FALSE	FALSE	FALSE	FALSE	FALSE	FALSE	FALSE	FALSE	FALSE	FALSE	FALSE	FALSE	FALSE	FALSE
YDR223W	FALSE	0.0929876	0.00422093	0.0441995	0.147035	0.0698366	0.0508348	0.0439959	0.0238759	0.00121234	0.0767167	0.00683336	0.0947738	0.0788524	0.0139336	0.044824	0.00370436	FALSE	FALSE	FALSE	FALSE	FALSE	FALSE	FALSE	FALSE	FALSE	FALSE	FALSE	FALSE	FALSE	FALSE	FALSE	FALSE
YKR008W	FALSE	0.119848	0.0413836	0.0313067	0.109394	0.119081	0.0992208	0.0192846	0.0120922	0.00479712	0.0479827	0.00818613	0.0722256	0.0486799	0.0142953	0.00150388	0.00816237	FALSE	FALSE	FALSE	FALSE	FALSE	FALSE	FALSE	FALSE	FALSE	FALSE	FALSE	FALSE	FALSE	FALSE	FALSE	FALSE
YLL024C	FALSE	0.0574289	0.0436978	0.0783384	0.0696847	0.0504234	0.0331613	0.00326877	0.0672625	0.0852773	0.113948	0.0727902	0.0515141	0.0201774	0.00950997	0.00431816	0.0229602	FALSE	FALSE	FALSE	FALSE	FALSE	FALSE	FALSE	FALSE	FALSE	FALSE	FALSE	FALSE	FALSE	FALSE	FALSE	FALSE
YBR279W	FALSE	0.0780533	0.0848913	0.0365664	0.0960116	0.00925072	0.0268208	0.0576807	0.0741481	0.0846867	0.0505078	0.073742	0.0554787	0.0184383	0.0195878	0.0290599	0.0462134	FALSE	FALSE	FALSE	FALSE	FALSE	FALSE	FALSE	FALSE	FALSE	FALSE	FALSE	FALSE	FALSE	FALSE	FALSE	FALSE
YLR353W	FALSE	0.188487	0.135236	0.0189385	0.00332094	0.0881216	0.153817	0.193684	0.238124	0.217174	0.181548	0.0246741	0.027264	0.113224	0.130036	0.100325	0.077957	FALSE	FALSE	FALSE	FALSE	FALSE	FALSE	FALSE	FALSE	FALSE	FALSE	FALSE	FALSE	FALSE	FALSE	FALSE	FALSE
YER068W	FALSE	0.00404958	0.0131914	0.0124848	0.03265	0.0466782	0.0425549	0.0374868	0.0292552	0.0185829	0.0157858	0.0478299	0.0177605	0.0190176	0.0139151	0.0124491	0.00510022	FALSE	FALSE	FALSE	FALSE	FALSE	FALSE	FALSE	FALSE	FALSE	FALSE	FALSE	FALSE	FALSE	FALSE	FALSE	FALSE
YER021W	FALSE	0.00864649	0.0316342	0.068724	0.0149133	0.0111934	0.0541043	0.0365224	0.00949675	0.0039204	0.0113751	0.0350467	0.0185336	0.031788	0.00792221	0.0199871	0.0167714	FALSE	FALSE	FALSE	FALSE	FALSE	FALSE	FALSE	FALSE	FALSE	FALSE	FALSE	FALSE	FALSE	FALSE	FALSE	FALSE
YIR015W	FALSE	0.0973659	0.0306901	0.0513621	0.0206871	0.0308634	0.0269493	0.0440174	0.0625473	0.0269976	0.0582366	0.0274222	0.101117	0.0317137	0.0125443	0.0183288	0.0221763	FALSE	FALSE	FALSE	FALSE	FALSE	FALSE	FALSE	FALSE	FALSE	FALSE	FALSE	FALSE	FALSE	FALSE	FALSE	FALSE
YJR060W	FALSE	0.0166198	0.0139216	0.0321931	0.0177246	0.0496635	0.0355363	0.0243554	0.0113231	0.0250926	0.0478714	0.0377857	0.00229595	0.0277249	0.0111741	0.0195914	0.0140707	FALSE	FALSE	FALSE	FALSE	FALSE	FALSE	FALSE	FALSE	FALSE	FALSE	FALSE	FALSE	FALSE	FALSE	FALSE	FALSE
YGL082W	FALSE	0.130779	0.0665348	0.022474	0.0306456	0.0410527	0.0463482	0.0696414	0.0602151	0.0289649	0.0275696	0.0168218	0.0366906	0.0124529	0.00599284	0.00799097	0.0143707	FALSE	FALSE	FALSE	FALSE	FALSE	FALSE	FALSE	FALSE	FALSE	FALSE	FALSE	FALSE	FALSE	FALSE	FALSE	FALSE
YMR136W	FALSE	0.246754	0.125573	0.177348	0.057171	0.010308	0.0331364	0.122264	0.111116	0.0981211	0.0539227	0.0356367	0.110375	0.208475	0.134752	0.135237	0.176869	FALSE	FALSE	FALSE	FALSE	FALSE	FALSE	FALSE	FALSE	FALSE	FALSE	FALSE	FALSE	FALSE	FALSE	FALSE	FALSE
YGR038C-A	FALSE	0.0234515	0.0101203	0.150238	0.0113107	0.0650735	0.0846667	0.0575695	0.0106557	0.042349	0.124437	0.0614715	0.199522	0.196641	0.0613648	0.0864467	0.0420804	FALSE	FALSE	FALSE	FALSE	FALSE	FALSE	FALSE	FALSE	FALSE	FALSE	FALSE	FALSE	FALSE	FALSE	FALSE	FALSE
YOR069W	FALSE	0.0430955	0.0603385	0.00260362	0.0657008	0.0140372	0.0470799	0.0383029	0.0269487	0.0708237	0.0175578	0.0203258	0.0463825	0.0262602	0.0121304	0.00660461	0.015806	FALSE	FALSE	FALSE	FALSE	FALSE	FALSE	FALSE	FALSE	FALSE	FALSE	FALSE	FALSE	FALSE	FALSE	FALSE	FALSE
YPL037C	FALSE	0.00373416	0.0107042	0.00384899	0.0332784	0.0703461	0.0503287	0.0354037	0.0297306	0.0370874	0.004424	0.0429063	0.0294309	0.0383959	0.0408396	0.0341891	0.0223735	FALSE	FALSE	FALSE	FALSE	FALSE	FALSE	FALSE	FALSE	FALSE	FALSE	FALSE	FALSE	FALSE	FALSE	FALSE	FALSE
YBR108W	FALSE	0.0435274	0.0254573	0.0331927	0.0329081	0.0652832	0.0710361	0.0298536	0.00862566	0.0870636	0.113737	0.0480996	0.0532053	0.0774774	0.037104	0.0189654	0.026378	FALSE	FALSE	FALSE	FALSE	FALSE	FALSE	FALSE	FALSE	FALSE	FALSE	FALSE	FALSE	FALSE	FALSE	FALSE	FALSE
YBR049C	FALSE	0.10121	0.0510886	0.0190574	0.0555464	0.104843	0.124162	0.0817753	0.0926683	0.0256756	0.032625	0.0228818	0.025198	0.0656391	0.0285905	0.0548622	0.00851481	FALSE	FALSE	FALSE	FALSE	FALSE	FALSE	FALSE	FALSE	FALSE	FALSE	FALSE	FALSE	FALSE	FALSE	FALSE	FALSE
YER019C-A	FALSE	0.0327106	0.0269458	0.0487643	0.0358615	0.0839576	0.0840469	0.0692729	0.0427312	0.142414	0.0595504	0.0954212	0.0435824	0.0561845	0.106587	0.126354	0.0242855	FALSE	FALSE	FALSE	FALSE	FALSE	FALSE	FALSE	FALSE	FALSE	FALSE	FALSE	FALSE	FALSE	FALSE	FALSE	FALSE
YMR308C	FALSE	0.0384648	0.0381449	0.0285653	0.0453026	0.0386825	0.0304229	0.00366872	0.0601847	0.0559085	0.0519954	0.0356307	0.0089005	0.0144941	0.0100015	0.0195217	0.00453505	FALSE	FALSE	FALSE	FALSE	FALSE	FALSE	FALSE	FALSE	FALSE	FALSE	FALSE	FALSE	FALSE	FALSE	FALSE	FALSE
YJR134C	FALSE	0.0278053	0.0224362	0.0167021	0.0188158	0.0138609	0.00495926	0.0441497	0.0200129	0.0264932	0.0103607	0.00863493	0.0196569	0.010562	0.00182321	0.0430763	0.014176	FALSE	FALSE	FALSE	FALSE	FALSE	FALSE	FALSE	FALSE	FALSE	FALSE	FALSE	FALSE	FALSE	FALSE	FALSE	FALSE
YLR399C	FALSE	0.064211	0.0730425	0.136623	0.170379	0.0780161	0.0366584	0.0195607	0.0397776	0.0558038	0.0669876	0.0847839	0.12435	0.0769202	0.0631493	0.0539672	0.0354282	FALSE	FALSE	FALSE	FALSE	FALSE	FALSE	FALSE	FALSE	FALSE	FALSE	FALSE	FALSE	FALSE	FALSE	FALSE	FALSE
YGL004C	FALSE	0.0150839	0.0387345	0.0208875	0.0556708	0.0170051	0.00119559	0.0179225	0.00788306	0.00195122	0.0111477	0.0483506	0.0381158	0.0269327	0.0666295	0.00908479	0.0114969	FALSE	FALSE	FALSE	FALSE	FALSE	FALSE	FALSE	FALSE	FALSE	FALSE	FALSE	FALSE	FALSE	FALSE	FALSE	FALSE
YMR194W	FALSE	0.00560062	0.00109023	0.0160446	0.0450668	0.130152	0.111132	0.0891212	0.0366631	0.0634698	0.0714409	0.0341388	0.0819681	0.0879888	0.0537566	0.117202	0.0678468	FALSE	FALSE	FALSE	FALSE	FALSE	FALSE	FALSE	FALSE	FALSE	FALSE	FALSE	FALSE	FALSE	FALSE	FALSE	FALSE
YDL040C	FALSE	0.00643555	0.00196783	0.00167245	0.00991941	0.00254006	0.00822729	0.00306653	0.0226933	0.0310326	0.0323255	0.027041	0.0121955	0.0336314	0.0270904	0.0106678	0.0131507	FALSE	FALSE	FALSE	FALSE	FALSE	FALSE	FALSE	FALSE	FALSE	FALSE	FALSE	FALSE	FALSE	FALSE	FALSE	FALSE
YOL107W	FALSE	0.0424831	0.00678341	0.0266336	0.0567459	0.0799501	0.0588133	0.00416777	0.00455264	0.00982446	0.0768951	0.0125485	0.0536585	0.0186051	0.00268658	0.0203727	0.00317707	FALSE	FALSE	FALSE	FALSE	FALSE	FALSE	FALSE	FALSE	FALSE	FALSE	FALSE	FALSE	FALSE	FALSE	FALSE	FALSE
YDR241W	FALSE	0.102474	0.0497781	0.0197339	0.00992591	0.0128672	0.0544244	0.0675266	0.0834778	0.123128	0.128522	0.281033	0.0754919	0.199952	0.0288211	0.0415223	0.0368106	FALSE	FALSE	FALSE	FALSE	FALSE	FALSE	FALSE	FALSE	FALSE	FALSE	TRUE	FALSE	FALSE	FALSE	FALSE	FALSE
YML016C	FALSE	0.0543389	0.0517458	0.0613579	0.0995656	0.0684374	0.0458483	0.0274955	0.0217934	0.00539647	0.0718618	0.0480672	0.0666263	0.0850965	0.0631416	0.0578606	0.0343053	FALSE	FALSE	FALSE	FALSE	FALSE	FALSE	FALSE	FALSE	FALSE	FALSE	FALSE	FALSE	FALSE	FALSE	FALSE	FALSE
YDR359C	FALSE	0.0220043	0.0287229	0.109263	0.0743967	0.0313906	0.116698	0.082033	0.106124	0.0723693	0.0840572	0.0428684	0.0122532	0.0350177	0.0259008	0.035865	0.0562249	FALSE	FALSE	FALSE	FALSE	FALSE	FALSE	FALSE	FALSE	FALSE	FALSE	FALSE	FALSE	FALSE	FALSE	FALSE	FALSE
YFL054C	FALSE	0.209301	0.190508	0.30793	0.264478	0.248072	0.173156	0.00967128	0.141169	0.196668	0.226575	0.114968	0.166652	0.198089	0.185596	0.1627	0.118033	FALSE	FALSE	TRUE	TRUE	FALSE	FALSE	FALSE	FALSE	FALSE	FALSE	FALSE	FALSE	FALSE	FALSE	FALSE	FALSE
YCR094W	FALSE	0.0016457	0.0213813	0.0452508	0.0724615	0.0324263	0.00459486	0.00652392	0.028021	0.0145771	0.0252141	0.00817508	0.0583736	0.0636241	0.00401704	0.0107172	0.0382568	FALSE	FALSE	FALSE	FALSE	FALSE	FALSE	FALSE	FALSE	FALSE	FALSE	FALSE	FALSE	FALSE	FALSE	FALSE	FALSE
YKL176C	FALSE	0.0127891	0.0172158	0.0312312	0.0589054	0.0113702	0.00506977	0.0134831	0.0158592	0.0240207	0.0244063	0.0106302	0.00686161	0.0150999	0.0432552	0.0291241	0.00641877	FALSE	FALSE	FALSE	FALSE	FALSE	FALSE	FALSE	FALSE	FALSE	FALSE	FALSE	FALSE	FALSE	FALSE	FALSE	FALSE
YHR205W	FALSE	0.0572596	0.0193101	0.0398804	0.0598035	0.114456	0.0874439	0.0705153	0.0557195	0.0224112	0.0143772	0.0504697	0.0642379	0.0666002	0.0710255	0.0387481	0.0286488	FALSE	FALSE	FALSE	FALSE	FALSE	FALSE	FALSE	FALSE	FALSE	FALSE	FALSE	FALSE	FALSE	FALSE	FALSE	FALSE
YLR438W	FALSE	0.0962987	0.00304083	0.0207478	0.146361	0.241532	0.267858	0.273511	0.258391	0.162332	0.0861865	0.179673	0.199747	0.171259	0.320018	0.235822	0.187738	FALSE	FALSE	FALSE	FALSE	FALSE	TRUE	TRUE	TRUE	FALSE	FALSE	FALSE	FALSE	FALSE	TRUE	FALSE	FALSE
YDR486C	FALSE	0.031254	0.0457234	0.0729021	0.0373695	0.067511	0.006615	0.00283524	0.0601967	0.0307633	0.0842882	0.0430312	0.0303644	0.0105092	0.0373795	0.00792803	0.0180555	FALSE	FALSE	FALSE	FALSE	FALSE	FALSE	FALSE	FALSE	FALSE	FALSE	FALSE	FALSE	FALSE	FALSE	FALSE	FALSE
YBL063W	FALSE	0.0208995	0.114548	0.200982	0.261172	0.240089	0.227828	0.170894	0.00708019	0.127306	0.276859	0.203626	0.241432	0.163706	0.128718	0.0738966	0.0445526	FALSE	FALSE	FALSE	TRUE	FALSE	FALSE	FALSE	FALSE	FALSE	TRUE	FALSE	FALSE	FALSE	FALSE	FALSE	FALSE
YOL012C	FALSE	0.13788	0.0142442	0.0709544	0.220911	0.156563	0.17974	0.157679	0.0759183	0.0743135	0.0601305	0.116019	0.157158	0.125264	0.098316	0.0127824	0.011689	FALSE	FALSE	FALSE	FALSE	FALSE	FALSE	FALSE	FALSE	FALSE	FALSE	FALSE	FALSE	FALSE	FALSE	FALSE	FALSE
YOR032C	FALSE	0.119642	0.0875257	0.00649125	0.00616241	0.0846624	0.0158392	0.00284672	0.0401752	0.104022	0.0500393	0.0530517	0.0290437	0.0563602	0.0107957	0.0827436	0.0326357	FALSE	FALSE	FALSE	FALSE	FALSE	FALSE	FALSE	FALSE	FALSE	FALSE	FALSE	FALSE	FALSE	FALSE	FALSE	FALSE
YOL126C	FALSE	0.210494	0.0975456	0.0140792	0.0995604	0.157136	0.16716	0.177702	0.194403	0.14987	0.0962586	0.0369435	0.052354	0.111671	0.109563	0.107686	0.177181	FALSE	FALSE	FALSE	FALSE	FALSE	FALSE	FALSE	FALSE	FALSE	FALSE	FALSE	FALSE	FALSE	FALSE	FALSE	FALSE
YDR372C	FALSE	0.0262151	0.00401851	0.0249709	0.0213991	0.0157165	0.00635025	0.0423464	0.0209184	0.0574736	0.0278998	0.039771	0.0182319	0.0138381	0.0393752	0.0212955	0.00894592	FALSE	FALSE	FALSE	FALSE	FALSE	FALSE	FALSE	FALSE	FALSE	FALSE	FALSE	FALSE	FALSE	FALSE	FALSE	FALSE
YOR056C	FALSE	0.0517843	0.0213442	0.101018	0.0731323	0.0782098	0.0681435	0.0760925	0.0579547	0.0312682	0.0311681	0.0458611	0.0132517	0.0955117	0.104934	0.0799861	0.0716084	FALSE	FALSE	FALSE	FALSE	FALSE	FALSE	FALSE	FALSE	FALSE	FALSE	FALSE	FALSE	FALSE	FALSE	FALSE	FALSE
YOR100C	FALSE	0.0934318	0.0374418	0.141739	0.0292414	0.0434299	0.0676378	0.127357	0.140958	0.0319347	0.0691662	0.0548587	0.0339402	0.00456818	0.0177554	0.122719	0.0735124	FALSE	FALSE	FALSE	FALSE	FALSE	FALSE	FALSE	FALSE	FALSE	FALSE	FALSE	FALSE	FALSE	FALSE	FALSE	FALSE
YKL054C	FALSE	0.00282161	0.0324464	0.0485521	0.0558881	0.0155281	0.0286347	0.00520343	0.00851167	0.00431818	0.0180148	0.0487066	0.0624579	0.029654	0.0173703	0.00381093	0.0360587	FALSE	FALSE	FALSE	FALSE	FALSE	FALSE	FALSE	FALSE	FALSE	FALSE	FALSE	FALSE	FALSE	FALSE	FALSE	FALSE
YCR035C	FALSE	0.0118462	0.0242782	0.00897224	0.00226196	0.0152263	0.039675	0.0388966	0.0325532	0.0143751	0.00176307	0.0476759	0.0116402	0.0448132	0.0141866	0.0341774	0.0514904	FALSE	FALSE	FALSE	FALSE	FALSE	FALSE	FALSE	FALSE	FALSE	FALSE	FALSE	FALSE	FALSE	FALSE	FALSE	FALSE
YOR134W	FALSE	0.265886	0.104482	0.049966	0.00423467	0.16853	0.22174	0.12648	0.059342	0.0847047	0.0512229	0.111922	0.0758295	0.0374944	0.0869704	0.0134276	0.109816	TRUE	FALSE	FALSE	FALSE	FALSE	FALSE	FALSE	FALSE	FALSE	FALSE	FALSE	FALSE	FALSE	FALSE	FALSE	FALSE
YOR203W	FALSE	0.267849	0.184375	0.187938	0.0505798	0.0831279	0.127402	0.16855	0.151297	0.17302	0.0765655	0.0506029	0.0617751	0.0559421	0.0300042	0.00332395	0.0581719	TRUE	FALSE	FALSE	FALSE	FALSE	FALSE	FALSE	FALSE	FALSE	FALSE	FALSE	FALSE	FALSE	FALSE	FALSE	FALSE
YDL143W	FALSE	0.0137636	0.0129774	0.0051541	0.0269649	0.0254516	0.00161784	0.00251795	0.0127546	0.0539435	0.0248434	0.0156937	0.0154852	0.0108921	0.0370132	0.0026079	0.0102006	FALSE	FALSE	FALSE	FALSE	FALSE	FALSE	FALSE	FALSE	FALSE	FALSE	FALSE	FALSE	FALSE	FALSE	FALSE	FALSE
YJR105W	FALSE	0.0405869	0.0326837	0.0168916	0.0203512	0.0380451	0.0570144	0.0312167	0.0270546	0.0211738	0.00704882	0.0177251	0.0116002	0.0223064	0.00404656	0.0255311	0.0243013	FALSE	FALSE	FALSE	FALSE	FALSE	FALSE	FALSE	FALSE	FALSE	FALSE	FALSE	FALSE	FALSE	FALSE	FALSE	FALSE
snR44	FALSE	0.0946051	0.00528902	0.00142387	0.0389774	0.0378113	0.0467976	0.0423075	0.0403019	0.146885	0.0156238	0.189928	0.00480887	0.0235644	0.0782547	0.109602	0.0192462	FALSE	FALSE	FALSE	FALSE	FALSE	FALSE	FALSE	FALSE	FALSE	FALSE	FALSE	FALSE	FALSE	FALSE	FALSE	FALSE
YMR260C	FALSE	0.0598705	0.0460019	0.0612229	0.0591785	0.0756943	0.0722281	0.0280545	0.0147376	0.0134097	0.048566	0.102843	0.0760234	0.0781944	0.0586928	0.0439132	0.00338965	FALSE	FALSE	FALSE	FALSE	FALSE	FALSE	FALSE	FALSE	FALSE	FALSE	FALSE	FALSE	FALSE	FALSE	FALSE	FALSE
YKL085W	FALSE	0.0734106	0.0367413	0.039905	0.0267194	0.00564383	0.0161093	0.048068	0.0490352	0.0581069	0.0608039	0.0247357	0.00361032	0.0039067	0.0127697	0.021056	0.0127335	FALSE	FALSE	FALSE	FALSE	FALSE	FALSE	FALSE	FALSE	FALSE	FALSE	FALSE	FALSE	FALSE	FALSE	FALSE	FALSE
YPL206C	FALSE	0.0110121	0.032057	0.0705753	0.0361804	0.0257503	0.00126922	0.00176871	0.0145127	0.00840411	0.0105302	0.0337715	0.00950811	0.0240851	0.0381132	0.031085	0.0355065	FALSE	FALSE	FALSE	FALSE	FALSE	FALSE	FALSE	FALSE	FALSE	FALSE	FALSE	FALSE	FALSE	FALSE	FALSE	FALSE
YLR086W	TRUE	0.053498	0.0187318	0.0847986	0.0398363	0.0857637	0.126117	0.0839548	0.109592	0.0411026	0.0112051	0.055328	0.0514057	0.0904373	0.0989314	0.0540479	0.096654	FALSE	FALSE	FALSE	FALSE	FALSE	FALSE	FALSE	FALSE	FALSE	FALSE	FALSE	FALSE	FALSE	FALSE	FALSE	FALSE
YDR519W	FALSE	0.0592656	0.0283596	0.0183354	0.0180393	0.0589206	0.0960121	0.0836068	0.0598163	0.0160122	0.0452778	0.0439322	0.0044528	0.0370137	0.0457238	0.0468985	0.0587409	FALSE	FALSE	FALSE	FALSE	FALSE	FALSE	FALSE	FALSE	FALSE	FALSE	FALSE	FALSE	FALSE	FALSE	FALSE	FALSE
YPR192W	FALSE	0.0755263	0.0295951	0.0676538	0.107559	0.0987208	0.0927506	0.0829092	0.0598139	0.0739525	0.158183	0.0574356	0.00612891	0.038782	0.00490678	0.0273623	0.0122982	FALSE	FALSE	FALSE	FALSE	FALSE	FALSE	FALSE	FALSE	FALSE	FALSE	FALSE	FALSE	FALSE	FALSE	FALSE	FALSE
YAR073W	FALSE	0.00868909	0.0168147	0.0578106	0.0819901	0.0840143	0.178797	0.139025	0.0409432	0.00685171	0.179584	0.130408	0.0785607	0.0492053	0.0390209	0.0550947	0.0372576	FALSE	FALSE	FALSE	FALSE	FALSE	FALSE	FALSE	FALSE	FALSE	FALSE	FALSE	FALSE	FALSE	FALSE	FALSE	FALSE
YIL005W	FALSE	0.00987427	0.00331855	0.0385075	0.00117845	0.0352209	0.0301705	0.0233231	0.0398816	0.059034	0.00948696	0.0260836	0.020214	0.0512598	0.0118814	0.0328194	0.0244171	FALSE	FALSE	FALSE	FALSE	FALSE	FALSE	FALSE	FALSE	FALSE	FALSE	FALSE	FALSE	FALSE	FALSE	FALSE	FALSE
YOL002C	FALSE	0.0861342	0.0685304	0.100762	0.0631047	0.060334	0.035307	0.0148685	0.0692192	0.0611972	0.0750477	0.0833402	0.0367532	0.0206432	0.0494064	0.0513077	0.00886488	FALSE	FALSE	FALSE	FALSE	FALSE	FALSE	FALSE	FALSE	FALSE	FALSE	FALSE	FALSE	FALSE	FALSE	FALSE	FALSE
YOR176W	FALSE	0.108774	0.13262	0.113789	0.0816624	0.00704819	0.0733723	0.096072	0.221085	0.202172	0.155063	0.086719	0.0330109	0.0602173	0.058071	0.0590972	0.0689548	FALSE	FALSE	FALSE	FALSE	FALSE	FALSE	FALSE	FALSE	FALSE	FALSE	FALSE	FALSE	FALSE	FALSE	FALSE	FALSE
YBR055C	FALSE	0.0070484	0.00391043	0.0144627	0.037298	0.0749307	0.0632484	0.0331652	0.0164237	0.025448	0.0626529	0.0585827	0.0352226	0.0539507	0.00146745	0.0192562	0.0208321	FALSE	FALSE	FALSE	FALSE	FALSE	FALSE	FALSE	FALSE	FALSE	FALSE	FALSE	FALSE	FALSE	FALSE	FALSE	FALSE
YJL025W	FALSE	0.0784808	0.0858917	0.127981	0.131951	0.105241	0.0839074	0.0264901	0.0535485	0.077248	0.119744	0.02846	0.0969912	0.0766626	0.0918405	0.0888662	0.0478674	FALSE	FALSE	FALSE	FALSE	FALSE	FALSE	FALSE	FALSE	FALSE	FALSE	FALSE	FALSE	FALSE	FALSE	FALSE	FALSE
YJR117W	FALSE	0.0111398	0.0141674	0.00385389	0.00968586	0.0160497	0.0363753	0.0430602	0.0385314	0.00487526	0.0233044	0.0112474	0.0204911	0.0205023	0.0505053	0.0485899	0.0160396	FALSE	FALSE	FALSE	FALSE	FALSE	FALSE	FALSE	FALSE	FALSE	FALSE	FALSE	FALSE	FALSE	FALSE	FALSE	FALSE
YGR119C	FALSE	0.0522494	0.0353919	0.00303793	0.00782949	0.0729678	0.0633709	0.0473102	0.0450484	0.0489423	0.0207151	0.0312275	0.0268147	0.0466459	0.00228627	0.0385185	0.0597779	FALSE	FALSE	FALSE	FALSE	FALSE	FALSE	FALSE	FALSE	FALSE	FALSE	FALSE	FALSE	FALSE	FALSE	FALSE	FALSE
YIL096C	FALSE	0.041553	0.0520997	0.0424152	0.0485944	0.0157373	0.0502436	0.0309228	0.018728	0.0411487	0.0140325	0.00771372	0.0132162	0.00512685	0.071329	0.040702	0.0718388	FALSE	FALSE	FALSE	FALSE	FALSE	FALSE	FALSE	FALSE	FALSE	FALSE	FALSE	FALSE	FALSE	FALSE	FALSE	FALSE
YJL144W	FALSE	0.0850594	0.100601	0.0800566	0.120192	0.0630709	0.0580033	0.0678197	0.0695644	0.328286	0.0420994	0.131824	0.0435479	0.0499556	0.0710263	0.00897313	0.0262997	FALSE	FALSE	FALSE	FALSE	FALSE	FALSE	FALSE	FALSE	TRUE	FALSE	FALSE	FALSE	FALSE	FALSE	FALSE	FALSE
YGR151C	FALSE	0.185435	0.144642	0.127858	0.0260388	0.126724	0.16341	0.246805	0.360391	0.305741	0.246109	0.105066	0.0453481	0.112637	0.184798	0.129364	0.0698464	FALSE	FALSE	FALSE	FALSE	FALSE	FALSE	FALSE	TRUE	TRUE	FALSE	FALSE	FALSE	FALSE	FALSE	FALSE	FALSE
YER136W	FALSE	0.0204646	0.0123032	0.0366769	0.0251179	0.0251209	0.033278	0.0175291	0.020857	0.0162908	0.0294855	0.0641861	0.00584692	0.020908	0.0171918	0.00904677	0.0564116	FALSE	FALSE	FALSE	FALSE	FALSE	FALSE	FALSE	FALSE	FALSE	FALSE	FALSE	FALSE	FALSE	FALSE	FALSE	FALSE
YLR105C	FALSE	0.0507511	0.00247207	0.0174997	0.014904	0.00846101	0.0150638	0.00656395	0.0698637	0.00497372	0.0124822	0.0549956	0.0416997	0.00596595	0.0105348	0.0128254	0.0242155	FALSE	FALSE	FALSE	FALSE	FALSE	FALSE	FALSE	FALSE	FALSE	FALSE	FALSE	FALSE	FALSE	FALSE	FALSE	FALSE
YJL145W	FALSE	0.0610581	0.0427652	0.0426313	0.0376707	0.0324879	0.0210734	0.020594	0.00840436	0.00217048	0.00735527	0.0482509	0.043957	0.0502348	0.0711995	0.0408938	0.00388042	FALSE	FALSE	FALSE	FALSE	FALSE	FALSE	FALSE	FALSE	FALSE	FALSE	FALSE	FALSE	FALSE	FALSE	FALSE	FALSE
YNL327W	FALSE	0.649572	0.566021	0.769447	0.822939	0.805265	0.899432	0.921018	0.952813	0.10221	0.909127	0.946751	0.961838	0.974763	0.874937	0.747343	0.665551	TRUE	TRUE	TRUE	TRUE	TRUE	TRUE	TRUE	TRUE	FALSE	TRUE	TRUE	TRUE	TRUE	TRUE	TRUE	TRUE
YKL044W	FALSE	0.108805	0.0557332	0.292594	0.0269688	0.0915018	0.196043	0.165687	0.202521	0.175912	0.126316	0.162003	0.101812	0.207635	0.171317	0.269684	0.154972	FALSE	FALSE	TRUE	FALSE	FALSE	FALSE	FALSE	FALSE	FALSE	FALSE	FALSE	FALSE	FALSE	FALSE	TRUE	FALSE
YNR066C	FALSE	0.00821084	0.00835383	0.0469369	0.0673153	0.0704698	0.105996	0.0203284	0.0236373	0.046227	0.0640506	0.0329476	0.024022	0.0566373	0.0504686	0.0585114	0.0691218	FALSE	FALSE	FALSE	FALSE	FALSE	FALSE	FALSE	FALSE	FALSE	FALSE	FALSE	FALSE	FALSE	FALSE	FALSE	FALSE
YIL097W	FALSE	0.0632542	0.112507	0.14053	0.157403	0.18489	0.0216577	0.00865188	0.0503994	0.175432	0.166134	0.0399292	0.0815187	0.11529	0.0952447	0.019872	0.0147627	FALSE	FALSE	FALSE	FALSE	FALSE	FALSE	FALSE	FALSE	FALSE	FALSE	FALSE	FALSE	FALSE	FALSE	FALSE	FALSE
YKL167C	FALSE	0.0426347	0.0763448	0.144566	0.0735286	0.0719723	0.0603825	0.00841909	0.00119789	0.0406049	0.00543353	0.199488	0.0250144	0.0489443	0.0832963	0.0373838	0.0354203	FALSE	FALSE	FALSE	FALSE	FALSE	FALSE	FALSE	FALSE	FALSE	FALSE	FALSE	FALSE	FALSE	FALSE	FALSE	FALSE
YOR223W	FALSE	0.125786	0.111121	0.0380756	0.0818249	0.0521552	0.0620097	0.0215953	0.0443	0.0492389	0.183331	0.0683823	0.0647348	0.0655512	0.0078037	0.0276905	0.0354945	FALSE	FALSE	FALSE	FALSE	FALSE	FALSE	FALSE	FALSE	FALSE	FALSE	FALSE	FALSE	FALSE	FALSE	FALSE	FALSE
YFR034C	TRUE	0.00657683	0.0023498	0.0411657	0.0949559	0.150795	0.116686	0.0875012	0.113253	0.0305979	0.0900313	0.0924135	0.0557395	0.0692476	0.146085	0.139013	0.111732	FALSE	FALSE	FALSE	FALSE	FALSE	FALSE	FALSE	FALSE	FALSE	FALSE	FALSE	FALSE	FALSE	FALSE	FALSE	FALSE
YER105C	FALSE	0.0314603	0.0218124	0.061374	0.0131347	0.0517351	0.0731866	0.0446089	0.00426674	0.00349382	0.0032838	0.025946	0.0163882	0.0238288	0.0231151	0.00841041	0.0106669	FALSE	FALSE	FALSE	FALSE	FALSE	FALSE	FALSE	FALSE	FALSE	FALSE	FALSE	FALSE	FALSE	FALSE	FALSE	FALSE
YJR027W	FALSE	0.0415582	0.0131597	0.0323645	0.00766747	0.0765015	0.00506793	0.0316997	0.125659	0.0157611	0.126718	0.154573	0.0783082	0.0269219	0.102884	0.0480178	0.0388213	FALSE	FALSE	FALSE	FALSE	FALSE	FALSE	FALSE	FALSE	FALSE	FALSE	FALSE	FALSE	FALSE	FALSE	FALSE	FALSE
YMR076C	FALSE	0.435925	0.364143	0.355167	0.187369	0.0587543	0.0912629	0.261606	0.498311	0.562086	0.551609	0.247453	0.028236	0.0767774	0.0786666	0.074974	0.085508	TRUE	TRUE	TRUE	FALSE	FALSE	FALSE	TRUE	TRUE	TRUE	TRUE	FALSE	FALSE	FALSE	FALSE	FALSE	FALSE
YPR105C	FALSE	0.207974	0.133855	0.0999565	0.00674946	0.0461782	0.0711714	0.0223908	0.0149234	0.0164268	0.0443275	0.0252517	0.0219594	0.10097	0.119603	0.0845581	0.11399	FALSE	FALSE	FALSE	FALSE	FALSE	FALSE	FALSE	FALSE	FALSE	FALSE	FALSE	FALSE	FALSE	FALSE	FALSE	FALSE
YAL064W	FALSE	0.128509	0.11188	0.062995	0.283505	0.182132	0.22219	0.0729331	0.201238	0.0697821	0.133677	0.0481015	0.184374	0.0223277	0.101419	0.0460339	0.124075	FALSE	FALSE	FALSE	TRUE	FALSE	FALSE	FALSE	FALSE	FALSE	FALSE	FALSE	FALSE	FALSE	FALSE	FALSE	FALSE
YNR064C	FALSE	0.12184	0.0687671	0.122387	0.0466329	0.00409862	0.00921932	0.01172	0.0126657	0.0159518	0.0457152	0.0779942	0.0679696	0.0149032	0.0454885	0.0447255	0.0873783	FALSE	FALSE	FALSE	FALSE	FALSE	FALSE	FALSE	FALSE	FALSE	FALSE	FALSE	FALSE	FALSE	FALSE	FALSE	FALSE
YDL168W	FALSE	0.0643587	0.009702	0.0878838	0.155594	0.169039	0.138247	0.0882288	0.0343713	0.0146613	0.0544705	0.084583	0.0631695	0.101823	0.0785824	0.0776529	0.085974	FALSE	FALSE	FALSE	FALSE	FALSE	FALSE	FALSE	FALSE	FALSE	FALSE	FALSE	FALSE	FALSE	FALSE	FALSE	FALSE
YCL056C	FALSE	0.0736329	0.0629354	0.0305192	0.0328373	0.0559621	0.0753233	0.115555	0.0503536	0.0813167	0.00393726	0.129886	0.0404602	0.0638895	0.128899	0.0956913	0.0782994	FALSE	FALSE	FALSE	FALSE	FALSE	FALSE	FALSE	FALSE	FALSE	FALSE	FALSE	FALSE	FALSE	FALSE	FALSE	FALSE
YML022W	FALSE	0.0145625	0.0223684	0.00999048	0.0137152	0.00507274	0.0167888	0.00893428	0.0314263	0.011376	0.0114867	0.0156908	0.0185361	0.0231183	0.0158951	0.0131673	0.00963941	FALSE	FALSE	FALSE	FALSE	FALSE	FALSE	FALSE	FALSE	FALSE	FALSE	FALSE	FALSE	FALSE	FALSE	FALSE	FALSE
YOR011W	FALSE	0.0884282	0.0599104	0.0119184	0.054719	0.105854	0.199698	0.152093	0.0753083	0.0680566	0.00468118	0.0554677	0.0308982	0.0704137	0.0738484	0.0943959	0.0786848	FALSE	FALSE	FALSE	FALSE	FALSE	FALSE	FALSE	FALSE	FALSE	FALSE	FALSE	FALSE	FALSE	FALSE	FALSE	FALSE
YOR278W	FALSE	0.0139911	0.0279956	0.0456963	0.0107828	0.0462098	0.0590157	0.0697104	0.027642	0.0249388	0.00881354	0.159987	0.0366224	0.0251032	0.0431569	0.00732971	0.0289945	FALSE	FALSE	FALSE	FALSE	FALSE	FALSE	FALSE	FALSE	FALSE	FALSE	FALSE	FALSE	FALSE	FALSE	FALSE	FALSE
YPR008W	FALSE	0.0385609	0.0810748	0.129244	0.115951	0.0845965	0.0750329	0.0352979	0.0597577	0.117131	0.101347	0.0738232	0.0903428	0.0768816	0.0625036	0.041127	0.0142833	FALSE	FALSE	FALSE	FALSE	FALSE	FALSE	FALSE	FALSE	FALSE	FALSE	FALSE	FALSE	FALSE	FALSE	FALSE	FALSE
YIR023W	FALSE	0.111605	0.047258	0.0328093	0.047854	0.0929383	0.111605	0.0979549	0.0685326	0.0533181	0.0242208	0.00483005	0.046334	0.0608815	0.0768388	0.0169432	0.0329034	FALSE	FALSE	FALSE	FALSE	FALSE	FALSE	FALSE	FALSE	FALSE	FALSE	FALSE	FALSE	FALSE	FALSE	FALSE	FALSE
YKR080W	FALSE	0.146478	0.1787	0.191353	0.104368	0.027478	0.0412015	0.045692	0.059148	0.113526	0.0733767	0.0460538	0.0821525	0.0951632	0.0425207	0.0603425	0.0890284	FALSE	FALSE	FALSE	FALSE	FALSE	FALSE	FALSE	FALSE	FALSE	FALSE	FALSE	FALSE	FALSE	FALSE	FALSE	FALSE
YBR010W	FALSE	0.0272899	0.332009	0.527206	0.463348	0.214896	0.0344353	0.066111	0.239701	0.368497	0.448567	0.458981	0.381564	0.218182	0.071526	0.133707	0.257267	FALSE	TRUE	TRUE	TRUE	FALSE	FALSE	FALSE	FALSE	TRUE	TRUE	TRUE	TRUE	FALSE	FALSE	FALSE	TRUE
YBL008W	FALSE	0.0853548	0.0735702	0.0455056	0.0530106	0.0499433	0.0117841	0.0270277	0.0604546	0.0460753	0.053358	0.0602759	0.0271301	0.0146047	0.0411758	0.0180614	0.0298362	FALSE	FALSE	FALSE	FALSE	FALSE	FALSE	FALSE	FALSE	FALSE	FALSE	FALSE	FALSE	FALSE	FALSE	FALSE	FALSE
YLR318W	FALSE	0.101424	0.0350399	0.0824082	0.0658893	0.0351442	0.0488219	0.0506052	0.00110294	0.0226349	0.0209893	0.0690291	0.0726753	0.0353528	0.0563461	0.0806928	0.0607002	FALSE	FALSE	FALSE	FALSE	FALSE	FALSE	FALSE	FALSE	FALSE	FALSE	FALSE	FALSE	FALSE	FALSE	FALSE	FALSE
YER053C-A	FALSE	0.0368084	0.110182	0.310175	0.233184	0.170068	0.101851	0.0851313	0.246914	0.161434	0.445263	0.0343067	0.150767	0.119057	0.0919396	0.00939291	0.0137244	FALSE	FALSE	TRUE	FALSE	FALSE	FALSE	FALSE	FALSE	FALSE	TRUE	FALSE	FALSE	FALSE	FALSE	FALSE	FALSE
YKR056W	FALSE	0.0245644	0.044559	0.117273	0.0854234	0.0890947	0.102326	0.0772209	0.0195741	0.00739635	0.0511745	0.087534	0.0498779	0.0727493	0.103587	0.0939717	0.0764974	FALSE	FALSE	FALSE	FALSE	FALSE	FALSE	FALSE	FALSE	FALSE	FALSE	FALSE	FALSE	FALSE	FALSE	FALSE	FALSE
YGR250C	FALSE	0.0185877	0.0354725	0.0198199	0.0157306	0.0306927	0.0478807	0.0116135	0.0115633	0.066704	0.00402586	0.00522304	0.0181438	0.00139111	0.0307377	0.036772	0.0275819	FALSE	FALSE	FALSE	FALSE	FALSE	FALSE	FALSE	FALSE	FALSE	FALSE	FALSE	FALSE	FALSE	FALSE	FALSE	FALSE
YLR283W	FALSE	0.0378621	0.0310657	0.0625745	0.0697742	0.0760749	0.0567371	0.0356751	0.00556961	0.0106099	0.0416681	0.0824997	0.0241473	0.0618607	0.0581122	0.0092754	0.0199643	FALSE	FALSE	FALSE	FALSE	FALSE	FALSE	FALSE	FALSE	FALSE	FALSE	FALSE	FALSE	FALSE	FALSE	FALSE	FALSE
YKL032C	FALSE	0.133029	0.0549889	0.0116324	0.0724233	0.125486	0.173847	0.13204	0.0822956	0.0109545	0.032714	0.0290834	0.0599722	0.0423649	0.0520509	0.0368105	0.0595168	FALSE	FALSE	FALSE	FALSE	FALSE	FALSE	FALSE	FALSE	FALSE	FALSE	FALSE	FALSE	FALSE	FALSE	FALSE	FALSE
YCL009C	FALSE	0.194299	0.165355	0.1826	0.135485	0.0800143	0.0177423	0.0231067	0.0468288	0.109157	0.0754782	0.165228	0.11115	0.0598202	0.148595	0.0802124	0.0377909	FALSE	FALSE	FALSE	FALSE	FALSE	FALSE	FALSE	FALSE	FALSE	FALSE	FALSE	FALSE	FALSE	FALSE	FALSE	FALSE
YBR009C	FALSE	0.118518	0.29945	0.598723	0.569626	0.308916	0.1425	0.00135032	0.203781	0.450558	0.520258	0.545788	0.489296	0.295229	0.00132753	0.203363	0.264892	FALSE	TRUE	TRUE	TRUE	TRUE	FALSE	FALSE	FALSE	TRUE	TRUE	TRUE	TRUE	TRUE	FALSE	FALSE	TRUE
YPL025C	FALSE	0.171558	0.0293382	0.148916	0.198524	0.158732	0.143272	0.00358042	0.0396445	0.146247	0.150275	0.123428	0.116682	0.218874	0.00670163	0.0837712	0.164797	FALSE	FALSE	FALSE	FALSE	FALSE	FALSE	FALSE	FALSE	FALSE	FALSE	FALSE	FALSE	FALSE	FALSE	FALSE	FALSE
YJR010C-A	FALSE	0.00428323	0.0130872	0.0579153	0.0412859	0.0280888	0.0455607	0.0533476	0.128823	0.127629	0.00800804	0.0576741	0.0483048	0.0284274	0.0821458	0.117558	0.0728043	FALSE	FALSE	FALSE	FALSE	FALSE	FALSE	FALSE	FALSE	FALSE	FALSE	FALSE	FALSE	FALSE	FALSE	FALSE	FALSE
YNL284C-B	FALSE	0.070971	0.0246209	0.0256507	0.0670482	0.040781	0.00206861	0.056317	0.0107882	0.00180107	0.00393192	0.0181559	0.0308424	0.0156068	0.0468142	0.016807	0.0692726	FALSE	FALSE	FALSE	FALSE	FALSE	FALSE	FALSE	FALSE	FALSE	FALSE	FALSE	FALSE	FALSE	FALSE	FALSE	FALSE
YDR471W	FALSE	0.00876564	0.0218685	0.0178325	0.033244	0.0798298	0.046712	0.0151819	0.0235676	0.0440783	0.0365959	0.0501	0.02934	0.0469733	0.0301907	0.0161728	0.0179702	FALSE	FALSE	FALSE	FALSE	FALSE	FALSE	FALSE	FALSE	FALSE	FALSE	FALSE	FALSE	FALSE	FALSE	FALSE	FALSE
YLR128W	FALSE	0.0198602	0.00481075	0.0036062	0.0380258	0.00786114	0.00697914	0.0121879	0.0426743	0.0327088	0.0714311	0.0978159	0.0549735	0.0325942	0.0787706	0.0753296	0.0320392	FALSE	FALSE	FALSE	FALSE	FALSE	FALSE	FALSE	FALSE	FALSE	FALSE	FALSE	FALSE	FALSE	FALSE	FALSE	FALSE
YGR188C	TRUE	0.195397	0.196983	0.296319	0.277042	0.183672	0.0796671	0.00124274	0.216543	0.352901	0.439672	0.168987	0.187419	0.107157	0.0716459	0.0382237	0.0323043	FALSE	FALSE	TRUE	TRUE	FALSE	FALSE	FALSE	FALSE	TRUE	TRUE	FALSE	FALSE	FALSE	FALSE	FALSE	FALSE
YDL128W	FALSE	0.02301	0.0596377	0.127407	0.113256	0.106212	0.0991598	0.0629127	0.0153901	0.0479324	0.117065	0.114768	0.110063	0.0908234	0.0663681	0.0711358	0.00762152	FALSE	FALSE	FALSE	FALSE	FALSE	FALSE	FALSE	FALSE	FALSE	FALSE	FALSE	FALSE	FALSE	FALSE	FALSE	FALSE
YBR258C	FALSE	0.0196563	0.0110178	0.0158188	0.0884691	0.120674	0.110708	0.0798202	0.00885177	0.00517791	0.0784111	0.127193	0.0738485	0.066937	0.0586062	0.00131712	0.0221902	FALSE	FALSE	FALSE	FALSE	FALSE	FALSE	FALSE	FALSE	FALSE	FALSE	FALSE	FALSE	FALSE	FALSE	FALSE	FALSE
YBR186W	FALSE	0.064417	0.0420047	0.119249	0.113025	0.0434141	0.0102851	0.00403395	0.0532674	0.0882471	0.0966949	0.0552103	0.111106	0.0780591	0.0375581	0.011796	0.00459135	FALSE	FALSE	FALSE	FALSE	FALSE	FALSE	FALSE	FALSE	FALSE	FALSE	FALSE	FALSE	FALSE	FALSE	FALSE	FALSE
YOL073C	FALSE	0.0516032	0.0394518	0.0576445	0.0534419	0.0257721	0.0217156	0.0312868	0.0609633	0.0698345	0.0541719	0.00700644	0.0314166	0.0426343	0.00247897	0.0373007	0.0058363	FALSE	FALSE	FALSE	FALSE	FALSE	FALSE	FALSE	FALSE	FALSE	FALSE	FALSE	FALSE	FALSE	FALSE	FALSE	FALSE
YGL246C	FALSE	0.0206107	0.0141973	0.0469025	0.0139715	0.0165989	0.0131944	0.0232496	0.00697212	0.0041914	0.00881583	0.0432855	0.0378705	0.0293823	0.0030567	0.0295179	0.051904	FALSE	FALSE	FALSE	FALSE	FALSE	FALSE	FALSE	FALSE	FALSE	FALSE	FALSE	FALSE	FALSE	FALSE	FALSE	FALSE
YLR270W	FALSE	0.0270795	0.071117	0.181188	0.145799	0.0940245	0.0319441	0.0202322	0.0158896	0.0398637	0.0684252	0.0225898	0.0534584	0.0896996	0.0879717	0.0121738	0.0935631	FALSE	FALSE	FALSE	FALSE	FALSE	FALSE	FALSE	FALSE	FALSE	FALSE	FALSE	FALSE	FALSE	FALSE	FALSE	FALSE
YJR031C	FALSE	0.041984	0.0677364	0.151786	0.146824	0.11498	0.116042	0.112637	0.0415707	0.0239276	0.104703	0.142848	0.128908	0.136534	0.0751579	0.0484233	0.025835	FALSE	FALSE	FALSE	FALSE	FALSE	FALSE	FALSE	FALSE	FALSE	FALSE	FALSE	FALSE	FALSE	FALSE	FALSE	FALSE
YMR288W	FALSE	0.0294259	0.0328485	0.0130352	0.0140889	0.0159599	0.00978425	0.0293827	0.0425363	0.019021	0.0310449	0.045356	0.0226437	0.0101974	0.0200082	0.02275	0.0110626	FALSE	FALSE	FALSE	FALSE	FALSE	FALSE	FALSE	FALSE	FALSE	FALSE	FALSE	FALSE	FALSE	FALSE	FALSE	FALSE
YBR192W	FALSE	0.0498922	0.0213205	0.0173298	0.0477783	0.0148187	0.0144953	0.0174403	0.0552591	0.0214126	0.0189849	0.0228407	0.0127168	0.0224446	0.00356618	0.0065101	0.0191777	FALSE	FALSE	FALSE	FALSE	FALSE	FALSE	FALSE	FALSE	FALSE	FALSE	FALSE	FALSE	FALSE	FALSE	FALSE	FALSE
YML007W	FALSE	0.0045935	0.0491601	0.0485303	0.0571457	0.014232	0.0165427	0.02743	0.0311362	0.0416768	0.035372	0.0211655	0.0549486	0.0136679	0.0103794	0.0283002	0.020086	FALSE	FALSE	FALSE	FALSE	FALSE	FALSE	FALSE	FALSE	FALSE	FALSE	FALSE	FALSE	FALSE	FALSE	FALSE	FALSE
YGR045C	FALSE	0.0217129	0.0400634	0.108093	0.207002	0.0859515	0.16161	0.109208	0.112165	0.0512706	0.153894	0.110673	0.0947765	0.1328	0.0712134	0.0788184	0.0201633	FALSE	FALSE	FALSE	FALSE	FALSE	FALSE	FALSE	FALSE	FALSE	FALSE	FALSE	FALSE	FALSE	FALSE	FALSE	FALSE
YMR195W	FALSE	0.0655742	0.0561002	0.0850991	0.109254	0.1212	0.0448033	0.101034	0.106868	0.166898	0.108751	0.0303172	0.126906	0.185379	0.177753	0.182181	0.13285	FALSE	FALSE	FALSE	FALSE	FALSE	FALSE	FALSE	FALSE	FALSE	FALSE	FALSE	FALSE	FALSE	FALSE	FALSE	FALSE
YHR116W	FALSE	0.071225	0.0383588	0.0733694	0.100916	0.101465	0.062993	0.0356567	0.0195342	0.00463697	0.074416	0.153798	0.127877	0.109824	0.0437112	0.0372216	0.0303888	FALSE	FALSE	FALSE	FALSE	FALSE	FALSE	FALSE	FALSE	FALSE	FALSE	FALSE	FALSE	FALSE	FALSE	FALSE	FALSE
YIL141W	FALSE	0.336697	0.272622	0.123516	0.182843	0.0612536	0.00245231	0.352953	0.701882	0.99147	0.379695	0.0366573	0.0598931	0.104173	0.324334	0.305636	0.177213	TRUE	TRUE	FALSE	FALSE	FALSE	FALSE	TRUE	TRUE	TRUE	TRUE	FALSE	FALSE	FALSE	TRUE	TRUE	FALSE
YDR139C	FALSE	0.0143963	0.028984	0.00209751	0.0535116	0.111422	0.111548	0.070457	0.00238538	0.0992764	0.0136456	0.131985	0.0581608	0.0415485	0.0994677	0.078091	0.0447124	FALSE	FALSE	FALSE	FALSE	FALSE	FALSE	FALSE	FALSE	FALSE	FALSE	FALSE	FALSE	FALSE	FALSE	FALSE	FALSE
YPL096W	FALSE	0.0697987	0.0216465	0.0598735	0.0990654	0.0598224	0.0723708	0.00264169	0.0182419	0.0197205	0.0111546	0.106093	0.0522001	0.0417079	0.0491777	0.0591582	0.0258468	FALSE	FALSE	FALSE	FALSE	FALSE	FALSE	FALSE	FALSE	FALSE	FALSE	FALSE	FALSE	FALSE	FALSE	FALSE	FALSE
YBL077W	FALSE	0.0337938	0.0152376	0.00123927	0.0394851	0.0514204	0.0662359	0.0413471	0.0044186	0.00330987	0.0511199	0.00141761	0.0134806	0.0417781	0.04117	0.0163573	0.0536026	FALSE	FALSE	FALSE	FALSE	FALSE	FALSE	FALSE	FALSE	FALSE	FALSE	FALSE	FALSE	FALSE	FALSE	FALSE	FALSE
YLR298C	FALSE	0.0149208	0.0514306	0.0286906	0.0550539	0.0507195	0.054369	0.0531394	0.073898	0.0405684	0.0284663	0.101118	0.0302904	0.0571638	0.0117571	0.0585114	0.0432091	FALSE	FALSE	FALSE	FALSE	FALSE	FALSE	FALSE	FALSE	FALSE	FALSE	FALSE	FALSE	FALSE	FALSE	FALSE	FALSE
YJL216C	FALSE	0.0394986	0.0688705	0.0330199	0.00162954	0.00747704	0.0635818	0.0417311	0.0196613	0.00926554	0.0917066	0.0421695	0.0201471	0.00720646	0.0268256	0.0549278	0.0035814	FALSE	FALSE	FALSE	FALSE	FALSE	FALSE	FALSE	FALSE	FALSE	FALSE	FALSE	FALSE	FALSE	FALSE	FALSE	FALSE
YDR516C	FALSE	0.0782937	0.204587	0.376318	0.333661	0.33947	0.246375	0.0953051	0.0107412	0.123295	0.196285	0.0864367	0.197617	0.283164	0.26292	0.253569	0.266092	FALSE	FALSE	TRUE	TRUE	TRUE	FALSE	FALSE	FALSE	FALSE	FALSE	FALSE	FALSE	TRUE	TRUE	TRUE	TRUE
YLL061W	FALSE	0.175615	0.049651	0.15529	0.292878	0.263321	0.169847	0.0922339	0.0364636	0.00521915	0.0341951	0.0765451	0.071521	0.113977	0.168526	0.141818	0.0912219	FALSE	FALSE	FALSE	TRUE	TRUE	FALSE	FALSE	FALSE	FALSE	FALSE	FALSE	FALSE	FALSE	FALSE	FALSE	FALSE
YLR215C	FALSE	0.0452105	0.0687281	0.0686799	0.0598367	0.0548424	0.0708839	0.0252247	0.00902616	0.0351894	0.0392688	0.0632637	0.0150449	0.0961578	0.103681	0.0803012	0.0331657	FALSE	FALSE	FALSE	FALSE	FALSE	FALSE	FALSE	FALSE	FALSE	FALSE	FALSE	FALSE	FALSE	FALSE	FALSE	FALSE
YBL087C	FALSE	0.0285733	0.0128324	0.00627154	0.0202106	0.0171608	0.0206408	0.0148559	0.00335465	0.00122527	0.020341	0.0682523	0.0283189	0.0386311	0.0305114	0.0169725	0.0433961	FALSE	FALSE	FALSE	FALSE	FALSE	FALSE	FALSE	FALSE	FALSE	FALSE	FALSE	FALSE	FALSE	FALSE	FALSE	FALSE
YOL018C	FALSE	0.00505253	0.0328458	0.0377096	0.040493	0.0423035	0.0575954	0.0497354	0.0249282	0.00177169	0.00133055	0.0101578	0.0495257	0.0411131	0.0639892	0.045597	0.0059526	FALSE	FALSE	FALSE	FALSE	FALSE	FALSE	FALSE	FALSE	FALSE	FALSE	FALSE	FALSE	FALSE	FALSE	FALSE	FALSE
YMR225C	FALSE	0.066336	0.00112591	0.0125046	0.07947	0.139063	0.138012	0.110407	0.0274218	0.00335987	0.0748989	0.142683	0.0550231	0.0346165	0.0265835	0.0840245	0.0142746	FALSE	FALSE	FALSE	FALSE	FALSE	FALSE	FALSE	FALSE	FALSE	FALSE	FALSE	FALSE	FALSE	FALSE	FALSE	FALSE
YMR262W	FALSE	0.0261378	0.0619062	0.0431951	0.156624	0.207272	0.0932908	0.132312	0.124463	0.015665	0.106317	0.072409	0.0678431	0.104298	0.188786	0.113006	0.0917126	FALSE	FALSE	FALSE	FALSE	FALSE	FALSE	FALSE	FALSE	FALSE	FALSE	FALSE	FALSE	FALSE	FALSE	FALSE	FALSE
YJL206C	FALSE	0.0844505	0.0177561	0.0553467	0.0335828	0.0309249	0.0538118	0.0196074	0.0784633	0.0312101	0.0166928	0.108904	0.0509131	0.00155882	0.0417043	0.00809282	0.029642	FALSE	FALSE	FALSE	FALSE	FALSE	FALSE	FALSE	FALSE	FALSE	FALSE	FALSE	FALSE	FALSE	FALSE	FALSE	FALSE
YNL160W	FALSE	0.228092	0.348244	0.694293	0.789802	0.774249	0.515005	0.0477736	0.564637	0.750565	0.800806	0.6405	0.415841	0.28887	0.20441	0.091141	0.0577237	FALSE	TRUE	TRUE	TRUE	TRUE	TRUE	FALSE	TRUE	TRUE	TRUE	TRUE	TRUE	TRUE	FALSE	FALSE	FALSE
YBR061C	FALSE	0.0318221	0.0496128	0.0928697	0.0851092	0.0514889	0.0672056	0.0737545	0.023977	0.0191035	0.0483017	0.0264333	0.0746766	0.0911564	0.0636736	0.077466	0.0601611	FALSE	FALSE	FALSE	FALSE	FALSE	FALSE	FALSE	FALSE	FALSE	FALSE	FALSE	FALSE	FALSE	FALSE	FALSE	FALSE
YKR062W	FALSE	0.0417559	0.0431962	0.0523593	0.0404971	0.0690655	0.0350532	0.0283698	0.0714427	0.0657026	0.0483365	0.100003	0.0326675	0.0158267	0.0452136	0.00646621	0.0329194	FALSE	FALSE	FALSE	FALSE	FALSE	FALSE	FALSE	FALSE	FALSE	FALSE	FALSE	FALSE	FALSE	FALSE	FALSE	FALSE
YKR051W	FALSE	0.0998365	0.0709755	0.00820852	0.00162579	0.0470937	0.0155651	0.0328095	0.0566699	0.0698436	0.00586484	0.0539316	0.0216056	0.0431138	0.0298934	0.00294476	0.013728	FALSE	FALSE	FALSE	FALSE	FALSE	FALSE	FALSE	FALSE	FALSE	FALSE	FALSE	FALSE	FALSE	FALSE	FALSE	FALSE
YDL237W	FALSE	0.0853085	0.048978	0.011518	0.0334822	0.0833361	0.114911	0.125421	0.112621	0.00585226	0.0168105	0.0198002	0.0327852	0.0403173	0.0676688	0.0688455	0.0441153	FALSE	FALSE	FALSE	FALSE	FALSE	FALSE	FALSE	FALSE	FALSE	FALSE	FALSE	FALSE	FALSE	FALSE	FALSE	FALSE
YJL052W	FALSE	0.645741	0.493654	0.480252	0.226205	0.00988961	0.186241	0.190527	0.226176	0.224187	0.322847	0.253334	0.173379	0.173633	0.171587	0.139151	0.134226	TRUE	TRUE	TRUE	FALSE	FALSE	FALSE	FALSE	FALSE	FALSE	TRUE	TRUE	FALSE	FALSE	FALSE	FALSE	FALSE
YAR020C	FALSE	0.108413	0.00369119	0.0464986	0.00611956	0.0950984	0.00750952	0.0370791	0.0416986	0.0820492	0.117828	0.0158571	0.0197013	0.0742485	0.0417152	0.029375	0.0984082	FALSE	FALSE	FALSE	FALSE	FALSE	FALSE	FALSE	FALSE	FALSE	FALSE	FALSE	FALSE	FALSE	FALSE	FALSE	FALSE
YDR496C	FALSE	0.0188205	0.0204295	0.0138759	0.0223363	0.0197761	0.0272851	0.0136143	0.0228341	0.02842	0.00933816	0.0193954	0.00552511	0.00849194	0.0432017	0.0555318	0.0490627	FALSE	FALSE	FALSE	FALSE	FALSE	FALSE	FALSE	FALSE	FALSE	FALSE	FALSE	FALSE	FALSE	FALSE	FALSE	FALSE
YKL221W	FALSE	0.158477	0.0306342	0.118367	0.14677	0.141886	0.0942264	0.342265	0.235913	0.10684	0.0761634	0.0983874	0.165624	0.260119	0.0930693	0.128316	0.0767636	FALSE	FALSE	FALSE	FALSE	FALSE	FALSE	TRUE	FALSE	FALSE	FALSE	FALSE	FALSE	TRUE	FALSE	FALSE	FALSE
YNL314W	FALSE	0.0218619	0.00324075	0.00446936	0.0458729	0.0544239	0.0148617	0.00927509	0.0525862	0.0282488	0.0538289	0.0396383	0.0160306	0.0284737	0.0180361	0.00763064	0.0142086	FALSE	FALSE	FALSE	FALSE	FALSE	FALSE	FALSE	FALSE	FALSE	FALSE	FALSE	FALSE	FALSE	FALSE	FALSE	FALSE
YER176W	FALSE	0.00158854	0.0160664	0.0493006	0.0651843	0.00656256	0.0278431	0.0092486	0.0446771	0.0469504	0.0115594	0.0355953	0.0283205	0.0174051	0.00592393	0.0178391	0.0272646	FALSE	FALSE	FALSE	FALSE	FALSE	FALSE	FALSE	FALSE	FALSE	FALSE	FALSE	FALSE	FALSE	FALSE	FALSE	FALSE
YGL125W	FALSE	0.00844492	0.0166307	0.0135222	0.123788	0.101056	0.0336039	0.0312195	0.0599008	0.0323764	0.0397207	0.0569125	0.0419963	0.021539	0.0256482	0.0325151	0.0158853	FALSE	FALSE	FALSE	FALSE	FALSE	FALSE	FALSE	FALSE	FALSE	FALSE	FALSE	FALSE	FALSE	FALSE	FALSE	FALSE
YKL086W	FALSE	0.166719	0.168566	0.152576	0.156296	0.0906252	0.29468	0.296982	0.263237	0.0482918	0.478769	0.0466329	0.245319	0.13128	0.298689	0.206457	0.224106	FALSE	FALSE	FALSE	FALSE	FALSE	TRUE	TRUE	TRUE	FALSE	TRUE	FALSE	FALSE	FALSE	TRUE	FALSE	FALSE
YLR343W	FALSE	0.432948	0.331996	0.310098	0.107937	0.0264234	0.185036	0.270007	0.390137	0.390615	0.230724	0.0966742	0.126798	0.0893552	0.00831105	0.0905873	0.1243	TRUE	TRUE	TRUE	FALSE	FALSE	FALSE	TRUE	TRUE	TRUE	FALSE	FALSE	FALSE	FALSE	FALSE	FALSE	FALSE
YEL054C	FALSE	0.0130729	0.0134108	0.0102148	0.0292842	0.00156494	0.0201891	0.0204066	0.0043926	0.0147508	0.0292127	0.0994409	0.0128163	0.0230244	0.0243359	0.0078741	0.0264254	FALSE	FALSE	FALSE	FALSE	FALSE	FALSE	FALSE	FALSE	FALSE	FALSE	FALSE	FALSE	FALSE	FALSE	FALSE	FALSE
YPL232W	FALSE	0.0328057	0.0114984	0.0662017	0.130936	0.134479	0.163934	0.184899	0.156908	0.0923753	0.0319649	0.152244	0.15601	0.157243	0.161629	0.136117	0.0610637	FALSE	FALSE	FALSE	FALSE	FALSE	FALSE	FALSE	FALSE	FALSE	FALSE	FALSE	FALSE	FALSE	FALSE	FALSE	FALSE
YOR005C	FALSE	0.0453201	0.0419122	0.061111	0.00147621	0.00680896	0.054247	0.00758796	0.0272715	0.049089	0.021081	0.0167096	0.034522	0.0315313	0.0190185	0.015095	0.00643966	FALSE	FALSE	FALSE	FALSE	FALSE	FALSE	FALSE	FALSE	FALSE	FALSE	FALSE	FALSE	FALSE	FALSE	FALSE	FALSE
YJR016C	FALSE	0.0868344	0.0487275	0.0130009	0.0121181	0.00824392	0.00424334	0.00876227	0.0728953	0.0893979	0.0640233	0.023165	0.00623418	0.00654104	0.0129085	0.0185071	0.00581056	FALSE	FALSE	FALSE	FALSE	FALSE	FALSE	FALSE	FALSE	FALSE	FALSE	FALSE	FALSE	FALSE	FALSE	FALSE	FALSE
YKL078W	FALSE	0.0437214	0.0691208	0.128442	0.155045	0.119288	0.0937759	0.0457314	0.0299808	0.0392122	0.0593416	0.037731	0.106296	0.114817	0.125688	0.0939086	0.0872202	FALSE	FALSE	FALSE	FALSE	FALSE	FALSE	FALSE	FALSE	FALSE	FALSE	FALSE	FALSE	FALSE	FALSE	FALSE	FALSE
YMR199W	TRUE	0.281998	0.210768	0.21304	0.186446	0.0986799	0.00298526	0.136214	0.389726	0.491854	0.544267	0.148921	0.0408089	0.0574176	0.108882	0.0812055	0.103222	TRUE	FALSE	FALSE	FALSE	FALSE	FALSE	FALSE	TRUE	TRUE	TRUE	FALSE	FALSE	FALSE	FALSE	FALSE	FALSE
YHR152W	TRUE	0.103092	0.153425	0.366503	0.426684	0.339476	0.178391	0.0105596	0.292622	0.3381	0.405843	0.223025	0.224683	0.158197	0.0819928	0.0293964	0.00673435	FALSE	FALSE	TRUE	TRUE	TRUE	FALSE	FALSE	TRUE	TRUE	TRUE	FALSE	FALSE	FALSE	FALSE	FALSE	FALSE
YGL092W	FALSE	0.00959577	0.0148867	0.021623	0.0287709	0.0261997	0.0684234	0.0305976	0.0143738	0.00622812	0.0290056	0.0235263	0.0410276	0.0424603	0.0201366	0.0262024	0.00759198	FALSE	FALSE	FALSE	FALSE	FALSE	FALSE	FALSE	FALSE	FALSE	FALSE	FALSE	FALSE	FALSE	FALSE	FALSE	FALSE
YNR028W	FALSE	0.11011	0.0836458	0.122203	0.0636072	0.0735977	0.0350476	0.00456776	0.0177452	0.0243195	0.058114	0.0258047	0.119009	0.127004	0.058701	0.0309117	0.0573179	FALSE	FALSE	FALSE	FALSE	FALSE	FALSE	FALSE	FALSE	FALSE	FALSE	FALSE	FALSE	FALSE	FALSE	FALSE	FALSE
YHR046C	FALSE	0.0736837	0.0262192	0.0390415	0.0155481	0.0746684	0.0385446	0.0114664	0.0510505	0.063133	0.0227362	0.0539466	0.0234675	0.0160442	0.00307708	0.0627807	0.0422447	FALSE	FALSE	FALSE	FALSE	FALSE	FALSE	FALSE	FALSE	FALSE	FALSE	FALSE	FALSE	FALSE	FALSE	FALSE	FALSE
YBR243C	FALSE	0.0580903	0.0364455	0.0998031	0.124615	0.103815	0.0657124	0.05271	0.032271	0.0333803	0.0504504	0.0949161	0.127398	0.0945652	0.0449812	0.00614061	0.00678581	FALSE	FALSE	FALSE	FALSE	FALSE	FALSE	FALSE	FALSE	FALSE	FALSE	FALSE	FALSE	FALSE	FALSE	FALSE	FALSE
YDL224C	FALSE	0.0428961	0.00581355	0.022843	0.0186585	0.0663676	0.0468484	0.0555947	0.0577183	0.0462039	0.00251628	0.0328889	0.0397696	0.0582984	0.0206726	0.0140421	0.0127418	FALSE	FALSE	FALSE	FALSE	FALSE	FALSE	FALSE	FALSE	FALSE	FALSE	FALSE	FALSE	FALSE	FALSE	FALSE	FALSE
YDL089W	FALSE	0.0253225	0.0115711	0.0924325	0.0975107	0.130837	0.116811	0.0631014	0.0172066	0.0885271	0.0413837	0.112308	0.0659879	0.0921299	0.0346248	0.0240553	0.0299106	FALSE	FALSE	FALSE	FALSE	FALSE	FALSE	FALSE	FALSE	FALSE	FALSE	FALSE	FALSE	FALSE	FALSE	FALSE	FALSE
YCR011C	FALSE	0.0158277	0.0155947	0.0465558	0.0127553	0.0307565	0.0307784	0.0114331	0.0417643	0.0341061	0.0488802	0.0268017	0.00494889	0.00683104	0.0260301	0.0338452	0.0040025	FALSE	FALSE	FALSE	FALSE	FALSE	FALSE	FALSE	FALSE	FALSE	FALSE	FALSE	FALSE	FALSE	FALSE	FALSE	FALSE
YIR022W	FALSE	0.0419766	0.0230119	0.0234301	0.0172319	0.00640365	0.0376586	0.00966078	0.0209648	0.0185803	0.0113126	0.067953	0.0132106	0.00751564	0.0259112	0.023638	0.0212348	FALSE	FALSE	FALSE	FALSE	FALSE	FALSE	FALSE	FALSE	FALSE	FALSE	FALSE	FALSE	FALSE	FALSE	FALSE	FALSE
YKR089C	FALSE	0.093076	0.119673	0.158407	0.0857968	0.0244754	0.0129269	0.00355825	0.0690597	0.0671143	0.102013	0.0289707	0.0850153	0.0681635	0.0576477	0.0395928	0.0503134	FALSE	FALSE	FALSE	FALSE	FALSE	FALSE	FALSE	FALSE	FALSE	FALSE	FALSE	FALSE	FALSE	FALSE	FALSE	FALSE
YPL100W	FALSE	0.0180008	0.0175866	0.0521719	0.0791768	0.0538886	0.056249	0.00907269	0.0217401	0.0162482	0.012612	0.0253674	0.0194518	0.0487923	0.0379116	0.0363556	0.0544735	FALSE	FALSE	FALSE	FALSE	FALSE	FALSE	FALSE	FALSE	FALSE	FALSE	FALSE	FALSE	FALSE	FALSE	FALSE	FALSE
YLR255C	FALSE	0.0797118	0.213842	0.0808784	0.067292	0.0660497	0.0289723	0.0546307	0.229833	0.0194739	0.263205	0.101271	0.0185439	0.0485649	0.155149	0.0310255	0.133485	FALSE	FALSE	FALSE	FALSE	FALSE	FALSE	FALSE	FALSE	FALSE	TRUE	FALSE	FALSE	FALSE	FALSE	FALSE	FALSE
YGL144C	FALSE	0.0556521	0.0577519	0.0825012	0.0209052	0.0501809	0.00697224	0.00719201	0.0235214	0.110226	0.0825094	0.00920346	0.00320454	0.00803284	0.0297298	0.00463645	0.00425834	FALSE	FALSE	FALSE	FALSE	FALSE	FALSE	FALSE	FALSE	FALSE	FALSE	FALSE	FALSE	FALSE	FALSE	FALSE	FALSE
YOL063C	FALSE	0.00161104	0.00346006	0.00550436	0.0231106	0.0454776	0.0483897	0.0212771	0.00292391	0.00369705	0.0312323	0.036506	0.0361895	0.0222223	0.023742	0.0296288	0.0404189	FALSE	FALSE	FALSE	FALSE	FALSE	FALSE	FALSE	FALSE	FALSE	FALSE	FALSE	FALSE	FALSE	FALSE	FALSE	FALSE
YOR099W	FALSE	0.0575113	0.0716359	0.0791377	0.0613875	0.0189715	0.0489234	0.0726858	0.0758025	0.0825274	0.0973671	0.0861169	0.0298308	0.0136622	0.0093666	0.0490422	0.0447456	FALSE	FALSE	FALSE	FALSE	FALSE	FALSE	FALSE	FALSE	FALSE	FALSE	FALSE	FALSE	FALSE	FALSE	FALSE	FALSE
YGR235C	FALSE	0.0312631	0.021012	0.0173938	0.0678331	0.0643542	0.0657635	0.0213388	0.0493297	0.00847795	0.0312506	0.099628	0.0349976	0.0197274	0.0949235	0.051787	0.0237266	FALSE	FALSE	FALSE	FALSE	FALSE	FALSE	FALSE	FALSE	FALSE	FALSE	FALSE	FALSE	FALSE	FALSE	FALSE	FALSE
YMR128W	FALSE	0.0571371	0.0275326	0.0160311	0.0234007	0.0415263	0.024251	0.00955345	0.0169598	0.023547	0.0215346	0.0295557	0.0163748	0.0108309	0.0240106	0.0422435	0.054169	FALSE	FALSE	FALSE	FALSE	FALSE	FALSE	FALSE	FALSE	FALSE	FALSE	FALSE	FALSE	FALSE	FALSE	FALSE	FALSE
YOL028C	FALSE	0.0218043	0.0129666	0.0374651	0.0195283	0.0184899	0.00146636	0.0538291	0.0128243	0.0690053	0.00660601	0.0100433	0.0207206	0.00387841	0.00290743	0.0406184	0.0233475	FALSE	FALSE	FALSE	FALSE	FALSE	FALSE	FALSE	FALSE	FALSE	FALSE	FALSE	FALSE	FALSE	FALSE	FALSE	FALSE
YPR067W	FALSE	0.0765217	0.0866911	0.107752	0.0308916	0.0110608	0.0145684	0.0228862	0.0372613	0.0518583	0.0292766	0.0556817	0.0502038	0.0404461	0.0213086	0.0228939	0.0437077	FALSE	FALSE	FALSE	FALSE	FALSE	FALSE	FALSE	FALSE	FALSE	FALSE	FALSE	FALSE	FALSE	FALSE	FALSE	FALSE
YKL186C	FALSE	0.0222072	0.0429515	0.0509129	0.0626804	0.0687519	0.0626031	0.0875228	0.0266231	0.0141576	0.113931	0.147644	0.0588504	0.032327	0.0515471	0.0345241	0.0382227	FALSE	FALSE	FALSE	FALSE	FALSE	FALSE	FALSE	FALSE	FALSE	FALSE	FALSE	FALSE	FALSE	FALSE	FALSE	FALSE
YAR008W	FALSE	0.31369	0.230957	0.278344	0.0500411	0.0665045	0.24141	0.35159	0.439416	0.387228	0.244729	0.0346412	0.0853911	0.135662	0.116169	0.0801758	0.0846945	TRUE	FALSE	TRUE	FALSE	FALSE	FALSE	TRUE	TRUE	TRUE	FALSE	FALSE	FALSE	FALSE	FALSE	FALSE	FALSE
YDR264C	FALSE	0.079617	0.0511399	0.0463728	0.00197579	0.0266806	0.0192537	0.0306881	0.0356143	0.0446216	0.0421439	0.0335278	0.00922501	0.00108479	0.0068028	0.0299046	0.019694	FALSE	FALSE	FALSE	FALSE	FALSE	FALSE	FALSE	FALSE	FALSE	FALSE	FALSE	FALSE	FALSE	FALSE	FALSE	FALSE
YDR390C	FALSE	0.054753	0.0200875	0.0785359	0.0795286	0.119214	0.121868	0.124872	0.0800634	0.040359	0.0033027	0.0745189	0.102291	0.0887637	0.0784478	0.117455	0.0637577	FALSE	FALSE	FALSE	FALSE	FALSE	FALSE	FALSE	FALSE	FALSE	FALSE	FALSE	FALSE	FALSE	FALSE	FALSE	FALSE
YNL286W	FALSE	0.0170227	0.0390809	0.0027952	0.0569201	0.0227678	0.0188343	0.0181157	0.0188119	0.0624914	0.0370427	0.0862184	0.00401755	0.0175727	0.0245606	0.01889	0.0177645	FALSE	FALSE	FALSE	FALSE	FALSE	FALSE	FALSE	FALSE	FALSE	FALSE	FALSE	FALSE	FALSE	FALSE	FALSE	FALSE
YDR216W	FALSE	0.221886	0.197608	0.206625	0.0392272	0.0414257	0.113563	0.146419	0.180966	0.197428	0.159848	0.0505443	0.0239135	0.01907	0.0203562	0.018405	0.0532874	FALSE	FALSE	FALSE	FALSE	FALSE	FALSE	FALSE	FALSE	FALSE	FALSE	FALSE	FALSE	FALSE	FALSE	FALSE	FALSE
YNL032W	FALSE	0.0965182	0.142413	0.192857	0.135278	0.0449842	0.0191637	0.00738282	0.0672892	0.0877012	0.125332	0.161309	0.0948236	0.103343	0.0693578	0.0347903	0.0255248	FALSE	FALSE	FALSE	FALSE	FALSE	FALSE	FALSE	FALSE	FALSE	FALSE	FALSE	FALSE	FALSE	FALSE	FALSE	FALSE
YDR377W	FALSE	0.0117889	0.0282478	0.117049	0.0534405	0.0828355	0.0615722	0.00894674	0.0313491	0.0322519	0.0992187	0.00378483	0.0445403	0.0629296	0.00932307	0.0448349	0.0353725	FALSE	FALSE	FALSE	FALSE	FALSE	FALSE	FALSE	FALSE	FALSE	FALSE	FALSE	FALSE	FALSE	FALSE	FALSE	FALSE
YDR095C	FALSE	0.115223	0.145621	0.153881	0.0670244	0.129438	0.208847	0.229118	0.00646219	0.0609998	0.0526978	0.0398482	0.0625141	0.0786457	0.0610814	0.0611284	0.0329901	FALSE	FALSE	FALSE	FALSE	FALSE	FALSE	FALSE	FALSE	FALSE	FALSE	FALSE	FALSE	FALSE	FALSE	FALSE	FALSE
YAR023C	FALSE	0.00558905	0.015301	0.048112	0.013676	0.0127297	0.0158548	0.0656082	0.0480646	0.0183376	0.078244	0.0630786	0.0156665	0.0562572	0.0799527	0.0401048	0.0392142	FALSE	FALSE	FALSE	FALSE	FALSE	FALSE	FALSE	FALSE	FALSE	FALSE	FALSE	FALSE	FALSE	FALSE	FALSE	FALSE
YPL051W	FALSE	0.0273757	0.0308949	0.0454688	0.0700889	0.0671077	0.0485236	0.00316878	0.0896035	0.0752058	0.0337509	0.133736	0.0374466	0.00191194	0.0188896	0.00205568	0.0170288	FALSE	FALSE	FALSE	FALSE	FALSE	FALSE	FALSE	FALSE	FALSE	FALSE	FALSE	FALSE	FALSE	FALSE	FALSE	FALSE
YBR065C	FALSE	0.0501917	0.050416	0.0355269	0.00569516	0.0504761	0.060607	0.0487592	0.0417924	0.0412083	0.066928	0.0351713	0.0135231	0.0148602	0.0108961	0.0341398	0.0578034	FALSE	FALSE	FALSE	FALSE	FALSE	FALSE	FALSE	FALSE	FALSE	FALSE	FALSE	FALSE	FALSE	FALSE	FALSE	FALSE
YDR222W	FALSE	0.239604	0.286004	0.414795	0.401038	0.297132	0.184995	0.0612654	0.135812	0.247417	0.446117	0.357485	0.343545	0.260012	0.154568	0.085587	0.0389868	FALSE	TRUE	TRUE	TRUE	TRUE	FALSE	FALSE	FALSE	FALSE	TRUE	TRUE	TRUE	TRUE	FALSE	FALSE	FALSE
YML087C	FALSE	0.0537116	0.0183379	0.0744812	0.138108	0.140522	0.10978	0.0763135	0.0521521	0.0313687	0.0629918	0.0168218	0.124036	0.176693	0.0788647	0.0143401	0.00300301	FALSE	FALSE	FALSE	FALSE	FALSE	FALSE	FALSE	FALSE	FALSE	FALSE	FALSE	FALSE	FALSE	FALSE	FALSE	FALSE
YDR344C	FALSE	0.0650234	0.0301531	0.0174913	0.0688194	0.053494	0.074662	0.00380904	0.0162212	0.115104	0.0447371	0.0931925	0.0144923	0.0726197	0.0264614	0.00586861	0.0109989	FALSE	FALSE	FALSE	FALSE	FALSE	FALSE	FALSE	FALSE	FALSE	FALSE	FALSE	FALSE	FALSE	FALSE	FALSE	FALSE
YPR112C	FALSE	0.0205806	0.00187483	0.013594	0.0229968	0.0248179	0.0603626	0.00655741	0.0673132	0.0556304	0.00747075	0.0267949	0.0259451	0.00549786	0.0848771	0.0640999	0.0568403	FALSE	FALSE	FALSE	FALSE	FALSE	FALSE	FALSE	FALSE	FALSE	FALSE	FALSE	FALSE	FALSE	FALSE	FALSE	FALSE
YBR202W	TRUE	0.0402555	0.135057	0.371974	0.499186	0.398574	0.184418	0.0367468	0.198943	0.284636	0.320532	0.261841	0.233288	0.179058	0.106048	0.040601	0.00904249	FALSE	FALSE	TRUE	TRUE	TRUE	FALSE	FALSE	FALSE	TRUE	TRUE	TRUE	FALSE	FALSE	FALSE	FALSE	FALSE
YER123W	FALSE	0.0394549	0.0429372	0.00317889	0.00504552	0.00879548	0.0669044	0.0438004	0.00405227	0.0499819	0.0405847	0.00555628	0.004613	0.0103462	0.00281437	0.019483	0.017795	FALSE	FALSE	FALSE	FALSE	FALSE	FALSE	FALSE	FALSE	FALSE	FALSE	FALSE	FALSE	FALSE	FALSE	FALSE	FALSE
YOR256C	FALSE	0.0513034	0.0235344	0.0229842	0.0163315	0.0650556	0.0696589	0.0498	0.00906119	0.00584551	0.0230166	0.0608681	0.00731175	0.00849405	0.0203982	0.00423142	0.0386455	FALSE	FALSE	FALSE	FALSE	FALSE	FALSE	FALSE	FALSE	FALSE	FALSE	FALSE	FALSE	FALSE	FALSE	FALSE	FALSE
YOR368W	TRUE	0.0989086	0.0711148	0.0981378	0.0139467	0.00237188	0.0445115	0.0325917	0.0560858	0.00988179	0.0945314	0.0356403	0.0485529	0.00986708	0.00100048	0.0152169	0.00445795	FALSE	FALSE	FALSE	FALSE	FALSE	FALSE	FALSE	FALSE	FALSE	FALSE	FALSE	FALSE	FALSE	FALSE	FALSE	FALSE
YPR139C	FALSE	0.0776481	0.0774781	0.0355785	0.0057485	0.0439755	0.0962603	0.076178	0.0656167	0.0462569	0.0199303	0.00513719	0.0234507	0.0144141	0.0221328	0.0326123	0.0136896	FALSE	FALSE	FALSE	FALSE	FALSE	FALSE	FALSE	FALSE	FALSE	FALSE	FALSE	FALSE	FALSE	FALSE	FALSE	FALSE
YGR246C	FALSE	0.0586137	0.0570452	0.034649	0.0461875	0.00729332	0.0347852	0.00972233	0.0105427	0.0409681	0.0275092	0.0113762	0.0212643	0.0237516	0.0201797	0.041996	0.0497839	FALSE	FALSE	FALSE	FALSE	FALSE	FALSE	FALSE	FALSE	FALSE	FALSE	FALSE	FALSE	FALSE	FALSE	FALSE	FALSE
YFR009W	FALSE	0.0198267	0.00978266	0.0259787	0.0228824	0.0346303	0.0407698	0.0250849	0.00308078	0.0107205	0.0289424	0.0149944	0.00270241	0.021301	0.0139057	0.0155858	0.0016008	FALSE	FALSE	FALSE	FALSE	FALSE	FALSE	FALSE	FALSE	FALSE	FALSE	FALSE	FALSE	FALSE	FALSE	FALSE	FALSE
YOR165W	FALSE	0.0353676	0.0144978	0.0639691	0.053586	0.0735575	0.090652	0.0849906	0.0559149	0.0395418	0.0351552	0.0493915	0.0690203	0.0582716	0.0736652	0.0758901	0.0266603	FALSE	FALSE	FALSE	FALSE	FALSE	FALSE	FALSE	FALSE	FALSE	FALSE	FALSE	FALSE	FALSE	FALSE	FALSE	FALSE
YPL259C	FALSE	0.0553582	0.0537167	0.0297823	0.0188488	0.0256282	0.062103	0.0223337	0.00727698	0.0413457	0.0282792	0.0694254	0.00388279	0.0174314	0.0186409	0.00664912	0.0311618	FALSE	FALSE	FALSE	FALSE	FALSE	FALSE	FALSE	FALSE	FALSE	FALSE	FALSE	FALSE	FALSE	FALSE	FALSE	FALSE
YMR046C	FALSE	0.0465768	0.0488577	0.151244	0.0383705	0.0685641	0.0603389	0.0351487	0.007948	0.0781086	0.0418469	0.0376874	0.0291698	0.0134025	0.00685382	0.0227128	0.0191268	FALSE	FALSE	FALSE	FALSE	FALSE	FALSE	FALSE	FALSE	FALSE	FALSE	FALSE	FALSE	FALSE	FALSE	FALSE	FALSE
YOR362C	FALSE	0.0300666	0.0346947	0.0802723	0.134494	0.0749831	0.0474486	0.00277153	0.0186875	0.0239295	0.00827286	0.0673964	0.0668961	0.0410715	0.0812878	0.060338	0.0235659	FALSE	FALSE	FALSE	FALSE	FALSE	FALSE	FALSE	FALSE	FALSE	FALSE	FALSE	FALSE	FALSE	FALSE	FALSE	FALSE
YOL146W	FALSE	0.115698	0.119803	0.125403	0.0441626	0.0440164	0.0824406	0.0958792	0.131106	0.194246	0.0893922	0.0110833	0.0151836	0.00708601	0.0431525	0.0731696	0.0183237	FALSE	FALSE	FALSE	FALSE	FALSE	FALSE	FALSE	FALSE	FALSE	FALSE	FALSE	FALSE	FALSE	FALSE	FALSE	FALSE
YMR301C	FALSE	0.00968226	0.0406158	0.12284	0.0445921	0.0952396	0.061493	0.0425656	0.0066855	0.0348477	0.0588679	0.0581557	0.0424909	0.0862168	0.0273147	0.030246	0.0571047	FALSE	FALSE	FALSE	FALSE	FALSE	FALSE	FALSE	FALSE	FALSE	FALSE	FALSE	FALSE	FALSE	FALSE	FALSE	FALSE
YBR233W	FALSE	0.171318	0.130612	0.160295	0.0137937	0.0183158	0.055998	0.106039	0.173524	0.111801	0.104643	0.0249771	0.0427603	0.0230132	0.0167993	0.0137473	0.0461994	FALSE	FALSE	FALSE	FALSE	FALSE	FALSE	FALSE	FALSE	FALSE	FALSE	FALSE	FALSE	FALSE	FALSE	FALSE	FALSE
YMR314W	FALSE	0.0188067	0.0193506	0.0613759	0.0581881	0.0405226	0.010274	0.0139706	0.0207844	0.0553909	0.00791801	0.0427962	0.0214978	0.0160743	0.0516903	0.0588033	0.0282194	FALSE	FALSE	FALSE	FALSE	FALSE	FALSE	FALSE	FALSE	FALSE	FALSE	FALSE	FALSE	FALSE	FALSE	FALSE	FALSE
YNR059W	FALSE	0.00667761	0.00277587	0.0099518	0.00884077	0.0538268	0.0873866	0.0279603	0.0173654	0.0191534	0.00513495	0.00466439	0.0360629	0.0574188	0.026948	0.0370992	0.0203771	FALSE	FALSE	FALSE	FALSE	FALSE	FALSE	FALSE	FALSE	FALSE	FALSE	FALSE	FALSE	FALSE	FALSE	FALSE	FALSE
YGR147C	FALSE	0.0662241	0.0648598	0.023518	0.0377934	0.0092096	0.0262737	0.0376563	0.0187275	0.00954551	0.0351606	0.0539609	0.0509945	0.0264636	0.00526646	0.0237068	0.00548295	FALSE	FALSE	FALSE	FALSE	FALSE	FALSE	FALSE	FALSE	FALSE	FALSE	FALSE	FALSE	FALSE	FALSE	FALSE	FALSE
YOL065C	FALSE	0.0983434	0.0398407	0.0304862	0.0447553	0.0220049	0.0196882	0.0565598	0.0472112	0.0363697	0.0417549	0.0318161	0.0593819	0.0145326	0.0182327	0.0207968	0.00682033	FALSE	FALSE	FALSE	FALSE	FALSE	FALSE	FALSE	FALSE	FALSE	FALSE	FALSE	FALSE	FALSE	FALSE	FALSE	FALSE
YDR237W	FALSE	0.0447218	0.0148515	0.0319849	0.00322783	0.0454776	0.0389409	0.0209241	0.0625718	0.0404285	0.00611846	0.0667704	0.0468601	0.0462489	0.00910483	0.00453195	0.0389604	FALSE	FALSE	FALSE	FALSE	FALSE	FALSE	FALSE	FALSE	FALSE	FALSE	FALSE	FALSE	FALSE	FALSE	FALSE	FALSE
YJL019W	FALSE	0.143583	0.113287	0.153969	0.158107	0.0963869	0.0159724	0.0500512	0.179104	0.14607	0.193126	0.146547	0.0463709	0.0328334	0.0117796	0.0259131	0.0468017	FALSE	FALSE	FALSE	FALSE	FALSE	FALSE	FALSE	FALSE	FALSE	FALSE	FALSE	FALSE	FALSE	FALSE	FALSE	FALSE
YMR070W	FALSE	0.0452776	0.0475028	0.051596	0.00137785	0.0589742	0.0899976	0.075927	0.0593321	0.0131248	0.0032374	0.0241197	0.0511172	0.0540396	0.0894559	0.0999786	0.0851403	FALSE	FALSE	FALSE	FALSE	FALSE	FALSE	FALSE	FALSE	FALSE	FALSE	FALSE	FALSE	FALSE	FALSE	FALSE	FALSE
YDL208W	FALSE	0.00242105	0.00569673	0.00765054	0.0280024	0.0378337	0.0350917	0.0227253	0.029291	0.00967253	0.0146805	0.0248873	0.0605031	0.0450791	0.00715096	0.00269105	0.00240734	FALSE	FALSE	FALSE	FALSE	FALSE	FALSE	FALSE	FALSE	FALSE	FALSE	FALSE	FALSE	FALSE	FALSE	FALSE	FALSE
YLR182W	TRUE	0.0175291	0.0138976	0.0844769	0.0803163	0.0951617	0.0893863	0.0311932	0.047179	0.0171357	0.0906029	0.052777	0.0892462	0.0836332	0.0125199	0.04124	0.0209707	FALSE	FALSE	FALSE	FALSE	FALSE	FALSE	FALSE	FALSE	FALSE	FALSE	FALSE	FALSE	FALSE	FALSE	FALSE	FALSE
YGR218W	FALSE	0.0169706	0.0251289	0.0278693	0.0282479	0.0224691	0.0592535	0.0489018	0.0031796	0.00409737	0.0213279	0.0386835	0.0142435	0.0139234	0.0242627	0.028521	0.00872689	FALSE	FALSE	FALSE	FALSE	FALSE	FALSE	FALSE	FALSE	FALSE	FALSE	FALSE	FALSE	FALSE	FALSE	FALSE	FALSE
YJL103C	FALSE	0.276067	0.144428	0.148656	0.101394	0.0100138	0.0270837	0.0824927	0.220769	0.172398	0.175165	0.0732544	0.0155825	0.0069623	0.0126887	0.0493876	0.0236682	TRUE	FALSE	FALSE	FALSE	FALSE	FALSE	FALSE	FALSE	FALSE	FALSE	FALSE	FALSE	FALSE	FALSE	FALSE	FALSE
YJL111W	FALSE	0.0149212	0.00750054	0.0438982	0.05092	0.0388939	0.0437057	0.0225715	0.0334833	0.0318208	0.0150434	0.0497868	0.00515504	0.00983096	0.0472686	0.0358982	0.00530573	FALSE	FALSE	FALSE	FALSE	FALSE	FALSE	FALSE	FALSE	FALSE	FALSE	FALSE	FALSE	FALSE	FALSE	FALSE	FALSE
YDR304C	FALSE	0.0759484	0.0455396	0.0263786	0.0014803	0.0383671	0.0603872	0.0693094	0.0378212	0.00805809	0.0306896	0.0660276	0.0164314	0.026571	0.00679769	0.0185871	0.052434	FALSE	FALSE	FALSE	FALSE	FALSE	FALSE	FALSE	FALSE	FALSE	FALSE	FALSE	FALSE	FALSE	FALSE	FALSE	FALSE
YDR174W	FALSE	0.0389258	0.0217831	0.0578163	0.1525	0.15925	0.100154	0.0508051	0.0616531	0.0137579	0.0351325	0.0235121	0.046102	0.0839482	0.0981502	0.101489	0.124658	FALSE	FALSE	FALSE	FALSE	FALSE	FALSE	FALSE	FALSE	FALSE	FALSE	FALSE	FALSE	FALSE	FALSE	FALSE	FALSE
YBR099C	FALSE	0.11576	0.0932072	0.0672806	0.0616831	0.0720505	0.114387	0.133778	0.0024806	0.0370086	0.0409639	0.011441	0.00250853	0.0429696	0.135328	0.023063	0.0222312	FALSE	FALSE	FALSE	FALSE	FALSE	FALSE	FALSE	FALSE	FALSE	FALSE	FALSE	FALSE	FALSE	FALSE	FALSE	FALSE
YHR202W	FALSE	0.0176763	0.0249899	0.0250659	0.059312	0.0991773	0.136481	0.0964907	0.137858	0.0488075	0.0127382	0.0378208	0.036668	0.0741364	0.096852	0.112977	0.0676907	FALSE	FALSE	FALSE	FALSE	FALSE	FALSE	FALSE	FALSE	FALSE	FALSE	FALSE	FALSE	FALSE	FALSE	FALSE	FALSE
YDR412W	FALSE	0.0171657	0.0195031	0.00606045	0.0375036	0.0272508	0.04685	0.00280036	0.0190637	0.0312718	0.0111584	0.0904162	0.0547385	0.0195678	0.0185283	0.0280596	0.0405226	FALSE	FALSE	FALSE	FALSE	FALSE	FALSE	FALSE	FALSE	FALSE	FALSE	FALSE	FALSE	FALSE	FALSE	FALSE	FALSE
YPL148C	FALSE	0.0220184	0.117429	0.144495	0.0598912	0.0653919	0.0707307	0.0727799	0.112122	0.0786939	0.149612	0.109987	0.0189424	0.0360693	0.0149589	0.0277715	0.0154532	FALSE	FALSE	FALSE	FALSE	FALSE	FALSE	FALSE	FALSE	FALSE	FALSE	FALSE	FALSE	FALSE	FALSE	FALSE	FALSE
YIR029W	FALSE	0.037605	0.0311465	0.0282033	0.058919	0.028867	0.0409614	0.0576821	0.0463276	0.0839242	0.0251996	0.0150933	0.00945108	0.0263776	0.00120272	0.030528	0.0149261	FALSE	FALSE	FALSE	FALSE	FALSE	FALSE	FALSE	FALSE	FALSE	FALSE	FALSE	FALSE	FALSE	FALSE	FALSE	FALSE
YDR397C	FALSE	0.0634244	0.016324	0.00133446	0.0724183	0.0984014	0.100372	0.0862723	0.0945016	0.05176	0.0172717	0.0340745	0.0964093	0.0974448	0.0337699	0.0512749	0.0210006	FALSE	FALSE	FALSE	FALSE	FALSE	FALSE	FALSE	FALSE	FALSE	FALSE	FALSE	FALSE	FALSE	FALSE	FALSE	FALSE
YJL002C	FALSE	0.0455148	0.0462347	0.0606059	0.0565699	0.0609724	0.00301258	0.00649885	0.0172943	0.0420662	0.0763449	0.0822553	0.0589938	0.0506789	0.00706938	0.0262686	0.00582493	FALSE	FALSE	FALSE	FALSE	FALSE	FALSE	FALSE	FALSE	FALSE	FALSE	FALSE	FALSE	FALSE	FALSE	FALSE	FALSE
YOL061W	FALSE	0.0105639	0.00229007	0.00609535	0.0134437	0.0288799	0.0212628	0.0267561	0.00110553	0.0235848	0.021594	0.0101709	0.00520079	0.0223642	0.00359656	0.0044411	0.0141803	FALSE	FALSE	FALSE	FALSE	FALSE	FALSE	FALSE	FALSE	FALSE	FALSE	FALSE	FALSE	FALSE	FALSE	FALSE	FALSE
YAL023C	FALSE	0.0609113	0.105004	0.132892	0.11518	0.0717332	0.00719754	0.0199552	0.0658409	0.0847429	0.109369	0.135091	0.075075	0.0472788	0.0345955	0.00521759	0.00122115	FALSE	FALSE	FALSE	FALSE	FALSE	FALSE	FALSE	FALSE	FALSE	FALSE	FALSE	FALSE	FALSE	FALSE	FALSE	FALSE
YER082C	FALSE	0.0109943	0.00997108	0.00575585	0.0102497	0.0235219	0.0319281	0.0128423	0.00980923	0.0232662	0.0248542	0.0207267	0.0283433	0.0102231	0.0723277	0.0149688	0.0416345	FALSE	FALSE	FALSE	FALSE	FALSE	FALSE	FALSE	FALSE	FALSE	FALSE	FALSE	FALSE	FALSE	FALSE	FALSE	FALSE
YOL034W	FALSE	0.138043	0.0943403	0.0451878	0.00649773	0.0175601	0.00271281	0.0784349	0.125433	0.0558859	0.0513293	0.00101574	0.0266894	0.02792	0.0131846	0.0391981	0.0477433	FALSE	FALSE	FALSE	FALSE	FALSE	FALSE	FALSE	FALSE	FALSE	FALSE	FALSE	FALSE	FALSE	FALSE	FALSE	FALSE
YDR103W	FALSE	0.010635	0.00762842	0.0429954	0.0224535	0.0344585	0.0149837	0.0186671	0.00252893	0.00505049	0.00311989	0.0275361	0.00472523	0.00818473	0.0259034	0.0195015	0.00220566	FALSE	FALSE	FALSE	FALSE	FALSE	FALSE	FALSE	FALSE	FALSE	FALSE	FALSE	FALSE	FALSE	FALSE	FALSE	FALSE
YHR203C	FALSE	0.0248489	0.018958	0.00388483	0.00835223	0.081331	0.0516151	0.0327223	0.0714242	0.0383951	0.0420438	0.0099572	0.0324031	0.0584412	0.0401611	0.0462228	0.0721175	FALSE	FALSE	FALSE	FALSE	FALSE	FALSE	FALSE	FALSE	FALSE	FALSE	FALSE	FALSE	FALSE	FALSE	FALSE	FALSE
YKL142W	FALSE	0.0695805	0.0122554	0.111288	0.161444	0.14027	0.110098	0.0778914	0.0283662	0.0765847	0.0515118	0.0653073	0.0700241	0.0933033	0.0868033	0.0260292	0.0639413	FALSE	FALSE	FALSE	FALSE	FALSE	FALSE	FALSE	FALSE	FALSE	FALSE	FALSE	FALSE	FALSE	FALSE	FALSE	FALSE
YKL217W	FALSE	0.123217	0.0431246	0.0661049	0.115751	0.0740102	0.11851	0.119442	0.0226032	0.00701205	0.0443651	0.106949	0.0303554	0.0331118	0.0786854	0.0588098	0.0172701	FALSE	FALSE	FALSE	FALSE	FALSE	FALSE	FALSE	FALSE	FALSE	FALSE	FALSE	FALSE	FALSE	FALSE	FALSE	FALSE
YOR025W	FALSE	0.592922	0.412183	0.389291	0.102125	0.198711	0.383552	0.476421	0.535361	0.464595	0.384056	0.148647	0.0902472	0.036476	0.127598	0.197075	0.238295	TRUE	TRUE	TRUE	FALSE	FALSE	TRUE	TRUE	TRUE	TRUE	TRUE	FALSE	FALSE	FALSE	FALSE	FALSE	FALSE
YML014W	FALSE	0.0112238	0.030681	0.0263107	0.0643817	0.00964093	0.0347074	0.0124287	0.00461259	0.0112419	0.0329167	0.00268492	0.0471048	0.00318893	0.00894957	0.0298818	0.0327894	FALSE	FALSE	FALSE	FALSE	FALSE	FALSE	FALSE	FALSE	FALSE	FALSE	FALSE	FALSE	FALSE	FALSE	FALSE	FALSE
YHR199C-A	FALSE	0.0741035	0.0107613	0.0654015	0.149413	0.0731667	0.0870154	0.0181585	0.050173	0.213315	0.0526812	0.14328	0.102998	0.00168263	0.0564803	0.0097057	0.0428187	FALSE	FALSE	FALSE	FALSE	FALSE	FALSE	FALSE	FALSE	FALSE	FALSE	FALSE	FALSE	FALSE	FALSE	FALSE	FALSE
YGL011C	FALSE	0.0266995	0.0346988	0.06743	0.0854712	0.066651	0.0425659	0.0206173	0.0373788	0.0345313	0.0382068	0.0320717	0.0575126	0.0588633	0.0490961	0.0701869	0.0247114	FALSE	FALSE	FALSE	FALSE	FALSE	FALSE	FALSE	FALSE	FALSE	FALSE	FALSE	FALSE	FALSE	FALSE	FALSE	FALSE
YNL179C	FALSE	0.0672619	0.0429773	0.042662	0.0275533	0.0914573	0.103085	0.0847208	0.0572678	0.209159	0.148642	0.191893	0.0019193	0.0695212	0.0407738	0.0858292	0.180028	FALSE	FALSE	FALSE	FALSE	FALSE	FALSE	FALSE	FALSE	FALSE	FALSE	FALSE	FALSE	FALSE	FALSE	FALSE	FALSE
YIL101C	FALSE	0.0863595	0.105071	0.0592456	0.0472194	0.0539451	0.0481435	0.11499	0.108197	0.0266049	0.00486466	0.0120511	0.0346485	0.0636951	0.0730855	0.0356129	0.070317	FALSE	FALSE	FALSE	FALSE	FALSE	FALSE	FALSE	FALSE	FALSE	FALSE	FALSE	FALSE	FALSE	FALSE	FALSE	FALSE
YGL018C	FALSE	0.0829182	0.0365224	0.0763231	0.106357	0.0885847	0.0231319	0.0313949	0.0346163	0.0229541	0.0557747	0.0791834	0.0169496	0.0733537	0.101015	0.0439926	0.0325844	FALSE	FALSE	FALSE	FALSE	FALSE	FALSE	FALSE	FALSE	FALSE	FALSE	FALSE	FALSE	FALSE	FALSE	FALSE	FALSE
YEL006W	FALSE	0.0751851	0.00502495	0.00650032	0.0525474	0.0806547	0.0839415	0.0648836	0.0299306	0.00797918	0.0184157	0.0265255	0.0478808	0.0667628	0.0238655	0.0145199	0.0367042	FALSE	FALSE	FALSE	FALSE	FALSE	FALSE	FALSE	FALSE	FALSE	FALSE	FALSE	FALSE	FALSE	FALSE	FALSE	FALSE
YLR447C	FALSE	0.0542335	0.0505837	0.0332466	0.0365051	0.0423615	0.0567408	0.0620111	0.0325162	0.0274386	0.0471908	0.00552848	0.0246583	0.0069983	0.0167271	0.0150107	0.0230752	FALSE	FALSE	FALSE	FALSE	FALSE	FALSE	FALSE	FALSE	FALSE	FALSE	FALSE	FALSE	FALSE	FALSE	FALSE	FALSE
YBR176W	FALSE	0.0330672	0.00403295	0.0261122	0.00959474	0.0139051	0.0202103	0.0228064	0.00547905	0.0458341	0.0179582	0.0141139	0.0261971	0.0218782	0.0447833	0.00494495	0.0781201	FALSE	FALSE	FALSE	FALSE	FALSE	FALSE	FALSE	FALSE	FALSE	FALSE	FALSE	FALSE	FALSE	FALSE	FALSE	FALSE
YPR116W	FALSE	0.079126	0.0260179	0.0733734	0.0288506	0.0662382	0.121664	0.0899488	0.0798099	0.153351	0.0511579	0.0691133	0.0954217	0.00977676	0.0317595	0.0261996	0.0450813	FALSE	FALSE	FALSE	FALSE	FALSE	FALSE	FALSE	FALSE	FALSE	FALSE	FALSE	FALSE	FALSE	FALSE	FALSE	FALSE
YDR293C	FALSE	0.0940448	0.0825233	0.0662217	0.0248124	0.0617309	0.090747	0.0508625	0.0301875	0.0259	0.0181597	0.00431208	0.00989269	0.00845502	0.0125103	0.0138812	0.00161698	FALSE	FALSE	FALSE	FALSE	FALSE	FALSE	FALSE	FALSE	FALSE	FALSE	FALSE	FALSE	FALSE	FALSE	FALSE	FALSE
YOR261C	FALSE	0.0476722	0.00578651	0.061163	0.120164	0.121351	0.0904809	0.0478905	0.0409347	0.0174461	0.0487211	0.101225	0.0759871	0.0767023	0.0593955	0.0147133	0.00242937	FALSE	FALSE	FALSE	FALSE	FALSE	FALSE	FALSE	FALSE	FALSE	FALSE	FALSE	FALSE	FALSE	FALSE	FALSE	FALSE
YIL098C	FALSE	0.00873189	0.0594981	0.160331	0.276954	0.189562	0.168006	0.178227	0.0102266	0.0433252	0.174911	0.235114	0.1212	0.136833	0.154332	0.148624	0.0088897	FALSE	FALSE	FALSE	TRUE	FALSE	FALSE	FALSE	FALSE	FALSE	FALSE	FALSE	FALSE	FALSE	FALSE	FALSE	FALSE
YIL021W	FALSE	0.0614035	0.0336817	0.0159986	0.0176072	0.0410542	0.0268797	0.0513688	0.0220401	0.0309597	0.0106636	0.0620943	0.00217244	0.00578522	0.00518531	0.0304852	0.0352856	FALSE	FALSE	FALSE	FALSE	FALSE	FALSE	FALSE	FALSE	FALSE	FALSE	FALSE	FALSE	FALSE	FALSE	FALSE	FALSE
YCR102C	FALSE	0.0578953	0.0549161	0.0856185	0.101254	0.0658961	0.137996	0.0487148	0.0670489	0.0171276	0.075152	0.151844	0.0121193	0.0953939	0.0757239	0.16974	0.13403	FALSE	FALSE	FALSE	FALSE	FALSE	FALSE	FALSE	FALSE	FALSE	FALSE	FALSE	FALSE	FALSE	FALSE	FALSE	FALSE
YLR286C	FALSE	0.150886	0.295551	0.59189	0.680936	0.695607	0.795572	0.836535	1	0.888193	0.157521	0.486185	0.79152	1	1	1	1	FALSE	TRUE	TRUE	TRUE	TRUE	TRUE	TRUE	TRUE	TRUE	FALSE	TRUE	TRUE	TRUE	TRUE	TRUE	TRUE
YOR332W	FALSE	0.0133458	0.00824065	0.0104137	0.0728281	0.0726925	0.0556203	0.0465021	0.00293463	0.0129983	0.0236325	0.00736185	0.0570958	0.0503301	0.0133975	0.040808	0.0628124	FALSE	FALSE	FALSE	FALSE	FALSE	FALSE	FALSE	FALSE	FALSE	FALSE	FALSE	FALSE	FALSE	FALSE	FALSE	FALSE
YNL163C	FALSE	0.00910283	0.0184705	0.0392875	0.034508	0.0564556	0.0874358	0.0511849	0.00167725	0.00872873	0.0311233	0.0456432	0.0104702	0.0451561	0.0345896	0.0513788	0.0325382	FALSE	FALSE	FALSE	FALSE	FALSE	FALSE	FALSE	FALSE	FALSE	FALSE	FALSE	FALSE	FALSE	FALSE	FALSE	FALSE
YDR485C	FALSE	0.0171655	0.0364582	0.0341361	0.0939332	0.0972751	0.0293343	0.00766087	0.0658346	0.106417	0.0461837	0.0577038	0.0300139	0.0650992	0.0365126	0.0193665	0.0044137	FALSE	FALSE	FALSE	FALSE	FALSE	FALSE	FALSE	FALSE	FALSE	FALSE	FALSE	FALSE	FALSE	FALSE	FALSE	FALSE
YLL056C	FALSE	0.0425071	0.0592096	0.015222	0.0974389	0.0254857	0.0257346	0.0492597	0.0323494	0.0547532	0.0342758	0.0140934	0.0112973	0.0262816	0.00964591	0.0156003	0.0847902	FALSE	FALSE	FALSE	FALSE	FALSE	FALSE	FALSE	FALSE	FALSE	FALSE	FALSE	FALSE	FALSE	FALSE	FALSE	FALSE
YDL080C	FALSE	0.0296689	0.00212464	0.0275411	0.0189425	0.0459025	0.0399226	0.0340946	0.0105486	0.00106236	0.00536756	0.0463711	0.0572632	0.0768403	0.00529404	0.0197244	0.0344661	FALSE	FALSE	FALSE	FALSE	FALSE	FALSE	FALSE	FALSE	FALSE	FALSE	FALSE	FALSE	FALSE	FALSE	FALSE	FALSE
YLR143W	FALSE	0.0406896	0.0356027	0.0661566	0.00960993	0.0090799	0.0387082	0.0325692	0.0173883	0.0252674	0.0222078	0.0934791	0.00787318	0.00152704	0.0134721	0.0135807	0.0293167	FALSE	FALSE	FALSE	FALSE	FALSE	FALSE	FALSE	FALSE	FALSE	FALSE	FALSE	FALSE	FALSE	FALSE	FALSE	FALSE
YKR093W	FALSE	0.170425	0.137556	0.125385	0.0433892	0.0339927	0.0718156	0.0818371	0.0449055	0.0302817	0.0967506	0.149756	0.115018	0.111893	0.0862462	0.0924569	0.06533	FALSE	FALSE	FALSE	FALSE	FALSE	FALSE	FALSE	FALSE	FALSE	FALSE	FALSE	FALSE	FALSE	FALSE	FALSE	FALSE
YBR052C	FALSE	0.00172638	0.112047	0.221002	0.228389	0.209716	0.167868	0.0519702	0.00910039	0.0751943	0.147555	0.0914306	0.121505	0.126214	0.123479	0.147391	0.144697	FALSE	FALSE	FALSE	FALSE	FALSE	FALSE	FALSE	FALSE	FALSE	FALSE	FALSE	FALSE	FALSE	FALSE	FALSE	FALSE
YDL248W	FALSE	0.131928	0.0615428	0.0208241	0.0229873	0.0570096	0.0344892	0.081501	0.095725	0.0363714	0.0861322	0.106122	0.0339461	0.0656951	0.0199815	0.031266	0.0458037	FALSE	FALSE	FALSE	FALSE	FALSE	FALSE	FALSE	FALSE	FALSE	FALSE	FALSE	FALSE	FALSE	FALSE	FALSE	FALSE
YER122C	FALSE	0.0277265	0.0104392	0.0767224	0.0918276	0.137768	0.12165	0.0723097	0.0645301	0.0180216	0.0480593	0.0716926	0.0772163	0.0972468	0.103102	0.0764857	0.0334724	FALSE	FALSE	FALSE	FALSE	FALSE	FALSE	FALSE	FALSE	FALSE	FALSE	FALSE	FALSE	FALSE	FALSE	FALSE	FALSE
YHR127W	FALSE	0.118616	0.0978589	0.0458406	0.00488114	0.0177615	0.121631	0.103823	0.120663	0.10921	0.016755	0.102013	0.030205	0.0626437	0.0248077	0.0643719	0.0283288	FALSE	FALSE	FALSE	FALSE	FALSE	FALSE	FALSE	FALSE	FALSE	FALSE	FALSE	FALSE	FALSE	FALSE	FALSE	FALSE
YOR120W	FALSE	0.093092	0.00153452	0.0751124	0.102134	0.1271	0.038524	0.0558932	0.0487202	0.0178768	0.028472	0.0700289	0.0185509	0.0408053	0.0702809	0.054897	0.0721258	FALSE	FALSE	FALSE	FALSE	FALSE	FALSE	FALSE	FALSE	FALSE	FALSE	FALSE	FALSE	FALSE	FALSE	FALSE	FALSE
YOR021C	FALSE	0.0351914	0.0097604	0.0185466	0.0309769	0.0384594	0.0528022	0.0694791	0.0343309	0.0510432	0.00859769	0.0192056	0.0223262	0.00468462	0.0721498	0.071715	0.0565869	FALSE	FALSE	FALSE	FALSE	FALSE	FALSE	FALSE	FALSE	FALSE	FALSE	FALSE	FALSE	FALSE	FALSE	FALSE	FALSE
YHL004W	FALSE	0.00837007	0.0262132	0.0280134	0.0228451	0.00579876	0.0163813	0.0213404	0.0597526	0.0330481	0.0422597	0.0212589	0.0180858	0.0238121	0.0503613	0.00111353	0.0319776	FALSE	FALSE	FALSE	FALSE	FALSE	FALSE	FALSE	FALSE	FALSE	FALSE	FALSE	FALSE	FALSE	FALSE	FALSE	FALSE
YMR134W	FALSE	0.108118	0.0643864	0.114667	0.0483299	0.0550829	0.0247448	0.0278134	0.0424365	0.0818759	0.021533	0.0925561	0.0655287	0.0992495	0.109051	0.0839909	0.0700083	FALSE	FALSE	FALSE	FALSE	FALSE	FALSE	FALSE	FALSE	FALSE	FALSE	FALSE	FALSE	FALSE	FALSE	FALSE	FALSE
YCR020W-B	FALSE	0.0538461	0.0262351	0.0746355	0.0162423	0.0538283	0.027703	0.0485542	0.0355336	0.0985344	0.0522318	0.0238068	0.040021	0.0369807	0.0299579	0.00553275	0.0220595	FALSE	FALSE	FALSE	FALSE	FALSE	FALSE	FALSE	FALSE	FALSE	FALSE	FALSE	FALSE	FALSE	FALSE	FALSE	FALSE
YDL112W	FALSE	0.0294107	0.0186289	0.0407735	0.0671398	0.0672202	0.0799087	0.00882923	0.0104994	0.0412353	0.0547807	0.011281	0.0392438	0.0437047	0.00967032	0.0352891	0.0121797	FALSE	FALSE	FALSE	FALSE	FALSE	FALSE	FALSE	FALSE	FALSE	FALSE	FALSE	FALSE	FALSE	FALSE	FALSE	FALSE
YDR028C	FALSE	0.0765412	0.060856	0.0608594	0.0141715	0.0340468	0.0533422	0.0264614	0.0479422	0.0222112	0.00129987	0.0326649	0.0267533	0.0169474	0.0281481	0.0117157	0.0167334	FALSE	FALSE	FALSE	FALSE	FALSE	FALSE	FALSE	FALSE	FALSE	FALSE	FALSE	FALSE	FALSE	FALSE	FALSE	FALSE
YER009W	FALSE	0.0165017	0.0153104	0.0137236	0.0383612	0.00535332	0.0176289	0.00719176	0.0224152	0.00678232	0.0112206	0.0710587	0.0157554	0.0274607	0.0413378	0.0153747	0.0246195	FALSE	FALSE	FALSE	FALSE	FALSE	FALSE	FALSE	FALSE	FALSE	FALSE	FALSE	FALSE	FALSE	FALSE	FALSE	FALSE
YNL058C	FALSE	0.5447	0.486067	0.552654	0.358786	0.0659102	0.152453	0.329423	0.530007	0.565889	0.506169	0.288005	0.231633	0.142242	0.0248463	0.0750078	0.139882	TRUE	TRUE	TRUE	TRUE	FALSE	FALSE	TRUE	TRUE	TRUE	TRUE	TRUE	FALSE	FALSE	FALSE	FALSE	FALSE
YKL063C	FALSE	0.0124149	0.0121085	0.0100178	0.0055876	0.0165671	0.0121643	0.0518175	0.0243906	0.0456785	0.0159309	0.0769179	0.0135279	0.0106669	0.0330777	0.0317027	0.0309655	FALSE	FALSE	FALSE	FALSE	FALSE	FALSE	FALSE	FALSE	FALSE	FALSE	FALSE	FALSE	FALSE	FALSE	FALSE	FALSE
YGR174C	FALSE	0.0629677	0.081412	0.0828128	0.0862658	0.0926782	0.0603625	0.00545533	0.121054	0.132771	0.144529	0.0316511	0.103846	0.0763288	0.0295269	0.0181882	0.030933	FALSE	FALSE	FALSE	FALSE	FALSE	FALSE	FALSE	FALSE	FALSE	FALSE	FALSE	FALSE	FALSE	FALSE	FALSE	FALSE
YGR169C	FALSE	0.0269915	0.0267121	0.0177032	0.00684602	0.0343743	0.00171386	0.0270119	0.0281442	0.00551306	0.0739729	0.016987	0.0378764	0.00587373	0.0397452	0.0478846	0.0288878	FALSE	FALSE	FALSE	FALSE	FALSE	FALSE	FALSE	FALSE	FALSE	FALSE	FALSE	FALSE	FALSE	FALSE	FALSE	FALSE
YOR080W	FALSE	0.0634805	0.0856929	0.017941	0.0330247	0.0226989	0.0100658	0.00423557	0.0211124	0.0188895	0.0885902	0.0421553	0.0733509	0.0404696	0.0209078	0.0197656	0.00480108	FALSE	FALSE	FALSE	FALSE	FALSE	FALSE	FALSE	FALSE	FALSE	FALSE	FALSE	FALSE	FALSE	FALSE	FALSE	FALSE
YJL121C	FALSE	0.0438169	0.0024893	0.0194111	0.0271891	0.00475017	0.0181836	0.0240324	0.0115919	0.047669	0.0109349	0.0326252	0.0378579	0.00705994	0.0294349	0.0445868	0.0196401	FALSE	FALSE	FALSE	FALSE	FALSE	FALSE	FALSE	FALSE	FALSE	FALSE	FALSE	FALSE	FALSE	FALSE	FALSE	FALSE
YBR076W	FALSE	0.037134	0.0381237	0.0823673	0.0751795	0.0234833	0.0504703	0.0410178	0.0860937	0.129132	0.0413168	0.0747098	0.171109	0.0445715	0.037874	0.0768218	0.0924925	FALSE	FALSE	FALSE	FALSE	FALSE	FALSE	FALSE	FALSE	FALSE	FALSE	FALSE	FALSE	FALSE	FALSE	FALSE	FALSE
YFR017C	FALSE	0.352572	0.232068	0.412827	0.354352	0.358369	0.103821	0.106607	0.198021	0.205335	0.443498	0.221657	0.20064	0.227823	0.103355	0.148748	0.166588	TRUE	FALSE	TRUE	TRUE	TRUE	FALSE	FALSE	FALSE	FALSE	TRUE	FALSE	FALSE	FALSE	FALSE	FALSE	FALSE
YKL002W	FALSE	0.0319856	0.0589331	0.0177758	0.0781689	0.0487424	0.0669735	0.0518625	0.0292903	0.0378358	0.0628013	0.080689	0.079835	0.0661852	0.00306073	0.0133076	0.0162545	FALSE	FALSE	FALSE	FALSE	FALSE	FALSE	FALSE	FALSE	FALSE	FALSE	FALSE	FALSE	FALSE	FALSE	FALSE	FALSE
YDR416W	FALSE	0.0637156	0.039792	0.0711479	0.0106084	0.0270898	0.00768236	0.0460089	0.025438	0.036146	0.0162195	0.0261793	0.0114502	0.0159182	0.0683194	0.0040187	0.024069	FALSE	FALSE	FALSE	FALSE	FALSE	FALSE	FALSE	FALSE	FALSE	FALSE	FALSE	FALSE	FALSE	FALSE	FALSE	FALSE
YKL064W	FALSE	0.00200128	0.0173705	0.0267657	0.0344748	0.00531938	0.0113762	0.0358742	0.0340145	0.0143124	0.00550939	0.0430491	0.0141678	0.0362105	0.0181226	0.0224041	0.0255532	FALSE	FALSE	FALSE	FALSE	FALSE	FALSE	FALSE	FALSE	FALSE	FALSE	FALSE	FALSE	FALSE	FALSE	FALSE	FALSE
YJR087W	FALSE	0.0626457	0.0511604	0.0904245	0.0344984	0.00363956	0.00923658	0.0159123	0.0330912	0.0731418	0.0211091	0.123138	0.0171864	0.0140896	0.0140796	0.0184721	0.00942049	FALSE	FALSE	FALSE	FALSE	FALSE	FALSE	FALSE	FALSE	FALSE	FALSE	FALSE	FALSE	FALSE	FALSE	FALSE	FALSE
YML105C	FALSE	0.0360155	0.0185013	0.0215959	0.0520861	0.0458324	0.0138089	0.0236377	0.0275049	0.0191522	0.0273661	0.0470157	0.0288109	0.0355318	0.0198315	0.0229836	0.00439732	FALSE	FALSE	FALSE	FALSE	FALSE	FALSE	FALSE	FALSE	FALSE	FALSE	FALSE	FALSE	FALSE	FALSE	FALSE	FALSE
YJR088C	FALSE	0.0465446	0.0301135	0.0695348	0.0172436	0.0293001	0.0536537	0.0366075	0.0394722	0.0676273	0.0292782	0.0105265	0.0204537	0.0137757	0.0314456	0.0359245	0.00285757	FALSE	FALSE	FALSE	FALSE	FALSE	FALSE	FALSE	FALSE	FALSE	FALSE	FALSE	FALSE	FALSE	FALSE	FALSE	FALSE
YOR211C	FALSE	0.0653419	0.0348844	0.0212378	0.0181301	0.0140132	0.0483053	0.0500731	0.031822	0.0635011	0.0120967	0.0197107	0.00252646	0.00314766	0.00274541	0.0395536	0.0219362	FALSE	FALSE	FALSE	FALSE	FALSE	FALSE	FALSE	FALSE	FALSE	FALSE	FALSE	FALSE	FALSE	FALSE	FALSE	FALSE
YDL181W	FALSE	0.0726546	0.113398	0.238299	0.177336	0.103177	0.0862695	0.0356869	0.115055	0.121827	0.190742	0.127663	0.0616598	0.0745184	0.0976019	0.0150617	0.0432589	FALSE	FALSE	FALSE	FALSE	FALSE	FALSE	FALSE	FALSE	FALSE	FALSE	FALSE	FALSE	FALSE	FALSE	FALSE	FALSE
YDL070W	FALSE	0.090091	0.0417566	0.0805602	0.0334908	0.0937978	0.0861385	0.0638554	0.062365	0.0524856	0.0294555	0.0573425	0.102534	0.13805	0.0819539	0.0891134	0.0695325	FALSE	FALSE	FALSE	FALSE	FALSE	FALSE	FALSE	FALSE	FALSE	FALSE	FALSE	FALSE	FALSE	FALSE	FALSE	FALSE
YER032W	FALSE	0.191878	0.0151832	0.136323	0.224063	0.241064	0.271147	0.20706	0.151103	0.0558822	0.06663	0.112594	0.170157	0.245094	0.174943	0.104266	0.0788635	FALSE	FALSE	FALSE	FALSE	FALSE	TRUE	FALSE	FALSE	FALSE	FALSE	FALSE	FALSE	FALSE	FALSE	FALSE	FALSE
YJL141C	FALSE	0.164934	0.126478	0.160914	0.104396	0.0876675	0.00253757	0.032679	0.028066	0.0483676	0.0739575	0.101001	0.0915242	0.12022	0.0934046	0.0617274	0.0561385	FALSE	FALSE	FALSE	FALSE	FALSE	FALSE	FALSE	FALSE	FALSE	FALSE	FALSE	FALSE	FALSE	FALSE	FALSE	FALSE
YKL207W	FALSE	0.0188205	0.0196799	0.0772006	0.0329625	0.0493434	0.0403772	0.0321319	0.0140043	0.039921	0.0189278	0.0094645	0.0287787	0.0390804	0.043076	0.0856628	0.0657657	FALSE	FALSE	FALSE	FALSE	FALSE	FALSE	FALSE	FALSE	FALSE	FALSE	FALSE	FALSE	FALSE	FALSE	FALSE	FALSE
YBR081C	FALSE	0.0738125	0.0679337	0.00239447	0.00122993	0.0359411	0.0346389	0.0283057	0.0525225	0.0409629	0.00286591	0.0056099	0.0307424	0.0321119	0.0212691	0.032157	0.00819197	FALSE	FALSE	FALSE	FALSE	FALSE	FALSE	FALSE	FALSE	FALSE	FALSE	FALSE	FALSE	FALSE	FALSE	FALSE	FALSE
YPL145C	FALSE	0.00702061	0.0185126	0.0548259	0.0375308	0.0640529	0.057126	0.0379397	0.0271287	0.0364645	0.0705873	0.125392	0.0534512	0.0533525	0.0229436	0.0134819	0.0116637	FALSE	FALSE	FALSE	FALSE	FALSE	FALSE	FALSE	FALSE	FALSE	FALSE	FALSE	FALSE	FALSE	FALSE	FALSE	FALSE
YOR106W	FALSE	0.0620274	0.00145305	0.0481229	0.0624723	0.0432695	0.0634677	0.0520542	0.0138738	0.00116647	0.0456038	0.0315238	0.0577539	0.0458417	0.0334331	0.0280073	0.012887	FALSE	FALSE	FALSE	FALSE	FALSE	FALSE	FALSE	FALSE	FALSE	FALSE	FALSE	FALSE	FALSE	FALSE	FALSE	FALSE
YOR083W	TRUE	0.0906736	0.0882098	0.190466	0.188937	0.174531	0.202706	0.142627	0.0288468	0.0743501	0.128397	0.201046	0.141296	0.0185096	0.269675	0.15552	0.0520639	FALSE	FALSE	FALSE	FALSE	FALSE	FALSE	FALSE	FALSE	FALSE	FALSE	FALSE	FALSE	FALSE	TRUE	FALSE	FALSE
YDR415C	FALSE	0.0505619	0.0383313	0.0674969	0.0143156	0.0138948	0.0139642	0.0332152	0.0324257	0.0177916	0.0198604	0.0572429	0.0110745	0.0205779	0.0711362	0.0521933	0.025569	FALSE	FALSE	FALSE	FALSE	FALSE	FALSE	FALSE	FALSE	FALSE	FALSE	FALSE	FALSE	FALSE	FALSE	FALSE	FALSE
YIL120W	FALSE	0.0373328	0.0514489	0.00179454	0.0105204	0.0541261	0.0238937	0.0943378	0.0553601	0.066117	0.0349571	0.013859	0.00555671	0.00127816	0.0624845	0.0389976	0.0214267	FALSE	FALSE	FALSE	FALSE	FALSE	FALSE	FALSE	FALSE	FALSE	FALSE	FALSE	FALSE	FALSE	FALSE	FALSE	FALSE
YML041C	FALSE	0.0407901	0.0141068	0.0104057	0.0242136	0.0467694	0.0536099	0.0426551	0.0157023	0.00996795	0.0231668	0.050243	0.0223925	0.0526052	0.0267097	0.0528109	0.00789814	FALSE	FALSE	FALSE	FALSE	FALSE	FALSE	FALSE	FALSE	FALSE	FALSE	FALSE	FALSE	FALSE	FALSE	FALSE	FALSE
YDR454C	FALSE	0.0533719	0.00478055	0.00542754	0.00917862	0.0105023	0.0167073	0.0407625	0.00766394	0.00562816	0.0184607	0.030309	0.0374958	0.0313029	0.0303023	0.0181323	0.00544046	FALSE	FALSE	FALSE	FALSE	FALSE	FALSE	FALSE	FALSE	FALSE	FALSE	FALSE	FALSE	FALSE	FALSE	FALSE	FALSE
YLL006W	FALSE	0.120802	0.0945959	0.0507604	0.0136676	0.0473209	0.0852812	0.0846591	0.0977376	0.0819602	0.0582724	0.0100209	0.0120721	0.0246335	0.030104	0.0335761	0.00382333	FALSE	FALSE	FALSE	FALSE	FALSE	FALSE	FALSE	FALSE	FALSE	FALSE	FALSE	FALSE	FALSE	FALSE	FALSE	FALSE
YHR139C	FALSE	0.164095	0.046054	0.0435295	0.231893	0.277471	0.256206	0.263616	0.14593	0.0225361	0.0360568	0.18393	0.110573	0.202062	0.105972	0.154895	0.0393239	FALSE	FALSE	FALSE	FALSE	TRUE	TRUE	TRUE	FALSE	FALSE	FALSE	FALSE	FALSE	FALSE	FALSE	FALSE	FALSE
YGR203W	FALSE	0.0556762	0.0204643	0.0700488	0.0741929	0.0646362	0.0846115	0.0980944	0.126996	0.0160665	0.0885596	0.129487	0.0482243	0.0249573	0.0914546	0.0387749	0.00570826	FALSE	FALSE	FALSE	FALSE	FALSE	FALSE	FALSE	FALSE	FALSE	FALSE	FALSE	FALSE	FALSE	FALSE	FALSE	FALSE
YER035W	FALSE	0.00842175	0.0213689	0.00288274	0.0291501	0.0375713	0.0820552	0.050885	0.0291393	0.0582034	0.138258	0.0160281	0.0149352	0.0589574	0.0500835	0.00662246	0.0175531	FALSE	FALSE	FALSE	FALSE	FALSE	FALSE	FALSE	FALSE	FALSE	FALSE	FALSE	FALSE	FALSE	FALSE	FALSE	FALSE
YOL008W	FALSE	0.0825746	0.0879806	0.100117	0.0394682	0.00510308	0.00370526	0.0885234	0.0539346	0.062712	0.0806043	0.0289519	0.0263639	0.0155192	0.00242292	0.00720728	0.0102488	FALSE	FALSE	FALSE	FALSE	FALSE	FALSE	FALSE	FALSE	FALSE	FALSE	FALSE	FALSE	FALSE	FALSE	FALSE	FALSE
YNL165W	FALSE	0.20617	0.182486	0.218849	0.131095	0.0461182	0.0264834	0.094709	0.21856	0.325236	0.202235	0.140236	0.047593	0.00259773	0.0121849	0.00505245	0.0486739	FALSE	FALSE	FALSE	FALSE	FALSE	FALSE	FALSE	FALSE	TRUE	FALSE	FALSE	FALSE	FALSE	FALSE	FALSE	FALSE
YIR044C	FALSE	0.0473976	0.191062	0.0175667	0.0454061	0.114951	0.114345	0.240458	0.163995	0.371851	0.179395	0.196291	0.00779702	0.10403	0.349861	0.242049	0.126215	FALSE	FALSE	FALSE	FALSE	FALSE	FALSE	FALSE	FALSE	TRUE	FALSE	FALSE	FALSE	FALSE	TRUE	FALSE	FALSE
YLR228C	FALSE	0.244393	0.118873	0.122047	0.00703339	0.00676339	0.0558149	0.0343751	0.0349814	0.0255084	0.00216334	0.026585	0.0609735	0.0930598	0.0764859	0.0922225	0.0955286	FALSE	FALSE	FALSE	FALSE	FALSE	FALSE	FALSE	FALSE	FALSE	FALSE	FALSE	FALSE	FALSE	FALSE	FALSE	FALSE
YDL025C	FALSE	0.0787823	0.0941891	0.0157376	0.0322275	0.0612909	0.0918927	0.0677222	0.0661877	0.0269478	0.00119742	0.0370131	0.00685655	0.0193664	0.0496028	0.0348389	0.00276193	FALSE	FALSE	FALSE	FALSE	FALSE	FALSE	FALSE	FALSE	FALSE	FALSE	FALSE	FALSE	FALSE	FALSE	FALSE	FALSE
YHR195W	FALSE	0.038184	0.0543763	0.0977872	0.145006	0.0800567	0.07045	0.0313608	0.0401948	0.0132012	0.0931571	0.10065	0.0739274	0.0478365	0.123854	0.0830825	0.00946183	FALSE	FALSE	FALSE	FALSE	FALSE	FALSE	FALSE	FALSE	FALSE	FALSE	FALSE	FALSE	FALSE	FALSE	FALSE	FALSE
YNL124W	FALSE	0.0535368	0.054757	0.107313	0.0238858	0.0293866	0.0412304	0.0444354	0.0342151	0.0459975	0.0648567	0.00565897	0.00657145	0.0583832	0.0414615	0.0608366	0.0732012	FALSE	FALSE	FALSE	FALSE	FALSE	FALSE	FALSE	FALSE	FALSE	FALSE	FALSE	FALSE	FALSE	FALSE	FALSE	FALSE
YMR108W	FALSE	0.130647	0.0845898	0.0903356	0.0797944	0.0620747	0.0617197	0.0369473	0.0387078	0.0472344	0.0936079	0.0320294	0.0879962	0.0922911	0.0639683	0.068143	0.0686495	FALSE	FALSE	FALSE	FALSE	FALSE	FALSE	FALSE	FALSE	FALSE	FALSE	FALSE	FALSE	FALSE	FALSE	FALSE	FALSE
YFR018C	FALSE	0.0878279	0.102363	0.155447	0.153083	0.117053	0.0540547	0.0405952	0.0294559	0.0477398	0.0257779	0.133466	0.145477	0.0159313	0.158535	0.120423	0.0740344	FALSE	FALSE	FALSE	FALSE	FALSE	FALSE	FALSE	FALSE	FALSE	FALSE	FALSE	FALSE	FALSE	FALSE	FALSE	FALSE
YGL205W	FALSE	0.0785456	0.044613	0.0363987	0.00677169	0.0461252	0.100303	0.00835578	0.104049	0.109886	0.0856497	0.0443483	0.0404529	0.0434977	0.0807157	0.0510106	0.00511633	FALSE	FALSE	FALSE	FALSE	FALSE	FALSE	FALSE	FALSE	FALSE	FALSE	FALSE	FALSE	FALSE	FALSE	FALSE	FALSE
YGL141W	FALSE	0.0265317	0.0490245	0.175211	0.138438	0.0642488	0.0250528	0.0256776	0.00978401	0.0808939	0.0675007	0.0169263	0.0310641	0.0379818	0.0491432	0.0553911	0.0741279	FALSE	FALSE	FALSE	FALSE	FALSE	FALSE	FALSE	FALSE	FALSE	FALSE	FALSE	FALSE	FALSE	FALSE	FALSE	FALSE
YKL016C	FALSE	0.0949574	0.110205	0.166577	0.107155	0.0936731	0.0208993	0.0426313	0.0492752	0.0709003	0.141934	0.138367	0.0596954	0.0527131	0.0594579	0.0510584	0.00297478	FALSE	FALSE	FALSE	FALSE	FALSE	FALSE	FALSE	FALSE	FALSE	FALSE	FALSE	FALSE	FALSE	FALSE	FALSE	FALSE
YKL124W	FALSE	0.0356107	0.0312907	0.00263336	0.0103327	0.00935858	0.0128391	0.0242706	0.00293695	0.0457092	0.0178132	0.00680562	0.00496654	0.00966086	0.00893924	0.0281445	0.0255387	FALSE	FALSE	FALSE	FALSE	FALSE	FALSE	FALSE	FALSE	FALSE	FALSE	FALSE	FALSE	FALSE	FALSE	FALSE	FALSE
YPR040W	FALSE	0.0266085	0.0345182	0.0353506	0.0262811	0.0712242	0.0329357	0.0550339	0.0905868	0.0435725	0.0110842	0.0213641	0.0311307	0.0270385	0.0771165	0.0538577	0.0616819	FALSE	FALSE	FALSE	FALSE	FALSE	FALSE	FALSE	FALSE	FALSE	FALSE	FALSE	FALSE	FALSE	FALSE	FALSE	FALSE
YMR007W	FALSE	0.129589	0.0280708	0.0689767	0.130508	0.235501	0.20703	0.218536	0.0691731	0.100999	0.0972714	0.124452	0.018097	0.133348	0.126544	0.131711	0.120553	FALSE	FALSE	FALSE	FALSE	FALSE	FALSE	FALSE	FALSE	FALSE	FALSE	FALSE	FALSE	FALSE	FALSE	FALSE	FALSE
YMR297W	FALSE	0.0888501	0.0495835	0.0178766	0.0697324	0.119026	0.175126	0.164929	0.134309	0.0992014	0.0550735	0.0318635	0.0572426	0.10823	0.119835	0.146284	0.137469	FALSE	FALSE	FALSE	FALSE	FALSE	FALSE	FALSE	FALSE	FALSE	FALSE	FALSE	FALSE	FALSE	FALSE	FALSE	FALSE
YPR204W	FALSE	0.14914	0.0800446	0.0425629	0.0651484	0.490802	0.35991	0.0947407	0.198013	0.112959	0.0888722	0.14061	0.0516366	0.146555	0.277349	0.228136	0.140223	FALSE	FALSE	FALSE	FALSE	TRUE	TRUE	FALSE	FALSE	FALSE	FALSE	FALSE	FALSE	FALSE	TRUE	FALSE	FALSE
YER134C	FALSE	0.0111758	0.0129226	0.0272276	0.0027046	0.013696	0.017999	0.0296183	0.00673586	0.0292491	0.0179622	0.0178221	0.018863	0.0096792	0.0021223	0.0186887	0.0130181	FALSE	FALSE	FALSE	FALSE	FALSE	FALSE	FALSE	FALSE	FALSE	FALSE	FALSE	FALSE	FALSE	FALSE	FALSE	FALSE
YDR066C	FALSE	0.033393	0.021912	0.074923	0.00505104	0.0173038	0.0424071	0.0394733	0.0106828	0.0215682	0.0205475	0.0476196	0.0134812	0.0268141	0.0487723	0.0469392	0.0345181	FALSE	FALSE	FALSE	FALSE	FALSE	FALSE	FALSE	FALSE	FALSE	FALSE	FALSE	FALSE	FALSE	FALSE	FALSE	FALSE
YLR068W	FALSE	0.00656269	0.0348778	0.0677304	0.0447397	0.0216864	0.0281192	0.0449065	0.0564388	0.0260315	0.0328894	0.0221102	0.0511415	0.0267132	0.0724299	0.0560218	0.0243512	FALSE	FALSE	FALSE	FALSE	FALSE	FALSE	FALSE	FALSE	FALSE	FALSE	FALSE	FALSE	FALSE	FALSE	FALSE	FALSE
YGR033C	FALSE	0.0359854	0.0404376	0.00781861	0.024728	0.0603835	0.0622433	0.0475903	0.0167554	0.0153202	0.0374946	0.00666148	0.0268444	0.0431533	0.0072597	0.0253612	0.0350109	FALSE	FALSE	FALSE	FALSE	FALSE	FALSE	FALSE	FALSE	FALSE	FALSE	FALSE	FALSE	FALSE	FALSE	FALSE	FALSE
YPR077C	FALSE	0.0960073	0.169779	0.1232	0.182045	0.16829	0.0447574	0.138217	0.121432	0.289737	0.201083	0.0260513	0.055558	0.042456	0.0705932	0.057223	0.0449834	FALSE	FALSE	FALSE	FALSE	FALSE	FALSE	FALSE	FALSE	TRUE	FALSE	FALSE	FALSE	FALSE	FALSE	FALSE	FALSE
YOL013W-A	FALSE	0.0210761	0.105355	0.286082	0.107589	0.0968396	0.0185742	0.0404119	0.0904652	0.236347	0.165494	0.29115	0.00788416	0.00785211	0.124518	0.139088	0.0412673	FALSE	FALSE	TRUE	FALSE	FALSE	FALSE	FALSE	FALSE	FALSE	FALSE	TRUE	FALSE	FALSE	FALSE	FALSE	FALSE
YLR154C	FALSE	0.0689579	0.116616	0.124582	0.121371	0.0238992	0.0839083	0.0644894	0.185238	0.239375	0.076132	0.0926842	0.00885791	0.00600763	0.0268687	0.0406391	0.0733717	FALSE	FALSE	FALSE	FALSE	FALSE	FALSE	FALSE	FALSE	FALSE	FALSE	FALSE	FALSE	FALSE	FALSE	FALSE	FALSE
YKL029C	FALSE	0.373437	0.347188	0.416596	0.320396	0.152192	0.0459654	0.100039	0.275941	0.307476	0.28477	0.211562	0.210046	0.153208	0.138439	0.147541	0.0872349	TRUE	TRUE	TRUE	TRUE	FALSE	FALSE	FALSE	TRUE	TRUE	TRUE	FALSE	FALSE	FALSE	FALSE	FALSE	FALSE
YER058W	FALSE	0.112851	0.1686	0.208233	0.164381	0.0765656	0.178743	0.107437	0.1043	0.0754046	0.176075	0.185791	0.135493	0.119906	0.138657	0.102123	0.0499938	FALSE	FALSE	FALSE	FALSE	FALSE	FALSE	FALSE	FALSE	FALSE	FALSE	FALSE	FALSE	FALSE	FALSE	FALSE	FALSE
YGR139W	FALSE	0.0919807	0.0682629	0.10015	0.350178	0.153603	0.0257769	0.140492	0.113367	0.269534	0.117872	0.144598	0.195045	0.164626	0.0639418	0.174325	0.0774151	FALSE	FALSE	FALSE	TRUE	FALSE	FALSE	FALSE	FALSE	TRUE	FALSE	FALSE	FALSE	FALSE	FALSE	FALSE	FALSE
YDR034C-C	FALSE	0.066333	0.0393932	0.0248144	0.0826676	0.0382656	0.0910641	0.0234453	0.0786641	0.0904338	0.0348004	0.0836204	0.0485053	0.159975	0.0844246	0.134228	0.232919	FALSE	FALSE	FALSE	FALSE	FALSE	FALSE	FALSE	FALSE	FALSE	FALSE	FALSE	FALSE	FALSE	FALSE	FALSE	FALSE
YKL082C	FALSE	0.00659455	0.0203849	0.0259612	0.0450166	0.0113256	0.0085175	0.0360315	0.0429202	0.0311367	0.0177306	0.026181	0.0815926	0.0422053	0.0663174	0.0605252	0.017994	FALSE	FALSE	FALSE	FALSE	FALSE	FALSE	FALSE	FALSE	FALSE	FALSE	FALSE	FALSE	FALSE	FALSE	FALSE	FALSE
YFR030W	FALSE	0.0261808	0.0171186	0.0789713	0.173992	0.195598	0.125007	0.0754021	0.00442205	0.0223509	0.0902076	0.10173	0.0900519	0.0837969	0.120749	0.0749266	0.0375685	FALSE	FALSE	FALSE	FALSE	FALSE	FALSE	FALSE	FALSE	FALSE	FALSE	FALSE	FALSE	FALSE	FALSE	FALSE	FALSE
YKL185W	FALSE	0.178491	0.245854	0.470552	0.50595	0.560452	0.681519	0.590823	0.353116	0.321247	0.720515	0.624525	0.55463	0.505217	0.388825	0.254367	0.199802	FALSE	FALSE	TRUE	TRUE	TRUE	TRUE	TRUE	TRUE	TRUE	TRUE	TRUE	TRUE	TRUE	TRUE	TRUE	FALSE
YLR243W	FALSE	0.00203825	0.011825	0.0244827	0.0137125	0.00803595	0.0287271	0.0329046	0.0523125	0.0183039	0.0354021	0.0747122	0.0368297	0.0564846	0.0122275	0.0339322	0.0762065	FALSE	FALSE	FALSE	FALSE	FALSE	FALSE	FALSE	FALSE	FALSE	FALSE	FALSE	FALSE	FALSE	FALSE	FALSE	FALSE
YMR073C	FALSE	0.0426034	0.0296884	0.0181362	0.0268352	0.0495652	0.0532152	0.0752212	0.075425	0.0273862	0.0708881	0.0214774	0.0734864	0.0499857	0.0658024	0.0188904	0.0567795	FALSE	FALSE	FALSE	FALSE	FALSE	FALSE	FALSE	FALSE	FALSE	FALSE	FALSE	FALSE	FALSE	FALSE	FALSE	FALSE
YBR094W	FALSE	0.0614971	0.0207821	0.00678725	0.0213553	0.0689785	0.0666338	0.0549949	0.0524642	0.0755133	0.0307342	0.00404009	0.0200301	0.0522485	0.0399196	0.0426772	0.0645384	FALSE	FALSE	FALSE	FALSE	FALSE	FALSE	FALSE	FALSE	FALSE	FALSE	FALSE	FALSE	FALSE	FALSE	FALSE	FALSE
YBL039W-B	FALSE	0.0618523	0.0570925	0.0939448	0.0276296	0.010401	0.0232818	0.123812	0.0768285	0.00980257	0.0214986	0.0208687	0.0655097	0.0647537	0.0823649	0.0875993	0.0522904	FALSE	FALSE	FALSE	FALSE	FALSE	FALSE	FALSE	FALSE	FALSE	FALSE	FALSE	FALSE	FALSE	FALSE	FALSE	FALSE
YBL032W	FALSE	0.209375	0.0788437	0.0561078	0.154426	0.177629	0.218955	0.219609	0.19177	0.125195	0.0618061	0.133604	0.146408	0.125388	0.15878	0.0950573	0.0405043	FALSE	FALSE	FALSE	FALSE	FALSE	FALSE	FALSE	FALSE	FALSE	FALSE	FALSE	FALSE	FALSE	FALSE	FALSE	FALSE
YBR107C	FALSE	0.0363757	0.0389644	0.00785863	0.0499016	0.0438339	0.0447915	0.00937476	0.0349362	0.0556548	0.02957	0.0671365	0.0378613	0.0135661	0.00123637	0.00834505	0.00170841	FALSE	FALSE	FALSE	FALSE	FALSE	FALSE	FALSE	FALSE	FALSE	FALSE	FALSE	FALSE	FALSE	FALSE	FALSE	FALSE
YDL164C	FALSE	0.319191	0.256961	0.228771	0.0357965	0.104776	0.268966	0.381262	0.48298	0.341417	0.18748	0.00599685	0.102802	0.1504	0.112393	0.0947612	0.0732322	TRUE	TRUE	FALSE	FALSE	FALSE	TRUE	TRUE	TRUE	TRUE	FALSE	FALSE	FALSE	FALSE	FALSE	FALSE	FALSE
YEL071W	FALSE	0.233231	0.135572	0.0755712	0.00353677	0.106635	0.167992	0.192945	0.228621	0.154036	0.10715	0.00326957	0.0402944	0.00833461	0.0717664	0.106453	0.134484	FALSE	FALSE	FALSE	FALSE	FALSE	FALSE	FALSE	FALSE	FALSE	FALSE	FALSE	FALSE	FALSE	FALSE	FALSE	FALSE
YMR244C-A	FALSE	0.070713	0.0109266	0.0728434	0.0284728	0.0143903	0.00939586	0.0147259	0.0415262	0.0208278	0.0213184	0.0604897	0.0715509	0.0149161	0.013814	0.0835035	0.0383211	FALSE	FALSE	FALSE	FALSE	FALSE	FALSE	FALSE	FALSE	FALSE	FALSE	FALSE	FALSE	FALSE	FALSE	FALSE	FALSE
YMR280C	FALSE	0.0610679	0.066845	0.0800187	0.0279825	0.0388513	0.0622108	0.0178373	0.0357702	0.0316635	0.0103252	0.0737269	0.0801502	0.0846498	0.00162716	0.01349	0.0484543	FALSE	FALSE	FALSE	FALSE	FALSE	FALSE	FALSE	FALSE	FALSE	FALSE	FALSE	FALSE	FALSE	FALSE	FALSE	FALSE
YGL255W	FALSE	0.016203	0.0342022	0.0464043	0.0741912	0.0513335	0.00988226	0.0105866	0.013644	0.0341956	0.0785999	0.0748757	0.0240056	0.0648296	0.00172599	0.00929606	0.0643337	FALSE	FALSE	FALSE	FALSE	FALSE	FALSE	FALSE	FALSE	FALSE	FALSE	FALSE	FALSE	FALSE	FALSE	FALSE	FALSE
YMR045C	FALSE	0.0589209	0.0584831	0.136967	0.0165097	0.0185338	0.0634076	0.0192973	0.0159835	0.00804227	0.0164078	0.06069	0.0487573	0.0200219	0.0290302	0.0506351	0.0057438	FALSE	FALSE	FALSE	FALSE	FALSE	FALSE	FALSE	FALSE	FALSE	FALSE	FALSE	FALSE	FALSE	FALSE	FALSE	FALSE
YNR012W	FALSE	0.0442323	0.0555825	0.0999359	0.121931	0.0896017	0.0699619	0.0605787	0.0191092	0.0604541	0.103542	0.00279031	0.0998803	0.08167	0.060301	0.058742	0.0763707	FALSE	FALSE	FALSE	FALSE	FALSE	FALSE	FALSE	FALSE	FALSE	FALSE	FALSE	FALSE	FALSE	FALSE	FALSE	FALSE
YEL062W	FALSE	0.0456282	0.0173389	0.0493485	0.0262856	0.00838562	0.021661	0.00797733	0.020637	0.00869488	0.00312531	0.00849867	0.00668323	0.0301321	0.013913	0.0218662	0.0111937	FALSE	FALSE	FALSE	FALSE	FALSE	FALSE	FALSE	FALSE	FALSE	FALSE	FALSE	FALSE	FALSE	FALSE	FALSE	FALSE
YER117W	FALSE	0.016024	0.0240754	0.0281532	0.00289335	0.0584234	0.0513632	0.0236025	0.00438436	0.0115685	0.00956858	0.0554946	0.0413551	0.0570678	0.0314955	0.010779	0.0444193	FALSE	FALSE	FALSE	FALSE	FALSE	FALSE	FALSE	FALSE	FALSE	FALSE	FALSE	FALSE	FALSE	FALSE	FALSE	FALSE
YGR076C	FALSE	0.0331015	0.0164646	0.015614	0.0573859	0.109845	0.0481634	0.0456315	0.0243037	0.0237994	0.0357007	0.0292549	0.0499973	0.0416403	0.00703676	0.0283892	0.0204443	FALSE	FALSE	FALSE	FALSE	FALSE	FALSE	FALSE	FALSE	FALSE	FALSE	FALSE	FALSE	FALSE	FALSE	FALSE	FALSE
YDR260C	TRUE	0.00894409	0.0533206	0.0567872	0.0276738	0.00864336	0.0277119	0.0386076	0.126555	0.03636	0.0104998	0.0530472	0.00498507	0.0332048	0.048107	0.0351697	0.00943594	FALSE	FALSE	FALSE	FALSE	FALSE	FALSE	FALSE	FALSE	FALSE	FALSE	FALSE	FALSE	FALSE	FALSE	FALSE	FALSE
YOR201C	FALSE	0.0448117	0.0312049	0.0497426	0.0134702	0.0206306	0.0435319	0.0217892	0.0324463	0.00212755	0.0695953	0.0258643	0.0108382	0.005324	0.0353533	0.0253406	0.0301705	FALSE	FALSE	FALSE	FALSE	FALSE	FALSE	FALSE	FALSE	FALSE	FALSE	FALSE	FALSE	FALSE	FALSE	FALSE	FALSE
YJL036W	FALSE	0.0288597	0.0471777	0.0288079	0.076072	0.0434502	0.0321345	0.0327409	0.0481943	0.0827172	0.0473352	0.0287994	0.0746553	0.0569346	0.0144451	0.00807353	0.0332932	FALSE	FALSE	FALSE	FALSE	FALSE	FALSE	FALSE	FALSE	FALSE	FALSE	FALSE	FALSE	FALSE	FALSE	FALSE	FALSE
YNL158W	FALSE	0.0466345	0.00755945	0.0707575	0.00412162	0.0325271	0.0535452	0.0222626	0.0629134	0.00636566	0.0294975	0.0871241	0.0467258	0.0395466	0.0149669	0.00200998	0.0222235	FALSE	FALSE	FALSE	FALSE	FALSE	FALSE	FALSE	FALSE	FALSE	FALSE	FALSE	FALSE	FALSE	FALSE	FALSE	FALSE
YPL054W	FALSE	0.0146494	0.0304502	0.023211	0.00106141	0.119539	0.0311416	0.0647021	0.0732373	0.0834964	0.0389809	0.024013	0.0771335	0.0307304	0.0882951	0.0319279	0.0407521	FALSE	FALSE	FALSE	FALSE	FALSE	FALSE	FALSE	FALSE	FALSE	FALSE	FALSE	FALSE	FALSE	FALSE	FALSE	FALSE
YJR066W	FALSE	0.0189806	0.0250625	0.0381102	0.0251569	0.0183462	0.0109565	0.0118081	0.0411406	0.0350814	0.031982	0.00276034	0.0284894	0.0122433	0.00511248	0.0143153	0.0212693	FALSE	FALSE	FALSE	FALSE	FALSE	FALSE	FALSE	FALSE	FALSE	FALSE	FALSE	FALSE	FALSE	FALSE	FALSE	FALSE
YER019W	FALSE	0.0487177	0.0605432	0.0720431	0.124661	0.0889321	0.0624734	0.0413441	0.0604615	0.116525	0.127679	0.140715	0.121752	0.0568954	0.00121461	0.0169594	0.0457889	FALSE	FALSE	FALSE	FALSE	FALSE	FALSE	FALSE	FALSE	FALSE	FALSE	FALSE	FALSE	FALSE	FALSE	FALSE	FALSE
YKL122C	FALSE	0.0121494	0.00240518	0.0169513	0.0100392	0.0313287	0.0302333	0.0110286	0.0689772	0.0100756	0.0415672	0.0773017	0.0121476	0.0205817	0.0862342	0.0377495	0.0039121	FALSE	FALSE	FALSE	FALSE	FALSE	FALSE	FALSE	FALSE	FALSE	FALSE	FALSE	FALSE	FALSE	FALSE	FALSE	FALSE
YNL290W	FALSE	0.1223	0.0996364	0.106482	0.00427974	0.057108	0.0623808	0.0838937	0.0866745	0.0870447	0.0735464	0.0768505	0.0136542	0.0135126	0.00442226	0.0456452	0.0135925	FALSE	FALSE	FALSE	FALSE	FALSE	FALSE	FALSE	FALSE	FALSE	FALSE	FALSE	FALSE	FALSE	FALSE	FALSE	FALSE
YDL127W	TRUE	0.112636	0.0791045	0.0187831	0.0641783	0.02489	0.128357	0.296421	0.467122	0.33296	0.0604784	0.0921423	0.106766	0.141979	0.148208	0.138853	0.126716	FALSE	FALSE	FALSE	FALSE	FALSE	FALSE	TRUE	TRUE	TRUE	FALSE	FALSE	FALSE	FALSE	FALSE	FALSE	FALSE
YCR017C	FALSE	0.050269	0.0449644	0.0973272	0.0318833	0.0129983	0.0137689	0.0189249	0.0535051	0.0630441	0.0417189	0.0344789	0.00173431	0.0124521	0.0326888	0.0353539	0.00178531	FALSE	FALSE	FALSE	FALSE	FALSE	FALSE	FALSE	FALSE	FALSE	FALSE	FALSE	FALSE	FALSE	FALSE	FALSE	FALSE
YOL043C	FALSE	0.0198268	0.04973	0.0911355	0.092185	0.0550915	0.0218581	0.0332126	0.0725918	0.0752672	0.110911	0.110943	0.0158131	0.070363	0.0178748	0.00859319	0.0256835	FALSE	FALSE	FALSE	FALSE	FALSE	FALSE	FALSE	FALSE	FALSE	FALSE	FALSE	FALSE	FALSE	FALSE	FALSE	FALSE
YML011C	FALSE	0.00994026	0.00864775	0.0032555	0.0213232	0.0155933	0.00909015	0.0813679	0.0257447	0.0271171	0.0221668	0.00160129	0.0180565	0.0160971	0.0257681	0.00405602	0.0504727	FALSE	FALSE	FALSE	FALSE	FALSE	FALSE	FALSE	FALSE	FALSE	FALSE	FALSE	FALSE	FALSE	FALSE	FALSE	FALSE
YFR006W	FALSE	0.0133041	0.00581807	0.0131576	0.0383387	0.0409355	0.0665112	0.0270527	0.00445568	0.00100755	0.00131703	0.0181841	0.0238251	0.0316191	0.0352416	0.0497475	0.00894188	FALSE	FALSE	FALSE	FALSE	FALSE	FALSE	FALSE	FALSE	FALSE	FALSE	FALSE	FALSE	FALSE	FALSE	FALSE	FALSE
YOR341W	FALSE	0.0487607	0.0668745	0.0886067	0.0577622	0.0476753	0.067912	0.0308608	0.0164623	0.0329986	0.0825706	0.0383181	0.0513625	0.0712235	0.0369222	0.0487763	0.0562913	FALSE	FALSE	FALSE	FALSE	FALSE	FALSE	FALSE	FALSE	FALSE	FALSE	FALSE	FALSE	FALSE	FALSE	FALSE	FALSE
YPR055W	FALSE	0.0882818	0.0573012	0.00860658	0.0438714	0.0682659	0.106572	0.0623067	0.0702592	0.0458445	0.0311112	0.0212808	0.0523222	0.0470202	0.0457927	0.00624562	0.0128403	FALSE	FALSE	FALSE	FALSE	FALSE	FALSE	FALSE	FALSE	FALSE	FALSE	FALSE	FALSE	FALSE	FALSE	FALSE	FALSE
YDL205C	FALSE	0.0534061	0.0411783	0.0124616	0.0549936	0.00916593	0.00997688	0.0310385	0.0103667	0.0458135	0.00115256	0.0198352	0.00638995	0.0235293	0.0231603	0.0294756	0.0447043	FALSE	FALSE	FALSE	FALSE	FALSE	FALSE	FALSE	FALSE	FALSE	FALSE	FALSE	FALSE	FALSE	FALSE	FALSE	FALSE
YGR208W	FALSE	0.0730198	0.120422	0.146431	0.104687	0.0507808	0.0157667	0.052751	0.0608634	0.0871699	0.0962432	0.0358762	0.0854218	0.0506197	0.0563044	0.0518685	0.0731087	FALSE	FALSE	FALSE	FALSE	FALSE	FALSE	FALSE	FALSE	FALSE	FALSE	FALSE	FALSE	FALSE	FALSE	FALSE	FALSE
YLR171W	FALSE	0.0945968	0.107987	0.0790344	0.0808016	0.0143928	0.00858756	0.0327095	0.0936741	0.0350447	0.168332	0.0870372	0.0822299	0.0144508	0.0120008	0.0143796	0.0372089	FALSE	FALSE	FALSE	FALSE	FALSE	FALSE	FALSE	FALSE	FALSE	FALSE	FALSE	FALSE	FALSE	FALSE	FALSE	FALSE
YDR164C	FALSE	0.018001	0.0246714	0.0270557	0.00507451	0.0433086	0.00820564	0.00916404	0.00145126	0.00238301	0.00561661	0.0715804	0.00481224	0.00865573	0.00877659	0.0305092	0.0522773	FALSE	FALSE	FALSE	FALSE	FALSE	FALSE	FALSE	FALSE	FALSE	FALSE	FALSE	FALSE	FALSE	FALSE	FALSE	FALSE
YAL029C	FALSE	0.0278055	0.00536641	0.0138568	0.051072	0.0149949	0.00303345	0.0163609	0.013563	0.0657281	0.0440835	0.0177892	0.00425843	0.0151775	0.0503366	0.0237906	0.0126379	FALSE	FALSE	FALSE	FALSE	FALSE	FALSE	FALSE	FALSE	FALSE	FALSE	FALSE	FALSE	FALSE	FALSE	FALSE	FALSE
YOR119C	FALSE	0.00480753	0.0261472	0.0648943	0.027894	0.0272421	0.0765896	0.0761543	0.0718111	0.0616482	0.0230211	0.0119523	0.0205743	0.0599875	0.0785026	0.0814025	0.0981897	FALSE	FALSE	FALSE	FALSE	FALSE	FALSE	FALSE	FALSE	FALSE	FALSE	FALSE	FALSE	FALSE	FALSE	FALSE	FALSE
YHL026C	FALSE	0.0241089	0.148022	0.237676	0.222503	0.223316	0.181238	0.00518168	0.295342	0.379358	0.394989	0.243952	0.125134	0.050859	0.0413182	0.0459812	0.12922	FALSE	FALSE	FALSE	FALSE	FALSE	FALSE	FALSE	TRUE	TRUE	TRUE	FALSE	FALSE	FALSE	FALSE	FALSE	FALSE
YML015C	FALSE	0.0239469	0.00939144	0.0182476	0.0195518	0.0139573	0.0371152	0.0232761	0.0272369	0.0509857	0.00923793	0.0141613	0.0183099	0.00205204	0.0213461	0.0127412	0.0251598	FALSE	FALSE	FALSE	FALSE	FALSE	FALSE	FALSE	FALSE	FALSE	FALSE	FALSE	FALSE	FALSE	FALSE	FALSE	FALSE
YGR247W	FALSE	0.0541407	0.0117499	0.00522719	0.013931	0.0215397	0.00560403	0.00197317	0.0276777	0.046029	0.0234137	0.0504404	0.0203133	0.0228385	0.0216771	0.0117927	0.0383968	FALSE	FALSE	FALSE	FALSE	FALSE	FALSE	FALSE	FALSE	FALSE	FALSE	FALSE	FALSE	FALSE	FALSE	FALSE	FALSE
YBL026W	FALSE	0.0582296	0.0336176	0.0594835	0.0250683	0.0721638	0.109828	0.127778	0.127319	0.0351109	0.025233	0.113366	0.036076	0.0664925	0.0577279	0.0763997	0.00523029	FALSE	FALSE	FALSE	FALSE	FALSE	FALSE	FALSE	FALSE	FALSE	FALSE	FALSE	FALSE	FALSE	FALSE	FALSE	FALSE
YMR058W	FALSE	0.139013	0.0956408	0.0984767	0.0423255	0.032193	0.065817	0.0925801	0.148228	0.142299	0.120283	0.05651	0.0102432	0.029932	0.0317313	0.0284789	0.0549328	FALSE	FALSE	FALSE	FALSE	FALSE	FALSE	FALSE	FALSE	FALSE	FALSE	FALSE	FALSE	FALSE	FALSE	FALSE	FALSE
YGL178W	FALSE	0.0487701	0.0393722	0.042376	0.0677882	0.031328	0.00453794	0.0115983	0.112578	0.0224962	0.0817384	0.0388248	0.00849763	0.0307806	0.0247791	0.0162925	0.0291545	FALSE	FALSE	FALSE	FALSE	FALSE	FALSE	FALSE	FALSE	FALSE	FALSE	FALSE	FALSE	FALSE	FALSE	FALSE	FALSE
YEL022W	FALSE	0.0507851	0.0400828	0.0408897	0.0385525	0.0394004	0.0599959	0.00796461	0.0415244	0.0190926	0.0607291	0.0494017	0.037292	0.0462009	0.00508482	0.0288038	0.00870623	FALSE	FALSE	FALSE	FALSE	FALSE	FALSE	FALSE	FALSE	FALSE	FALSE	FALSE	FALSE	FALSE	FALSE	FALSE	FALSE
YGL160W	FALSE	0.0461897	0.010913	0.0110999	0.0244848	0.0278042	0.0194187	0.0208049	0.071233	0.114199	0.0402721	0.0195778	0.0371359	0.0558797	0.0684934	0.0358195	0.04892	FALSE	FALSE	FALSE	FALSE	FALSE	FALSE	FALSE	FALSE	FALSE	FALSE	FALSE	FALSE	FALSE	FALSE	FALSE	FALSE
YPL198W	FALSE	0.0441613	0.0475622	0.0413786	0.00486236	0.0223805	0.0055465	0.0228207	0.0062998	0.0561969	0.00213614	0.0143313	0.0405912	0.0404205	0.00447959	0.00798356	0.0414494	FALSE	FALSE	FALSE	FALSE	FALSE	FALSE	FALSE	FALSE	FALSE	FALSE	FALSE	FALSE	FALSE	FALSE	FALSE	FALSE
YOL140W	FALSE	0.0600303	0.0117712	0.0190569	0.0323211	0.055402	0.0615177	0.0480094	0.0936436	0.0454729	0.0270366	0.0189521	0.0365564	0.0597975	0.02783	0.0354038	0.0227063	FALSE	FALSE	FALSE	FALSE	FALSE	FALSE	FALSE	FALSE	FALSE	FALSE	FALSE	FALSE	FALSE	FALSE	FALSE	FALSE
YHL047C	FALSE	0.0131554	0.0159039	0.0154535	0.0178016	0.0621589	0.0901512	0.0295555	0.0169953	0.0137797	0.0257768	0.0302619	0.0192344	0.022987	0.0492396	0.066325	0.0782747	FALSE	FALSE	FALSE	FALSE	FALSE	FALSE	FALSE	FALSE	FALSE	FALSE	FALSE	FALSE	FALSE	FALSE	FALSE	FALSE
YJL212C	FALSE	0.0632823	0.04383	0.136942	0.179105	0.134059	0.0679434	0.0203852	0.0255658	0.0400327	0.0458253	0.0726301	0.0770587	0.0757262	0.0737365	0.055411	0.0340736	FALSE	FALSE	FALSE	FALSE	FALSE	FALSE	FALSE	FALSE	FALSE	FALSE	FALSE	FALSE	FALSE	FALSE	FALSE	FALSE
YLR052W	FALSE	0.00867333	0.0089473	0.00522801	0.0200884	0.0397131	0.00175064	0.0518883	0.0314037	0.069697	0.0291241	0.0688656	0.0267507	0.0247425	0.0617455	0.00648468	0.0199882	FALSE	FALSE	FALSE	FALSE	FALSE	FALSE	FALSE	FALSE	FALSE	FALSE	FALSE	FALSE	FALSE	FALSE	FALSE	FALSE
YLR465C	FALSE	0.0129217	0.0232138	0.0982431	0.0397495	0.149275	0.308996	0.0645	0.378085	0.150803	0.15934	0.0653827	0.101348	0.027553	0.411278	0.247071	0.162339	FALSE	FALSE	FALSE	FALSE	FALSE	TRUE	FALSE	TRUE	FALSE	FALSE	FALSE	FALSE	FALSE	TRUE	FALSE	FALSE
YPL275W	FALSE	0.176774	0.119899	0.0572855	0.0259339	0.0310946	0.0723388	0.00311508	0.137746	0.0272299	0.0115095	0.219083	0.182494	0.0648065	0.0254295	0.0997429	0.0560708	FALSE	FALSE	FALSE	FALSE	FALSE	FALSE	FALSE	FALSE	FALSE	FALSE	FALSE	FALSE	FALSE	FALSE	FALSE	FALSE
YMR117C	FALSE	0.00830667	0.0334796	0.14552	0.111426	0.141615	0.126571	0.076531	0.0389455	0.120735	0.196673	0.0360574	0.10182	0.0661199	0.0181469	0.0578318	0.0458423	FALSE	FALSE	FALSE	FALSE	FALSE	FALSE	FALSE	FALSE	FALSE	FALSE	FALSE	FALSE	FALSE	FALSE	FALSE	FALSE
YNL250W	FALSE	0.0013416	0.00231321	0.0515437	0.0577302	0.0222963	0.0134982	0.0216225	0.0782137	0.121653	0.0329403	0.040748	0.0025978	0.0207104	0.0291982	0.027364	0.00175408	FALSE	FALSE	FALSE	FALSE	FALSE	FALSE	FALSE	FALSE	FALSE	FALSE	FALSE	FALSE	FALSE	FALSE	FALSE	FALSE
YCL014W	FALSE	0.184819	0.102	0.026516	0.180704	0.252383	0.285862	0.256315	0.268169	0.168838	0.0185764	0.133216	0.140444	0.222285	0.198699	0.147535	0.0715456	FALSE	FALSE	FALSE	FALSE	TRUE	TRUE	TRUE	TRUE	FALSE	FALSE	FALSE	FALSE	FALSE	FALSE	FALSE	FALSE
YBR264C	FALSE	0.0722958	0.0131187	0.00256968	0.0259605	0.0467142	0.0300195	0.0418624	0.00580557	0.00916761	0.00790977	0.0425391	0.0077642	0.00946695	0.07239	0.0413078	0.0198051	FALSE	FALSE	FALSE	FALSE	FALSE	FALSE	FALSE	FALSE	FALSE	FALSE	FALSE	FALSE	FALSE	FALSE	FALSE	FALSE
YOR222W	FALSE	0.0675937	0.040176	0.0215724	0.041786	0.0589672	0.0465956	0.0796743	0.0754372	0.0432917	0.0491917	0.0327519	0.0224545	0.00524287	0.0803601	0.0743927	0.0471447	FALSE	FALSE	FALSE	FALSE	FALSE	FALSE	FALSE	FALSE	FALSE	FALSE	FALSE	FALSE	FALSE	FALSE	FALSE	FALSE
YOL025W	FALSE	0.0132957	0.0508283	0.0227523	0.0244538	0.0229858	0.0217696	0.00382949	0.0229539	0.048997	0.0127709	0.083636	0.0445216	0.015912	0.00717843	0.0808532	0.0215562	FALSE	FALSE	FALSE	FALSE	FALSE	FALSE	FALSE	FALSE	FALSE	FALSE	FALSE	FALSE	FALSE	FALSE	FALSE	FALSE
YLR239C	FALSE	0.00529362	0.0494134	0.0543876	0.0732462	0.111877	0.112315	0.0685197	0.0307547	0.0760864	0.124259	0.095813	0.0622166	0.0491522	0.0756697	0.0255796	0.00241926	FALSE	FALSE	FALSE	FALSE	FALSE	FALSE	FALSE	FALSE	FALSE	FALSE	FALSE	FALSE	FALSE	FALSE	FALSE	FALSE
YGL145W	FALSE	0.0439535	0.031858	0.0194327	0.00960119	0.0333734	0.0888556	0.0840799	0.0573722	0.0839286	0.00887832	0.0292818	0.0381078	0.0773016	0.0187944	0.0383926	0.0474338	FALSE	FALSE	FALSE	FALSE	FALSE	FALSE	FALSE	FALSE	FALSE	FALSE	FALSE	FALSE	FALSE	FALSE	FALSE	FALSE
YPL005W	FALSE	0.00655329	0.0539598	0.0522777	0.0497135	0.00872358	0.0273508	0.0203776	0.0931502	0.0208745	0.074387	0.111787	0.0685104	0.00159642	0.0208791	0.0558089	0.0267997	FALSE	FALSE	FALSE	FALSE	FALSE	FALSE	FALSE	FALSE	FALSE	FALSE	FALSE	FALSE	FALSE	FALSE	FALSE	FALSE
YLR222C	FALSE	0.0313348	0.0268897	0.0774813	0.104317	0.101188	0.0710323	0.0499223	0.0126293	0.0307854	0.0855935	0.0322752	0.0561015	0.0751335	0.0665199	0.0452805	0.0772906	FALSE	FALSE	FALSE	FALSE	FALSE	FALSE	FALSE	FALSE	FALSE	FALSE	FALSE	FALSE	FALSE	FALSE	FALSE	FALSE
YKR028W	FALSE	0.0883709	0.0454762	0.0550277	0.0589783	0.00600404	0.0235641	0.00321749	0.00384929	0.0303541	0.0100506	0.0346203	0.0446832	0.0479943	0.0458009	0.0238282	0.00682079	FALSE	FALSE	FALSE	FALSE	FALSE	FALSE	FALSE	FALSE	FALSE	FALSE	FALSE	FALSE	FALSE	FALSE	FALSE	FALSE
YFR011C	FALSE	0.0304697	0.0089874	0.0285191	0.0538414	0.06504	0.0975553	0.0808002	0.0309981	0.0283218	0.0263603	0.0272942	0.0444826	0.0358951	0.0701302	0.0186667	0.00939263	FALSE	FALSE	FALSE	FALSE	FALSE	FALSE	FALSE	FALSE	FALSE	FALSE	FALSE	FALSE	FALSE	FALSE	FALSE	FALSE
YPR184W	FALSE	0.175879	0.107968	0.101826	0.0381059	0.16256	0.198194	0.155354	0.206261	0.0788074	0.101116	0.0264753	0.0153538	0.0738576	0.123216	0.0814285	0.0943133	FALSE	FALSE	FALSE	FALSE	FALSE	FALSE	FALSE	FALSE	FALSE	FALSE	FALSE	FALSE	FALSE	FALSE	FALSE	FALSE
YKR046C	FALSE	0.226072	0.0965627	0.0177559	0.0360709	0.0204314	0.0256033	0.0188866	0.0155577	0.0251858	0.0135654	0.028461	0.0629655	0.0499857	0.0653396	0.0142481	0.0439102	FALSE	FALSE	FALSE	FALSE	FALSE	FALSE	FALSE	FALSE	FALSE	FALSE	FALSE	FALSE	FALSE	FALSE	FALSE	FALSE
YPL084W	FALSE	0.0767796	0.0617944	0.0742279	0.0251873	0.0385835	0.0684987	0.0592038	0.0645882	0.0556995	0.0288086	0.010389	0.00542024	0.0165577	0.00581181	0.0129678	0.0137468	FALSE	FALSE	FALSE	FALSE	FALSE	FALSE	FALSE	FALSE	FALSE	FALSE	FALSE	FALSE	FALSE	FALSE	FALSE	FALSE
YDR322C-A	FALSE	0.0435876	0.0687804	0.0742257	0.066752	0.0892052	0.0798881	0.0324527	0.0409705	0.0870861	0.104619	0.159805	0.105913	0.0672441	0.0705993	0.0686572	0.00767319	FALSE	FALSE	FALSE	FALSE	FALSE	FALSE	FALSE	FALSE	FALSE	FALSE	FALSE	FALSE	FALSE	FALSE	FALSE	FALSE
YKR048C	FALSE	0.0419317	0.0258769	0.0135429	0.0759471	0.00855367	0.0210772	0.0290784	0.077459	0.0757994	0.0641415	0.00828303	0.0447205	0.00227099	0.034218	0.0456736	0.014326	FALSE	FALSE	FALSE	FALSE	FALSE	FALSE	FALSE	FALSE	FALSE	FALSE	FALSE	FALSE	FALSE	FALSE	FALSE	FALSE
YFL005W	FALSE	0.00662916	0.00835027	0.00908364	0.0073794	0.0240944	0.0489395	0.0345715	0.0152559	0.00124384	0.00106607	0.0236936	0.010187	0.00580557	0.0438215	0.0439621	0.0162639	FALSE	FALSE	FALSE	FALSE	FALSE	FALSE	FALSE	FALSE	FALSE	FALSE	FALSE	FALSE	FALSE	FALSE	FALSE	FALSE
YCR072C	FALSE	0.0737966	0.075301	0.111338	0.119335	0.105735	0.0919847	0.0593295	0.00303728	0.0258082	0.0323748	0.144772	0.0537286	0.0991535	0.117384	0.0972796	0.0572394	FALSE	FALSE	FALSE	FALSE	FALSE	FALSE	FALSE	FALSE	FALSE	FALSE	FALSE	FALSE	FALSE	FALSE	FALSE	FALSE
YMR157C	FALSE	0.0183393	0.0263141	0.0447584	0.0741585	0.0921462	0.0702067	0.0114623	0.0184699	0.00937806	0.00771424	0.0125768	0.0475678	0.0777436	0.0472975	0.0407109	0.0750034	FALSE	FALSE	FALSE	FALSE	FALSE	FALSE	FALSE	FALSE	FALSE	FALSE	FALSE	FALSE	FALSE	FALSE	FALSE	FALSE
YNL243W	FALSE	0.024146	0.0106545	0.0291716	0.00571047	0.00350753	0.0267614	0.0237211	0.0321661	0.0165575	0.0194795	0.00662495	0.0199343	0.0157463	0.027243	0.02937	0.0108432	FALSE	FALSE	FALSE	FALSE	FALSE	FALSE	FALSE	FALSE	FALSE	FALSE	FALSE	FALSE	FALSE	FALSE	FALSE	FALSE
YPL138C	FALSE	0.0157793	0.0369156	0.0133994	0.0556475	0.0149674	0.0520712	0.0453578	0.0209691	0.0468448	0.0192709	0.0200396	0.025553	0.00192965	0.0164171	0.00903896	0.0345284	FALSE	FALSE	FALSE	FALSE	FALSE	FALSE	FALSE	FALSE	FALSE	FALSE	FALSE	FALSE	FALSE	FALSE	FALSE	FALSE
YHR034C	FALSE	0.0590332	0.00633673	0.0262297	0.00455695	0.041506	0.0184635	0.00260503	0.0597384	0.0207856	0.0819515	0.066318	0.030589	0.00815536	0.0137377	0.00941084	0.00970145	FALSE	FALSE	FALSE	FALSE	FALSE	FALSE	FALSE	FALSE	FALSE	FALSE	FALSE	FALSE	FALSE	FALSE	FALSE	FALSE
YOR026W	TRUE	0.156207	0.133149	0.110043	0.0316519	0.00955524	0.0169555	0.0557213	0.084164	0.0978122	0.125348	0.0797072	0.0773091	0.0242545	0.0153257	0.0196704	0.00204131	FALSE	FALSE	FALSE	FALSE	FALSE	FALSE	FALSE	FALSE	FALSE	FALSE	FALSE	FALSE	FALSE	FALSE	FALSE	FALSE
YDR513W	FALSE	0.0809767	0.0297959	0.09346	0.113227	0.143605	0.0783895	0.0613044	0.0104108	0.0327986	0.0773232	0.0725261	0.0393407	0.0585796	0.0507851	0.0417546	0.0401989	FALSE	FALSE	FALSE	FALSE	FALSE	FALSE	FALSE	FALSE	FALSE	FALSE	FALSE	FALSE	FALSE	FALSE	FALSE	FALSE
YOL078W	FALSE	0.00390985	0.0146539	0.0350341	0.0579244	0.0128205	0.0156835	0.00995597	0.0467572	0.00707229	0.0428497	0.043009	0.0456441	0.0116428	0.0413397	0.00945294	0.00862531	FALSE	FALSE	FALSE	FALSE	FALSE	FALSE	FALSE	FALSE	FALSE	FALSE	FALSE	FALSE	FALSE	FALSE	FALSE	FALSE
YNL217W	FALSE	0.111743	0.0670733	0.0185435	0.0614398	0.0143883	0.0358371	0.0385827	0.00979956	0.0296872	0.0341725	0.0114223	0.0962533	0.0966301	0.0723353	0.0660084	0.0371488	FALSE	FALSE	FALSE	FALSE	FALSE	FALSE	FALSE	FALSE	FALSE	FALSE	FALSE	FALSE	FALSE	FALSE	FALSE	FALSE
YIL036W	FALSE	0.0818932	0.084589	0.0823382	0.0714032	0.0415757	0.00184812	0.0359238	0.0256326	0.0910596	0.0985089	0.0828847	0.0496971	0.0363135	0.0410716	0.00245233	0.028528	FALSE	FALSE	FALSE	FALSE	FALSE	FALSE	FALSE	FALSE	FALSE	FALSE	FALSE	FALSE	FALSE	FALSE	FALSE	FALSE
YMR029C	FALSE	0.100167	0.0606814	0.00915504	0.0755882	0.0964075	0.119306	0.114019	0.0808462	0.0515343	0.00928177	0.0360185	0.0459236	0.0524403	0.0530407	0.049776	0.0436262	FALSE	FALSE	FALSE	FALSE	FALSE	FALSE	FALSE	FALSE	FALSE	FALSE	FALSE	FALSE	FALSE	FALSE	FALSE	FALSE
YML118W	FALSE	0.0593509	0.0209956	0.100247	0.066838	0.0928806	0.00623303	0.0448494	0.0823042	0.170188	0.0941862	0.164532	0.0466921	0.00521501	0.128588	0.0466441	0.0166343	FALSE	FALSE	FALSE	FALSE	FALSE	FALSE	FALSE	FALSE	FALSE	FALSE	FALSE	FALSE	FALSE	FALSE	FALSE	FALSE
YBR091C	FALSE	0.0451426	0.0216135	0.0188487	0.00985352	0.0115013	0.0175604	0.0609844	0.0607337	0.0376538	0.0107725	0.0460839	0.00174672	0.0170063	0.0302114	0.012314	0.025109	FALSE	FALSE	FALSE	FALSE	FALSE	FALSE	FALSE	FALSE	FALSE	FALSE	FALSE	FALSE	FALSE	FALSE	FALSE	FALSE
YJL127C	FALSE	0.026827	0.00105963	0.019354	0.0482091	0.0281554	0.104406	0.0278511	0.00872276	0.0373648	0.00103492	0.0880878	0.00501041	0.0543997	0.022342	0.00684109	0.0928375	FALSE	FALSE	FALSE	FALSE	FALSE	FALSE	FALSE	FALSE	FALSE	FALSE	FALSE	FALSE	FALSE	FALSE	FALSE	FALSE
YBR079C	FALSE	0.0110222	0.017536	0.0628407	0.0436253	0.065162	0.0579902	0.0275394	0.0393587	0.0264455	0.0344058	0.0273299	0.015561	0.0568216	0.00837566	0.0258793	0.0593151	FALSE	FALSE	FALSE	FALSE	FALSE	FALSE	FALSE	FALSE	FALSE	FALSE	FALSE	FALSE	FALSE	FALSE	FALSE	FALSE
YAL013W	FALSE	0.109039	0.0651378	0.0357404	0.095799	0.0261243	0.00812158	0.0049986	0.0467442	0.0772099	0.190195	0.0263236	0.116536	0.0649943	0.0540116	0.0282026	0.00313438	FALSE	FALSE	FALSE	FALSE	FALSE	FALSE	FALSE	FALSE	FALSE	FALSE	FALSE	FALSE	FALSE	FALSE	FALSE	FALSE
YLR224W	FALSE	0.0512239	0.0449146	0.0285708	0.00389889	0.00969405	0.033019	0.0512673	0.0705025	0.0512226	0.0283902	0.0291748	0.0299889	0.0301829	0.00719469	0.0157693	0.0212048	FALSE	FALSE	FALSE	FALSE	FALSE	FALSE	FALSE	FALSE	FALSE	FALSE	FALSE	FALSE	FALSE	FALSE	FALSE	FALSE
YHR161C	FALSE	0.0110597	0.0572571	0.0918075	0.128733	0.115065	0.10391	0.0380071	0.0215667	0.0030211	0.033595	0.121053	0.0759893	0.0845827	0.114023	0.072209	0.035017	FALSE	FALSE	FALSE	FALSE	FALSE	FALSE	FALSE	FALSE	FALSE	FALSE	FALSE	FALSE	FALSE	FALSE	FALSE	FALSE
YPR171W	FALSE	0.0928461	0.0259462	0.062566	0.0299401	0.0473556	0.0421249	0.0690076	0.0170784	0.0172273	0.0315847	0.0115559	0.0299004	0.00488391	0.00758017	0.00231593	0.0054766	FALSE	FALSE	FALSE	FALSE	FALSE	FALSE	FALSE	FALSE	FALSE	FALSE	FALSE	FALSE	FALSE	FALSE	FALSE	FALSE
YLL051C	FALSE	0.0405965	0.0026089	0.0336679	0.0720289	0.0617886	0.0327677	0.0547105	0.055475	0.0277999	0.0273737	0.0346303	0.0621193	0.0588913	0.0377084	0.00837812	0.0307277	FALSE	FALSE	FALSE	FALSE	FALSE	FALSE	FALSE	FALSE	FALSE	FALSE	FALSE	FALSE	FALSE	FALSE	FALSE	FALSE
YOR038C	FALSE	0.10897	0.0639481	0.0848791	0.0327569	0.0482084	0.011431	0.0533505	0.108345	0.104725	0.0663994	0.0745698	0.0228994	0.0272772	0.0181663	0.00163564	0.0187079	FALSE	FALSE	FALSE	FALSE	FALSE	FALSE	FALSE	FALSE	FALSE	FALSE	FALSE	FALSE	FALSE	FALSE	FALSE	FALSE
YOL013C	FALSE	0.0942489	0.0672552	0.0722885	0.0272532	0.0116552	0.0169723	0.00650551	0.0580185	0.0540882	0.115891	0.0467168	0.0264515	0.0249377	0.029153	0.00526164	0.0224509	FALSE	FALSE	FALSE	FALSE	FALSE	FALSE	FALSE	FALSE	FALSE	FALSE	FALSE	FALSE	FALSE	FALSE	FALSE	FALSE
YJR082C	FALSE	0.0152642	0.0300915	0.00682489	0.0272533	0.00706561	0.0237424	0.00860445	0.0778692	0.00314146	0.0408756	0.0828225	0.0324041	0.0294253	0.020346	0.036312	0.00777219	FALSE	FALSE	FALSE	FALSE	FALSE	FALSE	FALSE	FALSE	FALSE	FALSE	FALSE	FALSE	FALSE	FALSE	FALSE	FALSE
YER026C	FALSE	0.0156401	0.0139619	0.0356002	0.0198085	0.0214936	0.0295239	0.0218476	0.027622	0.0580473	0.034164	0.0398083	0.00768126	0.0101751	0.00356582	0.0145108	0.027144	FALSE	FALSE	FALSE	FALSE	FALSE	FALSE	FALSE	FALSE	FALSE	FALSE	FALSE	FALSE	FALSE	FALSE	FALSE	FALSE
YJR140C	FALSE	0.0119641	0.0114707	0.0312606	0.0914278	0.107585	0.0574304	0.0459295	0.0161229	0.0266392	0.0635132	0.0830103	0.0474274	0.0428238	0.0510048	0.0274223	0.0230785	FALSE	FALSE	FALSE	FALSE	FALSE	FALSE	FALSE	FALSE	FALSE	FALSE	FALSE	FALSE	FALSE	FALSE	FALSE	FALSE
YOR065W	FALSE	0.0951965	0.0449725	0.0888008	0.112126	0.0672263	0.0182667	0.0788667	0.0899366	0.134818	0.128957	0.0561797	0.00716201	0.0280844	0.0306991	0.0562006	0.0619525	FALSE	FALSE	FALSE	FALSE	FALSE	FALSE	FALSE	FALSE	FALSE	FALSE	FALSE	FALSE	FALSE	FALSE	FALSE	FALSE
[truncated: 4,306 more rows]

## Sheet: b. intra-layer edge table Sc.CC
source	target	Weight	edge type
[truncated: 109,437 more rows]

[truncated: 1 more sheets: c. inter-layer edge table Sc.CC]
