# Supplementary material for: TimeNexus: A Novel Cytoscape App to Analyze Time-Series Data Using Temporal MultiLayer Networks (tMLNs)
Source: Research Square preprint supplement (doi:10.21203/rs.3.rs-133258/v1), 2020-12-31
Supplement: Supplementary file 4 [file c53fb60cdc2d832e8d026b8e.xlsx]

## Sheet: Notes on suppl. Table S9
TimeNexus: a novel Cytoscape app to analyze time-series data using temporal MultiLayer Networks (tMLNs)
Michaël Pierrelée 1, Ana Reynders 2, Fabrice Lopez 3, Aziz Moqrich 2, Laurent Tichit 4 and Bianca H. Habermann 1
Supplementary Table with Information on the KEGG core cell cycle tables for TimeNexus, as well as enrichment of resulting active subnetworks using modEnrichr
a. summary of the mechanosensitivity assay testing pain response after hindpaw inflamation
b. logCPM values of all mouse genes sequenced from dorsal root ganglia at 0d, 1d, 3d and 30d post injection
c. significantly differentially expressed genes between d1 and d0
d. significantly differentially expressed genes between d3 and d0
e. significantly differentially expressed genes between d30 and d0
f. node table uploaded to TimeNexus for creating a tMLN for the mouse interactome integrated with the mouse pain assay data
g. intra-layer edge table uploaded to TimeNexus for creating a tMLN for the mouse interactome integrated with the mouse pain assay data
h. inter-layer edge table uploaded to TimeNexus for creating a tMLN for the mouse interactome integrated with the mouse pain assay data
i. EnrichR enrichments for Wikipathways from active subnetwork extracted from tMLN of mouse pain assay
j. EnrichR enrichments for GO biological process from active subnetwork extracted from tMLN of mouse pain assay
k. EnrichR enrichments for GO molecular from active subnetwork extracted from tMLN of mouse pain assay

## Sheet: a. mech. sensitivity summary
Injection of 20µl Carrageenan 1% in left hind paw
	INJECTED - LEFT HIND PAW (Up and Down begin with hair filament 1g)												NON INJECTED - RIGHT HIND PAW (Up and Down begin with hair filament 1g)
	D0	D0 +1h	D0 +3h	D0 +6h	D+1	D+3	D+7	D+14	D+30	D+45	D+60			D0	D0 +1h	D0 +3h	D0 +6h	D+1	D+3	D+7	D+14	D+30	D+45	D+60
351100	0.349	0.084	0.068	0.056	0.068	0.6	0.2445	0.5615	0.637	0.5045	0.399		351100	0.7335	0.641	0.64	0.79	0.5365	0.774	0.381	0.525	0.624	0.534	0.322
1	0.7755	0.069	0.0725	0.0605	0.068	0.597	0.422	0.6355	0.5705	0.5905	0.716		1	0.7125	0.6275	0.745	0.7055	0.8255	0.7865	0.575	0.8255	0.806	0.765	0.7205
2	0.7125	0.2335	0.0605	0.056	0.068	0.823	0.6615	0.5705	0.5935	0.79	0.9355		2	0.545	0.5365	1.0815	0.7735	0.806	0.765	0.79	0.9755	0.6445	0.755	0.797
3	0.765	0.068	0.068	0.068	0.068	0.6275	0.742	0.792	0.748	0.7455	0.6275		3	0.5415	0.5005	0.5615	0.8345	0.896	0.878	0.755	1.108	0.8345	0.8065	0.6955
4	0.6755	0.2175	0.068	0.079	0.068	1.064	0.8185	0.6945	0.7195	0.5005	0.7735		4	0.8255	0.9095	0.9025	0.748	0.6495	0.9355	0.6	0.7415	0.6885	0.913	0.6545
5	1.0815	0.144	0.1155	0.068	0.0705	0.461	0.497	0.745	1.004	0.962	0.6065		5	0.5855	0.972	0.74	0.8845	0.349	1.013	0.98	1.108	0.874	0.781	0.656
6	0.5965	0.1415	0.068	0.068	0.062	0.935	0.614	0.8255	0.706	0.874	0.8185		6	0.745	0.9935	0.874	0.8845	0.8185	1.0815	0.68	0.735	0.9025	0.7125	0.7865
7	0.921	0.1105	0.068	0.068	0.068	0.7055	0.98	0.851	0.8515	0.874	0.7455		7	0.792	0.7195	0.8255	0.748	0.7835	0.6395	0.9095	0.8005	0.8515	0.748	0.874
8	0.962	0.166	0.0765	0.0605	0.068	0.6755	0.7865	0.689	0.745	1.1065	0.98		8	0.774	1.0825	1.037	1.0815	0.8165	0.8335	0.8185	0.7335	1.013	0.851	0.8075
9	0.876	0.1585	0.0765	0.068	0.068	0.558	0.647	0.8515	0.884	1.019	0.7505		9	0.9485	0.9095	0.9355	1.064	1.064	0.798	0.5965	0.7415	1.1145	1.1145	1.1655
MEAN	0.77145	0.13925	0.07415	0.0652	0.06765	0.70465	0.6413	0.7216	0.7459	0.79665	0.73525		MEAN	0.7203	0.7892	0.83425	0.8514	0.7545	0.85045	0.70855	0.8294	0.8353	0.79805	0.7479
SEM	0.0656207	0.0182607	0.00482934	0.00221886	0.000675154	0.058349	0.0670731	0.0345753	0.0428152	0.0669135	0.052742		SEM	0.0412152	0.0658531	0.0524702	0.0412486	0.0628283	0.0411735	0.0562953	0.0580854	0.049359	0.0470238	0.06665

## Sheet: b. mouse_logCPM
GeneID	Day00_Rep1	Day00_Rep2	Day01_Rep1	Day01_Rep2	Day03_Rep1	Day03_Rep2	Day30_Rep1	Day30_Rep2
Xkr4	2.68735	2.47944	2.44036	2.09591	2.48136	2.76377	2.13634	2.46784
Sox17	3.18086	3.04732	3.35298	2.88728	3.24235	3.23963	3.62015	3.17717
Mrpl15	4.82899	4.8791	4.84986	4.79851	4.77461	4.76708	4.83375	4.86911
Lypla1	5.58225	5.62449	5.50828	5.65803	5.57414	5.58933	5.55443	5.43459
Tcea1	5.57254	5.67047	5.48692	5.46375	5.44604	5.54055	5.33118	5.3817
Rgs20	1.32763	1.38389	1.47196	1.19612	1.35825	1.33548	1.1529	1.13116
Atp6v1h	7.48249	7.4676	7.4193	7.48769	7.47683	7.45626	7.43157	7.4178
Oprk1	1.6907	1.60102	1.39119	1.8166	1.49794	1.50499	1.55141	0.561972
Rb1cc1	7.18988	7.18393	7.15501	7.13808	7.11328	7.18519	7.13022	7.12697
St18	-2.58907	-2.75628	-1.88248	-2.75737	-3.95341	-4.88315	-2.30525	-4.88315
Pcmtd1	6.25751	6.14576	6.15492	6.24809	6.18103	6.28758	6.2917	6.30681
Sntg1	2.72907	2.75502	2.8256	2.65633	2.64943	2.67693	2.80885	2.9102
Rrs1	4.15539	4.18548	4.12299	4.30097	4.24444	4.16955	3.87161	4.06916
Adhfe1	0.929844	1.13891	1.36726	1.55074	1.51352	1.4042	2.08572	1.62095
2610203C22Rik	-0.375161	0.0630261	-0.265027	-0.783087	0.106339	0.0838813	0.412369	0.16254
Mybl1	2.33957	2.55342	2.41724	2.60859	2.30906	2.43928	2.41221	2.78725
Vcpip1	6.63758	6.55037	6.63345	6.55597	6.59849	6.60412	6.5175	6.52788
1700034P13Rik	3.55024	3.35376	3.31282	3.3574	3.45496	3.31692	3.24539	3.14957
Sgk3	3.76202	3.73028	3.76834	3.75347	3.78364	3.67311	3.60025	3.8495
Mcmdc2	-0.734774	-0.935206	-0.302924	-1.41155	-1.11031	-0.852782	-1.72076	-2.18743
Snhg6	2.44849	2.31429	2.20411	2.36855	2.29561	2.40987	2.20119	2.25125
Tcf24	-0.928763	-0.687836	-0.381843	-1.02939	-1.55412	-1.21559	-0.498904	-0.0772205
Cops5	6.87097	6.94334	6.905	6.90515	6.96323	6.95594	6.82969	7.03208
Cspp1	3.64483	3.27577	3.604	3.45362	3.49671	3.38462	3.69336	3.90694
Arfgef1	7.69887	7.64963	7.67965	7.6664	7.64706	7.66358	7.67574	7.70605
Cpa6	-2.58907	-2.34437	-1.66947	-3.28925	-2.54054	-2.67113	-1.89056	-1.71204
Prex2	5.33312	5.05708	5.3263	5.17598	5.51102	5.62975	5.17447	4.96194
A830018L16Rik	6.16402	6.13375	6.16276	6.08224	6.19166	6.23431	6.07236	6.15923
Sulf1	5.39858	5.19958	5.2375	5.33194	5.42817	5.5179	5.44265	5.03854
Slco5a1	6.07177	5.89813	6.05171	5.95333	5.85393	5.86904	5.91694	6.11384
Ncoa2	6.60069	6.63658	6.58953	6.62024	6.63099	6.57915	6.65936	6.54343
Tram1	5.60428	5.48861	5.44894	5.34576	5.4435	5.52435	5.40357	5.47591
Lactb2	4.75214	4.71775	4.68298	4.82661	4.79945	4.84606	4.801	4.80496
Eya1	1.37044	0.437661	0.815521	0.365096	0.545775	0.56943	1.67832	0.961671
Msc	2.0281	2.42354	2.24408	2.04899	2.056	1.90346	2.33725	2.61298
Trpa1	5.83531	5.87827	5.98202	6.03084	6.11395	6.11153	5.76525	5.72644
Kcnb2	5.76133	5.8496	5.70548	5.90803	5.80847	5.91031	5.56986	5.41105
Terf1	3.58928	3.42775	3.37114	3.08631	3.23061	3.42377	3.50714	3.64731
Sbspon	4.2743	4.14351	3.92204	3.99954	4.41693	4.28541	3.43932	3.96219
4930444P10Rik	-0.306107	-0.103867	-0.600384	-0.0122448	0.0217114	-0.563127	-0.721229	-0.794429
Rpl7	7.49585	7.57425	7.49527	7.56338	7.52711	7.50943	7.53961	7.58958
Rdh10	3.05199	2.86564	2.86031	2.7955	2.99013	3.12667	3.1528	3.04112
Stau2	6.43251	6.46162	6.38685	6.40771	6.30595	6.39982	6.41472	6.45976
Ube2w	5.42358	5.62115	5.51714	5.55614	5.57367	5.53503	5.38334	5.50115
Tceb1	6.20118	6.21578	6.16753	6.12246	6.12096	6.29061	6.16535	6.28187
Tmem70	4.81258	4.82951	4.84662	4.76261	4.75917	4.72963	4.69335	4.89566
Ly96	0.592783	0.232755	0.666601	0.174224	0.435604	0.98288	0.0393893	-1.11303
Jph1	2.60458	2.30004	2.48553	2.52533	2.65997	2.3139	2.3081	2.37159
Gdap1	7.25398	7.26706	7.2934	7.29273	7.25845	7.34035	7.23927	7.27996
Pi15	1.31672	0.454922	0.666601	0.802398	0.756845	0.868631	0.941412	1.00338
Gm16070	-1.03651	-0.687836	-1.03808	-1.02939	-0.771386	-0.963879	-0.721229	-0.475168
Crispld1	3.07158	2.88487	2.91498	2.31005	3.13817	3.05249	2.93813	2.86567
Mcm3	1.858	1.82333	2.08445	1.44597	1.93973	1.6314	2.05096	1.95439
6720483E21Rik	-0.340221	-1.12735	-0.553947	-1.09815	-0.560964	-0.592585	-0.936882	-0.691022
Paqr8	6.31207	6.21894	6.43514	6.38388	6.606	6.64275	6.3233	6.30993
Efhc1	2.08705	1.77604	2.26366	2.13388	2.07712	1.87145	2.33243	2.14812
Tram2	0.440363	0.366471	0.208913	0.174224	0.333976	0.542582	0.737902	0.88565
Tmem14a	4.26299	4.27567	4.35363	4.35823	4.34909	4.36419	4.2945	4.30944
Gsta3	-0.447686	-0.650438	-1.39937	-2.20891	-0.809645	-1.12671	0.196086	-1.64607
Kcnq5	5.29959	5.20724	5.3052	5.17325	5.21246	5.20932	5.23895	5.1261
Rims1	5.44376	5.56909	5.41652	5.37141	5.3271	5.36731	5.42353	5.39743
4933415F23Rik	-3.80212	-2.22961	-3.05663	-2.5505	-3.17725	-2.14942	-4.88315	-1.93024
Ogfrl1	7.61636	7.64035	7.57889	7.58222	7.52086	7.62681	7.59835	7.61807
B3gat2	5.61822	5.64108	5.66985	5.78098	5.67802	5.6868	5.52359	5.67454
Smap1	6.82553	6.86157	6.8194	6.8933	6.80981	6.81809	6.78499	6.77346
Sdhaf4	3.74991	3.77735	3.65678	3.85244	3.76098	3.84089	3.40302	3.62744
Fam135a	5.01589	4.94166	5.11441	4.99389	5.02408	5.1002	5.05236	5.19634
Col9a1	-1.57218	-2.92464	-2.43506	-3.28925	-3.39265	-1.98415	-1.89056	-4.88315
Col19a1	2.51678	2.24652	2.59776	2.31005	2.45336	2.59438	2.56375	2.84
Lmbrd1	7.2682	7.20688	7.2617	7.2393	7.17473	7.20672	7.29588	7.28049
Adgrb3	4.60528	4.68338	4.63493	4.54314	4.59131	4.6843	4.5451	4.85138
Phf3	5.76082	5.74604	5.80348	5.66388	5.76967	5.74684	5.76525	5.69973
Ptp4a1	4.23864	4.19835	4.38377	4.32415	4.2018	4.34974	4.15551	3.95157
Gm13363	3.936	3.92402	4.07762	4.0057	3.86332	4.02672	3.8071	3.56961
Khdrbs2	1.49176	1.47977	1.18761	1.86256	1.55175	1.08874	1.38461	1.43534
Gm5415	-2.43368	-3.11528	-1.5737	-1.59813	-2.3037	-2.43938	-2.30525	-4.88315
Prim2	1.93846	1.76224	2.16994	1.8983	1.92233	2.18095	1.95394	1.48771
1700001G17Rik	-1.27962	-2.22961	-2.27585	-2.36962	-1.42973	-1.21559	-1.89056	-1.20503
Rab23	4.42026	4.30095	4.52295	4.20256	4.48864	4.51595	4.26067	4.13044
Bag2	4.53174	4.80363	4.71888	4.92626	4.66466	4.64934	4.4856	4.68754
Zfp451	4.60752	4.68246	4.76655	4.76986	4.66291	4.8281	4.75224	4.71526
Bend6	6.91728	6.99422	6.90993	6.88998	6.83947	6.84838	6.94581	7.01115
Dst	10.8629	10.6446	10.8575	10.6783	10.8243	10.8127	10.8535	10.9142
Ccdc115	4.47769	4.63119	4.55111	4.60257	4.52176	4.51509	4.50392	4.39614
Imp4	3.71503	3.74789	3.77291	3.30511	3.53728	3.72627	3.77195	3.42172
Ptpn18	0.0505108	0.329514	0.626839	0.857903	0.795591	0.756283	0.876714	0.268965
Amer3	5.05086	5.13679	5.08812	5.20837	5.01863	5.02582	5.0509	4.93188
Arhgef4	6.60069	6.57303	6.49779	6.56815	6.50538	6.50786	6.5228	6.55465
Fam168b	7.93446	8.01782	7.97167	7.98048	7.97592	7.95025	8.01028	7.96115
Plekhb2	8.10231	8.19392	8.14267	8.2151	8.13993	8.1399	8.10661	8.1113
Hs6st1	7.23998	7.23338	7.19613	7.2242	7.28791	7.23307	7.20179	7.08615
Uggt1	6.81878	6.70806	6.85183	6.81804	6.8025	6.78769	6.83246	6.85794
Neurl3	1.17899	0.932589	1.02886	0.556189	0.820855	1.11631	1.45721	0.793561
Arid5a	3.74991	3.72851	3.77518	3.8862	3.7061	3.67774	3.46155	3.61235
Kansl3	6.50965	6.61298	6.72986	6.58846	6.61709	6.6382	6.66225	6.68512
Fer1l5	3.91988	4.13416	3.93023	3.7114	3.99955	4.01456	3.84817	3.96351
Lman2l	5.39145	5.35132	5.32241	5.35704	5.35547	5.22418	5.32027	5.13609
Cnnm4	4.5586	4.53606	4.47757	4.57799	4.51209	4.52969	4.45711	4.59168
Cnnm3	4.98436	4.93091	4.92351	4.95093	5.01522	5.04866	5.15414	4.92579
Ankrd23	2.48304	1.49654	1.61092	1.34599	1.81954	1.41904	2.25309	1.57328
Ankrd39	3.54557	3.64449	3.55981	3.66288	3.78845	3.63072	3.61222	3.62075
Sema4c	5.75022	5.21169	5.6029	5.16318	5.48409	5.50536	5.69193	5.73188
Fam178b	5.53186	5.16983	4.98279	4.94347	5.11752	5.12756	4.69147	5.12728
Cox5b	7.20418	7.23041	7.11425	7.22045	7.06371	7.07182	7.06475	7.11126
Actr1b	8.0784	8.21663	8.14123	8.22282	8.1115	8.0895	8.18869	8.09497
4933424G06Rik	-2.2934	-1.17966	-1.77204	-1.41155	-2.54054	-1.21559	-1.56885	-1.20503
Zap70	-1.09355	-1.17966	-0.192094	-0.840835	-0.848948	-0.925888	-0.0839682	0.00720526
Tmem131	6.65365	6.58091	6.68609	6.56086	6.75598	6.71723	6.73454	6.67103
Cnga3	-1.57218	-2.46904	-2.61405	-2.20891	-1.76347	-1.52069	-2.08306	-1.64607
Inpp4a	6.86537	6.90146	6.91407	6.93745	6.92114	6.90991	6.86743	7.00266
Coa5	6.87817	6.9691	6.8817	6.81746	6.83017	6.8249	6.83118	6.85617
Unc50	4.95916	5.15274	4.87554	5.0052	4.95872	4.94996	4.91171	5.33704
Mgat4a	5.99475	6.10294	6.11056	6.12151	6.27143	6.19283	6.10344	6.11057
2010300C02Rik	1.98742	2.27596	2.03214	2.19263	2.21214	1.72989	2.42131	2.45286
Tsga10	3.25414	3.26357	3.08602	3.16177	3.27471	3.30699	3.14732	2.56852
Lipt1	1.63032	1.93211	1.47196	1.06075	1.50575	1.72989	1.84316	1.34901
Mitd1	2.61797	2.7054	2.90255	2.74242	2.86515	2.78968	2.55551	2.55456
Mrpl30	4.74708	4.78584	4.67081	4.91758	4.73943	4.71092	4.62014	4.74168
Txndc9	5.20444	5.20533	5.19819	5.21813	5.25768	5.29224	5.03097	5.15298
Eif5b	6.22944	6.0648	6.18603	6.02681	6.17124	6.02598	6.0774	6.1787
Rev1	4.11347	3.82791	3.95453	3.87951	4.1379	4.07904	4.03172	3.87219
Aff3	6.59731	6.47385	6.56508	6.58127	6.58427	6.60472	6.57649	6.52744
Lonrf2	6.85103	6.88305	6.90915	6.85829	6.88323	6.89953	6.91975	6.85385
Chst10	3.41106	3.63505	3.58596	3.36061	3.33075	3.47614	3.30807	3.50937
Nms	-2.58907	-2.75628	-1.77204	-4.88315	-2.82405	-2.23975	-3.88738	-4.88315
Pdcl3	4.9679	5.07812	4.84878	5.0742	4.96653	4.8953	4.85825	4.88663
Npas2	2.53101	2.6238	1.98573	2.20695	2.46543	2.36076	2.21696	2.30644
Rpl31	5.84767	5.97978	5.80571	5.87926	5.8524	5.77125	5.67158	5.7978
Tbc1d8	4.92546	5.11591	5.08262	5.0456	4.90731	4.9859	5.1657	5.03289
Cnot11	4.99124	4.99205	5.07894	5.04859	5.03559	5.03127	4.96947	4.97445
Rnf149	4.84615	4.85004	4.87872	4.96469	4.98131	5.05283	4.92377	5.07322
Creg2	5.14171	5.09336	5.0632	5.00929	5.19021	5.22048	5.03319	5.18619
Rfx8	-1.57218	-1.61116	-1.66947	-1.50182	-1.49059	-1.17047	-1.43142	-3.06403
Map4k4	7.44041	7.34696	7.19677	7.18924	7.34889	7.33999	7.24745	7.35727
Gm16894	-1.34739	-0.847951	-1.03808	-1.50182	-0.930917	-0.534259	-0.27657	-0.338635
Il1r2	-0.928763	-1.93168	-0.697997	-1.32659	-1.2612	-1.0029	-1.24709	-0.985172
Il1r1	3.43898	3.20101	3.46433	3.06289	3.59882	3.42561	3.56372	3.48381
Il1rl2	-0.116807	-0.0788099	-1.17194	-0.727563	-0.973718	-0.684748	-0.891095	-1.06914
Il1rl1	1.11748	0.61705	-0.2281	-0.265452	0.530542	0.29163	1.13087	1.06376
Il18r1	-2.04814	-2.22961	-2.13247	-2.5505	-0.734114	-1.17047	-1.24709	-1.11303
Il18rap	-2.04814	-1.12735	-0.697997	-0.572763	-0.240408	-0.622657	0.217144	-1.3033
Slc9a2	1.81989	1.42827	1.70939	1.67956	2.056	1.97549	3.1528	1.55236
Mfsd9	3.74382	3.95316	3.63439	3.96415	3.82637	3.79754	3.75585	3.46154
Tmem182	-2.04814	-1.76253	-2.61405	-3.28925	-2.00845	-1.98415	-2.08306	-2.28447
Pou3f3	-2.43368	-1.68486	-3.05663	-2.20891	-2.19842	-1.76709	-1.30596	-2.50064
Mrps9	4.89003	4.75829	4.72243	4.71956	4.83243	4.72218	4.73501	4.87052
Gpr45	2.19222	2.5251	2.36985	2.63001	2.56597	2.63942	2.65145	2.53692
Tgfbrap1	6.05792	6.01475	6.06293	6.09481	6.10883	6.03142	6.02127	6.06174
AI597479	4.67845	4.64253	4.58263	4.66743	4.56258	4.67969	4.60124	4.59509
Fhl2	2.09983	1.47977	2.1063	1.98395	2.34433	2.1546	2.80885	2.52623
Nck2	3.42635	3.29746	3.23231	3.23697	3.06075	3.04295	3.3324	3.15883
1500015O10Rik	2.86628	2.60459	2.81237	3.05499	2.87423	2.99671	3.54927	3.0361
Uxs1	4.8309	4.81119	4.82482	5.00827	4.89992	4.89993	4.7905	4.78118
Tpp2	6.53839	6.54836	6.61928	6.49455	6.60214	6.59128	6.5836	6.57576
Tex30	1.93133	2.22152	2.03214	1.65887	2.05067	2.06782	1.88981	2.08639
Kdelc1	2.93207	2.92569	2.62829	2.31667	2.83757	2.62349	2.74504	2.9184
Bivm	4.3538	4.32344	4.37629	4.25002	4.348	4.36897	4.29698	4.26512
Ercc5	4.61977	4.51461	4.48036	4.65574	4.68887	4.61431	4.69991	4.74014
Gulp1	4.87059	4.4813	4.3986	4.29092	4.52752	4.50643	4.08137	4.80938
Col3a1	8.23982	7.47806	7.47617	7.46087	7.51446	7.57652	7.29186	7.32126
Col5a2	5.81123	5.22558	5.38632	5.13631	5.38223	5.52134	5.28455	5.37626
Wdr75	4.8309	4.8783	5.01972	4.7541	4.78748	4.92158	4.75044	4.83126
Slc40a1	1.90244	1.33811	1.59039	2.04102	1.97954	1.79389	2.34683	1.34901
Dnah7b	2.42329	2.27596	2.49107	1.55074	2.54338	2.26957	2.29826	1.88357
Slc39a10	6.00328	5.95989	5.93751	5.95704	5.99413	6.05031	5.93929	5.9945
Tmeff2	6.7224	6.78621	6.59791	6.73463	6.68895	6.62486	6.6851	6.57942
9330175M20Rik	-0.604686	-0.54373	-0.97554	-1.24636	-1.62059	-0.783203	-1.6428	-1.25333
Sdpr	3.74382	3.55926	3.62181	3.67838	3.85417	3.76307	4.18253	4.12809
Nabp1	2.44849	2.5251	2.33942	2.2765	2.4124	2.34142	2.3276	2.06192
Myo1b	5.60147	5.52737	5.65015	5.47341	5.74307	5.63691	5.63488	5.76522
Stat4	-0.928763	-1.93168	-0.915596	-1.24636	-0.528695	-0.450967	-0.846717	-3.24753
Stat1	6.11411	6.03677	7.11964	6.88998	6.29303	6.2309	6.2097	5.95851
Gls	8.11889	8.20966	8.16713	8.21199	8.1838	8.21668	8.16569	8.14823
Nab1	5.82572	5.87226	5.76565	5.74033	5.84356	5.82272	5.62752	5.8184
Tmem194b	2.30136	1.72715	2.15603	1.75946	2.00731	2.33752	2.02731	1.86672
Mfsd6	7.97664	7.96524	7.95935	7.9591	7.99156	7.96573	7.95817	8.01829
Inpp1	4.76724	4.80026	4.7236	4.86436	4.8223	4.8288	4.75764	4.85565
Hibch	4.5199	4.60146	4.55509	4.50163	4.60683	4.56347	4.54301	4.40492
1700019D03Rik	2.24495	2.30956	2.39374	2.05691	2.08235	2.22383	2.48346	1.6475
Mstn	-0.116807	-0.236126	-1.10346	-1.24636	-0.593971	-0.505958	-1.24709	-0.658137
1700019A02Rik	-2.04814	-2.02432	-2.61405	-2.20891	-2.00845	-3.49646	-3.08184	-2.75501
Pms1	2.17421	2.09511	2.04728	2.20695	1.93395	1.93477	2.05681	2.06685
Ormdl1	3.57104	3.58693	3.25531	3.28163	3.22116	3.26859	3.1718	3.14259
Osgepl1	3.56183	3.39459	3.34074	3.20165	3.40153	3.52153	3.36814	3.30566
Asnsd1	5.34927	5.36223	5.29175	5.39427	5.33534	5.26939	5.33238	5.38713
Dnah7a	-0.0307239	-0.41272	-0.302924	-0.432976	-0.734114	-0.749633	-0.0584384	-1.02655
Stk17b	2.25641	2.30956	2.39965	2.29672	2.51658	2.60739	2.58415	2.34345
Hecw2	4.30911	4.18419	4.31506	4.15535	4.4436	4.40015	4.4258	4.29691
Ccdc150	-1.34739	-2.75628	-1.03808	-2.06432	-2.41726	-1.043	-1.30596	-3.06403
Gtf3c3	5.49726	5.52686	5.55073	5.47858	5.49247	5.53333	5.51192	5.58552
Pgap1	4.90285	4.86626	4.92761	4.83815	5.02408	4.94932	4.95544	4.86275
Ankrd44	4.21681	4.06979	4.04405	4.03609	4.16775	4.07904	4.31784	4.10433
Sf3b1	7.31964	7.20433	7.33119	7.1504	7.28494	7.36618	7.45696	7.31455
Coq10b	4.25301	4.40675	4.13898	4.421	4.28812	4.32829	4.38916	4.17332
Hspd1	7.68144	7.75377	7.73402	7.7421	7.67428	7.73434	7.58639	7.66532
Hspe1	5.28847	5.34901	5.22007	5.36344	5.18414	5.30328	5.1126	5.15356
Mob4	6.28225	6.33537	6.24139	6.37717	6.28992	6.31287	6.18786	6.30446
Rftn2	3.82109	3.81627	3.60655	3.51246	3.48094	3.34244	3.5902	3.67982
Mars2	2.9984	3.29746	3.10424	3.19807	3.31971	3.21646	2.8832	3.2374
Plcl1	4.24008	4.35826	4.26898	4.50163	4.209	4.33613	4.26952	4.28217
Satb2	-0.272782	-0.890919	-0.749398	0.231384	-0.377362	-0.0324075	-0.569274	0.198895
9130024F11Rik	-2.96139	-2.34437	-2.81843	-2.5505	-2.19842	-2.23975	-2.568	-1.93024
1700066M21Rik	5.28917	5.36964	5.16648	5.22957	5.29139	5.2347	5.21429	5.2131
Tyw5	3.11629	3.0755	3.06013	3.07855	2.98734	3.02123	2.9726	2.81679
9430016H08Rik	3.64918	3.49605	3.55452	3.54664	3.4849	3.47791	3.66106	3.52735
Spats2l	4.91556	4.72932	4.91322	4.86887	4.75426	4.69729	4.77372	4.67308
Kctd18	3.66217	3.52085	3.47277	3.58826	3.58599	3.48674	3.45047	3.40431
Sgol2a	2.60009	2.54941	2.55073	2.47297	2.22639	2.60739	2.68207	2.66589
Aox1	5.95442	5.94813	5.98054	6.02984	6.10594	6.04105	6.01376	6.13099
Aox3	-0.981629	-1.93168	-1.39937	-1.17035	-0.771386	-0.925888	-0.109958	0.106231
Aox4	2.7776	3.21374	2.98349	3.05894	3.00673	2.74622	2.91577	3.0511
Bzw1	7.27878	7.30251	7.22472	7.26219	7.30675	7.34655	7.21902	7.22028
Clk1	5.32158	5.25852	5.41506	4.66873	5.43943	5.43137	5.7041	5.71825
Ppil3	3.86292	3.88952	3.76147	4.02603	3.87542	3.90816	3.83801	3.65059
Nif3l1	4.65591	4.94854	4.64616	4.8347	4.61226	4.70109	4.71108	4.59253
Orc2	4.85372	4.99427	4.89345	5.04958	4.94443	4.89065	4.91654	4.80422
Fam126b	6.42618	6.40557	6.39944	6.43192	6.48454	6.49018	6.42296	6.3682
Ndufb3	5.54594	5.63636	5.51033	5.67358	5.66282	5.63094	5.53255	5.63942
Gm20257	-0.0588514	-0.613985	-0.422983	-1.02939	-1.62059	-0.852782	-0.27657	-0.75913
Als2cr12	0.985991	1.2118	0.208913	0.643011	0.590531	0.608787	0.822781	0.0869624
Cflar	5.67963	5.56413	5.54608	5.56172	5.6737	5.75526	5.5932	5.65095
Casp8	1.21468	1.31938	1.79261	1.22456	1.6607	1.06063	1.4748	1.82662
Trak2	6.92425	7.00872	7.00968	6.88024	7.05075	7.07152	7.02239	6.87244
Stradb	3.77203	3.80958	3.74764	3.78484	3.79961	3.79043	3.93176	3.84377
Tmem237	4.71213	4.69614	4.73183	4.74799	4.70762	4.62154	4.63684	4.68033
Mpp4	2.30688	2.3654	2.36985	2.15619	2.40824	2.1004	2.10844	2.22064
Als2	5.67109	5.69156	5.6625	5.64296	5.72311	5.722	5.63341	5.68018
Cdk15	4.6827	5.00383	4.71533	4.89122	4.62666	4.66576	4.80622	5.00685
Fzd7	4.84994	4.33281	4.46353	4.6214	4.52944	4.6038	5.04355	4.51265
Gm973	-0.447686	-0.381745	-0.648365	-0.524647	-0.29364	-0.0324075	0.393993	-0.563754
Sumo1	5.09301	5.24928	5.15691	5.22077	5.13084	5.06879	5.06331	5.031
Nop58	4.23574	4.37536	4.29459	4.38209	4.33271	4.50643	4.30314	4.32597
Bmpr2	8.50955	8.40535	8.49004	8.43016	8.53284	8.56137	8.38108	8.42019
Fam117b	6.25751	6.30535	6.26222	6.36883	6.37607	6.33773	6.30928	6.3177
Ica1l	3.91447	4.03435	3.85264	4.14609	4.0215	3.86004	3.89956	3.91653
Wdr12	5.0525	5.16983	5.07248	4.98561	5.07222	4.98341	4.89465	5.04978
Carf	3.66647	3.63316	3.70292	3.25431	3.39103	3.61147	3.71017	3.61572
Nbeal1	5.44689	5.49801	5.34556	5.5279	5.28233	5.5084	5.05967	5.00428
Cyp20a1	3.78198	3.72673	3.78425	3.7114	3.87089	3.79896	3.94917	3.50393
Abi2	6.39185	6.34118	6.39057	6.35322	6.40611	6.42047	6.33629	6.40854
Raph1	7.13234	7.1101	7.19868	7.13246	7.16228	7.2592	7.16992	7.0703
Cd28	-1.57218	-3.33501	-2.27585	-1.70132	-2.3037	-1.52069	-1.13611	-4.37579
Pard3b	3.25985	2.97138	3.17831	2.77643	3.0581	3.10619	3.16097	2.90746
Nrp2	6.19562	6.13107	6.1065	6.04187	6.11873	6.14091	6.18619	6.33132
4930487H11Rik	-1.34739	-3.11528	-2.43506	-2.36962	-2.82405	-2.06442	-2.8895	-0.944953
Ino80d	5.56737	5.27562	5.58421	5.26079	5.45211	5.47949	5.57446	5.74692
Ino80dos	4.87524	4.779	4.69023	4.72454	4.70508	4.78294	4.80187	5.00557
Ndufs1	7.16292	7.1152	7.1023	7.13854	7.12632	7.08423	7.1399	7.16551
Eef1b2	6.93075	7.02362	6.96329	6.99764	6.94306	6.9369	6.89485	6.8833
Gpr1	-0.734774	-1.23395	-1.10346	-0.840835	-1.42973	-0.534259	-0.846717	-0.691022
Zdbf2	1.9736	1.41068	1.49423	1.76914	1.93395	1.73583	1.4394	2.15276
Adam23	9.20745	9.08415	9.10988	9.05464	9.17053	9.15941	9.10277	9.14632
Dytn	-1.4185	-0.381745	-0.600384	-1.17035	-0.734114	-0.783203	-0.19086	0.125246
Mdh1b	-0.340221	-0.351422	-0.802698	0.231384	-0.0681911	-0.249839	-0.367695	-1.25333
Fastkd2	4.33636	4.37423	4.41474	4.37259	4.38341	4.34295	4.36577	4.29166
4933402D24Rik	0.537495	-0.264098	0.686079	0.339327	0.126742	0.528969	0.500893	0.69519
Gm13749	0.0505108	-0.613985	0.00689098	-0.840835	-0.000244495	-0.346901	-0.0333526	0.368076
Klf7	6.05505	6.04107	6.10559	6.06858	6.09757	6.09459	6.0265	6.0725
Mir6899	-1.49329	-1.12735	-2.27585	-1.02939	-2.10031	-1.98415	-1.4985	-3.45781
Creb1	5.3168	5.25113	5.2408	5.1241	5.2571	5.26991	5.35927	5.13375
Mettl21a	3.84785	3.93482	3.92204	3.8202	3.87994	3.92774	3.78259	3.81332
2810408I11Rik	-2.16556	-2.92464	-2.00207	-2.20891	-2.41726	-2.14942	-3.88738	-1.71204
Ccnyl1	3.19879	3.10039	3.20893	3.39854	3.21878	3.16238	3.26575	3.14725
Fzd5	1.95964	1.69118	2.30834	1.72006	1.73568	2.12775	1.94134	2.3475
Plekhm3	7.44793	7.38994	7.48384	7.45769	7.42242	7.46857	7.4662	7.46136
D630023F18Rik	0.314454	0.0172795	0.312804	-0.346784	0.280344	-0.0733511	-1.19053	0.0275617
Idh1	7.01581	7.11095	7.05134	7.10644	7.0338	7.08627	6.92836	6.99831
Pikfyve	5.25601	5.1247	5.28857	5.34656	5.30433	5.40878	5.39031	5.51654
Pth2r	-3.19113	-1.34907	-2.27585	-0.900991	-1.11031	-2.06442	-1.72076	-1.46453
Map2	7.07383	6.79344	7.00508	6.71221	6.99375	7.00609	7.15873	7.16709
Unc80	8.06736	7.86801	8.05912	7.89738	7.91407	7.93194	7.9035	8.02004
Rpe	4.86592	4.98761	4.86703	5.01133	4.96298	4.99707	4.92457	4.79015
Kansl1l	4.36311	4.12206	4.15654	3.99954	4.21853	4.17284	4.31051	3.97141
Acadl	7.11336	7.0581	7.01667	7.03273	7.03363	7.08088	7.09066	7.08797
Myl1	3.19284	2.47098	1.08863	1.73001	2.29561	2.34142	2.74141	0.918722
Lancl1	7.16862	7.20879	7.14471	7.25941	7.17382	7.13692	7.18084	7.21793
Cps1	-2.2934	-2.02432	-3.69829	-2.99893	-3.17725	-1.70143	-1.4985	-1.20503
Erbb4	-0.485364	-0.129366	-1.03808	-0.346784	-0.436004	-0.622657	-1.30596	-1.46453
Ikzf2	2.69579	2.30004	2.4966	1.78831	2.55472	2.38741	2.50503	2.03201
Vwc2l	3.91266	3.80454	3.64935	3.60998	3.6839	3.78041	3.6649	3.71947
Bard1	1.22638	1.38389	1.07392	0.704863	0.605147	0.857782	1.14193	1.07359
Abca12	-0.485364	-0.687836	-0.46533	0.533641	-0.16407	-0.158898	-0.109958	0.490447
Atic	5.78921	5.88903	5.78158	5.9512	5.79578	5.81888	5.75584	5.70725
Fn1	6.42555	5.52124	5.88317	6.04536	6.37873	6.32129	6.96558	6.04155
Mreg	2.67885	2.76543	2.46876	2.8283	2.90704	2.77534	2.29826	2.964
Pecr	2.42329	2.09511	2.1837	2.34284	2.12355	2.16343	2.3081	2.43011
Tmem169	3.99534	4.03578	4.07208	3.82717	4.01468	4.11934	3.79139	3.81771
Xrcc5	4.90558	4.96294	4.89345	4.87	4.80895	4.93713	4.84732	4.91627
March4	4.36443	4.6631	4.661	4.56276	4.66029	4.54668	4.53779	4.73241
Smarcal1	6.16059	6.26585	6.2043	6.20147	6.23401	6.26466	6.17816	6.27869
Rpl37a	6.25645	6.38939	6.29668	6.32642	6.23401	6.23588	6.1119	6.31459
Igfbp2	3.57104	3.43864	3.64189	3.35097	3.54299	3.57881	4.29326	3.41594
Igfbp5	8.16674	7.42526	7.57661	7.75906	8.07489	8.05266	8.13775	7.46276
6030407O03Rik	0.127414	-0.57843	-0.2281	-1.93291	-0.0225397	-0.203652	-0.27657	-0.190213
Tns1	9.16831	9.08817	9.15005	9.13665	9.19111	9.17404	9.13018	9.17505
Rufy4	-2.43368	-1.47417	-1.39937	-1.81247	-1.37134	-2.43938	-1.19053	-1.78117
Cxcr2	-1.4185	-0.264098	-0.553947	0.259136	0.166703	0.696647	1.32766	-0.0134425
Arpc2	7.48432	7.53776	7.52228	7.58599	7.54688	7.50726	7.49478	7.51877
Aamp	6.54512	6.6197	6.61896	6.79127	6.63522	6.63085	6.57037	6.71209
Pnkd	7.46269	7.4162	7.44543	7.46702	7.37497	7.41256	7.4296	7.49487
Tmbim1	5.81074	5.68837	5.63645	5.77858	5.80373	5.74205	5.68911	5.8466
Catip	-0.780881	-1.29036	-0.648365	-1.50182	-1.11031	-0.888872	-1.30596	-1.78117
Slc11a1	1.13	1.49654	1.01353	1.48175	0.940939	1.49802	1.60831	1.79728
Ctdsp1	5.71328	5.46591	5.51033	5.58247	5.58062	5.58399	5.46042	5.53443
Vil1	-2.58907	-2.02432	-1.4839	-2.5505	-1.37134	-1.63863	-1.43142	-0.944953
Usp37	4.76122	4.71058	4.69385	4.65965	4.78988	4.70336	4.79663	4.66498
Rqcd1	4.66239	4.66681	4.71533	4.71831	4.75098	4.7079	4.72125	4.57708
Plcd4	5.52595	5.5089	5.4468	5.37617	5.46168	5.39384	5.46538	5.54638
Zfp142	5.3856	5.37588	5.43462	5.25908	5.36032	5.32756	5.39205	5.30873
Bcs1l	3.69412	3.68345	3.73132	3.89065	3.71287	3.64341	3.8123	3.91516
Rnf25	4.4405	4.48235	4.45362	4.61872	4.4221	4.5047	4.51246	4.51805
Stk36	1.98052	1.41068	1.64117	1.39685	2.03456	2.00036	1.92863	1.59391
Ttll4	2.49276	2.46673	2.5347	1.98395	2.78719	2.50681	2.50074	2.60284
Cyp27a1	2.64438	2.2564	2.6029	2.66154	2.67043	2.43563	3.09993	2.84
Prkag3	-1.03651	-2.92464	-1.77204	-2.06432	-1.42973	-1.57845	-0.761858	-1.3033
Wnt6	4.48014	4.59271	4.58133	4.8208	4.63202	4.695	4.56063	4.79535
Wnt10a	0.499423	-0.54373	0.15402	0.365096	0.0856426	-0.0123634	-0.0333526	0.851801
Cdk5r2	8.24486	8.36483	8.27014	8.39012	8.37696	8.3093	8.26501	8.11747
Cryba2	1.38095	1.11739	1.39119	1.31988	1.10418	1.18736	0.723257	1.29125
Ccdc108	-3.80212	-1.93168	-3.05663	-1.59813	-2.82405	-2.43938	-2.71981	-2.75501
Ihh	-3.19113	-2.46904	-2.13247	-2.06432	-2.19842	-1.98415	-1.72076	-4.88315
Nhej1	1.3492	1.33811	1.17388	1.33299	1.2321	0.824736	1.21702	1.14985
Cnppd1	5.23517	5.36736	5.45747	5.43818	5.46819	5.34612	5.39031	5.37576
Fam134a	6.94918	6.98738	6.97298	7.09541	6.96287	6.90547	6.95112	6.84115
Zfand2b	4.45921	4.52996	4.53509	4.47525	4.58763	4.45067	4.41673	4.63792
Abcb6	4.58611	4.72932	4.67325	4.6726	4.8301	4.75836	4.54614	4.61372
Atg9a	7.43491	7.52453	7.46035	7.52835	7.45884	7.42582	7.46028	7.45913
Ankzf1	3.93956	3.86066	3.97447	3.68607	3.97162	4.04954	4.2594	4.05436
Glb1l	3.56183	3.25621	3.48949	3.11317	3.51036	3.48145	3.84817	3.63077
Stk16	6.30588	6.51737	6.43801	6.4736	6.41028	6.39114	6.30252	6.37045
Tuba4a	8.5234	8.51806	8.4525	8.52179	8.47694	8.44625	8.41515	8.46034
Dnajb2	6.80031	6.80505	6.72869	6.79245	6.76475	6.77819	6.79816	6.86839
Ptprn	8.44051	8.50705	8.489	8.55829	8.55958	8.50935	8.46888	8.4746
Resp18	5.58679	5.78538	5.6551	5.77978	5.62073	5.70242	5.71617	5.87707
Dnpep	5.70075	5.77982	5.6588	5.85275	5.71091	5.80518	5.70922	5.69656
Des	2.83986	2.05039	1.78359	2.12637	2.20256	1.99542	2.49644	2.16659
Speg	5.38102	5.28108	5.42813	5.25046	5.32544	5.26735	5.51724	5.50115
Gmppa	4.6505	4.61015	4.57089	4.67389	4.62845	4.52627	4.78169	4.45275
Asic4	-0.272782	-0.103867	-0.915596	-1.02939	-0.18907	-0.622657	0.0628438	-0.594534
Chpf	7.32594	7.33302	7.27362	7.38299	7.3632	7.33474	7.24761	7.24549
Tmem198	3.68355	3.76356	3.5963	3.4476	3.58783	3.52153	3.81748	3.75347
Obsl1	4.47033	4.44072	4.42202	4.24829	4.52272	4.49335	4.67349	4.55007
Inha	2.76962	2.74453	2.8858	2.69241	2.942	2.59764	2.85996	2.82554
Stk11ip	5.19851	5.19316	5.29096	5.18143	5.16454	5.22048	5.2524	5.33244
Slc4a3	5.04839	4.84186	5.1464	5.02453	5.04098	5.10881	5.40587	5.20697
Epha4	2.82069	2.67257	2.57182	2.71763	2.61735	2.48934	2.8766	2.50461
Sgpp2	7.67571	7.68766	7.68767	7.69985	7.59343	7.61034	7.64486	7.69734
Farsb	6.44352	6.55613	6.49296	6.57127	6.49217	6.48226	6.53228	6.38334
Mogat1	-1.34739	-0.155325	-0.97554	-1.93291	-1.01783	-0.817573	-0.681714	-0.867729
Acsl3	6.18479	6.19987	6.20851	6.2232	6.14928	6.2177	6.18953	6.21188
Utp14b	3.6899	3.53512	3.83093	3.59372	3.85875	3.69917	3.66298	3.72882
Kcne4	1.60365	0.944859	1.21468	1.52811	1.63244	1.4264	1.79496	0.88565
Scg2	8.30438	8.39874	8.37839	8.42308	8.57886	8.55152	8.27571	8.26475
Ap1s3	-0.410968	0.171422	0.00689098	-0.115372	0.402517	0.156506	0.0859231	-0.724674
Wdfy1	4.15233	3.99801	4.20629	3.95145	4.07236	4.03757	4.08567	4.26083
Mrpl44	4.41771	4.50635	4.41474	4.53465	4.2994	4.27015	4.29698	4.36249
Serpine2	6.71151	6.57006	6.45656	6.50436	6.47462	6.44876	6.339	6.44872
Fam124b	-2.96139	-2.34437	-3.34208	-2.5505	-1.42973	-3.49646	-2.30525	-1.58298
Cul3	7.05653	7.09194	7.07509	7.0517	7.03785	7.07753	7.0222	6.96967
Dock10	5.53422	5.32281	5.38855	5.24873	5.30489	5.35338	5.4393	5.48973
Nyap2	3.27964	3.20101	3.33767	2.99436	3.11538	3.16458	3.06551	2.79914
Irs1	4.31734	3.79948	3.76834	3.42328	3.78364	3.84913	3.86495	3.88759
Rhbdd1	4.37235	4.17119	4.16697	4.47968	4.40236	4.41132	4.28207	4.37247
Col4a4	2.01466	1.70568	1.86275	1.19612	1.25081	2.07252	1.90287	1.02379
Col4a3	1.51102	1.23197	1.68055	1.44597	1.44205	1.35104	1.84316	1.91122
Mff	7.10823	7.25602	7.13478	7.20359	7.16844	7.16153	7.10114	7.05628
Agfg1	6.87585	7.06356	6.91845	6.97872	6.90184	6.99499	6.83608	6.86662
Slc19a3	0.223963	0.47198	0.478349	0.578389	0.717029	0.458906	0.752399	0.352023
Sphkap	5.95134	5.83278	5.82176	5.97179	5.9357	5.98948	5.92696	6.15461
Pid1	3.95195	3.90058	3.94041	3.94932	3.81855	3.80321	4.04208	3.72571
Dner	7.36913	7.41662	7.32538	7.37033	7.33196	7.31765	7.34991	7.39986
Mir5126	1.05324	1.44564	1.74697	1.07644	1.6607	1.22162	1.50935	0.982676
Trip12	7.39009	7.47503	7.5194	7.44642	7.48833	7.54326	7.53333	7.46975
Fbxo36	2.4182	2.60845	2.52392	2.46703	2.74491	2.57464	2.39845	2.72005
Slc16a14	1.45244	1.29083	1.21468	1.96722	1.6607	1.51193	1.51786	1.62095
Sp110	1.35986	0.252633	1.98573	1.95029	1.48219	1.14337	1.75951	0.92958
Sp140	1.11748	1.30993	1.83685	1.26618	1.01942	1.58611	1.24805	1.98594
Sp100	3.01873	2.27596	3.75457	3.40476	3.12301	2.64574	3.43932	2.8021
A630001G21Rik	-1.03651	-0.476738	-0.648365	-0.783087	-0.497132	-1.26216	0.0155472	-1.52254
Cab39	8.39043	8.38305	8.34767	8.39453	8.34887	8.39722	8.32595	8.34088
Itm2c	8.14638	8.19729	8.09337	8.2362	8.15351	8.11606	8.15584	8.09595
4933407L21Rik	-2.16556	-1.93168	-2.27585	-2.5505	-1.62059	-1.70143	-2.30525	-2.75501
Gpr55	-1.4185	-2.92464	-2.27585	-2.5505	-3.64595	-2.23975	-2.30525	-3.06403
2810459M11Rik	-1.09355	0.192157	-0.381843	-2.06432	-0.662342	-0.450967	-0.53366	-0.364928
Psmd1	7.72475	7.767	7.72802	7.79609	7.74538	7.79202	7.68604	7.74537
Htr2b	-1.27962	-1.93168	-1.4839	-2.36962	-1.8406	-2.14942	-1.6428	-3.45781
Armc9	3.91627	3.51057	3.8719	3.82717	3.88594	4.01211	3.86662	4.00901
B3gnt7	-1.57218	-1.29036	-1.77204	-1.32659	-2.41726	-1.26216	-2.18988	-4.88315
Ncl	7.61956	7.58225	7.63978	7.67624	7.63398	7.632	7.59985	7.59684
C130036L24Rik	-0.410968	-0.847951	-1.10346	-1.59813	-0.627752	-0.716826	-0.569274	-2.28447
Nmur1	0.46032	0.252633	0.455831	0.783411	0.545775	0.191492	0.766753	-0.121361
Ptma	7.31673	7.42991	7.40137	7.49755	7.36695	7.34291	7.34484	7.19224
Pde6d	5.59189	5.72218	5.56789	5.50418	5.72938	5.71413	5.53622	5.52058
Cops7b	4.42281	4.60049	4.61855	4.66225	4.50821	4.47217	4.38451	4.42712
Nppc	-2.2934	-2.46904	-2.43506	-2.20891	-2.54054	-3.7384	-1.72076	0.0674327
Dis3l2	4.49593	4.44828	4.44507	4.38367	4.48469	4.43888	4.39494	4.43762
Ecel1	0.0239376	1.28119	0.0375417	1.0449	1.33213	1.55286	-0.163385	-0.391708
Eif4e2	6.13909	6.2928	6.2215	6.28652	6.26281	6.19363	6.1224	6.22516
Efhd1	4.69223	4.52179	4.47197	4.39778	4.54089	4.49772	4.31296	4.52523
Gigyf2	5.55988	5.49593	5.53269	5.44575	5.51828	5.60523	5.59068	5.54682
Kcnj13	0.779102	0.366471	0.565062	-0.080171	0.146861	0.56943	1.46603	-0.475168
Ngef	2.77362	3.06148	2.85171	3.11317	2.86515	2.80106	3.02727	2.9184
Neu2	-1.93956	-1.12735	-2.00207	-3.28925	-1.11031	-1.83588	-1.03306	-2.75501
Inpp5d	2.4634	2.24652	2.72091	2.32326	2.36165	2.70141	2.61621	2.72005
Atg16l1	5.46182	5.55515	5.54874	5.58726	5.59167	5.56369	5.44934	5.42359
Sag	-2.16556	-1.68486	-1.03808	-1.17035	-1.49059	-0.963879	-0.605789	-0.691022
Dgkd	5.52477	5.55865	5.5394	5.41447	5.53316	5.51143	5.46703	5.51338
Usp40	4.27993	4.118	4.24784	4.22032	4.40758	4.35746	4.38567	4.34637
Ugt1a10	3.80557	3.87516	3.94041	3.86829	3.84342	3.87357	3.82607	3.81185
Ugt1a9	3.80557	3.87516	3.94041	3.86829	3.84342	3.87357	3.82607	3.81185
Ugt1a7c	3.84785	3.92091	3.94849	3.92137	3.87089	3.91733	3.86495	3.825
Ugt1a6b	3.79775	3.8639	3.93838	3.85244	3.83104	3.84364	3.8071	3.755
Ugt1a6a	4.27007	4.36627	4.50113	4.3356	4.4221	4.37659	4.26952	4.44047
Ugt1a5	3.85541	3.89743	3.96653	3.87279	3.8934	3.88162	3.86495	3.84807
Ugt1a2	3.80557	3.87516	3.94041	3.86829	3.84342	3.87357	3.82607	3.81185
Dnajb3	0.556161	0.662337	0.500521	0.114706	0.575766	0.29163	0.318056	0.285964
Ugt1a1	3.80557	3.87516	3.94648	3.86829	3.84804	3.87626	3.82949	3.81185
Mroh2a	1.82759	1.83656	2.05479	1.95878	1.86882	2.12775	2.14736	2.23821
Hjurp	6.73832	6.6197	6.78397	6.58744	6.63656	6.65866	6.95249	6.92493
6430706D22Rik	6.52038	6.41745	6.57589	6.39056	6.46614	6.43217	6.74545	6.71308
A730008H23Rik	5.83483	5.79896	5.9314	5.68705	5.77816	5.81081	6.10308	6.0602
Trpm8	5.61989	5.52022	5.49315	5.49982	5.43534	5.47017	5.66105	5.73575
Spp2	-4.24367	-3.59432	-3.05663	-2.36962	-2.19842	-2.5506	-0.984169	-1.40876
Arl4c	5.83052	5.95269	5.87577	5.9135	5.8827	5.90966	5.95034	5.86722
Sh3bp4	4.87152	4.83033	4.81269	5.06637	4.80579	4.72442	4.86411	4.84279
Agap1	6.39671	6.2967	6.41704	6.21526	6.371	6.42484	6.31019	6.36546
Asb18	-2.76325	-2.22961	-1.77204	-0.346784	-1.8406	-0.888872	-1.30596	-1.25333
Ackr3	3.33473	3.29026	3.09334	3.17275	3.38045	3.29094	3.43033	3.13792
Cops8	6.31447	6.37132	6.3564	6.38506	6.36618	6.3156	6.23121	6.19201
Col6a3	5.3856	4.47073	4.91322	4.88566	5.12198	5.17749	5.16975	4.906
Mlph	-0.146682	-0.321723	0.312804	0.259136	0.0646454	0.429899	0.217144	-1.3033
Lrrfip1	4.83569	4.75829	4.79598	4.67647	4.73943	4.6127	4.84309	4.97903
Ramp1	0.646029	0.570296	0.626839	0.928736	1.58899	1.12539	1.38461	0.961671
Ube2f	4.92994	5.04431	4.99651	4.97728	5.00354	4.91767	4.85322	4.93794
Scly	4.45176	4.55619	4.49838	4.49872	4.34256	4.37564	4.40874	4.35747
Espnl	-0.928763	-0.847951	-1.4839	-0.478083	-1.01783	-1.08425	-0.569274	0.475706
Klhl30	-0.604686	-1.76253	-1.17194	-1.50182	-1.15887	-0.888872	-1.19053	-1.3033
Fam132b	-1.93956	-1.34907	-1.5737	-1.50182	-0.809645	-0.4782	-0.53366	-1.52254
Ilkap	4.93975	4.87269	4.89031	4.72454	4.79308	4.91309	4.93652	4.92647
1700020N18Rik	-3.80212	-2.12331	-4.88315	-2.36962	-4.88315	-2.23975	-3.5663	-4.88315
Hes6	4.06216	4.35712	4.14074	4.29092	4.02694	4.28844	4.19718	4.10073
Per2	3.42127	2.78262	3.90344	3.41405	4.05782	4.14856	4.40759	3.49482
Traf3ip1	3.51011	3.54119	3.44731	3.55506	3.463	3.56553	3.46815	3.69263
Asb1	6.45008	6.53219	6.52744	6.47138	6.53455	6.52746	6.40987	6.5124
Twist2	-0.485364	-1.34907	-0.46533	-1.09815	-0.973718	-0.817573	-1.6428	-0.190213
Hdac4	4.89737	4.84022	4.86169	4.79259	4.87677	4.99335	4.95387	4.87334
Ndufa10	7.57334	7.59715	7.51089	7.57688	7.50548	7.50041	7.40343	7.52225
Olfr12	-2.76325	-3.91068	-3.34208	-2.06432	-4.34464	-1.98415	-2.30525	-3.45781
Myeov2	5.45562	5.46484	5.28618	5.38643	5.24081	5.30228	5.13905	5.1969
Otos	-1.83858	-3.91068	-2.43506	-1.93291	-3.17725	-3.10824	-2.71981	-2.01098
Gpc1	7.71349	7.80547	7.71815	7.83277	7.79632	7.79131	7.77415	7.66613
Ankmy1	-1.65563	-0.980896	-1.03808	-1.24636	-0.627752	-0.963879	-1.24709	-0.594534
Dusp28	3.97468	4.1738	3.96852	4.21502	3.93014	3.87222	4.05968	3.97141
Rnpepl1	5.04012	4.76955	4.88083	4.7394	4.88053	4.81974	4.96714	4.94732
9430060I03Rik	2.78948	2.51279	2.75819	2.90935	2.59189	2.91534	2.7773	2.9719
Capn10	5.02847	5.1501	5.06692	5.15951	5.04366	5.06113	5.02873	5.1466
Gpr35	4.89554	5.09198	5.05198	5.0644	5.1565	4.99892	4.72493	4.82981
Kif1a	10.8035	10.7255	10.8534	10.8095	10.8743	10.8816	10.8546	10.8585
Sned1	4.1024	3.58105	3.88671	3.45961	3.79484	3.88296	4.48125	4.39517
Mir6901	-0.690096	-3.33501	-1.31951	-1.81247	-3.39265	-1.46514	-0.569274	-0.533617
Mterf4	4.44551	4.13416	4.38526	4.18096	4.305	4.2681	4.83375	4.75242
Pask	1.37044	1.27148	1.73767	1.44597	1.48219	1.32764	1.80194	1.72433
Ppp1r7	6.16174	6.19827	6.15492	6.24765	6.24834	6.26902	6.18886	6.21466
Mir6902	-2.43368	-2.22961	-2.61405	-2.36962	-1.76347	-1.76709	-2.8895	-0.905824
Ano7	-0.00313432	-0.72623	-0.381843	-0.305545	-0.16407	-0.424239	0.0859231	-0.23801
Hdlbp	8.94291	8.92021	8.91157	8.88564	8.96586	8.96064	8.88193	8.84348
Sept2	6.36761	6.13843	6.16363	5.98743	6.14866	6.14203	6.19451	6.11206
Farp2	4.69223	4.81119	4.65236	4.50598	4.60592	4.64461	4.6132	4.53504
Stk25	7.12864	7.17599	7.18805	7.2523	7.20668	7.19128	7.20344	7.2218
Bok	2.76562	2.99518	3.37114	3.15809	3.42438	3.38462	3.0713	3.01587
Thap4	4.05562	4.08789	4.07023	4.16638	4.38447	4.06377	4.08424	4.18922
Atg4b	6.67888	6.66281	6.6867	6.62825	6.70854	6.61985	6.68368	6.66678
Dtymk	3.89627	3.84274	3.97645	3.95993	3.79325	3.85049	3.90281	3.91925
Ing5	3.70879	3.5188	3.45301	3.48628	3.55621	3.57053	3.60625	3.75652
D2hgdh	3.42382	3.45589	3.31907	2.99023	3.42849	3.30898	3.55961	3.61404
Fam174a	5.69287	5.88226	5.72915	5.86126	5.71513	5.86023	5.83885	5.71511
St8sia4	3.0454	2.89439	3.01848	2.75222	3.00398	3.11077	3.13355	3.29521
Slco4c1	-1.09355	-1.23395	-0.553947	-1.41155	-1.55412	-1.63863	-1.9836	-1.06914
Panct2	-0.524051	-0.41272	-0.265027	-1.24636	-0.436004	-0.963879	-0.336676	0.251764
Slco6c1	-0.563805	-0.935206	-1.10346	-0.572763	-1.20913	-0.424239	-1.30596	0.268965
D1Ertd622e	5.23372	5.22244	5.2284	5.29051	5.2414	5.27858	5.12589	5.26974
Ppip5k2	6.78926	6.66907	6.76492	6.70119	6.68788	6.69968	6.74001	6.80549
Gin1	2.2621	2.33309	2.44609	2.47297	2.23581	2.50681	2.42131	2.32301
Pam	7.62923	7.68903	7.59862	7.65469	7.68829	7.66902	7.61704	7.52996
B230216N24Rik	-0.780881	-0.650438	-0.508958	-0.151454	-0.88935	-0.716826	-1.24709	0.399655
1810006J02Rik	-3.19113	-1.02808	-1.10346	-0.524647	-1.76347	-2.67113	-1.56885	-1.35507
Cntnap5b	2.32332	2.11696	2.2375	2.46703	2.02915	2.13226	2.02731	1.73675
Cdh20	3.27683	3.1778	3.22899	3.05894	3.03939	2.97429	3.03915	2.8021
Rnf152	2.24495	2.09511	2.30204	2.033	2.05067	2.13226	2.66301	2.00146
Pign	3.73974	3.69621	3.79774	3.61535	3.72964	3.69003	4.2441	3.97141
2310035C23Rik	6.30416	6.23963	6.32918	6.29953	6.33829	6.36361	6.2231	6.21105
Tnfrsf11a	4.80089	4.69886	4.6474	4.52182	4.50139	4.60136	4.83034	4.77292
Zcchc2	4.58838	4.55919	4.75852	4.52753	4.66727	4.68737	4.64171	4.51625
Phlpp1	5.24527	5.14811	5.06506	5.08684	5.15712	5.10135	5.15004	5.08298
Bcl2	5.95046	5.94278	6.05359	5.94748	5.96504	5.99383	5.93453	6.07525
Kdsr	5.39858	5.4477	5.32086	5.47932	5.35006	5.37399	5.44433	5.37278
Vps4b	6.97953	7.02976	7.03956	7.15664	7.0459	7.07679	7.07812	7.02751
Serpinb5	-0.240208	0.0403341	-0.265027	0.704863	0.633941	0.208672	0.217144	-0.594534
Serpinb12	-1.74421	-2.60552	-1.88248	-3.28925	-2.67534	-2.67113	-2.71981	-0.794429
Serpinb3a	-2.16556	-3.11528	-2.00207	-2.36962	-2.41726	-2.43938	-2.568	-4.88315
Serpinb10	-3.19113	-3.33501	-3.05663	-4.88315	-3.17725	-1.70143	-1.56885	-1.1583
Serpinb8	3.5779	3.75139	3.77518	3.77766	3.70271	3.66068	3.82264	3.68303
Cdh7	0.746967	0.488838	0.00689098	-0.115372	0.676083	0.156506	0.25836	0.92958
Cdh19	6.24355	5.9181	6.261	5.95439	6.35676	6.4177	6.24056	5.90622
Dsel	4.85277	4.71417	4.56827	4.889	4.79706	4.81835	4.72585	4.74399
Cntnap5a	3.43394	3.6426	3.47277	3.58826	3.60974	3.36943	3.36579	3.30983
Tsn	6.23525	6.25665	6.22775	6.23155	6.21478	6.20277	6.11926	6.29426
Nifk	4.43924	4.29137	4.24292	4.35662	4.30836	4.21914	4.20247	4.15262
Clasp1	7.76479	7.67563	7.76969	7.70269	7.76137	7.73693	7.78796	7.8214
Tfcp2l1	0.357656	-0.381745	-0.156965	-0.524647	0.224642	0.225649	1.09719	-0.121361
Gli2	1.21468	-0.181759	1.04404	0.764171	1.40076	1.33548	1.87664	0.88565
Inhbb	3.74178	3.83288	3.77745	3.72141	3.53155	3.69308	3.6896	4.15494
Ralb	4.51156	4.50117	4.54045	4.40245	4.56258	4.4986	4.59018	4.37446
Tmem185b	3.60281	3.42775	3.45016	3.34127	3.48292	3.41455	3.53256	3.25908
Epb4.1l5	3.47866	3.35146	3.09334	3.5268	3.36979	3.41269	3.69524	3.16574
Ptpn4	3.24554	3.36977	3.17831	3.31175	3.32414	3.32088	2.52628	2.67881
Tmem177	3.68142	3.75139	3.37415	3.67838	3.54299	3.57385	3.41901	3.69263
Tmem37	-0.306107	-1.54104	-0.600384	-0.226443	-0.0681911	-0.158898	-0.569274	0.851801
Dbi	7.34753	7.32219	7.18013	7.1112	6.95112	6.98006	6.90523	7.19055
3110009E18Rik	-0.306107	-0.351422	-0.648365	0.286365	0.0856426	-0.0123634	-0.464967	0.33579
Steap3	5.74769	5.78964	5.77705	5.69786	5.87405	5.80659	5.59521	5.2941
C1ql2	-3.80212	-2.92464	-4.88315	-2.36962	-1.92208	-3.49646	-2.18988	-3.06403
Celrr	-1.83858	-2.60552	-2.81843	-1.70132	-2.82405	-1.90811	-3.08184	-4.88315
Insig2	5.09859	5.05708	5.02355	4.96047	5.00354	5.05817	5.10132	5.17025
Ccdc93	5.31474	5.18672	5.29413	5.12127	5.20168	5.26837	5.35155	5.31754
Htr5b	2.21001	2.50866	2.42306	2.24214	2.21691	2.17222	2.5093	2.09123
Ddx18	3.96073	4.09891	3.88038	3.95357	3.93738	3.85868	3.99409	4.02302
Dpp10	7.23691	7.33185	7.33737	7.31933	7.35322	7.35163	7.24537	7.18376
Actr3	7.93769	7.98031	7.94464	8.01294	7.97337	7.97932	7.94797	7.9647
Slc35f5	4.90922	5.00529	4.8477	5.03058	4.90952	4.87055	4.99255	4.77517
Gpr39	2.59107	3.00107	2.97955	2.74733	2.62095	2.68002	2.61621	2.18029
Lypd1	2.98124	3.307	3.192	2.97776	2.942	3.00411	2.78084	2.31475
Nckap5	0.127414	-0.264098	0.705297	-0.62254	-0.321011	0.225649	0.356525	0.399655
Mgat5	4.73484	4.79179	4.71888	4.69437	4.68887	4.72591	4.71015	4.62713
Tmem163	5.41593	5.3519	5.35928	5.41061	5.29421	5.2247	5.37341	5.47684
Acmsd	-0.828511	-1.76253	-1.4839	-2.06432	-1.37134	-1.043	-0.984169	-0.867729
2900009J06Rik	-0.877766	-1.54104	-1.24384	-2.36962	-0.88935	-1.17047	-1.4985	-1.20503
Ccnt2	5.22864	5.06623	5.30441	5.05355	5.16515	5.09444	5.40644	5.14485
Rab3gap1	5.98746	6.01621	6.03567	5.98898	6.0953	6.04075	6.00206	6.13305
Zranb3	2.78553	2.84287	2.64331	2.62468	2.55095	2.62988	2.97877	2.84861
R3hdm1	6.11372	6.11011	6.14791	6.06367	6.17032	6.16036	6.16264	6.04966
Ubxn4	6.78036	6.77487	6.75745	6.66923	6.76617	6.76465	6.68793	6.73645
Lct	1.44244	1.98653	1.64117	1.84435	1.66768	1.99046	1.68589	1.18652
Mcm6	3.35619	3.29506	3.39205	3.47153	3.58599	3.4583	3.42581	3.2374
Dars	5.94427	5.90167	5.85387	5.79052	5.83855	5.75855	5.75178	5.74038
Cxcr4	4.25444	4.12206	4.07762	3.97674	3.89042	3.85459	4.2051	4.10672
Thsd7b	3.96946	4.00681	4.0497	4.1349	3.92141	3.94962	4.02427	3.93954
Cd55b	-1.4185	0.0172795	-0.0564361	-0.389236	-0.214511	0.0461503	-0.936882	-0.143949
Cd55	8.3211	8.44233	8.41488	8.40213	8.38862	8.41271	8.38784	8.28497
C4bp-ps1	-2.76325	-2.46904	-3.69829	-2.5505	-2.19842	-3.7384	-1.89056	-2.18743
Pfkfb2	5.62266	5.47809	5.67778	5.60899	5.64437	5.68718	5.75674	5.72566
Yod1	3.34282	3.66503	3.65924	3.57728	3.61516	3.50772	3.61817	3.63741
AA986860	2.73727	2.65026	2.86031	3.03104	2.62812	2.73144	2.60027	2.84287
Fcmr	-2.04814	-2.12331	-1.39937	-2.5505	-2.98987	-1.52069	-0.936882	-4.88315
Mapkapk2	5.25244	5.24432	5.32785	5.31799	5.29252	5.20665	5.13006	5.13609
Dyrk3	2.38204	2.26621	2.6923	2.55921	2.51271	2.37225	2.53888	2.32712
Eif2d	4.51752	4.4472	4.41474	4.51031	4.41693	4.41503	4.4549	4.55358
Rassf5	7.00926	7.01383	7.03245	7.02113	7.01597	6.96545	7.00962	6.97377
Ikbke	0.794905	0.0630261	0.500521	0.144772	0.703509	0.659646	1.13087	0.972212
Srgap2	5.96843	5.92663	5.89001	5.77137	5.94363	5.89845	6.025	5.87145
Fam72a	0.440363	-0.129366	-0.156965	0.0205555	-0.0451848	0.400298	0.237899	-1.1583
Ctse	-0.208355	1.2118	1.30564	0.979668	0.186276	0.0269082	2.49213	1.45802
Rab7b	1.90972	1.57758	1.84553	2.54237	2.00731	2.00036	2.14186	2.01682
Pm20d1	-0.272782	0.0630261	0.500521	-0.226443	0.451867	0.0651392	0.356525	-0.418995
Slc41a1	5.28847	5.09404	5.30991	5.18052	5.3326	5.36396	5.43705	5.19858
Rab29	2.12505	2.13314	1.65112	1.8983	1.92233	1.84972	1.90935	2.1294
Nucks1	6.31824	6.3342	6.39427	6.36724	6.32897	6.37483	6.35423	6.38433
Slc45a3	4.93441	5.29132	5.0632	5.2057	5.25999	5.28314	5.04943	5.0981
Elk4	3.49084	3.47505	3.5963	3.47744	3.60792	3.47259	3.39842	3.18851
Mfsd4	3.65785	3.66131	3.58596	3.53817	3.54109	3.70069	3.45713	3.35483
Cdk18	2.46833	2.75153	2.67778	2.66154	2.91879	2.76957	2.88977	2.60961
Lemd1	-1.4185	-1.02808	-1.88248	-0.840835	-1.20913	-2.06442	-1.24709	-0.190213
Klhdc8a	5.097	5.25298	5.19904	5.32293	5.1565	5.15939	5.08566	5.0975
Nuak2	0.269918	0.505502	0.500521	0.390414	0.24345	0.0269082	0.91588	1.03389
Tmcc2	6.39314	6.67253	6.45833	6.55911	6.39538	6.35567	6.60797	6.44234
Dstyk	5.77533	5.7613	5.83327	5.74094	5.791	5.74867	5.77549	5.68339
Rbbp5	5.52773	5.67416	5.65819	5.502	5.52406	5.53418	5.57955	5.66929
Tmem81	1.07928	0.920214	1.21468	1.02886	1.20357	0.501351	1.5842	1.08334
Cntn2	8.28029	8.28986	8.27215	8.26514	8.32431	8.33807	8.32724	8.40926
Nfasc	8.44505	8.22868	8.34509	8.21432	8.38452	8.37057	8.33479	8.4516
Lrrn2	5.40889	5.41885	5.30126	5.46301	5.3326	5.33198	5.39494	5.54285
Mdm4	5.85193	5.55014	5.92936	5.37221	5.67932	5.7516	6.0774	5.99515
Pik3c2b	3.15966	3.21374	3.07867	3.03907	2.86819	2.89426	3.21954	2.81387
Ppp1r15b	6.11175	6.08365	6.1658	6.03386	6.08426	6.1263	5.96946	6.01726
Plekha6	8.82172	8.75486	8.88837	8.77368	8.80815	8.79946	8.95068	8.95305
Gm19461	4.85842	4.73198	4.76426	4.82545	4.54847	4.73705	4.71756	4.83342
Ren2	-2.76325	-2.12331	-4.17236	-1.93291	-1.8406	-4.02924	-3.08184	-4.88315
Ren1	-2.76325	-2.12331	-4.17236	-1.93291	-1.8406	-4.02924	-3.08184	-4.88315
Etnk2	0.871424	0.856693	0.850467	1.16712	0.870095	1.4698	1.31794	1.05387
Sox13	3.95371	4.0112	4.03838	3.93002	4.17878	3.91864	4.05968	4.15956
Snrpe	3.5779	3.84274	3.9705	3.8433	3.65785	3.63549	3.62212	3.81625
Zc3h11a	6.39897	6.29968	6.59533	6.20415	6.45786	6.43034	6.51538	6.5339
Zbed6	4.55164	4.37649	4.76769	4.18096	4.47776	4.60785	4.54925	4.68033
Lax1	-1.57218	-1.68486	-1.10346	-0.389236	-1.37134	-1.57845	-2.18988	-2.09651
Atp2b4	6.75255	6.71188	6.69664	6.82415	6.76109	6.80014	6.91754	6.77176
Mir6903	0.810537	0.734792	0.901349	0.783411	1.05179	0.582668	1.34689	0.851801
Optc	-2.04814	-1.93168	-3.69829	-4.88315	-3.64595	-2.94737	-3.88738	-4.88315
Prelp	5.61767	5.21296	5.23337	5.25391	5.25883	5.10078	5.52887	5.44361
Fmod	3.81335	2.77577	3.45868	3.89065	3.79165	3.68543	5.03319	4.01794
Btg2	3.13504	3.35146	2.91498	3.00669	3.19965	3.01636	3.13631	3.48933
Chit1	-0.208355	-0.351422	-0.508958	0.0526266	-0.214511	0.275415	0.217144	0.0275617
Chil1	1.23799	1.30041	1.28023	1.1073	1.79425	1.77672	1.78088	1.96499
Mybph	4.91103	4.91541	5.0697	4.93811	5.09957	4.97841	5.03097	4.78043
Adora1	7.0415	7.09864	7.135	7.10333	7.09995	7.10244	7.03207	6.90202
Ppfia4	6.56599	6.53574	6.59598	6.47656	6.55539	6.51284	6.55417	6.65803
Tmem183a	6.14642	6.28317	6.22775	6.23461	6.35163	6.33578	6.16095	6.03748
Cyb5r1	6.77862	6.85243	6.71986	6.87744	6.90591	6.85351	6.72905	6.66048
Adipor1	7.77964	7.83399	7.77283	7.85325	7.78272	7.77266	7.71732	7.77418
Klhl12	5.22646	5.39054	5.32475	5.39506	5.25883	5.35096	5.2758	5.24821
Rabif	5.66519	5.58779	5.55338	5.57696	5.56388	5.59954	5.58715	5.37029
Kdm5b	5.19256	5.14412	5.10901	5.11654	5.16454	5.01182	5.16908	5.06093
Syt2	7.77217	7.77948	7.81463	7.81271	7.78212	7.783	7.80925	7.81116
Ppp1r12b	4.8309	4.78242	4.72713	4.68417	4.682	4.80852	4.75854	4.84709
Ube2t	-0.00313432	0.58605	-0.46533	0.365096	-0.240408	-0.4782	-0.761858	-0.944953
Lgr6	-0.981629	-0.444374	-0.2281	-0.783087	-0.697782	-1.08425	0.298431	-0.0772205
Ptprv	-2.16556	-2.34437	-1.66947	-2.75737	-3.39265	-2.33611	-1.30596	-0.905824
Ptpn7	-0.272782	0.42019	0.386089	0.857903	0.106339	-0.115491	0.567998	0.0476349
Arl8a	8.58895	8.63556	8.60098	8.67137	8.63847	8.61148	8.58778	8.51819
Gpr37l1	6.45288	6.51171	6.32491	6.41003	6.34075	6.4147	6.12658	6.30707
Rnpep	4.86966	4.92163	4.86276	4.88455	4.79786	4.67041	4.71941	4.74014
Timm17a	6.17198	6.26585	6.10695	6.15514	6.11969	6.13531	5.99598	6.06174
Lmod1	1.1547	0.0172795	0.543867	0.578389	0.575766	1.01253	0.466133	-0.287446
Shisa4	6.06649	6.15931	5.94258	6.09769	6.12381	6.04524	5.93413	5.9987
Ipo9	6.62879	6.64811	6.64065	6.58573	6.54359	6.60066	6.60498	6.69509
Nav1	8.05275	7.84191	8.04375	7.91412	8.12654	8.16412	8.12961	8.11085
Mir1231	-2.2934	-2.75628	-2.27585	-4.88315	-2.41726	-4.02924	-1.9836	-1.78117
Csrp1	7.01391	7.03694	7.05087	7.1439	7.01802	7.06358	6.98662	7.04321
Phlda3	5.63697	5.59268	5.5246	5.61706	5.66544	5.65347	5.56422	5.68018
Tnni1	1.05324	0.601633	0.917918	0.556189	0.905952	0.942374	0.298431	0.940357
Lad1	-1.09355	-2.02432	-1.4839	-2.5505	-1.2612	-1.90811	-1.89056	-0.446808
Pkp1	-1.65563	-1.76253	-2.13247	-1.32659	-1.92208	-1.57845	-1.80316	-1.52254
Igfn1	0.628498	-0.0541809	-1.5737	-0.524647	0.126742	-0.372222	0.108639	-1.64607
Tmem9	5.60931	5.73592	5.75128	5.80765	5.80016	5.72424	5.74546	5.7241
Cacna1s	1.23799	-0.181759	-0.341844	0.231384	-0.0681911	-0.0527341	0.500893	-1.46453
Kif21b	5.13862	4.88945	5.06413	4.84045	4.89918	4.75178	5.08709	5.1969
5730559C18Rik	-4.24367	-3.11528	-2.61405	-2.20891	-2.10031	-3.10824	-4.88315	-2.50064
Gpr25	-3.80212	-1.41026	-3.05663	-1.81247	-1.20913	-1.46514	-2.30525	-1.78117
Camsap2	7.56112	7.53801	7.62802	7.60013	7.59584	7.67396	7.58183	7.51776
9230116N13Rik	0.556161	0.0853667	0.181728	-0.115372	0.146861	0.307664	0.616355	-0.338635
Ddx59	3.22819	3.307	3.26829	3.285	3.20685	3.13344	2.91254	2.78725
Kif14	-1.27962	-0.72623	-0.156965	-1.09815	-1.06333	-1.0029	0.217144	-2.01098
Zfp281	4.3578	4.34328	4.28184	4.31261	4.3545	4.32731	4.37985	4.14099
Gm19705	-1.2149	-0.476738	-0.749398	-2.75737	-1.37134	-0.653368	-0.936882	-1.1583
Nr5a2	0.574588	0.366471	0.543867	0.286365	0.146861	0.339207	0.534836	0.951053
Ptprc	2.3503	2.13849	2.76736	2.14136	2.61735	2.53773	3.34681	2.64298
Nek7	8.16939	8.12018	8.06506	8.11933	8.07407	8.09376	8.07857	8.11316
Lhx9	-2.58907	-1.68486	-1.77204	-3.65309	-2.19842	-2.94737	-2.8895	-2.75501
2310009B15Rik	1.96664	2.03325	1.97785	2.19263	1.72902	2.00036	2.01533	1.86672
Dennd1b	5.24958	5.1098	5.17253	5.18234	5.1817	5.22048	5.25749	5.30716
Crb1	-0.928763	-0.321723	-0.915596	-0.674096	-1.69026	-0.450967	0.393993	0.33579
Zbtb41	5.02513	4.96745	4.98672	4.90884	5.08466	5.03909	4.92377	5.003
Aspm	-0.447686	-0.57843	-0.97554	0.0526266	-0.809645	0.191492	0.600415	-1.46453
Cfh	5.41401	4.84104	4.91011	5.1241	5.2267	5.36156	5.7041	4.94398
Kcnt2	3.14123	3.53309	3.15753	3.09018	3.03939	3.25004	3.13907	2.7325
4930590L20Rik	-0.981629	-0.264098	0.12577	0.0205555	-1.06333	-0.249839	-1.43142	-2.75501
Cdc73	3.83453	4.08927	3.97645	4.02199	3.7528	3.92385	3.94128	3.5937
B3galt2	3.72125	3.43647	3.27473	3.19807	3.26784	3.097	3.31053	3.50575
Glrx2	4.90922	5.15605	5.06692	5.02554	5.10151	5.08575	5.04943	4.9751
Trove2	5.75931	5.75041	5.71796	5.64494	5.69819	5.74904	5.57344	5.66483
Uchl5	5.07614	5.06483	5.07802	4.8621	4.80816	4.98714	4.92617	5.05599
Rgs2	3.40076	3.45374	3.39501	3.34127	3.31082	3.4034	3.32272	3.31811
Rgs18	-0.877766	-1.76253	-0.508958	-0.727563	-0.662342	-0.783203	0.174716	-1.02655
Brinp3	1.23799	1.31938	1.36726	1.49348	1.29655	1.29584	1.63203	2.21621
Pla2g4a	1.19099	0.570296	0.585949	1.29328	1.36685	0.890088	1.8227	1.02379
Ptgs2	-1.65563	-2.46904	-2.27585	-1.93291	-2.54054	-2.23975	-1.72076	-4.88315
BC003331	6.21593	6.26677	6.22359	6.16066	6.11011	6.19633	6.15618	6.23176
Tpr	6.91886	6.83914	6.96802	6.84061	6.9266	6.87452	6.96012	6.99363
Prg4	3.17785	2.58904	3.06013	3.45662	3.44483	3.52153	4.65721	2.85146
Hmcn1	3.24842	3.10313	3.29707	3.18003	3.16308	3.23754	3.63783	3.47272
Ivns1abp	7.63006	7.56124	7.61824	7.44491	7.58862	7.56385	7.69568	7.71373
Swt1	3.18686	3.31174	3.22567	2.93538	3.20446	3.24172	3.14732	3.00564
Trmt1l	5.27867	5.28168	5.21924	5.29471	5.19203	5.22945	5.23638	5.37873
Rnf2	3.79775	3.67795	3.81774	3.87055	3.8012	3.61147	3.69898	3.93819
Fam129a	5.04344	4.74081	4.75391	4.6294	4.78748	4.85631	4.89465	4.74245
Edem3	5.94206	5.86259	5.87524	5.81176	5.95509	5.87846	5.88317	5.92397
1700025G04Rik	6.24247	6.17274	6.25694	6.1889	6.1355	6.14983	6.19451	6.21577
Tsen15	4.80772	4.84596	4.72831	4.8553	4.66291	4.66108	4.65624	4.81231
Colgalt2	5.7426	5.7083	5.66802	5.79645	5.70795	5.70621	5.673	5.66483
Rgl1	6.3742	6.35101	6.36813	6.32396	6.37473	6.38643	6.36459	6.41024
Arpc5	7.36235	7.42047	7.38134	7.44491	7.3699	7.45457	7.33418	7.35513
Ncf2	2.87374	2.76543	2.8256	2.67706	2.80629	3.03334	2.9413	2.76923
Smg7	6.26604	6.19987	6.20092	6.18347	6.27771	6.20946	6.2041	6.19876
Nmnat2	7.19211	7.20847	7.27442	7.22001	7.20773	7.14545	7.17749	7.2641
Lamc2	1.858	1.55374	1.50524	1.19612	1.68154	1.70589	2.23256	1.96499
Lamc1	7.14627	6.70806	6.82627	6.65917	6.82472	6.84873	6.7194	6.7642
E330020D12Rik	-4.88315	-2.34437	-2.13247	-3.65309	-3.39265	-4.88315	-1.72076	-2.90126
Shcbp1l	-0.928763	-1.61116	-1.03808	-2.5505	-1.20913	-1.08425	-1.08366	-2.62222
Dhx9	7.1011	6.95039	7.12945	7.03474	7.10157	7.09466	7.12553	7.15007
Npl	1.43237	1.64681	1.40301	1.73989	1.25081	1.47691	1.74508	1.6671
Rgs8	5.9278	6.07948	6.09562	6.03486	5.98263	5.99041	5.99446	5.73498
Rgs16	1.57648	1.24195	0.950497	0.704863	0.648126	0.732724	1.5842	1.67357
Rnasel	4.15079	4.19707	4.23136	4.33885	4.29151	4.18808	4.32877	4.05312
Rgsl1	-0.240208	-0.129366	-0.858043	0.259136	-0.000244495	0.275415	0.693513	0.352023
Teddm2	-0.981629	-3.33501	-1.88248	-1.32659	-1.92208	-1.76709	-0.846717	-1.06914
Mir8114	4.70064	4.76436	4.8861	4.65051	5.05834	4.88799	4.98567	4.54213
Glul	8.61693	8.57054	8.71158	8.76659	8.93297	8.91124	8.86618	8.54844
Zfp648	-1.03651	-1.93168	-1.4839	-1.93291	-1.55412	-1.46514	-2.71981	-1.40876
Cacna1e	3.55256	3.40794	3.70531	3.59916	3.7061	3.66224	3.99103	3.80155
Ier5	2.88486	3.2488	2.735	3.17275	2.85907	2.81795	3.0183	3.33455
Mr1	3.09411	3.03303	2.91498	3.26119	2.87423	3.1016	2.99715	3.27832
Stx6	5.58111	5.54511	5.4114	5.59273	5.49787	5.49007	5.38915	5.52551
Xpr1	6.359	6.32279	6.4068	6.25284	6.4566	6.38147	6.24633	6.38359
Gm5532	-3.19113	-3.91068	-2.27585	-3.65309	-3.39265	-1.70143	-2.568	-3.24753
Acbd6	5.13785	5.15539	5.13316	5.21015	5.1633	5.04807	5.11751	5.13022
Qsox1	5.76584	5.7626	5.72797	5.859	5.88383	5.79206	5.77992	5.65546
Cep350	5.97884	5.81993	6.01945	5.83902	6.01822	6.06128	6.03356	6.09799
Tor1aip1	5.5668	5.35535	5.44752	5.3974	5.36516	5.40413	5.44656	5.46289
Tor1aip2	6.38632	6.2631	6.4068	6.34191	6.31264	6.26029	6.32087	6.42566
Fam163a	1.32763	0.920214	1.08863	1.23857	0.870095	0.473193	1.19596	1.55236
Tdrd5	-0.485364	-0.72623	-0.422983	-0.783087	-0.809645	-0.622657	-0.53366	0.368076
Nphs2	-0.690096	-1.41026	-0.915596	-0.963764	-0.697782	-0.684748	0.298431	-1.3033
Soat1	4.66884	4.62357	4.61475	4.60392	4.62397	4.66264	4.83034	4.56668
Abl2	5.90158	5.67508	5.85602	5.80471	5.70922	5.88583	5.81271	5.97301
Tor3a	3.15966	3.29026	3.71245	3.78245	3.12301	3.22704	2.92219	3.19077
Fam20b	6.88926	6.9272	6.93787	6.86705	6.85961	6.86541	6.84752	6.88225
Ralgps2	5.87162	5.69065	5.68021	5.78217	5.84856	5.81362	5.95544	5.98477
Angptl1	2.20411	1.82996	1.70939	1.75946	1.92815	1.68763	2.05096	1.92214
Tex35	-3.80212	-3.11528	-3.34208	-2.36962	-3.95341	-2.06442	-2.18988	-2.62222
Rasal2	7.01602	6.6563	6.70918	6.58778	6.70622	6.68728	6.64365	6.78751
2810025M15Rik	3.10999	2.88805	2.68747	3.12076	3.09481	3.22915	3.02727	2.94004
BC026585	2.38726	2.47098	1.84553	1.88054	2.07187	2.26957	2.17453	1.99113
Sec16b	0.929844	0.790245	1.34293	0.643011	0.870095	0.8794	0.966501	1.03389
Brinp2	5.72621	5.72796	5.64829	5.76715	5.82417	5.66945	5.68675	5.66279
Astn1	6.78506	6.73899	6.86043	6.72844	6.84967	6.85743	6.77416	6.81101
Pappa2	3.6793	3.59668	3.47557	3.62338	3.5823	3.84501	3.78963	3.99098
Rfwd2	5.43811	5.58779	5.42523	5.33683	5.48804	5.43	5.38218	5.30247
Tnr	3.1257	3.36977	3.41558	3.59372	3.55244	3.38084	3.44155	3.25477
4930523C07Rik	2.09345	1.13891	1.83685	1.76914	1.50575	1.82765	2.02731	1.91122
4930562F07Rik	0.841301	-0.236126	0.235595	0.0205555	-0.139497	0.174105	0.174716	0.125246
Tnn	-3.19113	-1.76253	-2.61405	-1.32659	-2.3037	-2.5506	-1.56885	-1.71204
Mrps14	4.16758	4.11529	4.02123	4.17187	4.10357	4.16736	4.05676	4.25112
Cacybp	6.57575	6.77745	6.63189	6.58778	6.635	6.64275	6.4446	6.5564
Rabgap1l	6.95249	6.93452	6.97843	6.88915	6.93982	7.03135	7.0653	7.00314
Gpr52	-0.524051	0.0172795	-0.422983	-0.188461	-0.662342	-0.372222	-0.30631	0.561972
Rc3h1	6.599	6.57968	6.57719	6.45572	6.54287	6.6108	6.51219	6.5485
Serpinc1	-4.24367	-1.93168	-2.81843	-3.65309	-2.98987	-3.10824	-2.08306	-4.88315
Zbtb37	1.74051	1.61645	1.65112	1.90709	1.68154	1.88755	1.69342	1.60749
Gas5	5.26668	4.97346	5.22007	4.95624	5.00492	4.95696	5.10274	5.41492
Snord47	-1.27962	-2.92464	-1.10346	-1.24636	-0.771386	-1.57845	-1.08366	-0.262516
Dars2	4.38023	4.33747	4.1635	4.18639	4.22565	4.16075	4.15415	4.27047
Cenpl	1.6737	1.52133	1.64117	1.79781	1.58899	1.44101	1.65536	1.89469
Klhl20	6.07743	6.05103	5.93751	5.94374	6.05329	6.01045	5.88728	6.03905
Ankrd45	4.48988	4.54817	4.52431	4.5985	4.61858	4.48544	4.59522	4.61541
Prdx6	6.4479	6.41745	6.39538	6.4531	6.43503	6.46427	6.3737	6.39072
Suco	5.63752	5.51354	5.72797	5.62041	5.67802	5.62696	5.55029	5.66401
Pigc	4.11819	4.09203	4.13544	3.95357	4.13034	4.18916	4.16503	3.99744
Dnm3	8.87867	8.80162	8.922	8.86038	8.83004	8.89085	8.98062	9.03022
2810442N19Rik	-2.58907	-2.46904	-2.27585	-4.88315	-3.39265	-2.43938	-2.30525	-0.985172
Dnm3os	-1.2149	-1.61116	-1.10346	-0.840835	-1.76347	-1.31029	0.196086	-0.867729
Mettl13	3.63608	3.75314	3.6394	3.84559	3.75444	3.77177	3.76124	3.89453
Vamp4	6.50395	6.52199	6.46926	6.51339	6.47138	6.46739	6.53909	6.49788
Myoc	3.82879	3.34684	3.28754	3.70385	3.42025	3.47259	4.03469	3.64071
7420461P10Rik	0.779102	0.212599	0.606539	0.744672	0.166703	0.0651392	1.2884	0.682408
Prrc2c	7.58333	7.31733	7.60694	7.30422	7.48698	7.49769	7.66404	7.58733
Fmo4	-0.0588514	-0.0299654	-0.122671	-1.02939	-0.266778	-0.181102	0.375381	0.00720526
Fmo1	5.28428	5.07533	5.18713	5.02048	5.3506	5.46124	5.40873	5.3623
Fmo2	3.57562	3.18816	3.53854	3.67581	4.74274	4.73927	4.55857	3.62744
Fmo6	-2.04814	-1.41026	-2.43506	-1.93291	-1.49059	-1.52069	-1.89056	-4.88315
Prrx1	3.56874	2.76543	2.84739	3.08244	3.08181	3.00903	3.60625	3.02349
Gorab	2.93563	2.85267	3.22234	2.89615	2.88325	2.96421	3.15825	3.42172
Kifap3	8.40981	8.36939	8.40563	8.39404	8.40679	8.45026	8.41451	8.52273
Scyl3	4.49955	4.37423	4.67934	4.43779	4.49846	4.59239	4.57395	4.39517
BC055324	1.69912	1.69118	1.98573	2.11881	1.85666	2.40987	2.10279	1.68001
Mettl18	1.71582	1.38389	1.51616	1.45799	1.42567	1.11631	1.27842	1.08334
Sell	-1.49329	0.437661	1.17388	0.621791	0.676083	0.582668	1.5679	-2.01098
Selp	-0.375161	-0.613985	-0.2281	-0.151454	0.385684	-0.346901	0.0859231	-1.58298
Gm16548	-1.57218	-2.22961	-2.43506	-1.59813	-1.20913	-2.33611	-2.568	-4.88315
F5	-0.563805	-0.935206	-0.422983	-0.524647	0.280344	0.191492	1.01541	0.41519
Slc19a2	4.82994	4.90837	4.71415	4.73075	4.84864	4.91178	4.82435	4.85779
Ccdc181	4.74606	4.72666	4.65484	4.72454	4.76732	4.59892	4.67634	4.59594
Blzf1	4.76022	4.74081	4.76082	4.63073	4.74109	4.87459	4.72033	4.74783
Nme7	6.37781	6.3266	6.31361	6.20325	6.33638	6.4356	6.27077	6.50855
Atp1b1	10.5973	10.5898	10.5452	10.553	10.5783	10.5742	10.5132	10.5564
Dpt	0.944087	0.0853667	0.432957	1.30664	0.24345	1.11631	0.318056	0.16254
Gm20743	0.499423	0.366471	-0.156965	0.684539	0.333976	0.415175	0.298431	1.14985
Sft2d2	5.64026	5.40004	5.32319	5.48594	5.48162	5.5329	5.49316	5.67696
Tiprl	5.61154	5.66955	5.6551	5.48594	5.61668	5.62935	5.58005	5.62864
Gpr161	4.16606	4.01557	4.07578	4.11035	4.08414	4.09182	4.27831	4.16416
Dcaf6	6.37617	6.44066	6.37902	6.44971	6.35595	6.32178	6.44013	6.36346
Mpc2	5.74972	5.74867	5.48414	5.63372	5.52742	5.47551	5.44823	5.46476
Adcy10	-1.65563	-3.91068	-2.61405	-4.88315	-1.42973	-3.28933	-2.568	-2.75501
Mpzl1	4.71525	4.50635	4.52971	4.33723	4.36742	4.35361	4.46923	4.28534
Rcsd1	4.27712	4.30333	4.25926	4.11605	4.06312	4.17393	4.35275	4.4668
Creg1	4.71836	4.81454	4.67325	4.76018	4.58487	4.7026	4.69335	4.67872
Cd247	2.75354	2.18578	2.6729	2.49063	2.44932	2.68309	2.76663	2.3596
Pou2f1	4.52346	4.25488	4.43359	4.43931	4.34147	4.4407	4.48343	4.3011
Dusp27	1.32763	1.18101	1.4379	1.07644	1.03029	0.501351	0.954011	1.14985
Mael	-3.80212	-2.92464	-2.43506	-2.99893	-1.76347	-1.90811	-2.43065	-4.88315
Ildr2	3.66647	3.49187	3.63188	3.67323	3.77397	3.82705	4.24153	3.85093
Tada1	4.01403	4.14351	4.03838	3.80851	4.05116	4.07787	4.04944	4.27047
Pogk	6.13754	6.09849	6.18518	6.10392	6.1971	6.22326	6.08566	6.04748
Gm16701	0.440363	0.366471	0.8331	-0.305545	0.575766	0.582668	-0.0584384	0.445765
Fam78b	5.81462	5.83854	5.86192	5.63372	5.94973	5.85751	5.79313	5.80187
Uck2	5.50749	5.64296	5.44466	5.46896	5.56435	5.51962	5.26951	5.24387
Tmco1	5.35527	5.3351	5.35928	5.40674	5.35601	5.34466	5.30989	5.30247
Aldh9a1	5.8772	5.76951	5.76908	5.95704	5.8627	5.70885	5.79707	5.88824
Mgst3	6.03731	6.09986	5.91808	6.00802	5.8699	5.77233	5.89506	5.93782
Rxrg	3.9712	4.08234	3.85048	3.87951	3.86938	3.62912	3.77017	4.02428
Pbx1	5.65549	5.46537	5.55272	5.58658	5.53221	5.59056	5.46373	5.61104
Nuf2	0.499423	0.0630261	0.0675548	0.114706	0.126742	0.415175	0.600415	-0.0343901
Rgs5	6.02898	6.15767	6.09653	6.08757	5.9721	5.97669	6.03059	5.79966
Rgs4	9.84486	10.0826	9.96802	10.0524	9.93364	9.95849	9.91583	9.82726
1700084C01Rik	-1.15295	-0.890919	-0.265027	-0.346784	-1.49059	-0.4782	-0.984169	-0.121361
Hsd17b7	6.51949	6.49538	6.4822	6.55387	6.55633	6.53684	6.3569	6.50152
3110045C21Rik	0.292358	-0.181759	0.565062	-0.115372	-0.214511	-0.0733511	0.318056	0.84034
Ddr2	5.08259	4.47814	4.64865	4.61872	4.72194	4.70639	5.15891	4.99398
Uap1	6.12509	6.14043	6.0132	6.03185	6.0823	6.16367	6.13732	6.05432
Uhmk1	7.13409	7.21514	7.2423	7.24582	7.16844	7.19586	7.18636	7.09567
Sh2d1b1	-2.04814	-2.75628	-3.05663	-4.14082	-2.98987	-2.14942	-3.5663	-2.18743
Gm7694	2.5544	2.20121	2.58225	2.13388	2.21691	2.03929	2.53049	2.87412
1700015E13Rik	-1.03651	-1.02808	-0.600384	-1.41155	-0.848948	-1.70143	-1.56885	0.368076
Nos1ap	2.79734	2.76543	2.90671	2.50809	2.94775	2.99671	3.03915	3.18625
Olfml2b	4.88266	4.73816	4.74466	4.7914	4.91393	4.83849	4.61717	4.99462
Atf6	6.0227	6.0049	6.02136	6.04337	6.11905	6.06748	5.90725	5.96116
Dusp12	3.47621	3.28786	3.34381	3.21941	3.31749	3.23754	3.46595	3.36085
Fcrlb	-0.240208	-0.0541809	0.261793	-1.17035	0.402517	-0.749633	0.0155472	0.383952
Fcrla	-1.93956	-2.46904	-2.00207	-1.50182	-0.466244	-1.043	-0.569274	-4.88315
Fcgr2b	2.18624	2.03325	2.38184	2.15619	2.04532	2.4681	2.36109	2.31475
Fcgr4	-0.981629	-1.07686	0.8331	0.802398	-0.88935	-0.925888	0.153025	-0.867729
Fcgr3	2.38204	2.35624	2.43462	2.68731	2.70137	2.57464	2.4878	2.25125
Cfap126	1.10486	0.957026	0.646857	0.365096	1.10418	0.790915	0.584298	0.69519
Sdhc	6.21996	6.31276	6.31439	6.42734	6.23841	6.3156	6.1623	6.24784
Mpz	12.3068	11.7881	11.7299	11.7089	11.962	11.951	11.1139	11.689
Pcp4l1	8.01171	8.03819	7.98672	8.08667	7.946	7.97971	7.96538	8.05447
Nr1i3	1.76479	1.76224	2.12782	1.60582	1.84439	1.59267	2.07998	1.72433
Tomm40l	5.25173	5.42598	5.33558	5.34008	5.30991	5.31324	5.20378	5.3638
Apoa2	2.70836	2.7054	2.87311	3.1283	3.01223	2.94383	2.88977	2.82554
Fcer1g	2.17421	2.58513	2.57182	2.54801	2.62812	2.47521	2.5882	2.79321
Ndufs2	7.4077	7.43386	7.38675	7.43011	7.40517	7.36774	7.29866	7.39742
Adamts4	1.13	0.291585	0.362072	-0.080171	-0.0915702	-0.0733511	-0.721229	0.533786
B4galt3	5.02261	5.06483	4.97588	4.95199	4.98271	4.92614	4.84901	5.07506
Ppox	3.234	2.98035	3.35906	2.84212	3.05278	3.20581	3.70831	3.54158
Usp21	3.88892	4.09065	4.1212	3.93433	4.05516	3.98993	4.04356	4.0419
Ufc1	6.0915	6.21673	6.17013	6.29744	6.02129	6.15677	6.00887	6.08074
Dedd	4.97051	5.03142	5.06506	4.92409	4.9771	4.91309	4.90117	4.89911
Nit1	4.43168	4.4897	4.48315	4.30929	4.36956	4.33515	4.40186	4.55183
Pfdn2	5.00064	5.16394	4.99846	5.11559	5.04634	5.03729	4.97412	5.17995
Klhdc9	4.02914	4.08234	3.96653	4.16638	3.97725	4.03155	3.86662	4.11269
Pvrl4	4.91013	4.93937	4.96695	4.96047	4.88353	4.94932	4.88974	4.92647
Arhgap30	1.47223	1.76916	1.97785	1.66925	1.78786	1.78819	2.33725	1.60071
Usf1	4.95389	5.09817	5.13139	5.08974	4.97429	4.98839	4.93016	4.95199
Tstd1	1.10486	1.42827	1.51616	1.49348	1.48219	1.38921	1.57607	1.49504
F11r	3.6793	3.47716	3.67395	3.64983	3.60611	3.35214	3.56372	3.50029
Alyref2	1.26092	1.4195	1.48314	1.31988	0.975098	1.49102	1.22744	1.58706
Cd244	-2.58907	-1.29036	-1.5737	-1.59813	-2.3037	-2.33611	-1.9836	-3.24753
Ly9	1.3492	1.30041	1.22803	1.26618	0.917709	1.25508	1.20653	0.961671
Slamf7	-0.375161	-0.264098	-0.0891735	-1.50182	-0.348911	-0.592585	-0.109958	0.198895
Cd48	-0.0307239	0.3846	0.666601	0.259136	0.224642	0.225649	0.836454	0.302764
Slamf1	-2.58907	-3.59432	-3.34208	-4.88315	-2.3037	-2.33611	-1.72076	-4.88315
Cd84	0.176496	0.366471	0.686079	1.07644	0.385684	0.708773	1.13087	0.781625
Slamf6	-2.96139	-2.34437	-1.39937	-1.93291	-2.98987	-4.39392	-1.30596	-4.88315
Vangl2	1.44244	0.882438	1.18761	1.66925	1.05179	1.03196	0.876714	1.09303
Nhlh1	-1.15295	-1.47417	-2.81843	-2.75737	-3.39265	-1.90811	-2.71981	-0.75913
Ncstn	6.42871	6.58042	6.51763	6.49528	6.50026	6.52425	6.49478	6.45836
Copa	8.19837	8.14732	8.19767	8.14396	8.2291	8.17706	8.24256	8.14968
Pex19	6.65527	6.77165	6.70501	6.85772	6.7174	6.76628	6.64632	6.7213
Dcaf8	7.19305	7.17159	7.14163	7.13222	7.13547	7.13032	7.21461	7.13929
Pea15a	9.11973	9.10868	9.03193	9.07723	9.08579	9.09038	8.89959	9.03384
Casq1	2.63124	1.50485	1.44934	1.65887	1.91648	1.77095	1.65536	1.73056
Atp1a4	-1.09355	-0.687836	-0.600384	-0.0458081	-1.55412	-0.888872	0.318056	0.319372
Atp1a2	8.85478	8.46134	8.82938	8.70967	8.67383	8.72175	9.23338	8.77632
Igsf8	6.82385	6.83791	6.80778	6.92911	6.87684	6.86321	6.78036	6.77947
Kcnj9	1.20288	1.42827	1.3306	1.73001	1.3496	0.97286	1.63985	1.24853
Kcnj10	6.70473	6.7493	6.63	6.45872	6.7134	6.67207	6.29263	6.541
Pigm	4.91375	4.7231	4.92454	4.78545	4.89324	4.9144	4.84901	4.86134
Slamf9	1.54879	1.38389	1.16001	1.19612	1.3839	1.18736	1.11973	1.64091
Igsf9	2.08705	1.4195	1.75621	1.87158	1.85666	1.79957	2.01533	1.97025
Tagln2	7.99535	8.00927	8.03345	8.19413	8.11262	8.17071	7.87687	7.959
Cfap45	-2.16556	-0.935206	-1.88248	-2.20891	-2.67534	-2.5506	-1.80316	-1.93024
Slamf8	-0.146682	-2.12331	0.0375417	-0.346784	-0.973718	-1.36009	-0.681714	-1.20503
Dusp23	2.15597	1.99836	1.8882	2.033	2.08235	2.19825	2.25818	2.43011
Fcer1a	-1.27962	-2.12331	-2.27585	-1.81247	-4.34464	-2.14942	-1.4985	-3.06403
Ackr1	6.93699	6.84795	6.87243	6.72751	6.89424	6.93157	6.98259	6.88991
Cadm3	9.52352	9.51215	9.50483	9.50738	9.50034	9.48641	9.49242	9.48977
Aim2	-0.690096	-1.17966	-0.341844	-0.62254	-0.848948	-1.17047	0.517964	-0.867729
Pydc4	-2.04814	-2.75628	-0.0891735	0.0205555	-1.42973	-2.80265	-1.72076	-2.18743
Pyhin1	-0.146682	0.252633	1.08863	1.07644	0.676083	-0.094267	0.483618	0.828786
Pydc3	-0.240208	-0.351422	0.815521	0.724905	-1.76347	-1.41166	-1.19053	-1.02655
AI607873	1.04003	0.817193	2.12069	1.80724	1.58162	1.41164	1.61626	1.65406
Ifi204	0.574588	0.61705	1.7654	1.72006	-0.0915702	0.81355	0.534836	0.951053
Mndal	1.87297	1.38389	2.75358	2.07264	1.49794	1.9805	2.4878	2.04205
Mnda	-1.15295	-1.61116	-0.0244251	0.0205555	-1.76347	-0.346901	-0.721229	-3.06403
Ifi203	2.49276	2.07292	3.13645	2.86488	2.13869	2.34531	2.71944	2.31475
Ifi205	-2.76325	-1.47417	-1.24384	-1.50182	-2.19842	-2.23975	-3.30383	-2.75501
Spta1	-2.04814	0.171422	1.10319	0.0840002	-0.321011	-0.181102	1.69342	0.707859
Fmn2	5.62818	5.59706	5.56132	5.53217	5.56014	5.50057	5.446	5.85196
Grem2	2.62241	2.38804	2.52932	2.38753	2.36165	2.44654	2.3081	2.72629
Rgs7	5.9084	6.06691	6.09288	6.05083	6.10466	6.07189	5.99102	6.05246
Fh1	5.90112	6.06936	5.99036	5.98743	5.89873	5.96694	5.85825	6.02456
Kmo	-0.877766	-1.02808	-1.10346	-1.17035	-0.697782	-1.0029	-0.464967	-2.90126
Opn3	3.71503	3.59668	3.56508	3.35419	3.45697	3.62912	3.60824	3.56787
Chml	5.44	5.30567	5.45037	5.27955	5.26862	5.30478	5.46703	5.51293
Exo1	-1.09355	-1.76253	-0.858043	-0.432976	-1.31522	-1.83588	-1.72076	-0.794429
Pld5	5.75022	5.84019	5.8289	5.89537	5.74059	5.76255	5.86951	5.83546
Cep170	7.02191	6.94162	6.98507	6.94974	6.96801	7.04232	6.99997	6.87103
Sdccag8	4.23285	4.31165	4.30249	3.98299	4.08545	4.27322	4.23251	4.46306
Hmga2-ps1	2.38204	2.79623	2.55073	2.61397	2.61012	2.42465	2.38455	2.47897
Akt3	7.79948	7.80652	7.81767	7.78524	7.77698	7.73536	7.85646	7.88527
Zbtb18	6.13172	6.07844	6.09789	6.04037	6.0995	6.13671	6.08602	6.10189
Adss	6.29724	6.39051	6.35488	6.34313	6.37233	6.38029	6.40012	6.38186
Gm16432	-1.15295	-2.60552	-1.24384	-1.41155	-2.3037	-0.925888	-1.6428	-1.35507
Desi2	4.03912	4.22626	3.95453	3.99748	3.85722	4.02187	3.82607	3.96219
Cox20	3.74178	3.68162	3.76606	3.40476	3.68045	3.77754	3.93494	4.31359
Hnrnpu	7.72565	7.66478	7.71014	7.622	7.64374	7.67667	7.72791	7.74085
Efcab2	3.14123	3.01568	2.94763	2.72262	2.57714	2.80389	3.01229	3.01587
Kif26b	5.42675	5.51868	5.36533	5.42829	5.42868	5.4032	5.36459	5.3406
Smyd3	4.71629	4.69341	4.8681	4.79259	4.68372	4.60461	4.63684	4.78268
Tfb2m	3.80362	3.49813	3.64438	3.59644	3.61155	3.58704	3.72126	3.63409
Cnst	7.93902	7.92545	7.90272	7.88338	7.86425	7.8259	7.78301	7.80352
Sccpdh	6.40799	6.47966	6.26546	6.29702	6.27971	6.18525	6.14592	6.42061
Ahctf1	5.05578	4.95386	5.04916	4.83354	5.10537	5.06762	5.13421	5.04853
Cdc42bpa	7.92809	7.84262	7.90519	7.84512	7.90884	7.90954	7.93214	7.99198
Adck3	5.19032	5.03286	4.99162	5.18324	5.01042	5.05283	5.10344	5.08359
Psen2	5.76283	5.80612	5.82176	5.78158	5.92991	5.80164	5.72401	5.52774
Gm5069	3.35086	3.41016	3.40973	3.367	3.31527	3.35407	3.1691	3.18172
Itpkb	7.42526	7.43753	7.49303	7.47054	7.49166	7.45085	7.3393	7.23622
6330403A02Rik	1.6737	1.85618	1.47196	1.59497	1.58162	1.55957	1.43041	2.04704
Parp1	7.13098	7.15022	7.14822	7.21094	7.20098	7.19236	7.1349	7.07687
Mir6904	2.87745	2.69817	2.80348	2.86939	3.07657	3.05961	2.78437	2.92112
Lin9	1.3492	1.46281	1.48314	1.56193	1.22265	1.5992	2.10844	1.78538
Acbd3	6.17765	6.31513	6.27835	6.255	6.20641	6.20625	6.2524	6.26937
H3f3a	5.82091	5.69837	5.66802	5.69913	5.68921	5.66829	5.72539	5.65464
Sde2	4.02412	3.79101	4.04782	4.01387	4.01468	4.12726	3.99561	4.2694
Pycr2	4.58611	4.73816	4.58263	4.6147	4.6863	4.64697	4.56679	4.59509
Lefty1	0.794905	0.0403341	-0.2281	1.13752	0.0217114	0.102383	1.06271	-0.312813
Tmem63a	4.86312	4.85492	4.81932	4.92409	4.82308	4.75909	4.8616	4.74706
Ephx1	6.65662	6.58973	6.57654	6.64478	6.6797	6.61342	6.73819	6.58437
Nvl	4.66239	4.55219	4.59298	4.60392	4.64711	4.59403	4.62999	4.8189
Cnih4	5.26171	5.34555	5.21338	5.41601	5.20767	5.29022	5.31173	5.14951
Wdr26	6.95271	6.94468	6.931	6.90131	7.01511	6.99746	6.94738	6.91745
Cnih3	1.80436	2.27596	1.95395	2.20695	2.31796	2.1004	1.89635	1.85538
Ccdc121	-2.58907	-3.11528	-2.27585	-2.75737	-2.00845	-2.33611	-2.18988	-4.88315
Lbr	3.92707	3.96676	4.02506	3.77766	4.09324	4.05549	4.25686	3.90006
Enah	8.28947	8.13875	8.3349	8.16566	8.20262	8.24928	8.29542	8.32021
Srp9	5.74362	5.78324	5.65449	5.73848	5.76845	5.70318	5.62802	5.82641
Degs1	7.86035	7.889	7.83481	7.91098	7.91398	7.91143	7.79673	7.76227
1700047M11Rik	-1.49329	-1.41026	-1.10346	-2.99893	-0.627752	-1.46514	-0.891095	-2.50064
Fbxo28	6.17085	6.23714	6.1338	6.1625	6.20011	6.2445	6.10344	6.05989
Trp53bp2	4.34175	4.29377	4.23797	4.25174	4.48271	4.38606	4.17448	4.30736
Capn2	8.56827	8.52351	8.51689	8.52304	8.56356	8.5575	8.4779	8.51622
Capn8	-3.19113	-3.33501	-2.13247	-2.99893	-2.41726	-1.90811	-2.30525	-1.93024
Susd4	6.3076	6.47675	6.37603	6.34677	6.30958	6.32178	6.44153	6.41507
Tlr5	2.09983	2.07292	1.95395	2.10359	2.28203	1.90872	2.45715	2.62972
Disp1	5.09541	4.92937	5.05198	4.98872	5.08791	5.09328	5.02575	5.20194
Brox	6.74622	6.76019	6.73892	6.78083	6.77892	6.75645	6.81444	6.6929
Aida	6.12626	6.16883	6.062	6.04087	6.05827	6.01259	6.07452	6.13715
Mia3	7.14627	7.089	7.17561	7.05986	7.23162	7.23346	7.19832	7.10274
Taf1a	3.99192	4.12206	4.05158	3.86604	3.81227	3.90025	4.10698	4.03689
Hhipl2	-0.116807	0.83048	0.543867	0.114706	0.633941	0.56943	0.723257	-0.0772205
1700056E22Rik	-0.877766	-0.509845	-0.302924	-1.32659	-0.88935	-1.12671	-1.9836	-4.88315
Dusp10	2.30136	1.80325	1.99357	1.88944	2.09276	2.01509	2.40305	2.02696
Hlx	1.98052	1.96862	1.79261	1.97561	1.68154	1.79957	1.9158	1.62095
Marc1	-2.76325	-1.84463	-2.13247	-1.70132	-2.67534	-2.14942	-1.30596	-4.88315
Marc2	5.13319	5.27562	5.20581	5.22166	5.19987	5.17094	5.29511	5.42167
Mir1981	-2.76325	-2.02432	-2.43506	-1.70132	-2.19842	-2.94737	-1.9836	-2.09651
C130074G19Rik	4.92815	5.02204	5.10991	5.01337	4.97218	4.85359	4.91815	5.13081
Mark1	6.48794	6.45547	6.40607	6.35202	6.42965	6.43992	6.45544	6.52565
Rab3gap2	7.03423	7.06531	7.15217	7.11358	7.1455	7.17744	7.14815	7.15369
Iars2	6.6834	6.65676	6.6506	6.72844	6.62361	6.68901	6.69639	6.57576
Bpnt1	6.05751	6.21261	6.08877	6.22979	6.04493	6.13811	6.00849	5.93041
Eprs	7.28369	7.24754	7.28823	7.31954	7.33086	7.36965	7.27297	7.27186
9630028B13Rik	-1.57218	-3.11528	-1.39937	-2.36962	-1.69026	-2.06442	-0.605789	-2.28447
Gm2061	-2.16556	-2.02432	-3.34208	-2.20891	-4.88315	-3.49646	-3.30383	-1.58298
Slc30a10	0.247123	-0.264098	-0.600384	-0.389236	-0.29364	-0.226561	0.318056	-0.287446
Lyplal1	2.93207	3.15686	2.75819	3.02701	2.83757	2.80106	2.31788	2.88253
Tgfb2	3.64918	3.57908	3.61674	3.8202	3.72964	3.60824	3.50714	3.28679
Rrp15	1.70749	2.00423	2.07709	2.033	2.02372	2.0631	2.08572	2.33938
Spata17	-2.58907	-2.46904	-1.88248	-2.20891	-2.82405	-2.43938	-3.08184	-4.88315
Gpatch2	3.94311	3.98173	4.04782	3.95993	4.08805	4.10679	4.14868	4.16301
Esrrg	5.54419	5.5156	5.51442	5.38957	5.32489	5.35193	5.47634	5.69338
Ush2a	-3.80212	-2.92464	-3.05663	-2.06432	-2.98987	-2.67113	-2.43065	-1.78117
Kctd3	5.72673	5.74341	5.77705	5.84762	5.76601	5.72685	5.73956	5.61525
Kcnk2	4.27007	4.14484	4.11582	4.07565	4.05116	4.11479	4.22733	3.93281
Cenpf	-0.604686	0.706245	0.705297	0.144772	0.106339	-0.4782	0.836454	0.940357
Ptpn14	5.28288	4.76868	4.9194	4.71204	4.9855	5.02703	5.18787	5.19014
Smyd2	6.0037	6.02635	5.95166	6.01465	5.98333	5.92241	5.86493	5.80556
Prox1	-3.46452	-3.11528	-4.88315	-4.88315	-2.19842	-3.49646	-1.9836	-4.88315
Rps6kc1	5.8286	5.96592	5.79342	5.89095	5.823	5.79206	5.73682	5.79187
Angel2	4.76223	4.56018	4.68903	4.57523	4.66117	4.6564	4.75044	4.53681
Vash2	2.43342	2.54135	2.57182	2.49063	2.32681	2.82074	2.3081	2.48266
Mfsd7b	5.14865	5.19252	5.23833	5.19766	5.30656	5.33296	5.28705	5.12787
A230020J21Rik	2.70418	3.0755	2.96368	2.99023	2.96768	3.18859	3.0421	2.85716
Spata45	-1.4185	-1.47417	-0.802698	-3.28925	-3.17725	-1.57845	-1.80316	-1.25333
Tatdn3	2.9177	2.72331	2.735	2.65111	2.98734	2.82632	3.12243	3.10717
Nsl1	0.399602	1.18101	1.14602	1.45799	0.917709	1.14337	1.07429	0.982676
Batf3	-0.928763	-0.57843	-1.03808	-0.572763	-2.41726	-1.31029	-2.71981	-0.905824
Atf3	2.57285	3.29746	3.24221	3.03104	3.07395	2.9566	2.75587	2.76621
Nenf	5.03929	5.16722	5.05104	5.1512	5.00905	5.06231	4.95387	5.11187
Tmem206	4.72353	4.75568	4.8477	4.78664	4.87752	4.82949	4.86827	4.79535
Ppp2r5a	4.55048	4.49179	4.58263	4.51176	4.71774	4.64776	4.7755	4.69392
Dtl	-1.83858	-1.07686	-0.2281	-0.62254	-1.37134	-1.46514	-0.27657	-1.58298
Ints7	4.61866	4.80363	4.7654	4.86323	4.75016	4.74223	4.75224	4.85779
Lpgat1	6.92313	6.96685	7.01739	7.01529	6.95112	6.97521	6.99788	6.91762
Nek2	-0.563805	-1.68486	0.0675548	-0.783087	-0.348911	-0.852782	-0.136424	-1.06914
1700034H15Rik	2.00111	1.95655	1.77453	1.79781	2.16852	1.71794	1.99719	1.23109
Slc30a1	4.56898	4.41999	4.52566	4.44234	4.45575	4.4951	4.44042	4.12455
Traf5	0.223963	0.647399	0.626839	0.144772	0.894098	0.444476	0.278534	0.302764
Rcor3	4.97225	4.90445	5.10811	5.08296	4.92198	5.04448	5.15072	4.99978
Gm10516	3.26553	3.53917	3.43009	3.29509	3.42849	3.27676	3.3007	3.55391
Kcnh1	6.15103	6.20562	6.1658	6.13468	6.11011	6.18769	6.08207	6.2731
Hhat	1.95964	1.94438	2.01683	2.16355	2.04532	2.07252	1.57607	1.92756
1700065J18Rik	-1.74421	-1.93168	-1.66947	-1.02939	-1.69026	-1.52069	-1.36733	-1.20503
Sertad4	5.10969	5.07533	5.0576	5.16594	5.11242	4.87594	5.1912	5.25416
Gm15867	-0.877766	-1.12735	-0.802698	-0.346784	-0.697782	-0.450967	-0.761858	-1.3033
Syt14	4.32824	4.44396	4.63993	4.40866	4.46078	4.50643	4.43031	4.64946
Diexf	3.74382	3.74263	3.82215	3.69117	3.77881	3.7411	3.64561	3.72882
Irf6	3.29639	3.53917	3.16102	3.50957	3.5786	3.43841	3.25561	3.44839
A130010J15Rik	2.95686	2.97737	2.80793	2.94822	2.93334	2.86747	2.85996	3.06593
Traf3ip3	1.98742	1.50485	1.31817	1.37164	1.52893	1.5729	1.69342	1.69918
Hsd11b1	0.378782	0.47198	0.9343	0.174224	0.0217114	0.846851	0.954011	0.793561
G0s2	2.89589	2.7792	2.79454	3.12453	2.93912	2.99671	3.03322	2.88811
Lamb3	-1.4185	-1.47417	-1.88248	-3.65309	-1.76347	-1.98415	-2.30525	-1.46453
Camk1g	4.97486	4.85979	4.82811	5.05948	4.97006	4.90455	4.91654	4.78193
Plxna2	7.6059	7.41731	7.41109	7.40974	7.50998	7.51656	7.60573	7.67261
Cd34	5.97017	5.92004	5.87736	5.95651	5.91496	5.88482	5.84182	5.88755
Gm16897	3.37471	3.29746	3.36209	3.44459	3.25631	3.34633	3.128	3.52019
A330023F24Rik	3.7295	3.44297	3.9705	3.30844	3.7772	3.69461	4.16096	4.09109
Mir29b-2	-1.57218	-1.41026	-0.553947	-1.24636	-1.42973	-1.12671	-0.498904	-0.594534
Mir29c	0.574588	0.42019	0.455831	0.0205555	0.820855	0.0461503	1.02738	0.745214
Cd46	-0.780881	-0.687836	0.15402	-0.389236	-0.406385	-0.181102	0.375381	0.490447
Cr1l	4.6385	4.42109	4.44364	4.51895	4.419	4.38228	4.41331	4.35344
Cr2	-1.4185	-0.935206	-0.648365	-1.17035	-0.497132	-0.925888	-0.803664	-0.364928
Ppp1r14c	4.27289	4.26225	3.94041	3.92787	4.17878	4.15523	3.75225	3.78071
Iyd	-0.00313432	0.129036	-0.553947	-0.727563	-1.20913	-0.297554	-0.218868	-0.830613
Plekhg1	5.44188	5.23935	5.32707	5.27105	5.24198	5.24462	5.40185	5.39106
Mthfd1l	4.83664	4.82038	4.91115	4.96469	4.90584	4.90192	4.82005	4.77367
Akap12	10.3765	10.371	10.3645	10.3775	10.3683	10.3882	10.4634	10.4153
Zbtb2	2.79342	2.63141	2.59261	2.46107	2.90999	2.69838	2.92859	2.85716
Rmnd1	3.85352	3.82957	3.80889	3.74614	3.68562	3.82426	3.69148	3.89176
Gm5512	3.85352	3.8246	3.80889	3.75347	3.68218	3.82287	3.69336	3.89314
Armt1	3.91627	3.9486	3.82215	3.89507	3.86635	3.99489	3.71202	3.8848
Ccdc170	-0.828511	-1.68486	-0.697997	-0.963764	-0.930917	-0.322017	-1.03306	-0.262516
Esr1	4.19761	4.23378	3.85909	4.21856	4.23507	4.33319	4.22343	4.25652
Syne1	7.61914	7.43291	7.6763	7.50916	7.63297	7.61458	7.6832	7.78449
Myct1	0.763124	0.437661	0.409713	0.365096	0.605147	0.528969	0.678408	-0.213914
Fbxo5	0.929844	0.58605	0.815521	0.783411	0.545775	0.621671	0.808976	0.33579
Mtrf1l	2.63563	2.66888	2.5347	2.10359	2.65997	2.6009	2.56785	2.41859
Rgs17	5.85711	5.86502	6.04889	5.90693	6.02299	6.04733	5.94285	6.02962
Oprm1	4.2065	4.34559	4.23797	4.29428	4.52176	4.37088	4.0465	3.85805
Ipcef1	0.378782	0.538263	0.565062	0.510736	0.717029	0.385266	0.808976	0.519484
Cnksr3	2.22759	2.01008	2.09177	2.10359	1.92815	2.36843	2.35636	1.88914
Ulbp1	-4.88315	-3.33501	-2.27585	-0.226443	-2.00845	-2.14942	-2.43065	-1.85378
Lrp11	8.14031	8.25986	8.15953	8.2571	8.14603	8.13057	8.16949	8.14445
Pcmt1	7.51982	7.66362	7.57383	7.65191	7.60029	7.60133	7.60323	7.5677
A630066F11Rik	2.21001	1.9135	1.98573	2.51386	2.48136	2.37225	2.313	2.38743
Nup43	1.6907	1.80998	1.94589	1.73989	2.11336	2.08187	1.92223	2.63968
BC020402	1.89513	2.03325	1.85417	2.02494	1.70208	1.9296	1.78794	1.90022
Lats1	5.55988	5.54712	5.58096	5.47267	5.55779	5.61814	5.52359	5.51923
Katna1	3.2165	3.22133	3.16796	3.01892	3.09998	3.14687	3.2038	3.37483
Ginm1	4.10557	3.97426	4.04594	3.75103	4.03641	3.92255	4.06259	4.00516
Ppil4	4.1691	4.17249	4.293	4.27061	4.24794	4.12387	4.09565	4.17561
Zc3h12d	-0.0307239	-0.181759	0.181728	-1.17035	-0.115334	-0.0527341	0.108639	-0.594534
Tab2	6.38697	6.39079	6.31791	6.22144	6.35757	6.30715	6.26193	6.4049
Ust	6.58316	6.56087	6.4101	6.44141	6.48008	6.52425	6.53438	6.58523
Sash1	6.18553	6.0489	5.937	5.86465	5.91935	5.8788	5.94127	6.08924
Samd5	2.33417	2.25147	2.06226	2.00868	2.11846	2.13675	1.73782	2.47527
Stxbp5	6.3824	6.45064	6.38089	6.37162	6.45635	6.47961	6.27391	6.22736
Adgb	2.43342	1.94438	2.42306	1.8983	2.13366	2.30195	2.39383	2.43392
Rab32	2.01466	1.72003	1.54844	1.90709	1.62529	1.71193	1.74508	1.89469
Grm1	-1.93956	-3.59432	-1.4839	-1.81247	-1.69026	-2.5506	-2.30525	-4.88315
Shprh	4.78318	4.58391	4.71296	4.67904	4.70168	4.62315	4.71756	4.89842
Fbxo30	4.57242	4.57407	4.54312	4.41946	4.71858	4.78938	4.40071	4.60782
Epm2a	3.66432	3.69802	3.61166	3.7239	3.6959	3.67465	3.62212	3.47272
Utrn	8.84935	8.73815	8.74309	8.68046	8.82668	8.83139	8.77227	8.90383
B230208H11Rik	-1.03651	-1.93168	-0.192094	-1.17035	-1.01783	-0.424239	-0.605789	-0.563754
Stx11	2.58654	2.0447	2.25064	2.43088	2.43302	2.70747	2.55551	1.87236
Sf3b5	4.99723	5.04715	4.91011	5.13912	4.94514	4.92938	4.82349	4.9972
Plagl1	6.04021	5.99792	6.00012	5.86352	6.12096	6.09141	6.16535	6.13891
Hymai	0.697381	0.3846	0.742982	0.724905	0.820855	1.02228	1.08579	0.88565
Ltv1	4.24152	4.30095	4.2706	4.23262	4.42416	4.28743	4.09138	3.99744
Phactr2	7.49811	7.41827	7.44006	7.3739	7.47447	7.49134	7.45392	7.49041
Fuca2	5.94339	6.0655	5.95015	6.04287	6.02469	5.96883	5.95112	5.95718
Pex3	4.54465	4.6034	4.59427	4.57385	4.4658	4.59892	4.45157	4.41365
Adat2	2.60906	2.58513	2.70667	2.73255	2.74821	2.67385	2.50074	2.92112
Aig1	5.07371	5.13879	5.00332	5.14935	5.0755	4.92873	4.90036	4.99333
Hivep2	6.60769	6.46162	6.60719	6.41428	6.55445	6.55354	6.65382	6.71896
Adgrg6	5.37446	5.13545	5.17426	4.8553	5.31103	5.40133	5.0509	4.82981
Vta1	5.05003	5.22558	5.02928	5.09167	5.14779	5.04747	4.94364	4.92308
Nmbr	-2.76325	-2.92464	-2.00207	-2.5505	-2.67534	-1.57845	-2.43065	-2.75501
Cited2	3.86853	3.73382	3.87402	4.0639	4.09583	3.99613	4.05091	3.48933
Txlnb	0.929844	0.310674	-0.553947	-0.674096	0.186276	-0.0324075	-0.0584384	-0.475168
Heca	4.8309	4.77729	4.62108	4.79259	4.8448	4.74885	4.80796	4.91832
Abracl	2.27906	2.36995	2.36382	2.75709	2.32239	2.60739	2.54721	2.9534
Reps1	5.33987	5.50061	5.4187	5.42905	5.45867	5.44955	5.57293	5.56129
Ect2l	-2.04814	-2.60552	-1.31951	-2.99893	-2.82405	-3.10824	-2.30525	-1.93024
Ccdc28a	5.51586	5.60481	5.46101	5.50707	5.3817	5.34612	5.48124	5.51878
Nhsl1	3.78989	3.69802	4.05907	3.7896	3.9546	4.02914	4.11261	4.2348
Hebp2	5.82042	5.88346	5.79005	5.79704	5.62925	5.70961	5.71894	5.81949
Arfgef3	6.4265	6.4959	6.46961	6.72875	6.53168	6.67825	5.91291	5.99902
Gm4922	-2.43368	-2.12331	-1.77204	-1.41155	-1.92208	-2.5506	-2.43065	-2.90126
4930444F02Rik	-1.34739	-3.59432	-2.13247	-4.14082	-3.17725	-3.28933	-1.89056	-1.25333
Perp	3.28244	3.29746	3.27473	3.26461	3.54109	3.62273	3.59824	3.3325
Tnfaip3	2.80517	2.49204	2.6971	2.51961	2.52429	2.58783	2.57195	2.70433
Gm20139	1.51102	1.36575	1.661	1.45799	1.26008	1.16113	1.5431	1.44294
Olig3	-2.16556	-2.46904	-2.43506	-1.81247	-1.06333	-0.749633	-0.399396	-2.62222
Ifngr1	5.03597	4.88389	5.02642	5.0346	4.87602	4.99149	5.16366	4.98359
Il22ra2	-2.16556	-4.88315	-2.00207	-4.14082	-3.17725	-1.98415	-3.08184	-2.28447
Slc35d3	1.56731	1.57758	1.4379	1.52811	1.36685	1.4042	1.41226	1.07359
Pex7	4.73995	4.76782	4.60965	4.75166	4.69742	4.67351	4.67063	4.65192
Map3k5	5.22354	5.2237	5.22674	5.25391	5.29647	5.20558	5.2594	5.11068
Map7	6.36794	6.43414	6.45088	6.28694	6.33172	6.3648	6.42381	6.55312
Bclaf1	6.34867	6.2123	6.35906	6.26957	6.34919	6.40774	6.44656	6.25082
Mtfr2	-0.646759	-0.765674	-0.600384	-0.783087	-0.848948	-0.450967	-0.605789	-2.90126
Pde7b	4.1991	3.81794	3.91174	3.61804	3.86027	3.91994	4.31296	3.81479
Ahi1	5.52714	5.3911	5.49246	5.42293	5.46118	5.42173	5.45987	5.37228
Myb	0.176496	0.817193	0.9343	0.463804	0.451867	0.962769	1.45721	1.23109
Hbs1l	6.12509	6.10534	6.06433	6.15744	6.11778	6.06689	6.10767	5.97498
4930455C13Rik	3.66647	3.55327	3.64438	3.91047	3.87392	3.76743	3.83461	3.61572
Sgk1	4.97832	4.73198	4.76655	5.08587	5.51635	5.59546	4.85153	4.78865
E030030I06Rik	-1.65563	-3.91068	-2.43506	-3.28925	-1.8406	-1.90811	-2.08306	-2.01098
H60b	0.336217	0.0172795	-0.122671	-0.226443	-0.0451848	-0.534259	-0.431809	-1.46453
Slc2a12	0.746967	-0.236126	-0.553947	0.114706	0.499585	0.487341	1.29831	-0.312813
Tbpl1	5.56507	5.5441	5.51169	5.60697	5.49689	5.51532	5.59471	5.47499
Eya4	0.269918	-0.72623	-0.858043	-0.572763	-0.240408	-0.592585	0.0393893	0.0476349
Rps12	6.82096	6.82863	6.78283	6.79897	6.73495	6.71554	6.77327	6.8258
Snora33	-3.19113	-2.46904	-2.43506	-4.88315	-2.10031	-2.67113	-2.08306	-1.40876
Snord100	-3.46452	-3.33501	-1.5737	-3.28925	-2.41726	-2.33611	-1.03306	-1.85378
Slc18b1	3.68778	3.70164	3.71719	3.65245	3.7196	3.51636	3.55548	3.73811
Vnn1	-0.375161	-2.60552	-0.46533	-0.727563	-0.809645	-0.563127	-0.218868	-0.905824
Stx7	7.32424	7.32307	7.3391	7.39007	7.31636	7.30672	7.25271	7.30259
Moxd1	5.09141	5.30269	5.31852	5.38171	5.29309	5.24774	5.21952	4.99268
Ctgf	3.89627	2.98035	3.743	3.65767	4.52272	4.60299	4.56577	3.28679
Enpp1	4.66776	4.54515	4.58782	4.43018	4.56725	4.67196	4.58006	4.54566
Enpp3	-0.240208	0.107367	0.15402	-0.0122448	0.126742	0.259017	0.584298	0.669512
Med23	4.72662	4.66773	4.54045	4.45739	4.70677	4.58336	4.80709	4.60613
Arg1	-2.04814	-1.41026	-2.00207	-1.32659	-1.92208	-1.70143	-1.80316	-1.46453
Akap7	3.70879	3.73382	3.68851	3.62871	3.60792	3.60662	3.89139	4.22271
Epb4.1l2	7.15682	6.82386	6.78791	6.83744	6.90959	6.92736	6.79466	7.04415
Tmem200a	5.38885	5.55164	5.47227	5.58452	5.39858	5.50144	5.58208	5.37526
Gm9767	2.93563	3.13828	3.01848	2.96938	3.03129	3.00165	3.10841	2.74485
L3mbtl3	2.95686	2.67257	3.06386	2.91808	2.97332	2.96421	3.03322	2.99793
Arhgap18	2.80126	2.67625	2.52932	2.24214	2.4124	2.43198	2.84651	3.00821
Lama2	6.19785	5.73901	5.95518	5.78516	5.7906	5.82933	5.73317	5.82532
Ptprk	4.11505	4.18289	4.18762	4.24135	4.11638	4.08835	4.35037	4.25437
Themis	-2.43368	-2.46904	-2.13247	-1.24636	-1.92208	-2.23975	-1.36733	-3.24753
2310057J18Rik	-2.58907	-3.33501	-2.81843	-4.88315	-3.39265	-4.39392	-1.72076	-1.1583
Soga3	7.82652	7.8895	7.96159	7.99809	7.95459	7.97979	7.68804	7.70398
9330159F19Rik	6.26781	6.1603	6.38611	6.11441	6.36805	6.34843	6.17716	6.27603
Echdc1	5.70494	5.6911	5.60482	5.64625	5.69904	5.71187	5.68722	5.63238
Rnf146	6.2518	6.34841	6.17056	6.25155	6.27657	6.32326	6.27171	6.23121
Rspo3	-0.177189	-0.41272	-0.2281	0.643011	0.605147	0.647098	1.07429	0.144014
Cenpw	0.176496	0.3846	0.455831	0.0840002	0.0217114	0.174105	-0.30631	-0.985172
Trmt11	2.54976	2.31901	2.28936	2.54237	2.58821	2.41728	2.46598	2.70433
Gm20300	6.23886	6.29968	6.33034	6.19833	6.25964	6.30541	6.23411	6.26884
Hint3	4.21093	4.19835	4.22804	4.26891	4.04313	4.31447	4.16773	4.13748
Ncoa7	8.03446	8.11459	8.03452	8.07159	8.0588	8.07698	7.97623	7.92862
Hey2	5.45996	5.56462	5.46242	5.41138	5.28743	5.33687	5.26573	5.35829
Hddc2	3.56414	3.47716	3.61927	3.74122	3.52772	3.58376	3.32272	3.60898
Tpd52l1	2.59559	2.50453	2.25717	2.53671	2.34433	2.18095	2.34205	2.9184
Rnf217	4.11347	4.04863	3.84616	3.93218	3.95031	3.84501	3.7341	3.61235
Nkain2	4.91826	5.0126	4.82702	4.84847	4.99802	5.084	4.84055	4.919
Trdn	0.336217	-1.02808	-2.27585	-1.02939	-1.20913	-1.63863	-0.643252	-4.88315
Clvs2	3.21062	3.19588	3.45016	3.01486	3.37832	3.30699	3.52414	3.00821
Rsph4a	-0.177189	-0.935206	-0.0564361	0.415294	0.333976	-0.0324075	-0.0584384	-0.0134425
Zufsp	2.64438	2.90699	2.5347	2.59232	2.56597	2.65203	2.62806	2.87693
A830082N09Rik	4.06542	3.61023	4.01931	3.93433	3.74292	3.88564	4.1098	4.10911
Rwdd1	4.85466	4.9193	4.92248	4.98664	4.94873	4.95123	4.81919	4.84351
Trappc3l	6.45413	6.28558	6.32569	6.26829	6.3193	6.41308	6.46593	6.54255
Fam26d	2.07415	2.14382	1.87977	2.31667	2.21691	2.45376	2.24798	2.68203
Fam26e	3.02545	3.04162	2.99915	2.99023	3.11282	2.92577	2.82951	2.70116
Fam26f	-1.2149	-3.91068	-1.24384	-1.93291	-2.54054	-1.90811	-2.08306	-1.52254
Dse	4.36311	4.1288	4.24784	4.1918	4.32611	4.33319	4.43706	4.38633
Tspyl1	7.57949	7.67517	7.58084	7.6943	7.63498	7.54241	7.52978	7.56998
Tspyl4	8.93045	8.98987	8.9553	9.03333	8.9738	9.00584	8.90907	8.97069
Nt5dc1	2.08062	1.98059	2.03973	2.24908	2.00731	2.00529	2.36582	1.26577
Col10a1	-0.485364	-1.47417	-0.46533	-0.080171	-0.930917	-0.817573	-0.569274	0.0476349
Frk	-1.03651	-1.23395	-0.697997	-1.09815	-0.528695	-1.12671	-0.891095	-2.75501
Hs3st5	4.60864	4.63781	4.6122	4.76624	4.62934	4.68583	4.58817	4.64782
Hdac2	6.53428	6.58067	6.54755	6.62492	6.55751	6.56484	6.47251	6.49902
Marcks	7.27561	7.15881	6.95428	6.95267	6.95416	6.93963	6.91049	7.01163
Lama4	6.1735	5.79558	5.88	5.69342	5.71302	5.71111	5.88152	5.71354
Fam229b	2.36626	2.13314	2.55073	2.22817	1.99071	2.51028	2.22738	2.22064
Tube1	1.90972	1.80998	1.92964	1.8166	1.63244	1.97549	1.83637	1.9755
Wisp3	-0.828511	-1.02808	-0.802698	-1.24636	-1.11031	-1.52069	-0.605789	-3.06403
Fyn	6.70995	6.63374	6.60911	6.62425	6.65577	6.59965	6.5552	6.51713
Traf3ip2	3.80362	3.75662	3.76377	3.61804	3.85722	3.57385	3.70458	4.01157
E130307A14Rik	2.80126	2.74101	2.6729	2.54801	2.78076	2.52749	2.93178	2.92926
Rev3l	5.15937	4.97794	5.1464	4.889	5.09311	5.11452	5.06983	5.11246
AA474331	0.841301	0.856693	0.646857	0.339327	0.662172	0.890088	0.966501	0.547948
G630090E17Rik	-2.43368	-3.59432	-1.66947	-2.20891	-3.17725	-1.90811	-1.43142	-3.70407
BC021785	-3.19113	-3.11528	-1.66947	-2.06432	-2.98987	-3.10824	-2.71981	-3.70407
AI317395	0.269918	0.0172795	0.815521	-0.346784	-0.0225397	0.515226	0.393993	-0.563754
Slc16a10	1.23799	1.89464	1.59039	1.97561	1.70208	1.6314	2.23256	1.90022
Rpf2	3.89993	3.87996	4.00581	4.09117	3.8934	4.04237	3.8963	3.93819
Gtf3c6	3.85541	3.80454	3.72898	3.70385	3.81855	3.74993	3.54927	3.74428
Amd1	5.47965	5.65655	5.59133	5.57627	5.50616	5.55867	5.57088	5.53975
Amd2	5.47965	5.65655	5.59133	5.57627	5.50616	5.55867	5.57088	5.53975
Cdk19	5.40953	5.40059	5.42379	5.32046	5.3177	5.39055	5.50391	5.49065
Ddo	-0.780881	-0.351422	-0.341844	-0.62254	-0.16407	-0.372222	-0.136424	-0.504096
Mettl24	-0.780881	-0.181759	-0.697997	-0.0122448	-0.593971	-0.783203	-0.569274	-2.38851
Cdc40	4.16454	4.23378	4.01546	4.16088	4.12782	4.25058	4.14044	4.06793
Wasf1	6.02731	6.00783	6.01945	6.05924	6.06391	6.00062	5.97256	5.87215
Fig4	6.31447	6.2934	6.29985	6.25241	6.32538	6.34382	6.25463	6.21299
Zbtb24	3.73974	3.25374	3.50876	3.29174	3.43054	3.51809	3.71017	3.43702
Mical1	6.62768	6.58263	6.73367	6.85517	6.70981	6.69492	6.85468	6.79366
Smpd2	3.21943	3.12216	3.35602	3.3574	3.27242	3.32876	3.26575	3.20425
Ppil6	-0.410968	-0.935206	-0.422983	-0.080171	-0.848948	0.0838813	0.600415	0.745214
Cd164	8.35822	8.2885	8.26792	8.38865	8.29475	8.34852	8.32444	8.35422
Ccdc162	0.499423	1.00469	0.815521	0.621791	0.845685	1.08874	0.678408	1.11222
Cep57l1	1.93846	2.19094	1.83685	1.86256	2.10824	1.84972	1.84316	2.14812
Sesn1	5.63807	5.65001	5.56198	5.5742	5.84164	5.80941	5.52729	5.70725
Armc2	1.90244	1.8883	1.93779	1.94176	1.69527	1.9192	1.98496	1.42003
Foxo3	5.63643	5.79515	5.6796	5.75075	5.78419	5.67989	5.7171	5.55561
Lace1	3.50051	3.71782	3.67882	3.58552	3.60429	3.53351	3.59423	3.54158
Snx3	7.16577	7.20736	7.10772	7.1247	7.09398	7.1076	7.03319	7.07672
Ostm1	5.96144	6.06164	5.97362	5.9618	5.92081	6.1101	5.93493	5.97137
Sec63	6.53487	6.45654	6.52677	6.49928	6.45761	6.50742	6.46042	6.467
Scml4	3.31295	3.40351	3.18517	3.18727	3.20446	3.37514	2.93813	3.31605
Sobp	5.52832	5.56413	5.59584	5.47267	5.58062	5.69787	5.58614	5.58037
9030612E09Rik	-0.0588514	0.505502	-0.0244251	0.839637	-0.0225397	0.621671	-0.109958	0.352023
Pdss2	3.27964	3.37432	3.4272	3.4294	3.23767	3.26038	3.29328	3.37085
Bend3	3.80557	3.50229	3.77063	3.60998	3.61516	3.42744	3.44155	3.30775
1700021F05Rik	3.97294	3.88475	3.79325	3.94719	3.88594	3.86411	3.97412	3.76867
Cd24a	9.69432	9.90709	9.82112	9.87245	9.82368	9.83836	9.77521	9.65429
F830002L21Rik	-1.83858	-1.93168	-1.5737	-1.09815	-2.00845	-3.49646	-2.568	-0.724674
Qrsl1	4.21534	4.38215	4.35059	4.25691	4.34038	4.36897	4.28581	4.46959
Rtn4ip1	4.89187	5.03429	4.98377	5.01846	4.92563	5.08807	5.00396	4.87404
Aim1	2.29025	1.77604	2.44036	2.65633	2.22639	2.40615	2.13081	2.00146
Atg5	5.45189	5.45576	5.36835	5.34495	5.43636	5.32215	5.29388	5.44834
Prdm1	-0.780881	0.171422	0.0675548	-1.02939	0.316319	-0.397996	-0.109958	-1.25333
Prep	6.36	6.34408	6.35184	6.26615	6.27057	6.27285	6.26888	6.25972
Popdc3	4.71525	4.82785	4.67569	4.74309	4.60046	4.8057	4.65624	4.76005
Bves	4.5282	4.52486	4.25275	4.46783	4.38764	4.39547	4.44378	4.7699
Lin28b	2.31786	1.98653	2.29571	1.97561	1.99626	2.23225	2.5093	2.80505
Hace1	5.13939	5.25852	5.04445	5.02857	5.15898	5.21623	5.13905	5.15588
D030045P18Rik	-1.34739	-1.84463	-1.39937	-1.70132	-0.848948	-3.49646	-1.6428	-2.75501
C130030K03Rik	0.592783	0.3846	0.8331	0.144772	0.333976	0.582668	0.966501	1.5168
Grik2	3.72744	3.78078	3.81774	3.48334	4.00782	3.81868	3.58616	4.08382
Ascc3	4.51514	4.53909	4.68661	4.69437	4.63024	4.71167	4.57599	4.62963
Lilr4b	-0.877766	-1.76253	-0.265027	-1.02939	-0.662342	-0.653368	0.708461	-0.23801
Lilrb4a	0.90093	0.437661	0.884587	-0.115372	0.703509	0.659646	1.5679	1.17744
Vgll2	0.0505108	-0.613985	-0.341844	-0.226443	0.224642	-0.346901	-0.464967	0.475706
Dcbld1	4.75214	4.81704	4.884	4.99079	4.93867	4.89397	4.82435	4.77517
Gopc	6.14295	6.03892	6.20894	6.19115	6.12635	6.22985	6.04575	6.09799
Nus1	6.50155	6.5651	6.51797	6.51843	6.5312	6.60371	6.45821	6.55772
Slc35f1	5.92645	5.9378	5.76279	5.77978	5.78339	5.7745	5.91009	5.9358
Cep85l	3.52203	3.40794	3.47557	3.19807	3.30636	3.2788	3.32515	3.26552
Gm19395	-2.96139	-4.88315	-3.05663	-2.20891	-3.39265	-2.67113	-2.30525	-1.71204
Pln	2.18624	1.95048	1.85417	2.19263	1.52893	1.74763	1.69342	2.53692
Gm20597	1.43237	0.992922	1.16001	0.945914	1.53658	0.708773	1.29831	1.28281
Mcm9	2.52154	2.56141	2.76278	2.87388	2.55848	3.05249	2.6398	2.86
Asf1a	3.57104	3.66503	3.6142	3.54382	3.43464	3.605	3.66682	3.58857
Fam184a	3.97987	3.96224	3.8719	4.02199	4.05116	3.91994	3.98337	4.22712
Man1a	3.22528	3.10039	3.10061	3.06289	3.25631	3.37894	2.9413	2.97452
Gm16998	-2.96139	-3.11528	-2.81843	-0.62254	-3.95341	-1.76709	-3.30383	-1.93024
Tbc1d32	4.49351	4.22877	4.36123	4.31261	4.32501	4.34198	4.4549	4.69631
Msl3l2	3.1474	3.28303	3.41849	3.40165	3.40988	3.39592	3.10276	3.17945
Gja1	5.13707	5.14213	4.80603	4.85644	4.8925	4.90719	4.88152	4.82545
4930467K11Rik	-3.46452	-3.11528	-3.05663	-2.99893	-2.10031	-2.23975	-3.5663	-4.37579
Hsf2	4.52702	4.8011	4.78473	4.65443	4.70338	4.86785	4.62999	4.64618
Serinc1	9.74937	9.69539	9.66459	9.70307	9.71362	9.75201	9.66302	9.74834
Pkib	4.46787	4.60436	4.47197	4.45739	4.8624	4.80146	4.40301	4.69313
Fabp7	7.20825	7.45707	6.50671	6.37954	5.9483	6.03323	5.97527	7.08555
Smpdl3a	5.30305	5.31456	5.27497	5.34899	5.29534	5.35868	5.22732	5.3608
Gcc2	6.20378	6.13676	6.21649	6.04735	6.15829	6.15011	6.18252	6.17557
Lims1	6.61911	6.73171	6.7563	6.68977	6.78274	6.75097	6.72538	6.68251
Ranbp2	7.06246	6.90558	6.98212	6.98964	6.98225	7.04606	6.99845	6.99589
Ccdc138	2.18024	1.9135	2.03973	2.15619	2.056	2.08653	2.3516	2.35558
Edar	-1.83858	-3.33501	-1.4839	-1.81247	-3.17725	-1.70143	-0.936882	-1.20503
Sh3rf3	2.22759	2.07292	2.25064	2.0882	2.06131	2.22805	2.29331	1.9597
Sept10	3.45399	3.38111	3.1954	3.41096	3.3868	3.23963	2.98493	3.45404
Sowahc	4.60304	4.65938	4.62865	4.50742	4.75917	4.75909	4.46264	4.54478
P4ha1	5.6955	5.55665	5.58615	5.47932	5.60764	5.56577	5.33299	5.3477
Pla2g12b	-2.58907	-1.12735	-1.88248	-1.59813	-2.82405	-2.33611	-1.36733	-1.64607
Oit3	-1.83858	-1.47417	-1.03808	-1.81247	-1.55412	-1.76709	-1.9836	-2.50064
Mcu	5.58111	5.72129	5.63583	5.72859	5.64481	5.65425	5.6422	5.62655
Micu1	6.96673	7.0732	6.91793	7.09734	6.97136	6.97881	6.9383	6.9251
Dnajb12	5.45002	5.64155	5.44966	5.48079	5.46118	5.47462	5.36105	5.57864
Ddit4	6.0899	6.158	5.93344	6.14448	6.39722	6.43034	5.69662	5.92838
Anapc16	5.38298	5.44338	5.26529	5.3303	5.49001	5.39008	5.24857	5.3633
Ascc1	4.56091	4.38777	4.42347	4.25691	4.39081	4.40482	4.46153	4.19261
Spock2	10.9514	10.9769	10.9523	10.9993	10.9552	10.9255	10.9904	10.9571
Mir6906	0.537495	0.3846	0.362072	0.439753	0.467949	0.608787	0.466133	-0.121361
Chst3	3.70043	3.96826	3.69092	3.66028	3.90378	3.78185	3.46155	3.72259
Psap	10.6666	10.6639	10.6368	10.6926	10.6803	10.6408	10.6793	10.7025
Cdh23	-0.690096	-1.41026	-0.508958	-1.50182	-1.20913	-0.622657	-0.681714	-1.06914
4632428N05Rik	2.94629	2.95934	3.22567	3.14699	3.26554	3.05487	3.58413	3.36286
Slc29a3	5.23879	5.20341	5.13759	5.18957	5.24607	5.24097	4.97643	5.08116
Unc5b	4.33636	4.20091	4.07578	4.00979	4.18122	4.34683	4.41559	4.02808
Pcbd1	4.58724	4.63024	4.51617	4.71956	4.62397	4.4686	4.5199	4.50087
Sgpl1	5.68335	5.84019	5.74838	5.88817	5.87368	5.91031	5.8346	5.72371
Adamts14	1.83526	1.59325	1.47196	1.33299	1.46627	1.68149	1.95394	2.12469
Pald1	3.98677	3.97725	4.01161	3.97465	4.02287	4.05668	4.03765	4.11744
Eif4ebp2	4.2444	4.20219	4.23467	4.11035	4.19578	4.28237	4.19718	4.19598
Lrrc20	5.05988	5.15934	4.99358	5.0466	5.09699	4.98216	5.14936	5.30038
Npffr1	-0.928763	-1.68486	-1.5737	-1.93291	-1.8406	-1.41166	-1.30596	-4.88315
Ppa1	6.19785	6.31867	6.26141	6.25758	6.2118	6.32499	6.12762	6.31563
Sar1a	6.89179	6.90323	6.8703	6.88942	6.88977	6.89158	6.86076	6.88991
Tysnd1	4.74403	4.91696	4.91218	4.96469	4.84864	4.89927	4.74863	4.84063
Aifm2	3.234	3.14361	2.9314	2.95248	3.26093	3.11988	3.0213	2.98497
H2afy2	4.08644	4.10985	4.03458	4.11984	4.14167	4.04237	4.00321	4.28956
Col13a1	1.21468	0.601633	0.235595	-0.0458081	0.402517	0.444476	0.131003	0.144014
2010107G23Rik	4.21827	4.24499	4.35059	4.40711	4.32831	4.32337	4.33239	4.2694
Neurog3	-0.0588514	0.0172795	0.585949	0.463804	0.633941	0.400298	0.795039	-0.190213
Tspan15	5.90067	6.00526	5.88948	5.90309	5.91422	5.9514	5.7975	5.94853
Mir7662	-2.76325	-3.33501	-2.13247	-2.36962	-2.00845	-2.33611	-2.08306	-3.06403
Tacr2	-1.49329	-1.41026	-1.77204	-1.41155	-1.15887	-1.36009	-0.681714	-4.88315
Hk1	8.80688	8.78647	8.83722	8.8816	8.92989	8.89239	8.81676	8.81293
Hk1os	-1.74421	-0.687836	-0.802698	-0.572763	-0.809645	-0.4782	-0.109958	-0.905824
Hkdc1	-2.43368	-1.47417	-2.61405	-3.65309	-1.55412	-1.76709	-1.72076	-1.02655
Supv3l1	4.41771	4.53808	4.40596	4.60797	4.37597	4.48632	4.27329	4.49174
4930507D05Rik	1.46237	1.70568	1.4607	1.71004	1.60362	1.96541	1.37527	2.20731
Vps26a	5.85381	5.82699	5.85441	5.92112	5.72812	5.80058	5.849	5.83365
Srgn	3.60056	3.37885	3.57295	3.58826	3.65434	3.61147	3.84141	3.7179
Kif1bp	6.91072	6.94296	6.89091	6.9068	6.89573	6.91711	6.82477	6.84814
Ddx21	4.8048	4.90131	4.82921	4.99389	4.93506	4.99025	4.9826	4.74322
Ddx50	5.62099	5.58289	5.63708	5.62308	5.60446	5.63889	5.64268	5.6632
Stox1	-0.780881	-0.613985	-0.749398	-0.346784	-1.8406	-0.0123634	-0.569274	-1.52254
Ccar1	5.52418	5.58779	5.52797	5.39896	5.54884	5.47772	5.56422	5.63901
Tet1	3.48841	3.02727	3.28435	2.94396	3.25399	3.28083	3.23511	3.34269
Slc25a16	5.45002	5.50631	5.46313	5.53075	5.53125	5.5641	5.48233	5.52908
Dna2	0.200425	0.0403341	0.966514	0.144772	1.00847	0.97286	1.53474	0.33579
Rufy2	6.73883	6.72283	6.73454	6.72626	6.69644	6.65866	6.76592	6.7821
Hnrnph3	4.53997	4.51152	4.47757	4.39152	4.41693	4.30051	4.56577	4.60359
Pbld2	2.3768	2.23657	2.30204	2.24908	2.28203	2.2448	2.3081	2.17117
Pbld1	-2.43368	-3.33501	-2.00207	-1.93291	-2.67534	-2.43938	-2.8895	-4.88315
Mypn	0.480004	0.42019	0.261793	-0.115372	0.619616	0.225649	0.902942	0.302764
Herc4	4.60864	4.52486	4.64989	4.54455	4.6041	4.76491	4.6132	4.67872
Sirt1	3.75799	3.67058	3.79101	3.41405	3.82481	3.79328	3.87823	3.85805
Dnajc12	3.46391	3.39905	3.68851	3.7632	3.52196	3.64341	3.48126	3.63077
Ctnna3	2.85878	2.3048	2.32707	2.24214	2.37024	2.84017	2.47475	2.14812
Lrrtm3	2.91409	3.42775	2.9314	3.1691	3.02315	3.0714	2.90931	2.82263
Gm31763	-1.4185	-2.46904	-1.5737	-2.99893	-1.76347	-0.925888	-0.891095	-1.35507
Reep3	5.8772	5.73372	5.66863	5.66777	5.73479	5.73094	5.7808	5.6419
Jmjd1c	5.89518	5.5956	5.70548	5.46599	5.70117	5.56034	5.81617	5.74192
Nrbf2	4.62862	4.81119	4.50387	4.62674	4.62128	4.62074	4.42467	4.38238
Egr2	4.7225	3.68893	4.06652	3.98091	4.0391	4.13515	4.38916	4.58225
Ado	5.90158	5.7346	5.70608	5.72486	5.63371	5.71337	5.77549	5.76484
Zfp365	6.84179	6.77766	6.75544	6.75792	6.80705	6.6821	6.6999	6.6097
Rtkn2	-0.340221	-0.129366	0.12577	0.0840002	0.205586	0.156506	-0.643252	0.319372
Arid5b	4.18117	3.90216	3.92204	3.80145	4.101	4.08835	4.11401	3.79265
1700040L02Rik	-3.46452	-1.23395	-2.43506	-3.65309	-1.76347	-1.76709	-1.56885	-0.475168
Tmem26	-1.2149	-0.650438	-1.5737	-2.20891	-0.930917	-1.0029	-1.56885	-1.35507
Rhobtb1	2.56826	2.17541	2.13493	2.31667	2.48531	2.43198	2.91254	2.76923
Cdk1	-0.690096	0.310674	-0.122671	0.390414	0.186276	0.00740604	0.822781	0.575861
Ank3	8.18015	8.02335	8.21568	8.08752	8.20667	8.23113	8.24272	8.27629
Ccdc6	6.36761	6.31572	6.39353	6.37637	6.43324	6.47274	6.37253	6.37418
Mrln	-3.80212	-2.12331	-2.27585	-2.99893	-2.54054	-3.49646	-2.71981	-4.88315
Slc16a9	4.27571	4.07259	4.06093	3.85472	4.28925	4.30051	4.39032	4.18016
Fam13c	4.7225	4.75132	4.7768	4.6816	4.78267	4.87123	4.8549	4.70897
Phyhipl	6.89133	6.95135	6.83229	6.88359	6.9344	6.86372	6.82755	6.92272
Bicc1	3.6729	3.27334	3.34074	3.41713	3.44483	3.46367	3.67825	3.28679
Tfam	4.31597	4.33514	4.35971	4.45289	4.336	4.33025	4.32635	4.27898
Ube2d1	5.80734	5.85652	5.82616	5.83038	5.83274	5.88148	5.85657	5.85766
Cisd1	6.59138	6.73326	6.63	6.76519	6.56126	6.59802	6.56806	6.52139
Ipmk	5.30581	5.24989	5.33094	5.2787	5.19021	5.25603	5.18653	5.1553
Zwint	9.39746	9.47475	9.47317	9.51912	9.44682	9.46484	9.42133	9.45556
Pcdh15	1.06632	1.34738	1.36726	0.928736	1.27843	1.02228	1.41226	0.851801
Gnaz	6.07014	6.15305	5.9972	6.08321	6.07543	6.09257	6.01	5.9717
Rab36	4.26156	4.22626	4.2046	4.04609	4.35558	4.27117	4.32877	4.07529
Bcr	7.19249	7.17924	7.15457	7.22067	7.23618	7.19195	7.26888	7.09883
Specc1l	7.17429	7.18555	7.16285	7.1571	7.13043	7.16855	7.15584	7.12046
Adora2a	2.78948	2.61615	2.82121	2.84212	2.42068	2.51374	2.34683	2.71692
Gm5779	-1.83858	-3.91068	-2.43506	-1.93291	-1.76347	-2.5506	-3.08184	-4.88315
Upb1	1.02671	1.0845	0.815521	0.802398	1.13472	1.05114	1.31794	1.09303
Gucd1	5.23662	5.35707	5.22007	5.23307	5.20348	5.28213	5.20246	4.98294
Snrpd3	4.93173	4.93937	4.93169	5.00007	4.82464	4.76853	4.68108	4.69631
Lrrc75b	7.54632	7.59094	7.55045	7.55711	7.57881	7.61468	7.48382	7.59567
Ggt1	-0.877766	-0.980896	-1.4839	-1.50182	-1.01783	-0.653368	-0.431809	-1.78117
Ggt5	3.09411	3.0755	2.85171	2.64586	2.8952	2.85933	2.81232	3.13558
Susd2	9.27898	9.22558	9.2264	9.27167	9.27223	9.22625	9.24232	9.19895
Cabin1	6.2141	6.09092	6.23562	6.16983	6.15177	6.20438	6.2673	6.20799
Ddt	5.28428	5.27015	5.17942	5.28631	5.18292	5.2745	5.07128	5.13551
Gstt3	1.70749	1.78289	2.09905	2.28327	1.7489	2.02966	2.57195	2.47897
Gstt1	3.4981	3.35376	3.53854	3.55226	3.53919	3.58704	3.68015	3.71162
Gstt2	2.06766	1.76224	2.13493	2.00868	1.91061	2.22805	2.50074	1.76734
Mif	6.79024	6.88563	6.72781	6.79956	6.80388	6.82403	6.66966	6.65211
Derl3	-1.93956	-2.12331	-0.648365	-1.32659	-1.42973	-0.592585	-1.4985	-0.287446
Smarcb1	5.60091	5.65282	5.55338	5.68193	5.62163	5.57325	5.62506	5.68539
Mmp11	2.16208	1.59325	1.64117	1.48175	1.54418	1.38166	1.75231	2.04205
Chchd10	6.58486	6.71703	6.4888	6.62024	6.52641	6.48601	6.50043	6.52677
Gm867	1.79653	1.78971	1.65112	1.82591	2.1031	1.69983	2.05681	1.60071
Vpreb3	-1.65563	-1.17966	-1.39937	-1.41155	-2.10031	-2.67113	-1.43142	-0.985172
Zfp280b	4.32416	4.33863	4.41912	4.08924	4.24794	4.26092	4.0785	4.17788
Slc5a4a	-3.46452	-2.22961	-4.88315	-4.14082	-2.98987	-2.23975	-1.80316	-4.88315
Prmt2	6.45351	6.64342	6.45194	6.53448	6.48404	6.48997	6.39204	6.53034
Mir678	3.257	3.14893	3.06386	3.35419	3.22116	3.22282	3.08282	3.32018
S100b	8.98469	8.99135	8.90833	8.97941	8.90777	8.96373	8.8086	9.03148
Dip2a	6.11254	6.1685	6.05124	6.17849	6.0649	6.1101	6.1748	6.19848
Pcnt	4.80382	4.69159	4.86169	4.75044	4.77703	4.76273	4.87657	4.85209
1700094J05Rik	1.49176	1.2617	1.48314	1.12249	1.6607	1.4264	1.80194	1.19554
2610028H24Rik	-1.57218	-0.72623	-0.802698	-1.70132	-1.49059	-0.2735	-1.13611	0.475706
Ybey	2.11879	2.41915	2.33942	2.26285	1.88088	2.38741	2.14186	2.22505
Mcm3ap	5.58225	5.4309	5.59133	5.48814	5.52406	5.57987	5.58664	5.59493
Lss	6.26072	6.30416	6.12758	6.2126	6.23401	6.22748	6.04649	6.48505
4930483K19Rik	2.82454	2.79961	2.71143	2.6719	2.93044	2.98679	2.8799	2.98497
Col6a2	6.24678	5.53043	5.75012	5.81293	5.7914	5.69406	5.95348	5.66117
Col6a1	6.18778	5.4205	5.63958	5.73169	5.80254	5.79916	5.87366	5.6386
Pcbp3	8.40836	8.49706	8.48614	8.54813	8.49164	8.49963	8.46627	8.41772
Slc19a1	5.15632	5.21865	5.18713	5.34252	5.2196	5.13544	5.1349	5.0566
Col18a1	5.37315	5.1783	5.35015	5.17689	5.46118	5.37589	5.29635	5.1553
Gm10941	-1.57218	-0.613985	-2.81843	-2.99893	-2.00845	-1.31029	-1.36733	-2.09651
Pofut2	5.04344	4.79349	4.8945	4.78187	4.77299	4.77287	4.77283	4.66335
Adarb1	6.35	6.36163	6.3419	6.29744	6.23283	6.22458	6.32876	6.25298
Gm17769	-3.19113	-1.29036	-1.39937	-1.70132	-1.20913	-0.963879	-1.30596	-0.724674
Fam207a	5.21696	5.10707	5.08629	5.15951	5.22906	5.15994	5.15687	5.21587
Itgb2	2.2334	2.32841	2.49107	2.32326	2.76783	2.45015	3.13631	2.0219
Pttg1ip	6.67114	6.49903	6.53115	6.63223	6.58496	6.61483	6.48342	6.49514
Sumo3	6.28994	6.47702	6.4337	6.49637	6.45534	6.40075	6.42069	6.46979
Ube2g2	5.3506	5.37078	5.40848	5.39896	5.31714	5.38536	5.34858	5.38121
Tspear	-0.0588514	0.554368	0.15402	0.259136	0.298444	-0.0123634	-0.0086955	-1.20503
Lrrc3	4.78218	4.81537	4.83576	4.96258	4.96369	4.86311	4.75944	4.78193
Trpm2	5.27374	5.27502	5.37136	5.34818	5.23847	5.29274	5.3372	5.2692
1810043G02Rik	4.90103	4.99722	4.91115	5.1696	5.01863	4.94676	4.94916	5.01133
Pfkl	6.31994	6.48413	6.44553	6.56711	6.44065	6.44718	6.38159	6.36795
Icosl	1.85046	1.90724	1.91321	1.95029	2.22639	2.11414	2.13634	2.44153
D10Jhu81e	6.06119	6.2265	6.07036	6.20637	6.09336	6.1061	6.06729	6.085
Pwp2	4.5528	4.71864	4.62739	4.66743	4.59131	4.70714	4.73774	4.55971
Trappc10	7.04398	7.06777	7.04758	7.06675	7.08276	7.06181	7.0317	7.14716
Agpat3	7.75346	7.66732	7.67188	7.68218	7.68054	7.67174	7.66895	7.7149
Rrp1	7.50968	7.50654	7.48541	7.56112	7.54617	7.46701	7.43901	7.42033
Mir6907	-2.04814	-1.29036	-1.31951	-1.32659	-2.19842	-2.06442	-2.08306	-2.28447
Cstb	4.50916	4.81203	4.66592	4.62807	4.5304	4.57096	4.45046	4.53593
Pdxk	5.50929	5.50009	5.40334	5.48521	5.46619	5.46437	5.6127	5.4322
Ilvbl	4.81646	4.76696	4.82592	4.87112	4.70847	4.86582	4.71479	4.81744
Syde1	4.52346	4.53403	4.59685	4.44988	4.45474	4.52112	4.60024	4.64618
Ccdc105	-0.646759	-0.444374	-0.600384	-0.674096	-0.734114	-0.653368	-0.643252	-0.905824
Slc1a6	2.77362	3.10313	2.88158	2.87836	2.93334	2.88894	2.96639	2.50823
2610008E11Rik	4.17967	3.97725	4.15304	3.96204	3.99955	4.09414	4.1112	3.9701
Ppap2c	4.03746	4.01411	3.9241	3.97046	4.01057	3.84501	3.71573	3.73811
Mier2	4.6064	4.53808	4.57481	4.44385	4.55601	4.4695	4.5357	4.57708
C2cd4c	3.91447	3.70525	3.95051	3.90828	3.80279	3.96613	3.9803	4.19148
Shc2	7.42018	7.54697	7.51957	7.56269	7.52914	7.52645	7.4673	7.41491
Madcam1	-1.15295	-1.84463	-0.802698	-1.70132	-1.42973	-1.57845	-1.9836	-2.62222
Tpgs1	5.96973	5.9898	5.85548	6.06416	5.91789	5.89812	5.83417	5.8275
Cdc34	5.99218	6.11623	5.94258	6.05973	6.03046	6.0284	5.94403	5.94386
Gzmm	-0.690096	-1.12735	-0.915596	-0.900991	-0.115334	-0.653368	-0.605789	0.125246
Bsg	8.48281	8.55774	8.45827	8.52706	8.48752	8.44766	8.44307	8.41585
Hcn2	7.93055	7.954	7.82606	7.92945	7.83558	7.76705	7.89055	7.88788
Polrmt	4.66991	4.70067	4.73534	4.69182	4.8176	4.81204	4.84901	4.63378
Fgf22	-0.828511	-0.890919	-0.381843	-0.346784	0.205586	-0.505958	-0.24743	-0.364928
Rnf126	5.42167	5.45469	5.52595	5.47784	5.52069	5.4962	5.46758	5.5322
Fstl3	3.19582	3.31883	3.45868	3.63667	3.90968	4.00721	3.43258	3.54687
Prss57	2.82069	2.84615	3.14703	3.09404	3.41818	3.5437	3.10841	3.00821
Palm	7.49101	7.57277	7.53509	7.54377	7.50341	7.53189	7.51325	7.50045
Misp	1.04003	1.4195	1.61092	1.73001	0.975098	0.97286	0.902942	1.02379
E130317F20Rik	2.00111	2.10608	2.11351	2.0648	1.99626	2.11869	2.20647	2.45286
Ptbp1	5.38494	5.22307	5.33712	5.24613	5.13588	5.22629	5.35927	5.19802
Lppr3	4.38154	4.3617	4.4607	4.46337	4.36742	4.30151	4.61717	4.47608
Prtn3	0.0239376	0.748857	1.79261	1.88054	1.72233	1.69983	1.87	1.06376
Elane	0.378782	1.02795	1.93779	1.60582	1.41742	1.43372	2.08572	1.3409
Cfd	1.76479	3.51469	3.51422	1.95878	2.942	3.1039	4.24538	2.64627
Med16	5.89838	5.91225	5.82011	5.98015	5.81123	5.86464	5.9032	5.73071
R3hdm4	6.08629	6.12972	6.01368	6.15283	6.07576	6.03444	6.08959	6.00288
Kiss1r	2.78948	2.89755	2.75819	2.95672	2.83447	2.76377	2.79841	2.93735
Arid3a	3.31842	3.27819	3.45868	3.20878	3.02043	3.26654	3.48778	3.25044
Wdr18	5.63093	5.75652	5.58096	5.77918	5.70329	5.67371	5.57853	5.71785
Grin3b	2.22175	2.5251	2.30834	2.29672	2.45336	2.48229	2.5093	2.33531
Tmem259	7.06694	7.10754	7.06303	7.0918	7.15065	7.07328	7.08583	7.06676
Cnn2	4.19166	3.92246	3.95854	4.0016	3.99816	3.88028	4.14319	3.65223
Abca7	7.97966	7.96533	8.01347	8.04131	8.01731	7.97014	8.16586	8.1735
Hmha1	2.72907	2.63898	3.13999	2.78122	3.02858	3.03092	3.59824	3.18172
Polr2e	5.08098	5.21232	5.06506	5.14005	5.18353	5.03849	4.98873	5.10709
Gpx4	7.63363	7.73137	7.56778	7.60841	7.64064	7.56593	7.4937	7.61377
Sbno2	5.89334	5.88744	5.98546	5.89039	6.11554	6.03594	5.838	5.77879
Stk11	6.44571	6.53726	6.51831	6.4865	6.48355	6.45395	6.44962	6.5205
Dos	7.54778	7.68686	7.61982	7.72929	7.73243	7.64063	7.55778	7.45421
Atp5d	7.99471	8.061	7.99712	8.07415	8.02769	7.97352	7.86868	7.87311
Midn	6.39703	6.38855	6.44874	6.42389	6.43937	6.39631	6.44572	6.25325
Cirbp	5.14017	4.80951	4.92146	5.12127	4.92635	5.02764	5.39378	5.05475
1600002K03Rik	1.69912	1.47131	1.74697	1.46992	1.84439	1.64409	1.65536	1.86672
Efna2	1.90244	1.6241	1.80156	2.14136	1.88088	1.95017	2.14736	1.42003
Mum1	5.24023	5.40449	5.32475	5.37538	5.15153	5.35289	5.36341	5.47499
Ndufs7	6.26994	6.30713	6.16493	6.31779	6.14741	6.23693	6.12449	6.25999
Gamt	5.34054	5.445	5.27497	5.43438	5.39333	5.40739	5.14799	5.35426
Dazap1	5.47659	5.35305	5.42088	5.47563	5.43841	5.43548	5.49962	5.38417
Mir6911	-1.49329	-2.02432	-2.81843	-2.99893	-2.00845	-2.94737	-3.30383	-3.24753
Rps15	7.24448	7.33797	7.18227	7.29105	7.22202	7.21139	7.13956	7.24072
Apc2	8.10321	8.02687	8.1398	8.12676	8.17686	8.17201	8.1217	8.17742
2310011J03Rik	4.89646	5.05496	5.07525	5.19317	5.01863	5.11338	4.97179	4.97968
Pcsk4	-0.0307239	-0.57843	0.478349	0.339327	-0.0225397	0.0269082	0.954011	-0.143949
Reep6	2.41309	1.98653	1.81931	2.29672	2.02915	2.05837	1.87664	2.08639
Adamtsl5	4.90467	4.53403	4.74349	4.50742	4.88278	4.81695	4.77016	5.08723
Plk5	2.96037	2.42354	3.10424	3.17275	3.46701	3.4583	2.84651	3.2176
Mex3d	4.98608	5.26404	4.91734	5.10416	5.17376	5.02097	4.9826	4.82473
Mbd3	5.76735	5.75521	5.73851	5.75502	5.6875	5.64521	5.61914	5.80667
Uqcr11	6.03564	6.08087	5.99036	6.02883	6.02775	5.87511	5.82605	5.82059
Tcf3	4.84235	4.90131	4.86916	4.95412	4.96228	4.99954	5.01226	4.91559
Onecut3	-1.49329	-1.93168	-1.66947	-2.99893	-2.10031	-1.31029	-1.24709	-0.262516
Atp8b3	-0.00313432	0.437661	0.742982	0.203087	0.560848	0.659646	0.412369	-0.121361
Rexo1	5.48026	5.5032	5.49384	5.4645	5.44553	5.42495	5.44544	5.59237
Klf16	4.47891	4.78924	4.67691	4.72827	4.74274	4.68199	4.58614	4.65765
Abhd17a	6.88903	7.08364	6.8846	6.99609	6.96854	6.91923	6.90543	6.92882
Adat3	1.64783	1.80998	1.89659	1.82591	1.44205	1.95017	1.98496	2.01682
Scamp4	5.00913	5.07603	5.01106	5.14378	5.01932	4.98839	4.8807	4.86558
Mir6912	-2.2934	-1.76253	-3.34208	-2.99893	-2.19842	-1.90811	-3.5663	-2.62222
Csnk1g2	7.41347	7.43359	7.39565	7.47647	7.39127	7.39859	7.47224	7.43945
Btbd2	7.2659	7.40181	7.27201	7.3218	7.30017	7.26113	7.22991	7.22827
Mknk2	5.82716	5.87346	5.8858	5.9838	6.04828	6.11779	6.07488	5.77992
Mob3a	5.24311	5.45683	5.29493	5.36664	5.36623	5.35868	5.28642	5.09086
Izumo4	4.34444	4.22375	4.21469	4.3225	4.11127	4.2117	4.38102	4.61372
Ap3d1	7.96249	8.01045	8.00913	8.05226	8.00419	8.02352	8.03105	7.99368
Dot1l	4.9679	4.48025	4.7971	4.47081	4.70677	4.82463	5.03912	4.92036
Plekhj1	5.23009	5.42379	5.27978	5.48668	5.36194	5.26581	5.16163	5.13609
Sf3a2	5.14788	5.18801	5.08629	5.19137	5.13021	5.19106	5.22602	5.12963
Amh	-1.34739	-2.75628	-0.97554	-2.5505	-1.55412	-2.80265	-1.24709	-2.28447
Jsrp1	-0.240208	0.129036	-0.302924	0.313089	-0.593971	-0.226561	-0.218868	-0.190213
Oaz1	7.53578	7.70264	7.54262	7.63464	7.6139	7.58969	7.50244	7.56183
Oaz1-ps	7.53578	7.70264	7.54245	7.63464	7.6139	7.58969	7.50244	7.56183
Mir1982	1.75674	1.82333	1.29299	1.48175	1.7489	1.44826	1.36587	1.54532
Lingo3	2.41309	2.61615	2.735	2.53671	2.46943	2.42465	2.46157	2.53692
Lsm7	3.26836	3.24633	3.43873	3.16544	3.3612	3.39779	3.28083	3.34066
Sppl2b	5.17757	4.98761	5.14377	5.02453	5.05502	5.09617	5.14524	5.07261
Tmprss9	1.6907	1.69118	1.50524	1.51666	1.49794	1.4698	1.45721	1.34901
Timm13	5.95618	6.05458	5.89001	5.94267	5.92008	5.91588	5.79838	5.89795
Lmnb2	3.93065	3.84929	3.80666	3.95569	3.95174	3.91602	3.87492	3.87641
Gadd45b	3.00181	3.00107	2.9756	2.91808	2.69796	3.00657	2.52205	2.93466
Gng7	4.49351	4.31401	4.31349	4.34048	4.25143	4.3085	4.24666	4.44521
Diras1	7.9546	8.00405	7.91837	7.95247	7.98991	7.93032	7.97169	7.90715
Slc39a3	6.18441	6.24894	6.19286	6.33215	6.22013	6.08037	6.25463	6.16182
Sgta	6.20673	6.31306	6.25164	6.18528	6.28454	6.14426	6.08709	6.15721
Thop1	5.83483	5.97866	5.81237	5.97807	5.91129	5.89878	5.86493	5.80298
Map2k2	6.83941	6.89633	6.77348	6.87996	6.74344	6.7989	6.76502	6.77515
Zbtb7a	7.5948	7.67701	7.60471	7.65191	7.59572	7.59225	7.64292	7.51495
Pias4	4.83282	5.07951	4.87554	4.87561	5.03087	4.91113	4.91976	4.82109
Eef2	10.4228	10.4403	10.4134	10.4669	10.4299	10.4026	10.4654	10.3958
Snord37	-3.46452	-2.46904	-2.27585	-2.5505	-1.69026	-2.94737	-2.71981	-4.37579
Dapk3	5.45313	5.58633	5.44252	5.54138	5.52406	5.39102	5.39205	5.2455
Atcayos	3.14432	3.28545	3.11146	3.10172	3.42438	2.94127	3.11683	3.11907
Nmrk2	-1.83858	-2.12331	-4.88315	-4.14082	-3.17725	-3.49646	-4.30101	-4.88315
Atcay	6.97239	7.18604	7.09321	7.10954	7.14175	7.03391	7.03597	7.05271
Zfr2	5.45562	5.37078	5.39004	5.3352	5.34897	5.29425	5.58614	5.38022
Matk	1.57648	1.57758	1.73767	1.44597	1.83822	1.15228	1.78794	1.33274
Mrpl54	4.80285	5.05708	4.96197	4.85644	4.88951	4.83642	4.75674	4.87263
Apba3	4.33095	4.51358	4.46916	4.49435	4.3117	4.41225	4.39032	4.13162
Mir3057	1.11748	1.19135	1.30564	1.07644	1.68842	1.07943	1.62417	1.42003
Tjp3	-0.690096	-1.02808	-1.10346	-2.06432	-3.39265	-1.17047	-0.984169	-4.88315
Pip5k1c	7.9591	8.0455	7.98279	7.97121	7.99269	7.98681	7.99512	7.96988
Cactin	4.37235	4.47179	4.40008	4.55017	4.43033	4.44433	4.49748	4.47978
Tbxa2r	2.88116	2.4059	2.35167	2.65111	2.82514	2.92056	2.11406	2.61635
Gipc3	-0.828511	0.0172795	-0.381843	-0.188461	-0.697782	-0.852782	-0.30631	0.0674327
Hmg20b	5.11364	5.11795	5.07617	4.98457	5.08466	5.08167	4.99636	5.05475
Mfsd12	4.35514	4.51461	4.41912	4.59442	4.37277	4.57262	4.34201	4.49904
4930404N11Rik	3.8926	3.98321	3.91174	4.00775	3.87392	3.97871	3.99866	4.06178
Fzr1	6.04765	6.19056	6.09925	6.13187	6.10915	6.13699	6.10908	6.09528
Dohh	5.77981	5.95345	5.79734	5.97911	5.92446	5.80518	5.77948	5.89345
Mir6913	-2.76325	-1.68486	-1.88248	-2.75737	-2.41726	-1.76709	-2.18988	-1.11303
Smim24	-0.563805	-0.54373	-1.03808	-0.115372	-0.436004	-1.043	-0.109958	0.00720526
Nfic	9.12546	9.00647	9.00043	8.98344	9.07044	9.04694	9.09883	9.06799
Celf5	3.25128	3.307	3.73132	3.1544	3.42849	3.29296	3.18255	3.50029
Ncln	5.88368	5.94813	5.91859	5.96391	5.95794	5.98076	5.88687	5.85801
S1pr4	-1.03651	-0.0299654	0.455831	0.259136	0.24345	0.191492	0.375381	0.616744
Gna15	-1.09355	-0.890919	-0.341844	-0.478083	-0.593971	-0.852782	-0.464967	-0.658137
Gna11	6.69503	6.68516	6.62559	6.74417	6.70854	6.75408	6.67609	6.51713
Aes	9.17517	9.26231	9.16802	9.25443	9.2207	9.19655	9.12805	9.18085
Tle2	4.11347	3.88634	3.97249	3.66547	3.89191	3.95727	4.42806	4.36148
Tle6	1.85046	1.94438	1.69984	1.73001	1.70886	1.68149	1.72317	2.49368
BC025920	0.746967	0.538263	0.626839	-0.0122448	0.605147	0.00740604	0.375381	1.42771
Sirt6	4.30636	4.37536	4.33061	4.24829	4.18852	4.36419	4.25559	4.36649
Ankrd24	4.8556	4.64065	4.79149	4.60121	4.53803	4.59321	5.11751	5.02024
Gm10778	-0.646759	-1.93168	-2.81843	-1.93291	-1.62059	-1.83588	-1.08366	-2.50064
Zfp433	0.985991	0.83048	1.44934	0.463804	1.22265	1.38921	1.19596	0.69519
Zfp781	0.499423	1.14955	0.565062	-0.305545	0.419155	0.56943	1.08579	-0.475168
Zfp873	1.09213	1.03944	1.07392	0.911351	0.845685	1.18736	1.25824	1.56634
AU041133	2.0079	2.00423	2.31461	2.20695	2.08235	2.22383	2.03918	2.25125
Zfp938	4.27712	4.2781	4.3213	4.29763	4.21853	4.32534	4.29574	4.26083
1190007I07Rik	1.13	1.60102	1.58002	1.73989	1.70886	1.46265	1.45721	1.6671
Tdg	4.05397	3.93789	4.17561	4.09503	4.00507	4.12726	3.86662	4.06054
Gm9855	4.04904	3.9302	4.16697	4.0776	4.00231	4.125	3.86662	4.06054
Glt8d2	2.0214	1.81667	1.44934	1.60582	1.63244	1.51193	1.72317	0.940357
Hcfc2	3.62949	3.7961	3.72898	3.64721	3.72797	3.72029	3.74502	3.5398
Nfyb	4.12289	4.00535	4.21971	4.3225	4.27447	4.07201	4.13353	4.26083
Txnrd1	7.12747	7.29519	7.24804	7.30318	7.25889	7.27075	7.03412	7.0404
Chst11	6.01682	6.00307	5.95768	6.03084	6.07412	5.9622	5.89342	5.94185
Slc41a2	5.58509	5.66955	5.63395	5.56172	5.76113	5.78062	5.60123	5.56999
D10Wsu102e	4.98952	5.00016	4.91218	5.1032	4.90289	5.01488	4.89465	4.96128
Aldh1l2	3.05528	2.78262	2.87735	2.85582	2.8126	3.07842	2.99411	3.10955
A230046K03Rik	6.76414	6.72216	6.75975	6.74356	6.71908	6.75518	6.72263	6.83069
Appl2	5.24383	5.122	5.24983	4.93058	5.12705	5.12643	5.53569	5.3653
1500009L16Rik	1.75674	1.6241	1.82811	1.63788	1.58162	1.65666	1.72317	1.88914
Nuak1	6.43566	6.39918	6.34343	6.27722	6.31236	6.3348	6.30129	6.31796
Ckap4	5.52655	5.49384	5.49108	5.52647	5.41111	5.5397	5.4224	5.33397
Tcp11l2	4.90103	4.89816	4.8477	4.85189	4.77056	4.77791	5.00925	4.8915
Polr3b	5.36589	5.33859	5.27657	5.37855	5.37745	5.31918	5.35512	5.35326
Rfx4	-2.58907	-1.93168	-1.39937	-2.06432	-2.82405	-2.33611	-3.30383	-1.46453
Ric8b	5.75174	5.80696	5.66127	5.74033	5.75909	5.72834	5.68392	5.69894
Fhl4	-1.34739	-0.806226	-0.156965	-0.840835	0.146861	-0.817573	-1.24709	-0.625985
Tmem263	4.80967	4.77471	4.64243	4.66355	4.57377	4.61673	4.70644	4.6601
Mterf2	3.37208	3.48138	3.37114	3.34774	3.42849	3.34633	3.34919	3.15652
Cry1	3.52203	3.68711	3.87402	3.8862	4.06577	3.99489	3.82092	3.75041
Btbd11	4.46787	4.49388	4.54712	4.65443	4.61497	4.65483	4.4758	4.40492
Pwp1	4.60752	4.49597	4.57351	4.56554	4.46078	4.62954	4.57599	4.60528
Prdm4	5.69287	5.82657	5.73325	5.56728	5.7599	5.66751	5.6668	5.62614
Ascl4	-0.485364	-0.509845	-0.381843	-0.188461	-0.466244	-0.322017	0.430514	0.533786
Rtcb	6.71489	6.72261	6.65924	6.73339	6.72306	6.65709	6.60423	6.73935
Fbxo7	4.79599	4.8799	4.89031	4.74677	4.85783	4.92354	4.86076	4.85921
Syn3	4.49955	4.52894	4.53105	4.37418	4.61588	4.65874	4.66489	4.70107
Timp3	8.5568	8.34703	8.52282	8.45802	8.51166	8.51357	8.51849	8.36232
1810014B01Rik	1.01327	0.129036	0.626839	0.621791	0.402517	0.835836	0.693513	0.69519
Hsp90b1	8.17497	8.12263	8.13991	8.04268	8.14931	8.09643	8.05647	8.02937
Ttc41	1.17899	0.662337	0.455831	-0.346784	0.515146	0.921687	1.14193	1.69918
Nt5dc3	6.43849	6.53954	6.58012	6.48209	6.5657	6.63324	6.53517	6.40781
Stab2	-0.410968	-0.381745	0.0675548	0.0526266	-0.240408	-1.043	0.108639	-1.46453
1700113H08Rik	-2.16556	-2.92464	-1.88248	-2.06432	-3.17725	-2.33611	-1.72076	-1.3033
Igf1	3.87226	3.34453	3.34993	3.17275	3.52196	3.32285	3.68015	3.7132
Pmch	-1.4185	-1.54104	-2.00207	-1.09815	-1.49059	-1.70143	-1.89056	-4.88315
Parpbp	-0.306107	1.11739	0.500521	0.286365	0.743694	0.81355	0.663143	-0.533617
Nup37	1.80436	1.73424	1.65112	1.8166	1.79425	1.65666	1.80889	1.28281
Ccdc53	3.9816	4.04294	3.91381	4.00365	3.89934	3.91733	4.02128	4.02428
Dram1	0.697381	0.632304	1.48314	1.19612	1.06242	0.98288	1.23778	0.896758
Gnptab	6.31721	6.36477	6.32646	6.30245	6.36349	6.37125	6.30744	6.31615
Sycp3	2.39246	2.51279	2.37586	2.01683	2.37877	2.6583	2.43934	2.15276
Chpt1	5.14942	5.13076	5.16214	5.12693	5.24081	5.23102	5.03912	5.07689
Mybpc1	1.22638	-0.847951	-2.43506	-2.06432	-1.31522	-2.14942	0.25836	-0.724674
Spic	-2.96139	-2.22961	-2.27585	-2.75737	-3.95341	-1.76709	-2.08306	-2.28447
Gm4925	-1.03651	-2.12331	-1.31951	-1.17035	-1.49059	-0.397996	-1.03306	-1.35507
Arl1	5.94781	6.02273	5.91447	6.03687	5.95936	5.96125	5.79488	6.00352
Utp20	4.5282	4.51872	4.57873	4.46783	4.7518	4.63273	4.63879	4.56494
Slc5a8	-2.04814	-3.33501	-3.05663	-3.65309	-2.3037	-2.94737	-2.43065	-4.88315
Ano4	5.5348	5.46591	5.47717	5.49253	5.52165	5.48523	5.46042	5.53087
Gas2l3	6.16364	5.67416	5.70309	5.61572	5.95223	6.01045	5.61419	5.77842
Slc17a8	3.51966	3.96224	3.79101	3.87951	3.74622	3.66068	3.75945	3.6241
Scyl2	5.43811	5.36108	5.47227	5.34656	5.4905	5.50057	5.44823	5.26813
1500026H17Rik	1.04003	1.10651	0.950497	1.31988	1.48219	0.81355	1.33731	1.27432
Actr6	3.5779	3.58693	3.56508	3.63137	3.62953	3.37134	3.56167	3.34066
Uhrf1bp1l	7.12063	7.1089	7.10343	7.19464	7.17121	7.15254	7.10025	7.17851
Anks1b	5.78526	5.84797	5.85117	5.81351	5.82573	5.79775	5.79881	5.81291
Apaf1	2.96736	3.33523	3.219	3.22997	3.37406	3.356	3.55961	3.48381
Ikbip	4.04574	3.91936	3.81995	3.93218	3.82012	4.02065	3.82607	4.03689
Slc25a3	8.48197	8.57727	8.46471	8.60153	8.54106	8.49657	8.48287	8.49067
Tmpo	5.15632	5.1983	5.19904	5.13444	5.20708	5.12643	5.32634	5.19634
Nedd1	2.62683	2.21647	2.44036	2.02494	2.39568	2.23645	2.45272	2.03201
Cdk17	5.14017	5.02421	4.97489	5.04361	4.97218	4.97465	5.12101	5.31754
Elk3	3.43394	3.54321	3.55717	3.65507	3.41818	3.46367	3.53466	3.44461
Lta4h	5.45313	5.4477	5.51782	5.4918	5.41837	5.41342	5.491	5.40523
Hal	3.03546	2.95934	2.96368	2.96938	2.75805	2.91272	2.95703	2.96927
Ccdc38	3.31295	3.56126	3.31282	3.31836	3.43054	3.35985	3.31053	3.35885
Snrpf	3.79775	3.88952	3.69092	3.84788	3.79961	3.66691	3.67255	3.95423
4933408J17Rik	2.74136	2.82307	2.45179	2.6406	2.84066	2.48934	2.59224	2.79321
Ntn4	3.40849	3.08661	3.17142	3.39229	3.24469	3.23545	3.48994	3.44461
Metap2	6.98579	6.94963	6.97348	7.0736	6.97453	6.9922	6.98777	7.01067
Vezt	6.58003	6.49564	6.66171	6.56989	6.61821	6.62686	6.61419	6.63043
Mir331	-0.410968	-1.07686	-0.302924	-0.900991	-1.15887	-0.094267	-0.218868	0.0275617
Fgd6	3.11629	3.52698	3.34993	3.27484	3.44686	3.64656	3.56783	3.33455
Nr2c1	3.93422	3.83452	3.83747	3.7896	3.87994	3.77754	3.92857	4.2194
Ndufa12	4.8048	5.04431	4.7094	4.97519	4.83243	4.76853	4.80969	4.79089
Tmcc3	5.86368	5.85448	5.94965	5.74647	5.94363	5.92143	5.74228	5.73343
Cep83os	4.73995	4.81621	4.74	4.8416	4.72278	4.81204	4.91332	4.71839
Cep83	4.91646	5.01914	4.9194	4.8393	4.85706	4.9144	4.90036	4.90394
Plxnc1	8.55361	8.68051	8.69576	8.67636	8.57144	8.60333	8.6285	8.52167
Cradd	3.34013	3.10586	2.97955	3.19448	3.28836	2.96421	3.13355	3.16114
Socs2	4.60752	4.7231	4.68056	4.59578	4.72696	4.77215	4.71849	4.40298
Mrpl42	5.20444	5.31928	5.18542	5.02655	5.19082	5.08575	5.01226	5.05413
Ube2n	7.26129	7.37131	7.24907	7.25252	7.28067	7.29608	7.23637	7.17438
Nudt4	7.88317	7.94438	7.86102	7.9197	7.95039	7.9371	7.86378	7.86562
Eea1	7.20806	7.13875	7.23157	7.1287	7.14535	7.19222	7.23233	7.29526
Btg1	5.22281	5.43688	5.1948	5.20481	5.27034	5.16104	5.25113	5.11603
Dcn	9.14586	8.88468	8.76894	8.85571	8.78176	8.77597	9.03203	9.21827
Lum	6.04806	5.74385	5.42957	5.38879	5.7906	5.82655	5.69052	5.84552
Epyc	2.61797	2.50037	2.57705	2.29672	2.49319	2.45376	2.29331	2.4491
Gm10754	2.18024	2.26131	1.87977	2.34284	2.43302	2.3139	2.17453	2.04704
Atp2b1	8.18466	8.04078	8.13593	8.03342	8.19207	8.19205	8.14704	8.19052
Poc1b	3.26553	3.39011	3.30024	3.3315	3.31305	3.32679	3.2908	3.4465
Galnt4	2.10617	2.33775	2.36985	1.8983	2.18321	2.13675	2.28336	1.8032
Dusp6	4.48623	4.34444	4.55244	4.43627	4.57284	4.57593	4.45601	4.08138
Kitl	6.35501	6.36905	6.42467	6.26444	6.37926	6.44106	6.29882	6.33209
Tmtc3	4.68589	4.70699	4.7971	4.63735	4.75016	4.74591	4.71756	4.81158
Cep290	4.49714	4.64065	4.54179	4.44083	4.44665	4.54245	4.53675	4.49265
4930430F08Rik	4.29945	4.30809	4.40743	4.1498	4.3239	4.36131	4.34201	4.43762
Mgat4c	1.55808	1.95048	1.87977	1.76914	1.98513	1.55957	1.62417	1.5168
Nts	2.18624	2.67625	2.12069	2.52533	2.64236	2.63307	2.16372	2.23821
Rassf9	0.90093	1.43698	1.56957	1.19612	1.43388	1.53935	1.51786	1.35708
Lrriq1	1.95262	1.63928	1.41474	1.44597	1.45017	1.82765	1.71579	1.60071
Slc6a15	7.31998	7.37642	7.28604	7.31583	7.33676	7.38508	7.29092	7.45033
Tmtc2	5.36854	5.34497	5.36079	5.25736	5.30824	5.2801	5.27517	5.29829
Gm15663	3.05855	3.08661	3.08602	3.28163	3.02315	3.06669	2.84312	3.01076
Mettl25	2.67885	2.42792	2.52392	2.7276	2.46543	2.40987	2.53049	2.43773
Ccdc59	3.48354	3.35835	3.50328	3.45662	3.51424	3.19507	3.29328	3.3119
Ppfia2	5.58509	5.55215	5.62451	5.54983	5.69989	5.62456	5.45821	5.47869
Acss3	0.90093	0.992922	1.22803	0.144772	0.845685	1.12539	1.5679	1.29965
Lin7a	6.05423	6.0641	6.00449	6.00853	5.95473	6.02416	5.98949	5.93546
Ptprq	-0.306107	-0.765674	0.0675548	-0.151454	-0.139497	-0.346901	-0.163385	0.707859
Otogl	-1.83858	-1.41026	-2.27585	-1.59813	-1.8406	-1.98415	-1.6428	-4.00118
Ppp1r12a	5.5506	5.58682	5.65325	5.48521	5.53077	5.64757	5.60922	5.41733
Pawr	2.58199	2.65026	2.4966	2.53103	2.44526	2.59111	2.75587	2.48266
Syt1	7.9037	8.09012	8.05772	8.11708	8.0554	8.06243	8.07326	7.932
Nav3	3.85729	3.57908	3.71719	3.45362	3.31971	3.51464	3.08855	3.34472
E2f7	-0.146682	-1.23395	0.606539	-0.783087	-0.930917	-0.203652	0.278534	-0.418995
Csrp2	3.60952	3.41016	3.53585	3.73876	3.53538	3.44929	3.74321	3.58514
Zdhhc17	7.22675	7.17338	7.18334	7.11761	7.20803	7.19478	7.20558	7.24045
Osbpl8	6.31344	6.3222	6.38611	6.35202	6.31236	6.36863	6.21788	6.25514
Bbs10	2.22175	2.27596	2.36985	1.98395	2.16852	2.47521	2.47037	2.1294
Nap1l1	7.83347	7.8662	7.86142	7.90344	7.84668	7.86503	7.85835	7.91682
Gm5176	-2.04814	-2.34437	-2.00207	-3.65309	-2.10031	-2.06442	-2.568	-3.06403
Phlda1	4.58497	4.58783	4.36576	4.40866	4.55319	4.36706	4.35869	4.49357
Krr1	4.39327	4.53707	4.34294	4.34048	4.35125	4.4695	4.47798	4.41944
Glipr1	2.48791	2.60459	2.33942	2.17817	2.38725	2.3646	2.6398	2.59263
Caps2	-2.58907	-2.75628	-2.81843	-4.14082	-2.19842	-3.49646	-1.6428	-1.46453
Kcnc2	4.73791	4.82536	4.84337	4.76139	4.87149	4.70865	4.78346	4.88524
Atxn7l3b	7.2156	7.24754	7.17152	7.27053	7.22395	7.23005	7.1418	7.22001
Trhde	2.21001	2.49204	2.28936	2.50809	2.29109	2.42832	2.59626	1.90573
Tph2	0.269918	0.691757	0.261793	0.802398	0.368653	0.102383	0.0393893	0.383952
Tbc1d15	4.9486	4.95462	4.9877	5.05256	5.04433	5.03187	4.94443	5.003
Rab21	6.52897	6.6149	6.52913	6.59358	6.54216	6.57025	6.48586	6.44115
Tmem19	5.72364	5.7315	5.66679	5.78814	5.82885	5.71638	5.68155	5.65668
Thap2	3.5409	3.47293	3.66416	3.37653	3.61155	3.83675	3.68393	3.83514
Zfc3h1	5.82284	5.62592	5.80905	5.50563	5.77937	5.80941	5.91251	5.9987
Lgr5	4.30498	4.13148	4.09047	3.98922	3.93593	4.11022	4.00775	3.87078
A930009A15Rik	0.518585	-0.103867	0.235595	-1.50182	0.351419	0.102383	0.517964	0.781625
Tspan8	5.74972	5.76173	5.81237	5.87141	5.71723	5.71488	5.76837	5.75037
Ptprr	5.27022	5.29911	5.41797	5.39114	5.26057	5.34174	5.3408	5.46429
Ptprb	4.77821	4.52588	4.58522	4.37259	4.59131	4.76054	4.79751	4.37446
Kcnmb4	4.50557	4.73287	4.49562	4.52753	4.57563	4.42884	4.38102	4.42136
Kcnmb4os1	3.40849	3.7961	3.50054	3.49214	3.597	3.47968	3.43483	3.66366
Kcnmb4os2	3.65569	3.86551	3.58077	3.8132	3.71455	3.59196	3.60824	3.32635
Cnot2	5.26029	5.2536	5.17426	5.15859	5.11433	5.30378	5.09919	5.2692
Myrfl	1.69912	1.16012	1.17388	0.231384	0.997429	1.08874	0.849999	1.31629
Rab3ip	5.27867	5.33101	5.28618	5.42676	5.27948	5.29877	5.15482	5.27666
4933412E12Rik	0.90093	0.61705	0.966514	1.1524	0.730423	1.18736	0.412369	1.3889
Best3	-0.604686	-0.41272	-0.858043	-0.963764	-0.528695	-1.0029	-0.891095	-0.262516
Cct2	7.26111	7.35747	7.35895	7.35031	7.31886	7.34291	7.24505	7.24915
Frs2	5.70337	5.52226	5.59068	5.38092	5.73935	5.68104	5.72722	5.76105
Yeats4	4.55513	4.70608	4.58911	4.65443	4.59681	4.57593	4.70271	4.64782
9530003J23Rik	-4.88315	-3.33501	-4.88315	-2.20891	-3.39265	-3.7384	-4.88315	-1.85378
Lyz2	5.65494	5.77596	5.62199	5.75928	5.94255	5.97826	6.24152	5.82095
Lyz1	-0.340221	0.0630261	-1.17194	0.144772	0.298444	-0.115491	0.0393893	-0.446808
Cpsf6	6.15792	6.04677	6.12624	5.84075	6.02503	6.16311	6.14455	6.11265
Cpm	1.09213	0.969091	1.25437	1.31988	1.13472	0.98288	1.72317	0.669512
Mdm2	5.22791	5.31397	5.29809	5.16868	5.36731	5.29123	5.32027	5.25848
Slc35e3	5.31953	5.26588	5.27336	5.38407	5.32158	5.40413	5.25176	5.2131
Nup107	4.58042	4.62643	4.44221	4.56415	4.62307	4.5047	4.5451	4.49357
Rap1b	6.81006	6.89633	6.86977	6.96061	6.95273	6.98537	6.82947	6.78509
Mdm1	2.0546	2.38354	2.05479	1.97561	2.07187	1.9192	2.24286	2.30644
Dyrk2	3.33743	3.14893	3.48672	3.25775	3.17046	3.14909	3.28333	3.10955
Cand1	7.7836	7.78812	7.80742	7.90371	7.82235	7.81648	7.86117	7.82966
1700025F24Rik	-1.09355	-1.84463	-0.858043	-2.20891	-1.49059	-1.31029	-1.13611	-2.01098
Grip1	5.26455	5.34613	5.35472	5.29639	5.24898	5.26118	5.33057	5.37228
Helb	3.03878	2.86241	2.97955	3.00669	2.85602	2.89956	3.07995	3.08791
Irak3	2.59559	2.64275	2.66311	2.97357	2.66346	2.7135	3.00019	2.58921
Tmbim4	5.63148	5.75129	5.67534	5.66128	5.5255	5.65621	5.54925	5.59749
Llph	2.45347	2.55342	2.27013	2.47297	2.55472	2.66142	2.20647	2.30227
Hmga2	-2.43368	-2.46904	-2.27585	-4.88315	-3.64595	-3.28933	-2.30525	-2.75501
9230105E05Rik	-1.34739	-1.68486	-0.0891735	-0.900991	-1.69026	-1.70143	-1.56885	-2.75501
Msrb3	4.04739	3.95164	4.08314	4.05006	3.84342	3.80604	3.84649	3.90557
Gm15910	0.247123	-0.181759	0.362072	0.144772	-0.115334	-0.2735	-0.27657	-0.985172
Lemd3	4.93173	4.88628	4.84878	4.90884	4.98061	5.00385	4.84985	4.86205
Wif1	-3.19113	-3.11528	-1.88248	-2.36962	-2.54054	-2.67113	-2.18988	-4.88315
Tbc1d30	5.72002	5.82034	5.83491	5.78933	5.86232	5.85547	5.94364	5.9717
Gns	7.06409	6.99219	7.10614	7.07604	7.08358	7.09466	7.04667	6.93624
Rassf3	6.09668	6.20307	6.06897	6.04486	6.09886	6.06983	6.11014	6.13452
Tbk1	5.90568	5.91771	5.95267	5.93086	5.99066	5.88716	5.79006	5.84767
Xpot	6.48002	6.52914	6.47452	6.55492	6.51339	6.52167	6.46318	6.52699
D930020B18Rik	-3.19113	-3.11528	-4.17236	-1.93291	-2.3037	-2.5506	-2.568	-2.90126
BC048403	4.59742	4.59661	4.57742	4.51895	4.58579	4.55005	4.51672	4.5788
Srgap1	6.66363	6.55763	6.62623	6.49746	6.6797	6.72434	6.63903	6.58351
Gm9079	0.610751	0.107367	0.815521	0.704863	0.24345	0.458906	0.237899	0.81714
Tmem5	4.37235	4.4472	4.39417	4.53323	4.29038	4.48368	4.21168	4.13044
Avpr1a	-0.604686	-0.806226	0.0375417	-1.93291	0.280344	0.647098	-0.498904	-0.364928
A130077B15Rik	-0.646759	-1.54104	-2.13247	-2.20891	-0.662342	-2.5506	-1.19053	-0.594534
Ppm1h	7.20862	7.14292	7.13323	7.19014	7.09187	7.0649	7.08762	7.20849
Mir8104	2.66172	2.709	2.85602	2.85127	2.77754	2.53773	2.64758	2.58578
Mon2	6.43156	6.35187	6.40937	6.3732	6.40115	6.40472	6.40816	6.48045
Usp15	6.95227	6.98348	6.95403	6.88581	6.94162	6.93947	6.87594	6.9217
Fam19a2	6.23597	6.2585	6.23065	6.22804	6.06093	6.12205	6.19981	6.27523
Slc16a7	3.17181	3.1804	2.91085	2.77643	3.08181	2.78397	2.99411	3.03359
Lrig3	1.69912	1.58543	1.42636	1.37164	1.65369	1.6314	1.97263	1.66059
Xrcc6bp1	1.9736	1.73424	1.75621	1.92453	1.83822	1.80523	1.64762	1.90573
Ctdsp2	6.62575	6.46055	6.61452	6.56677	6.65028	6.58656	6.74726	6.61349
Mir546	3.02879	2.84615	2.74432	2.77162	2.94775	2.82074	3.02429	2.71692
Avil	9.64077	9.67603	9.68855	9.73627	9.72875	9.73486	9.72372	9.75894
Tsfm	3.80362	3.85255	3.79774	3.93863	3.72295	3.81448	3.71942	4.18922
Mettl21b	-0.877766	-1.17966	-0.553947	-1.09815	-0.88935	-1.08425	-0.721229	-0.475168
Mettl1	3.14123	3.43429	3.03756	3.27484	3.27013	3.23545	3.08282	3.64731
March9	4.92905	5.02059	4.82042	4.99286	4.96653	4.86379	4.7861	5.03226
Cdk4	5.09859	5.14479	5.04162	5.02756	5.061	4.99459	4.88399	4.89566
Tspan31	6.31653	6.32337	6.30655	6.40693	6.36966	6.24995	6.13455	6.24838
LOC100504703	-0.690096	-0.890919	-0.508958	-0.226443	-0.973718	-2.5506	-0.803664	-0.691022
Agap2	5.42167	5.38323	5.44538	5.50418	5.35979	5.383	5.49046	5.59365
Os9	7.15184	7.12028	7.17044	7.23712	7.20383	7.22952	7.14575	7.10827
B4galnt1	5.30374	5.36394	5.50554	5.43514	5.56622	5.49139	5.57548	5.25416
Slc26a10	0.46032	0.192157	-0.0564361	-0.840835	0.0646454	0.225649	0.108639	1.1683
Arhgef25	6.41216	6.50733	6.48846	6.41813	6.35865	6.40285	6.62555	6.45554
Dtx3	6.32743	6.15997	6.23107	6.1889	6.18711	6.21106	6.40673	6.40611
F420014N23Rik	3.82109	3.86874	3.75226	3.73135	3.89786	3.65755	3.86662	4.10193
Pip4k2c	6.47788	6.48623	6.43262	6.42082	6.46088	6.4535	6.4446	6.50674
Kif5a	10.7219	10.6516	10.7496	10.7266	10.7417	10.7336	10.8276	10.8154
Dctn2	8.69921	8.72059	8.73471	8.78833	8.70692	8.69457	8.67686	8.74372
Mbd6	5.62155	5.43253	5.71322	5.40751	5.76072	5.67719	6.09101	6.05401
Ddit3	4.20945	4.37876	4.26413	4.28587	4.19578	4.18916	4.35394	4.24462
Mars	5.21842	5.11524	5.20581	5.25477	5.19746	5.27756	5.08709	5.15934
Arhgap9	-0.00313432	0.454922	0.867628	0.979668	1.07297	0.802277	1.62417	0.490447
Gli1	3.6899	3.26357	3.74764	3.5325	3.34388	3.47791	3.78435	3.63077
R3hdm2	6.60181	6.56932	6.58661	6.51375	6.52088	6.49654	6.65984	6.63334
Stac3	-0.240208	-0.980896	-0.915596	-1.70132	-0.771386	-0.0123634	-0.336676	-0.867729
Ndufa4l2	0.480004	1.10651	0.646857	0.286365	0.515146	0.487341	0.337419	0.547948
Shmt2	4.62309	4.59271	4.47896	4.62407	4.65415	4.6367	4.67253	4.59765
Nxph4	1.39138	1.22192	1.22803	1.44597	1.26928	1.24678	1.20653	1.08334
Lrp1	7.8312	7.40056	7.64787	7.54852	7.75892	7.74422	7.85499	7.75828
Stat6	6.87678	6.92951	6.90422	6.89662	6.86151	6.85777	6.94974	6.80512
Nab2	4.23864	4.38552	4.04782	3.93002	4.24677	4.31843	4.13768	3.99873
1700012D01Rik	-0.928763	-2.60552	-1.39937	-2.36962	-2.19842	-1.31029	-1.30596	-0.867729
Tmem194	2.75354	2.7054	3.03756	2.76679	2.98455	2.93095	3.09425	2.68524
Myo1a	4.76022	4.83611	4.80825	4.85189	4.72779	4.72666	4.97566	4.73086
Zbtb39	3.78989	3.82127	3.99414	3.87279	3.91848	3.83537	3.99561	3.77921
Gpr182	0.763124	0.0403341	0.15402	0.463804	0.0646454	0.354724	0.808976	0.490447
Rdh1	-4.24367	-2.12331	-3.69829	-2.20891	-2.82405	-3.49646	-2.71981	-1.71204
Rdh9	-2.04814	-1.61116	-0.915596	-1.41155	-0.662342	-0.888872	-1.6428	-0.262516
Prim1	2.23918	2.1597	2.12069	2.04102	2.16852	2.2111	2.28336	2.21621
Naca	6.655	6.68195	6.72634	6.76912	6.60872	6.65122	6.61121	6.73394
Ptges3	7.04687	7.13156	7.06698	7.09252	7.07605	7.08786	6.8975	6.98374
Atp5b	10.0641	10.1155	10.0309	10.1117	10.0496	10.0519	10.0107	10.0456
Mir677	-3.80212	-4.88315	-2.81843	-4.88315	-3.64595	-3.7384	-1.72076	-2.18743
Baz2a	6.27487	6.19056	6.4174	6.21924	6.32262	6.37673	6.41187	6.30107
Rbms2	5.04344	4.65938	4.67934	4.52468	4.8624	4.74664	4.75854	4.61457
Gls2	3.55024	3.70164	3.83747	3.7363	3.63132	3.61791	3.70458	3.46154
Spryd4	3.38519	3.44513	3.35906	3.65507	3.25399	3.33854	3.32757	3.05606
Mip	-4.24367	-2.12331	-2.61405	-4.88315	-2.67534	-3.28933	-2.30525	-2.38851
Timeless	4.34444	4.49179	4.81822	4.88455	4.78106	4.79721	4.49209	4.41655
Apof	-2.58907	-4.88315	-2.61405	-2.06432	-2.3037	-3.49646	-2.43065	-4.88315
Stat2	6.27628	6.18831	6.98606	6.85346	6.48577	6.46494	6.21559	6.36246
Il23a	-1.83858	-2.12331	-3.05663	-3.28925	-3.64595	-3.7384	-4.88315	-4.88315
Pan2	4.47033	4.23253	4.43215	4.20969	4.19215	4.18374	4.74138	4.50903
Cnpy2	4.2314	4.118	3.96054	4.20613	4.02287	4.00106	3.97412	3.86796
Cs	8.29147	8.30726	8.29829	8.34713	8.32562	8.30613	8.27367	8.2577
Coq10a	5.0525	5.10843	4.94186	5.17598	5.19263	5.01732	5.18986	4.9108
Ankrd52	8.20059	8.15872	8.22028	8.17571	8.26031	8.20469	8.21649	8.22687
Mir6914	2.70836	2.95631	2.87735	2.73255	2.99013	2.93612	3.00019	2.84
Mir6915	-1.34739	-0.57843	-0.749398	-1.41155	-1.15887	-2.33611	-0.846717	-2.75501
Slc39a5	-0.375161	0.348111	-0.422983	-0.115372	0.280344	-0.322017	0.108639	1.02379
Nabp2	5.44188	5.48389	5.39078	5.53075	5.36301	5.42357	5.31905	5.3628
Rnf41	6.9726	7.0718	6.99365	7.01631	6.93964	6.9675	6.92496	6.95314
Smarcc2	7.25809	7.21228	7.20629	7.09734	7.25542	7.20819	7.34229	7.34983
Myl6	8.09655	8.18756	8.14553	8.17753	8.12202	8.12535	7.97362	8.15764
Myl6b	3.65785	3.80454	3.73834	3.81553	3.78685	3.81588	3.51141	3.79859
A430046D13Rik	2.28466	2.26131	2.42306	2.42477	2.09276	2.43928	2.63198	2.39528
Esyt1	8.39043	8.526	8.48318	8.59312	8.59571	8.56648	8.47107	8.41083
Mir6916	-0.563805	0.252633	-0.46533	-0.265452	-0.697782	-0.115491	-0.0086955	-0.905824
Zc3h10	3.60729	3.76702	3.50054	3.50668	3.57304	3.46009	3.60824	3.41014
Rpl41	7.37177	7.3919	7.25967	7.28747	7.27226	7.31256	7.08637	7.32319
Pa2g4	5.64353	5.65141	5.64953	5.68769	5.73437	5.65543	5.60972	5.71
Erbb3	5.87115	5.83443	5.9155	5.63967	5.8782	5.88816	5.75674	5.92702
Rps26	6.63209	6.70783	6.61484	6.66923	6.6584	6.66645	6.58005	6.62397
Ikzf4	0.46032	0.817193	0.181728	-0.346784	0.224642	0.400298	0.466133	0.352023
Suox	4.06379	4.01411	3.92614	4.26378	4.08545	4.1022	3.95701	3.64731
Rab5b	7.73566	7.82686	7.71622	7.84684	7.82684	7.71484	7.7906	7.72575
Cdk2	2.09983	2.10061	2.23088	1.76914	1.92233	1.72393	2.37989	2.09606
Pmel	1.17899	0.454922	0.8331	1.07644	0.833324	0.556069	1.07429	0.851801
Dgka	4.2065	3.94249	4.30722	4.0776	4.23272	4.22443	4.4964	4.35747
Wibg	3.13504	3.25867	3.43009	3.4294	3.33733	3.38084	3.36343	3.23302
Mmp19	2.80906	2.42354	2.87735	2.39381	2.92171	2.8291	2.55963	2.60284
Tmem198b	3.7295	3.36064	3.67151	3.35097	3.69931	3.50772	3.76124	3.49665
Dnajc14	6.43282	6.4878	6.47452	6.4189	6.42425	6.47207	6.39753	6.31356
Ormdl2	4.7194	4.84514	4.79261	4.74921	4.74769	4.93003	4.76927	4.41075
Sarnp	3.79775	4.05147	3.91793	3.84788	4.00231	3.94579	3.8192	4.15262
Gdf11	3.98504	4.19578	4.2297	4.10271	4.15539	4.19564	3.8431	3.99744
Cd63	6.05996	5.91615	5.84956	5.93892	5.80016	5.768	5.73363	5.87039
Rdh5	3.36416	3.54724	3.2939	3.30844	3.11793	3.16458	3.60225	3.3284
Bloc1s1	4.97486	4.94166	4.89136	5.02352	4.85324	4.88799	4.75134	5.04916
Itga7	7.40352	7.39526	7.39435	7.41611	7.45947	7.44441	7.3606	7.54879
Mettl7b	-0.877766	-0.806226	-1.4839	-1.59813	-0.930917	-1.57845	-0.936882	-0.794429
Mir684-1	-2.96139	-1.29036	-2.00207	-2.75737	-0.930917	-2.33611	-1.89056	-2.38851
Neurod4	-3.46452	-3.59432	-2.13247	-4.88315	-2.82405	-4.88315	-2.30525	-4.88315
Vmn2r84	-2.58907	-2.22961	-2.81843	-2.06432	-2.82405	-2.23975	-1.89056	-4.88315
Vmn2r87	-0.981629	-1.61116	-1.39937	-2.75737	-2.67534	-1.70143	-1.43142	-2.62222
Pisd-ps1	5.9706	5.84756	6.13734	5.7205	5.93317	6.01534	6.55598	6.47721
Sfi1	4.09763	3.88952	4.08681	3.60998	4.03641	4.1924	4.63977	4.17675
Eif4enif1	5.52773	5.53449	5.55603	5.58726	5.56295	5.49752	5.51724	5.49796
Drg1	5.98918	6.11724	6.00692	6.10057	6.01686	6.07716	5.94837	5.86686
Patz1	4.57242	4.47391	4.54579	4.53606	4.4668	4.54075	4.59119	4.38731
Gm11944	0.518585	0.171422	0.362072	0.313089	0.280344	0.259017	0.448433	1.1591
Pik3ip1	6.46682	6.46748	6.49434	6.53803	6.34864	6.4324	6.54431	6.51713
Limk2	7.23402	7.23245	7.32033	7.22508	7.1842	7.22214	7.24968	7.34996
Rnf185	4.92367	5.0126	4.8314	4.93058	4.8563	4.94484	4.82177	4.72152
8430429K09Rik	2.12505	2.14382	2.03214	2.28327	2.09276	1.75933	2.00326	1.68643
Pla2g3	4.43547	4.83281	4.76197	4.59578	4.84249	4.87996	4.60124	4.62629
Inpp5j	6.24965	6.24647	6.19115	6.255	6.12635	6.19902	6.16874	6.29872
Selm	6.35634	6.43984	6.31713	6.46804	6.30818	6.35567	6.25844	6.29741
Smtn	6.30035	6.01548	6.16926	6.00649	6.42245	6.3576	6.03245	6.46584
Tug1	6.03564	5.97155	5.95518	5.79882	6.00416	6.01137	5.94798	6.0403
Morc2a	4.88911	4.90288	5.12961	4.95518	5.02408	5.05876	5.06548	5.14602
Osbp2	4.85748	4.92705	4.86169	4.80794	4.90805	4.8953	5.06983	4.9366
4921536K21Rik	-0.780881	-0.54373	-0.265027	0.259136	0.224642	-0.505958	-0.53366	-0.143949
Dusp18	3.82494	3.95468	3.93635	3.80616	4.10743	3.94065	3.53885	4.02048
Slc35e4	4.74097	4.82785	4.93067	4.96258	4.77703	4.82949	4.78698	4.88733
Tcn2	5.23009	5.16983	5.13847	5.20748	5.2196	5.23888	5.05456	5.07384
Pes1	5.36655	5.45469	5.49798	5.47415	5.44451	5.46303	5.29944	5.22471
Gal3st1	4.79206	4.56018	4.55509	4.46337	4.68027	4.63749	4.1985	4.36449
Mtfp1	3.39818	3.57711	3.58337	3.29844	3.45697	3.50076	3.48344	3.42939
Sec14l2	4.64615	4.57012	4.59169	4.52468	4.48271	4.54075	4.5199	4.57275
Rnf215	4.93441	4.72932	4.83249	4.77106	4.94011	4.82393	4.97952	4.85138
Mir3060	-2.16556	-3.59432	-1.88248	-2.20891	-1.92208	-2.94737	-0.891095	-3.06403
Ccdc157	5.38102	5.29612	5.45463	5.25993	5.39596	5.32313	5.47743	5.57648
Sf3a1	6.12275	6.23901	6.1658	6.14866	6.13109	6.14147	6.15993	6.07586
Tbc1d10a	4.83664	4.78669	4.74582	4.66743	4.72278	4.68276	4.85406	4.6755
Gatsl3	2.23918	1.85618	1.78359	2.08044	2.16852	2.24063	2.3892	1.99631
Lif	-0.177189	-0.613985	-0.648365	-0.346784	0.0433381	-0.653368	-0.498904	-0.475168
Hormad2	-2.16556	-2.46904	-3.05663	-2.5505	-3.95341	-1.83588	-2.71981	-3.06403
Mtmr3	6.7255	6.75954	6.77717	6.76368	6.73557	6.71742	6.79837	6.74704
Ascc2	4.20355	3.96977	4.19273	4.00775	4.04448	4.06259	4.17044	3.91243
Uqcr10	5.73187	5.77425	5.63269	5.62708	5.65494	5.74094	5.53569	5.69019
Zmat5	4.55513	4.37196	4.47197	4.56831	4.47974	4.42792	4.4964	4.49722
Cabp7	3.98504	3.96073	4.07208	3.97255	3.94314	3.94194	4.0871	4.21164
Nf2	6.64223	6.71703	6.68549	6.61924	6.66518	6.63859	6.73157	6.63355
Nipsnap1	6.24391	6.26951	6.28035	6.36923	6.21686	6.25642	6.19053	6.21244
Mir6918	-3.46452	-2.46904	-1.77204	-1.70132	-3.17725	-2.67113	-2.08306	-4.00118
Thoc5	4.89737	4.8759	4.81711	4.85189	4.82386	4.82741	4.80187	4.85494
Nefh	11.8211	11.6948	11.7155	11.7185	11.7792	11.7327	11.6514	11.7362
Ap1b1	9.40781	9.35821	9.26859	9.42162	9.41811	9.37945	9.35441	9.27412
Gas2l1	6.69687	6.76647	6.66937	6.74233	6.82022	6.74325	6.66032	6.54982
Rasl10a	1.29466	1.2118	1.47196	0.928736	1.56676	1.53935	1.22744	0.851801
Ewsr1	6.70473	6.48597	6.68821	6.56503	6.66909	6.62026	6.82026	6.79291
Rhbdd3	3.73565	3.66131	3.63439	3.63931	3.50062	3.43294	3.61619	3.73037
Emid1	4.39845	3.92556	3.84182	3.8862	3.91995	3.91864	3.72678	4.00516
Kremen1	5.03265	4.97495	5.09633	5.17142	5.03154	5.09675	5.12867	5.04042
Znrf3	3.17181	2.85593	3.12222	3.03104	3.17537	2.93869	2.99411	3.11194
Xbp1	5.99945	6.03821	5.95417	6.02984	5.96539	5.95522	6.04649	5.83834
Ccdc117	3.93422	4.0865	3.89928	4.01183	3.89637	4.11706	4.08567	4.00002
Mrps24	4.48988	4.45258	4.3337	4.52325	4.59589	4.43888	4.25686	4.47145
Urgcp	6.29724	6.34552	6.29985	6.40771	6.31264	6.32622	6.16806	6.31434
2210015D19Rik	3.99876	4.12071	3.90552	3.89507	4.1379	4.22126	3.97567	3.91653
Dbnl	6.93142	6.99736	6.99585	7.03775	6.97453	6.95816	6.87883	6.9548
Pgam2	2.32332	2.27109	1.82811	2.033	2.30011	2.09579	2.10279	2.22505
Polm	2.76562	2.23657	2.92321	2.98193	2.69455	2.62349	2.91577	2.37557
Aebp1	5.75982	4.89263	5.27014	5.37617	5.38964	5.4962	6.42353	5.73382
Pold2	3.8981	4.10439	3.81995	4.06783	3.96029	3.7761	3.93494	3.73502
Gck	-0.828511	-0.41272	-0.46533	-0.226443	-0.214511	-0.450967	-1.13611	-0.312813
Ykt6	6.50245	6.51017	6.50911	6.56434	6.47089	6.48071	6.41899	6.51465
Camk2b	6.20007	6.13341	6.15623	6.20816	6.16447	6.09343	6.38595	6.38037
Nudcd3	6.46188	6.52327	6.45727	6.47693	6.50587	6.55689	6.53543	6.59101
Rps15a-ps6	-2.2934	-2.46904	-1.66947	-1.93291	-2.10031	-2.94737	-2.568	-4.88315
Npc1l1	-0.877766	-0.613985	-0.156965	0.174224	-1.31522	-0.684748	-0.936882	-1.06914
Ddx56	5.31816	5.4309	5.40407	5.5435	5.47169	5.52735	5.36282	5.39204
Tmed4	5.82139	5.87907	5.84144	5.85332	5.85431	5.86904	5.7975	5.71393
Ogdh	8.65768	8.71035	8.66809	8.69275	8.71152	8.65507	8.64231	8.62407
Zmiz2	7.552	7.56161	7.57481	7.55728	7.55584	7.54263	7.64316	7.52606
Ppia	9.24752	9.31986	9.26024	9.3126	9.2337	9.25189	9.16844	9.21886
H2afv	4.23864	4.21996	4.10139	4.0737	4.15415	3.94707	4.05968	4.20047
Purb	7.65151	7.57635	7.66745	7.61598	7.64717	7.75896	7.53804	7.636
Myo1g	0.556161	0.691757	1.22803	0.286365	1.24149	0.415175	1.62417	0.92958
Gm11974	-1.2149	-1.17966	-1.10346	-0.727563	-1.06333	-0.505958	-0.681714	-0.287446
Ccm2	5.67483	5.7841	5.61756	5.66906	5.59945	5.64993	5.62309	5.65586
Nacad	8.47647	8.49804	8.48345	8.57512	8.47645	8.46234	8.5015	8.40616
Tbrg4	5.40632	5.51405	5.4026	5.51501	5.53841	5.47417	5.4053	5.29567
Snora5c	-2.76325	-2.60552	-2.27585	-2.20891	-2.41726	-3.10824	-3.30383	-4.88315
Gm11978	-3.19113	-3.59432	-1.88248	-2.06432	-4.34464	-2.67113	-1.72076	-4.88315
Ramp3	0.518585	0.232755	0.0969563	0.556189	0.0217114	-0.0527341	0.808976	0.125246
Adcy1	6.90732	6.70197	6.8194	6.66112	6.76902	6.78734	6.7726	6.95314
Igfbp3	4.33501	4.3069	3.95854	4.1255	4.22446	4.21596	4.4964	4.07161
Tns3	7.04274	6.95324	7.02697	6.89109	7.06849	7.09365	6.95033	7.11676
Hus1	4.04574	4.05289	3.96254	4.01183	3.93449	4.07318	4.0553	4.04315
Sun3	-1.83858	-2.12331	-1.88248	-1.81247	-1.69026	-1.12671	-1.6428	-1.25333
Gm11992	1.22638	1.05083	1.04404	1.53947	1.00847	0.952608	1.21702	1.10266
Upp1	-0.0588514	-0.00614955	0.15402	0.203087	0.0646454	0.400298	-0.431809	0.33579
Abca13	-0.240208	-0.264098	-0.2281	-0.524647	-0.348911	-0.137031	0.217144	0.0476349
Vwc2	2.69579	2.99813	2.61819	2.59776	2.70137	2.77822	2.70461	2.27273
Zpbp	0.944087	1.14955	1.28023	1.13752	1.15473	1.16993	1.07429	0.918722
4930415F15Rik	-1.65563	-2.12331	-1.77204	-1.41155	-1.69026	-1.83588	-1.24709	-1.20503
Ikzf1	1.93846	1.82996	2.17684	2.24908	2.23581	2.23645	2.61621	1.58019
Fignl1	0.480004	0.521975	0.455831	0.439753	0.619616	0.487341	0.393993	0.180832
Ddc	-0.00313432	0.212599	-1.31951	0.556189	0.106339	-0.226561	0.0859231	0.144014
Grb10	5.43181	5.3116	5.33712	5.16043	5.43022	5.36252	5.44209	5.37377
Cobl	6.56052	6.57056	6.51525	6.59732	6.55845	6.47496	6.62284	6.66921
Vstm2a	4.59064	4.78498	4.57612	4.65965	4.71942	4.74444	4.58209	4.80349
Sec61g	3.5125	3.56524	3.61166	3.75591	3.50647	3.57385	3.36343	3.63906
Egfr	3.43898	2.73749	2.28936	2.60319	2.95347	2.55798	3.34202	2.83423
Eldr	-2.76325	-2.92464	-2.61405	-1.93291	-2.00845	-2.94737	-3.88738	-4.88315
Fbxo48	-1.57218	-0.935206	-2.13247	-0.727563	-1.2612	-0.925888	-0.498904	-1.20503
Plek	3.18086	3.31174	3.54121	3.26803	3.28609	3.27268	3.64755	3.44461
Cnrip1	5.39145	5.30209	5.3052	5.40674	5.37798	5.41666	5.24473	5.45587
Ppp3r1	8.09943	8.18829	8.12415	8.17934	8.10235	8.16783	8.08887	8.04631
Pno1	4.76122	4.9363	4.79598	4.84504	4.90658	4.88865	4.72125	4.64371
Wdr92	2.93207	3.33057	2.97164	3.03907	2.84682	3.08076	3.1718	2.74792
C1d	5.15555	5.19637	5.2117	5.28293	5.07878	5.14607	5.17447	5.33448
Etaa1	3.5125	3.74964	3.39501	3.45362	3.38469	3.60662	3.52414	3.36885
Etaa1os	-2.2934	-3.33501	-2.27585	-1.81247	-2.19842	-1.63863	-0.936882	-2.18743
Meis1	2.61797	2.49621	2.08445	2.43088	2.14371	2.2196	2.43035	2.44153
Spred2	6.29654	6.2477	6.33072	6.29451	6.36564	6.38052	6.3372	6.0568
Actr2	8.25239	8.28292	8.24747	8.27844	8.27174	8.29994	8.22431	8.27016
Rab1	7.83156	7.86872	7.84134	7.91029	7.81961	7.87524	7.7546	7.78897
Cep68	4.75719	4.76263	4.79374	4.75653	4.67682	4.73779	4.70178	4.70897
Slc1a4	6.29342	6.33915	6.35906	6.37201	6.39669	6.40681	6.32603	6.23066
Sertad2	5.88229	5.91147	5.94561	5.96021	5.8782	5.90769	5.8926	5.86262
Aftph	5.98359	6.01839	6.02997	6.01821	5.96043	6.02082	6.03504	6.04374
Lgalsl	5.21622	5.30745	5.3052	5.35864	5.39491	5.35386	5.31539	5.35577
Peli1	4.34444	4.4472	4.52971	4.34048	4.57191	4.51163	4.44935	4.36948
Vps54	5.01504	4.96369	4.8574	4.82776	4.93216	5.00569	5.04943	5.07872
Ugp2	6.71099	6.76604	6.64967	6.7166	6.70367	6.75755	6.70083	6.6789
Mdh1	8.65606	8.69323	8.63927	8.69926	8.62441	8.65276	8.64953	8.70218
Wdpcp	3.02209	3.14361	3.17487	2.99023	2.942	2.93095	3.15825	3.26552
Ehbp1	6.40863	6.2949	6.33805	6.35443	6.35541	6.43011	6.40099	6.33464
Tmem17	2.6574	2.76543	2.33942	2.68731	2.71827	2.28989	2.14186	2.03704
B3gnt2	5.9084	6.08018	6.01849	6.16663	6.07871	6.01961	6.13109	5.99062
Commd1	4.28273	4.27202	4.21804	4.30264	4.18366	4.0802	4.13353	4.27367
Zrsr1	6.35	6.31926	6.27995	6.38781	6.28596	6.28176	6.33268	6.33439
Cct4	6.81709	6.93086	6.83339	6.89552	6.87213	6.853	6.80143	6.78658
Fam161a	2.25069	2.32372	1.93779	1.96722	2.44526	2.32969	2.43486	1.8208
Xpo1	6.67649	6.50111	6.60847	6.52094	6.48281	6.55501	6.64559	6.64244
Usp34	7.53945	7.42977	7.53156	7.48714	7.6012	7.58898	7.52847	7.55942
Ahsa2	6.15678	6.18184	6.17444	6.15236	6.20671	6.14594	6.10803	6.20128
1700093K21Rik	-3.19113	-3.91068	-2.27585	-2.5505	-3.17725	-2.43938	-3.88738	-0.905824
Gm12060	-3.46452	-2.46904	-3.34208	-2.20891	-3.95341	-1.90811	-3.88738	-3.45781
0610010F05Rik	6.53015	6.60019	6.60144	6.59868	6.61979	6.65612	6.53883	6.45648
Pex13	5.12306	5.20469	5.28538	5.01846	5.01317	5.08807	5.08423	4.94197
Pus10	3.46638	3.23887	3.64189	3.1507	3.51036	3.36943	3.55341	3.52377
Rel	0.628498	0.790245	1.07392	1.06075	1.19393	1.32764	0.780965	1.17744
Papolg	3.74178	3.74087	3.92204	3.87504	3.84342	3.91733	3.75945	3.65059
Bcl11a	2.4634	2.75502	2.45179	2.7955	2.45336	2.51028	2.68585	2.86284
4933430M04Rik	-2.96139	-4.31648	-3.34208	-3.28925	-3.95341	-1.70143	-3.30383	-1.85378
5730522E02Rik	-1.15295	-0.806226	-0.302924	-0.727563	-1.37134	-1.31029	-0.218868	-1.02655
[truncated: 15,329 more rows]

## Sheet: c. DEGs day1 vs day0
GeneID	logFC	logCPM	F	PValue	FDR
Ifit3	1.7423	4.514	219.252	7.8273e-10	3.39079e-06
Ifit1	1.68217	5.23063	268.798	6.22615e-10	3.39079e-06
Isg15	2.04006	2.86056	202.837	6.38593e-10	3.39079e-06
Oasl2	1.02517	5.99121	213.218	4.60445e-10	3.39079e-06
Ifit3b	1.81386	3.12761	157.277	3.54208e-09	1.22754e-05
Rtp4	1.67683	3.01733	133.365	1.0565e-08	3.05117e-05
Stat2	0.688968	6.50569	123.616	1.73774e-08	4.30165e-05
Tap1	1.42486	4.02341	119.962	2.20348e-08	4.77275e-05
Lgals3bp	0.606238	6.33118	106.048	4.69282e-08	9.03524e-05
Irf7	1.6363	3.46048	106.489	5.31292e-08	9.20623e-05
Ddx58	0.732682	5.20277	98.4561	7.5491e-08	0.000118919
Rsad2	1.39599	3.66661	91.7762	1.21403e-07	0.00016182
Gbp7	0.979493	4.52571	92.4791	1.12346e-07	0.00016182
Irgm1	1.33784	3.57631	80.3878	2.76245e-07	0.000319119
Parp9	1.0581	3.41208	80.7278	2.63307e-07	0.000319119
Eif2ak2	0.579407	5.19864	77.4295	3.40893e-07	0.000369188
Iigp1	1.61163	2.94289	75.5836	4.14196e-07	0.000422187
Tap2	0.654348	5.04204	70.0222	6.31137e-07	0.000607575
Gbp3	1.36828	3.91973	77.5217	9.11259e-07	0.000831068
Zbp1	2.09946	1.2288	62.7053	1.22692e-06	0.001063
Stat1	0.934222	6.41264	104.157	1.53342e-06	0.00126529
Usp18	1.42393	2.54466	59.3925	1.69354e-06	0.00133389
Ddx60	1.33589	2.3957	57.7106	2.00599e-06	0.00151129
H2-T23	1.10397	4.02867	58.9051	3.54671e-06	0.00256073
Parp12	0.80451	4.25656	49.9152	4.65189e-06	0.00322432
Mx1	2.56027	0.430167	47.6123	6.08451e-06	0.0040551
Ly6a	0.981002	3.62735	46.3061	7.18849e-06	0.00461341
Ly6e	0.579707	5.80852	48.2172	1.01329e-05	0.00576855
Parp14	0.784584	4.47764	45.9235	9.42983e-06	0.00576855
Cd74	0.324469	7.11645	43.323	1.032e-05	0.00576855
Ptgir	0.368656	6.18993	43.4664	1.01329e-05	0.00576855
Ifitm3	0.603766	5.03537	41.5948	1.45081e-05	0.00785614
Ifi47	1.37367	2.35175	39.5921	1.70706e-05	0.00896362
Gbp4	1.60822	2.41355	42.1475	2.06378e-05	0.0102593
Zc3hav1	0.633527	4.34635	38.1238	2.07223e-05	0.0102593
Slfn5	0.800278	3.75269	37.7577	2.18225e-05	0.0105039
Ifih1	0.861235	3.58166	35.7928	2.91063e-05	0.0136312
Bst2	0.981014	3.69978	38.5698	3.07437e-05	0.0140191
Xaf1	0.911884	3.55901	35.6993	3.25478e-05	0.0144613
Samhd1	0.418106	5.49077	34.6241	3.4522e-05	0.0149549
Psmb9	1.11944	2.21482	34.1943	3.68502e-05	0.0155742
Herc6	0.964277	2.89859	33.845	3.88744e-05	0.0160385
Ifit2	0.427539	5.29141	33.6322	4.01694e-05	0.0161873
Siglec1	1.32397	1.72525	33.2654	4.25186e-05	0.0167446
Trim30a	1.12077	2.08462	32.2411	4.99539e-05	0.0192356
H2-Eb1	0.340522	5.58589	31.2788	5.8316e-05	0.0219674
Igtp	1.19959	4.79247	55.565	6.49805e-05	0.0239571
Znfx1	0.233528	7.28005	30.2115	6.95135e-05	0.0250944
Gbp5	1.23438	2.63083	30.7754	9.08711e-05	0.032135
Myh1	-1.46712	1.74314	28.5124	9.33885e-05	0.0323647
Lum	-0.493824	5.7356	31.1288	9.60709e-05	0.0326415
Gm6548	0.58451	3.58476	27.8903	0.000103448	0.0344128
Uba7	0.970743	3.49501	30.4868	0.000105256	0.0344128
Trim25	0.5582	5.45814	31.4579	0.000116199	0.0367444
Tifa	0.473297	4.42045	27.2151	0.000116629	0.0367444
Timeless	0.431429	4.64083	26.9808	0.000121641	0.0369788
Tapbp	0.243635	6.78796	27.0569	0.000119985	0.0369788
Ifi44	1.2432	1.70696	26.4254	0.000134535	0.0401935
Marcks	-0.264765	7.02485	26.2745	0.000138302	0.0406186
Dtx3l	0.569213	4.36666	26.1061	0.000143059	0.0413154

## Sheet: d. DEGs day3 vs day0
GeneID	logFC	logCPM	F	PValue	FDR
Oasl2	0.664712	5.99121	90.9704	1.25627e-07	0.00217686
Ptgir	0.484195	6.18993	76.3596	3.71431e-07	0.00321808
Nptx1	0.334965	8.20889	60.945	1.45352e-06	0.00629663
Pfkfb3	0.409306	6.79426	60.963	1.45096e-06	0.00629663
Snta1	0.559743	4.93828	58.139	1.9206e-06	0.00665347
Otud7b	0.368773	6.41598	53.648	3.07178e-06	0.00665347
Pappa	0.816768	4.05062	53.7306	3.04452e-06	0.00665347
Ptchd2	0.441421	6.05076	55.9474	2.40607e-06	0.00665347
Fam107a	1.23076	4.93347	85.2912	3.75519e-06	0.00723
Paqr8	0.35872	6.41113	48.2246	5.65975e-06	0.00794468
Etv5	0.474698	6.81069	52.0882	5.96035e-06	0.00794468
Ifit1	0.757337	5.23063	55.4985	5.49305e-06	0.00794468
Cx3cr1	-1.02161	3.04821	49.7245	4.75468e-06	0.00794468
Tsc22d3	0.439806	7.44556	48.6407	1.07081e-05	0.0132536
Sgk1	0.698073	5.07784	46.2762	1.38191e-05	0.0151894
Ngfr	0.295679	9.84915	41.0401	1.40253e-05	0.0151894
Ptpn9	0.366093	6.78081	40.0787	1.58175e-05	0.0161227
Bdnf	0.608307	5.25605	42.6215	1.74341e-05	0.0167832
Fstl3	0.701991	3.59071	35.7672	2.9104e-05	0.0236761
Myh1	-1.60606	1.74314	35.4804	3.06066e-05	0.0236761
Pvalb	-0.32626	6.11214	35.2499	3.14261e-05	0.0236761
Cacna2d1	0.233671	7.93959	35.3009	3.11881e-05	0.0236761
Calca	0.323235	9.80946	38.9611	2.87902e-05	0.0236761
Arrb1	0.23963	8.71537	34.7899	3.36692e-05	0.0243092
Hif3a	2.57952	1.86441	47.5534	3.65318e-05	0.0253209
Slc7a5	0.336469	6.36643	32.557	4.75137e-05	0.031666
Zfp91Cntf	0.34813	6.45885	31.7527	5.40138e-05	0.0346649
Ly6c1	0.644267	4.31979	31.0861	6.097e-05	0.0377317
Galnt16	0.395345	5.10479	28.7592	8.89139e-05	0.0466879
Loxl4	0.900279	2.83734	28.8506	8.7525e-05	0.0466879
Plxna4	0.24797	7.17713	28.9489	8.6059e-05	0.0466879
Ccnd1	-0.321798	5.71539	29.1974	8.2476e-05	0.0466879
Vwa5a	0.228306	8.66776	29.2168	8.2204e-05	0.0466879
Lgals3bp	0.310966	6.33118	28.2363	9.73586e-05	0.0483631
Matn2	0.344892	6.96446	29.6686	9.76864e-05	0.0483631
Marcks	-0.271348	7.02485	27.9496	0.000102375	0.0492763
Unc13a	0.223321	7.64969	27.6181	0.000108546	0.0499235
Scn10a	0.220484	10.1446	27.5698	0.000109481	0.0499235

## Sheet: e. DEGS day30 vs day0
GeneID	logFC	logCPM	F	PValue	FDR
Itgb8	-0.721749	5.55312	77.1558	4.26169e-07	0.00738466
Apoe	-0.279923	11.0481	51.9155	3.71327e-06	0.0321717
Slc25a37	0.619251	4.48398	46.0573	7.33637e-06	0.0423749
Ncam2	-0.791758	4.49649	45.7448	1.0486e-05	0.0454255

## Sheet: f. node table Mm. painAssay
Node	Weight_1	Weight_2	Weight_3	Query_1	Query_2	Query_3
Fosb	0.00100041	0.00103803	0.00657096	FALSE	FALSE	FALSE
Dctn6	0.00100015	0.0010052	0.0160143	FALSE	FALSE	FALSE
Med27	0.00100012	0.00100593	0.00104044	FALSE	FALSE	FALSE
Kdm4a	0.00100009	0.00100616	0.00425424	FALSE	FALSE	FALSE
Rhno1	0.00100015	0.00100253	0.00940793	FALSE	FALSE	FALSE
Dyrk3	0.00100088	0.00101213	0.0029914	FALSE	FALSE	FALSE
Fnip1	0.00100031	0.0011065	0.0240891	FALSE	FALSE	FALSE
Isy1	0.00100011	0.00101128	0.00100071	FALSE	FALSE	FALSE
Grik4	0.00100004	0.00100428	0.00593748	FALSE	FALSE	FALSE
Ezh1	0.00100024	0.00100575	0.00568802	FALSE	FALSE	FALSE
Chfr	0.00100036	0.00173267	0.0315943	FALSE	FALSE	FALSE
Grip1	0.00100006	0.00100518	0.0018573	FALSE	FALSE	FALSE
Egf	0.00100019	0.00100275	0.0169522	FALSE	FALSE	FALSE
Senp7	0.00100013	0.00100314	0.00442401	FALSE	FALSE	FALSE
Ifih1	0.144837	0.0010003	0.0236699	TRUE	FALSE	FALSE
Rfc5	0.00100026	0.00101405	0.00783344	FALSE	FALSE	FALSE
Ttf1	0.00145417	0.00100183	0.00106767	FALSE	FALSE	FALSE
Sos2	0.00100006	0.00100614	0.00119903	FALSE	FALSE	FALSE
Ubr2	0.00100023	0.00530379	0.0410551	FALSE	FALSE	FALSE
Bad	0.00100005	0.00100596	0.00266139	FALSE	FALSE	FALSE
Glrx3	0.00100004	0.00100241	0.00641568	FALSE	FALSE	FALSE
Rhoc	0.00100012	0.00101015	0.00173183	FALSE	FALSE	FALSE
G3bp2	0.00100022	0.00116807	0.00152694	FALSE	FALSE	FALSE
P3h2	0.00100079	0.00100351	0.00133392	FALSE	FALSE	FALSE
Plin4	0.00100348	0.0297155	0.0515793	FALSE	FALSE	FALSE
Mnt	0.00100005	0.00100071	0.0020809	FALSE	FALSE	FALSE
Gosr1	0.00100004	0.00100111	0.00109627	FALSE	FALSE	FALSE
Gpn1	0.00100001	0.00100417	0.00706439	FALSE	FALSE	FALSE
Ncf4	0.00100033	0.001029	0.0199005	FALSE	FALSE	FALSE
Grk6	0.00100022	0.00176185	0.00436389	FALSE	FALSE	FALSE
Cotl1	0.00100016	0.014715	0.00463417	FALSE	FALSE	FALSE
Emp1	0.00100055	0.00669841	0.00168957	FALSE	FALSE	FALSE
Btbd3	0.00100001	0.00140886	0.00103022	FALSE	FALSE	FALSE
Rbx1	0.00100011	0.00100343	0.0131819	FALSE	FALSE	FALSE
Prep	0.00100012	0.00139219	0.0063331	FALSE	FALSE	FALSE
Hgs	0.00100017	0.0010049	0.00102408	FALSE	FALSE	FALSE
Itsn1	0.00126637	0.00100698	0.0010944	FALSE	FALSE	FALSE
Osmr	0.00100026	0.00356255	0.00929805	FALSE	FALSE	FALSE
Inf2	0.001	0.00136196	0.0022871	FALSE	FALSE	FALSE
Usf2	0.00100024	0.0010063	0.00127521	FALSE	FALSE	FALSE
Vrk2	0.00100058	0.00100102	0.00694184	FALSE	FALSE	FALSE
P4ha1	0.00100027	0.0010041	0.055487	FALSE	FALSE	FALSE
Mmgt1	0.00100004	0.00100549	0.00282024	FALSE	FALSE	FALSE
Lamb1	0.0010005	0.00100067	0.00273577	FALSE	FALSE	FALSE
Ap3d1	0.00100013	0.00100275	0.00142084	FALSE	FALSE	FALSE
Rgs19	0.0010005	0.00100173	0.00148294	FALSE	FALSE	FALSE
Tbx6	0.00100176	0.00100792	0.00291872	FALSE	FALSE	FALSE
Keap1	0.00100036	0.00100811	0.00100781	FALSE	FALSE	FALSE
Ganab	0.00100012	0.00100003	0.00371464	FALSE	FALSE	FALSE
As3mt	0.0010005	0.00134557	0.0392088	FALSE	FALSE	FALSE
Rasd1	0.00100087	0.00101104	0.0264567	FALSE	FALSE	FALSE
Efhd2	0.00100027	0.00100045	0.00230622	FALSE	FALSE	FALSE
Ing3	0.0010002	0.00100202	0.00276229	FALSE	FALSE	FALSE
Cfdp1	0.0010002	0.00123709	0.00142867	FALSE	FALSE	FALSE
Rel	0.00100104	0.0112988	0.0103334	FALSE	FALSE	FALSE
Taf2	0.00100019	0.00100187	0.00773658	FALSE	FALSE	FALSE
Pak3	0.00100015	0.00100757	0.00100013	FALSE	FALSE	FALSE
Ift20	0.00100008	0.0011929	0.0159347	FALSE	FALSE	FALSE
Rpp30	0.00100029	0.00100834	0.00394507	FALSE	FALSE	FALSE
Sgcb	0.001	0.00100595	0.00853269	FALSE	FALSE	FALSE
Lrfn2	0.0010007	0.00100982	0.00100596	FALSE	FALSE	FALSE
Zwint	0.00100017	0.00100195	0.00100183	FALSE	FALSE	FALSE
Pcgf2	0.001	0.00100211	0.0418196	FALSE	FALSE	FALSE
Msh2	0.00100032	0.00148477	0.00317927	FALSE	FALSE	FALSE
Chd1	0.00100025	0.00100768	0.00142198	FALSE	FALSE	FALSE
Nptn	0.00100015	0.00100405	0.00275659	FALSE	FALSE	FALSE
Gp1bb	0.00100011	0.00100339	0.00141151	FALSE	FALSE	FALSE
Brcc3	0.00100011	0.001005	0.00224554	FALSE	FALSE	FALSE
Hif3a	0.00100201	1	0.222969	FALSE	TRUE	FALSE
Cdk1	0.00100075	0.00102041	0.0646061	FALSE	FALSE	FALSE
Wdr5	0.00100033	0.00100246	0.0132565	FALSE	FALSE	FALSE
Klhl2	0.00100023	0.00100351	0.00702412	FALSE	FALSE	FALSE
Senp1	0.00100006	0.00100007	0.00728878	FALSE	FALSE	FALSE
Gipc2	0.00100168	0.00100216	0.00198493	FALSE	FALSE	FALSE
Cela1	0.00100044	0.00284121	0.00100414	FALSE	FALSE	FALSE
Vav3	0.00100034	0.00100365	0.00161559	FALSE	FALSE	FALSE
Adck1	0.00100015	0.00116729	0.00967026	FALSE	FALSE	FALSE
Unc5b	0.00100065	0.00100028	0.0012497	FALSE	FALSE	FALSE
Wdr76	0.001001	0.0183871	0.0414873	FALSE	FALSE	FALSE
Fhl3	0.0031721	0.0303749	0.00385761	FALSE	FALSE	FALSE
Pde12	0.00100019	0.0018919	0.00790575	FALSE	FALSE	FALSE
Rpap1	0.00100018	0.00100145	0.00380947	FALSE	FALSE	FALSE
Fzr1	0.00100002	0.00100019	0.00114737	FALSE	FALSE	FALSE
Vapa	0.00100007	0.00100291	0.0134115	FALSE	FALSE	FALSE
Zw10	0.00100025	0.00101271	0.00133101	FALSE	FALSE	FALSE
Stk26	0.00100007	0.00100508	0.00414221	FALSE	FALSE	FALSE
Map1a	0.0010002	0.00270892	0.0278525	FALSE	FALSE	FALSE
Actn2	0.00100287	0.00674484	0.0101161	FALSE	FALSE	FALSE
Dcaf8	0.00100013	0.00100501	0.00101101	FALSE	FALSE	FALSE
Rcor1	0.00100002	0.00100751	0.00103055	FALSE	FALSE	FALSE
Dctn4	0.00100018	0.00100279	0.00127601	FALSE	FALSE	FALSE
Cd79a	0.00100053	0.00101098	0.00930777	FALSE	FALSE	FALSE
Znfx1	0.0344606	0.00265773	0.00105787	TRUE	FALSE	FALSE
Noc3l	0.00126011	0.0255205	0.011734	FALSE	FALSE	FALSE
Snx9	0.00100002	0.00100408	0.00392544	FALSE	FALSE	FALSE
Ash2l	0.00100012	0.00362598	0.00321365	FALSE	FALSE	FALSE
Naa25	0.00100019	0.00100344	0.00378753	FALSE	FALSE	FALSE
Zfhx3	0.00100007	0.00113298	0.00266035	FALSE	FALSE	FALSE
Ninl	0.00100021	0.00100304	0.00419591	FALSE	FALSE	FALSE
Myo1d	0.00100027	0.00244199	0.0257526	FALSE	FALSE	FALSE
Syt7	0.00100019	0.00100054	0.00691976	FALSE	FALSE	FALSE
Taf4b	0.00100008	0.00101103	0.00348769	FALSE	FALSE	FALSE
Cenpk	0.00100043	0.00102334	0.00737573	FALSE	FALSE	FALSE
Ifrd1	0.00100038	0.00167872	0.00180969	FALSE	FALSE	FALSE
Prpf3	0.00100013	0.00123715	0.00110148	FALSE	FALSE	FALSE
Sobp	0.00100003	0.00128115	0.00150733	FALSE	FALSE	FALSE
Tfec	0.00100094	0.00102849	0.00538193	FALSE	FALSE	FALSE
Gpr37	0.00100037	0.00169919	0.00818242	FALSE	FALSE	FALSE
Dgke	0.00100019	0.00100665	0.00135399	FALSE	FALSE	FALSE
Lsm11	0.00100015	0.00100296	0.0048851	FALSE	FALSE	FALSE
Mak	0.00100036	0.00103291	0.0593417	FALSE	FALSE	FALSE
Tle1	0.00100009	0.00126174	0.00142475	FALSE	FALSE	FALSE
Ikzf5	0.00100008	0.00100429	0.0010703	FALSE	FALSE	FALSE
Cbl	0.0010004	0.0022145	0.00105144	FALSE	FALSE	FALSE
Nab2	0.00876896	0.00100318	0.0249261	FALSE	FALSE	FALSE
Atf2	0.00100025	0.00100336	0.00113393	FALSE	FALSE	FALSE
Plcb2	0.00100095	0.00104155	0.029029	FALSE	FALSE	FALSE
Ptpra	0.00100004	0.00100044	0.012292	FALSE	FALSE	FALSE
Gstm5	0.00100005	0.00190255	0.00353686	FALSE	FALSE	FALSE
Tlr4	0.0010005	0.00364794	0.00350109	FALSE	FALSE	FALSE
Btla	0.00100186	0.00100658	0.00227031	FALSE	FALSE	FALSE
Raf1	0.00100017	0.00100375	0.00463937	FALSE	FALSE	FALSE
Fst	0.00100103	0.00100424	0.0238774	FALSE	FALSE	FALSE
Pon1	0.00100147	0.0126135	0.0600307	FALSE	FALSE	FALSE
Cbwd1	0.00100045	0.00100005	0.00443542	FALSE	FALSE	FALSE
Iws1	0.00100023	0.00100095	0.016178	FALSE	FALSE	FALSE
Sufu	0.00100039	0.00100909	0.00725695	FALSE	FALSE	FALSE
Cpne7	0.00100124	0.00656292	0.00928097	FALSE	FALSE	FALSE
Hyou1	0.0010001	0.00100014	0.0011984	FALSE	FALSE	FALSE
Vti1a	0.00100007	0.00100656	0.00376517	FALSE	FALSE	FALSE
Cntn1	0.00100004	0.0010376	0.00129808	FALSE	FALSE	FALSE
Gipc1	0.00100026	0.00100429	0.0010039	FALSE	FALSE	FALSE
Inmt	0.0010014	0.00101817	0.036365	FALSE	FALSE	FALSE
Psmg2	0.00100017	0.00100174	0.00198815	FALSE	FALSE	FALSE
Ssh1	0.00100038	0.00100515	0.00130968	FALSE	FALSE	FALSE
Ap1b1	0.0010001	0.00100159	0.00416931	FALSE	FALSE	FALSE
Tanc1	0.0010003	0.00273985	0.0020222	FALSE	FALSE	FALSE
Yap1	0.00100045	0.00238262	0.00231548	FALSE	FALSE	FALSE
Ddx17	0.00100018	0.00101094	0.0138945	FALSE	FALSE	FALSE
Ncam1	0.00100004	0.00100056	0.0074937	FALSE	FALSE	FALSE
Rhob	0.0010001	0.00966454	0.0019854	FALSE	FALSE	FALSE
Gpc3	0.00100078	0.00193915	0.00260339	FALSE	FALSE	FALSE
C1ql4	0.00100005	0.00949059	0.00107629	FALSE	FALSE	FALSE
Abcf3	0.00100003	0.001003	0.00117017	FALSE	FALSE	FALSE
Tcaf2	0.00100025	0.00101401	0.0112521	FALSE	FALSE	FALSE
Rab13	0.0010007	0.00101253	0.00131448	FALSE	FALSE	FALSE
Shb	0.00100116	0.00101223	0.00101039	FALSE	FALSE	FALSE
Tgfb2	0.00100031	0.00100565	0.0142909	FALSE	FALSE	FALSE
Tmed2	0.00100026	0.00100777	0.00181535	FALSE	FALSE	FALSE
Kcmf1	0.00100023	0.00100403	0.00734647	FALSE	FALSE	FALSE
Ppil3	0.00100007	0.00100158	0.00553502	FALSE	FALSE	FALSE
Jak3	0.00100036	0.00100105	0.0192567	FALSE	FALSE	FALSE
Pde1b	0.0010006	0.00101574	0.0011448	FALSE	FALSE	FALSE
Rcor3	0.00100045	0.00100471	0.00985164	FALSE	FALSE	FALSE
Gna13	0.00100002	0.00100369	0.00220038	FALSE	FALSE	FALSE
Cnot7	0.0010001	0.00100203	0.00241185	FALSE	FALSE	FALSE
Tulp3	0.00100024	0.00100354	0.00206021	FALSE	FALSE	FALSE
Tet2	0.00100041	0.00100191	0.00124382	FALSE	FALSE	FALSE
Paip1	0.00100007	0.0010063	0.00994157	FALSE	FALSE	FALSE
Dll1	0.00100012	0.00101491	0.00100637	FALSE	FALSE	FALSE
Hipk1	0.00100018	0.00136391	0.00145588	FALSE	FALSE	FALSE
Lin7b	0.00100012	0.00100729	0.0108416	FALSE	FALSE	FALSE
Hmox1	0.00100016	0.00100713	0.0193747	FALSE	FALSE	FALSE
Porcn	0.00100002	0.00100318	0.00538481	FALSE	FALSE	FALSE
Pitx3	0.00100112	0.00105654	0.00605196	FALSE	FALSE	FALSE
Aph1b	0.00100007	0.00155707	0.0013988	FALSE	FALSE	FALSE
Gpm6a	0.00330386	0.00100118	0.0119486	FALSE	FALSE	FALSE
Atad2	0.00100007	0.00100843	0.00100298	FALSE	FALSE	FALSE
Noxo1	0.00100059	0.00101929	0.0052882	FALSE	FALSE	FALSE
Fzd1	0.00100016	0.00100266	0.00104969	FALSE	FALSE	FALSE
Rab10	0.00100013	0.00100026	0.00448902	FALSE	FALSE	FALSE
Gli3	0.00100137	0.00102233	0.00163533	FALSE	FALSE	FALSE
Rbp2	0.00100116	0.00100698	0.00149289	FALSE	FALSE	FALSE
Lats2	0.00100027	0.00100542	0.00690681	FALSE	FALSE	FALSE
Tead1	0.00100055	0.00100465	0.00100307	FALSE	FALSE	FALSE
Mef2a	0.00100005	0.00100215	0.00402828	FALSE	FALSE	FALSE
Sf3b3	0.00100015	0.0010047	0.00245312	FALSE	FALSE	FALSE
Ccdc8	0.00100029	0.00100297	0.00103555	FALSE	FALSE	FALSE
Rere	0.00100025	0.00239809	0.0518803	FALSE	FALSE	FALSE
Tiam2	0.00100064	0.00178586	0.00585866	FALSE	FALSE	FALSE
Strbp	0.00100015	0.0010043	0.0220523	FALSE	FALSE	FALSE
Sgip1	0.00100002	0.00100557	0.00151056	FALSE	FALSE	FALSE
Mcm4	0.00100037	0.00175672	0.00264046	FALSE	FALSE	FALSE
Ptprs	0.00100025	0.00100051	0.00115352	FALSE	FALSE	FALSE
Cd2	0.00100164	0.00105731	0.0010192	FALSE	FALSE	FALSE
Clspn	0.00100117	0.00100948	0.0946335	FALSE	FALSE	FALSE
Ptprf	0.00100003	0.00163685	0.00122388	FALSE	FALSE	FALSE
Tifa	0.0617978	0.0858563	0.00234391	TRUE	FALSE	FALSE
Sntb2	0.00100031	0.00100901	0.006274	FALSE	FALSE	FALSE
Siah2	0.00100008	0.00167143	0.00550553	FALSE	FALSE	FALSE
Ccng2	0.00100008	0.00100682	0.00248349	FALSE	FALSE	FALSE
Nfil3	0.00100021	0.00100918	0.00694048	FALSE	FALSE	FALSE
Rtn2	0.00100013	0.00100575	0.00429923	FALSE	FALSE	FALSE
Cenpi	0.00100057	0.00101099	0.0571337	FALSE	FALSE	FALSE
Rit1	0.00100004	0.00100238	0.0186599	FALSE	FALSE	FALSE
Ncf1	0.00100085	0.0157958	0.0869262	FALSE	FALSE	FALSE
Atp5j	0.00100017	0.00100184	0.00194761	FALSE	FALSE	FALSE
Hcls1	0.0010004	0.00100371	0.00327623	FALSE	FALSE	FALSE
Rdh13	0.00100003	0.00100674	0.00170387	FALSE	FALSE	FALSE
Otud4	0.00100017	0.00118189	0.0012763	FALSE	FALSE	FALSE
Dctn5	0.00100006	0.00100174	0.00109311	FALSE	FALSE	FALSE
Myrf	0.00100081	0.00100088	0.0154687	FALSE	FALSE	FALSE
Api5	0.0010002	0.00100148	0.00176247	FALSE	FALSE	FALSE
Cyld	0.00100029	0.00100311	0.00100448	FALSE	FALSE	FALSE
Mbnl1	0.00100007	0.00100071	0.00241333	FALSE	FALSE	FALSE
Stag1	0.00100018	0.0010021	0.00810404	FALSE	FALSE	FALSE
Zfp54	0.00100034	0.0010157	0.00106332	FALSE	FALSE	FALSE
Tln1	0.00100015	0.00198883	0.0147854	FALSE	FALSE	FALSE
Pkd2	0.0010002	0.0010017	0.0193464	FALSE	FALSE	FALSE
Sept5	0.00100002	0.00100042	0.00484011	FALSE	FALSE	FALSE
Rac2	0.0142117	0.0479737	0.126866	FALSE	FALSE	FALSE
Morc3	0.00100005	0.001003	0.00583403	FALSE	FALSE	FALSE
Nbn	0.00100008	0.00230172	0.00585827	FALSE	FALSE	FALSE
Lsg1	0.00100024	0.00100266	0.00136686	FALSE	FALSE	FALSE
Usp9x	0.00100017	0.00344451	0.00107136	FALSE	FALSE	FALSE
Ercc3	0.00100018	0.00100206	0.00143012	FALSE	FALSE	FALSE
Avil	0.00100016	0.00218026	0.00814696	FALSE	FALSE	FALSE
Hhatl	0.00100019	0.00100184	0.00631202	FALSE	FALSE	FALSE
Lmo3	0.0010003	0.00102435	0.00110178	FALSE	FALSE	FALSE
Pax6	0.00100092	0.00239964	0.0466194	FALSE	FALSE	FALSE
Flcn	0.00100007	0.00100844	0.023883	FALSE	FALSE	FALSE
Ccm2	0.00100025	0.0018976	0.00559258	FALSE	FALSE	FALSE
Dgcr8	0.00100047	0.0181737	0.0397343	FALSE	FALSE	FALSE
Senp2	0.00100003	0.00100489	0.00234306	FALSE	FALSE	FALSE
Syk	0.00100019	0.00101377	0.0617947	FALSE	FALSE	FALSE
Gmcl1	0.00100007	0.00100058	0.00352525	FALSE	FALSE	FALSE
Hint1	0.00100003	0.00100482	0.00138571	FALSE	FALSE	FALSE
Dym	0.00100016	0.00110083	0.00315942	FALSE	FALSE	FALSE
Sgcg	0.00100882	0.00111202	0.0185861	FALSE	FALSE	FALSE
Icam5	0.00100036	0.00100365	0.00383551	FALSE	FALSE	FALSE
Dact3	0.00100011	0.00150741	0.00100004	FALSE	FALSE	FALSE
Clgn	0.00100001	0.00100384	0.00272197	FALSE	FALSE	FALSE
Synj1	0.00100008	0.00100221	0.00983284	FALSE	FALSE	FALSE
Dhx30	0.00100012	0.0010038	0.00128849	FALSE	FALSE	FALSE
Plod3	0.00100027	0.0103733	0.015677	FALSE	FALSE	FALSE
Safb2	0.00100026	0.00131021	0.0543736	FALSE	FALSE	FALSE
Cd68	0.00100028	0.00102143	0.00843598	FALSE	FALSE	FALSE
Irak1	0.00100004	0.00100665	0.00108055	FALSE	FALSE	FALSE
Apex1	0.001	0.00100124	0.00261274	FALSE	FALSE	FALSE
Klc4	0.00100016	0.00100893	0.0115115	FALSE	FALSE	FALSE
Ulk1	0.00100002	0.00100149	0.00185878	FALSE	FALSE	FALSE
Mkks	0.00100014	0.00261659	0.00958354	FALSE	FALSE	FALSE
Ap3s1	0.00100007	0.0010028	0.0147362	FALSE	FALSE	FALSE
Cirbp	0.00100012	0.00100046	0.0164977	FALSE	FALSE	FALSE
Runx2	0.0010003	0.00816675	0.0132722	FALSE	FALSE	FALSE
Crlf1	0.00100084	0.0010042	0.00101354	FALSE	FALSE	FALSE
Srrm1	0.00100014	0.00100607	0.024414	FALSE	FALSE	FALSE
Ddx41	0.00100017	0.00100691	0.00320877	FALSE	FALSE	FALSE
Ptprk	0.00100019	0.0010048	0.0101594	FALSE	FALSE	FALSE
Kcnh1	0.00100008	0.00100296	0.00100208	FALSE	FALSE	FALSE
Nphp1	0.00100058	0.001007	0.00189676	FALSE	FALSE	FALSE
Stx12	0.00100014	0.00100184	0.00177222	FALSE	FALSE	FALSE
Nelfe	0.00100019	0.00100378	0.0119547	FALSE	FALSE	FALSE
Atrip	0.00100011	0.00100417	0.00662489	FALSE	FALSE	FALSE
Pbx3	0.00100033	0.00100491	0.0215266	FALSE	FALSE	FALSE
Mier2	0.00100018	0.001006	0.00106172	FALSE	FALSE	FALSE
Bax	0.0010003	0.0010106	0.00449617	FALSE	FALSE	FALSE
Tll1	0.00100053	0.00100299	0.0153283	FALSE	FALSE	FALSE
Psme3	0.00100007	0.0010025	0.00133856	FALSE	FALSE	FALSE
Cenpm	0.0010011	0.00100231	0.00278397	FALSE	FALSE	FALSE
Trib3	0.00100058	0.00101094	0.0183856	FALSE	FALSE	FALSE
Bid	0.00100052	0.00365792	0.00159154	FALSE	FALSE	FALSE
Rtn4r	0.00100019	0.00100686	0.0142346	FALSE	FALSE	FALSE
Hnf1b	0.0010006	0.00101519	0.00671732	FALSE	FALSE	FALSE
Ccnd1	0.00644621	0.104883	0.0138192	FALSE	TRUE	FALSE
Ddx4	0.00100044	0.00102309	0.00277786	FALSE	FALSE	FALSE
Ift57	0.00100001	0.00100526	0.00473405	FALSE	FALSE	FALSE
Cd22	0.001001	0.00103387	0.0105507	FALSE	FALSE	FALSE
Rptor	0.00100002	0.00100467	0.0041444	FALSE	FALSE	FALSE
Pdpn	0.00100042	0.0398682	0.0362143	FALSE	FALSE	FALSE
Lmo4	0.00100021	0.00100418	0.00141554	FALSE	FALSE	FALSE
Egfl7	0.00100043	0.0010027	0.0209477	FALSE	FALSE	FALSE
Mlkl	0.0288082	0.00836352	0.0511413	FALSE	FALSE	FALSE
Ift27	0.00100012	0.00100334	0.00112673	FALSE	FALSE	FALSE
Sf3b4	0.00100008	0.00100308	0.011857	FALSE	FALSE	FALSE
Gmppb	0.00100062	0.00228442	0.00100233	FALSE	FALSE	FALSE
Pkd1	0.00100029	0.00205951	0.0273535	FALSE	FALSE	FALSE
Rbm10	0.00100021	0.00100789	0.00135736	FALSE	FALSE	FALSE
Gfi1b	0.00100475	0.00105295	0.114792	FALSE	FALSE	FALSE
Foxo4	0.00100013	0.00100858	0.00526235	FALSE	FALSE	FALSE
Tlk2	0.00100007	0.0010031	0.00132118	FALSE	FALSE	FALSE
Il23a	0.00100428	0.0368083	1	FALSE	FALSE	FALSE
Psip1	0.00100012	0.00100063	0.00750295	FALSE	FALSE	FALSE
Dok6	0.0010008	0.00100031	0.0256946	FALSE	FALSE	FALSE
Kcna1	0.00100019	0.00100604	0.00146992	FALSE	FALSE	FALSE
Myo1b	0.001	0.00202247	0.0102765	FALSE	FALSE	FALSE
Pds5b	0.00100014	0.00228765	0.00587875	FALSE	FALSE	FALSE
Fgf1	0.00100015	0.0010917	0.00107034	FALSE	FALSE	FALSE
Dgat1	0.00100016	0.00100276	0.0240437	FALSE	FALSE	FALSE
Shoc2	0.00100004	0.00100156	0.0079227	FALSE	FALSE	FALSE
Eps8	0.00100058	0.00100476	0.00100801	FALSE	FALSE	FALSE
Psmd9	0.00100015	0.00100833	0.0149078	FALSE	FALSE	FALSE
Rufy2	0.001	0.00100539	0.00219352	FALSE	FALSE	FALSE
Lemd2	0.00100008	0.0010046	0.00104819	FALSE	FALSE	FALSE
Lrp1	0.00100009	0.00101218	0.00700075	FALSE	FALSE	FALSE
Hgh1	0.00100006	0.00138825	0.0314138	FALSE	FALSE	FALSE
Dmxl2	0.00100012	0.00130014	0.00604924	FALSE	FALSE	FALSE
Myef2	0.00100023	0.00118884	0.00109191	FALSE	FALSE	FALSE
Cdca5	0.00100145	0.00107201	0.164933	FALSE	FALSE	FALSE
Spdef	0.00100024	0.00100836	0.0120323	FALSE	FALSE	FALSE
Crlf2	0.00100024	0.00100104	0.0110136	FALSE	FALSE	FALSE
Clcc1	0.00100066	0.00101084	0.00649485	FALSE	FALSE	FALSE
Arl10	0.00100031	0.00192951	0.0010123	FALSE	FALSE	FALSE
Kcnd1	0.00100024	0.00428412	0.00140427	FALSE	FALSE	FALSE
Rev1	0.00100017	0.00101341	0.00110505	FALSE	FALSE	FALSE
Atg2a	0.00100022	0.00379355	0.00115551	FALSE	FALSE	FALSE
Cmc2	0.00100011	0.00100722	0.00147419	FALSE	FALSE	FALSE
Efnb2	0.00220771	0.00197776	0.0010713	FALSE	FALSE	FALSE
Evi5	0.00100023	0.00100417	0.00163437	FALSE	FALSE	FALSE
Rab9b	0.00100005	0.00367251	0.00720503	FALSE	FALSE	FALSE
Birc6	0.00100034	0.00176968	0.00861484	FALSE	FALSE	FALSE
Svip	0.00100012	0.00100479	0.00205478	FALSE	FALSE	FALSE
Ddb2	0.00100008	0.00100259	0.002889	FALSE	FALSE	FALSE
Dhx36	0.00100022	0.00100216	0.00117272	FALSE	FALSE	FALSE
Taf7	0.00100003	0.00100595	0.00113029	FALSE	FALSE	FALSE
Phf1	0.00100006	0.00100117	0.0233302	FALSE	FALSE	FALSE
Traf6	0.00100007	0.00100219	0.00255534	FALSE	FALSE	FALSE
Il1a	0.00100053	0.00100433	0.0137723	FALSE	FALSE	FALSE
Kdm1b	0.00100007	0.00100039	0.00101806	FALSE	FALSE	FALSE
Lax1	0.00100288	0.00101743	0.0140763	FALSE	FALSE	FALSE
Myo7a	0.0010001	0.00345992	0.00109059	FALSE	FALSE	FALSE
Ghr	0.00100008	0.00148938	0.0076289	FALSE	FALSE	FALSE
Sytl2	0.00100001	0.00100224	0.00109185	FALSE	FALSE	FALSE
E2f4	0.00100002	0.00100188	0.00127904	FALSE	FALSE	FALSE
Chkb	0.00100018	0.00100716	0.00563198	FALSE	FALSE	FALSE
Esam	0.00100027	0.00319472	0.00752452	FALSE	FALSE	FALSE
Lad1	0.00100136	0.00100659	0.0115065	FALSE	FALSE	FALSE
Trim9	0.00100004	0.0214243	0.00109081	FALSE	FALSE	FALSE
Myl6b	0.00100013	0.00100688	0.00203941	FALSE	FALSE	FALSE
Mark3	0.00100009	0.00203639	0.00217495	FALSE	FALSE	FALSE
Exog	0.00100028	0.0010012	0.00260479	FALSE	FALSE	FALSE
Copa	0.00100001	0.00100307	0.00130925	FALSE	FALSE	FALSE
Aldh2	0.00100034	0.00100145	0.00102503	FALSE	FALSE	FALSE
Tph2	0.00100017	0.00102684	0.00706697	FALSE	FALSE	FALSE
Ube3b	0.00100008	0.00100017	0.00619757	FALSE	FALSE	FALSE
Rrp8	0.0010001	0.00100088	0.0168428	FALSE	FALSE	FALSE
Casp6	0.00100028	0.00100642	0.0135329	FALSE	FALSE	FALSE
Rfx8	0.00100003	0.00103017	0.00946684	FALSE	FALSE	FALSE
Sbds	0.00100003	0.00100025	0.00403732	FALSE	FALSE	FALSE
Asxl2	0.00100029	0.001012	0.0277708	FALSE	FALSE	FALSE
Grb10	0.00100035	0.00100244	0.00140367	FALSE	FALSE	FALSE
Glmn	0.00100011	0.00126403	0.00326452	FALSE	FALSE	FALSE
Ylpm1	0.00100007	0.00209564	0.0320016	FALSE	FALSE	FALSE
Psmd3	0.00100018	0.00100072	0.00118702	FALSE	FALSE	FALSE
Klf4	0.00100018	0.0013907	0.0168866	FALSE	FALSE	FALSE
Upk1b	0.00100273	0.00104685	0.0763034	FALSE	FALSE	FALSE
Rala	0.00100002	0.00100163	0.00300139	FALSE	FALSE	FALSE
Chodl	0.00100051	0.00102391	0.00101969	FALSE	FALSE	FALSE
Derl1	0.00100002	0.00100246	0.00761564	FALSE	FALSE	FALSE
Cdc42	0.00100009	0.00100452	0.0159426	FALSE	FALSE	FALSE
Amfr	0.00100006	0.00100099	0.00106059	FALSE	FALSE	FALSE
Ttc4	0.00100027	0.00100867	0.00420892	FALSE	FALSE	FALSE
Edf1	0.00100005	0.00100582	0.0165926	FALSE	FALSE	FALSE
Uba5	0.00100013	0.0010005	0.00581041	FALSE	FALSE	FALSE
Syne1	0.00100019	0.0012019	0.0257673	FALSE	FALSE	FALSE
Dolk	0.00100001	0.00132498	0.0304757	FALSE	FALSE	FALSE
Amer2	0.00100005	0.00100299	0.00107569	FALSE	FALSE	FALSE
Cbln1	0.00100015	0.00357097	0.0252062	FALSE	FALSE	FALSE
Sdc3	0.00100026	0.00953314	0.0173977	FALSE	FALSE	FALSE
Diexf	0.00100004	0.0010017	0.00169337	FALSE	FALSE	FALSE
Ssna1	0.00100016	0.00100816	0.00343385	FALSE	FALSE	FALSE
Pkp4	0.00100017	0.00100621	0.0019993	FALSE	FALSE	FALSE
Ntpcr	0.00100045	0.00100427	0.00120296	FALSE	FALSE	FALSE
Ly9	0.00100023	0.0010233	0.00771567	FALSE	FALSE	FALSE
Abr	0.00100027	0.00123842	0.0015927	FALSE	FALSE	FALSE
Cblb	0.00100009	0.00100795	0.00104314	FALSE	FALSE	FALSE
Ufc1	0.00100023	0.00100658	0.00741267	FALSE	FALSE	FALSE
Dkkl1	0.00100183	0.00104817	0.0343457	FALSE	FALSE	FALSE
Hfe	0.00100038	0.00466525	0.0570288	FALSE	FALSE	FALSE
Gata4	0.00100368	0.00340609	0.0607581	FALSE	FALSE	FALSE
Psmd4	0.00100003	0.00100522	0.00181692	FALSE	FALSE	FALSE
Trpm7	0.00100003	0.00100315	0.00426887	FALSE	FALSE	FALSE
Sin3a	0.00100032	0.00100463	0.00100595	FALSE	FALSE	FALSE
Ctcfl	0.00100044	0.00104306	0.00427447	FALSE	FALSE	FALSE
Morn2	0.00100031	0.00180175	0.0114548	FALSE	FALSE	FALSE
Agfg1	0.00100007	0.00100242	0.0103427	FALSE	FALSE	FALSE
Plod1	0.00100033	0.00338962	0.0338393	FALSE	FALSE	FALSE
Gnb5	0.00100009	0.00100542	0.00423262	FALSE	FALSE	FALSE
Il2rg	0.00100159	0.00102143	0.00999462	FALSE	FALSE	FALSE
Cdc5l	0.00100002	0.00100627	0.00284576	FALSE	FALSE	FALSE
Glmp	0.00100021	0.00100717	0.0105518	FALSE	FALSE	FALSE
Akap3	0.00100066	0.00104407	0.00405714	FALSE	FALSE	FALSE
Fabp5	0.00100004	0.00100454	0.00292025	FALSE	FALSE	FALSE
E4f1	0.00100023	0.00100008	0.0101077	FALSE	FALSE	FALSE
Rbm4	0.00100027	0.00100216	0.00144639	FALSE	FALSE	FALSE
Ckap4	0.001	0.00100334	0.0107034	FALSE	FALSE	FALSE
Barx2	0.00100007	0.00101839	0.00116011	FALSE	FALSE	FALSE
Pkn1	0.00100014	0.00100669	0.0095466	FALSE	FALSE	FALSE
Tapt1	0.00100008	0.00100855	0.0079749	FALSE	FALSE	FALSE
Rag1	0.00100085	0.00592678	0.00695865	FALSE	FALSE	FALSE
Larp1	0.00100014	0.00397411	0.00100118	FALSE	FALSE	FALSE
Reep3	0.0010004	0.00100748	0.00544471	FALSE	FALSE	FALSE
Tinf2	0.00100025	0.00100212	0.00253272	FALSE	FALSE	FALSE
Clip3	0.00100004	0.00331597	0.00271932	FALSE	FALSE	FALSE
Sun3	0.00100043	0.00106761	0.0153093	FALSE	FALSE	FALSE
Myh14	0.00100006	0.00100729	0.0127299	FALSE	FALSE	FALSE
Btg3	0.00100006	0.00102433	0.0106986	FALSE	FALSE	FALSE
Blmh	0.00100005	0.0010029	0.00501669	FALSE	FALSE	FALSE
Hspb2	0.0010006	0.00100979	0.0030129	FALSE	FALSE	FALSE
Pdk3	0.00100011	0.00100438	0.00554435	FALSE	FALSE	FALSE
Med7	0.00100008	0.00100632	0.00115764	FALSE	FALSE	FALSE
Cer1	0.00100113	0.00101382	0.00176999	FALSE	FALSE	FALSE
Tanc2	0.00100011	0.00100571	0.011004	FALSE	FALSE	FALSE
Six6	0.00100023	0.00102779	0.00102057	FALSE	FALSE	FALSE
Wnt6	0.00100048	0.00101277	0.00810631	FALSE	FALSE	FALSE
Rbpms	0.00100031	0.00216662	0.00743094	FALSE	FALSE	FALSE
Fem1b	0.00100001	0.00100061	0.0010011	FALSE	FALSE	FALSE
Top2a	0.00100151	0.00105177	0.0455107	FALSE	FALSE	FALSE
Arpc2	0.00100012	0.0010016	0.00100924	FALSE	FALSE	FALSE
Palm3	0.00100012	0.00111656	0.00274384	FALSE	FALSE	FALSE
Wnk1	0.00100005	0.00100325	0.00350131	FALSE	FALSE	FALSE
Txlna	0.00100026	0.00100613	0.00110331	FALSE	FALSE	FALSE
Akap9	0.00100005	0.00114507	0.00206302	FALSE	FALSE	FALSE
Trnp1	0.00100005	0.00100216	0.00547525	FALSE	FALSE	FALSE
Xpa	0.00100003	0.00100181	0.00621594	FALSE	FALSE	FALSE
Rims3	0.00100023	0.00210881	0.00112328	FALSE	FALSE	FALSE
Itm2c	0.00100002	0.00100377	0.00225563	FALSE	FALSE	FALSE
Pcgf1	0.00100046	0.00100792	0.033828	FALSE	FALSE	FALSE
Gsk3b	0.00100005	0.00159962	0.00299115	FALSE	FALSE	FALSE
Gpt	0.00100103	0.00100125	0.0228626	FALSE	FALSE	FALSE
Cryab	0.00100055	0.00100007	0.029417	FALSE	FALSE	FALSE
Acd	0.00100024	0.00100781	0.00100025	FALSE	FALSE	FALSE
Lsp1	0.00100079	0.00353472	0.0572896	FALSE	FALSE	FALSE
Dkk3	0.00100017	0.0056721	0.00106318	FALSE	FALSE	FALSE
Sdk2	0.00100026	0.001004	0.00382636	FALSE	FALSE	FALSE
Npas1	0.00100013	0.00102042	0.0113365	FALSE	FALSE	FALSE
Acvr1	0.00100004	0.00100093	0.00529033	FALSE	FALSE	FALSE
Ddi2	0.001	0.00100505	0.00135225	FALSE	FALSE	FALSE
Kif15	0.00100017	0.00101451	0.102571	FALSE	FALSE	FALSE
Sumf1	0.0010002	0.0010067	0.00159635	FALSE	FALSE	FALSE
Cpsf6	0.00100032	0.00100071	0.00117517	FALSE	FALSE	FALSE
Cnot1	0.00100003	0.00100084	0.00219787	FALSE	FALSE	FALSE
Cd33	0.00100118	0.00101747	0.0113843	FALSE	FALSE	FALSE
Wdr3	0.00100052	0.00100618	0.0024349	FALSE	FALSE	FALSE
Actb	0.001	0.00100341	0.00863522	FALSE	FALSE	FALSE
Gfpt2	0.00100147	0.00100495	0.00239826	FALSE	FALSE	FALSE
Rora	0.00100042	0.00348599	0.00127116	FALSE	FALSE	FALSE
Dgka	0.00100034	0.00125358	0.0462139	FALSE	FALSE	FALSE
Ddx18	0.00100033	0.00121098	0.00112354	FALSE	FALSE	FALSE
Lmnb1	0.00100005	0.00101225	0.00128103	FALSE	FALSE	FALSE
Erf	0.00100021	0.00100094	0.021325	FALSE	FALSE	FALSE
Rragd	0.00100004	0.00100234	0.00102253	FALSE	FALSE	FALSE
Kcnc1	0.001	0.00290619	0.00542268	FALSE	FALSE	FALSE
Kank2	0.00100005	0.00162081	0.0194712	FALSE	FALSE	FALSE
Btg2	0.00100083	0.00101403	0.0019704	FALSE	FALSE	FALSE
Hes5	0.00100069	0.00602387	0.115854	FALSE	FALSE	FALSE
Ephb1	0.00100051	0.00135364	0.00371575	FALSE	FALSE	FALSE
Pcgf5	0.00100062	0.00100359	0.00103169	FALSE	FALSE	FALSE
Gmeb1	0.00100033	0.00100012	0.00115305	FALSE	FALSE	FALSE
Naf1	0.00100038	0.00125078	0.0118156	FALSE	FALSE	FALSE
Smyd2	0.00100009	0.00100629	0.0245205	FALSE	FALSE	FALSE
Akt2	0.00100022	0.00187983	0.00191693	FALSE	FALSE	FALSE
Pias2	0.00100017	0.00158875	0.0215069	FALSE	FALSE	FALSE
Sgcz	0.00100036	0.00100089	0.00198575	FALSE	FALSE	FALSE
Mafa	0.00100024	0.00100262	0.00101012	FALSE	FALSE	FALSE
Capg	0.0010006	0.00180553	0.00226825	FALSE	FALSE	FALSE
Dnal1	0.00100029	0.00100139	0.00148837	FALSE	FALSE	FALSE
Gpx4	0.00100028	0.00137583	0.0135861	FALSE	FALSE	FALSE
Psmg3	0.00100034	0.00100177	0.00121181	FALSE	FALSE	FALSE
Il3ra	0.00100149	0.00267645	0.0534855	FALSE	FALSE	FALSE
Wdr91	0.00100028	0.00100283	0.00284797	FALSE	FALSE	FALSE
Rcor2	0.00100025	0.00101285	0.0134867	FALSE	FALSE	FALSE
Cdc6	0.00100194	0.00100748	0.0115091	FALSE	FALSE	FALSE
Tacc2	0.00100002	0.00100247	0.00668374	FALSE	FALSE	FALSE
Bmp4	0.0010005	0.0031653	0.0244658	FALSE	FALSE	FALSE
Pcgf6	0.00100022	0.00100101	0.00184375	FALSE	FALSE	FALSE
Prdm1	0.00100046	0.00102322	0.00734483	FALSE	FALSE	FALSE
Tiprl	0.0010002	0.00100182	0.0014886	FALSE	FALSE	FALSE
Hic1	0.00100008	0.00100088	0.144633	FALSE	FALSE	FALSE
Nrip1	0.00100014	0.00305613	0.010523	FALSE	FALSE	FALSE
Pum2	0.00100006	0.0010002	0.00140468	FALSE	FALSE	FALSE
Dmbx1	0.00100166	0.00103822	0.0033228	FALSE	FALSE	FALSE
Trpv2	0.00100003	0.00100222	0.00225595	FALSE	FALSE	FALSE
Ptk7	0.00100002	0.00114127	0.00103858	FALSE	FALSE	FALSE
Ebpl	0.00100018	0.00100393	0.00115668	FALSE	FALSE	FALSE
Pml	0.0319221	0.00119207	0.00302734	FALSE	FALSE	FALSE
Loxl4	0.00149922	0.29163	0.00100045	FALSE	TRUE	FALSE
Rtkn	0.0010001	0.00100606	0.00272395	FALSE	FALSE	FALSE
Cpt2	0.00100005	0.00100664	0.0131929	FALSE	FALSE	FALSE
Sash3	0.00135898	0.013653	0.0158213	FALSE	FALSE	FALSE
Ddx6	0.00100004	0.00100212	0.00100005	FALSE	FALSE	FALSE
Unc5c	0.00100049	0.00100978	0.018143	FALSE	FALSE	FALSE
Snrpa	0.00100025	0.00249201	0.0162429	FALSE	FALSE	FALSE
Ide	0.0010002	0.00163382	0.019671	FALSE	FALSE	FALSE
Hace1	0.00100047	0.00100128	0.00212552	FALSE	FALSE	FALSE
Taok1	0.00100001	0.00321683	0.00132248	FALSE	FALSE	FALSE
Epm2a	0.00100004	0.00100039	0.00599584	FALSE	FALSE	FALSE
Akip1	0.00100073	0.00100137	0.00580731	FALSE	FALSE	FALSE
Anxa2	0.00100006	0.00100387	0.00825721	FALSE	FALSE	FALSE
Vamp5	0.00100058	0.00142724	0.00792303	FALSE	FALSE	FALSE
Itk	0.00100143	0.00102961	0.00152993	FALSE	FALSE	FALSE
Ascc2	0.00100004	0.00100372	0.00138629	FALSE	FALSE	FALSE
Clic1	0.00100016	0.00100033	0.021166	FALSE	FALSE	FALSE
Vps18	0.00100011	0.00100204	0.00112401	FALSE	FALSE	FALSE
Celf1	0.0010001	0.00100087	0.00352674	FALSE	FALSE	FALSE
Gps2	0.00100033	0.00100349	0.00350727	FALSE	FALSE	FALSE
Ptgr2	0.00100003	0.0037367	0.00121696	FALSE	FALSE	FALSE
Sesn3	0.00100003	0.00100922	0.00994818	FALSE	FALSE	FALSE
Lamp2	0.00100012	0.00447684	0.00327237	FALSE	FALSE	FALSE
Limd1	0.00100046	0.00100416	0.00127659	FALSE	FALSE	FALSE
Zmym2	0.00100025	0.0010028	0.00102782	FALSE	FALSE	FALSE
Nlrp3	0.00100174	0.00103229	0.0929973	FALSE	FALSE	FALSE
Hook3	0.00100006	0.00100338	0.00920837	FALSE	FALSE	FALSE
Adrb2	0.00100065	0.00496862	0.0645875	FALSE	FALSE	FALSE
Orc3	0.00100005	0.00100247	0.00100043	FALSE	FALSE	FALSE
Lama1	0.00100067	0.00101472	0.00103897	FALSE	FALSE	FALSE
Kif1b	0.00100009	0.00188147	0.00794827	FALSE	FALSE	FALSE
Cenpp	0.00100015	0.00102918	0.0155386	FALSE	FALSE	FALSE
Als2	0.00100008	0.00100417	0.0012426	FALSE	FALSE	FALSE
Acsl1	0.00100004	0.00100472	0.00101211	FALSE	FALSE	FALSE
Rock2	0.00100016	0.00100222	0.00177048	FALSE	FALSE	FALSE
Kdm6a	0.00100021	0.00100571	0.00202424	FALSE	FALSE	FALSE
Lepr	0.00100067	0.00101975	0.00714547	FALSE	FALSE	FALSE
Zgpat	0.00100044	0.00100978	0.00606255	FALSE	FALSE	FALSE
Eif3h	0.00100013	0.00100555	0.00144118	FALSE	FALSE	FALSE
Pacs2	0.00100031	0.00128541	0.00519095	FALSE	FALSE	FALSE
Fancg	0.00100038	0.00100257	0.00135797	FALSE	FALSE	FALSE
Pja1	0.00100001	0.00100049	0.0047346	FALSE	FALSE	FALSE
Ubfd1	0.00100003	0.00100394	0.00874232	FALSE	FALSE	FALSE
Podn	0.00100053	0.00101726	0.0138047	FALSE	FALSE	FALSE
Fzd2	0.00100019	0.0010064	0.00366828	FALSE	FALSE	FALSE
Jdp2	0.00100043	0.00100109	0.00105975	FALSE	FALSE	FALSE
Xrcc1	0.00100031	0.00100867	0.0032228	FALSE	FALSE	FALSE
Hdac2	0.00100008	0.00100035	0.00452383	FALSE	FALSE	FALSE
Hvcn1	0.00100058	0.00100767	0.0250005	FALSE	FALSE	FALSE
Lcp2	0.00100028	0.0010074	0.00271845	FALSE	FALSE	FALSE
Rsad2	0.474797	0.00194712	0.0256199	TRUE	FALSE	FALSE
Atf4	0.00100029	0.00100064	0.00108937	FALSE	FALSE	FALSE
Syce1	0.00100077	0.00109185	0.0279699	FALSE	FALSE	FALSE
Kcnq1	0.00100049	0.00101471	0.0539219	FALSE	FALSE	FALSE
Thada	0.00100021	0.00100082	0.00461617	FALSE	FALSE	FALSE
Stk40	0.00100011	0.00100614	0.00123986	FALSE	FALSE	FALSE
Bag1	0.00100024	0.00100272	0.00179337	FALSE	FALSE	FALSE
Kcna4	0.00100011	0.00100029	0.00334643	FALSE	FALSE	FALSE
Phf12	0.00100008	0.00100626	0.0119153	FALSE	FALSE	FALSE
Cul1	0.00100006	0.00100128	0.00381456	FALSE	FALSE	FALSE
Btbd9	0.00100011	0.00100464	0.00153338	FALSE	FALSE	FALSE
Asb4	0.00100201	0.00104917	0.0886331	FALSE	FALSE	FALSE
Socs3	0.00100072	0.00101488	0.00731958	FALSE	FALSE	FALSE
Sdhb	0.00100004	0.0010062	0.00201343	FALSE	FALSE	FALSE
Peli1	0.00100012	0.00170743	0.00103508	FALSE	FALSE	FALSE
Fbxl2	0.00100014	0.00100497	0.00186471	FALSE	FALSE	FALSE
Loxl1	0.00100074	0.00101613	0.00751684	FALSE	FALSE	FALSE
Elk1	0.00100009	0.00100569	0.0124624	FALSE	FALSE	FALSE
Ctbp1	0.00100002	0.00100276	0.00357279	FALSE	FALSE	FALSE
Bean1	0.00100012	0.00100711	0.00278845	FALSE	FALSE	FALSE
Mylip	0.00100049	0.00241564	0.029961	FALSE	FALSE	FALSE
Usf1	0.00100024	0.00100477	0.00428294	FALSE	FALSE	FALSE
Tle6	0.00100054	0.00102081	0.0102522	FALSE	FALSE	FALSE
Ell2	0.00100029	0.00100328	0.0142434	FALSE	FALSE	FALSE
Gli1	0.00100045	0.00100785	0.0122982	FALSE	FALSE	FALSE
Mast1	0.00100001	0.00120524	0.00146973	FALSE	FALSE	FALSE
Pkp1	0.0010001	0.00100323	0.00109715	FALSE	FALSE	FALSE
Fto	0.00100008	0.00100376	0.00310996	FALSE	FALSE	FALSE
Mocs3	0.00100019	0.00143463	0.00413677	FALSE	FALSE	FALSE
Fbll1	0.00100002	0.0010124	0.0102619	FALSE	FALSE	FALSE
Eya1	0.00100107	0.00104278	0.014635	FALSE	FALSE	FALSE
Phip	0.00100037	0.00161878	0.0280603	FALSE	FALSE	FALSE
Nacc1	0.00100008	0.00100364	0.00121522	FALSE	FALSE	FALSE
Cby1	0.00100061	0.00100736	0.00101377	FALSE	FALSE	FALSE
Ncor2	0.00100034	0.00614125	0.00189802	FALSE	FALSE	FALSE
Bcl6	0.00100039	0.00352853	0.00132581	FALSE	FALSE	FALSE
Stmn1	0.00100011	0.00348896	0.0358698	FALSE	FALSE	FALSE
Dsn1	0.00100017	0.00100166	0.00110106	FALSE	FALSE	FALSE
Myl1	0.00100417	0.00105648	0.027764	FALSE	FALSE	FALSE
Lhx3	0.00100261	0.00110337	0.00191004	FALSE	FALSE	FALSE
Plrg1	0.0010002	0.0010038	0.00169735	FALSE	FALSE	FALSE
Haus7	0.00100006	0.00101688	0.00555794	FALSE	FALSE	FALSE
Pcgf3	0.00100005	0.00100302	0.00347221	FALSE	FALSE	FALSE
Arl1	0.00100003	0.0010026	0.0039965	FALSE	FALSE	FALSE
Ptprg	0.00100008	0.00540767	0.00984726	FALSE	FALSE	FALSE
Kcnd2	0.00100021	0.00100047	0.0202505	FALSE	FALSE	FALSE
Epha2	0.0010007	0.00100434	0.00167661	FALSE	FALSE	FALSE
Bag4	0.00100005	0.00100159	0.00448138	FALSE	FALSE	FALSE
Gcc2	0.0010001	0.00100165	0.00102561	FALSE	FALSE	FALSE
Cbx7	0.00100002	0.00254822	0.00128569	FALSE	FALSE	FALSE
Ypel2	0.00100054	0.00463819	0.00105706	FALSE	FALSE	FALSE
Ccny	0.00100017	0.00100687	0.00925084	FALSE	FALSE	FALSE
Ctxn1	0.00100004	0.00100801	0.00133795	FALSE	FALSE	FALSE
Hps6	0.0010005	0.00886289	0.00184802	FALSE	FALSE	FALSE
Ift80	0.00100004	0.00100338	0.0019143	FALSE	FALSE	FALSE
Bfsp1	0.00100001	0.00100691	0.019333	FALSE	FALSE	FALSE
Dlx1	0.00100033	0.00104343	0.00100201	FALSE	FALSE	FALSE
Vill	0.00100054	0.00100884	0.0332381	FALSE	FALSE	FALSE
Cdc73	0.00100009	0.00101291	0.01071	FALSE	FALSE	FALSE
Ttll4	0.00100056	0.00101763	0.00166294	FALSE	FALSE	FALSE
Rfc2	0.00100003	0.0010062	0.00190004	FALSE	FALSE	FALSE
Vat1l	0.00100024	0.00100336	0.0248742	FALSE	FALSE	FALSE
Gfap	0.00100094	0.00103499	0.00266175	FALSE	FALSE	FALSE
Cidec	0.00100028	0.00106305	0.0330684	FALSE	FALSE	FALSE
Lmnb2	0.00100002	0.00100444	0.00104315	FALSE	FALSE	FALSE
Nradd	0.0010001	0.00100614	0.00100335	FALSE	FALSE	FALSE
Rbm4b	0.00100084	0.0010109	0.0130945	FALSE	FALSE	FALSE
Unc5d	0.00100027	0.00102028	0.0146288	FALSE	FALSE	FALSE
Hfm1	0.00100132	0.00250459	0.080193	FALSE	FALSE	FALSE
Nr1i3	0.00100037	0.00100414	0.0034991	FALSE	FALSE	FALSE
Kat6a	0.0010002	0.00100151	0.00114875	FALSE	FALSE	FALSE
Atn1	0.00100021	0.00133266	0.00477511	FALSE	FALSE	FALSE
Ykt6	0.00100009	0.00100309	0.00178642	FALSE	FALSE	FALSE
Hdx	0.00100074	0.00206468	0.00233877	FALSE	FALSE	FALSE
Mest	0.00100026	0.0464317	0.0161053	FALSE	FALSE	FALSE
Dysf	0.00100017	0.0020824	0.0072401	FALSE	FALSE	FALSE
Rgs6	0.00100029	0.0546638	0.00104705	FALSE	FALSE	FALSE
Fbf1	0.00100029	0.00119273	0.00102733	FALSE	FALSE	FALSE
Fgfr1	0.00100007	0.00100271	0.00141579	FALSE	FALSE	FALSE
Psma8	0.00100145	0.00107053	0.0049009	FALSE	FALSE	FALSE
Larp7	0.00100016	0.00100058	0.00255058	FALSE	FALSE	FALSE
Ddx21	0.00100017	0.00101102	0.00103609	FALSE	FALSE	FALSE
Dock1	0.00100041	0.00100056	0.00194989	FALSE	FALSE	FALSE
Cenpj	0.00100002	0.00100638	0.00104637	FALSE	FALSE	FALSE
Park7	0.00100017	0.0017679	0.00492638	FALSE	FALSE	FALSE
Gcdh	0.00100033	0.00242777	0.0164454	FALSE	FALSE	FALSE
Iffo2	0.00100014	0.00100091	0.00139522	FALSE	FALSE	FALSE
Espn	0.00100029	0.00100257	0.00817666	FALSE	FALSE	FALSE
Dcc	0.00100081	0.00102379	0.00586729	FALSE	FALSE	FALSE
Kmt2b	0.00100011	0.00100901	0.00603063	FALSE	FALSE	FALSE
Cdc16	0.00100022	0.00100005	0.00156165	FALSE	FALSE	FALSE
Tox	0.00100023	0.00102359	0.00986599	FALSE	FALSE	FALSE
Acly	0.00100007	0.00100398	0.00171903	FALSE	FALSE	FALSE
Cdk18	0.00100015	0.00157619	0.0042407	FALSE	FALSE	FALSE
Epn2	0.00100004	0.00100382	0.0021376	FALSE	FALSE	FALSE
Efr3b	0.0010001	0.00100537	0.00293983	FALSE	FALSE	FALSE
Nop56	0.00100015	0.00235547	0.0010018	FALSE	FALSE	FALSE
Gli2	0.00100072	0.00453814	0.0525924	FALSE	FALSE	FALSE
Dcaf5	0.00100009	0.00100349	0.00182605	FALSE	FALSE	FALSE
Ago1	0.00100003	0.00100846	0.00137998	FALSE	FALSE	FALSE
Cbr1	0.00100001	0.00100701	0.0104661	FALSE	FALSE	FALSE
Gsg1	0.0010012	0.00103086	0.00481555	FALSE	FALSE	FALSE
Nfic	0.00100022	0.00100085	0.00114471	FALSE	FALSE	FALSE
Fibp	0.00100031	0.00100115	0.00100493	FALSE	FALSE	FALSE
Grik5	0.00100015	0.00117698	0.00613848	FALSE	FALSE	FALSE
Rbl1	0.00100067	0.00101667	0.0115783	FALSE	FALSE	FALSE
Cdyl	0.00100041	0.00147909	0.00135008	FALSE	FALSE	FALSE
Gltp	0.00843137	0.0019553	0.0275422	FALSE	FALSE	FALSE
Rtp4	0.678887	0.00667341	0.00838898	TRUE	FALSE	FALSE
Tssk4	0.00100414	0.00103998	0.0155646	FALSE	FALSE	FALSE
Stx1a	0.00100021	0.00100353	0.0105082	FALSE	FALSE	FALSE
Ahsa1	0.00100019	0.00140009	0.0703254	FALSE	FALSE	FALSE
Plce1	0.00100017	0.0323035	0.0117383	FALSE	FALSE	FALSE
Kif3c	0.00100004	0.00100223	0.00150491	FALSE	FALSE	FALSE
Ap1m1	0.00100003	0.00100073	0.00221498	FALSE	FALSE	FALSE
Stat6	0.00100001	0.00100444	0.00127385	FALSE	FALSE	FALSE
Rdh5	0.00100046	0.0114351	0.00101728	FALSE	FALSE	FALSE
Rogdi	0.00100003	0.00100229	0.00152613	FALSE	FALSE	FALSE
Bex1	0.00100066	0.00100825	0.0237575	FALSE	FALSE	FALSE
Cubn	0.00100029	0.00102079	0.0108983	FALSE	FALSE	FALSE
Ptbp3	0.001	0.0010027	0.00179856	FALSE	FALSE	FALSE
Klf3	0.0010006	0.00101268	0.00100087	FALSE	FALSE	FALSE
Syn3	0.00100017	0.0015228	0.0140051	FALSE	FALSE	FALSE
Bzw1	0.00100014	0.00100366	0.00517017	FALSE	FALSE	FALSE
Sycp3	0.00100072	0.0010073	0.00450364	FALSE	FALSE	FALSE
Nek9	0.00100003	0.00100141	0.00102687	FALSE	FALSE	FALSE
Atad5	0.00100018	0.00102402	0.0327698	FALSE	FALSE	FALSE
Znrf3	0.00100016	0.00100409	0.00117503	FALSE	FALSE	FALSE
Mep1a	0.00100099	0.00104361	0.00179711	FALSE	FALSE	FALSE
Mlc1	0.00100007	0.00118083	0.0126797	FALSE	FALSE	FALSE
Adrm1	0.00100018	0.00155835	0.00234391	FALSE	FALSE	FALSE
Jak1	0.00100004	0.00100174	0.00398168	FALSE	FALSE	FALSE
Rrs1	0.00100013	0.00100371	0.0146832	FALSE	FALSE	FALSE
Arrb1	0.00778871	0.0948335	0.0011086	FALSE	TRUE	FALSE
Ltn1	0.00100021	0.00274831	0.0158712	FALSE	FALSE	FALSE
Kdm5c	0.00100002	0.00100316	0.00147051	FALSE	FALSE	FALSE
Grn	0.00100018	0.00123918	0.0199102	FALSE	FALSE	FALSE
Hat1	0.00100016	0.00100248	0.00103615	FALSE	FALSE	FALSE
Chd4	0.00100015	0.00259972	0.00130961	FALSE	FALSE	FALSE
Gfra3	0.00100033	0.00100502	0.00951192	FALSE	FALSE	FALSE
Syce2	0.00100056	0.00102198	0.0010081	FALSE	FALSE	FALSE
Oas3	0.277651	0.00709397	0.11146	FALSE	FALSE	FALSE
Vegfb	0.0010005	0.00162132	0.0140934	FALSE	FALSE	FALSE
Ubxn7	0.00100004	0.00100189	0.00363724	FALSE	FALSE	FALSE
Gcfc2	0.00100079	0.00219304	0.001132	FALSE	FALSE	FALSE
Flrt3	0.00100029	0.00100269	0.015435	FALSE	FALSE	FALSE
Kcnb2	0.00100001	0.00100548	0.057417	FALSE	FALSE	FALSE
Dffb	0.00100011	0.00101346	0.00413285	FALSE	FALSE	FALSE
Nsun7	0.00100109	0.00103962	0.00881673	FALSE	FALSE	FALSE
Srgn	0.00100025	0.00101423	0.0291145	FALSE	FALSE	FALSE
Nagk	0.00100024	0.00100729	0.00820774	FALSE	FALSE	FALSE
Otud5	0.00100016	0.00100353	0.00100002	FALSE	FALSE	FALSE
Artn	0.0010029	0.00106418	0.0876015	FALSE	FALSE	FALSE
Ret	0.00100013	0.00234731	0.013819	FALSE	FALSE	FALSE
Asb6	0.00100025	0.00100584	0.0017471	FALSE	FALSE	FALSE
Fas	0.0010019	0.00101303	0.00761144	FALSE	FALSE	FALSE
Pomp	0.00100025	0.00100159	0.0018664	FALSE	FALSE	FALSE
Gnai3	0.00100022	0.00291164	0.00751247	FALSE	FALSE	FALSE
Kmt2d	0.0010002	0.00101384	0.0206498	FALSE	FALSE	FALSE
Rock1	0.00100019	0.00100886	0.00174535	FALSE	FALSE	FALSE
Dhrs1	0.00100015	0.00771458	0.0157151	FALSE	FALSE	FALSE
Wtip	0.00100035	0.0010088	0.00513402	FALSE	FALSE	FALSE
Dhx57	0.00100022	0.00166659	0.00840305	FALSE	FALSE	FALSE
Ubr1	0.00100004	0.00100476	0.00158673	FALSE	FALSE	FALSE
Galk1	0.00100026	0.00100649	0.0010416	FALSE	FALSE	FALSE
Ash1l	0.00100001	0.00100573	0.00535396	FALSE	FALSE	FALSE
Aip	0.00100007	0.00100639	0.0080381	FALSE	FALSE	FALSE
Cnot3	0.00100004	0.0010017	0.00567565	FALSE	FALSE	FALSE
Snta1	0.00176651	0.29659	0.00100122	FALSE	TRUE	FALSE
Eed	0.0010004	0.00191956	0.0146377	FALSE	FALSE	FALSE
Tgif2	0.00100009	0.00100969	0.00202166	FALSE	FALSE	FALSE
Cd36	0.00100004	0.00101219	0.0528479	FALSE	FALSE	FALSE
Yif1a	0.00100007	0.00100511	0.0186759	FALSE	FALSE	FALSE
Ibtk	0.0089552	0.0289988	0.0400884	FALSE	FALSE	FALSE
Atoh8	0.0010007	0.00102015	0.00669578	FALSE	FALSE	FALSE
Ncam2	0.00100028	0.00184625	0.220949	FALSE	FALSE	TRUE
Herc6	0.155948	0.00101926	0.00300103	TRUE	FALSE	FALSE
Gstk1	0.0010003	0.00284455	0.00100531	FALSE	FALSE	FALSE
Tlr1	0.00100138	0.00100384	0.0212934	FALSE	FALSE	FALSE
E2f1	0.00100018	0.00100277	0.0101381	FALSE	FALSE	FALSE
Pllp	0.00100023	0.00101605	0.00878477	FALSE	FALSE	FALSE
Dhx15	0.00100014	0.00100464	0.00353132	FALSE	FALSE	FALSE
Arpin	0.00100023	0.00100204	0.00116819	FALSE	FALSE	FALSE
Ext2	0.00100041	0.00553212	0.0010138	FALSE	FALSE	FALSE
Ddx55	0.00100028	0.00101236	0.0101482	FALSE	FALSE	FALSE
Tbx3	0.00100001	0.00100075	0.00226697	FALSE	FALSE	FALSE
Ska2	0.00100059	0.00100245	0.00302844	FALSE	FALSE	FALSE
Mxra8	0.00100011	0.00100727	0.00166012	FALSE	FALSE	FALSE
Foxp1	0.00100001	0.00100049	0.028363	FALSE	FALSE	FALSE
Cdr2	0.00100002	0.00100589	0.0118763	FALSE	FALSE	FALSE
Lgi1	0.00100019	0.00100203	0.00113911	FALSE	FALSE	FALSE
Etv5	0.0169666	0.242809	0.0158907	FALSE	TRUE	FALSE
Denr	0.00100004	0.0010003	0.00100037	FALSE	FALSE	FALSE
Il12a	0.00100048	0.00110622	0.0276031	FALSE	FALSE	FALSE
Cd38	0.00100087	0.00101109	0.00202284	FALSE	FALSE	FALSE
Mpeg1	0.0287566	0.00101207	0.0253429	FALSE	FALSE	FALSE
Maff	0.00100004	0.00101265	0.00124982	FALSE	FALSE	FALSE
Dph2	0.00100008	0.00100376	0.00126411	FALSE	FALSE	FALSE
Exoc1	0.00100007	0.00100082	0.00385957	FALSE	FALSE	FALSE
Med20	0.00100019	0.00100827	0.00100003	FALSE	FALSE	FALSE
Syde1	0.00100001	0.00100408	0.00432194	FALSE	FALSE	FALSE
Faf2	0.00100017	0.00100427	0.00178315	FALSE	FALSE	FALSE
Plin3	0.00100028	0.00100927	0.002075	FALSE	FALSE	FALSE
Cd3g	0.00100015	0.0010351	0.00794281	FALSE	FALSE	FALSE
Ptprd	0.00100016	0.00100555	0.015222	FALSE	FALSE	FALSE
Phc2	0.00100015	0.00100502	0.00214492	FALSE	FALSE	FALSE
Rai14	0.00100019	0.00100523	0.00227633	FALSE	FALSE	FALSE
Cyb5b	0.00100004	0.00100231	0.00539483	FALSE	FALSE	FALSE
Gpbp1	0.00100017	0.00100259	0.00111338	FALSE	FALSE	FALSE
Uhrf1	0.0127225	0.00261394	0.0558944	FALSE	FALSE	FALSE
Hdac9	0.0010001	0.00100479	0.00613766	FALSE	FALSE	FALSE
Sec63	0.00100005	0.00100134	0.00153528	FALSE	FALSE	FALSE
Gan	0.0010003	0.00345393	0.00302604	FALSE	FALSE	FALSE
Cdc26	0.00100011	0.00100703	0.00987719	FALSE	FALSE	FALSE
Smu1	0.00100034	0.00100286	0.00629688	FALSE	FALSE	FALSE
Brwd1	0.00100016	0.0010005	0.00228547	FALSE	FALSE	FALSE
Impa1	0.00100005	0.00100434	0.00127519	FALSE	FALSE	FALSE
Pbx4	0.00100008	0.00101642	0.00484031	FALSE	FALSE	FALSE
Hacd1	0.00100066	0.00100016	0.0164391	FALSE	FALSE	FALSE
Crls1	0.00100007	0.00100091	0.00168423	FALSE	FALSE	FALSE
Il33	0.00100116	0.00101211	0.0010797	FALSE	FALSE	FALSE
Mylk3	0.00100021	0.001033	0.0520737	FALSE	FALSE	FALSE
Ddah2	0.00100012	0.00100629	0.00307956	FALSE	FALSE	FALSE
Rtcb	0.00100006	0.00100288	0.00203051	FALSE	FALSE	FALSE
Trpc5	0.00100075	0.00202152	0.00236497	FALSE	FALSE	FALSE
Nxf1	0.00100009	0.00100051	0.00506171	FALSE	FALSE	FALSE
Met	0.00285199	0.00100285	0.00117326	FALSE	FALSE	FALSE
Lmod3	0.00100074	0.00102259	0.00235787	FALSE	FALSE	FALSE
Hcst	0.00100177	0.00100312	0.0505871	FALSE	FALSE	FALSE
Senp6	0.00100015	0.00100501	0.00192126	FALSE	FALSE	FALSE
Nxph3	0.00100004	0.00470926	0.00102323	FALSE	FALSE	FALSE
Mgst1	0.00100019	0.00101492	0.00102707	FALSE	FALSE	FALSE
Neto1	0.00100001	0.00101083	0.00124333	FALSE	FALSE	FALSE
Rab3c	0.00100007	0.00157454	0.00109154	FALSE	FALSE	FALSE
Chd6	0.00100003	0.00100459	0.032211	FALSE	FALSE	FALSE
Pgm5	0.00100078	0.0010207	0.00445895	FALSE	FALSE	FALSE
Sall1	0.00100068	0.00101389	0.0265099	FALSE	FALSE	FALSE
Rgs18	0.001002	0.0010584	0.0611848	FALSE	FALSE	FALSE
Gna12	0.00100028	0.00100332	0.00937632	FALSE	FALSE	FALSE
Ntng2	0.00100015	0.00189257	0.0010566	FALSE	FALSE	FALSE
Cpne8	0.00100006	0.00100593	0.00284026	FALSE	FALSE	FALSE
Cdc20	0.00100155	0.00103602	0.00393686	FALSE	FALSE	FALSE
Aim2	0.00100135	0.00100909	0.0548391	FALSE	FALSE	FALSE
Terf2	0.00100014	0.00100116	0.00444538	FALSE	FALSE	FALSE
Crem	0.00100024	0.00100685	0.0310429	FALSE	FALSE	FALSE
Mysm1	0.00100034	0.00100357	0.00315555	FALSE	FALSE	FALSE
Cpsf7	0.00100026	0.00100431	0.00144504	FALSE	FALSE	FALSE
Vps4b	0.00100027	0.00100572	0.00233806	FALSE	FALSE	FALSE
Rab3a	0.00100012	0.00134407	0.00531405	FALSE	FALSE	FALSE
Aifm1	0.00100006	0.00100247	0.00113602	FALSE	FALSE	FALSE
Ush2a	0.00100303	0.00106364	0.0793244	FALSE	FALSE	FALSE
Rfc3	0.0010007	0.00141827	0.00161204	FALSE	FALSE	FALSE
Gulp1	0.00100099	0.00101728	0.00470631	FALSE	FALSE	FALSE
Myo10	0.00341686	0.0194633	0.009859	FALSE	FALSE	FALSE
Wdr48	0.00100013	0.00100387	0.00144743	FALSE	FALSE	FALSE
Ndrg1	0.00100045	0.00100481	0.0196997	FALSE	FALSE	FALSE
Ncbp2	0.00100029	0.00100301	0.00128854	FALSE	FALSE	FALSE
Plin5	0.00100383	0.00107196	0.00437674	FALSE	FALSE	FALSE
Slirp	0.001	0.00101269	0.00528095	FALSE	FALSE	FALSE
Itm2b	0.00100018	0.00156065	0.00233161	FALSE	FALSE	FALSE
Krr1	0.00100036	0.00100564	0.00108939	FALSE	FALSE	FALSE
Larp4	0.00100006	0.00100287	0.00466366	FALSE	FALSE	FALSE
Ptpre	0.00100035	0.00310649	0.0059421	FALSE	FALSE	FALSE
Sept9	0.00641625	0.00124919	0.00989946	FALSE	FALSE	FALSE
Lsm3	0.00100003	0.0010076	0.0129155	FALSE	FALSE	FALSE
Tcf15	0.00100258	0.00113344	0.00444887	FALSE	FALSE	FALSE
Smad2	0.00100006	0.00100623	0.00289162	FALSE	FALSE	FALSE
Ipo7	0.00100002	0.00100049	0.0142527	FALSE	FALSE	FALSE
Smc5	0.00100003	0.00222259	0.0108581	FALSE	FALSE	FALSE
Plec	0.00100023	0.0019285	0.0223086	FALSE	FALSE	FALSE
Apba1	0.00100006	0.00100043	0.00100032	FALSE	FALSE	FALSE
Pidd1	0.00100061	0.00155763	0.00534624	FALSE	FALSE	FALSE
Xpo7	0.00100002	0.00100072	0.00298367	FALSE	FALSE	FALSE
Ndnf	0.00100004	0.00102338	0.00439529	FALSE	FALSE	FALSE
Ddx42	0.00100015	0.00100325	0.0123703	FALSE	FALSE	FALSE
Rrp15	0.00100055	0.0010182	0.024997	FALSE	FALSE	FALSE
Hmgb2	0.00100166	0.001014	0.0519808	FALSE	FALSE	FALSE
Senp8	0.00100022	0.0010059	0.00103947	FALSE	FALSE	FALSE
Dtx3l	0.0715238	0.00101086	0.00411528	TRUE	FALSE	FALSE
Kctd9	0.00100026	0.00100275	0.00296807	FALSE	FALSE	FALSE
Rtn4	0.00100001	0.00100311	0.00100098	FALSE	FALSE	FALSE
Vldlr	0.00100007	0.00100376	0.00207624	FALSE	FALSE	FALSE
Rras2	0.00100065	0.00264437	0.00295941	FALSE	FALSE	FALSE
Wbp4	0.00100012	0.00100551	0.00332963	FALSE	FALSE	FALSE
Tyrp1	0.00100046	0.00859747	0.183256	FALSE	FALSE	FALSE
Nol10	0.00100023	0.00100274	0.00177573	FALSE	FALSE	FALSE
Ing1	0.00100021	0.00100927	0.0130144	FALSE	FALSE	FALSE
Srr	0.00100023	0.00100733	0.00287315	FALSE	FALSE	FALSE
Rcn3	0.0010007	0.00199396	0.00609785	FALSE	FALSE	FALSE
Syt6	0.00100003	0.00100123	0.00218901	FALSE	FALSE	FALSE
Atp7a	0.00100013	0.00155529	0.00115133	FALSE	FALSE	FALSE
Gria3	0.00100005	0.00100882	0.00287806	FALSE	FALSE	FALSE
Rftn1	0.00100103	0.00103026	0.00113369	FALSE	FALSE	FALSE
Spc24	0.00100071	0.00102836	0.00143852	FALSE	FALSE	FALSE
Memo1	0.00100007	0.0010024	0.00189752	FALSE	FALSE	FALSE
Sec13	0.00100015	0.00100585	0.00184155	FALSE	FALSE	FALSE
Nucb1	0.0010001	0.00100486	0.011167	FALSE	FALSE	FALSE
Myct1	0.00100065	0.00100417	0.00910266	FALSE	FALSE	FALSE
Cebpg	0.00100018	0.00100366	0.00157477	FALSE	FALSE	FALSE
Erbb4	0.00100109	0.00102462	0.0953769	FALSE	FALSE	FALSE
Nfx1	0.00100003	0.00100485	0.0133449	FALSE	FALSE	FALSE
Nod1	0.00100005	0.00100299	0.00423759	FALSE	FALSE	FALSE
Mpi	0.00100006	0.00100043	0.00102444	FALSE	FALSE	FALSE
Olfm4	0.00100205	0.00100793	0.0228502	FALSE	FALSE	FALSE
Stox2	0.0010001	0.00100157	0.00102139	FALSE	FALSE	FALSE
Smad9	0.00100006	0.00583232	0.00642938	FALSE	FALSE	FALSE
Tacc1	0.00100002	0.00100034	0.00193164	FALSE	FALSE	FALSE
Fads1	0.00100023	0.00100202	0.0417086	FALSE	FALSE	FALSE
Twf2	0.00100009	0.00100041	0.0211889	FALSE	FALSE	FALSE
Crkl	0.00100021	0.00100403	0.00443029	FALSE	FALSE	FALSE
Nab1	0.00100028	0.00100164	0.00923978	FALSE	FALSE	FALSE
Dok3	0.00100057	0.00101469	0.0157013	FALSE	FALSE	FALSE
Rab1b	0.001	0.00100234	0.00462136	FALSE	FALSE	FALSE
Lrp1b	0.00100037	0.00100442	0.0022124	FALSE	FALSE	FALSE
Sox2	0.00170714	0.00152743	0.0447159	FALSE	FALSE	FALSE
Jag2	0.00100017	0.00100395	0.0011173	FALSE	FALSE	FALSE
Map1b	0.00100004	0.00100941	0.0117622	FALSE	FALSE	FALSE
Fbxw4	0.0010002	0.00100954	0.00280095	FALSE	FALSE	FALSE
Lats1	0.00100007	0.00100354	0.00140208	FALSE	FALSE	FALSE
Cflar	0.0010002	0.00131196	0.001	FALSE	FALSE	FALSE
Ddx49	0.00100003	0.00100183	0.00142554	FALSE	FALSE	FALSE
Lmcd1	0.00100011	0.00101682	0.00657262	FALSE	FALSE	FALSE
Rhpn2	0.00200768	0.00448414	0.0861896	FALSE	FALSE	FALSE
Ugdh	0.00100009	0.0010072	0.00114103	FALSE	FALSE	FALSE
Myh3	0.00100175	0.00105143	0.0212452	FALSE	FALSE	FALSE
Wdfy3	0.00100004	0.00110266	0.00670196	FALSE	FALSE	FALSE
Mzb1	0.00100319	0.0011739	0.0016378	FALSE	FALSE	FALSE
Banp	0.00100058	0.00101098	0.0027554	FALSE	FALSE	FALSE
Max	0.00100018	0.00100143	0.00666887	FALSE	FALSE	FALSE
Ap2a1	0.00100011	0.00100429	0.00154631	FALSE	FALSE	FALSE
Igf2	0.00100059	0.00103695	0.030181	FALSE	FALSE	FALSE
Eif1b	0.00271462	0.0140684	0.0307894	FALSE	FALSE	FALSE
Rufy1	0.00100033	0.00100465	0.0108297	FALSE	FALSE	FALSE
Cbx2	0.00100039	0.00100031	0.00118778	FALSE	FALSE	FALSE
Ddah1	0.00100018	0.001	0.0614847	FALSE	FALSE	FALSE
Exoc4	0.00100012	0.00462741	0.00586059	FALSE	FALSE	FALSE
Sap30	0.00100043	0.00100417	0.00843097	FALSE	FALSE	FALSE
Dkc1	0.0010003	0.0010096	0.00399819	FALSE	FALSE	FALSE
Stim1	0.00100024	0.00190817	0.00774892	FALSE	FALSE	FALSE
Stx7	0.00100012	0.00100123	0.00245595	FALSE	FALSE	FALSE
Sync	0.00100028	0.00121963	0.00274033	FALSE	FALSE	FALSE
Rfx4	0.00100173	0.00104124	0.00148472	FALSE	FALSE	FALSE
Nlrc5	0.028034	0.00104886	0.00892401	FALSE	FALSE	FALSE
Tfe3	0.00100002	0.00100552	0.00108632	FALSE	FALSE	FALSE
Rara	0.00100042	0.00100615	0.00180427	FALSE	FALSE	FALSE
Hax1	0.00100026	0.00100714	0.00168719	FALSE	FALSE	FALSE
Sfrp1	0.00100006	0.00166392	0.00319429	FALSE	FALSE	FALSE
Fzd3	0.00100029	0.00100409	0.0162679	FALSE	FALSE	FALSE
Vcam1	0.00100161	0.00262967	0.0559326	FALSE	FALSE	FALSE
Dlk1	0.00100188	0.0541271	0.0113897	FALSE	FALSE	FALSE
Ctf1	0.00100162	0.00103188	0.00298138	FALSE	FALSE	FALSE
Dbnl	0.00100015	0.00100015	0.00238431	FALSE	FALSE	FALSE
Sdc4	0.00100009	0.00299083	0.00375331	FALSE	FALSE	FALSE
Cdv3	0.00100018	0.00333225	0.00123587	FALSE	FALSE	FALSE
Phf14	0.00100028	0.00100261	0.00205667	FALSE	FALSE	FALSE
Cetn2	0.00100015	0.00100024	0.0018819	FALSE	FALSE	FALSE
Crk	0.00100005	0.00100102	0.00437248	FALSE	FALSE	FALSE
Nmt1	0.00100006	0.00100477	0.00121982	FALSE	FALSE	FALSE
Fbxw7	0.00100016	0.00100157	0.00167046	FALSE	FALSE	FALSE
Ptgr1	0.00100015	0.00101341	0.00144218	FALSE	FALSE	FALSE
Gtf2i	0.00100006	0.00116957	0.00286379	FALSE	FALSE	FALSE
Gnai1	0.00100009	0.00100522	0.00116893	FALSE	FALSE	FALSE
Dscam	0.00100048	0.00100238	0.00139537	FALSE	FALSE	FALSE
Acsf2	0.00100024	0.00142362	0.00150255	FALSE	FALSE	FALSE
Frs3	0.0010001	0.00100294	0.00219918	FALSE	FALSE	FALSE
Rabl3	0.00100026	0.00100022	0.00142457	FALSE	FALSE	FALSE
Socs6	0.00100015	0.00101018	0.00162873	FALSE	FALSE	FALSE
Hnf1a	0.00100302	0.00107241	0.00101458	FALSE	FALSE	FALSE
Myo1g	0.00100062	0.00102647	0.0477264	FALSE	FALSE	FALSE
Osr1	0.00100013	0.00100569	0.1088	FALSE	FALSE	FALSE
Orc5	0.00100031	0.00116184	0.00100397	FALSE	FALSE	FALSE
Calr3	0.00100031	0.00102053	0.00161569	FALSE	FALSE	FALSE
Adk	0.00100025	0.00100549	0.00100395	FALSE	FALSE	FALSE
Cstf1	0.00100021	0.00100621	0.00212915	FALSE	FALSE	FALSE
Zhx2	0.00100002	0.00100127	0.0011112	FALSE	FALSE	FALSE
Cenpq	0.00100022	0.00101501	0.0019914	FALSE	FALSE	FALSE
Nlrx1	0.00100034	0.00100895	0.00288088	FALSE	FALSE	FALSE
Fcrla	0.0010015	0.00425213	0.013198	FALSE	FALSE	FALSE
Mc3r	0.0010006	0.00101185	0.00135031	FALSE	FALSE	FALSE
Pqbp1	0.00100006	0.00149825	0.0207897	FALSE	FALSE	FALSE
Hcn2	0.00100018	0.0123924	0.00295841	FALSE	FALSE	FALSE
Wdr92	0.00100041	0.00101805	0.00615964	FALSE	FALSE	FALSE
Sart3	0.00100004	0.00100091	0.00170383	FALSE	FALSE	FALSE
Scaf8	0.00100017	0.00100304	0.00139924	FALSE	FALSE	FALSE
Pias3	0.00100045	0.00100486	0.00361412	FALSE	FALSE	FALSE
Pygl	0.00100036	0.00100069	0.00733284	FALSE	FALSE	FALSE
Nup43	0.00100028	0.00259537	0.058863	FALSE	FALSE	FALSE
Gata2	0.00100006	0.00100799	0.00130285	FALSE	FALSE	FALSE
Brsk1	0.00100013	0.00100398	0.00234816	FALSE	FALSE	FALSE
Nrm	0.00100014	0.00101962	0.00813155	FALSE	FALSE	FALSE
Cntrl	0.00100012	0.00100635	0.0274617	FALSE	FALSE	FALSE
Enkur	0.00100009	0.00104225	0.0228826	FALSE	FALSE	FALSE
Ndc80	0.00100014	0.00101617	0.0332794	FALSE	FALSE	FALSE
Myof	0.00100048	0.00775045	0.0868971	FALSE	FALSE	FALSE
Ccr1	0.00100178	0.0288664	0.131732	FALSE	FALSE	FALSE
Litaf	0.00100047	0.0215811	0.0146211	FALSE	FALSE	FALSE
Mob1a	0.0010003	0.00100801	0.00777896	FALSE	FALSE	FALSE
Cbr3	0.011729	0.0185285	0.00313851	FALSE	FALSE	FALSE
Rgl2	0.00100005	0.00100428	0.0224124	FALSE	FALSE	FALSE
Gab2	0.00100034	0.00100446	0.00126507	FALSE	FALSE	FALSE
Abl1	0.0010001	0.00100201	0.00116513	FALSE	FALSE	FALSE
Ddhd1	0.00100004	0.00100407	0.0012724	FALSE	FALSE	FALSE
Lrch2	0.00100008	0.00100211	0.00600181	FALSE	FALSE	FALSE
Mbl2	0.00100151	0.00100243	0.0769927	FALSE	FALSE	FALSE
Rpa2	0.00100066	0.00100696	0.0315224	FALSE	FALSE	FALSE
Stt3a	0.00100005	0.00100025	0.00112727	FALSE	FALSE	FALSE
Tgfb1	0.00100022	0.00101012	0.013367	FALSE	FALSE	FALSE
Csk	0.00100006	0.00100195	0.002293	FALSE	FALSE	FALSE
Zzef1	0.00100015	0.00835451	0.00620835	FALSE	FALSE	FALSE
Atf7	0.00100002	0.00100088	0.00500089	FALSE	FALSE	FALSE
Nck2	0.00100037	0.0113175	0.00401529	FALSE	FALSE	FALSE
Smcr8	0.00100009	0.00100075	0.00315633	FALSE	FALSE	FALSE
Stk10	0.00100037	0.0010052	0.013047	FALSE	FALSE	FALSE
Abt1	0.00100028	0.00568479	0.0112581	FALSE	FALSE	FALSE
Vsx1	0.00100547	0.00117086	0.0403032	FALSE	FALSE	FALSE
Gpc4	0.00100012	0.00100846	0.00119253	FALSE	FALSE	FALSE
Mon2	0.001	0.0010011	0.00259131	FALSE	FALSE	FALSE
Cul7	0.0010001	0.00100017	0.00100152	FALSE	FALSE	FALSE
Asf1b	0.00100045	0.00104585	0.00961897	FALSE	FALSE	FALSE
Nop10	0.00100019	0.00100572	0.0249304	FALSE	FALSE	FALSE
Pigs	0.00100003	0.00100003	0.00797683	FALSE	FALSE	FALSE
Ddx20	0.00100057	0.00543706	0.00962103	FALSE	FALSE	FALSE
Cntfr	0.0010001	0.00109314	0.00116236	FALSE	FALSE	FALSE
Rab8a	0.00100011	0.00100585	0.00891221	FALSE	FALSE	FALSE
Cir1	0.00100023	0.00101098	0.00421302	FALSE	FALSE	FALSE
Satb2	0.00100113	0.00103813	0.0119126	FALSE	FALSE	FALSE
Rbbp6	0.00100012	0.0010084	0.00973465	FALSE	FALSE	FALSE
Med26	0.00100006	0.0010051	0.00262499	FALSE	FALSE	FALSE
Mlh1	0.00100011	0.00100772	0.0170884	FALSE	FALSE	FALSE
Nrp1	0.00100016	0.00100623	0.00123463	FALSE	FALSE	FALSE
Pask	0.00100081	0.00100873	0.0350835	FALSE	FALSE	FALSE
Socs7	0.00100023	0.00100465	0.00122527	FALSE	FALSE	FALSE
Cpsf4	0.00100047	0.00101806	0.0472966	FALSE	FALSE	FALSE
Fndc5	0.00100024	0.00904085	0.00857646	FALSE	FALSE	FALSE
Riok2	0.00100014	0.00100127	0.00145317	FALSE	FALSE	FALSE
Tgif1	0.00100028	0.00100533	0.0203093	FALSE	FALSE	FALSE
Mtf2	0.00100015	0.00100378	0.00455051	FALSE	FALSE	FALSE
Srsf7	0.00100005	0.00100656	0.00130226	FALSE	FALSE	FALSE
Sun1	0.00100012	0.00100107	0.0143793	FALSE	FALSE	FALSE
Smad4	0.00100005	0.00100393	0.00100463	FALSE	FALSE	FALSE
Gopc	0.00100031	0.00140133	0.00114576	FALSE	FALSE	FALSE
Trpv1	0.00100024	0.0102671	0.00100934	FALSE	FALSE	FALSE
Sntg1	0.001	0.00100803	0.00374747	FALSE	FALSE	FALSE
Top3a	0.00100019	0.00101542	0.00597219	FALSE	FALSE	FALSE
Cbs	0.00100301	0.00106009	0.103321	FALSE	FALSE	FALSE
Lsm1	0.00100014	0.00101417	0.021219	FALSE	FALSE	FALSE
Six5	0.00100079	0.00150049	0.0454565	FALSE	FALSE	FALSE
Tns2	0.00100023	0.022144	0.0562948	FALSE	FALSE	FALSE
Rhoa	0.00100001	0.00100423	0.00963501	FALSE	FALSE	FALSE
Mat2b	0.00100004	0.00345679	0.00100701	FALSE	FALSE	FALSE
Zfp69	0.00100024	0.00100635	0.0667778	FALSE	FALSE	FALSE
Bzw2	0.00100003	0.00100066	0.00489683	FALSE	FALSE	FALSE
Efnb1	0.00100044	0.00101005	0.00121308	FALSE	FALSE	FALSE
Vrk3	0.0010002	0.0010011	0.00982095	FALSE	FALSE	FALSE
Ep400	0.00100015	0.00100813	0.00145664	FALSE	FALSE	FALSE
Med19	0.00100017	0.00100285	0.00275902	FALSE	FALSE	FALSE
Mycn	0.00100006	0.00100262	0.00895748	FALSE	FALSE	FALSE
Nudt5	0.00100027	0.00100056	0.010418	FALSE	FALSE	FALSE
Itsn2	0.00100002	0.00100181	0.00239174	FALSE	FALSE	FALSE
Aff3	0.00100011	0.00100588	0.00110207	FALSE	FALSE	FALSE
Gabpa	0.00100032	0.00100246	0.00561495	FALSE	FALSE	FALSE
Glod4	0.00100008	0.00100358	0.0128404	FALSE	FALSE	FALSE
Cxxc5	0.00100008	0.00100345	0.00131538	FALSE	FALSE	FALSE
Tcam1	0.00100026	0.00103525	0.0110757	FALSE	FALSE	FALSE
Kif5c	0.00100008	0.00100315	0.00103528	FALSE	FALSE	FALSE
Ace	0.00100007	0.00680757	0.0178159	FALSE	FALSE	FALSE
Men1	0.00100008	0.00100084	0.0122847	FALSE	FALSE	FALSE
Crlf3	0.00100027	0.00100711	0.00142639	FALSE	FALSE	FALSE
Aph1a	0.00100018	0.00614495	0.00428248	FALSE	FALSE	FALSE
Srpk1	0.00100002	0.00100788	0.00314349	FALSE	FALSE	FALSE
Skp2	0.00100012	0.00176789	0.00154716	FALSE	FALSE	FALSE
Dna2	0.00100147	0.0213925	0.0884242	FALSE	FALSE	FALSE
Ezh2	0.00100031	0.00102523	0.00640776	FALSE	FALSE	FALSE
Madd	0.00100018	0.00100131	0.00129513	FALSE	FALSE	FALSE
Ptbp1	0.00100004	0.0015825	0.00118307	FALSE	FALSE	FALSE
C1qc	0.00729243	0.00100041	0.0015781	FALSE	FALSE	FALSE
Eif2a	0.00100018	0.00100006	0.0010182	FALSE	FALSE	FALSE
Itch	0.00100014	0.00100165	0.00101265	FALSE	FALSE	FALSE
Stk3	0.00100052	0.00642004	0.00142819	FALSE	FALSE	FALSE
P4ha2	0.00100012	0.00101062	0.0021926	FALSE	FALSE	FALSE
Gnaq	0.00100022	0.00235407	0.0016144	FALSE	FALSE	FALSE
Nacc2	0.00100003	0.00100109	0.00113312	FALSE	FALSE	FALSE
Rer1	0.00100018	0.0010032	0.014418	FALSE	FALSE	FALSE
Fmnl3	0.00100033	0.00100774	0.0189416	FALSE	FALSE	FALSE
Wdr34	0.00100052	0.00100819	0.0284557	FALSE	FALSE	FALSE
Tma16	0.00100006	0.00100802	0.0194195	FALSE	FALSE	FALSE
Pi4kb	0.00100001	0.00100442	0.00298395	FALSE	FALSE	FALSE
Cstf2	0.00100003	0.00100148	0.00156198	FALSE	FALSE	FALSE
Hsbp1	0.00100016	0.00100113	0.00897826	FALSE	FALSE	FALSE
Meox1	0.00100215	0.166944	0.0509189	FALSE	FALSE	FALSE
Rec8	0.00100078	0.0010196	0.00124722	FALSE	FALSE	FALSE
Ipo8	0.00100008	0.0010037	0.00250714	FALSE	FALSE	FALSE
Ubc	0.0010003	0.00374657	0.0168074	FALSE	FALSE	FALSE
Msrb3	0.00100019	0.00261602	0.00596805	FALSE	FALSE	FALSE
Srf	0.00100003	0.00100663	0.00489807	FALSE	FALSE	FALSE
Hint2	0.00100005	0.00100562	0.00100002	FALSE	FALSE	FALSE
Dmc1	0.00100165	0.00100389	0.00707004	FALSE	FALSE	FALSE
Ddx52	0.00100045	0.001004	0.00779183	FALSE	FALSE	FALSE
Pde2a	0.00100004	0.00100328	0.00743732	FALSE	FALSE	FALSE
Clip2	0.00100011	0.0010015	0.00132112	FALSE	FALSE	FALSE
Plvap	0.00100046	0.00212084	0.0010517	FALSE	FALSE	FALSE
Rbm26	0.0010003	0.0010078	0.0129062	FALSE	FALSE	FALSE
Nub1	0.00100001	0.00100198	0.00193905	FALSE	FALSE	FALSE
Glrb	0.00100026	0.00110587	0.00100159	FALSE	FALSE	FALSE
Degs1	0.001	0.00100384	0.00933088	FALSE	FALSE	FALSE
Aida	0.00100028	0.00307263	0.00188381	FALSE	FALSE	FALSE
Nphp3	0.00100017	0.0010048	0.0465077	FALSE	FALSE	FALSE
Epha5	0.0010001	0.122634	0.00117381	FALSE	FALSE	FALSE
Gdf5	0.00100118	0.00111707	0.508212	FALSE	FALSE	FALSE
Apbb3	0.00100002	0.00100453	0.00252502	FALSE	FALSE	FALSE
S100b	0.00100013	0.00100526	0.00298122	FALSE	FALSE	FALSE
Slx4	0.00100014	0.00101027	0.00217412	FALSE	FALSE	FALSE
Pax8	0.00100065	0.00165822	0.0155449	FALSE	FALSE	FALSE
Ring1	0.00100014	0.00100084	0.00867419	FALSE	FALSE	FALSE
Sntb1	0.00958045	0.0139891	0.0476729	FALSE	FALSE	FALSE
Tnnt3	0.00100381	0.00108778	0.0150602	FALSE	FALSE	FALSE
Cdk9	0.00100024	0.00143992	0.0036878	FALSE	FALSE	FALSE
Thoc5	0.00100015	0.00100618	0.00227737	FALSE	FALSE	FALSE
Mycbp	0.00100015	0.00100422	0.0122533	FALSE	FALSE	FALSE
Fcho2	0.00100014	0.00100542	0.0236897	FALSE	FALSE	FALSE
Dmd	0.00100023	0.00100138	0.0142476	FALSE	FALSE	FALSE
Azi2	0.00100014	0.0010051	0.00221965	FALSE	FALSE	FALSE
Casp7	0.00100103	0.00100173	0.0139835	FALSE	FALSE	FALSE
Bmx	0.00100094	0.00100935	0.00388464	FALSE	FALSE	FALSE
Mc4r	0.00100191	0.00100508	0.0111292	FALSE	FALSE	FALSE
Ngly1	0.00100008	0.00100273	0.00103311	FALSE	FALSE	FALSE
Mef2c	0.0010003	0.0233365	0.00152372	FALSE	FALSE	FALSE
Rxrb	0.00100006	0.00111325	0.00432333	FALSE	FALSE	FALSE
Mtor	0.00100019	0.00796358	0.0111462	FALSE	FALSE	FALSE
Oxsr1	0.00100001	0.00100594	0.00713602	FALSE	FALSE	FALSE
Ccnb1	0.00100101	0.00100747	0.00485106	FALSE	FALSE	FALSE
Vps53	0.00100006	0.0010028	0.00378852	FALSE	FALSE	FALSE
Rcc1	0.0010001	0.00100588	0.0184331	FALSE	FALSE	FALSE
Apmap	0.00100009	0.0010083	0.00166784	FALSE	FALSE	FALSE
Tia1	0.0010002	0.00100759	0.0246294	FALSE	FALSE	FALSE
Stx17	0.00100001	0.00100826	0.00367765	FALSE	FALSE	FALSE
Ptprb	0.0010005	0.00100228	0.00151245	FALSE	FALSE	FALSE
Ubr5	0.00100024	0.00559556	0.0222874	FALSE	FALSE	FALSE
Ptprn	0.00100014	0.0011943	0.00100304	FALSE	FALSE	FALSE
Sytl1	0.00100283	0.00103143	0.0018645	FALSE	FALSE	FALSE
Psmd5	0.00100004	0.00178935	0.00249039	FALSE	FALSE	FALSE
Lima1	0.00100031	0.00369743	0.00196755	FALSE	FALSE	FALSE
Lrrc2	0.00100156	0.00101401	0.00291337	FALSE	FALSE	FALSE
Ddc	0.00100063	0.00101696	0.00100096	FALSE	FALSE	FALSE
Mbtd1	0.00100009	0.0010035	0.0055719	FALSE	FALSE	FALSE
Timp3	0.0010001	0.00100578	0.0010531	FALSE	FALSE	FALSE
Sv2b	0.00100002	0.0010035	0.00776952	FALSE	FALSE	FALSE
Tada3	0.00100004	0.00100701	0.00291462	FALSE	FALSE	FALSE
Fhl2	0.00100067	0.0084057	0.155048	FALSE	FALSE	FALSE
Fgd5	0.00100019	0.00100083	0.00107449	FALSE	FALSE	FALSE
Rpn2	0.00100005	0.00100219	0.00849104	FALSE	FALSE	FALSE
Abtb1	0.00100014	0.0010052	0.00104831	FALSE	FALSE	FALSE
Cpeb1	0.00100003	0.00105825	0.00562037	FALSE	FALSE	FALSE
Tnik	0.00100033	0.00100616	0.0010008	FALSE	FALSE	FALSE
Cntn4	0.00100067	0.00124869	0.00132902	FALSE	FALSE	FALSE
Ephb4	0.00100002	0.00101234	0.00188037	FALSE	FALSE	FALSE
Chd7	0.00100045	0.00130077	0.0273795	FALSE	FALSE	FALSE
Nop14	0.00100036	0.00100806	0.00959101	FALSE	FALSE	FALSE
Adh1	0.00100108	0.00101896	0.0600334	FALSE	FALSE	FALSE
Limk1	0.00100008	0.00100178	0.00121355	FALSE	FALSE	FALSE
Kmt2c	0.00100008	0.0010116	0.00885859	FALSE	FALSE	FALSE
Palm	0.00100002	0.0010015	0.00139042	FALSE	FALSE	FALSE
Chd8	0.00100023	0.00112066	0.0345912	FALSE	FALSE	FALSE
Gmip	0.00100063	0.00538225	0.1239	FALSE	FALSE	FALSE
Lrp2	0.00100021	0.0010143	0.00105752	FALSE	FALSE	FALSE
Phtf1	0.00100011	0.00100263	0.00110322	FALSE	FALSE	FALSE
Cep63	0.00100039	0.00100939	0.00619111	FALSE	FALSE	FALSE
Lbr	0.00100012	0.0010129	0.00596803	FALSE	FALSE	FALSE
Ercc8	0.00100017	0.00101691	0.00353356	FALSE	FALSE	FALSE
Etfa	0.00100008	0.00230007	0.00191374	FALSE	FALSE	FALSE
Vps41	0.00100007	0.00100093	0.00114336	FALSE	FALSE	FALSE
Rad51	0.00100149	0.00307451	0.00100555	FALSE	FALSE	FALSE
Stk31	0.00100448	0.00101717	0.194062	FALSE	FALSE	FALSE
Iffo1	0.00100003	0.00100206	0.00826374	FALSE	FALSE	FALSE
Desi1	0.00100033	0.00100406	0.00125424	FALSE	FALSE	FALSE
Derl2	0.00100009	0.00100006	0.00145248	FALSE	FALSE	FALSE
Fhl5	0.00100162	0.00113352	0.00584077	FALSE	FALSE	FALSE
Cdk7	0.00100009	0.00118627	0.00110893	FALSE	FALSE	FALSE
Mbd4	0.00100045	0.00133556	0.0202975	FALSE	FALSE	FALSE
Phf20	0.0010001	0.00100337	0.00240657	FALSE	FALSE	FALSE
Matn2	0.00100024	0.111058	0.0518153	FALSE	TRUE	FALSE
Ssrp1	0.00100024	0.00100092	0.00100009	FALSE	FALSE	FALSE
Sumf2	0.00100035	0.00100382	0.00235933	FALSE	FALSE	FALSE
Cd79b	0.00100074	0.00104589	0.0119246	FALSE	FALSE	FALSE
Noc4l	0.00100013	0.00100522	0.00694966	FALSE	FALSE	FALSE
Orc4	0.00100032	0.0021861	0.00144386	FALSE	FALSE	FALSE
Asns	0.00100007	0.00100592	0.00569717	FALSE	FALSE	FALSE
Bex2	0.00100008	0.00100504	0.00492434	FALSE	FALSE	FALSE
Fgd1	0.00100003	0.00100165	0.00129605	FALSE	FALSE	FALSE
Kif27	0.00100109	0.00102679	0.00706043	FALSE	FALSE	FALSE
Luzp1	0.00100014	0.00100535	0.00918403	FALSE	FALSE	FALSE
Nedd4	0.00100011	0.00100098	0.00102571	FALSE	FALSE	FALSE
Psme4	0.00100005	0.0136755	0.00101706	FALSE	FALSE	FALSE
Cdk12	0.00100024	0.00100514	0.00490626	FALSE	FALSE	FALSE
Lipc	0.00100007	0.00109794	0.055944	FALSE	FALSE	FALSE
Nubpl	0.00100012	0.00100689	0.00190945	FALSE	FALSE	FALSE
Rcan1	0.00100017	0.00100525	0.00485339	FALSE	FALSE	FALSE
Sept8	0.00212845	0.00224134	0.00154359	FALSE	FALSE	FALSE
Lzts2	0.00100033	0.00100078	0.0010001	FALSE	FALSE	FALSE
Vamp8	0.00100073	0.00100714	0.00658479	FALSE	FALSE	FALSE
Aimp2	0.00100012	0.00100101	0.00966827	FALSE	FALSE	FALSE
Srsf9	0.00100022	0.00100524	0.00249978	FALSE	FALSE	FALSE
Mdc1	0.00100018	0.00100084	0.036234	FALSE	FALSE	FALSE
Tead2	0.00100018	0.0010067	0.00100141	FALSE	FALSE	FALSE
Lrrk1	0.00100065	0.00210821	0.0193444	FALSE	FALSE	FALSE
Zfhx2	0.0010001	0.00100794	0.00229708	FALSE	FALSE	FALSE
Dpys	0.00100087	0.0064473	0.0105225	FALSE	FALSE	FALSE
Axin1	0.00100014	0.00100053	0.00387192	FALSE	FALSE	FALSE
Socs5	0.00100012	0.00100104	0.00128949	FALSE	FALSE	FALSE
Traf1	0.0010002	0.0010216	0.00197656	FALSE	FALSE	FALSE
Sphk2	0.0010001	0.00490809	0.00110413	FALSE	FALSE	FALSE
Mtpn	0.00100007	0.00100259	0.00456091	FALSE	FALSE	FALSE
Ttll3	0.001	0.00100667	0.00133905	FALSE	FALSE	FALSE
Myd88	0.00100007	0.00100058	0.0122199	FALSE	FALSE	FALSE
Wwp2	0.00100006	0.00100526	0.00238257	FALSE	FALSE	FALSE
Bmp2	0.00100068	0.011676	0.00607543	FALSE	FALSE	FALSE
Trib1	0.00100055	0.0296168	0.00319543	FALSE	FALSE	FALSE
Rims1	0.00100033	0.00632213	0.00596447	FALSE	FALSE	FALSE
Rem2	0.00390734	0.00842081	0.00612557	FALSE	FALSE	FALSE
Cd3e	0.00100134	0.00101029	0.00352657	FALSE	FALSE	FALSE
Nr6a1	0.00100023	0.00100216	0.0383524	FALSE	FALSE	FALSE
Gfpt1	0.00100005	0.00100443	0.00152888	FALSE	FALSE	FALSE
Tnpo2	0.00100014	0.00100404	0.00112942	FALSE	FALSE	FALSE
Rab43	0.00278393	0.00955479	0.00908748	FALSE	FALSE	FALSE
Hspb1	0.00100013	0.00100047	0.0203066	FALSE	FALSE	FALSE
Tekt4	0.0010004	0.00105332	0.00121931	FALSE	FALSE	FALSE
Fmnl1	0.00100008	0.00100646	0.00213272	FALSE	FALSE	FALSE
Lyn	0.00100049	0.00101501	0.00154105	FALSE	FALSE	FALSE
Pard3	0.00100018	0.00321095	0.002231	FALSE	FALSE	FALSE
Pcdh8	0.00100038	0.00100465	0.00346553	FALSE	FALSE	FALSE
Myo15	0.00100062	0.017312	0.00199928	FALSE	FALSE	FALSE
Ulk2	0.00100011	0.00100015	0.0024233	FALSE	FALSE	FALSE
Vegfa	0.00100002	0.00114127	0.0154115	FALSE	FALSE	FALSE
Foxp4	0.00100016	0.00100062	0.0094136	FALSE	FALSE	FALSE
Copb2	0.00100005	0.00100259	0.0013033	FALSE	FALSE	FALSE
Foxj2	0.00100001	0.00100267	0.00108265	FALSE	FALSE	FALSE
Aqr	0.00100006	0.0010008	0.00109674	FALSE	FALSE	FALSE
Cnpy4	0.00100021	0.00100677	0.013821	FALSE	FALSE	FALSE
Rp9	0.00100002	0.00100069	0.0169225	FALSE	FALSE	FALSE
Ccpg1	0.0010001	0.0010013	0.00209746	FALSE	FALSE	FALSE
Icam1	0.00100109	0.00102111	0.00641288	FALSE	FALSE	FALSE
Spag4	0.00100007	0.00100145	0.00140444	FALSE	FALSE	FALSE
Myc	0.00100028	0.00176149	0.00600157	FALSE	FALSE	FALSE
Hecw1	0.00100004	0.00100059	0.00100586	FALSE	FALSE	FALSE
Rbbp7	0.00100007	0.0010958	0.00109631	FALSE	FALSE	FALSE
Rbm25	0.00100004	0.00100983	0.0208177	FALSE	FALSE	FALSE
Ap3b2	0.00100009	0.00100151	0.0014918	FALSE	FALSE	FALSE
Dsg1c	0.00100003	0.00103538	0.0299315	FALSE	FALSE	FALSE
Phf2	0.00100008	0.00100188	0.00128086	FALSE	FALSE	FALSE
Flrt1	0.00100016	0.00100223	0.00104341	FALSE	FALSE	FALSE
Ostm1	0.00100013	0.00100063	0.00251328	FALSE	FALSE	FALSE
Amot	0.00100005	0.00100999	0.00198482	FALSE	FALSE	FALSE
Sgsm1	0.00100019	0.00100109	0.00228755	FALSE	FALSE	FALSE
Csrp2	0.00100037	0.00100199	0.0070385	FALSE	FALSE	FALSE
Pdilt	0.00100187	0.00104095	0.00633391	FALSE	FALSE	FALSE
Wdhd1	0.00100062	0.00100441	0.00102073	FALSE	FALSE	FALSE
Nol11	0.00100032	0.00100287	0.00100332	FALSE	FALSE	FALSE
Imp3	0.00100014	0.00100368	0.00107323	FALSE	FALSE	FALSE
Brdt	0.00100008	0.00100401	0.00477463	FALSE	FALSE	FALSE
Il1b	0.00100115	0.00111634	0.0240711	FALSE	FALSE	FALSE
Pde4a	0.00100014	0.0010198	0.0317636	FALSE	FALSE	FALSE
Fhdc1	0.00100023	0.0264849	0.00128935	FALSE	FALSE	FALSE
Mbd1	0.00100035	0.00185383	0.00289489	FALSE	FALSE	FALSE
Tmod1	0.001	0.00100288	0.00773181	FALSE	FALSE	FALSE
Twsg1	0.00100009	0.0010062	0.00700463	FALSE	FALSE	FALSE
Mark1	0.00100027	0.00100374	0.00117342	FALSE	FALSE	FALSE
Sh2b1	0.00100012	0.00100258	0.00471089	FALSE	FALSE	FALSE
Itpr3	0.00100033	0.00100388	0.00135188	FALSE	FALSE	FALSE
Il1r1	0.00100013	0.00129315	0.010245	FALSE	FALSE	FALSE
Ptn	0.00100035	0.0091463	0.0211375	FALSE	FALSE	FALSE
Lin7a	0.00100015	0.00103137	0.00717908	FALSE	FALSE	FALSE
Zic2	0.00100019	0.00101024	0.0732733	FALSE	FALSE	FALSE
Nwd2	0.00100001	0.00100412	0.0117811	FALSE	FALSE	FALSE
Gon4l	0.00100011	0.00100158	0.00753499	FALSE	FALSE	FALSE
Ap2b1	0.00100017	0.00100265	0.00378141	FALSE	FALSE	FALSE
Adrb1	0.00100007	0.00101153	0.00125432	FALSE	FALSE	FALSE
Meis1	0.00100084	0.00934315	0.00334181	FALSE	FALSE	FALSE
Stk39	0.00100006	0.001004	0.0020795	FALSE	FALSE	FALSE
Irf3	0.00100013	0.00100308	0.00393962	FALSE	FALSE	FALSE
Ctc1	0.00100022	0.00144986	0.00202796	FALSE	FALSE	FALSE
Tssk2	0.00100228	0.00113364	0.00146724	FALSE	FALSE	FALSE
Fcho1	0.0010001	0.00100334	0.00957185	FALSE	FALSE	FALSE
Flii	0.00100005	0.00100195	0.00100447	FALSE	FALSE	FALSE
Khnyn	0.00100015	0.0010073	0.0011203	FALSE	FALSE	FALSE
Brd8	0.00100024	0.00100074	0.00492415	FALSE	FALSE	FALSE
Inhba	0.00100033	0.00104686	0.0337813	FALSE	FALSE	FALSE
Grb2	0.00100003	0.00100183	0.00152181	FALSE	FALSE	FALSE
Nek8	0.00100053	0.00101015	0.0022882	FALSE	FALSE	FALSE
Sp7	0.00100294	0.00106979	0.00388757	FALSE	FALSE	FALSE
Bcr	0.00100001	0.00100287	0.00100001	FALSE	FALSE	FALSE
Wwtr1	0.00247488	0.00243119	0.0464505	FALSE	FALSE	FALSE
Eif3f	0.00100007	0.00215602	0.00101849	FALSE	FALSE	FALSE
Gria1	0.00100003	0.00139862	0.00289483	FALSE	FALSE	FALSE
Flot1	0.00100003	0.00100473	0.00146281	FALSE	FALSE	FALSE
Ube2w	0.00100003	0.00100282	0.00387602	FALSE	FALSE	FALSE
Rab18	0.00100003	0.0010009	0.00113237	FALSE	FALSE	FALSE
Kif22	0.00100136	0.00164379	0.0271449	FALSE	FALSE	FALSE
Cbln4	0.00100038	0.00103269	0.00458181	FALSE	FALSE	FALSE
Numa1	0.00100009	0.00100374	0.0156016	FALSE	FALSE	FALSE
Inhbb	0.00100011	0.00101759	0.00635801	FALSE	FALSE	FALSE
Rnf14	0.00100013	0.001002	0.00117112	FALSE	FALSE	FALSE
Arf5	0.00100024	0.00100119	0.00108344	FALSE	FALSE	FALSE
Nol3	0.00100001	0.00100443	0.00139754	FALSE	FALSE	FALSE
Armc8	0.00100003	0.00100157	0.00118878	FALSE	FALSE	FALSE
Fen1	0.00100057	0.00100178	0.00100881	FALSE	FALSE	FALSE
Pax1	0.00100083	0.00103372	0.00188148	FALSE	FALSE	FALSE
Dnmt1	0.00100037	0.00841663	0.0307589	FALSE	FALSE	FALSE
Il16	0.00100044	0.00377442	0.00100982	FALSE	FALSE	FALSE
Rap1b	0.00100018	0.00414344	0.00223116	FALSE	FALSE	FALSE
Med14	0.00100013	0.00136165	0.00429036	FALSE	FALSE	FALSE
Egln1	0.00100038	0.00100165	0.00980729	FALSE	FALSE	FALSE
Fgf2	0.00100097	0.00100001	0.00656414	FALSE	FALSE	FALSE
Lsamp	0.00100022	0.00100529	0.013452	FALSE	FALSE	FALSE
Dpp4	0.00100056	0.00100611	0.106386	FALSE	FALSE	FALSE
Mov10	0.0243629	0.00101091	0.0446601	FALSE	FALSE	FALSE
Gas1	0.00100033	0.0024783	0.0119725	FALSE	FALSE	FALSE
Il11	0.00100149	0.0010814	0.0371803	FALSE	FALSE	FALSE
Herc2	0.00100032	0.00296839	0.0339034	FALSE	FALSE	FALSE
Trpc4	0.00100019	0.0010074	0.00242741	FALSE	FALSE	FALSE
Ackr3	0.00100052	0.0010024	0.00107868	FALSE	FALSE	FALSE
Rnf25	0.00100022	0.00100025	0.00185671	FALSE	FALSE	FALSE
Rxra	0.00100012	0.00354898	0.0100837	FALSE	FALSE	FALSE
Speg	0.00100003	0.00100354	0.0182094	FALSE	FALSE	FALSE
Ctu1	0.0010003	0.0034088	0.00115891	FALSE	FALSE	FALSE
Lonp2	0.00100002	0.00100039	0.00184832	FALSE	FALSE	FALSE
Leng8	0.00100002	0.00100149	0.0583034	FALSE	FALSE	FALSE
Nup98	0.00100029	0.00100072	0.00142111	FALSE	FALSE	FALSE
Acad9	0.00100007	0.00100062	0.00105477	FALSE	FALSE	FALSE
Hook2	0.00100023	0.00100737	0.0149422	FALSE	FALSE	FALSE
Rpap3	0.00100005	0.0010021	0.00102713	FALSE	FALSE	FALSE
Cstf3	0.00100016	0.00100831	0.00144396	FALSE	FALSE	FALSE
Rgs3	0.00100006	0.00100136	0.00100103	FALSE	FALSE	FALSE
Med1	0.00100024	0.00100275	0.00153121	FALSE	FALSE	FALSE
Stap1	0.00100202	0.00102181	0.0229791	FALSE	FALSE	FALSE
Ngf	0.00100049	0.00221527	0.0532224	FALSE	FALSE	FALSE
Wac	0.00100014	0.00105641	0.0223969	FALSE	FALSE	FALSE
Ncald	0.00100007	0.00158384	0.00950022	FALSE	FALSE	FALSE
Bank1	0.00100012	0.00101104	0.00146757	FALSE	FALSE	FALSE
Tbx21	0.00100008	0.00100907	0.00227539	FALSE	FALSE	FALSE
Mtmr3	0.00100008	0.00100164	0.00150781	FALSE	FALSE	FALSE
Bfsp2	0.00100037	0.00101319	0.0140272	FALSE	FALSE	FALSE
Abhd5	0.00100002	0.00100445	0.050531	FALSE	FALSE	FALSE
Zbtb9	0.0010001	0.00100191	0.0102364	FALSE	FALSE	FALSE
Ascc1	0.00100039	0.00100794	0.00753704	FALSE	FALSE	FALSE
Cemip	0.00588177	0.0010119	0.00287552	FALSE	FALSE	FALSE
Pls1	0.00100023	0.00101299	0.012158	FALSE	FALSE	FALSE
Fbxw8	0.00100003	0.00100077	0.00185789	FALSE	FALSE	FALSE
Pi4ka	0.00100012	0.00128395	0.00269172	FALSE	FALSE	FALSE
Rbm15	0.00100001	0.00100377	0.00836009	FALSE	FALSE	FALSE
Mafg	0.00100009	0.00100023	0.0031683	FALSE	FALSE	FALSE
Rrn3	0.00100008	0.00100104	0.00259182	FALSE	FALSE	FALSE
Clk2	0.00100015	0.00100062	0.0155073	FALSE	FALSE	FALSE
Nova1	0.001001	0.00101366	0.00763305	FALSE	FALSE	FALSE
Sdha	0.00100001	0.00100201	0.00101749	FALSE	FALSE	FALSE
Mcts1	0.00100029	0.00100789	0.00599983	FALSE	FALSE	FALSE
Efna5	0.00100025	0.00100121	0.00455834	FALSE	FALSE	FALSE
Nek7	0.00100015	0.00126368	0.00283967	FALSE	FALSE	FALSE
Wnt9a	0.00100011	0.00100489	0.00142555	FALSE	FALSE	FALSE
Snd1	0.00100015	0.00100166	0.00118204	FALSE	FALSE	FALSE
Uck1	0.00100016	0.00100632	0.00104539	FALSE	FALSE	FALSE
Scn8a	0.00100001	0.00100749	0.0179777	FALSE	FALSE	FALSE
Trpc6	0.00100041	0.00100725	0.00112364	FALSE	FALSE	FALSE
Vps16	0.00100028	0.00100016	0.00299354	FALSE	FALSE	FALSE
Vgll4	0.00303945	0.0143562	0.00496575	FALSE	FALSE	FALSE
Il34	0.00100002	0.0185067	0.00100002	FALSE	FALSE	FALSE
Ntng1	0.00100027	0.00100655	0.00103346	FALSE	FALSE	FALSE
Maf	0.00163672	0.00100314	0.00503007	FALSE	FALSE	FALSE
Nlrc4	0.00100222	0.00104197	0.0138078	FALSE	FALSE	FALSE
Erbb2	0.00100006	0.00100872	0.00888604	FALSE	FALSE	FALSE
Htr5b	0.0010001	0.00101775	0.00136933	FALSE	FALSE	FALSE
Vdac2	0.00100015	0.00100123	0.0109627	FALSE	FALSE	FALSE
Eif3b	0.00100017	0.00100373	0.00751082	FALSE	FALSE	FALSE
Sf3b6	0.00100026	0.00100815	0.00959323	FALSE	FALSE	FALSE
Egr2	0.00100077	0.00102066	0.00366875	FALSE	FALSE	FALSE
Pdk4	0.00100086	0.00101599	0.00121141	FALSE	FALSE	FALSE
Cd47	0.00100013	0.0010018	0.00230427	FALSE	FALSE	FALSE
Atf6b	0.00100009	0.00100266	0.00130469	FALSE	FALSE	FALSE
Tgtp1	0.0744925	0.0010426	0.00956441	FALSE	FALSE	FALSE
Palld	0.00100024	0.00327454	0.00123116	FALSE	FALSE	FALSE
Cd80	0.00100025	0.00105119	0.0858618	FALSE	FALSE	FALSE
Nptx1	0.00836836	0.179834	0.00617501	FALSE	TRUE	FALSE
Etv3	0.00100036	0.00100305	0.00149533	FALSE	FALSE	FALSE
Ston2	0.00100008	0.00100319	0.00444372	FALSE	FALSE	FALSE
Ppm1a	0.00100007	0.00100049	0.00125038	FALSE	FALSE	FALSE
Ascl3	0.0010018	0.00103639	0.0156379	FALSE	FALSE	FALSE
Rab32	0.00100039	0.0010208	0.00127308	FALSE	FALSE	FALSE
Nipbl	0.00100005	0.00100514	0.00100004	FALSE	FALSE	FALSE
Wsb1	0.00100019	0.00101366	0.0394404	FALSE	FALSE	FALSE
Pak2	0.00100007	0.0010008	0.00645424	FALSE	FALSE	FALSE
Cpne6	0.00100002	0.00100055	0.00170269	FALSE	FALSE	FALSE
Yaf2	0.0010003	0.00141464	0.0176278	FALSE	FALSE	FALSE
Sox5	0.00100035	0.00535654	0.00105262	FALSE	FALSE	FALSE
Daam1	0.00100002	0.00141115	0.00111678	FALSE	FALSE	FALSE
Lpxn	0.0010002	0.00101739	0.00971945	FALSE	FALSE	FALSE
Taf5	0.00100043	0.00100124	0.0166519	FALSE	FALSE	FALSE
Cav1	0.00100031	0.00100693	0.0047054	FALSE	FALSE	FALSE
Sltm	0.00100005	0.00100019	0.0221263	FALSE	FALSE	FALSE
Magi3	0.00100004	0.00100263	0.00147079	FALSE	FALSE	FALSE
Nid2	0.00100097	0.00102106	0.0046116	FALSE	FALSE	FALSE
Srp68	0.00100002	0.00100044	0.00107547	FALSE	FALSE	FALSE
Lyz2	0.00100007	0.00321433	0.0302113	FALSE	FALSE	FALSE
Anks6	0.00100011	0.00100769	0.0150731	FALSE	FALSE	FALSE
Eri3	0.00100002	0.00100275	0.00110286	FALSE	FALSE	FALSE
Kif17	0.00100083	0.00473777	0.0101606	FALSE	FALSE	FALSE
B9d1	0.0010001	0.00100441	0.00227808	FALSE	FALSE	FALSE
Xirp2	0.0272557	0.0574354	0.0256482	FALSE	FALSE	FALSE
Telo2	0.00495606	0.00923426	0.0366824	FALSE	FALSE	FALSE
Dazl	0.00100116	0.00102175	0.00312784	FALSE	FALSE	FALSE
Plcb1	0.00100026	0.00540632	0.00101119	FALSE	FALSE	FALSE
Pwp1	0.00100005	0.00100042	0.00140699	FALSE	FALSE	FALSE
Praf2	0.00100003	0.0010035	0.0253669	FALSE	FALSE	FALSE
Lamp1	0.0010002	0.00100105	0.0153046	FALSE	FALSE	FALSE
Map1s	0.00100029	0.00100705	0.0011837	FALSE	FALSE	FALSE
Utp6	0.00100017	0.00100713	0.0028233	FALSE	FALSE	FALSE
Sugp1	0.00100036	0.00100165	0.00121848	FALSE	FALSE	FALSE
Myh9	0.00100027	0.00355124	0.00916218	FALSE	FALSE	FALSE
Gnpat	0.00100019	0.00100235	0.0010897	FALSE	FALSE	FALSE
Neo1	0.00100008	0.00100783	0.00414237	FALSE	FALSE	FALSE
Tbce	0.0010002	0.00100655	0.0039061	FALSE	FALSE	FALSE
Net1	0.00100038	0.0237647	0.00758279	FALSE	FALSE	FALSE
Tie1	0.0010001	0.00100564	0.00524701	FALSE	FALSE	FALSE
Wdr19	0.00100041	0.00163353	0.0128629	FALSE	FALSE	FALSE
Srprb	0.00100019	0.00123218	0.0167036	FALSE	FALSE	FALSE
Foxo1	0.0010001	0.0010075	0.00908037	FALSE	FALSE	FALSE
Foxc1	0.00100009	0.0010125	0.0603848	FALSE	FALSE	FALSE
Wsb2	0.00100019	0.00125386	0.00407429	FALSE	FALSE	FALSE
Rab26	0.00100021	0.0010005	0.0614504	FALSE	FALSE	FALSE
Obscn	0.00100048	0.00101698	0.00108386	FALSE	FALSE	FALSE
Dll4	0.00100024	0.00100096	0.00100001	FALSE	FALSE	FALSE
Irf9	0.0815406	0.00101965	0.0117314	FALSE	FALSE	FALSE
Foxk1	0.00100002	0.00100627	0.0104739	FALSE	FALSE	FALSE
Smtn	0.00100021	0.00102292	0.00243635	FALSE	FALSE	FALSE
Pbx1	0.00100002	0.00100006	0.00115859	FALSE	FALSE	FALSE
Rab34	0.00100042	0.00100539	0.00930817	FALSE	FALSE	FALSE
Thoc1	0.00100011	0.00100679	0.032869	FALSE	FALSE	FALSE
Akap8	0.00100003	0.00100312	0.0361014	FALSE	FALSE	FALSE
Ube2s	0.00100002	0.00100544	0.00142704	FALSE	FALSE	FALSE
Rhoh	0.00100079	0.00107603	0.00535952	FALSE	FALSE	FALSE
Ndel1	0.001	0.0010035	0.00104682	FALSE	FALSE	FALSE
Ier5	0.00100032	0.00149117	0.00267373	FALSE	FALSE	FALSE
Isg15	1	0.00100366	0.00223307	TRUE	FALSE	FALSE
Ngdn	0.00100039	0.00100433	0.00164728	FALSE	FALSE	FALSE
Padi2	0.00262587	0.00100869	0.020033	FALSE	FALSE	FALSE
Cnot4	0.00100005	0.00100549	0.00846538	FALSE	FALSE	FALSE
Aatf	0.00100022	0.00100992	0.00144024	FALSE	FALSE	FALSE
Cys1	0.00100125	0.0279305	0.0342408	FALSE	FALSE	FALSE
Smad6	0.00100046	0.00220102	0.0189866	FALSE	FALSE	FALSE
Cebpz	0.00100005	0.00100155	0.00816178	FALSE	FALSE	FALSE
Mcl1	0.00100006	0.00172877	0.0163773	FALSE	FALSE	FALSE
Mpc2	0.00330418	0.038721	0.0619019	FALSE	FALSE	FALSE
Cdk2	0.00100023	0.00143564	0.00371618	FALSE	FALSE	FALSE
Ddx51	0.00100003	0.00100981	0.00598353	FALSE	FALSE	FALSE
Lnp	0.00100004	0.0010015	0.00101065	FALSE	FALSE	FALSE
Nos3	0.00100002	0.00101405	0.0204869	FALSE	FALSE	FALSE
Ccnd2	0.00100005	0.0291849	0.00683656	FALSE	FALSE	FALSE
Abcb7	0.00100003	0.00100321	0.0012022	FALSE	FALSE	FALSE
Slk	0.00100023	0.00366969	0.00705365	FALSE	FALSE	FALSE
Emd	0.00100002	0.00100475	0.00111472	FALSE	FALSE	FALSE
Ppie	0.00100018	0.00101328	0.00775758	FALSE	FALSE	FALSE
Vgll2	0.0010001	0.00102238	0.00797239	FALSE	FALSE	FALSE
Scml4	0.0010005	0.00100675	0.012347	FALSE	FALSE	FALSE
Nav1	0.00100009	0.0152527	0.0189263	FALSE	FALSE	FALSE
Ephb3	0.00100066	0.00100537	0.0217554	FALSE	FALSE	FALSE
Nup85	0.00100039	0.00100378	0.00602782	FALSE	FALSE	FALSE
Pcsk4	0.00100207	0.00103004	0.057059	FALSE	FALSE	FALSE
Sfxn3	0.00100013	0.00100115	0.0191874	FALSE	FALSE	FALSE
Tle4	0.00100005	0.00100043	0.00115959	FALSE	FALSE	FALSE
Atg3	0.0010002	0.00100388	0.00103852	FALSE	FALSE	FALSE
Stat1	0.243371	0.0038629	0.00103829	TRUE	FALSE	FALSE
Blnk	0.00100019	0.0010002	0.00156894	FALSE	FALSE	FALSE
Hipk2	0.00100053	0.00101421	0.00239722	FALSE	FALSE	FALSE
Bst2	0.16377	0.00101005	0.0131362	TRUE	FALSE	FALSE
Bag5	0.00100003	0.00100519	0.00332017	FALSE	FALSE	FALSE
Saal1	0.00100029	0.00101513	0.00111573	FALSE	FALSE	FALSE
Igf1r	0.00100027	0.00100256	0.0234456	FALSE	FALSE	FALSE
Nedd8	0.00100011	0.0010059	0.0168634	FALSE	FALSE	FALSE
Psme1	0.00290906	0.00100556	0.00193475	FALSE	FALSE	FALSE
Tnpo1	0.00100007	0.00113324	0.00115842	FALSE	FALSE	FALSE
Ttc23	0.00100087	0.00119586	0.00299988	FALSE	FALSE	FALSE
Ddx50	0.00100008	0.00100202	0.00228113	FALSE	FALSE	FALSE
Cbx4	0.00100009	0.00100129	0.0188938	FALSE	FALSE	FALSE
Scrn1	0.00100001	0.00100495	0.00100217	FALSE	FALSE	FALSE
Dffa	0.00100013	0.00128207	0.00299845	FALSE	FALSE	FALSE
Myl9	0.00150222	0.00265994	0.0333066	FALSE	FALSE	FALSE
Arf3	0.00100007	0.0010006	0.001082	FALSE	FALSE	FALSE
Lef1	0.00100094	0.00101856	0.00163145	FALSE	FALSE	FALSE
Cwc22	0.00100013	0.00138926	0.00776007	FALSE	FALSE	FALSE
Pa2g4	0.00100006	0.00100484	0.00106677	FALSE	FALSE	FALSE
Magi1	0.00100003	0.00100377	0.00168193	FALSE	FALSE	FALSE
Hes6	0.001	0.00100549	0.00201031	FALSE	FALSE	FALSE
Taf1c	0.00100009	0.00101355	0.00137556	FALSE	FALSE	FALSE
Cul5	0.00100008	0.00319729	0.00118297	FALSE	FALSE	FALSE
Smug1	0.00100023	0.00100214	0.00279305	FALSE	FALSE	FALSE
Per1	0.00100086	0.00999825	0.0198194	FALSE	FALSE	FALSE
Ldb1	0.001	0.00100554	0.0101142	FALSE	FALSE	FALSE
Wdr61	0.00100012	0.0010001	0.00320213	FALSE	FALSE	FALSE
Polk	0.00100027	0.0010166	0.00182369	FALSE	FALSE	FALSE
Rbm3	0.00499868	0.00100566	0.0660718	FALSE	FALSE	FALSE
Bub1	0.00100107	0.00637291	0.00777122	FALSE	FALSE	FALSE
Rbm12	0.00100017	0.00100449	0.00730425	FALSE	FALSE	FALSE
Ncoa2	0.00100004	0.00100138	0.00111712	FALSE	FALSE	FALSE
Postn	0.0352043	0.185028	0.0126385	FALSE	FALSE	FALSE
Aak1	0.00100006	0.00100089	0.0113722	FALSE	FALSE	FALSE
Rrp1	0.00100005	0.00100011	0.00586088	FALSE	FALSE	FALSE
Plcl1	0.00100026	0.0010027	0.00113949	FALSE	FALSE	FALSE
Ddx28	0.00100028	0.00100705	0.0033301	FALSE	FALSE	FALSE
Snx27	0.00100003	0.00100152	0.00168948	FALSE	FALSE	FALSE
Mgst3	0.0010003	0.0485298	0.0162791	FALSE	FALSE	FALSE
Wdr1	0.00100009	0.0010053	0.0169031	FALSE	FALSE	FALSE
Hsf1	0.00100005	0.00143826	0.00325406	FALSE	FALSE	FALSE
Syt2	0.00100011	0.00100068	0.00186426	FALSE	FALSE	FALSE
Cnot2	0.00100026	0.00100448	0.0027237	FALSE	FALSE	FALSE
Brd7	0.00100016	0.00100238	0.00184357	FALSE	FALSE	FALSE
Med4	0.00100033	0.00100385	0.00237122	FALSE	FALSE	FALSE
Aagab	0.00100014	0.00100622	0.00168641	FALSE	FALSE	FALSE
Taf3	0.00100003	0.00101253	0.00285019	FALSE	FALSE	FALSE
Pld6	0.00100028	0.00102345	0.00138212	FALSE	FALSE	FALSE
Pno1	0.00100009	0.0010046	0.0144901	FALSE	FALSE	FALSE
Dlg2	0.00100027	0.00100465	0.0045195	FALSE	FALSE	FALSE
Cxxc1	0.0010001	0.00100821	0.0103559	FALSE	FALSE	FALSE
Taf9	0.00100001	0.00100212	0.0154846	FALSE	FALSE	FALSE
Wwc2	0.00100009	0.00100145	0.0172585	FALSE	FALSE	FALSE
Dctn2	0.00100015	0.00100093	0.0010003	FALSE	FALSE	FALSE
Timd4	0.0216102	0.00108226	0.387175	FALSE	FALSE	FALSE
Cry2	0.00100023	0.00261997	0.00713449	FALSE	FALSE	FALSE
Elmo2	0.00100002	0.00100094	0.00199843	FALSE	FALSE	FALSE
Sde2	0.00100035	0.00135237	0.0178647	FALSE	FALSE	FALSE
Tmco1	0.00100011	0.00100052	0.00163417	FALSE	FALSE	FALSE
Cenpo	0.00100021	0.00100205	0.0381224	FALSE	FALSE	FALSE
Uba1y	0.00100073	0.00100921	0.00108341	FALSE	FALSE	FALSE
Hacd2	0.00100001	0.00172991	0.00131837	FALSE	FALSE	FALSE
Irs2	0.00100019	0.00100995	0.00281656	FALSE	FALSE	FALSE
Cav3	0.0010054	0.00103096	0.0861944	FALSE	FALSE	FALSE
Pde6a	0.00100085	0.00989989	0.0115102	FALSE	FALSE	FALSE
Gdf9	0.00100052	0.00100294	0.0109747	FALSE	FALSE	FALSE
Smad1	0.00100003	0.00100066	0.00100433	FALSE	FALSE	FALSE
Ern1	0.00100059	0.00100203	0.00329921	FALSE	FALSE	FALSE
Ago2	0.00100027	0.0046411	0.0012068	FALSE	FALSE	FALSE
Cers4	0.00100006	0.0010046	0.00132997	FALSE	FALSE	FALSE
Parp9	0.332181	0.028297	0.0325744	TRUE	FALSE	FALSE
Zfpl1	0.00100011	0.00160459	0.00588539	FALSE	FALSE	FALSE
Gnat2	0.00100219	0.00277868	0.00111091	FALSE	FALSE	FALSE
Adam9	0.00100006	0.0010051	0.0013036	FALSE	FALSE	FALSE
Shc3	0.00100027	0.00101158	0.00522544	FALSE	FALSE	FALSE
Ahrr	0.00100105	0.00102573	0.00455043	FALSE	FALSE	FALSE
Chmp5	0.00100004	0.0010032	0.00188764	FALSE	FALSE	FALSE
Trpc3	0.00100005	0.00100347	0.00186853	FALSE	FALSE	FALSE
Fez2	0.00100013	0.00100433	0.0023227	FALSE	FALSE	FALSE
Txnl1	0.00100013	0.0010011	0.00814894	FALSE	FALSE	FALSE
Mknk1	0.00100016	0.00100049	0.0125672	FALSE	FALSE	FALSE
Clu	0.00100014	0.00100463	0.00114607	FALSE	FALSE	FALSE
Grin1	0.00100008	0.00115937	0.00821756	FALSE	FALSE	FALSE
Hmgcl	0.00100007	0.00100209	0.0010168	FALSE	FALSE	FALSE
Pde1a	0.00100043	0.00101721	0.102545	FALSE	FALSE	FALSE
Taf1	0.00100012	0.00100486	0.00486968	FALSE	FALSE	FALSE
Hes1	0.00100025	0.00100432	0.00464346	FALSE	FALSE	FALSE
Kcnq2	0.00100004	0.0010038	0.0160297	FALSE	FALSE	FALSE
Ap2m1	0.00100009	0.00100246	0.00196666	FALSE	FALSE	FALSE
Lat	0.00100304	0.00107809	0.0105685	FALSE	FALSE	FALSE
Cep55	0.00100144	0.00106132	0.0067984	FALSE	FALSE	FALSE
Eif3l	0.00100004	0.00100506	0.002296	FALSE	FALSE	FALSE
Rspo2	0.00100028	0.0053058	0.00235051	FALSE	FALSE	FALSE
Actn3	0.00100143	0.00102813	0.0126664	FALSE	FALSE	FALSE
Nbea	0.00100002	0.00115719	0.00533251	FALSE	FALSE	FALSE
Trpc1	0.00100009	0.00100792	0.00100039	FALSE	FALSE	FALSE
Lrfn1	0.00100006	0.00100731	0.00272101	FALSE	FALSE	FALSE
Dhrs4	0.0010004	0.00101456	0.00140198	FALSE	FALSE	FALSE
Lrrc4	0.00100006	0.00100949	0.046634	FALSE	FALSE	FALSE
Cog8	0.0010002	0.00100453	0.00417933	FALSE	FALSE	FALSE
Map6	0.00100003	0.00100114	0.0044795	FALSE	FALSE	FALSE
Tpx2	0.00100001	0.00426334	0.0194769	FALSE	FALSE	FALSE
Itm2a	0.0010007	0.00100569	0.00986835	FALSE	FALSE	FALSE
Cdk14	0.00100004	0.00100554	0.00111831	FALSE	FALSE	FALSE
Itih2	0.00100119	0.00101993	0.00670741	FALSE	FALSE	FALSE
Trem2	0.00100152	0.0018638	0.00693963	FALSE	FALSE	FALSE
Mitd1	0.00100047	0.00101677	0.00315238	FALSE	FALSE	FALSE
Fmn1	0.00100014	0.00135269	0.00102929	FALSE	FALSE	FALSE
Emc1	0.0010001	0.00100622	0.00407643	FALSE	FALSE	FALSE
Ryr1	0.00100202	0.00104209	0.00436145	FALSE	FALSE	FALSE
Cdk13	0.00100005	0.00100566	0.00106263	FALSE	FALSE	FALSE
Lsr	0.00100065	0.00101102	0.00245125	FALSE	FALSE	FALSE
Bud31	0.00100018	0.00100163	0.00131713	FALSE	FALSE	FALSE
Wdr75	0.00100011	0.0010001	0.00216867	FALSE	FALSE	FALSE
Kctd3	0.00100022	0.00100115	0.00249008	FALSE	FALSE	FALSE
Strn3	0.00100003	0.00100133	0.0015891	FALSE	FALSE	FALSE
Rfx1	0.00100004	0.00100245	0.0178657	FALSE	FALSE	FALSE
Sytl5	0.00100202	0.00100283	0.00100272	FALSE	FALSE	FALSE
Cabyr	0.00100012	0.00101957	0.00100359	FALSE	FALSE	FALSE
Matn4	0.0116187	0.00280847	0.00290028	FALSE	FALSE	FALSE
Tbcd	0.00100014	0.00100613	0.00126099	FALSE	FALSE	FALSE
Phf19	0.00100274	0.00143606	0.0102755	FALSE	FALSE	FALSE
Nop9	0.00100038	0.00100591	0.00570579	FALSE	FALSE	FALSE
Utp18	0.00100004	0.00101445	0.0248552	FALSE	FALSE	FALSE
Uimc1	0.00100017	0.00101433	0.00448887	FALSE	FALSE	FALSE
Enah	0.00100011	0.00100104	0.0059237	FALSE	FALSE	FALSE
Gpr18	0.00100162	0.00104148	0.00292813	FALSE	FALSE	FALSE
Stx1b	0.00100005	0.00100445	0.0010411	FALSE	FALSE	FALSE
Blm	0.00100001	0.00100662	0.00388566	FALSE	FALSE	FALSE
Lsm4	0.00100024	0.00100551	0.00144563	FALSE	FALSE	FALSE
Zyx	0.00100004	0.00100018	0.00206342	FALSE	FALSE	FALSE
Mypop	0.00100017	0.0010072	0.0026411	FALSE	FALSE	FALSE
Uchl3	0.00100009	0.00181646	0.0322979	FALSE	FALSE	FALSE
Blvrb	0.00100002	0.00100499	0.0069336	FALSE	FALSE	FALSE
Rhoq	0.00100005	0.00100382	0.00217998	FALSE	FALSE	FALSE
Clcn7	0.00100019	0.00100529	0.00175256	FALSE	FALSE	FALSE
Tob2	0.00100033	0.00100914	0.0158226	FALSE	FALSE	FALSE
Ercc6	0.00100024	0.00100875	0.0048883	FALSE	FALSE	FALSE
Srpk3	0.00100033	0.0010116	0.0558386	FALSE	FALSE	FALSE
Spag7	0.00100024	0.00484558	0.00816626	FALSE	FALSE	FALSE
Rbms2	0.00100075	0.0010058	0.0100214	FALSE	FALSE	FALSE
Pmf1	0.00100056	0.00100788	0.00535027	FALSE	FALSE	FALSE
Asf1a	0.00100011	0.00100978	0.00101193	FALSE	FALSE	FALSE
Gem	0.00100146	0.0122568	0.00590141	FALSE	FALSE	FALSE
Apbb2	0.00100013	0.00100695	0.00108279	FALSE	FALSE	FALSE
Ttc9b	0.00100009	0.00100318	0.0145513	FALSE	FALSE	FALSE
Pdk2	0.00100011	0.00100402	0.00100002	FALSE	FALSE	FALSE
Cpt1a	0.00100002	0.00100311	0.00356233	FALSE	FALSE	FALSE
Pacrg	0.00100033	0.00100104	0.00101303	FALSE	FALSE	FALSE
Cd180	0.00100084	0.00100366	0.00102963	FALSE	FALSE	FALSE
Traf5	0.00100014	0.00102389	0.00293224	FALSE	FALSE	FALSE
Pspc1	0.0010002	0.00100039	0.00173001	FALSE	FALSE	FALSE
Rsph1	0.00100077	0.00102226	0.0381863	FALSE	FALSE	FALSE
Ank1	0.00100004	0.00100304	0.0014	FALSE	FALSE	FALSE
Plcg1	0.00100027	0.00114313	0.010706	FALSE	FALSE	FALSE
Ehd4	0.00100006	0.00100026	0.00131736	FALSE	FALSE	FALSE
Ppm1l	0.0010001	0.00100413	0.00932358	FALSE	FALSE	FALSE
Nkd2	0.00100051	0.00101985	0.00118859	FALSE	FALSE	FALSE
Sox9	0.00100004	0.00102103	0.00115914	FALSE	FALSE	FALSE
Hspb6	0.00100076	0.0588796	0.00717336	FALSE	FALSE	FALSE
Lmtk2	0.0010002	0.00139733	0.00100103	FALSE	FALSE	FALSE
Ctcf	0.00100029	0.00100094	0.00123612	FALSE	FALSE	FALSE
Mtcl1	0.00100009	0.00100026	0.0010169	FALSE	FALSE	FALSE
Lin54	0.00100001	0.00101058	0.00119314	FALSE	FALSE	FALSE
Mdm2	0.00100011	0.00100584	0.00109641	FALSE	FALSE	FALSE
Wnk3	0.00100029	0.00100002	0.0105644	FALSE	FALSE	FALSE
Hlf	0.00100046	0.00101253	0.0314607	FALSE	FALSE	FALSE
Adck5	0.00100075	0.00101004	0.00418893	FALSE	FALSE	FALSE
Sox17	0.00100007	0.00101281	0.0195599	FALSE	FALSE	FALSE
Rragb	0.00100006	0.00100305	0.00313967	FALSE	FALSE	FALSE
Hibch	0.0010001	0.00100239	0.00364192	FALSE	FALSE	FALSE
Ptma	0.00100022	0.00100199	0.00783479	FALSE	FALSE	FALSE
Scyl1	0.00100005	0.00100106	0.0011704	FALSE	FALSE	FALSE
Cers5	0.0010003	0.0010042	0.00322077	FALSE	FALSE	FALSE
Ehd3	0.00100017	0.0109972	0.00808216	FALSE	FALSE	FALSE
Vamp3	0.00100029	0.00100716	0.0199077	FALSE	FALSE	FALSE
Wdr37	0.00100035	0.0103596	0.00177842	FALSE	FALSE	FALSE
Med18	0.00100061	0.00100263	0.00384461	FALSE	FALSE	FALSE
Gnl3	0.00100034	0.00100975	0.0122384	FALSE	FALSE	FALSE
Ltbp1	0.00100079	0.00100169	0.0165266	FALSE	FALSE	FALSE
Rtn3	0.00100002	0.00100343	0.00107443	FALSE	FALSE	FALSE
Nsf	0.00100004	0.00100158	0.00120383	FALSE	FALSE	FALSE
Sgk3	0.00100004	0.00100173	0.00103906	FALSE	FALSE	FALSE
Ice1	0.00100001	0.00100575	0.00399113	FALSE	FALSE	FALSE
Rgs2	0.00100017	0.00100707	0.00381837	FALSE	FALSE	FALSE
Sfr1	0.00100009	0.00100321	0.00205755	FALSE	FALSE	FALSE
Fgd4	0.00100023	0.00100764	0.00100683	FALSE	FALSE	FALSE
Ell	0.00100022	0.00100109	0.00492244	FALSE	FALSE	FALSE
Abcg2	0.00100008	0.00610673	0.0105889	FALSE	FALSE	FALSE
Rab14	0.00100007	0.00100072	0.00161492	FALSE	FALSE	FALSE
Shc2	0.00100016	0.00100432	0.00213873	FALSE	FALSE	FALSE
Dmxl1	0.00100009	0.00100263	0.00731502	FALSE	FALSE	FALSE
Tdrd6	0.00100019	0.00102204	0.00405995	FALSE	FALSE	FALSE
Tbcb	0.00100013	0.00169365	0.00696089	FALSE	FALSE	FALSE
Tox3	0.00100011	0.00100443	0.00171408	FALSE	FALSE	FALSE
Fhl1	0.00100004	0.00100037	0.00587343	FALSE	FALSE	FALSE
Birc5	0.00100045	0.00100949	0.0333594	FALSE	FALSE	FALSE
Lrp8	0.00100037	0.0425293	0.0250061	FALSE	FALSE	FALSE
Atp4a	0.00100258	0.00110563	0.0360905	FALSE	FALSE	FALSE
Ddx3x	0.00100001	0.00100127	0.00105296	FALSE	FALSE	FALSE
Foxq1	0.00100126	0.00103951	0.0173594	FALSE	FALSE	FALSE
Lmx1b	0.0010015	0.00105421	0.00837553	FALSE	FALSE	FALSE
Cpsf2	0.00100021	0.00100533	0.00139958	FALSE	FALSE	FALSE
Wdr47	0.00100016	0.0015121	0.00106875	FALSE	FALSE	FALSE
Hdac5	0.00100019	0.00434458	0.00110732	FALSE	FALSE	FALSE
Cstl1	0.00100259	0.00944817	0.0252988	FALSE	FALSE	FALSE
Nrep	0.0486234	0.0689011	0.0403519	FALSE	FALSE	FALSE
Klf2	0.0010004	0.00100111	0.00441576	FALSE	FALSE	FALSE
Nup35	0.00100047	0.00100143	0.00103345	FALSE	FALSE	FALSE
Ppib	0.00100003	0.00100534	0.0153604	FALSE	FALSE	FALSE
Sp2	0.00100027	0.00105456	0.001012	FALSE	FALSE	FALSE
Cep57	0.00100046	0.00100087	0.0103175	FALSE	FALSE	FALSE
Gdf11	0.00100021	0.00100817	0.0108144	FALSE	FALSE	FALSE
Slfn9	0.0731498	0.00263339	0.002651	FALSE	FALSE	FALSE
Irf6	0.00100023	0.0010087	0.00175808	FALSE	FALSE	FALSE
Herc4	0.00100009	0.00126686	0.00310736	FALSE	FALSE	FALSE
Cenpb	0.00100008	0.00100057	0.00114929	FALSE	FALSE	FALSE
Mkln1	0.00100021	0.0010025	0.00143816	FALSE	FALSE	FALSE
Kcnt1	0.00100019	0.0010009	0.0334836	FALSE	FALSE	FALSE
Sgcd	0.00100018	0.00100347	0.0198633	FALSE	FALSE	FALSE
E2f5	0.00100011	0.00184217	0.00169436	FALSE	FALSE	FALSE
Mlxip	0.00100008	0.00100291	0.0276097	FALSE	FALSE	FALSE
Cmya5	0.00100122	0.00101817	0.00179573	FALSE	FALSE	FALSE
Acot9	0.00100007	0.00100129	0.00629106	FALSE	FALSE	FALSE
Pcna	0.0010001	0.00100472	0.00524893	FALSE	FALSE	FALSE
Insrr	0.00100036	0.0031171	0.052304	FALSE	FALSE	FALSE
Ocrl	0.00100002	0.00100275	0.00178003	FALSE	FALSE	FALSE
Prlr	0.0010001	0.01094	0.00101291	FALSE	FALSE	FALSE
Scn9a	0.00100019	0.0048174	0.00985687	FALSE	FALSE	FALSE
Ccne1	0.0010003	0.00122372	0.00356222	FALSE	FALSE	FALSE
Eya3	0.00100004	0.00100036	0.00102049	FALSE	FALSE	FALSE
Arf4	0.001	0.00102013	0.0208968	FALSE	FALSE	FALSE
Abcd1	0.00100043	0.00328735	0.00107584	FALSE	FALSE	FALSE
Pim2	0.00100003	0.0010065	0.014639	FALSE	FALSE	FALSE
Rab6b	0.00100002	0.00100037	0.00100002	FALSE	FALSE	FALSE
Brpf1	0.00100008	0.00100137	0.00108444	FALSE	FALSE	FALSE
Rit2	0.00100005	0.00100427	0.00305787	FALSE	FALSE	FALSE
Dhx33	0.00100021	0.00100686	0.00116658	FALSE	FALSE	FALSE
Mkrn3	0.00100243	0.00104767	0.0131552	FALSE	FALSE	FALSE
Pak1	0.00100022	0.00100093	0.00308996	FALSE	FALSE	FALSE
Ralb	0.0010001	0.00100248	0.00110529	FALSE	FALSE	FALSE
Lmna	0.00100009	0.00100349	0.00620724	FALSE	FALSE	FALSE
Mpdz	0.0010002	0.00100139	0.00150237	FALSE	FALSE	FALSE
Tmx3	0.00100006	0.00100585	0.00100116	FALSE	FALSE	FALSE
Ube2z	0.00100011	0.00100465	0.00189623	FALSE	FALSE	FALSE
Epas1	0.00100008	0.00100196	0.00122044	FALSE	FALSE	FALSE
Myo6	0.00100016	0.001	0.01959	FALSE	FALSE	FALSE
Trim8	0.00100002	0.00100451	0.00169451	FALSE	FALSE	FALSE
Mpp6	0.00100002	0.00100354	0.00153173	FALSE	FALSE	FALSE
Tssc4	0.0010002	0.00100492	0.00172791	FALSE	FALSE	FALSE
Parvb	0.00100007	0.00100223	0.00100137	FALSE	FALSE	FALSE
Edc3	0.00100051	0.00353177	0.0155096	FALSE	FALSE	FALSE
Snip1	0.00100002	0.00100111	0.0227152	FALSE	FALSE	FALSE
Car10	0.00100015	0.00100557	0.00173857	FALSE	FALSE	FALSE
Mfap4	0.00100048	0.00103313	0.00147681	FALSE	FALSE	FALSE
Nisch	0.001	0.00100303	0.00112821	FALSE	FALSE	FALSE
Fzd9	0.00100079	0.0010151	0.0073046	FALSE	FALSE	FALSE
Edc4	0.00100002	0.00100641	0.00776125	FALSE	FALSE	FALSE
Fadd	0.00100036	0.0010235	0.00679066	FALSE	FALSE	FALSE
Socs2	0.00100008	0.0010084	0.00390186	FALSE	FALSE	FALSE
Sumo1	0.00100004	0.0010075	0.00884871	FALSE	FALSE	FALSE
Gmfb	0.00100002	0.0010046	0.00734923	FALSE	FALSE	FALSE
Pdp1	0.00100017	0.00100335	0.00499383	FALSE	FALSE	FALSE
Dctn1	0.00100004	0.00100168	0.00111734	FALSE	FALSE	FALSE
Ppig	0.00100017	0.0010059	0.00258918	FALSE	FALSE	FALSE
Fahd1	0.00100028	0.0010093	0.00383225	FALSE	FALSE	FALSE
Thap7	0.00100023	0.00100588	0.00217725	FALSE	FALSE	FALSE
Cnpy2	0.00100025	0.00177112	0.0246985	FALSE	FALSE	FALSE
Rbm5	0.0010001	0.00100085	0.0237944	FALSE	FALSE	FALSE
Psmd1	0.00100005	0.00100231	0.0015444	FALSE	FALSE	FALSE
Mpnd	0.00100003	0.00100412	0.00315956	FALSE	FALSE	FALSE
Rab6a	0.00100001	0.00100457	0.00311499	FALSE	FALSE	FALSE
Mdfic	0.00100055	0.00460593	0.00511475	FALSE	FALSE	FALSE
Pias4	0.00100025	0.00100095	0.003862	FALSE	FALSE	FALSE
Ap3s2	0.00100004	0.00132979	0.00101766	FALSE	FALSE	FALSE
Runx3	0.00100052	0.0212872	0.00107784	FALSE	FALSE	FALSE
Ubxn6	0.00100006	0.00100518	0.00100686	FALSE	FALSE	FALSE
Dtx1	0.00100059	0.00100016	0.052898	FALSE	FALSE	FALSE
Akap1	0.00100014	0.00100625	0.00911736	FALSE	FALSE	FALSE
Zfp82	0.00100086	0.00669777	0.017607	FALSE	FALSE	FALSE
Eid1	0.00100008	0.00281351	0.00116658	FALSE	FALSE	FALSE
Tspo	0.00100063	0.00100189	0.00367186	FALSE	FALSE	FALSE
Kat5	0.00100019	0.00100397	0.00106901	FALSE	FALSE	FALSE
Kat7	0.00100001	0.00100086	0.00523476	FALSE	FALSE	FALSE
Agk	0.00100046	0.00164161	0.00101045	FALSE	FALSE	FALSE
Rc3h1	0.00100021	0.00100121	0.00298466	FALSE	FALSE	FALSE
Flot2	0.00100008	0.00100129	0.00118978	FALSE	FALSE	FALSE
Wdr43	0.00100001	0.00100643	0.00204022	FALSE	FALSE	FALSE
Id4	0.00100012	0.0010045	0.00132426	FALSE	FALSE	FALSE
Eln	0.00100092	0.00100794	0.00239734	FALSE	FALSE	FALSE
Ing4	0.00100006	0.00101165	0.0182301	FALSE	FALSE	FALSE
Aurkb	0.00100283	0.00103513	0.0431256	FALSE	FALSE	FALSE
Basp1	0.00100004	0.00100455	0.0125158	FALSE	FALSE	FALSE
Asb15	0.00100344	0.00106233	0.0308415	FALSE	FALSE	FALSE
Alg3	0.0010001	0.00442161	0.0207228	FALSE	FALSE	FALSE
Scly	0.00100002	0.00233025	0.00702917	FALSE	FALSE	FALSE
Taok2	0.00100004	0.00185826	0.00154378	FALSE	FALSE	FALSE
Riok1	0.00100038	0.00101655	0.00217332	FALSE	FALSE	FALSE
Brd2	0.001	0.0010024	0.00354394	FALSE	FALSE	FALSE
Ror1	0.00100194	0.00101623	0.00851927	FALSE	FALSE	FALSE
Dach2	0.00100241	0.00105136	0.0503773	FALSE	FALSE	FALSE
Nkap	0.00100031	0.0010008	0.00234588	FALSE	FALSE	FALSE
Dedd	0.00100001	0.00100571	0.00558186	FALSE	FALSE	FALSE
Jund	0.00100022	0.00100375	0.00314223	FALSE	FALSE	FALSE
Apobr	0.00100067	0.00102147	0.0906965	FALSE	FALSE	FALSE
Tpp2	0.00100004	0.0010054	0.00168392	FALSE	FALSE	FALSE
Smap2	0.00100002	0.0010011	0.00102105	FALSE	FALSE	FALSE
Cry1	0.00185036	0.0762787	0.0116749	FALSE	FALSE	FALSE
Asap2	0.00100038	0.00100134	0.00100013	FALSE	FALSE	FALSE
Ptx3	0.00100043	0.00101255	0.0120893	FALSE	FALSE	FALSE
Oat	0.00100005	0.00100159	0.00100061	FALSE	FALSE	FALSE
Xrn1	0.00100001	0.00100364	0.00793802	FALSE	FALSE	FALSE
Ap2s1	0.00100007	0.00100054	0.00293916	FALSE	FALSE	FALSE
Ooep	0.00100085	0.00100777	0.00113957	FALSE	FALSE	FALSE
Igf1	0.00100106	0.00131484	0.00168444	FALSE	FALSE	FALSE
Nol12	0.00100031	0.00100301	0.00250942	FALSE	FALSE	FALSE
Cenpe	0.00100125	0.00116586	0.0669997	FALSE	FALSE	FALSE
Tsc1	0.00100008	0.00100163	0.0052989	FALSE	FALSE	FALSE
Flna	0.00100007	0.00100704	0.0145376	FALSE	FALSE	FALSE
Rsrc1	0.00100035	0.00100721	0.00269897	FALSE	FALSE	FALSE
Tnnc2	0.00100364	0.00110334	0.0110739	FALSE	FALSE	FALSE
Mutyh	0.00100139	0.0107377	0.010077	FALSE	FALSE	FALSE
Lcor	0.0010001	0.00100812	0.00589812	FALSE	FALSE	FALSE
Gak	0.00100008	0.0020861	0.00137317	FALSE	FALSE	FALSE
Pkp3	0.00100149	0.0499086	0.0143492	FALSE	FALSE	FALSE
Prps2	0.00100038	0.00100185	0.00410289	FALSE	FALSE	FALSE
Phf5a	0.00100002	0.00100382	0.0033772	FALSE	FALSE	FALSE
Ccnh	0.00100001	0.00100169	0.00104788	FALSE	FALSE	FALSE
Asb3	0.00100019	0.00100801	0.00103643	FALSE	FALSE	FALSE
Mpp5	0.00100019	0.00100632	0.00601835	FALSE	FALSE	FALSE
Cdk6	0.00100037	0.00102512	0.020634	FALSE	FALSE	FALSE
Fzd5	0.00100063	0.00101192	0.0163915	FALSE	FALSE	FALSE
Mta3	0.00100019	0.00100447	0.00355276	FALSE	FALSE	FALSE
Frrs1	0.00100073	0.00102313	0.0246178	FALSE	FALSE	FALSE
Arl8b	0.00100003	0.0010002	0.0013092	FALSE	FALSE	FALSE
Eif2d	0.00100006	0.00100674	0.00114226	FALSE	FALSE	FALSE
Fras1	0.00100068	0.00100862	0.00104973	FALSE	FALSE	FALSE
Kif23	0.00100003	0.00100171	0.1522	FALSE	FALSE	FALSE
Hip1	0.00100008	0.00110928	0.00884776	FALSE	FALSE	FALSE
Taf6l	0.00100014	0.0010087	0.00171764	FALSE	FALSE	FALSE
Heyl	0.00100015	0.00101054	0.00250944	FALSE	FALSE	FALSE
Stx3	0.00100033	0.00100089	0.0727079	FALSE	FALSE	FALSE
Farp1	0.00100018	0.00100064	0.00104015	FALSE	FALSE	FALSE
Ddr1	0.00100001	0.00100269	0.0131275	FALSE	FALSE	FALSE
Taf6	0.00100003	0.00100555	0.00100272	FALSE	FALSE	FALSE
Sav1	0.00100022	0.00100475	0.00740476	FALSE	FALSE	FALSE
Sgsm2	0.00100004	0.00100019	0.00565794	FALSE	FALSE	FALSE
Wipf1	0.00100016	0.00176585	0.00319806	FALSE	FALSE	FALSE
Cwc15	0.00100012	0.00957609	0.0106392	FALSE	FALSE	FALSE
Cox15	0.00100015	0.00100517	0.00126432	FALSE	FALSE	FALSE
Foxe3	0.00100314	0.00108558	0.00118906	FALSE	FALSE	FALSE
Jmjd6	0.00100006	0.00100149	0.00126141	FALSE	FALSE	FALSE
Xrcc6	0.0010005	0.00101014	0.0034923	FALSE	FALSE	FALSE
Med15	0.00100027	0.0043247	0.00111825	FALSE	FALSE	FALSE
Exoc7	0.00100013	0.00285026	0.00816433	FALSE	FALSE	FALSE
Nr5a2	0.00100015	0.00102343	0.00853757	FALSE	FALSE	FALSE
Ctbp2	0.00100019	0.00100182	0.00456187	FALSE	FALSE	FALSE
Spop	0.00100011	0.0010031	0.00114319	FALSE	FALSE	FALSE
Tfdp1	0.00100015	0.00100491	0.00495928	FALSE	FALSE	FALSE
Nipa2	0.00100028	0.0010013	0.0349231	FALSE	FALSE	FALSE
Dnpep	0.00100005	0.00100182	0.00151572	FALSE	FALSE	FALSE
Luc7l	0.00100011	0.00100748	0.00540073	FALSE	FALSE	FALSE
Pin1	0.00100021	0.00100255	0.00154701	FALSE	FALSE	FALSE
Rab2b	0.00100019	0.00110359	0.00404307	FALSE	FALSE	FALSE
Wasl	0.00100017	0.00100119	0.002887	FALSE	FALSE	FALSE
Lpin1	0.00100001	0.00100516	0.00111809	FALSE	FALSE	FALSE
Wdr74	0.00100033	0.00100176	0.00811286	FALSE	FALSE	FALSE
Kif2a	0.001	0.00100101	0.00253143	FALSE	FALSE	FALSE
Slit3	0.00100065	0.00101624	0.00892206	FALSE	FALSE	FALSE
Plin2	0.00100004	0.00100294	0.00446001	FALSE	FALSE	FALSE
Tmx1	0.0010002	0.00217038	0.00330455	FALSE	FALSE	FALSE
Vps11	0.00100008	0.00100465	0.0105672	FALSE	FALSE	FALSE
Kctd6	0.00100015	0.00100534	0.0341717	FALSE	FALSE	FALSE
Ntf3	0.00100138	0.00105577	0.022317	FALSE	FALSE	FALSE
Ssr2	0.00100038	0.00619572	0.0275045	FALSE	FALSE	FALSE
Dll3	0.00100058	0.00103222	0.0591637	FALSE	FALSE	FALSE
Syn1	0.00100002	0.00100351	0.00113736	FALSE	FALSE	FALSE
Ncoa6	0.00100009	0.00100292	0.00996222	FALSE	FALSE	FALSE
Brd4	0.00100001	0.00100187	0.00116756	FALSE	FALSE	FALSE
Sept2	0.00100052	0.00136576	0.00561208	FALSE	FALSE	FALSE
Crtc2	0.001	0.00100388	0.0109487	FALSE	FALSE	FALSE
Tmod2	0.00100021	0.0214874	0.00124991	FALSE	FALSE	FALSE
Cspg4	0.00100053	0.0242118	0.00270265	FALSE	FALSE	FALSE
Eny2	0.00100002	0.00155196	0.0082735	FALSE	FALSE	FALSE
Ccdc6	0.00100013	0.00390431	0.00152083	FALSE	FALSE	FALSE
Tle3	0.00100001	0.00100309	0.0101168	FALSE	FALSE	FALSE
Vps51	0.00100025	0.00100112	0.0010379	FALSE	FALSE	FALSE
Socs4	0.0010003	0.00100488	0.00112587	FALSE	FALSE	FALSE
Med8	0.00100014	0.0010005	0.00213496	FALSE	FALSE	FALSE
Nampt	0.00365787	0.00113927	0.00257391	FALSE	FALSE	FALSE
Irf8	0.0049924	0.00102013	0.0470885	FALSE	FALSE	FALSE
Ncoa3	0.00100017	0.00100927	0.0152403	FALSE	FALSE	FALSE
Peg10	0.00100038	0.00101068	0.0281511	FALSE	FALSE	FALSE
Rnpc3	0.00100029	0.00100529	0.0127109	FALSE	FALSE	FALSE
U2af2	0.00100005	0.00203037	0.00108136	FALSE	FALSE	FALSE
Vps25	0.00100013	0.00100626	0.0189957	FALSE	FALSE	FALSE
Tmod3	0.00100032	0.00100454	0.00100772	FALSE	FALSE	FALSE
Cebpd	0.00100066	0.00101194	0.0247649	FALSE	FALSE	FALSE
Plk1	0.00100102	0.0010414	0.0519181	FALSE	FALSE	FALSE
Casq1	0.00100179	0.00103317	0.028186	FALSE	FALSE	FALSE
Krit1	0.00100011	0.00100118	0.0164469	FALSE	FALSE	FALSE
Kif1a	0.00100019	0.00958962	0.00990302	FALSE	FALSE	FALSE
Rcn1	0.0010002	0.001005	0.0151344	FALSE	FALSE	FALSE
Mag	0.00100084	0.00101072	0.0405862	FALSE	FALSE	FALSE
Rhog	0.00100029	0.00101002	0.00747048	FALSE	FALSE	FALSE
Itih4	0.00100587	0.00104551	0.00118359	FALSE	FALSE	FALSE
Sash1	0.00654846	0.021744	0.00625014	FALSE	FALSE	FALSE
Trex1	0.00100068	0.00100931	0.00181114	FALSE	FALSE	FALSE
Pgam5	0.00100012	0.00100645	0.00431981	FALSE	FALSE	FALSE
Cnst	0.00100011	0.00299719	0.0217385	FALSE	FALSE	FALSE
Pecr	0.001	0.00101252	0.00254481	FALSE	FALSE	FALSE
Baz1a	0.00100043	0.00338453	0.0111808	FALSE	FALSE	FALSE
Gas2	0.00100007	0.00101137	0.00101748	FALSE	FALSE	FALSE
Znrf1	0.00100015	0.001422	0.00591169	FALSE	FALSE	FALSE
Cbx1	0.00100011	0.00147827	0.00130396	FALSE	FALSE	FALSE
Plek	0.00100047	0.00100313	0.0272039	FALSE	FALSE	FALSE
Tlr3	0.00100008	0.0018597	0.00386387	FALSE	FALSE	FALSE
C5ar2	0.00100034	0.00102995	0.00450673	FALSE	FALSE	FALSE
Ercc1	0.00100026	0.00100329	0.00250596	FALSE	FALSE	FALSE
Sept3	0.00100011	0.00100193	0.00266475	FALSE	FALSE	FALSE
Purb	0.00100008	0.00181798	0.0013304	FALSE	FALSE	FALSE
Ly86	0.00100007	0.0010093	0.0411239	FALSE	FALSE	FALSE
Btk	0.00100143	0.00740259	0.00222913	FALSE	FALSE	FALSE
Pde6d	0.00100035	0.00100636	0.0112566	FALSE	FALSE	FALSE
Smad5	0.00100002	0.00100093	0.00102409	FALSE	FALSE	FALSE
Myh4	0.00100288	0.00102994	0.0029069	FALSE	FALSE	FALSE
Psd3	0.00100003	0.00115804	0.00202636	FALSE	FALSE	FALSE
Zbp1	0.559896	0.0104652	0.00248431	TRUE	FALSE	FALSE
Bnc2	0.00100006	0.00136934	0.00152527	FALSE	FALSE	FALSE
Epha7	0.00100065	0.00100341	0.00500378	FALSE	FALSE	FALSE
Grsf1	0.00100009	0.00100223	0.00819625	FALSE	FALSE	FALSE
Rab30	0.00100013	0.00100104	0.00227209	FALSE	FALSE	FALSE
Naa40	0.00100019	0.00101306	0.00911727	FALSE	FALSE	FALSE
Tgm3	0.00100068	0.00107363	0.00104256	FALSE	FALSE	FALSE
Bin2	0.0652877	0.0893837	0.249724	FALSE	FALSE	FALSE
Agap1	0.00100008	0.00100517	0.0010262	FALSE	FALSE	FALSE
Tbrg1	0.00100032	0.00100274	0.00110009	FALSE	FALSE	FALSE
Hrg	0.00100159	0.00109958	0.0255764	FALSE	FALSE	FALSE
Ajuba	0.00100072	0.00101233	0.0036183	FALSE	FALSE	FALSE
Pak4	0.00100003	0.00100439	0.00821017	FALSE	FALSE	FALSE
Mkrn2	0.00100009	0.00100172	0.0027172	FALSE	FALSE	FALSE
Ppm1f	0.0010001	0.00100401	0.00202408	FALSE	FALSE	FALSE
Spi1	0.00100055	0.00100675	0.00112244	FALSE	FALSE	FALSE
Ssr1	0.00100011	0.0010016	0.00139287	FALSE	FALSE	FALSE
Nbr1	0.00100004	0.00100334	0.00152478	FALSE	FALSE	FALSE
Mynn	0.00100008	0.00101316	0.00166511	FALSE	FALSE	FALSE
Hbs1l	0.00100001	0.0010023	0.00379244	FALSE	FALSE	FALSE
Poc5	0.00100001	0.00100237	0.00217375	FALSE	FALSE	FALSE
Calca	0.00100026	0.12847	0.00831166	FALSE	TRUE	FALSE
Lypd1	0.00100019	0.00101842	0.0883387	FALSE	FALSE	FALSE
Uba1	0.00100015	0.0010022	0.00172175	FALSE	FALSE	FALSE
Ubn2	0.001	0.00100354	0.0126796	FALSE	FALSE	FALSE
Aldoc	0.00100021	0.00100238	0.00121352	FALSE	FALSE	FALSE
Tyw1	0.00100002	0.00101149	0.00112875	FALSE	FALSE	FALSE
G3bp1	0.00100002	0.00100058	0.00929551	FALSE	FALSE	FALSE
Carm1	0.00100009	0.00534153	0.00175871	FALSE	FALSE	FALSE
Lck	0.00100025	0.00101117	0.00138407	FALSE	FALSE	FALSE
Dhcr7	0.0010004	0.00100239	0.0238516	FALSE	FALSE	FALSE
Rrp12	0.00100026	0.00646908	0.00104036	FALSE	FALSE	FALSE
Esco1	0.00100021	0.00101021	0.0132788	FALSE	FALSE	FALSE
Zfr	0.00100009	0.00220571	0.00111608	FALSE	FALSE	FALSE
Oaz2	0.00100005	0.00100007	0.00100296	FALSE	FALSE	FALSE
Hdac6	0.00100016	0.00100037	0.00832911	FALSE	FALSE	FALSE
Bub3	0.00100011	0.00100326	0.00118419	FALSE	FALSE	FALSE
Adpgk	0.00100037	0.0019155	0.00339954	FALSE	FALSE	FALSE
Fgfr4	0.00100044	0.00105583	0.00153871	FALSE	FALSE	FALSE
Ush1g	0.00100072	0.00101257	0.00371517	FALSE	FALSE	FALSE
Braf	0.00100004	0.00100571	0.00738463	FALSE	FALSE	FALSE
Dip2b	0.00100005	0.00100155	0.00124358	FALSE	FALSE	FALSE
Oaz1	0.00100009	0.00100203	0.00612165	FALSE	FALSE	FALSE
Ly6h	0.00100007	0.00100921	0.00120926	FALSE	FALSE	FALSE
Copg2	0.00100007	0.00111545	0.00562466	FALSE	FALSE	FALSE
Snn	0.00100002	0.00100354	0.00837407	FALSE	FALSE	FALSE
Rgs7	0.00100024	0.00150603	0.00140652	FALSE	FALSE	FALSE
Sarnp	0.00100014	0.00100434	0.00184745	FALSE	FALSE	FALSE
Ipo5	0.00100017	0.00100479	0.00103119	FALSE	FALSE	FALSE
Coprs	0.00100006	0.00100503	0.00789913	FALSE	FALSE	FALSE
Cbx5	0.00100006	0.00100426	0.00102415	FALSE	FALSE	FALSE
Tiam1	0.00100051	0.0010127	0.0065689	FALSE	FALSE	FALSE
Vps35	0.00100012	0.00100425	0.00211946	FALSE	FALSE	FALSE
Dok7	0.00100008	0.00260124	0.0131981	FALSE	FALSE	FALSE
Mak16	0.00100024	0.00101157	0.00258247	FALSE	FALSE	FALSE
Ppm1e	0.00100021	0.00100649	0.00774204	FALSE	FALSE	FALSE
Ciart	0.00100144	0.0175029	0.0664523	FALSE	FALSE	FALSE
Dido1	0.0010003	0.00100534	0.00205491	FALSE	FALSE	FALSE
Coq4	0.00100025	0.00100903	0.0397085	FALSE	FALSE	FALSE
Vapb	0.00100007	0.00108899	0.00355088	FALSE	FALSE	FALSE
Tekt5	0.00100122	0.00576946	0.125648	FALSE	FALSE	FALSE
Med25	0.0010001	0.00100241	0.00107706	FALSE	FALSE	FALSE
Phrf1	0.0010001	0.00100111	0.00128434	FALSE	FALSE	FALSE
Loxl3	0.00100024	0.00100159	0.00134024	FALSE	FALSE	FALSE
Bmp5	0.00100095	0.00393471	0.00253493	FALSE	FALSE	FALSE
Aebp2	0.00100012	0.00100141	0.0111475	FALSE	FALSE	FALSE
Ehf	0.00100036	0.00102051	0.0406933	FALSE	FALSE	FALSE
Grtp1	0.00100035	0.00101167	0.0296156	FALSE	FALSE	FALSE
Mta2	0.00100004	0.00100164	0.00130172	FALSE	FALSE	FALSE
Myl6	0.00100005	0.00100194	0.00434904	FALSE	FALSE	FALSE
Dzip3	0.00100005	0.00100317	0.00166712	FALSE	FALSE	FALSE
Clpx	0.00100008	0.00100469	0.00231649	FALSE	FALSE	FALSE
Diap1	0.00100008	0.00100513	0.00908994	FALSE	FALSE	FALSE
Kdm3b	0.00100012	0.00100774	0.00138478	FALSE	FALSE	FALSE
Ldb2	0.00100002	0.00100691	0.00633407	FALSE	FALSE	FALSE
Bag6	0.00100011	0.00100295	0.00637534	FALSE	FALSE	FALSE
Kank3	0.00100036	0.0231948	0.0656237	FALSE	FALSE	FALSE
Lca5	0.00706172	0.021199	0.186117	FALSE	FALSE	FALSE
Zfp1	0.00100039	0.00100237	0.0102551	FALSE	FALSE	FALSE
Rgl3	0.0010004	0.00102582	0.0012687	FALSE	FALSE	FALSE
Mtmr1	0.00100031	0.00100579	0.023274	FALSE	FALSE	FALSE
Dok2	0.00100157	0.00104135	0.00279654	FALSE	FALSE	FALSE
Txnip	0.00100034	0.00100246	0.0160048	FALSE	FALSE	FALSE
Brd9	0.00100026	0.00100415	0.0261714	FALSE	FALSE	FALSE
Hmgn1	0.00100026	0.00100544	0.0010051	FALSE	FALSE	FALSE
Naa10	0.00100027	0.00100362	0.0114257	FALSE	FALSE	FALSE
Ric1	0.00100003	0.00100203	0.00253409	FALSE	FALSE	FALSE
Lair1	0.00100078	0.00100089	0.0262036	FALSE	FALSE	FALSE
Atp5h	0.00100004	0.00122553	0.00264616	FALSE	FALSE	FALSE
Pygb	0.00100006	0.00100492	0.00739616	FALSE	FALSE	FALSE
Ptov1	0.00100001	0.00100603	0.00462605	FALSE	FALSE	FALSE
Kcnq3	0.00100015	0.00100795	0.00417136	FALSE	FALSE	FALSE
Syt3	0.00100013	0.00211368	0.00102774	FALSE	FALSE	FALSE
Ncoa1	0.00100014	0.00578927	0.00783006	FALSE	FALSE	FALSE
Cpne2	0.00100011	0.00100529	0.00104879	FALSE	FALSE	FALSE
Sap18	0.00100004	0.00100273	0.00954315	FALSE	FALSE	FALSE
Bmp7	0.0010007	0.00101286	0.00106085	FALSE	FALSE	FALSE
Reps2	0.00100007	0.00100523	0.001062	FALSE	FALSE	FALSE
Grik3	0.00100022	0.00100826	0.00119541	FALSE	FALSE	FALSE
Psmd6	0.00100003	0.00100135	0.00138518	FALSE	FALSE	FALSE
Ncdn	0.00100007	0.00162284	0.00123773	FALSE	FALSE	FALSE
Egln2	0.00100005	0.00100608	0.00233078	FALSE	FALSE	FALSE
Nfib	0.00100033	0.00100285	0.00277979	FALSE	FALSE	FALSE
Six2	0.0010014	0.00105034	0.0337817	FALSE	FALSE	FALSE
Dnd1	0.0010003	0.00104741	0.00295632	FALSE	FALSE	FALSE
Sytl4	0.001001	0.00102642	0.078085	FALSE	FALSE	FALSE
Rab3b	0.0010002	0.00359014	0.00184518	FALSE	FALSE	FALSE
Taf1b	0.00100019	0.00101251	0.00103549	FALSE	FALSE	FALSE
Psd4	0.00100015	0.00100879	0.00244021	FALSE	FALSE	FALSE
Hhip	0.00100035	0.00102118	0.00111676	FALSE	FALSE	FALSE
Gga2	0.0010002	0.00100049	0.00102145	FALSE	FALSE	FALSE
Nhsl2	0.00100016	0.00210128	0.00887223	FALSE	FALSE	FALSE
Fgfr2	0.00100073	0.00101938	0.0143495	FALSE	FALSE	FALSE
Meis2	0.00100031	0.00134557	0.00137459	FALSE	FALSE	FALSE
Tdrkh	0.00100001	0.0010005	0.00667437	FALSE	FALSE	FALSE
Flnb	0.00100058	0.00101444	0.00150654	FALSE	FALSE	FALSE
Wasf2	0.00100012	0.00100771	0.00120665	FALSE	FALSE	FALSE
Ubn1	0.00100027	0.00100266	0.00100721	FALSE	FALSE	FALSE
Get4	0.00100016	0.0010035	0.00101338	FALSE	FALSE	FALSE
Tfb2m	0.00100011	0.00100591	0.00107133	FALSE	FALSE	FALSE
Nxt2	0.00100017	0.00100101	0.0010816	FALSE	FALSE	FALSE
Acsl6	0.00100007	0.00100374	0.00195165	FALSE	FALSE	FALSE
Cd52	0.0175779	0.00102161	0.196865	FALSE	FALSE	FALSE
Vhl	0.00100048	0.00176541	0.00620241	FALSE	FALSE	FALSE
Mis12	0.00100004	0.0010092	0.00102074	FALSE	FALSE	FALSE
Hmgb1	0.00100019	0.00100101	0.00795094	FALSE	FALSE	FALSE
Sar1b	0.00100028	0.00100505	0.0218368	FALSE	FALSE	FALSE
Ccr9	0.00100277	0.0010295	0.0133463	FALSE	FALSE	FALSE
Eif3d	0.00100015	0.00100177	0.00112211	FALSE	FALSE	FALSE
Csdc2	0.00100012	0.00100057	0.00165401	FALSE	FALSE	FALSE
G0s2	0.00100038	0.00101325	0.00387518	FALSE	FALSE	FALSE
Plp2	0.00100064	0.0019365	0.0032467	FALSE	FALSE	FALSE
Birc3	0.0010004	0.00101177	0.00579706	FALSE	FALSE	FALSE
Rwdd1	0.00100019	0.00100632	0.00220552	FALSE	FALSE	FALSE
Rab5c	0.00134441	0.00100056	0.00441098	FALSE	FALSE	FALSE
Sik2	0.00100067	0.00358895	0.00106319	FALSE	FALSE	FALSE
Pparg	0.0010005	0.00100208	0.00607498	FALSE	FALSE	FALSE
Rbak	0.00100021	0.00101156	0.0111723	FALSE	FALSE	FALSE
Ufsp1	0.00100002	0.00127388	0.00360175	FALSE	FALSE	FALSE
Xdh	0.00100255	0.010479	0.0361486	FALSE	FALSE	FALSE
Ntrk3	0.00100017	0.00100005	0.0396592	FALSE	FALSE	FALSE
Prrc1	0.00100026	0.0010051	0.00258199	FALSE	FALSE	FALSE
Papd5	0.00100015	0.00100074	0.00226483	FALSE	FALSE	FALSE
Dlx5	0.00100115	0.00100963	0.0116115	FALSE	FALSE	FALSE
Msln	0.00100029	0.00101877	0.0923762	FALSE	FALSE	FALSE
Slit2	0.00298128	0.00100671	0.00106102	FALSE	FALSE	FALSE
Rbfa	0.00100002	0.00100029	0.0039185	FALSE	FALSE	FALSE
Rad21	0.00100009	0.00100352	0.00200915	FALSE	FALSE	FALSE
Caps2	0.00100253	0.00100599	0.0613891	FALSE	FALSE	FALSE
Kif9	0.00100034	0.00100293	0.00135396	FALSE	FALSE	FALSE
Mecom	0.00100024	0.00101096	0.00102525	FALSE	FALSE	FALSE
Bend6	0.00100016	0.0042873	0.00125545	FALSE	FALSE	FALSE
Ehd2	0.00100016	0.00100371	0.00890668	FALSE	FALSE	FALSE
Gnal	0.00100026	0.0010044	0.00100436	FALSE	FALSE	FALSE
Lrp6	0.00261146	0.00100247	0.00106307	FALSE	FALSE	FALSE
Git2	0.00100009	0.0020405	0.0102823	FALSE	FALSE	FALSE
Kdm2b	0.00100016	0.0010009	0.0057923	FALSE	FALSE	FALSE
Lasp1	0.00100001	0.00253422	0.00676659	FALSE	FALSE	FALSE
Oxr1	0.00100011	0.00278489	0.00379287	FALSE	FALSE	FALSE
Spef2	0.00100102	0.00106002	0.0220927	FALSE	FALSE	FALSE
Wasf1	0.00100006	0.00100151	0.00653517	FALSE	FALSE	FALSE
Abi1	0.00100003	0.00100039	0.00141323	FALSE	FALSE	FALSE
Asic1	0.00100002	0.00100417	0.00328499	FALSE	FALSE	FALSE
Id1	0.00100008	0.0116565	0.0399192	FALSE	FALSE	FALSE
Rbbp5	0.00100006	0.00100752	0.00115265	FALSE	FALSE	FALSE
Nfkb1	0.00100032	0.00100022	0.00100032	FALSE	FALSE	FALSE
Spcs3	0.00100006	0.0010043	0.00629771	FALSE	FALSE	FALSE
Akt3	0.001	0.00100473	0.00508096	FALSE	FALSE	FALSE
Smap1	0.00100004	0.00100302	0.0039769	FALSE	FALSE	FALSE
Arl8a	0.00100007	0.00100127	0.0037878	FALSE	FALSE	FALSE
Parp1	0.00100011	0.00100567	0.00173063	FALSE	FALSE	FALSE
Hpdl	0.00100176	0.00280503	0.279892	FALSE	FALSE	FALSE
Top2b	0.00100023	0.00175209	0.00102501	FALSE	FALSE	FALSE
Parva	0.00100006	0.00100569	0.00137569	FALSE	FALSE	FALSE
Riok3	0.00100033	0.00195535	0.00669223	FALSE	FALSE	FALSE
Bnc1	0.00100133	0.00632588	0.00558196	FALSE	FALSE	FALSE
L1cam	0.00100016	0.00238367	0.0350291	FALSE	FALSE	FALSE
[truncated: 1,995 more rows]

## Sheet: g. Mm. intra-layer edge table
source	target	score	edge type
Ccnd1	Cdk4	0.764743	PPI
Cdk2	Ccne1	0.758555	PPI
Shc1	Grb2	0.758255	PPI
Ezh2	Eed	0.757843	PPI
Ripk1	Fadd	0.7573	PPI
Per2	Cry1	0.755746	PPI
Cbl	Crk	0.752121	PPI
Ezh2	Suz12	0.751658	PPI
Casp8	Fadd	0.751479	PPI
Hdac1	Sin3a	0.751079	PPI
Egfr	Grb2	0.749232	PPI
Nanog	Sall4	0.748951	PPI
Clock	Cry1	0.748839	PPI
Smad4	Smad3	0.745913	PPI
Per2	Cry2	0.744327	PPI
Clock	Per2	0.743806	PPI
Mdm4	Mdm2	0.742288	PPI
Cbl	Grb2	0.742078	PPI
Axin1	Gsk3b	0.741435	PPI
Cbl	Egfr	0.741095	PPI
Ccna2	Cdk2	0.739089	PPI
Src	Cbl	0.73671	PPI
Cbl	Crkl	0.736478	PPI
Stx1a	Vamp2	0.734778	PPI
Ilk	Parva	0.731992	PPI
Suz12	Eed	0.730079	PPI
Dnmt1	Uhrf1	0.729088	PPI
Myd88	Irak1	0.724569	PPI
Becn1	Bcl2	0.722936	PPI
Cbl	Fyn	0.722172	PPI
Rbbp5	Ash2l	0.722172	PPI
Fadd	Ripk3	0.721116	PPI
Smad4	Smad2	0.721116	PPI
Grb2	Gab1	0.720117	PPI
Myd88	Tlr4	0.719879	PPI
Per1	Cry1	0.718382	PPI
Dlg4	Arc	0.718256	PPI
Wdr5	Rbbp5	0.716546	PPI
Cdk1	Ccnb1	0.715792	PPI
Vhl	Hif1a	0.714449	PPI
Brca2	Rad51	0.71155	PPI
Ilk	Lims1	0.710762	PPI
Fbxl3	Cry2	0.710762	PPI
Nacc1	Nanog	0.708623	PPI
Myd88	Irak4	0.708182	PPI
Tead1	Yap1	0.704381	PPI
Hdac2	Sin3a	0.704312	PPI
Hdac1	Mta2	0.704312	PPI
Hdac2	Mta2	0.704312	PPI
Rtkn	Rhoa	0.701799	PPI
Ahr	Arnt	0.700511	PPI
Pcgf2	Phc2	0.69749	PPI
Dlg4	Neto1	0.697042	PPI
Cry1	Fbxl3	0.696142	PPI
Eya1	Six1	0.695888	PPI
Eya1	Six2	0.695616	PPI
Gria1	Gria2	0.69528	PPI
Tank	Tbk1	0.691893	PPI
Myd88	Traf6	0.691824	PPI
Kalrn	Dlg4	0.690595	PPI
Psmd4	Ubc	0.688045	PPI
Dffa	Dffb	0.688045	PPI
Bcl2	Bax	0.687884	PPI
Fos	Jun	0.68719	PPI
Grb2	Sos1	0.687002	PPI
Traf6	Itch	0.686172	PPI
Nanog	Mta2	0.686172	PPI
Dlg4	Lrp1	0.685643	PPI
Hdac1	Hdac2	0.68559	PPI
Vps35	Vps29	0.684403	PPI
Ly96	Tlr4	0.68411	PPI
Arnt	Hif1a	0.684039	PPI
Hdac1	Kdm1a	0.683008	PPI
Rptor	Mtor	0.682551	PPI
Gria2	Dlg4	0.682551	PPI
Kcna4	Dlg4	0.680676	PPI
Cdk4	Cebpa	0.680398	PPI
Stat3	Jak2	0.680059	PPI
Hck	Cbl	0.678425	PPI
Dlg4	Lgi1	0.678155	PPI
Kcna1	Dlg4	0.678155	PPI
Kcna2	Dlg4	0.678155	PPI
Ring1	Rybp	0.676658	PPI
Cdc27	Fzr1	0.676308	PPI
Braf	Raf1	0.676308	PPI
Cul1	Skp2	0.676308	PPI
Ilk	Parvb	0.676308	PPI
Cbl	Lyn	0.676308	PPI
Hdac1	Sin3b	0.676308	PPI
Crkl	Dab1	0.676206	PPI
Abl1	Dok1	0.676135	PPI
Lamc1	Nid1	0.67518	PPI
Bmi1	Phc2	0.674211	PPI
Traf6	Irak1	0.673574	PPI
Hdac1	Tal1	0.67353	PPI
Dmd	Snta1	0.671871	PPI
Stam2	Hgs	0.671629	PPI
Cbl	Sh2b2	0.670789	PPI
Myd88	Traf3	0.670449	PPI
Lck	Cd4	0.670427	PPI
Hdac1	Sox2	0.66677	PPI
Sox2	Nanog	0.666729	PPI
Agap2	Dlg4	0.666644	PPI
Nanog	Zmym2	0.666644	PPI
Dlg4	Dlg2	0.666644	PPI
Dlg3	Dlg4	0.666644	PPI
Dlg4	Dlg1	0.666644	PPI
Ncoa2	Carm1	0.66659	PPI
Atg5	Atg12	0.66485	PPI
Wnt3a	Fzd8	0.664783	PPI
Abl1	Cbl	0.664092	PPI
Atg3	Atg12	0.662142	PPI
Ercc1	Slx4	0.661308	PPI
Axin1	Lrp5	0.661308	PPI
Syne2	Sun2	0.661308	PPI
Dvl1	Dact1	0.660495	PPI
Dmd	Sntb2	0.660373	PPI
Ube2n	Traf6	0.660373	PPI
Dmd	Sntb1	0.660373	PPI
Chd4	Mta2	0.66025	PPI
Traf6	Ecsit	0.658102	PPI
Rev1	Polh	0.6576	PPI
Ctbp1	Zeb1	0.657577	PPI
Rac1	Dlg4	0.655704	PPI
Mtf2	Ezh2	0.655704	PPI
Hdac2	Nanog	0.655704	PPI
Mtf2	Suz12	0.655704	PPI
Mta1	Mta2	0.655704	PPI
Mta2	Mbd3	0.655704	PPI
Rbbp4	Ezh2	0.655704	PPI
Ezh1	Suz12	0.655704	PPI
Ezh2	Aebp2	0.655704	PPI
Akt1	Gsk3b	0.654802	PPI
Akt1	Gsk3a	0.654802	PPI
Nedd4	Grb10	0.652838	PPI
Ubc	Hgs	0.650947	PPI
Plin1	Abhd5	0.650947	PPI
Smc1a	Smc3	0.650823	PPI
Hdac2	Kdm1a	0.650698	PPI
Arf3	Dlg4	0.65008	PPI
Mks1	B9d1	0.65008	PPI
Cbl	Itsn1	0.65008	PPI
Kcna3	Dlg4	0.65008	PPI
Grik5	Dlg4	0.65008	PPI
Grik2	Dlg4	0.65008	PPI
Prdx1	Dlg4	0.65008	PPI
Abr	Dlg4	0.65008	PPI
Dlg4	Nlgn2	0.65008	PPI
Dlg4	Sept5	0.65008	PPI
Gnai1	Dlg4	0.65008	PPI
Cntn1	Dlg4	0.65008	PPI
Dlg4	Grm3	0.65008	PPI
Dlg4	Gria3	0.65008	PPI
Syt1	Dlg4	0.65008	PPI
Dlg4	Basp1	0.65008	PPI
Dlg4	Gria4	0.65008	PPI
Phb2	Dlg4	0.65008	PPI
Ep300	Kat2b	0.646559	PPI
Stam2	Ubc	0.646392	PPI
Socs3	Cul5	0.646392	PPI
Atg3	Atg7	0.646238	PPI
Malt1	Bcl10	0.646238	PPI
Traf3	Tcam1	0.646238	PPI
Hdac1	Cebpb	0.646085	PPI
Eps8	Abi1	0.646085	PPI
Kdm1a	Rcor1	0.646085	PPI
Tec	Dok1	0.645686	PPI
Nr2c1	Nrip1	0.64396	PPI
Trrap	Kat2a	0.643209	PPI
Lrrk2	Dnm1l	0.642967	PPI
Gria2	Grip1	0.642967	PPI
Dab1	Vldlr	0.641818	PPI
Nfkb1	Relb	0.641818	PPI
Bcl6b	Bcl6	0.641322	PPI
Lck	Cbl	0.640376	PPI
Nanog	Mbd3	0.640376	PPI
Tcam1	Tlr4	0.640376	PPI
Fbxw7	Cul1	0.640376	PPI
Gli1	Sufu	0.640376	PPI
Gli3	Sufu	0.640376	PPI
Traf6	Cyld	0.640376	PPI
Myd88	Irak2	0.640376	PPI
Clock	Per1	0.640376	PPI
Myb	Fbxw7	0.640376	PPI
Epor	Jak2	0.640376	PPI
Il1r1	Myd88	0.640376	PPI
Mdm2	Dlg4	0.640376	PPI
Shc1	Sos1	0.640376	PPI
Ripk1	Ripk3	0.640376	PPI
Shc1	Egfr	0.640376	PPI
Atrx	Mecp2	0.639077	PPI
Rif1	Nanog	0.638345	PPI
Clock	Cry2	0.635915	PPI
Pak1	Cdc42	0.635915	PPI
Csf1	Csf1r	0.635542	PPI
Cd22	Grb2	0.634408	PPI
Lmna	Sun2	0.633154	PPI
Cul4a	Ddb1	0.633154	PPI
Gata1	Tal1	0.633154	PPI
Ccnd3	Cdk6	0.633154	PPI
Ccnd1	Cdk6	0.633154	PPI
Tal1	Ldb1	0.633154	PPI
Ric8b	Gnal	0.632979	PPI
Per1	Cry2	0.63059	PPI
Ap2a2	Eps15	0.629338	PPI
Ubc	Mysm1	0.629338	PPI
Ccnd3	Fbxl2	0.629338	PPI
Igf1r	Grb10	0.628641	PPI
Traf6	Irak3	0.628641	PPI
Cbl	Cd2ap	0.628641	PPI
Per1	Per2	0.628641	PPI
Dok1	Nck1	0.628436	PPI
Eed	Aebp2	0.628436	PPI
Tnik	Agap2	0.628436	PPI
Myc	Max	0.62498	PPI
Ubc	Vps36	0.624625	PPI
Ubc	Uchl1	0.624625	PPI
Cebpa	Cdk2	0.624466	PPI
Hdac1	Sp1	0.624466	PPI
Sox2	Six1	0.624466	PPI
Hnf1b	Kat2b	0.624466	PPI
Sox2	Sall4	0.624466	PPI
Ly86	Cd180	0.624466	PPI
Sox2	Eya1	0.624466	PPI
Lck	Hcls1	0.624466	PPI
Cdk1	Ccna2	0.624466	PPI
Optn	Tbk1	0.624466	PPI
Nup62	Nxf1	0.624466	PPI
Gria2	Gria3	0.623774	PPI
Lat	Plcg1	0.623774	PPI
Lat	Grb2	0.623774	PPI
Ccnd3	Cdk4	0.623774	PPI
Grb2	Frs2	0.623774	PPI
Kif3a	Kif3b	0.623774	PPI
Ccnd2	Cdk4	0.623774	PPI
Fscn1	Dlg4	0.622404	PPI
Uba1	Dlg4	0.622404	PPI
Arpc4	Dlg4	0.622404	PPI
Prrt1	Dlg4	0.622404	PPI
Fadd	Atg5	0.621075	PPI
Nacc1	Sall4	0.621075	PPI
Myd88	Cblb	0.621075	PPI
Grap2	Blnk	0.61989	PPI
Lyn	Hcls1	0.61989	PPI
Nck2	Efnb1	0.61989	PPI
Daxx	Dmap1	0.619377	PPI
Pias3	Gfi1	0.619377	PPI
Net1	Unc5b	0.618791	PPI
Ptpra	Grb2	0.618592	PPI
Socs3	Jak2	0.618592	PPI
Srsf2	Cdk9	0.618393	PPI
Dtnb	Kif5a	0.618354	PPI
Rev1	Polk	0.614427	PPI
Poli	Rev1	0.614427	PPI
Ubc	Adrm1	0.614173	PPI
Ring1	Cbx2	0.614173	PPI
Foxk1	Sin3b	0.614002	PPI
Sfr1	Swi5	0.613972	PPI
Pcna	Rev1	0.613972	PPI
Sumo1	Nr2c1	0.61296	PPI
Traf6	Irf7	0.611166	PPI
Sp1	E2f1	0.611166	PPI
Nanog	Rfc4	0.610911	PPI
Myd88	Tnip1	0.610911	PPI
Traf2	Ube2n	0.610911	PPI
Traf2	Itch	0.610911	PPI
Sin3a	Mecp2	0.610911	PPI
Rock2	Dlg4	0.610911	PPI
Traf6	Rnf11	0.610911	PPI
Gpm6a	Dlg4	0.610911	PPI
Rybp	Pcgf1	0.610911	PPI
Csk	Dok1	0.610911	PPI
Traf3	Dlg4	0.610911	PPI
Akt1	Arrb2	0.610911	PPI
Nedd4	Tnik	0.610911	PPI
Wasf2	Abi1	0.610911	PPI
Ppib	Dlg4	0.610911	PPI
Nanog	Smc3	0.610911	PPI
Hcn2	Hcn1	0.610911	PPI
Gria1	Dlg4	0.610911	PPI
Msh6	Nanog	0.610911	PPI
Sin3a	Nanog	0.610911	PPI
Dlg4	Nlgn3	0.610911	PPI
Dlg4	Rab3b	0.610911	PPI
Myh9	Trpm7	0.610911	PPI
Gria2	Agap2	0.610911	PPI
Tet1	Nanog	0.610911	PPI
Rbbp7	Ezh2	0.610911	PPI
Chd4	Nanog	0.610911	PPI
Kdm1a	Nanog	0.610911	PPI
Ezh1	Eed	0.610911	PPI
Ezh1	Aebp2	0.610911	PPI
Ezh1	Rbbp4	0.610911	PPI
Dlg4	Mpp2	0.610911	PPI
Daxx	Mdm2	0.610911	PPI
Dlg4	Park7	0.610911	PPI
Cdk5	Dlg4	0.610911	PPI
Rab3c	Dlg4	0.610911	PPI
Traf6	Nr0b2	0.610911	PPI
Phc1	Nanog	0.610911	PPI
Ncam1	Dlg4	0.610911	PPI
Ezh1	Mtf2	0.610911	PPI
Ngly1	Amfr	0.609727	PPI
Dab1	Aplp1	0.608485	PPI
Insr	Grb10	0.608485	PPI
Cyld	Bcl3	0.608485	PPI
Socs1	Jak2	0.608455	PPI
Dmd	Dag1	0.608229	PPI
Ubc	Nbr1	0.6024	PPI
Ubc	Cblb	0.6024	PPI
Ubc	Psmd2	0.6024	PPI
Ubc	Ubxn1	0.6024	PPI
Ubc	Mycbp	0.6024	PPI
Ubc	Epn1	0.6024	PPI
Ubc	Rnf31	0.6024	PPI
Ubc	Psmd7	0.6024	PPI
Ubc	Psmd1	0.6024	PPI
Ubc	Huwe1	0.6024	PPI
Ubc	Tab2	0.6024	PPI
Ubc	Ube2k	0.6024	PPI
Tom1	Ubc	0.6024	PPI
Ubc	Brcc3	0.6024	PPI
Ubc	Hdac6	0.6024	PPI
Ubc	N4bp1	0.6024	PPI
Ubc	Eps15	0.6024	PPI
Ccl2	Ccr2	0.6024	PPI
Abl1	Nck1	0.602196	PPI
Nsf	Dlg4	0.601682	PPI
Jak2	Sh2b1	0.601518	PPI
Lims1	Parva	0.601184	PPI
Prdx2	Dlg4	0.601184	PPI
Stk38	Eed	0.601184	PPI
Cyld	Itch	0.601184	PPI
Traf3	Mavs	0.601184	PPI
Yap1	Wwtr1	0.601184	PPI
Sept2	Dlg4	0.601184	PPI
Ring1	Pcgf2	0.601184	PPI
Dnmt1	Ezh2	0.601184	PPI
Fxr1	Ago2	0.601184	PPI
Axin1	Dab2	0.601184	PPI
Cflar	Fadd	0.601184	PPI
Hdac1	Ezh2	0.601184	PPI
Hdac1	Nfkb1	0.601184	PPI
B9d2	B9d1	0.601184	PPI
Cebpb	Kat2a	0.597414	PPI
Mcm6	Cdt1	0.596429	PPI
Net1	Dscam	0.594565	PPI
Mag	Rtn4r	0.594565	PPI
Atf2	Jdp2	0.594565	PPI
Traf6	Arrb2	0.594565	PPI
Ubc	Uchl5	0.594565	PPI
Dmd	Nos1	0.594565	PPI
Fgfr1	Frs2	0.594565	PPI
Dab1	Crk	0.594565	PPI
Ubc	Usp9x	0.594565	PPI
Shh	Boc	0.594565	PPI
Ubc	Cyld	0.594565	PPI
Ubc	Otub1	0.594565	PPI
Ubc	Uchl3	0.594565	PPI
Mcm3	Mcm7	0.594565	PPI
Egfr	Jak2	0.594565	PPI
Sycp3	Sycp2	0.594565	PPI
Ube2b	Rad18	0.594565	PPI
Xiap	Htra2	0.594565	PPI
Pbx1	Meis1	0.594565	PPI
Traf6	Tcam1	0.594565	PPI
Socs2	Cul5	0.594565	PPI
Cdon	Shh	0.594565	PPI
Egf	Egfr	0.594565	PPI
Med12	Cdk8	0.594303	PPI
Invs	Nek8	0.594303	PPI
Cebpa	Wdr5	0.594303	PPI
Hdac1	Cebpa	0.594303	PPI
Chd4	Kdm1a	0.594303	PPI
Mlkl	Ripk3	0.594303	PPI
Ctbp1	Kdm1a	0.594303	PPI
Dbp	Tef	0.594242	PPI
Barx2	Creb1	0.594242	PPI
Ppara	Rxra	0.594242	PPI
Relb	Nfkb2	0.594035	PPI
Ggn	Fancl	0.5935	PPI
Fzd8	Gopc	0.591692	PPI
Rtn4	Rtn4r	0.590931	PPI
Dll1	Magi2	0.590749	PPI
Nphp4	Nphp1	0.590246	PPI
Dapk3	Atf4	0.589946	PPI
Nanog	Pin1	0.589106	PPI
Arnt	Epas1	0.589106	PPI
Prdx6	Ncf2	0.589106	PPI
Fos	Mafb	0.589106	PPI
Kat5	Dmap1	0.588092	PPI
Crkl	Cblb	0.588092	PPI
Ccnd2	Cdk6	0.588092	PPI
Sox2	Hdac2	0.588092	PPI
Ep400	Kat5	0.588092	PPI
Kat5	Brd8	0.588092	PPI
Ep400	Dmap1	0.588092	PPI
Ldlr	Dab1	0.586299	PPI
Nab2	Chd4	0.586299	PPI
Ptpra	Ptprd	0.586299	PPI
Barx2	Atf2	0.586299	PPI
Hdac1	E2f1	0.586299	PPI
Jun	Mafb	0.586299	PPI
Ddit3	Cebpa	0.586299	PPI
Brca1	Brca2	0.586299	PPI
Hdac1	Eed	0.586299	PPI
Ptprs	Ptpra	0.586299	PPI
Rara	Nrip1	0.586299	PPI
Tbp	Taf1a	0.586299	PPI
Ring1	Phc2	0.586299	PPI
Tbp	Taf1c	0.586299	PPI
Ssbp2	Ssbp3	0.586299	PPI
Ldb1	Ssbp3	0.586299	PPI
Tbp	Taf1b	0.586299	PPI
Grid2	Cbln1	0.586227	PPI
Anxa2	Hltf	0.586227	PPI
Kdm1a	Kdm4c	0.586227	PPI
Gfi1b	Kdm1a	0.586227	PPI
Nsf	Musk	0.585971	PPI
Bmi1	Cbx2	0.585971	PPI
Rasd1	Nr2f6	0.585971	PPI
Dok7	Musk	0.585147	PPI
Casp8	Atg5	0.584903	PPI
Rab10	Dlg4	0.584903	PPI
Mov10	Nanog	0.584903	PPI
Dlg4	Nbea	0.584903	PPI
Dip2b	Dlg4	0.584903	PPI
Brca2	Nanog	0.584903	PPI
Rap2b	Dlg4	0.584903	PPI
Dlg4	Cand1	0.584903	PPI
Spi1	Irf4	0.584643	PPI
Sntb1	Dtna	0.584643	PPI
Grb2	Lcp2	0.584643	PPI
Casp1	Nlrc4	0.584643	PPI
Apba1	Lin7c	0.5843	PPI
Ep300	Spi1	0.5843	PPI
Cdk1	Ccne1	0.5843	PPI
Stat3	Foxp3	0.5843	PPI
Rbx1	Cul7	0.5843	PPI
Insr	Sh2b2	0.5843	PPI
Cul3	Keap1	0.5843	PPI
Rbx1	Cul1	0.5843	PPI
Ezh2	Phf19	0.5843	PPI
Hap1	Ahi1	0.5843	PPI
Dll1	Mib1	0.5843	PPI
Cul4b	Ddb1	0.5843	PPI
Eps15	Egfr	0.5843	PPI
Nrp1	Gipc1	0.5843	PPI
Mib1	Dll4	0.5843	PPI
Fgr	Cbl	0.5843	PPI
Cdc27	Cdc20	0.5843	PPI
Myc	Fbxw7	0.5843	PPI
Vps45	Vps18	0.5843	PPI
Rab3a	Rims1	0.5843	PPI
Pml	Nanog	0.5843	PPI
Per2	Fbxl3	0.5843	PPI
Myd88	Tlr2	0.5843	PPI
Traf6	Tlr4	0.5843	PPI
Traf6	Tab2	0.5843	PPI
Erbb2	Egfr	0.5843	PPI
Sgcd	Sgcb	0.5843	PPI
Sgcg	Sgcb	0.5843	PPI
Il1r1	Irak1	0.5843	PPI
Nsf	Lrrk2	0.5843	PPI
Kif5c	Kif5a	0.5843	PPI
Btk	Blnk	0.5843	PPI
Ripk1	Itch	0.5843	PPI
Rab3a	Rims2	0.5843	PPI
Runx2	Wwtr1	0.5843	PPI
Dvl2	Dact1	0.5843	PPI
Akt1	Arrb1	0.5843	PPI
Rbbp5	Dpy30	0.5843	PPI
Gli1	Itch	0.5843	PPI
Epor	Cish	0.5843	PPI
Rock2	Raf1	0.5843	PPI
Nanog	Mta3	0.5843	PPI
Akt1	Traf6	0.5843	PPI
Traf2	Cd27	0.5843	PPI
Hdac1	Nanog	0.5843	PPI
Hdac1	Rcor1	0.5843	PPI
Per3	Cry2	0.5843	PPI
Ulk1	Mtor	0.5843	PPI
Wdr18	Nanog	0.5843	PPI
Src	Csf1r	0.5843	PPI
Il1r1	Irak4	0.5843	PPI
Lmna	Sun1	0.5843	PPI
Skil	Pml	0.5843	PPI
Vamp8	Stx17	0.5843	PPI
Irf5	Irak1	0.5843	PPI
Leo1	Paf1	0.5843	PPI
Tcam1	Tbk1	0.5843	PPI
Nanog	Pogz	0.5843	PPI
Cdk16	Ccny	0.5843	PPI
Gli2	Spop	0.5843	PPI
Bcl2	Rad9a	0.5843	PPI
Gli2	Sufu	0.5843	PPI
Nanog	Mta1	0.5843	PPI
Vps18	Stx6	0.5843	PPI
Brdt	Cdk9	0.5843	PPI
Tgfb1	Ltbp3	0.5843	PPI
Cbl	Nck1	0.5843	PPI
Rbbp4	Suz12	0.5843	PPI
Rbbp7	Suz12	0.5843	PPI
Kdm1a	Rcor2	0.5843	PPI
Suz12	Phf19	0.5843	PPI
Mef2a	Hdac4	0.5843	PPI
Ift20	Ift88	0.5843	PPI
Eed	Phf19	0.5843	PPI
Rbbp7	Mta2	0.5843	PPI
Suz12	Aebp2	0.5843	PPI
Eed	Ehmt2	0.5843	PPI
Kdm2b	Pcgf1	0.5843	PPI
Azin2	Oaz3	0.5843	PPI
Egfr	Sos1	0.5843	PPI
Lck	Zap70	0.5843	PPI
Tal1	Sin3a	0.5843	PPI
Smad5	Zeb2	0.58394	PPI
Myd88	Tirap	0.58394	PPI
Ctbp2	Zeb1	0.58394	PPI
Gopc	Fzd5	0.578386	PPI
Limk1	Rnf6	0.578386	PPI
Rac1	Traf6	0.578386	PPI
Dmd	Nde1	0.578386	PPI
Per2	Cdk5	0.578386	PPI
Arf5	Caps2	0.578386	PPI
Actn2	Ldb3	0.578386	PPI
Hmga1	Taf3	0.578386	PPI
Six3	Tle4	0.578386	PPI
Mecom	Mbd3	0.576271	PPI
Cryab	Stat3	0.575885	PPI
Bcl2	Bad	0.575885	PPI
Cobl	Dbnl	0.575885	PPI
Traf6	Bag6	0.575885	PPI
Birc3	Traf2	0.575885	PPI
Lepr	Cish	0.575885	PPI
Per3	Cry1	0.575885	PPI
Per2	Per3	0.575885	PPI
Shc1	Gab1	0.575885	PPI
Per1	Per3	0.575885	PPI
Fos	Atf4	0.575854	PPI
Jun	Atf4	0.575854	PPI
Clcn7	Ostm1	0.57559	PPI
Dlg4	Pgam5	0.57559	PPI
Dapk3	Stat3	0.575552	PPI
Sos2	Grb2	0.573868	PPI
Dvl1	Musk	0.573442	PPI
Magi1	Esam	0.573442	PPI
Ctbp1	Glis2	0.573442	PPI
Pias1	Nr2c1	0.573442	PPI
Fgd1	Dbnl	0.573442	PPI
Lck	Socs6	0.573442	PPI
Ryk	Cdc37	0.573442	PPI
Gata4	Smad3	0.573442	PPI
Eme1	Uhrf1	0.573442	PPI
Map1b	Nbr1	0.573442	PPI
Bmi1	Phc1	0.573442	PPI
Abl1	Crkl	0.573442	PPI
Becn1	Gopc	0.573442	PPI
Smad4	Gata4	0.573442	PPI
Cbx5	Hdac9	0.573442	PPI
Hdac2	Foxp3	0.57082	PPI
Psmd2	Eed	0.57082	PPI
Tsc2	Tsc1	0.57082	PPI
Epc1	Kat5	0.57082	PPI
Rad21	Smc3	0.57082	PPI
Cbl	Cblb	0.57082	PPI
Epc2	Kat5	0.57082	PPI
Fmr1	Fxr1	0.57082	PPI
Kat5	Ing3	0.57082	PPI
Mef2d	Hdac4	0.57082	PPI
Dmd	Cav3	0.57082	PPI
Car11	Bcl10	0.57082	PPI
Grb2	Plcg1	0.57082	PPI
Rad21	Smc1a	0.57082	PPI
Cbl	Plcg1	0.57082	PPI
Casp8	Ripk1	0.57082	PPI
Lck	Ptprc	0.57082	PPI
Insr	Cav1	0.57082	PPI
Lat	Lcp2	0.57082	PPI
Rec8	Smc3	0.57082	PPI
Hdac1	Foxp3	0.57082	PPI
Actb	Kat5	0.57082	PPI
Wdr5	Kat2a	0.57082	PPI
Sept7	Sept5	0.57082	PPI
Ccnd1	Cdk2	0.57082	PPI
Sgcd	Dag1	0.57082	PPI
Vhl	Rbx1	0.57082	PPI
B9d2	Mks1	0.57082	PPI
Actb	Trpm7	0.57082	PPI
Gas1	Shh	0.569253	PPI
Gfi1b	Rcor2	0.568899	PPI
Cbx5	Senp7	0.568899	PPI
Egr2	Nab2	0.565243	PPI
Nr2c1	Kat2b	0.565243	PPI
Cbl	Zap70	0.56317	PPI
Traf2	Birc2	0.562199	PPI
Pcgf2	Phc1	0.562199	PPI
Nfe2	Ash2l	0.561338	PPI
Set	Pygm	0.56127	PPI
Smad1	Gata4	0.560815	PPI
Bmp7	Twsg1	0.560815	PPI
Hdac1	Hnf1b	0.560815	PPI
Lnx1	Numb	0.560815	PPI
Runx1	Foxp3	0.560815	PPI
Src	Dvl2	0.560815	PPI
Bag5	Gak	0.560815	PPI
Birc3	Htra2	0.560815	PPI
Sp3	Tbp	0.560815	PPI
Atf2	Brca1	0.560815	PPI
Ptpra	Ptprn	0.560815	PPI
Irf3	Tbk1	0.560815	PPI
Rnd3	Rock1	0.560815	PPI
Dmd	Sntg1	0.560815	PPI
Mdm2	Cebpb	0.560815	PPI
Mdm2	Ccng1	0.560815	PPI
Mdm2	Senp2	0.560815	PPI
Etv3	Ddx20	0.560815	PPI
Hdac1	Cry1	0.560815	PPI
Hdac1	Rbl2	0.560815	PPI
Dmd	Sntg2	0.560815	PPI
Nedd4	Wbp2	0.560815	PPI
Sox2	Xpo4	0.560815	PPI
Myd88	Rnf41	0.560815	PPI
Hdac2	Six3	0.560815	PPI
Nr4a2	Rcor1	0.560815	PPI
Vhl	Sumo1	0.560815	PPI
Pten	Xiap	0.560815	PPI
Birc3	Myd88	0.560815	PPI
Dab1	Cdk6	0.560815	PPI
Pparg	Pias2	0.560815	PPI
Msx2	Runx2	0.560815	PPI
Epc1	Srf	0.560815	PPI
Wnt5a	Fzd4	0.560815	PPI
Nek1	Wwtr1	0.560815	PPI
Creb1	Sox9	0.560815	PPI
Rnf41	Tbk1	0.560815	PPI
Cyld	Rnf31	0.560815	PPI
Csf1r	Thoc5	0.560815	PPI
Crocc	Klc3	0.560815	PPI
Sntg1	Dtna	0.560815	PPI
Enah	Apbb1	0.560815	PPI
Hdac2	Cry1	0.560815	PPI
Pias1	Tbp	0.560815	PPI
Ezh2	Atrx	0.560815	PPI
Ep300	Gata4	0.560815	PPI
Nedd4	Litaf	0.560815	PPI
Nedd4	Rnf11	0.560815	PPI
Six3	Mta1	0.560815	PPI
Smad7	Cblb	0.560815	PPI
Yap1	Tead2	0.560815	PPI
Dhx15	Nlrp6	0.560815	PPI
Irak1	Pin1	0.560815	PPI
Traf6	Mysm1	0.560815	PPI
Ep300	Ncoa1	0.560815	PPI
Ptprf	Fyn	0.560815	PPI
Bid	Bax	0.560815	PPI
Mpdz	Gpr37	0.560815	PPI
Ets1	Prdm1	0.560815	PPI
Axin1	Kif3a	0.560815	PPI
Cdk1	Nasp	0.560815	PPI
Sap18	Sufu	0.560248	PPI
Tlr4	Bcl10	0.559424	PPI
Jak2	Crlf2	0.559424	PPI
Ubc	Poli	0.557916	PPI
Ppia	Dlg4	0.557683	PPI
Nck2	Dok2	0.557683	PPI
Grb2	Snta1	0.554429	PPI
Tead4	Vgll4	0.554429	PPI
Cblb	Tcam1	0.553942	PPI
Nanog	Rest	0.553942	PPI
Phb	Rab32	0.553942	PPI
Hipk1	Mdm2	0.553942	PPI
Sp1	Nanog	0.553942	PPI
Phb2	Rab32	0.553942	PPI
Sox2	Sin3a	0.553942	PPI
Sall4	Mta2	0.553942	PPI
Lmx1b	Pspc1	0.553942	PPI
Pcgf2	Rybp	0.553942	PPI
Efnb2	Epha4	0.553942	PPI
Ooep	Tle6	0.553942	PPI
Pcgf2	Cbx7	0.553942	PPI
E2f1	Htra2	0.553762	PPI
Traf6	Tifa	0.552038	PPI
Fbxw7	Zeb2	0.552038	PPI
Axin1	Pias2	0.552038	PPI
Yap1	Runx1	0.552038	PPI
Actn3	Nrap	0.552038	PPI
Axin2	Gsk3b	0.552038	PPI
Socs1	Trim8	0.552038	PPI
Axin1	Pias1	0.552038	PPI
Daxx	Snw1	0.552038	PPI
Hcn3	Kctd3	0.552038	PPI
Esr1	Grip1	0.552038	PPI
Anxa6	Kcnq2	0.552038	PPI
Lhx3	Ldb1	0.552038	PPI
Kit	Socs6	0.552038	PPI
Chd8	Ctcf	0.552038	PPI
Pias3	Tbp	0.552038	PPI
Aip	Gna13	0.552038	PPI
Anxa6	Kcnq3	0.552038	PPI
Hdac1	Phb2	0.552038	PPI
Cnst	Gga1	0.552038	PPI
Pias3	Irf1	0.552038	PPI
Lhx3	Isl1	0.552038	PPI
Etv6	Kat5	0.552038	PPI
Fus	Srsf2	0.552038	PPI
Tbx1	Ash2l	0.552038	PPI
Nrap	Flnc	0.552038	PPI
Gga2	Cnst	0.552038	PPI
Rab4a	Cd2ap	0.552038	PPI
Asb6	Sh2b2	0.552038	PPI
Git1	Snx6	0.552038	PPI
Slx4	Mus81	0.552038	PPI
Sin3b	Myt1	0.552038	PPI
Vgll2	Mef2c	0.552038	PPI
Gorab	Scyl1	0.552038	PPI
Ptbp2	Nova1	0.552038	PPI
Ahi1	B9d1	0.551804	PPI
Tada1	Kat2a	0.551804	PPI
Actb	Lrrk2	0.551804	PPI
Gria2	Gria4	0.551804	PPI
Bbs1	Bbs2	0.551804	PPI
Kcnj4	Dlg4	0.551804	PPI
Axin1	Lrp6	0.551804	PPI
Taf9	Kat2a	0.551804	PPI
Becn1	Uvrag	0.551804	PPI
Taf5l	Kat2a	0.551804	PPI
Cdk9	Ccnt1	0.551804	PPI
Taf6l	Kat2a	0.551804	PPI
Lat	Cblb	0.551804	PPI
Bbs4	Bbs2	0.551804	PPI
Bbs7	Bbs2	0.551804	PPI
Pcgf2	Cbx8	0.551804	PPI
Tada3	Kat2a	0.551804	PPI
Cblb	Grb2	0.551804	PPI
Dmd	Dtna	0.551804	PPI
Cd8a	Lck	0.551368	PPI
Aip	Gnaq	0.550285	PPI
Hace1	Optn	0.550285	PPI
Bach1	Mafk	0.550285	PPI
Daxx	Sumo2	0.550285	PPI
Daxx	Sumo1	0.550285	PPI
Daxx	Hipk1	0.549915	PPI
Ubc	Tab3	0.549914	PPI
Ubc	Ubfd1	0.549914	PPI
Ubc	Psmd3	0.549914	PPI
Ubc	Epn2	0.549914	PPI
Lef1	Tdg	0.549029	PPI
Myo10	Neo1	0.548779	PPI
Fgfr3	Sh2b2	0.542599	PPI
Sap30	Sin3a	0.542527	PPI
Akt1	Trib3	0.542527	PPI
Il16	Kcnj2	0.540933	PPI
Bcar1	Pkn3	0.537778	PPI
Tbp	Gpbp1	0.53694	PPI
Traf6	Sra1	0.53694	PPI
Nrip1	Grip1	0.53694	PPI
Akt1	Parvb	0.53694	PPI
Casp6	Irak3	0.53694	PPI
Cry1	Sin3b	0.53694	PPI
Ubc	Gch1	0.53694	PPI
Myrf	Fbxw7	0.53694	PPI
Mcl1	Bbc3	0.536075	PPI
Aurka	Chfr	0.536075	PPI
Rab9b	Sgsm1	0.536075	PPI
Hmgb1	Mecp2	0.536075	PPI
Vdr	Baz1b	0.536075	PPI
Hmgb1	Relb	0.536075	PPI
Hmgb1	Tle1	0.536075	PPI
Omp	Bex2	0.536075	PPI
Fyn	Epha4	0.536075	PPI
Abl1	Rin1	0.536075	PPI
Tlk2	Tnik	0.535571	PPI
Stx1b	Vamp2	0.535571	PPI
Ap2a1	Tnik	0.535571	PPI
Ap2a1	Agap2	0.535571	PPI
Ctbp2	Tnik	0.535571	PPI
Tnik	Zc3h4	0.535571	PPI
Tnik	Syne1	0.535571	PPI
Tnik	Akap9	0.535571	PPI
Tnik	Abi1	0.535571	PPI
Tnik	Rcor1	0.535571	PPI
Tnik	Cdc73	0.535571	PPI
Tnik	Nat10	0.535571	PPI
Lrrk2	Gsk3b	0.535571	PPI
Agap2	Syne1	0.535571	PPI
Agap2	Lrrc7	0.535571	PPI
Agap2	Nbea	0.535571	PPI
Nanog	Wdr82	0.535571	PPI
Nanog	Ddx1	0.535571	PPI
Tnik	Camkv	0.535571	PPI
Tnik	Ptprd	0.535571	PPI
Tnik	Cdc5l	0.535571	PPI
Tnik	Erc2	0.535571	PPI
Tnik	Rcor2	0.535571	PPI
Tnik	Ank2	0.535571	PPI
Tnik	Ncor2	0.535571	PPI
Tnik	Carm1	0.535571	PPI
Tnik	Sept3	0.535571	PPI
Strn	Tnik	0.535571	PPI
Gnaz	Agap2	0.535571	PPI
Lmnb1	Tnik	0.535571	PPI
Matr3	Tsc1	0.535571	PPI
Bin1	Huwe1	0.535571	PPI
Kif5a	Tnik	0.535571	PPI
Pura	Fxr1	0.535571	PPI
Grm1	Agap2	0.535571	PPI
Agap2	Tln2	0.535571	PPI
Agap2	Rims2	0.535571	PPI
Agap2	Dclk1	0.535571	PPI
Herc2	Akap9	0.535571	PPI
Traf2	Ripk1	0.535571	PPI
Hdac1	Tle1	0.535571	PPI
Hdac1	Kdm5b	0.535571	PPI
Hdac1	Sall4	0.535571	PPI
Ulk1	Sesn2	0.535571	PPI
Anxa1	Nphp1	0.535571	PPI
Nanog	Cxxc5	0.535571	PPI
Srpk2	Fxr1	0.535571	PPI
Nanog	Rbp2	0.535571	PPI
Nanog	Tbl1x	0.535571	PPI
Nanog	Orc5	0.535571	PPI
Kif5c	Herc2	0.535571	PPI
Kif5c	Tsc1	0.535571	PPI
Nck2	Dok1	0.535571	PPI
Dab2	Grb2	0.535571	PPI
Epha4	Tsc1	0.535571	PPI
Wdr81	Huwe1	0.535571	PPI
Dok2	Dok1	0.535571	PPI
Tnik	Trio	0.535571	PPI
Tnik	Ngef	0.535571	PPI
Tnik	Bcr	0.535571	PPI
Tnik	Ccar2	0.535571	PPI
Tnik	Ehmt2	0.535571	PPI
Tnik	Gria3	0.535571	PPI
Tnik	Trim3	0.535571	PPI
Ret	Epha5	0.535571	PPI
Flnb	Iqcb1	0.535571	PPI
Stat3	Cdk6	0.535571	PPI
Wnk3	Tsc1	0.535571	PPI
Brca1	Suz12	0.535571	PPI
Abi1	Tsc1	0.535571	PPI
Hdac2	Sall4	0.535571	PPI
Ripk1	Atg5	0.535571	PPI
Ran	Tsc1	0.535571	PPI
Tnik	G3bp1	0.535571	PPI
Tnik	Zeb2	0.535571	PPI
Agap2	Grm5	0.535571	PPI
Nanog	Grhl2	0.535571	PPI
Nanog	Rbm4b	0.535571	PPI
Agap2	Rims1	0.535571	PPI
Agap2	Asap1	0.535571	PPI
Insr	Akt1	0.535571	PPI
Edc4	Fxr1	0.535571	PPI
Ntrk2	Gab1	0.535571	PPI
Fhl2	Ahi1	0.535571	PPI
Nanog	Wdr33	0.535571	PPI
Nanog	Akap8	0.535571	PPI
Nanog	Fiz1	0.535571	PPI
Tnik	Git1	0.535571	PPI
Tnik	Taok2	0.535571	PPI
Tnik	Syne2	0.535571	PPI
Tnik	Taf5	0.535571	PPI
Tnik	Matr3	0.535571	PPI
Tnik	Wasf1	0.535571	PPI
Tnik	Gsk3b	0.535571	PPI
Tnik	Magi2	0.535571	PPI
Tnik	Nos1	0.535571	PPI
Agap2	Actn1	0.535571	PPI
Agap2	Map1a	0.535571	PPI
Agap2	Gsk3b	0.535571	PPI
Kif2a	Fxr1	0.535571	PPI
Kif2a	Dlg4	0.535571	PPI
Clock	Kmt2a	0.535571	PPI
Strn	Fxr1	0.535571	PPI
Arnt	Npas1	0.535571	PPI
Abi1	Brk1	0.535571	PPI
Rybp	Pcgf6	0.535571	PPI
Prdx1	Crkl	0.535571	PPI
Atf2	Tle1	0.535571	PPI
Fus	Raly	0.535571	PPI
Kif5a	Dlg4	0.535571	PPI
Tradd	Ripk1	0.535571	PPI
Herc2	Syne2	0.535571	PPI
Herc2	Matr3	0.535571	PPI
Actb	Ahi1	0.535571	PPI
Actb	Nphp1	0.535571	PPI
Arf5	Dlg4	0.535571	PPI
Ulk1	Ntrk1	0.535571	PPI
Gna11	Agap2	0.535571	PPI
Gnaq	Agap2	0.535571	PPI
Gna13	Agap2	0.535571	PPI
Herc2	Flii	0.535571	PPI
Kif5c	Tnik	0.535571	PPI
Shc1	Lrrk1	0.535571	PPI
Azi2	Tbk1	0.535571	PPI
Lzts1	Tnik	0.535571	PPI
Trio	Agap2	0.535571	PPI
Bin1	Tnik	0.535571	PPI
Numbl	Agap2	0.535571	PPI
Sept7	Agap2	0.535571	PPI
Anxa1	Dysf	0.535571	PPI
Src	Agap2	0.535571	PPI
Kif2a	Tnik	0.535571	PPI
Stat3	Erbb2	0.535571	PPI
Brca1	Ezh2	0.535571	PPI
Strn4	Tnik	0.535571	PPI
Abi2	Tnik	0.535571	PPI
Rac1	Tnik	0.535571	PPI
Kif5c	Huwe1	0.535571	PPI
Nsf	Huwe1	0.535571	PPI
Kmt2b	Nanog	0.535571	PPI
Sall4	Mta1	0.535571	PPI
Herc2	Carm1	0.535571	PPI
Herc2	Ank2	0.535571	PPI
Sall4	Grhl2	0.535571	PPI
Jun	Cdk6	0.535571	PPI
Drd2	Dlg4	0.535571	PPI
Dlg4	Git1	0.535571	PPI
Dlg4	Tjap1	0.535571	PPI
Git1	Huwe1	0.535571	PPI
Mcm3	Herc2	0.535571	PPI
Mtf2	Eed	0.535571	PPI
Actn4	Iqcb1	0.535571	PPI
Fxr1	Ston2	0.535571	PPI
Fxr1	Tsc1	0.535571	PPI
Fxr1	Rbp2	0.535571	PPI
Fxr1	Cdc5l	0.535571	PPI
Fxr1	Ncor2	0.535571	PPI
Fxr1	Strap	0.535571	PPI
Cbx7	Pcgf6	0.535571	PPI
Smc3	Mecp2	0.535571	PPI
Aak1	Fxr1	0.535571	PPI
Stam2	Crk	0.535571	PPI
Nanog	Rbbp5	0.535571	PPI
Tal1	Kdm1a	0.535571	PPI
Nanog	Ehmt2	0.535571	PPI
Car10	Arrb1	0.535571	PPI
Actb	Iqcb1	0.535571	PPI
Wnk2	Tsc1	0.535571	PPI
Sin3a	Kdm5b	0.535571	PPI
Dlg4	Ank2	0.535571	PPI
Dlg4	Tsc1	0.535571	PPI
Nisch	Tsc1	0.535571	PPI
Scrib	Tsc1	0.535571	PPI
Itch	Rnf11	0.535571	PPI
Smc2	Tsc1	0.535571	PPI
Agap2	Pkn2	0.535571	PPI
Agap2	Luzp1	0.535571	PPI
Agap2	Wasf1	0.535571	PPI
Wasf1	Tsc1	0.535571	PPI
Agap2	Ank2	0.535571	PPI
Wdr91	Huwe1	0.535571	PPI
Agap2	Myo5a	0.535571	PPI
Agap2	Sept5	0.535571	PPI
Edc4	Rc3h1	0.535571	PPI
Nanog	Bcor	0.535571	PPI
Actb	Mks1	0.535571	PPI
Nanog	Pcgf6	0.535571	PPI
Nanog	Ilf2	0.535571	PPI
Nanog	Klf5	0.535571	PPI
Nanog	Rcor2	0.535571	PPI
Nanog	Sec13	0.535571	PPI
Sfpq	Tsc1	0.535571	PPI
Hcn1	Bsn	0.535571	PPI
Ctbp1	Kdm2b	0.535571	PPI
Cbl	Shc1	0.535571	PPI
Fxr1	Srsf1	0.535571	PPI
Cux1	Herc2	0.535571	PPI
Herc2	Kif11	0.535571	PPI
Rbbp4	Sall4	0.535571	PPI
Fxr1	Cnot1	0.535571	PPI
Fxr1	Akap8	0.535571	PPI
Fxr1	Tbk1	0.535571	PPI
Chd4	Sall4	0.535571	PPI
Fxr1	Nop56	0.535571	PPI
Iqcb1	Flnc	0.535571	PPI
Herc2	Rai1	0.535571	PPI
Iqcb1	Strn3	0.535571	PPI
Wdfy2	Foxo1	0.535571	PPI
Sall4	Tfcp2	0.535571	PPI
Sall4	Mta3	0.535571	PPI
Herc2	Fxr1	0.535571	PPI
Herc2	Kif15	0.535571	PPI
Herc2	Cnot1	0.535571	PPI
Brd7	Tnik	0.535571	PPI
Ctbp1	Tnik	0.535571	PPI
Rbbp4	Eed	0.535571	PPI
Rbbp7	Eed	0.535571	PPI
Sall4	Sall1	0.535571	PPI
Sall4	Sall2	0.535571	PPI
Sall4	Mbd3	0.535571	PPI
Anxa2	Nphp1	0.535571	PPI
Actn4	Agap2	0.535571	PPI
Cdc42	Agap2	0.535571	PPI
Lrrk2	Dvl3	0.535571	PPI
Fxr1	Akap9	0.535571	PPI
Fxr1	Ap2b1	0.535571	PPI
Fxr1	Top3b	0.535571	PPI
Phf20	Rbbp5	0.535571	PPI
Kdm2b	Yaf2	0.535571	PPI
Anxa2	Dysf	0.535571	PPI
Lmx1b	Sfpq	0.535571	PPI
Src	Insr	0.535571	PPI
Grik2	Tnik	0.535571	PPI
Car10	Arrb2	0.535571	PPI
Nf1	Agap2	0.535571	PPI
Mbtd1	Nanog	0.535571	PPI
Pum1	Nanog	0.535571	PPI
Cpne2	Grb2	0.535571	PPI
Lmnb2	Tnik	0.535571	PPI
Gria2	Tnik	0.535571	PPI
Lrrk1	Grb2	0.535571	PPI
Rbbp7	Sall4	0.535571	PPI
Lrrk2	Bag5	0.535571	PPI
Myd88	Btk	0.535571	PPI
Fxr1	Git1	0.535571	PPI
Enah	Agap2	0.535571	PPI
Fxr1	Nacc1	0.535571	PPI
Fxr1	Scrib	0.535571	PPI
Fxr1	Gsk3b	0.535571	PPI
Fxr1	Itsn1	0.535571	PPI
Fxr1	Pcm1	0.535571	PPI
Fxr1	Ilf3	0.535571	PPI
Fxr1	Keap1	0.535571	PPI
Hira	Nanog	0.535571	PPI
Kdm2b	Bcor	0.535571	PPI
Nanog	Ep400	0.535571	PPI
Nanog	Kat8	0.535571	PPI
Telo2	Mtor	0.535571	PPI
Hcn1	Tnik	0.535571	PPI
Hcn1	Pak3	0.535571	PPI
Gria1	Tnik	0.535571	PPI
Pde4a	Huwe1	0.535571	PPI
Src	Akt1	0.535571	PPI
Foxp2	Tnik	0.535571	PPI
Creb1	Ncor1	0.535571	PPI
Herc2	Myh10	0.535571	PPI
Herc2	Ddx3x	0.535571	PPI
Xrcc6	Huwe1	0.535571	PPI
Sall4	Mbd2	0.535571	PPI
Lmtk3	Fxr1	0.535571	PPI
Pak3	Fxr1	0.535571	PPI
Tsc1	Cul3	0.535571	PPI
Usp9x	Fxr1	0.535571	PPI
Tnik	Fxr1	0.535571	PPI
Tnik	Dlg4	0.535571	PPI
Dlg4	Syne2	0.535571	PPI
Tnik	Rims1	0.535571	PPI
Tnik	Nop56	0.535571	PPI
Avil	Crk	0.535571	PPI
Becn1	Nrbf2	0.535571	PPI
Birc6	Rnf41	0.535571	PPI
Bmi1	Cbx8	0.535571	PPI
Pkp1	Mks1	0.535571	PPI
Ntrk2	Dlg4	0.535571	PPI
Huwe1	Nos1	0.535571	PPI
Ezh1	Stk38	0.535571	PPI
Usp9x	Sall4	0.535571	PPI
Usp9x	Tsc1	0.535571	PPI
Lzts3	Kalrn	0.535571	PPI
Fxr1	Rcor2	0.535571	PPI
Fxr1	Ago1	0.535571	PPI
Kdm2b	Cbx8	0.535571	PPI
Kalrn	Pde4d	0.535571	PPI
Kif3a	Dlg4	0.535571	PPI
Kalrn	Ank2	0.535571	PPI
Axin1	Wwtr1	0.535571	PPI
Map1b	Iqcb1	0.535571	PPI
Hdac3	Mecp2	0.535571	PPI
Nedd4	Tsc1	0.535571	PPI
Wdr5	Sall4	0.535571	PPI
Nedd4	Fxr1	0.535571	PPI
Rac1	Tsc1	0.535571	PPI
Hdac2	Herc2	0.535571	PPI
Tnik	Huwe1	0.535571	PPI
Tnik	Dlg2	0.535571	PPI
Tnik	Strn3	0.535571	PPI
Tnik	Zmym2	0.535571	PPI
Tnik	Mpp5	0.535571	PPI
Bmi1	Kdm2b	0.535571	PPI
Ptprs	Tsc1	0.535571	PPI
Fxr1	Myef2	0.535571	PPI
Fxr1	Ccar2	0.535571	PPI
Smc1a	Mecp2	0.535571	PPI
Tnik	Grm5	0.535571	PPI
Tnik	Herc2	0.535571	PPI
Tnik	Ubn2	0.535571	PPI
Tnik	Myo5a	0.535571	PPI
Tnik	Tsc1	0.535571	PPI
Tnik	Dclk1	0.535571	PPI
Ezh2	Tle1	0.535571	PPI
Ezh2	Stk38	0.535571	PPI
Cdk5	Tsc1	0.535571	PPI
Stat1	Usf2	0.535571	PPI
Kdm1a	Tsc1	0.535571	PPI
Tsc1	Mink1	0.535571	PPI
Ubr4	Herc2	0.535571	PPI
Ring1	Bmi1	0.535571	PPI
Ring1	Kdm2b	0.535571	PPI
Hcn1	Gsk3b	0.535571	PPI
Hcn1	Dscam	0.535571	PPI
Eps15	Fxr1	0.535571	PPI
Setx	Ezh2	0.535571	PPI
Huwe1	Trim3	0.535571	PPI
Ctcf	Fxr1	0.535571	PPI
Nsf	Tnik	0.535571	PPI
Lmna	Nphp1	0.535571	PPI
Traf6	Ntrk1	0.535571	PPI
Usp9x	Tnik	0.535571	PPI
Mib1	Tbk1	0.535571	PPI
Fxr1	Wdr47	0.535571	PPI
Fxr1	Ubap2	0.535571	PPI
Fxr1	Tdrd3	0.535571	PPI
Atrx	Smc1a	0.535571	PPI
Flnc	Nphp1	0.535571	PPI
Chd7	Nanog	0.535571	PPI
Kalrn	Gria2	0.535571	PPI
Kalrn	Tnik	0.535571	PPI
Kalrn	Agap2	0.535571	PPI
Kalrn	Pkp4	0.535571	PPI
Tsc1	Trim3	0.535571	PPI
Kalrn	Trio	0.535571	PPI
Tpr	Tnik	0.535571	PPI
Ank3	Tnik	0.535571	PPI
Zfr	Nanog	0.535571	PPI
Ntrk2	Plcg1	0.535571	PPI
Ap2a2	Agap2	0.535571	PPI
Nedd4	Agap2	0.535571	PPI
Hdac2	Tnik	0.535571	PPI
Dlg4	Syne1	0.535571	PPI
Huwe1	Hook3	0.535571	PPI
Huwe1	Kank2	0.535571	PPI
Tanc2	Tnik	0.535571	PPI
Lzts3	Tnik	0.535571	PPI
Ptprs	Tnik	0.535571	PPI
Dok1	Grb2	0.535571	PPI
Wiz	Tnik	0.535571	PPI
Setx	Eed	0.535571	PPI
Otud5	Ubr5	0.535571	PPI
Insr	Arrb2	0.535571	PPI
Fxr1	Dido1	0.535571	PPI
Fxr1	Pak2	0.535571	PPI
Fxr1	Ccar1	0.535571	PPI
Fxr1	Ilf2	0.535571	PPI
Atrx	Smc3	0.535571	PPI
Akap3	Brap	0.535571	PPI
Tnik	Hira	0.535571	PPI
Tnik	Ddx3x	0.535571	PPI
Tnik	Pcdh8	0.535571	PPI
Tnik	Lrrc7	0.535571	PPI
Tnik	Kctd9	0.535571	PPI
Tnik	Dlg1	0.535571	PPI
Tnik	Kif2c	0.535571	PPI
Tnik	Nbea	0.535571	PPI
Tnik	Ap2b1	0.535571	PPI
Pkp1	Agap2	0.535571	PPI
Ezh2	Nanog	0.535571	PPI
Atm	Telo2	0.535571	PPI
Ank3	Dlg4	0.535571	PPI
Kalrn	Dlg2	0.535571	PPI
Gnai1	Agap2	0.535571	PPI
Axin1	Lrrk2	0.535571	PPI
Hcn1	Mpdz	0.535571	PPI
Hcn1	Dlg1	0.535571	PPI
Dcx	Tnik	0.535571	PPI
Rara	Snw1	0.535571	PPI
Cdk5	Agap2	0.535571	PPI
Xrcc5	Huwe1	0.535571	PPI
Dlg3	Tnik	0.535571	PPI
Rbx1	Cul4a	0.535571	PPI
Crk	Plec	0.535571	PPI
Wdr5	Phf20	0.535571	PPI
Dok2	Src	0.534326	PPI
Sept7	Hdac6	0.534326	PPI
Epor	Plcg1	0.534326	PPI
Cebpa	Foxo1	0.534326	PPI
Itpr1	Erp44	0.534326	PPI
Lyn	Efs	0.533921	PPI
Akap1	Siah2	0.530698	PPI
Map1b	Scn8a	0.528971	PPI
Atf4	Trib3	0.528971	PPI
Whrn	Rpgr	0.528971	PPI
Cspg4	Grip1	0.528971	PPI
Dlg4	Nrcam	0.528971	PPI
Grid2	Gopc	0.528971	PPI
Nrcam	Dlg1	0.528971	PPI
Ifrd1	Sin3b	0.528536	PPI
Fyn	Sphk2	0.527414	PPI
Ssr4	Dlg4	0.527414	PPI
Lamc1	Lamb1	0.527414	PPI
Flt3	Socs6	0.527414	PPI
Ssr1	Dlg4	0.527414	PPI
Cbx2	Rybp	0.527414	PPI
Casp4	Gsdmd	0.527414	PPI
Cflar	Itch	0.527414	PPI
Eya1	Six4	0.526891	PPI
Men1	Pparg	0.526891	PPI
Bmi1	Dmap1	0.526891	PPI
Ep300	Nupr1	0.526891	PPI
Tcea1	Eaf2	0.526891	PPI
Six5	Eya1	0.526891	PPI
Eya1	Dach1	0.526891	PPI
Ctbp2	Klf3	0.526891	PPI
Actb	Cotl1	0.526891	PPI
Evl	Trim9	0.526891	PPI
Bcl2	Cpt1a	0.526891	PPI
Gnai2	Eya1	0.526891	PPI
Ctbp2	Fhl3	0.526891	PPI
Gnaz	Eya1	0.526891	PPI
Jun	Hhex	0.526891	PPI
Irf1	Sumo1	0.526891	PPI
Id3	Id4	0.526891	PPI
Psme3	Casp7	0.526891	PPI
Csf1r	Plcg2	0.526891	PPI
Akap9	Tsnax	0.526891	PPI
Mef2c	Carm1	0.526891	PPI
Ubc	Rev1	0.526891	PPI
Grap2	Csf1r	0.526378	PPI
Ubxn1	Ngly1	0.526378	PPI
Socs2	Lepr	0.525709	PPI
Tex14	Cep55	0.522557	PPI
Eed	Psmd6	0.521085	PPI
Eed	Eif3f	0.521085	PPI
Traf5	Srsf1	0.521085	PPI
Egr2	Pias2	0.51943	PPI
Invs	Iqcb1	0.516203	PPI
Gfi1b	Rcor3	0.516203	PPI
Hdac1	Gfi1b	0.516203	PPI
Gfi1b	Hdac2	0.516203	PPI
Efnb2	Reln	0.515255	PPI
Wnt5a	Porcn	0.515255	PPI
Wnt6	Porcn	0.515255	PPI
Tet1	Sin3a	0.515255	PPI
Rc3h1	Ago2	0.515255	PPI
Iqcb1	Nphp1	0.515255	PPI
Adrb2	Erbb2	0.515255	PPI
Kdm6b	Phf20	0.515255	PPI
Esr2	Fos	0.515255	PPI
Atrip	Atr	0.515255	PPI
Bin1	Mtm1	0.515255	PPI
Epor	Plcg2	0.515255	PPI
Lyn	Plcg2	0.515255	PPI
Ddit3	Atf4	0.515255	PPI
Src	Csf1	0.515255	PPI
Per2	Pml	0.515255	PPI
Apoe	Clcf1	0.515255	PPI
Terf1	Dna2	0.515255	PPI
Med19	Med31	0.515255	PPI
Wnt4	Porcn	0.515255	PPI
Wnt3a	Porcn	0.515255	PPI
Hdac1	Dnmt1	0.515255	PPI
Lepr	Jak2	0.515255	PPI
Reln	Lrp8	0.515255	PPI
Irf1	Myd88	0.515255	PPI
Traf6	Ern1	0.515255	PPI
Hdac1	Skor1	0.515255	PPI
Socs5	Egfr	0.515255	PPI
Runx2	Hdac4	0.515255	PPI
Hdac1	Satb2	0.515255	PPI
Wnt7b	Porcn	0.515255	PPI
Mks1	Ahi1	0.515255	PPI
Wsb1	Lrrk2	0.515255	PPI
Ezh1	Ehmt2	0.515255	PPI
Kif17	Kcnd2	0.515255	PPI
Ptpro	Wnt3a	0.515255	PPI
Dnmt1	Brap	0.515255	PPI
Ezh2	Ehmt2	0.515255	PPI
Spi1	Nono	0.515255	PPI
Akt1	Hdac6	0.515255	PPI
Terf2	Dna2	0.515255	PPI
Daxx	Stk4	0.515255	PPI
Smad6	Axin1	0.515255	PPI
Klf10	Itch	0.515255	PPI
E2f5	Tfdp2	0.515255	PPI
Hax1	Htra2	0.515255	PPI
Smad7	Axin1	0.515255	PPI
Fgr	Clnk	0.515255	PPI
Irak1	Peli2	0.515255	PPI
Satb2	Mta2	0.515255	PPI
Tle1	Skor1	0.515255	PPI
Axin1	Smad3	0.515255	PPI
Smad4	Ski	0.515255	PPI
Bcl6	Tbx21	0.515255	PPI
Phc1	Phc2	0.515255	PPI
Irak1	Tifa	0.515255	PPI
Hmga2	Taf3	0.513252	PPI
Nfe2	Ehmt2	0.513183	PPI
Ctbp2	Sall4	0.51277	PPI
Pura	Tnik	0.51277	PPI
Tnik	Nlgn2	0.51277	PPI
Ddb1	Trpm7	0.51277	PPI
Nanog	Taf9	0.51277	PPI
Nanog	Dmap1	0.51277	PPI
Strn	Agap2	0.51277	PPI
Tnik	Kdm1a	0.51277	PPI
Tnik	Paf1	0.51277	PPI
Ddb1	Iqcb1	0.51277	PPI
Agap2	Sik3	0.51277	PPI
Gpm6a	Vamp2	0.51277	PPI
Gata1	E2f2	0.51277	PPI
Nucb1	Iqcb1	0.51277	PPI
Tnik	Arc	0.51277	PPI
Tbx1	Setd7	0.51277	PPI
Agap2	Ppm1e	0.51277	PPI
Rap2b	Tsc1	0.51277	PPI
Pura	Huwe1	0.51277	PPI
Tnik	Chd8	0.51277	PPI
Tnik	Pcm1	0.51277	PPI
Pura	Tsc1	0.51277	PPI
Agap2	Ube4b	0.51277	PPI
Agap2	Sacs	0.51277	PPI
Agap2	Ncdn	0.51277	PPI
Nanog	Uchl5	0.51277	PPI
Tradd	Tlr4	0.51277	PPI
Ppm1h	Fxr1	0.51277	PPI
Btk	Tcam1	0.51277	PPI
Dffb	Nanog	0.51277	PPI
Dhx9	Nanog	0.51277	PPI
Stam2	Aldoa	0.51277	PPI
Arpc4	Herc2	0.51277	PPI
Mtf2	Stk38	0.51277	PPI
Kdm2b	Kdm1a	0.51277	PPI
Rab14	Tsc1	0.51277	PPI
Gria2	Tmub1	0.51277	PPI
Senp1	Fxr1	0.51277	PPI
Dcx	Dlg4	0.51277	PPI
Bend3	Sall4	0.51277	PPI
Nanog	Bnc2	0.51277	PPI
Grip1	Tmub1	0.51277	PPI
Ampd2	Tsc1	0.51277	PPI
Hcn1	Nf1	0.51277	PPI
Dcx	Tsc1	0.51277	PPI
Iqcb1	Aifm1	0.51277	PPI
Sall4	Cxxc5	0.51277	PPI
Anxa2	Agap2	0.51277	PPI
Pcna	Agap2	0.51277	PPI
Agap2	Pqbp1	0.51277	PPI
Eri1	Lsm1	0.51277	PPI
Nanog	Rybp	0.51277	PPI
Fxr1	Exog	0.51277	PPI
Hcn1	Asic1	0.51277	PPI
Dlg4	Rab14	0.51277	PPI
Usp9x	Agap2	0.51277	PPI
Fxr1	Nat10	0.51277	PPI
Fxr1	Snw1	0.51277	PPI
Cnot1	Nanog	0.51277	PPI
Ice1	Mtf2	0.51277	PPI
Fxr1	Bcor	0.51277	PPI
Hcn1	Git1	0.51277	PPI
Tnik	Edc4	0.51277	PPI
Tnik	Lsg1	0.51277	PPI
Tnik	Tdrd3	0.51277	PPI
Grik3	Fxr1	0.51277	PPI
Tpx2	Nanog	0.51277	PPI
Tdrd3	Tsc1	0.51277	PPI
Men1	Nanog	0.51277	PPI
Vps72	Nanog	0.51277	PPI
Socs1	Pim2	0.511952	PPI
Nedd4	Wbp1	0.511952	PPI
Cd22	Plcg1	0.511952	PPI
Traf3	Mysm1	0.511952	PPI
Stk40	Rcn2	0.511952	PPI
Abl1	Cish	0.511952	PPI
Rasd1	Cenpb	0.508108	PPI
Rasd1	Pls1	0.508108	PPI
Dab2	Pias2	0.506451	PPI
Sap25	Sin3a	0.505694	PPI
Lepr	Plcg1	0.505694	PPI
Ephb2	Grip1	0.505694	PPI
Dab1	Lrp1	0.505694	PPI
Rab6a	Bicd2	0.505694	PPI
Rxra	Asxl1	0.505694	PPI
Sumo1	Ikzf1	0.505694	PPI
Mast2	Sntb2	0.505694	PPI
Dapk3	Pawr	0.505694	PPI
Nlk	Hipk2	0.505694	PPI
Myb	Hipk2	0.505694	PPI
Eps15	Itsn1	0.505694	PPI
Lrp2	Dab1	0.505694	PPI
Tra2a	Srsf7	0.505694	PPI
Rp9	Cir1	0.505694	PPI
Smap2	Smap1	0.505694	PPI
Bcar1	Nphp1	0.505694	PPI
Sntb2	Mast1	0.505694	PPI
Lrp2	Dlg4	0.505694	PPI
Lrp2	Gipc1	0.505694	PPI
Mxi1	Sin3b	0.505694	PPI
Pick1	Jam3	0.505694	PPI
Pick1	Asic2	0.505694	PPI
Mxi1	Sin3a	0.505694	PPI
Bcl2	Bag1	0.505694	PPI
Fzd7	Dlg4	0.505694	PPI
Akap8	Fign	0.505694	PPI
Grb2	Btla	0.504961	PPI
Apoe	Set	0.504961	PPI
Calca	Ide	0.504961	PPI
Sun1	Tsnax	0.50446	PPI
Meig1	Pacrg	0.503939	PPI
Reps2	Asap1	0.503939	PPI
Map1b	Nxf1	0.503939	PPI
Bach1	Xpo1	0.501027	PPI
Ncam1	Cntn2	0.501027	PPI
Neil2	Keap1	0.501027	PPI
Sfrp2	Tll1	0.501027	PPI
Fgf2	Fgfr2	0.501027	PPI
Sntb1	Nos1	0.501027	PPI
Traf6	Arrb1	0.501027	PPI
Smad1	Kat2b	0.501027	PPI
Bid	Casp3	0.501027	PPI
Aurka	Fbxl7	0.501027	PPI
Spi1	Prdm1	0.501027	PPI
Ep300	Mecp2	0.501027	PPI
Lrp2	Ubc	0.501027	PPI
Otud4	Ubc	0.501027	PPI
Nedd8	Uchl3	0.501027	PPI
Ssr2	Dlg4	0.501027	PPI
Socs1	Cul5	0.501027	PPI
Grap2	Shc1	0.501027	PPI
Cdk5	Dab1	0.501027	PPI
Nedd4	Scn9a	0.501027	PPI
Nedd4	Scn5a	0.501027	PPI
Nedd4	Scn8a	0.501027	PPI
Ptma	Keap1	0.501027	PPI
Cebpb	Sin3a	0.501027	PPI
Hap1	Ubc	0.501027	PPI
Mcm4	Keap1	0.501027	PPI
Cdc27	Ubc	0.501027	PPI
Ddi2	Ubc	0.501027	PPI
Mcl1	Gsk3b	0.501027	PPI
Sfrp2	Bmp1	0.501027	PPI
Ep300	Creb1	0.501027	PPI
Ep300	Kat2a	0.501027	PPI
Ntrk1	Shc3	0.501027	PPI
Ascc3	Ubc	0.501027	PPI
Sprtn	Ubc	0.501027	PPI
Arrb2	Gsk3b	0.501027	PPI
Lasp1	Zyx	0.501027	PPI
Gfra3	Artn	0.501027	PPI
Sgsm2	Rab9b	0.501027	PPI
Ubr4	Ubc	0.501027	PPI
Abl1	Fmn1	0.501027	PPI
Sntb2	Nos1	0.501027	PPI
Hdac2	Ddx20	0.501027	PPI
Yap1	Tead4	0.501027	PPI
Yap1	Tead3	0.501027	PPI
Cul5	Socs6	0.501027	PPI
Bid	Mcl1	0.501027	PPI
Sdk2	Dscam	0.501027	PPI
Nrp1	Vegfa	0.501027	PPI
Ccnd2	Set	0.501027	PPI
Cdk1	Uba1	0.501027	PPI
Fgf2	Fgfr1	0.501027	PPI
Ryr1	Trdn	0.501027	PPI
Msx1	Mc4r	0.501027	PPI
Cdk2	Brca2	0.501027	PPI
Eps15	Dab2	0.501027	PPI
Flrt1	Unc5a	0.501027	PPI
Cdk4	Set	0.501027	PPI
Fos	Jund	0.501027	PPI
Cebpb	Cebpa	0.501027	PPI
Phc1	Scmh1	0.501027	PPI
Grap2	Gab1	0.501027	PPI
Fos	Rit2	0.501027	PPI
Fos	Hhex	0.501027	PPI
Socs7	Cul5	0.501027	PPI
Lasp1	Lpp	0.501027	PPI
Trdn	Casq1	0.501027	PPI
Tle4	Six6	0.501027	PPI
Smad7	Dvl1	0.501027	PPI
Abl1	Enah	0.501027	PPI
Cdk4	Pura	0.501027	PPI
Ncam1	Dscam	0.501027	PPI
Sntb2	Dtna	0.501027	PPI
Omp	Bex1	0.501027	PPI
Jun	Casp9	0.501027	PPI
Ubc	G3bp1	0.501027	PPI
Ubc	Herc2	0.501027	PPI
Ubc	Ube3c	0.501027	PPI
Mcm7	Keap1	0.501027	PPI
Ubc	Ascc2	0.501027	PPI
Ubc	Plrg1	0.501027	PPI
Ubc	Myo5a	0.501027	PPI
Casp8	Cyld	0.501027	PPI
Efnb2	Ephb2	0.501027	PPI
Flrt2	Unc5d	0.501027	PPI
Flrt2	Unc5b	0.501027	PPI
Birc2	Htra2	0.501027	PPI
Fos	Optn	0.501027	PPI
Fos	Atf7	0.501027	PPI
Ddx20	Ncor2	0.501027	PPI
Ubb	Polk	0.501027	PPI
Irs1	Crk	0.501027	PPI
Psme3	Casp3	0.501027	PPI
Fyn	Fmn1	0.501027	PPI
Dvl1	Smad2	0.501027	PPI
Ccr2	Ccl7	0.501027	PPI
Ubc	Fcho2	0.501027	PPI
Flrt2	Unc5a	0.501027	PPI
Sp1	Pparg	0.501027	PPI
Bcl2	Bag4	0.501027	PPI
Ubc	Ibtk	0.501027	PPI
Fyn	Cd36	0.501027	PPI
Enah	Zyx	0.501027	PPI
Cntn3	Flrt1	0.501027	PPI
Ubc	Flnb	0.501027	PPI
Ubc	Hip1	0.501027	PPI
Rara	Ncoa1	0.501027	PPI
Dtnb	Sntb2	0.501027	PPI
Ubc	Ubl7	0.501027	PPI
Eln	Loxl1	0.501027	PPI
Akt2	Gsk3b	0.501027	PPI
Uhrf1	Mus81	0.501027	PPI
Mbp	Ksr1	0.501027	PPI
Ubc	Itpr3	0.501027	PPI
Ubc	Mcl1	0.501027	PPI
Ubc	Uba1	0.501027	PPI
Ubc	Faf2	0.501027	PPI
Ubc	Lmtk2	0.501027	PPI
Ubc	Ubac1	0.501027	PPI
Ubc	Riok3	0.501027	PPI
Ubc	Nvl	0.501027	PPI
Ubc	Lactb	0.501027	PPI
Ubc	Palld	0.501027	PPI
Ubc	Cul3	0.501027	PPI
Ubc	Trip4	0.501027	PPI
Ubc	Plec	0.501027	PPI
Fmnl3	Fmnl1	0.501027	PPI
Aplp1	Aplp2	0.501027	PPI
Ubc	Xrcc6	0.501027	PPI
Ubc	Ube2n	0.501027	PPI
Ubc	Rac1	0.501027	PPI
Ubc	Snx27	0.501027	PPI
Ubc	Ddx46	0.501027	PPI
Ubc	Ubap1	0.501027	PPI
Ubc	Ubr5	0.501027	PPI
Ubc	Myh9	0.501027	PPI
Src	Enah	0.501027	PPI
Ubc	Actn1	0.501027	PPI
Ubc	Ube4b	0.501027	PPI
Ubc	Rad18	0.501027	PPI
Ubc	Sart3	0.501027	PPI
Cdk1	Pura	0.501027	PPI
Ccnb1	Pura	0.501027	PPI
Itk	Lcp2	0.501027	PPI
Sntg2	Dtna	0.501027	PPI
Bcl2	Bag3	0.501027	PPI
Snai1	Hif1a	0.501027	PPI
Fyn	Enah	0.501027	PPI
Cish	Cul5	0.501027	PPI
Dvl1	Smad1	0.501027	PPI
Dvl1	Smad4	0.501027	PPI
Ntng2	Lrrc4	0.501027	PPI
Mbp	Lrrk2	0.501027	PPI
Mcmbp	Keap1	0.501027	PPI
Socs4	Cul5	0.501027	PPI
Ubc	Dnmt1	0.501027	PPI
Wnt5a	Ror2	0.501027	PPI
Ccnb1	Fzr1	0.501027	PPI
Irs1	Igf1r	0.501027	PPI
Ubc	Rfc1	0.501027	PPI
Senp1	Hif1a	0.501027	PPI
Sp3	Sp1	0.501027	PPI
Ccnd1	Pura	0.501027	PPI
Ubc	Kif15	0.501027	PPI
Pura	Ccna2	0.501027	PPI
Pura	Ccnh	0.501027	PPI
Ubc	Tab1	0.501027	PPI
Ubc	Klhl2	0.501027	PPI
Ubc	Gga1	0.501027	PPI
Mcl1	Bmf	0.501027	PPI
Ubc	Brap	0.501027	PPI
Ubc	Vps28	0.501027	PPI
Ubc	Rgs19	0.501027	PPI
Dtnb	Sntg1	0.501027	PPI
Wnt3a	Sfrp2	0.501027	PPI
Wnt3a	Sfrp1	0.501027	PPI
Net1	Unc5d	0.501027	PPI
Socs5	Cul5	0.501027	PPI
Ubc	Tnip1	0.501027	PPI
Src	Efs	0.501027	PPI
Akt1	Sox2	0.501027	PPI
Cebpa	Trib2	0.501027	PPI
Cebpa	Trib1	0.501027	PPI
Dffa	Casp3	0.501027	PPI
Efna5	Ephb2	0.501027	PPI
Brca1	Nf1	0.501027	PPI
Ulk1	Atg13	0.501027	PPI
Bard1	Ubc	0.501027	PPI
Ubc	Pcnt	0.501027	PPI
Ubc	Cbr1	0.501027	PPI
Ubc	Faf1	0.501027	PPI
Ubc	Uimc1	0.501027	PPI
Ubc	Pml	0.501027	PPI
Ubc	Traf4	0.501027	PPI
Ubc	Ston2	0.501027	PPI
Ubc	Peli1	0.501027	PPI
Ubc	Uba6	0.501027	PPI
Ubc	Ltbp1	0.501027	PPI
Ubc	Fcho1	0.501027	PPI
Ubc	Mib2	0.501027	PPI
Rxra	Pparg	0.501027	PPI
Ubc	Bag6	0.501027	PPI
Ubc	Pdpk1	0.501027	PPI
Gata1	Ppara	0.501027	PPI
Socs5	Jak2	0.501027	PPI
Lef1	Hmgb2	0.501027	PPI
Il16	Casp3	0.501027	PPI
Mcm6	Keap1	0.501027	PPI
Ilk	Mbp	0.501027	PPI
Ran	Rcc1	0.501027	PPI
Rock1	Casp3	0.501027	PPI
Rock1	Casp7	0.501027	PPI
Ncoa1	Carm1	0.501027	PPI
Runx2	Tle1	0.501027	PPI
Gsk3a	Akt2	0.501027	PPI
Src	Trpc6	0.501027	PPI
Src	Trpc5	0.501027	PPI
Unc5c	Net1	0.501027	PPI
Ube2n	Rnf41	0.501027	PPI
Flot1	Cd36	0.501027	PPI
Net1	Unc5a	0.501027	PPI
Ercc2	Ubc	0.501027	PPI
Birc3	Casp3	0.501027	PPI
Src	Trpc2	0.501027	PPI
Src	Frs2	0.501027	PPI
Bcl2	Cdk2	0.501027	PPI
Rad51	Sfr1	0.501027	PPI
Cd44	Tiam1	0.501027	PPI
Lama1	Dag1	0.501027	PPI
Lbr	Cbx5	0.501027	PPI
Taok1	Lrrk2	0.501027	PPI
Cebpb	Gsk3b	0.501027	PPI
Ets2	Prdm1	0.501027	PPI
Irf1	Tbk1	0.501027	PPI
Birc3	Traf3	0.501027	PPI
Pura	Ccne1	0.501027	PPI
Il4	Il2rg	0.501027	PPI
Traf2	Tbk1	0.501027	PPI
Dtnb	Sntg2	0.501027	PPI
Dtnb	Sntb1	0.501027	PPI
Hspb1	Mapk3	0.501027	PPI
Unc5c	Flrt2	0.501027	PPI
Ppara	Gata4	0.501027	PPI
Lck	Cblb	0.501027	PPI
Birc3	Casp9	0.501027	PPI
Wnt3a	Sfrp4	0.501027	PPI
Birc3	Ubc	0.501027	PPI
Cblb	Ube2c	0.501027	PPI
Hdac1	Klf13	0.501027	PPI
Ube2n	Rnf8	0.501027	PPI
Ubc	Aplp2	0.501027	PPI
Ubc	Xiap	0.501027	PPI
Ubc	Myh10	0.501027	PPI
Ubc	Slx4	0.501027	PPI
Ubc	Ubxn7	0.501027	PPI
Ubc	Herc4	0.501027	PPI
Ubc	Tbl3	0.501027	PPI
Ubc	Nde1	0.501027	PPI
Ubc	Cul2	0.501027	PPI
Ubc	Gipc1	0.501027	PPI
Src	Trpc1	0.501027	PPI
Hdac1	Crem	0.501027	PPI
Lef1	Tle4	0.501027	PPI
Kif5c	Klc3	0.501027	PPI
Acvr1	Inha	0.501027	PPI
Mcm3	Mcmbp	0.501027	PPI
Hdac1	Msx2	0.501027	PPI
Rgs9	Gnb5	0.501027	PPI
Gsk3a	Arrb2	0.501027	PPI
Vasp	Trim9	0.501027	PPI
Ubc	Brca1	0.501027	PPI
Ubc	Nub1	0.501027	PPI
Ubc	Strn4	0.501027	PPI
Ubc	Btbd1	0.501027	PPI
Sap18	Ubc	0.501027	PPI
Ubc	Ubxn6	0.501027	PPI
Ubc	Psmd8	0.501027	PPI
Ubc	Amfr	0.501027	PPI
Ubc	Cul5	0.501027	PPI
Ubc	Itsn1	0.501027	PPI
Ubc	Keap1	0.501027	PPI
Src	Trpc4	0.501027	PPI
Mcm3	Keap1	0.501027	PPI
Ubc	Ppm1b	0.501027	PPI
Kdm5a	Suz12	0.501027	PPI
Ubc	Nsf	0.501027	PPI
Ubc	Pa2g4	0.501027	PPI
Mafg	Nfe2	0.501027	PPI
Vasp	Lasp1	0.501027	PPI
Shc1	Ntrk1	0.501027	PPI
Ccna2	E2f1	0.501027	PPI
Sin3a	Klf13	0.501027	PPI
Ubc	Actn4	0.501027	PPI
Ube2n	Chfr	0.501027	PPI
Lmna	Mlip	0.500508	PPI
Hdac2	Rcor2	0.500488	PPI
Ccnd1	Nrf1	0.500488	PPI
Acad9	Ecsit	0.500488	PPI
Cebpa	Ash2l	0.500488	PPI
Gas1	Cdon	0.500488	PPI
Cebpa	Rbbp5	0.500488	PPI
Hdac1	Chd4	0.500488	PPI
Sox2	Chd4	0.500488	PPI
Klf4	Chd4	0.500488	PPI
Malt1	Ripk1	0.500488	PPI
Ripk1	Car11	0.500488	PPI
Ripk1	Tlr4	0.500488	PPI
Mafg	Bach1	0.500488	PPI
Nr4a1	Mta2	0.500488	PPI
Cbx3	Senp7	0.500488	PPI
Epn1	Ehd2	0.500488	PPI
Epn1	Ehd1	0.500488	PPI
Ldb2	Ssbp3	0.500488	PPI
Lats1	Mark4	0.500488	PPI
Rel	Nfkb1	0.500488	PPI
Cebpa	Dpy30	0.500488	PPI
Efnb1	Efnb2	0.500488	PPI
Clock	Ddb1	0.500488	PPI
Hdac1	Per2	0.500488	PPI
Jun	Mecom	0.500488	PPI
Gas1	Boc	0.500488	PPI
Nr4a1	Pelp1	0.500488	PPI
Dab2	Pard3	0.500488	PPI
Hdac1	Bach1	0.500488	PPI
Fosb	Mecom	0.500488	PPI
Lyn	Gab2	0.500488	PPI
Mtss1	Pard3	0.500488	PPI
Clgn	Pdilt	0.500488	PPI
Per2	Cbx3	0.500488	PPI
Bmi1	Hells	0.500488	PPI
Cbx2	Hells	0.500488	PPI
Nfkb1	Akap8	0.500488	PPI
Phb2	Phb	0.500488	PPI
Ntrk2	Cdk5	0.500488	PPI
Parp1	Hdac2	0.500488	PPI
Bcl6	Bcor	0.500488	PPI
Ntrk1	Ulk2	0.500488	PPI
Ncor1	Mecp2	0.500488	PPI
Frem1	Fras1	0.500488	PPI
Myc	Chd4	0.500488	PPI
Hap1	Hgs	0.500488	PPI
Daxx	Atrx	0.500488	PPI
Cbx1	Senp7	0.500488	PPI
Men1	Nr1h3	0.500488	PPI
Stat1	Usf1	0.500488	PPI
Dcc	Dscam	0.500488	PPI
Epn3	Ehd1	0.500488	PPI
Yap1	Ddx17	0.500488	PPI
Chd4	Mbd3	0.500488	PPI
Wdr76	Clock	0.500488	PPI
Axin1	Dvl3	0.500488	PPI
Nfkb1	Ncor1	0.500488	PPI
Becn1	Hmgb1	0.500488	PPI
Bach1	Ncor1	0.500488	PPI
Ryr2	Plce1	0.500488	PPI
Hdac3	Ncor1	0.500488	PPI
Grap2	Lcp2	0.500488	PPI
Fos	Mecom	0.500488	PPI
Ntrk2	Hgs	0.500488	PPI
Cdk8	Smc3	0.500488	PPI
Pcgf2	Hells	0.500488	PPI
Scrib	Mark4	0.500488	PPI
Cebpa	Kdm1a	0.500488	PPI
Calr3	Pdilt	0.500488	PPI
Adrb2	Cav3	0.500488	PPI
Cbl	Ddx58	0.500488	PPI
Nipbl	Med23	0.500488	PPI
Nipbl	Cdk8	0.500488	PPI
Nipbl	Smc3	0.500488	PPI
Frem2	Fras1	0.500488	PPI
Cdk8	Med15	0.500488	PPI
Efnb2	Pard3	0.500488	PPI
Tal1	Rcor1	0.500488	PPI
Wnt5a	Wls	0.500488	PPI
Wnt3	Wls	0.500488	PPI
Brdt	Ccnt1	0.500488	PPI
Med6	Med29	0.500488	PPI
Ehd2	Epn3	0.500488	PPI
Nipbl	Smc1a	0.500488	PPI
Car10	Lpar1	0.500488	PPI
Mef2c	Hipk2	0.500488	PPI
Mark4	Stk11	0.500488	PPI
Il16	Kcnd1	0.493802	PPI
Dffb	Vps28	0.493319	PPI
Abi1	Diap3	0.493319	PPI
Fmr1	Rcan1	0.493319	PPI
Hax1	Parl	0.493319	PPI
Nphp4	Iqcb1	0.493319	PPI
Spag8	Fhl5	0.493319	PPI
Ap2a1	Fxr1	0.488907	PPI
Agap2	Ap2b1	0.488907	PPI
Dok2	Nck1	0.488907	PPI
Agap2	Nrcam	0.488907	PPI
Agap2	Pclo	0.488907	PPI
Tnik	Soga3	0.488907	PPI
Agap2	Map6	0.488907	PPI
Agap2	Grm3	0.488907	PPI
Lcp2	Cd6	0.488907	PPI
Ripk1	Rnf11	0.488907	PPI
Herc2	Map6	0.488907	PPI
Pum2	Nanog	0.488907	PPI
Tmed9	Tsc1	0.488907	PPI
Ap2a2	Fxr1	0.488907	PPI
Fxr1	Fyco1	0.488907	PPI
Soga3	Tsc1	0.488907	PPI
Ncam2	Agap2	0.488907	PPI
Lrfn1	Dlg4	0.488907	PPI
Bag2	Nphp1	0.488907	PPI
Nptn	Agap2	0.488907	PPI
Tsc1	Lgi1	0.488907	PPI
Ank3	Agap2	0.488907	PPI
Ap2a2	Tnik	0.488907	PPI
Nptn	Huwe1	0.488907	PPI
Fxr1	Clip1	0.488907	PPI
Soga3	Huwe1	0.488907	PPI
Nyap2	Acot9	0.488907	PPI
Ncan	Tsc1	0.488907	PPI
Eif3e	Dcc	0.488907	PPI
Fxr1	Bub3	0.488907	PPI
Fxr1	Git2	0.488907	PPI
Sap18	Pias1	0.486477	PPI
Pias1	Sufu	0.486477	PPI
Myc	Brd8	0.484491	PPI
Myc	Trrap	0.484491	PPI
Max	Trrap	0.484491	PPI
Max	Brd8	0.484491	PPI
Max	Kat5	0.484491	PPI
Ing3	Dmap1	0.484491	PPI
Myc	Ep400	0.484491	PPI
Myc	Dmap1	0.484491	PPI
Phc1	Cbx7	0.484491	PPI
Max	Ep400	0.484491	PPI
Max	Dmap1	0.484491	PPI
Eif3a	Eif3k	0.484491	PPI
Eif3a	Eif3h	0.484491	PPI
Eif3a	Eif3i	0.484491	PPI
Trrap	Dmap1	0.484491	PPI
Eif3a	Eif3e	0.484491	PPI
Nck2	Efnb2	0.484491	PPI
Eif3a	Eif3f	0.484491	PPI
Eif3a	Eif3g	0.484491	PPI
Eif3a	Eif3c	0.484491	PPI
Nanog	Sall1	0.484491	PPI
Eif3d	Eif3a	0.484491	PPI
Gfi1b	Rcor1	0.484491	PPI
Csk	Cav1	0.484491	PPI
Csk	Cblb	0.484491	PPI
Irs1	Phb	0.484491	PPI
Trrap	Kat5	0.484491	PPI
Brd8	Dmap1	0.484491	PPI
Ggn	Oaz3	0.484165	PPI
Tra2a	Nol3	0.484165	PPI
Arf6	Tjap1	0.484165	PPI
Lrfn2	Dlg1	0.482882	PPI
Eif3f	Mtor	0.482882	PPI
Ubc	Ngly1	0.480668	PPI
Nr0b2	Hnf4g	0.480668	PPI
Maml1	Phf2	0.480668	PPI
Maml1	Tle6	0.480668	PPI
Kit	Matk	0.480668	PPI
Snai1	Nfe2	0.480668	PPI
Ncoa2	Nrip1	0.480668	PPI
Ncoa2	Mef2c	0.480668	PPI
Tead4	Wwtr1	0.480668	PPI
Isl2	Pygo1	0.480668	PPI
Isl2	Ssbp3	0.480668	PPI
Ssbp3	Tle6	0.480668	PPI
Ssbp3	Lhx9	0.480668	PPI
Pygo1	Lhx9	0.480668	PPI
Hunk	Nedd4	0.480668	PPI
Pin1	Ncor2	0.480668	PPI
Lmx1b	Ssbp2	0.480668	PPI
Kit	Fes	0.480668	PPI
Ubb	Nbr1	0.480668	PPI
Hnf1a	Hnf1b	0.480668	PPI
Gmeb2	Sp2	0.480668	PPI
Grm5	Actn1	0.480668	PPI
Isl2	Ssbp2	0.480668	PPI
Ssbp3	Hes6	0.480668	PPI
Erbb4	Magi2	0.480668	PPI
Csf1r	Stap1	0.480668	PPI
Tox3	Phf2	0.480668	PPI
Smad3	Magi2	0.480668	PPI
Nxf1	Map1a	0.480668	PPI
Nfe2	Chd4	0.480668	PPI
Nfe2	Plrg1	0.480668	PPI
Dbp	Hlf	0.480668	PPI
Nfe2	E4f1	0.480668	PPI
Nfe2	Ercc8	0.480668	PPI
Nfe2	Kdm4b	0.480668	PPI
Rnf41	Rtn4	0.480668	PPI
Mtf1	Nr4a3	0.480668	PPI
Nfe2	Kdm5d	0.480668	PPI
Pias2	Gtf2i	0.480668	PPI
Pias1	Gli2	0.480668	PPI
Ctbp1	Hdac9	0.480668	PPI
Jun	Smad3	0.480668	PPI
Tead4	Tbx21	0.480668	PPI
Hes6	Tef	0.480668	PPI
Ctbp1	Hdac2	0.480668	PPI
Kit	Plk1	0.480668	PPI
Kit	Sh2b1	0.480668	PPI
Msl1	Kat8	0.480668	PPI
Pcna	Polh	0.480668	PPI
Ssbp3	Rai14	0.480668	PPI
Egr1	Nab2	0.480668	PPI
Foxp1	Tle6	0.480668	PPI
Ppard	Bcl6	0.480668	PPI
Meis1	Pbx4	0.480668	PPI
Birc2	Glmn	0.480668	PPI
Tsn	Tsnax	0.480668	PPI
Kdm4c	Ssbp3	0.480668	PPI
Ube2w	Fancl	0.480668	PPI
Tirap	Tlr4	0.480668	PPI
Ptpra	Ptprm	0.480668	PPI
Lmx1b	Ssbp3	0.480668	PPI
Kit	Grb2	0.480668	PPI
Nfe2	Ash1l	0.480668	PPI
Mtf1	Rnf14	0.480668	PPI
Cebpg	Jdp2	0.480668	PPI
Foxp1	Smad4	0.480668	PPI
Sall4	Foxe3	0.480668	PPI
Rnps1	Foxe3	0.480668	PPI
Lmx1b	Ldb1	0.480668	PPI
Dlx5	Nfe2	0.480668	PPI
Dlx4	Sp7	0.480668	PPI
Jdp2	Pbx4	0.480668	PPI
Alx4	Dlx5	0.480668	PPI
Msx1	Tbp	0.480668	PPI
Tead2	Wwtr1	0.480668	PPI
Smad1	Zeb2	0.480668	PPI
Ldb1	Ssbp2	0.480668	PPI
Spi1	Gata1	0.480668	PPI
Enkur	Trpc2	0.480668	PPI
Ep300	Tle6	0.480668	PPI
Pbx3	Meis2	0.480668	PPI
Pbx2	Meis1	0.480668	PPI
Mycn	Hes6	0.480668	PPI
Socs1	Kit	0.480668	PPI
Nfkb1	Pias2	0.480668	PPI
Rxra	Nr1h3	0.480668	PPI
Tead1	Wwtr1	0.480668	PPI
Sox2	Pax6	0.480668	PPI
Lmo4	Ssbp2	0.480668	PPI
Jdp2	Dbp	0.480668	PPI
Bcl6	Bach2	0.480668	PPI
Smad2	Zeb2	0.480668	PPI
Ptprf	Ptpra	0.480668	PPI
Btg1	Cnot7	0.480668	PPI
Lmo4	Ldb1	0.480668	PPI
Dlx1	Sp7	0.480668	PPI
Batf	Junb	0.480668	PPI
Nr1i3	Ncor2	0.480668	PPI
Jund	Batf3	0.480668	PPI
Hfm1	Mlh1	0.480668	PPI
Six1	Dach1	0.480668	PPI
Alx4	Ldb1	0.480668	PPI
Pbx2	Meis2	0.480668	PPI
Per1	Tlx3	0.480668	PPI
Per1	Foxp1	0.480668	PPI
Dlx5	Jdp2	0.480668	PPI
Dlx5	Sp7	0.480668	PPI
Irak1	Irak4	0.480668	PPI
Tbp	Taf13	0.480668	PPI
Ssbp2	Pygo1	0.480668	PPI
Wwtr1	Tle6	0.480668	PPI
Dlx5	Hnf4g	0.480668	PPI
Alx4	Tbx21	0.480668	PPI
Alx4	Dlx1	0.480668	PPI
Dnmt1	Tox3	0.480668	PPI
Vdr	Smad3	0.480668	PPI
Vdr	Ncoa1	0.480668	PPI
Kdm5d	Zbtb9	0.480668	PPI
Alx4	Lmx1b	0.480668	PPI
Alx4	Sox2	0.480668	PPI
Alx4	Prrx1	0.480668	PPI
Alx4	Ercc8	0.480668	PPI
Alx4	Tle6	0.480668	PPI
Nfkb1	Nfkb2	0.480668	PPI
Sox2	Erg	0.480668	PPI
Hdac2	Hdac9	0.480668	PPI
Pbx1	Meis2	0.480668	PPI
Pbx3	Meis1	0.480668	PPI
Ldb1	Isl2	0.480668	PPI
Ldb1	Pygo1	0.480668	PPI
Ldb1	Lhx9	0.480668	PPI
Nr1i3	Nr0b2	0.480668	PPI
Socs1	Csf1r	0.480668	PPI
Nr1i3	Rxrg	0.480668	PPI
Nr1i3	Ncoa1	0.480668	PPI
Insr	Dok3	0.480668	PPI
Meox2	Rnf14	0.480668	PPI
Med16	Ssbp3	0.480668	PPI
Pwp1	Ssbp3	0.480668	PPI
Six1	Eya4	0.480668	PPI
Dlx1	Tbx21	0.480668	PPI
Kdm5c	Nfe2	0.480668	PPI
Tle1	Hes6	0.480668	PPI
[truncated: 5,297 more rows]

## Sheet: h. Mm. inter-layer edge table
source	target	Weight_1>2	Weight_2>3
Nacc2	Nacc2	0.00199712	0.00212966
Crocc	Crocc	0.00201024	0.0161895
Mx2	Mx2	0.0263665	0.00352269
Mff	Mff	0.001998	0.00989304
Papd5	Papd5	0.00199689	0.00325493
Rnf8	Rnf8	0.0020027	0.00201093
Nrf1	Nrf1	0.00200719	0.00379274
Mgst3	Mgst3	0.0471927	0.0608644
Cers2	Cers2	0.00591635	0.0464275
Grb2	Grb2	0.00199786	0.00251728
Snx5	Snx5	0.0022596	0.00856841
Cux1	Cux1	0.00827177	0.0173629
Dll3	Dll3	0.00202868	0.0567781
Sytl4	Sytl4	0.00202332	0.0733117
Zbp1	Zbp1	0.363204	0.012784
Sgsm2	Sgsm2	0.00199623	0.00661409
Myl4	Myl4	0.00201643	0.00383398
Plod3	Plod3	0.0112456	0.0253889
Mynn	Mynn	0.0020092	0.00267112
Wdfy2	Wdfy2	0.00200217	0.00203101
Taok1	Taok1	0.00419913	0.0045188
Haus7	Haus7	0.00201288	0.00653187
Acacb	Acacb	0.00309823	0.0219806
Cd79a	Cd79a	0.00200748	0.0102134
Aebp1	Aebp1	0.002002	0.0415948
Atf4	Atf4	0.00199693	0.00208565
Mtm1	Mtm1	0.00199846	0.0139464
Mogs	Mogs	0.00199697	0.00896337
Cenpp	Cenpp	0.00202523	0.0162977
Pak1	Pak1	0.00199715	0.00407422
Wiz	Wiz	0.00200292	0.00513044
Grm4	Grm4	0.00200358	0.00454954
Atg2b	Atg2b	0.00199758	0.00494316
Atn1	Atn1	0.00232744	0.00607069
Jmjd6	Jmjd6	0.00199755	0.00225779
Tram1	Tram1	0.00200274	0.00763833
Ptgis	Ptgis	0.00202091	0.0245845
Mtfp1	Mtfp1	0.00199736	0.00221396
Crkl	Crkl	0.00200023	0.00540495
Sall1	Sall1	0.00201053	0.0267865
Mei4	Mei4	0.00202981	0.00383138
Coa3	Coa3	0.00221979	0.0311706
Rbfa	Rbfa	0.00199631	0.00489471
Erp44	Erp44	0.00207356	0.00482822
Myom1	Myom1	0.00199737	0.0224631
Apc	Apc	0.00200285	0.0159201
P4ha1	P4ha1	0.00200036	0.0534705
Parp1	Parp1	0.00200177	0.00272883
Daam1	Daam1	0.00240537	0.00252155
E2f5	E2f5	0.00283422	0.00352407
Cul1	Cul1	0.00199735	0.00479276
Foxo3	Foxo3	0.00199745	0.00467026
Lama2	Lama2	0.00201398	0.0108882
Sik3	Sik3	0.00200427	0.00722794
Boc	Boc	0.0441532	0.0455105
Xbp1	Xbp1	0.00200202	0.00447688
Lgmn	Lgmn	0.0527404	0.0580199
Crym	Crym	0.0019963	0.0068145
Arap3	Arap3	0.00200665	0.00750914
Ppih	Ppih	0.00302774	0.00640266
Phb	Phb	0.00215434	0.00890098
Fen1	Fen1	0.00199835	0.00200656
Zc3h4	Zc3h4	0.00199739	0.00781614
Clu	Clu	0.00200075	0.00214608
Lipc	Lipc	0.00209361	0.0539637
Sugp1	Sugp1	0.00199802	0.00221522
Nom1	Nom1	0.00200196	0.002654
Apbb2	Apbb2	0.00200306	0.00208538
Ap1b1	Ap1b1	0.00199769	0.00514429
Fer	Fer	0.00200172	0.00263214
Lrch4	Lrch4	0.00199814	0.0333598
Med14	Med14	0.00235621	0.00562024
Satb2	Satb2	0.00203511	0.0127852
Mest	Mest	0.045284	0.0588562
Tiprl	Tiprl	0.00199802	0.00248424
Pygm	Pygm	0.00204059	0.00284561
Atrip	Atrip	0.00200028	0.0075713
Ube4a	Ube4a	0.00199751	0.00204939
Vat1l	Vat1l	0.00199959	0.0252248
Rbm8a	Rbm8a	0.00212873	0.020385
Mgll	Mgll	0.00199637	0.0022154
Mlec	Mlec	0.00199827	0.0184174
Jph2	Jph2	0.00199906	0.00649915
Cdk8	Cdk8	0.00199846	0.0219753
Top3a	Top3a	0.00201156	0.00693913
Trpc1	Trpc1	0.00200399	0.00200429
Palld	Palld	0.00425659	0.00448549
Smc6	Smc6	0.00200321	0.00242547
Mlf1	Mlf1	0.00202639	0.00717225
Mcmbp	Mcmbp	0.0019994	0.00278167
Zfp54	Zfp54	0.00201198	0.0020747
Kif1a	Kif1a	0.0104788	0.0191199
Fcho2	Fcho2	0.00200154	0.0241
Rnf43	Rnf43	0.00200299	0.00200243
Matn4	Matn4	0.0142219	0.00567635
Taf6	Taf6	0.00200157	0.00200425
E4f1	E4f1	0.00199632	0.0109858
Hcls1	Hcls1	0.00200011	0.0042617
Gnaz	Gnaz	0.00199908	0.0118985
Hcn3	Hcn3	0.00228931	0.00680273
Tlr4	Tlr4	0.00462692	0.00709828
Tlk2	Tlk2	0.00199917	0.00231889
Pdia5	Pdia5	0.00199881	0.00305382
Pcna	Pcna	0.00200081	0.00621479
Caap1	Caap1	0.00200933	0.00201354
Enah	Enah	0.00199715	0.00687711
Pogz	Pogz	0.00199624	0.0228065
Cbln4	Cbln4	0.00202895	0.00558316
Lmna	Lmna	0.00199958	0.00715911
Erc2	Erc2	0.00200208	0.00200565
Tppp	Tppp	0.00752402	0.0092651
Cpsf2	Cpsf2	0.00200152	0.00239914
Tcaf1	Tcaf1	0.00219127	0.00399562
Ypel2	Ypel2	0.00560711	0.005663
Alg3	Alg3	0.00539248	0.0245277
B9d1	B9d1	0.0020005	0.00327175
Gnaq	Gnaq	0.00334307	0.00395278
Fzr1	Fzr1	0.00199621	0.00214296
Cby1	Cby1	0.00200394	0.00201705
Per2	Per2	0.0178451	0.0724438
Sgcz	Sgcz	0.00199725	0.00297774
Hcfc1	Hcfc1	0.00434638	0.0155403
Trrap	Trrap	0.00216969	0.00375244
Fbxw5	Fbxw5	0.00199889	0.00246172
Stk4	Stk4	0.00199724	0.0075735
Clpb	Clpb	0.00253332	0.00256784
Hcn4	Hcn4	0.00200345	0.011039
Lamc1	Lamc1	0.00200727	0.00990021
Gan	Gan	0.00443448	0.00643825
Tcf20	Tcf20	0.00208552	0.0022204
Nudc	Nudc	0.00200054	0.00819636
Ddit3	Ddit3	0.00200667	0.00200789
Arl8b	Arl8b	0.00199623	0.00230408
Btc	Btc	0.00201788	0.00347783
Inf2	Inf2	0.0023564	0.00363579
Eid1	Eid1	0.0037991	0.00396431
Rnd3	Rnd3	0.00200483	0.0109477
Itih2	Itih2	0.00201705	0.00766809
Ipo9	Ipo9	0.00209482	0.00216281
Tgm1	Tgm1	0.00213313	0.127415
Thop1	Thop1	0.00199645	0.00451572
Med18	Med18	0.00199924	0.00482386
Rrp7a	Rrp7a	0.00199649	0.010132
Stim1	Stim1	0.00289998	0.00956472
S1pr2	S1pr2	0.002	0.00200137
Foxp2	Foxp2	0.00199988	0.0285306
Gak	Gak	0.00307669	0.00344734
Cd81	Cd81	0.00200108	0.00494973
Tmod3	Tmod3	0.00200085	0.00200822
Snx9	Snx9	0.00200009	0.00490534
Dido1	Dido1	0.00200163	0.00305092
Setd2	Setd2	0.00199683	0.00236426
Lsp1	Lsp1	0.00451504	0.0573369
Bop1	Bop1	0.00199907	0.00687817
Gnl3	Gnl3	0.00200605	0.0130749
Med11	Med11	0.00200505	0.00214848
Adk	Adk	0.00200172	0.00200541
Pcdh8	Pcdh8	0.00200102	0.00445029
Sp7	Sp7	0.00206843	0.0049329
Bbs7	Bbs7	0.00200006	0.00230626
Tmed2	Tmed2	0.002004	0.00281517
Srek1	Srek1	0.00200392	0.0202502
Rfc3	Rfc3	0.00241313	0.00302116
Myt1	Myt1	0.00323021	0.0024111
Peli2	Peli2	0.00446213	0.00670518
Pprc1	Pprc1	0.00200273	0.00398297
Flrt2	Flrt2	0.00200096	0.00294857
Cux2	Cux2	0.00201197	0.0103135
Ift52	Ift52	0.00225598	0.00426296
Nudt5	Nudt5	0.00199683	0.0112897
Med23	Med23	0.00200175	0.00203497
Anxa7	Anxa7	0.00199883	0.0020182
Nos2	Nos2	0.0119253	0.00340882
Ehmt2	Ehmt2	0.00200049	0.00345864
Hebp1	Hebp1	0.0178667	0.0198851
Traf3	Traf3	0.00199763	0.00287317
Tfam	Tfam	0.00199699	0.00213558
Nr1h2	Nr1h2	0.00362777	0.00383659
Lsm11	Lsm11	0.00199911	0.00585359
Rcn1	Rcn1	0.00200119	0.0158831
Stat3	Stat3	0.0055501	0.005574
Thoc7	Thoc7	0.00200326	0.00523285
Nr4a3	Nr4a3	0.00200897	0.014284
Ap2a2	Ap2a2	0.0024388	0.00385027
Stom	Stom	0.00370614	0.0281266
Mitf	Mitf	0.00747058	0.0110832
Gas2	Gas2	0.0020074	0.00202474
Palb2	Palb2	0.00201011	0.00537645
Cand2	Cand2	0.00348821	0.00711483
Kat5	Kat5	0.00200014	0.00206869
Faf1	Faf1	0.00199934	0.0034729
Tead3	Tead3	0.119309	0.147063
Hhip	Hhip	0.00201745	0.00213338
Rpa1	Rpa1	0.00199746	0.00224167
Rabl6	Rabl6	0.00200112	0.00363675
Sh2d5	Sh2d5	0.00200883	0.00501998
Pim3	Pim3	0.00934755	0.00948786
Scn9a	Scn9a	0.00578394	0.014462
Prkdc	Prkdc	0.00199892	0.00230946
Cenpm	Cenpm	0.0019994	0.003772
Ddx6	Ddx6	0.00199816	0.00199817
Mark4	Mark4	0.00213481	0.00270811
Hps5	Hps5	0.00199616	0.0124863
Spon1	Spon1	0.0365813	0.0830374
Atf1	Atf1	0.00200741	0.00202681
Caly	Caly	0.00296457	0.00319414
Hmgb1	Hmgb1	0.00199721	0.00887253
Tra2a	Tra2a	0.00200333	0.00863103
Hkdc1	Hkdc1	0.00202355	0.0141668
Rbl1	Rbl1	0.00201328	0.0124383
Ascc2	Ascc2	0.00199975	0.00238431
Preb	Preb	0.00199809	0.00200917
Cd2	Cd2	0.00205472	0.00207221
Pygo1	Pygo1	0.038906	0.0854501
Smyd2	Smyd2	0.00200236	0.0248914
Wdr74	Wdr74	0.0019981	0.00903229
Hip1r	Hip1r	0.00199764	0.00255076
Mov10	Mov10	0.0247459	0.0436763
P3h2	P3h2	0.00200029	0.00233198
Tead4	Tead4	0.00200945	0.0206194
Fxr1	Fxr1	0.00199971	0.00253854
Dgke	Dgke	0.00200283	0.00235508
Bag1	Bag1	0.00199896	0.00278829
Gopc	Gopc	0.00239589	0.00254062
Pi4kb	Pi4kb	0.00200042	0.00397253
Vamp4	Vamp4	0.00200048	0.00201251
Shc3	Shc3	0.00200781	0.00619836
Lmod3	Lmod3	0.00201925	0.00336907
Fosb	Fosb	0.0020343	0.00755153
Syn2	Syn2	0.00200089	0.00239228
Arl10	Arl10	0.00292126	0.00293318
Gosr1	Gosr1	0.00199715	0.00209299
Peli1	Peli1	0.00270024	0.00273501
Chd2	Chd2	0.00199798	0.0194964
Cntf	Cntf	0.0625859	0.0642529
Ddx47	Ddx47	0.00200241	0.00457658
Vrk2	Vrk2	0.00199761	0.00788027
Rtn2	Rtn2	0.00200186	0.00527699
Myh1	Myh1	0.453869	0.391363
Kdm1a	Kdm1a	0.00211575	0.00388495
Cdca5	Cdca5	0.00206917	0.142371
Brca2	Brca2	0.003329	0.0199559
Cdv3	Cdv3	0.00431374	0.00454734
Nampt	Nampt	0.00477424	0.00369945
Hook2	Hook2	0.00200358	0.0156992
Nod1	Nod1	0.00199903	0.00521326
Arf3	Arf3	0.00199667	0.00207826
Bccip	Bccip	0.00200176	0.00202978
Snx8	Snx8	0.00200423	0.00461671
Actn4	Actn4	0.00199685	0.00985607
Ccr1	Ccr1	0.0290019	0.138376
Dcaf8	Dcaf8	0.00200112	0.00201196
Hey1	Hey1	0.001998	0.00232429
Rbbp5	Rbbp5	0.00200356	0.00215551
Ubr2	Ubr2	0.00626453	0.044305
Eif2a	Eif2a	0.00199625	0.0020142
Arl15	Arl15	0.00199954	0.011783
Dffb	Dffb	0.00200953	0.00511996
Ldah	Ldah	0.00199918	0.00714665
Numb	Numb	0.00199974	0.00264883
Lypd1	Lypd1	0.00201454	0.0820274
Cdyl2	Cdyl2	0.00200196	0.00216174
Irf4	Irf4	0.00202796	0.0720945
Lman1	Lman1	0.00199651	0.00200112
Syce2	Syce2	0.00201845	0.00202596
Wdr70	Wdr70	0.00200272	0.0036322
Ltbp2	Ltbp2	0.165091	0.176935
Rogdi	Rogdi	0.00199833	0.00252205
Tfcp2	Tfcp2	0.00321983	0.0101064
Inhba	Inhba	0.00204301	0.0336559
Soga1	Soga1	0.00200441	0.00347463
Isl1	Isl1	0.00199618	0.00202068
Ninl	Ninl	0.00199924	0.00517206
Kcnq1	Kcnq1	0.00201114	0.0520758
Denr	Denr	0.00199635	0.00199668
Nek1	Nek1	0.00200117	0.00398009
Syne1	Syne1	0.00219725	0.0262609
Dlg2	Dlg2	0.00200091	0.0054938
Hells	Hells	0.0019998	0.00388203
Smu1	Smu1	0.00199919	0.00724684
Vdac2	Vdac2	0.00199738	0.0118225
Birc5	Birc5	0.0020059	0.0332269
Sar1b	Sar1b	0.00200131	0.0223317
Tsc1	Tsc1	0.00199771	0.00626107
Dgcr8	Dgcr8	0.0188134	0.0547382
Ifih1	Ifih1	0.127275	0.0240762
Nek8	Nek8	0.00200665	0.00328751
Cnn2	Cnn2	0.00200858	0.00624994
Plvap	Plvap	0.00311158	0.00316251
Rhob	Rhob	0.0105521	0.0115158
Bicd2	Bicd2	0.00199799	0.00967388
Hspb6	Hspb6	0.0564973	0.0619603
Myo16	Myo16	0.00201898	0.00351221
Evpl	Evpl	0.0020172	0.00698218
Hecw1	Hecw1	0.00199663	0.00200243
Srp68	Srp68	0.00199647	0.00207162
Ltbp3	Ltbp3	0.00199769	0.0226893
Taok2	Taok2	0.00285015	0.0033905
Ube2h	Ube2h	0.00200004	0.0020104
Set	Set	0.00199707	0.0106623
Mpp4	Mpp4	0.00200386	0.00667641
Maea	Maea	0.00200153	0.00427634
Sdhb	Sdhb	0.00200222	0.00301054
Dhx9	Dhx9	0.00210415	0.010568
Stk26	Stk26	0.00200113	0.00512093
Brsk2	Brsk2	0.00199785	0.00575608
U2af2	U2af2	0.00302127	0.00310208
Sfxn5	Sfxn5	0.00200236	0.00283491
Tdrd6	Tdrd6	0.00201815	0.00505629
Cdon	Cdon	0.00257718	0.00365427
Ttc8	Ttc8	0.00246946	0.00572657
C5ar2	C5ar2	0.00202618	0.0055062
Gli3	Gli3	0.00201961	0.00265061
Yipf4	Yipf4	0.00199846	0.00605242
Six1	Six1	0.00199765	0.00233651
Vegfc	Vegfc	0.00200629	0.00201224
Rin1	Rin1	0.00204042	0.00226901
Ascc3	Ascc3	0.00360282	0.00573777
Hnf1a	Hnf1a	0.00207112	0.00208264
Cstl1	Cstl1	0.0103427	0.0335801
Tesk1	Tesk1	0.00199782	0.00752777
Oaz3	Oaz3	0.00200165	0.00200473
Vti1b	Vti1b	0.00343703	0.00823788
Mlx	Mlx	0.00200477	0.00217062
Tigd4	Tigd4	0.00353494	0.0533121
Pax6	Pax6	0.00338904	0.0467285
Gna11	Gna11	0.00200021	0.00686719
Kcnq3	Kcnq3	0.00200408	0.00515262
Agfg1	Agfg1	0.00199848	0.0112178
Hnf1b	Hnf1b	0.00201173	0.00767317
Tex14	Tex14	0.00202407	0.0174186
Ube3a	Ube3a	0.00200071	0.0203308
Vapb	Vapb	0.0020847	0.00461844
Ctbp2	Ctbp2	0.00199801	0.0055329
Leng8	Leng8	0.00199752	0.0559848
Kat2b	Kat2b	0.00200146	0.00477072
Cbwd1	Cbwd1	0.00199651	0.00540609
Vps18	Vps18	0.00199815	0.00212154
Srsf2	Srsf2	0.0181815	0.0291629
Mob2	Mob2	0.00199684	0.00715853
Cdc73	Cdc73	0.00200896	0.0115871
Mcm2	Mcm2	0.00201186	0.00258676
Lrrk1	Lrrk1	0.00309922	0.0210021
Drd1	Drd1	0.00205561	0.0159356
Syt2	Syt2	0.00199679	0.00285676
Nrcam	Nrcam	0.00206236	0.00373238
Hfe	Hfe	0.00563371	0.0581091
Ppib	Ppib	0.00200135	0.0161022
Gsta3	Gsta3	0.00204389	0.00231164
Dse	Dse	0.00200418	0.0116201
Suz12	Suz12	0.00199883	0.00735684
Ift81	Ift81	0.00199783	0.00201499
Il2rb	Il2rb	0.00202406	0.00494105
Tfb2m	Tfb2m	0.002002	0.00207294
Stk24	Stk24	0.00345249	0.00390391
Tekt5	Tekt5	0.00672514	0.116153
Efna5	Efna5	0.00199746	0.00552881
Gnal	Gnal	0.00200064	0.00200473
Wdr76	Wdr76	0.0190193	0.056492
Clcn7	Clcn7	0.00200147	0.00275027
Armc8	Armc8	0.0019976	0.00218557
Cul4a	Cul4a	0.00200267	0.00230095
Adrb3	Adrb3	0.00203532	0.0384607
Hint2	Hint2	0.00200165	0.00200163
Opa3	Opa3	0.00200386	0.0144108
Noc4l	Noc4l	0.00200134	0.00789209
Tlr8	Tlr8	0.00201891	0.00655373
Ccng1	Ccng1	0.00199686	0.0266592
Stip1	Stip1	0.00312992	0.0206525
Rab14	Rab14	0.0019968	0.00260882
Wbp4	Wbp4	0.00200161	0.00431642
Psme4	Psme4	0.0144633	0.0144798
Lmx1b	Lmx1b	0.00205149	0.00934165
Il23a	Il23a	0.0364348	0.509036
Bud31	Bud31	0.00199781	0.00231339
Six5	Six5	0.00249504	0.044851
Tmco1	Tmco1	0.00199664	0.00262777
Ift20	Ift20	0.00218819	0.0168391
Kdm1b	Kdm1b	0.00199646	0.00201438
Hyou1	Hyou1	0.00199625	0.00219372
Pigs	Pigs	0.00199607	0.00889699
Sympk	Sympk	0.00199717	0.00263662
Ly9	Ly9	0.00201944	0.00866326
Ttc3	Ttc3	0.00307078	0.0038324
Otud4	Otud4	0.00217732	0.00245217
Wdr12	Wdr12	0.00200479	0.0104545
Gvin1	Gvin1	0.00305514	0.0317128
Eif3a	Eif3a	0.00204899	0.00206971
Cobl	Cobl	0.00200092	0.00632637
Whrn	Whrn	0.00341292	0.0131695
Ibtk	Ibtk	0.0365662	0.0646226
Pde4d	Pde4d	0.00200139	0.00213931
Ccng2	Ccng2	0.00200288	0.00347818
Pcbp1	Pcbp1	0.00200097	0.0167934
Fgf14	Fgf14	0.0020047	0.0226286
H13	H13	0.00199813	0.00266345
Grik4	Grik4	0.00200031	0.0068939
Mkln1	Mkln1	0.00199871	0.00243472
Ptpra	Ptpra	0.00199649	0.013118
Puf60	Puf60	0.00216086	0.0166325
Myo1d	Myo1d	0.00343045	0.0274215
Cgnl1	Cgnl1	0.00457432	0.00771538
Frrs1	Frrs1	0.00201978	0.0249999
Vps16	Vps16	0.00199645	0.00397781
Rrp1	Rrp1	0.00199616	0.00681424
Myh8	Myh8	0.00200227	0.0380011
Fahd1	Fahd1	0.00200555	0.00481823
Nr0b2	Nr0b2	0.0125922	0.0386716
Syt10	Syt10	0.00200754	0.00234204
Vdac1	Vdac1	0.00199846	0.00356991
Rad21	Rad21	0.0019996	0.00300361
Rnf17	Rnf17	0.00199861	0.00209303
Ackr3	Ackr3	0.00199892	0.00207676
Gpt	Gpt	0.00199828	0.0233077
Abi1	Abi1	0.00199643	0.00240781
Med21	Med21	0.00200283	0.0155243
Wdr61	Wdr61	0.00199623	0.00418465
Pias2	Pias2	0.00258224	0.0225742
Ctcfl	Ctcfl	0.00203933	0.00528941
Ercc6	Ercc6	0.00200496	0.00586248
Trio	Trio	0.00199625	0.00297232
Krt85	Krt85	0.00208785	0.0483708
Myo10	Myo10	0.0223684	0.028487
Spcs3	Spcs3	0.00200034	0.00724907
Pbx1	Pbx1	0.00199609	0.002154
Creg1	Creg1	0.00255512	0.00497828
Pura	Pura	0.00200173	0.0285097
Tra2b	Tra2b	0.00199793	0.00200647
Exog	Exog	0.00199748	0.00359303
Map1a	Map1a	0.00369541	0.0296552
Ext2	Ext2	0.00649013	0.00650335
Flot2	Flot2	0.00199737	0.00218628
Urgcp	Urgcp	0.00199633	0.00531677
Cmc1	Cmc1	0.00199672	0.00199666
Pak4	Pak4	0.00200041	0.00913042
Ddx21	Ddx21	0.00200716	0.00204293
Ugdh	Ugdh	0.00200327	0.00214363
Erap1	Erap1	0.0180321	0.00200788
Btg3	Btg3	0.0020203	0.0115871
Nrip1	Nrip1	0.00403989	0.0133972
Eif3k	Eif3k	0.002149	0.00244418
Flcn	Flcn	0.00200448	0.0242869
Etfa	Etfa	0.00328929	0.00419613
Erbb3	Erbb3	0.00199928	0.00201359
Lgi1	Lgi1	0.00199822	0.00213656
Otub1	Otub1	0.00199832	0.00253652
Fads2	Fads2	0.00199873	0.0447148
Poc5	Poc5	0.00199838	0.00316606
Kndc1	Kndc1	0.00254577	0.0268256
Nalcn	Nalcn	0.00199626	0.00296169
Aim2	Aim2	0.00200641	0.0528942
Cpt1b	Cpt1b	0.00203897	0.0135902
Lad1	Lad1	0.00200393	0.0123585
Rab6a	Rab6a	0.00200057	0.00410266
Nr1i3	Nr1i3	0.00200051	0.00448305
Lsm1	Lsm1	0.00201025	0.0217496
Rad17	Rad17	0.00200362	0.0175802
Use1	Use1	0.00437493	0.00445407
Eif1a	Eif1a	0.00295833	0.006162
Wbp11	Wbp11	0.00199766	0.00633902
Plek	Plek	0.0019996	0.0274332
Mypn	Mypn	0.0019987	0.00434282
Ppm1b	Ppm1b	0.00211952	0.00288411
Cisd3	Cisd3	0.00199682	0.0144647
Gfi1b	Gfi1b	0.00205347	0.103818
Srgn	Srgn	0.00201043	0.0292476
Brd4	Brd4	0.00199788	0.00216473
Kcnb2	Kcnb2	0.00200147	0.0551977
Epor	Epor	0.0020476	0.15312
Myh14	Myh14	0.00200333	0.013551
Fcrla	Fcrla	0.00522617	0.0171508
Tfdp1	Tfdp1	0.00200105	0.00592884
Slmap	Slmap	0.00200175	0.00590476
Sfrp4	Sfrp4	0.00341211	0.00906287
Fbxl2	Fbxl2	0.00200109	0.00286146
Rcl1	Rcl1	0.00200097	0.00432764
Myl6b	Myl6b	0.00200298	0.00303703
Hipk2	Hipk2	0.00201069	0.00339983
Pdpk1	Pdpk1	0.00200043	0.00258725
Stmn1	Stmn1	0.00446902	0.0378683
Cep63	Cep63	0.00200575	0.00714903
Noxo1	Noxo1	0.00201581	0.00626796
Gpr18	Gpr18	0.00203894	0.00395392
Sept6	Sept6	0.00199778	0.00208227
Kif17	Kif17	0.00570586	0.0146797
Pbx2	Pbx2	0.00199953	0.00281553
Cfdp1	Cfdp1	0.00223229	0.00265868
Osgep	Osgep	0.00564983	0.0263785
Il34	Il34	0.0191334	0.0191335
Grk5	Grk5	0.00200438	0.0106394
Atp5l	Atp5l	0.057114	0.077176
Mknk1	Mknk1	0.00199666	0.0133861
Isy1	Isy1	0.00200735	0.00200796
Cd244	Cd244	0.00205878	0.0237709
Toe1	Toe1	0.00199668	0.00358682
Palm	Palm	0.00199753	0.00238621
Prdx2	Prdx2	0.00199836	0.00925036
Pxdn	Pxdn	0.00200328	0.00211875
Pdcd2	Pdcd2	0.00200566	0.00436409
Sytl5	Sytl5	0.00200084	0.00200153
Gse1	Gse1	0.00199993	0.0229563
Timd4	Timd4	0.022189	0.279673
Tox4	Tox4	0.00200178	0.00200169
Brd3	Brd3	0.0019969	0.00699048
Chd4	Chd4	0.00358696	0.00389411
Cul5	Cul5	0.00417983	0.00436116
Gsta4	Gsta4	0.00200519	0.00205338
Tbcb	Tbcb	0.00268654	0.00858028
Cyld	Cyld	0.00199939	0.00200357
Socs5	Socs5	0.00199717	0.0022853
Nod2	Nod2	0.00737533	0.0121952
Mcm4	Mcm4	0.00274951	0.00437793
Wdr35	Wdr35	0.0019964	0.00225988
Ubr5	Ubr5	0.00655258	0.0271266
Rgs7	Rgs7	0.0025	0.00290409
Akip1	Akip1	0.0019981	0.00676264
Traf6	Traf6	0.00199826	0.00354492
Nop14	Nop14	0.00200439	0.0104879
Rab4b	Rab4b	0.00199746	0.00359245
Sash1	Sash1	0.027514	0.0272318
Artn	Artn	0.00206281	0.0814444
Fubp1	Fubp1	0.00263716	0.00692597
Pidd1	Pidd1	0.00255171	0.00685653
Rasa2	Rasa2	0.00200131	0.0162536
Zfp27	Zfp27	0.00199979	0.00238576
Nexn	Nexn	0.00200825	0.0020439
Fmn1	Fmn1	0.0023473	0.00237632
Cntn2	Cntn2	0.00200071	0.00852115
Zw10	Zw10	0.00200892	0.00233824
Tgfb1	Tgfb1	0.0020063	0.0141733
Sos1	Sos1	0.00253169	0.00648546
Dok3	Dok3	0.00201121	0.0164411
Ifit1	Ifit1	0.547824	0.307164
Hdac5	Hdac5	0.00531636	0.00542234
Traf5	Traf5	0.00201994	0.00394054
Itpr3	Itpr3	0.0020002	0.00235023
E2f1	E2f1	0.00199894	0.0110181
Mecp2	Mecp2	0.00254909	0.00340774
Ivd	Ivd	0.00200184	0.0144677
Uaca	Uaca	0.00200164	0.0092131
Ocln	Ocln	0.00199991	0.00429665
Pum2	Pum2	0.00199626	0.00239911
Xpo1	Xpo1	0.0020033	0.00331963
Cbln1	Cbln1	0.00455032	0.0279722
Nol6	Nol6	0.00199722	0.00404806
Scn8a	Scn8a	0.00200348	0.0186315
Pelo	Pelo	0.00200235	0.0197801
Bpnt1	Bpnt1	0.00200063	0.0180292
Grsf1	Grsf1	0.00199832	0.00911463
Brd7	Brd7	0.00199853	0.00283787
Spta1	Spta1	0.00202885	0.161582
Hbs1l	Hbs1l	0.00199831	0.00477187
Trpc4	Trpc4	0.00200357	0.00342305
Ap1s1	Ap1s1	0.00199901	0.00241232
Dpp4	Dpp4	0.00200265	0.0969777
Tle1	Tle1	0.00225672	0.00267929
Myh9	Myh9	0.00453089	0.0125538
Wdr6	Wdr6	0.0040344	0.0124825
Cys1	Cys1	0.0281182	0.0585322
Spin1	Spin1	0.00199672	0.00360099
Sae1	Sae1	0.00388693	0.00610093
Prps2	Prps2	0.00199823	0.00507881
Ccar2	Ccar2	0.00199787	0.00969791
Rrp8	Rrp8	0.00199698	0.0175309
Ecm1	Ecm1	0.00272896	0.00428223
Kifc1	Kifc1	0.00203817	0.0143671
Ptgr1	Ptgr1	0.00200951	0.00244957
Card9	Card9	0.00200822	0.157553
Dlk1	Dlk1	0.0522486	0.0614883
Coil	Coil	0.00219897	0.00230621
Dzip1	Dzip1	0.00199844	0.0190441
Eif2d	Eif2d	0.00200278	0.00214439
Tnnc2	Tnnc2	0.00210255	0.0120308
Vamp3	Vamp3	0.00200343	0.0204864
Tlr3	Tlr3	0.00285163	0.005691
Nol11	Nol11	0.00199918	0.00200217
Mcat	Mcat	0.00258143	0.00915511
Cbx5	Cbx5	0.00200031	0.0020243
Clock	Clock	0.00407149	0.00849731
Ncoa1	Ncoa1	0.00674362	0.0134363
Adpgk	Adpgk	0.0029074	0.00528694
Lifr	Lifr	0.0112533	0.0166174
Itk	Itk	0.00202692	0.002553
Pcp2	Pcp2	0.00253694	0.00372963
Med30	Med30	0.002	0.00442289
Pkp1	Pkp1	0.00199932	0.00209597
Imp4	Imp4	0.00200624	0.00477396
Fem1b	Fem1b	0.00199662	0.0019977
Scn5a	Scn5a	0.00200432	0.0314816
Nbl1	Nbl1	0.00199633	0.00524465
Anks3	Anks3	0.00199967	0.00350405
Ssh3	Ssh3	0.00200623	0.047747
Clip1	Clip1	0.00200271	0.00220396
Trem3	Trem3	0.00331115	0.12263
Rit1	Rit1	0.00199842	0.0192831
Gps2	Gps2	0.00199982	0.00449051
Arf4	Arf4	0.00201606	0.0214468
Tspo	Tspo	0.00199852	0.004652
Mcm5	Mcm5	0.00199834	0.0175213
Macf1	Macf1	0.00200133	0.015609
Actn2	Actn2	0.00768814	0.0165814
Xpo5	Xpo5	0.00200043	0.00269368
Crk	Crk	0.00199708	0.00534478
Nxn	Nxn	0.013039	0.0131788
Lrig1	Lrig1	0.001999	0.00285885
Dmwd	Dmwd	0.00200199	0.00200731
Atm	Atm	0.00264216	0.0109698
Rap2a	Rap2a	0.0019973	0.0141159
Eya2	Eya2	0.00200915	0.0453022
Dcaf5	Dcaf5	0.00199957	0.00282156
Ephb2	Ephb2	0.00200849	0.00486191
Orc4	Orc4	0.0031763	0.00361682
Ube2b	Ube2b	0.00199876	0.00210429
Spag4	Spag4	0.00199752	0.00240011
Ylpm1	Ylpm1	0.00308616	0.032973
Lpar1	Lpar1	0.00948805	0.0110724
Hmgcl	Hmgcl	0.00199817	0.00201482
Rbbp7	Rbbp7	0.00209149	0.00218731
Gab2	Gab2	0.00200079	0.00226439
Rer1	Rer1	0.00199938	0.015187
Tmf1	Tmf1	0.00199653	0.00199688
Rgl2	Rgl2	0.00200032	0.0228809
Rbm10	Rbm10	0.00200408	0.00235966
Ckap5	Ckap5	0.0023251	0.01308
Rem2	Rem2	0.012178	0.0143378
Fgf22	Fgf22	0.00693417	0.0284341
Ttf2	Ttf2	0.00200011	0.00201752
Asb15	Asb15	0.00206151	0.0309174
Arrb2	Arrb2	0.00200337	0.00261949
Xiap	Xiap	0.00199713	0.00212687
Bmp7	Bmp7	0.00200951	0.00206943
Mark3	Mark3	0.00302729	0.00419368
Lair1	Lair1	0.00199768	0.026484
Hacd2	Hacd2	0.00272249	0.00303902
Nkd1	Nkd1	0.0127143	0.036284
Rufy1	Rufy1	0.00200097	0.011696
Bzw2	Bzw2	0.00199669	0.00586291
Nlrx1	Nlrx1	0.00200526	0.00387476
Mpp6	Mpp6	0.00199956	0.00252886
Abcd3	Abcd3	0.00199914	0.00480979
Aldoc	Aldoc	0.00199859	0.002211
Ilf2	Ilf2	0.00199672	0.0027721
Arl2	Arl2	0.00199698	0.00204362
Ccdc6	Ccdc6	0.0048805	0.00539586
Hsf1	Hsf1	0.00243238	0.0046704
Rbpms	Rbpms	0.00315694	0.00950632
Robo4	Robo4	0.00200411	0.00457879
Nktr	Nktr	0.00199704	0.0284034
Fzd5	Fzd5	0.0020085	0.0171057
Rnf25	Rnf25	0.00199648	0.00284882
Fgf1	Fgf1	0.00208748	0.00215738
Otud5	Otud5	0.00199968	0.00199955
Rab37	Rab37	0.00199785	0.00644733
Porcn	Porcn	0.00199919	0.00634744
Lrrc4	Lrrc4	0.00200552	0.0454768
Pkp4	Pkp4	0.00200236	0.0029965
Twf2	Twf2	0.0019965	0.0217076
Taf6l	Taf6l	0.00200482	0.00271892
Nubpl	Nubpl	0.00200299	0.00290786
Nono	Nono	0.00199901	0.00266582
Dand5	Dand5	0.00200261	0.00258468
Utp6	Utp6	0.00200328	0.00381581
Nr2c1	Nr2c1	0.00200182	0.0140581
Cxxc1	Cxxc1	0.00200429	0.0112364
Hdac1	Hdac1	0.00199639	0.00203233
Omp	Omp	0.00201463	0.0232646
Cers4	Cers4	0.00200065	0.00232914
Pds5b	Pds5b	0.00327701	0.00810025
Dus2	Dus2	0.0020095	0.00971748
Atg2a	Atg2a	0.00477089	0.00492468
Cmya5	Cmya5	0.00201531	0.002806
Wsb1	Wsb1	0.0020098	0.0388812
Mink1	Mink1	0.0020012	0.00200876
Rala	Rala	0.00199766	0.00398706
Hibch	Hibch	0.00199848	0.00462284
Krr1	Krr1	0.00200199	0.00209066
Brd2	Brd2	0.0019984	0.00452577
Pex5	Pex5	0.00199924	0.00201304
Dscam	Dscam	0.00199885	0.00239201
Irak1	Irak1	0.00200268	0.00208285
Nbea	Nbea	0.00215256	0.00644785
Pkd1	Pkd1	0.00305047	0.0285726
Ncald	Ncald	0.00257725	0.0109625
Cd52	Cd52	0.0182599	0.165197
Mtap	Mtap	0.00200472	0.00200576
Ago1	Ago1	0.00200446	0.00238275
Ddx3y	Ddx3y	0.001999	0.00311838
Phf20	Phf20	0.00199946	0.00339834
Drd3	Drd3	0.00203852	0.0160689
Ap2b1	Ap2b1	0.00199881	0.00476128
Stmn3	Stmn3	0.00199817	0.00480994
Chd7	Chd7	0.00229594	0.0278806
Optn	Optn	0.00497342	0.015919
Lrrc2	Lrrc2	0.00201152	0.00391202
Stat1	Stat1	0.198226	0.00487729
Agk	Agk	0.00263511	0.00264505
Tchp	Tchp	0.00200225	0.0100163
Nfe2	Nfe2	0.00201569	0.0723984
Fkbp5	Fkbp5	0.105377	0.115
Atl2	Atl2	0.00199723	0.00232248
Mlf2	Mlf2	0.00199976	0.00242289
Wwc2	Wwc2	0.00199754	0.0179325
Ngf	Ngf	0.00320546	0.0525258
Fign	Fign	0.00200625	0.00648636
Cdk4	Cdk4	0.00218609	0.034769
Nup43	Nup43	0.00358276	0.0578999
Ldlr	Ldlr	0.00989988	0.00990113
Sun3	Sun3	0.00206377	0.016113
Ppil2	Ppil2	0.00223793	0.00384963
Myo7a	Myo7a	0.00444022	0.0045299
Casp8	Casp8	0.00200908	0.0212089
Cbr3	Cbr3	0.029369	0.0212075
Cbx2	Cbx2	0.00199671	0.00218331
Tie1	Tie1	0.00200173	0.0062138
Ndel1	Ndel1	0.0019995	0.00204612
Larp4	Larp4	0.00199892	0.0056346
Acsf2	Acsf2	0.002418	0.00291763
Riok1	Riok1	0.00201287	0.00317973
Uvrag	Uvrag	0.00199995	0.00421978
Pdia4	Pdia4	0.0021459	0.0247141
Dph1	Dph1	0.00200361	0.0047476
Efs	Efs	0.00200671	0.00989135
Sec63	Sec63	0.00199739	0.0025302
Cnpy4	Cnpy4	0.00200297	0.0146111
Gpx4	Gpx4	0.00237048	0.0147414
Aak1	Aak1	0.00199696	0.0122218
Rbak	Rbak	0.00200773	0.0120372
Xpo7	Xpo7	0.00199674	0.00396858
Mbd4	Mbd4	0.00233057	0.021175
Rcn3	Rcn3	0.00298573	0.00802686
Ethe1	Ethe1	0.00223093	0.00944
Grm5	Grm5	0.00203468	0.00830722
Eif3c	Eif3c	0.00199622	0.00658611
Hax1	Hax1	0.00200337	0.00268709
Ier5	Ier5	0.0024853	0.00414763
Brca1	Brca1	0.00199606	0.00230209
Tpm2	Tpm2	0.00750223	0.0139175
Ldb1	Ldb1	0.00200153	0.0109974
Pcm1	Pcm1	0.00199828	0.011322
Mfn1	Mfn1	0.00199741	0.0151635
Cnot4	Cnot4	0.00200153	0.00938201
Adck1	Adck1	0.00216275	0.0107214
Nadk	Nadk	0.0021054	0.00254486
Rpa2	Rpa2	0.0020036	0.0315045
Bcl2	Bcl2	0.00199949	0.00372351
Tlr1	Tlr1	0.00200121	0.0218109
Wdr81	Wdr81	0.00200522	0.0189521
Hspb2	Hspb2	0.00200635	0.00400657
Sytl1	Sytl1	0.00203014	0.00288757
Fkbp4	Fkbp4	0.00199876	0.0210548
U2af1	U2af1	0.0192172	0.0229814
Zwint	Zwint	0.00199812	0.00199977
Mib2	Mib2	0.002411	0.0026918
Irf7	Irf7	0.380429	0.0412155
Wdr1	Wdr1	0.00200137	0.0175933
Cspg4	Cspg4	0.0245923	0.026209
Akap2	Akap2	0.00200113	0.0103234
Mef2d	Mef2d	0.0020012	0.00200574
Rap2c	Rap2c	0.0034066	0.00695556
Zfhx2	Zfhx2	0.00200401	0.00329413
Wdr37	Wdr37	0.0112324	0.0119925
Zbtb3	Zbtb3	0.00202315	0.0471221
Snai1	Snai1	0.00266048	0.0461308
Fez1	Fez1	0.00199667	0.00798995
Cox5a	Cox5a	0.00520484	0.00938131
Cep97	Cep97	0.00200277	0.00607905
Bach1	Bach1	0.00199865	0.00329944
Txlnb	Txlnb	0.0309318	0.0817144
Dbp	Dbp	0.00200146	0.0148025
Senp3	Senp3	0.00200203	0.00278313
Gmfb	Gmfb	0.00200061	0.00828462
Snd1	Snd1	0.0019978	0.00217894
Ssh1	Ssh1	0.00200152	0.00230949
Dtnb	Dtnb	0.00199814	0.00514915
Gpr37	Gpr37	0.00269229	0.00978491
Msx1	Msx1	0.00202548	0.0101091
Bin2	Bin2	0.133953	0.253234
Esyt1	Esyt1	0.00579938	0.00595621
Coq6	Coq6	0.00200117	0.00235371
Azi2	Azi2	0.00200123	0.00321439
Rrp12	Rrp12	0.00741397	0.00745347
Ciao1	Ciao1	0.00199682	0.00359322
Ttf1	Ttf1	0.00244998	0.00206522
Atad2	Atad2	0.00200448	0.00200738
Cnot6	Cnot6	0.00199914	0.00916272
Bin1	Bin1	0.00199669	0.00226153
Kif9	Kif9	0.00199926	0.00235135
Scmh1	Scmh1	0.00199991	0.0082871
Plcb1	Plcb1	0.00636579	0.00637658
Xrcc1	Xrcc1	0.00200496	0.00421364
Creb3	Creb3	0.00199963	0.00348299
Hvcn1	Hvcn1	0.00200422	0.0253489
Wdr5	Wdr5	0.00199879	0.0140585
Nedd4	Nedd4	0.00199709	0.00202259
Rbm4b	Rbm4b	0.0020077	0.0139093
Rims3	Rims3	0.00309941	0.00322168
Prrx2	Prrx2	0.00202978	0.00220092
Csf1	Csf1	0.0191048	0.0711277
Smap1	Smap1	0.00199905	0.00495524
Sf3b6	Sf3b6	0.00200438	0.0104902
Ykt6	Ykt6	0.00199917	0.00278175
Atp5j	Atp5j	0.00199801	0.00294077
Cd33	Cd33	0.00201458	0.0122499
Pde6d	Pde6d	0.00200269	0.0121144
Wdr75	Wdr75	0.00199622	0.00315876
Pld6	Pld6	0.00201964	0.0023998
Gcfc2	Gcfc2	0.00318366	0.00331401
Csdc2	Csdc2	0.00199669	0.00264754
Sept1	Sept1	0.00199721	0.00459451
Slk	Slk	0.00464822	0.0106096
Kif5a	Kif5a	0.00211332	0.022973
Mafg	Mafg	0.00199633	0.00415122
Nfx1	Nfx1	0.00200086	0.0141468
Itpr1	Itpr1	0.00199795	0.00201564
Dctn4	Dctn4	0.00199897	0.00227362
Gipc1	Gipc1	0.00200053	0.00200416
Rab36	Rab36	0.0020034	0.00231272
Tef	Tef	0.00328207	0.0272343
Ano10	Ano10	0.0020009	0.0102171
Vps29	Vps29	0.0019985	0.00216804
Sox17	Sox17	0.00200884	0.020158
Tbce	Tbce	0.00200273	0.00488863
Sdc1	Sdc1	0.0126907	0.0105913
Lacc1	Lacc1	0.00199857	0.00247329
Rab28	Rab28	0.00199941	0.00277482
Snx2	Snx2	0.00200227	0.00644597
Vps28	Vps28	0.00199758	0.00925116
Smc2	Smc2	0.00200664	0.00222587
Ptprm	Ptprm	0.00199657	0.00208876
L1cam	L1cam	0.00337242	0.0360635
Pard3	Pard3	0.00419347	0.0054125
Nlgn2	Nlgn2	0.00609865	0.00616704
Akap3	Akap3	0.00204056	0.00507532
Ssh2	Ssh2	0.00200588	0.0064425
Grap2	Grap2	0.00200243	0.0473936
Ino80	Ino80	0.00199948	0.00213356
Stk10	Stk10	0.00200155	0.0138575
Cirbp	Cirbp	0.00199659	0.0171973
Ndrg1	Ndrg1	0.00200124	0.0202845
Pspc1	Pspc1	0.00199659	0.00272297
Rdh11	Rdh11	0.0020048	0.00406863
Mier2	Mier2	0.00200216	0.00206345
Haus1	Haus1	0.00385704	0.00410704
Mtx2	Mtx2	0.00200058	0.00204028
Phf14	Phf14	0.00199889	0.00304996
Dnd1	Dnd1	0.00204353	0.00398777
Chfr	Chfr	0.00272558	0.0322521
Hdac4	Hdac4	0.00200297	0.00266482
Kdm5c	Kdm5c	0.00199918	0.00246757
Ckap4	Ckap4	0.00199934	0.0115713
Snx1	Snx1	0.010349	0.0166508
Top2a	Top2a	0.00204908	0.0444909
Amer2	Amer2	0.00199903	0.00207436
Ptbp2	Ptbp2	0.00199885	0.00250696
Ncoa3	Ncoa3	0.0020054	0.0159897
Dock8	Dock8	0.00200519	0.00940783
Mdc1	Mdc1	0.00199702	0.0358982
Tob2	Tob2	0.00200544	0.0165531
Rock2	Rock2	0.00199837	0.00276503
Cndp2	Cndp2	0.00200263	0.00346696
Sv2a	Sv2a	0.00200017	0.00673344
Syt1	Syt1	0.00200219	0.00200727
Calu	Calu	0.00257236	0.0125097
Wnt7b	Wnt7b	0.015666	0.0222521
Ephb4	Ephb4	0.00200833	0.00288437
Wdr33	Wdr33	0.00199733	0.00319882
Prrt1	Prrt1	0.00199897	0.00420527
Kmt2c	Kmt2c	0.00200764	0.00977372
Rem1	Rem1	0.00201013	0.00205563
Dtx3l	Dtx3l	0.0676292	0.0051
Lman2	Lman2	0.0020016	0.0199253
Dock1	Dock1	0.00199698	0.00294178
Ubn1	Ubn1	0.00199892	0.00200584
Peli3	Peli3	0.0019993	0.00775707
Vac14	Vac14	0.00200349	0.00273137
Aldh2	Aldh2	0.00199779	0.00202238
Adcy8	Adcy8	0.00276299	0.0104598
Hipk3	Hipk3	0.00199931	0.0165795
Sumo3	Sumo3	0.00200038	0.00361456
Kdm4a	Kdm4a	0.00200224	0.00523288
Pkn1	Pkn1	0.00200281	0.0104431
Fbxl7	Fbxl7	0.00200916	0.014023
Ddx42	Ddx42	0.0019994	0.0131971
Runx1	Runx1	0.0019961	0.00323106
Oas3	Oas3	0.221636	0.105989
Aurka	Aurka	0.00201713	0.0196617
Cwc25	Cwc25	0.00200282	0.0132768
Medag	Medag	0.0020013	0.0173994
Trpc2	Trpc2	0.002006	0.0465718
Ganab	Ganab	0.00199616	0.00469255
Sept3	Sept3	0.00199804	0.00365328
Ddx50	Ddx50	0.0019981	0.00327241
Fto	Fto	0.00199983	0.00409687
Bbs4	Bbs4	0.0026011	0.00498363
Gga1	Gga1	0.00199723	0.00506871
Rcor1	Rcor1	0.00200351	0.00203392
Dll1	Dll1	0.00201098	0.0020172
Lsm2	Lsm2	0.00200296	0.00286208
Atg12	Atg12	0.00199675	0.00842752
Casp4	Casp4	0.00491227	0.021139
Tkt	Tkt	0.00199927	0.00701544
Asxl2	Asxl2	0.00200824	0.0279775
Wdr91	Wdr91	0.00199911	0.00383603
Ttc5	Ttc5	0.00199859	0.0054163
Nrp1	Nrp1	0.00200237	0.00223585
Socs1	Socs1	0.0207833	0.00335694
Pax2	Pax2	0.00200145	0.0154728
Cdyl	Cdyl	0.00247337	0.00282119
Leo1	Leo1	0.00200365	0.00970087
Shoc2	Shoc2	0.00199761	0.00884532
Hfm1	Hfm1	0.00349366	0.076381
Rcor2	Rcor2	0.00200905	0.0142923
Dact2	Dact2	0.00200515	0.00905421
Ercc8	Ercc8	0.00201301	0.00452985
Mprip	Mprip	0.00216552	0.00345387
Tnpo1	Tnpo1	0.00212876	0.00228641
E2f6	E2f6	0.0019974	0.0093636
Ap2m1	Ap2m1	0.00199854	0.00296033
Pigf	Pigf	0.00199846	0.00309043
Dok1	Dok1	0.00200373	0.00536219
Strap	Strap	0.00199931	0.00678806
Ndrg2	Ndrg2	0.00630047	0.00605805
Pld1	Pld1	0.00200025	0.00200285
Nfu1	Nfu1	0.00661135	0.0132619
Klf9	Klf9	0.0246332	0.0246768
Lbr	Lbr	0.00200897	0.00693253
Cdc5l	Cdc5l	0.00200227	0.00383725
Rgs12	Rgs12	0.0022638	0.0022669
Epha1	Epha1	0.00338896	0.00903147
Vps25	Vps25	0.00200237	0.0196097
Tox	Tox	0.00201974	0.0107723
Nr1h3	Nr1h3	0.00201348	0.0143163
Rfc5	Rfc5	0.00201026	0.0087699
Mbtd1	Mbtd1	0.00199958	0.00653244
Anxa6	Anxa6	0.0020736	0.00217187
Naa25	Naa25	0.00199962	0.00476813
Vwa8	Vwa8	0.00199678	0.00520661
Grm7	Grm7	0.00200022	0.00303162
Ube2s	Ube2s	0.00200145	0.00242658
Mpp3	Mpp3	0.00200711	0.00261768
Khnyn	Khnyn	0.00200342	0.00212308
Rpf1	Rpf1	0.00379727	0.00400688
Akap1	Akap1	0.00200237	0.0100221
Adcy3	Adcy3	0.00199872	0.00845663
Asf1b	Asf1b	0.00204212	0.0105523
Wnk4	Wnk4	0.0651077	0.11261
Ttc23	Ttc23	0.00219192	0.00417821
Ddc	Ddc	0.00201353	0.00201386
Lamc3	Lamc3	0.00200312	0.0048383
Ebpl	Ebpl	0.0020001	0.00215595
Cdc20	Cdc20	0.00203343	0.00494827
Ppid	Ppid	0.00199893	0.0169399
Dph6	Dph6	0.00199792	0.00251156
Hpca	Hpca	0.00420561	0.00520373
Tia1	Tia1	0.00200377	0.0249962
Tlr7	Tlr7	0.00203132	0.00221756
Lrp5	Lrp5	0.00200548	0.00916034
Gpr17	Gpr17	0.00201104	0.00266948
Fnip1	Fnip1	0.00210238	0.0245764
Pcbp3	Pcbp3	0.00200045	0.00206736
Rtn1	Rtn1	0.00200062	0.00216737
Elf2	Elf2	0.00199652	0.00201845
Ipo5	Ipo5	0.00200095	0.00203185
Gpsm2	Gpsm2	0.00199881	0.00199947
Esr2	Esr2	0.0020113	0.00454535
Cd79b	Cd79b	0.00204245	0.0128044
Brpf1	Brpf1	0.00199746	0.00208147
Cd1d1	Cd1d1	0.00201569	0.0024766
Stat6	Stat6	0.00200044	0.00227312
Dapk1	Dapk1	0.001998	0.00369105
Yif1a	Yif1a	0.00200117	0.0193011
Fmnl1	Fmnl1	0.00200252	0.00312936
Umps	Umps	0.00199951	0.00556043
Rabl3	Rabl3	0.00199648	0.00241893
Srf	Srf	0.00200265	0.00587005
Atg3	Atg3	0.00200007	0.00203823
Lyz2	Lyz2	0.00419672	0.0323445
Cblc	Cblc	0.00202976	0.00349531
Tjap1	Tjap1	0.00211908	0.0249226
Rbl2	Rbl2	0.0019972	0.00204632
Pdk2	Pdk2	0.00200011	0.00200003
Dmxl1	Dmxl1	0.00199871	0.00824903
Clic4	Clic4	0.00292971	0.00973997
Ptgr2	Ptgr2	0.0047144	0.00492924
Gtf2i	Gtf2i	0.00216494	0.00401716
Kdm6a	Kdm6a	0.0020019	0.0030208
Kif5c	Kif5c	0.00199922	0.00203428
Trib2	Trib2	0.012195	0.0148
Amot	Amot	0.00200601	0.00298587
Dda1	Dda1	0.00200199	0.00292428
Fads3	Fads3	0.00200203	0.00435846
Irs2	Irs2	0.00200611	0.00381192
Synj1	Synj1	0.00199829	0.0107189
Efr3b	Efr3b	0.00200145	0.00392969
Becn1	Becn1	0.00231706	0.00658061
Ube2a	Ube2a	0.00200349	0.0133329
Ptprk	Ptprk	0.00200098	0.0110409
Rp9	Rp9	0.00199672	0.0176076
Bbs1	Bbs1	0.00200417	0.00379263
Aip	Aip	0.00200244	0.00896342
Zfp28	Zfp28	0.00201416	0.0535724
Klf3	Klf3	0.00200924	0.0020095
Lima1	Lima1	0.00467577	0.00563307
Rpn1	Rpn1	0.00220812	0.011847
Phtf1	Phtf1	0.00199873	0.00210142
Cog8	Cog8	0.00200072	0.00515713
Gorab	Gorab	0.00199959	0.0440345
Syn3	Syn3	0.00251662	0.0152905
Fancg	Fancg	0.00199895	0.00235499
Sntg1	Sntg1	0.00200401	0.00473299
Foxc1	Foxc1	0.00200854	0.0578457
Rhno1	Rhno1	0.00199868	0.0103032
Abcg2	Abcg2	0.00705666	0.0164214
Pcgf3	Pcgf3	0.00199907	0.00445529
Ubc	Ubc	0.00472444	0.02014
Wnt9a	Wnt9a	0.00200099	0.00242455
Cenpa	Cenpa	0.00201901	0.0911282
Rnd2	Rnd2	0.0020089	0.00202263
Nop56	Nop56	0.00334439	0.00334604
Fmr1	Fmr1	0.00199828	0.00200114
Mthfs	Mthfs	0.00202754	0.0115423
Thoc6	Thoc6	0.0020002	0.00966893
Brap	Brap	0.00322071	0.00393844
Pclo	Pclo	0.00200288	0.00565065
Mlc1	Mlc1	0.00217615	0.0136711
Wdr55	Wdr55	0.00199836	0.00709445
Ercc3	Ercc3	0.00199824	0.00242628
Desi1	Desi1	0.00200038	0.00225321
Zfp69	Zfp69	0.00200257	0.0634811
Zic2	Zic2	0.0020064	0.0691471
Stk25	Stk25	0.00200088	0.00467597
Il2rg	Il2rg	0.00201894	0.010896
Tec	Tec	0.0112607	0.0249059
Irf6	Irf6	0.0020049	0.00275914
Ccnd3	Ccnd3	0.00218219	0.0251907
Emc1	Emc1	0.0020023	0.00505695
Mta2	Mta2	0.00199768	0.00229806
Fli1	Fli1	0.0020081	0.0535461
Ubap2	Ubap2	0.00199783	0.00261854
Asf1a	Asf1a	0.00200587	0.00201764
Vav2	Vav2	0.00935397	0.0146104
Ago2	Ago2	0.00560972	0.00581389
Cd72	Cd72	0.00200524	0.00525243
Clip2	Clip2	0.00199761	0.00231724
Ahi1	Ahi1	0.0019979	0.00271571
Bend6	Bend6	0.00525965	0.0055122
Ptprq	Ptprq	0.00202705	0.0656028
Igf2	Igf2	0.00203339	0.0302728
Cabyr	Cabyr	0.00201563	0.00201908
Msh2	Msh2	0.00247893	0.00464239
Clpp	Clpp	0.00199953	0.00428325
Ncoa2	Ncoa2	0.00199742	0.00211402
Opa1	Opa1	0.00199787	0.00514933
Spdef	Spdef	0.00200457	0.0128728
Vav3	Vav3	0.00199998	0.0026124
Ocrl	Ocrl	0.00199876	0.00277505
Rab4a	Rab4a	0.00200173	0.00210181
Ttll4	Ttll4	0.00201413	0.00267341
Idi1	Idi1	0.00200435	0.0395141
Msl1	Msl1	0.00199683	0.00530169
Tlr2	Tlr2	0.00200087	0.014981
Efhd2	Efhd2	0.00199672	0.00329577
Mcm7	Mcm7	0.00201134	0.0615081
Ncor1	Ncor1	0.00199798	0.003457
Grtp1	Grtp1	0.00200797	0.0297171
Cnot7	Cnot7	0.00199813	0.00340226
Crbn	Crbn	0.00199709	0.0020696
Micu2	Micu2	0.00200226	0.00791762
Ksr2	Ksr2	0.00199965	0.00208243
Cpeb1	Cpeb1	0.00205405	0.00663431
Cdc23	Cdc23	0.00259974	0.0032415
Azin2	Azin2	0.00212547	0.00378918
Dner	Dner	0.00231679	0.00248886
Evl	Evl	0.00200097	0.00428652
G0s2	G0s2	0.00200959	0.00486465
Blvrb	Blvrb	0.002001	0.00787607
Tbk1	Tbk1	0.0019989	0.00709579
Rac3	Rac3	0.00200173	0.00563869
Lca5	Lca5	0.027484	0.171716
Sf3b1	Sf3b1	0.00200245	0.0100495
Pax1	Pax1	0.00203042	0.00290673
Phf7	Phf7	0.00199855	0.01056
Rnf10	Rnf10	0.0019979	0.00762922
Nmt1	Nmt1	0.00200082	0.00221965
Irf9	Irf9	0.0762638	0.0125905
Ptov1	Ptov1	0.00200202	0.00560054
Frem1	Frem1	0.00201541	0.00998009
Mta1	Mta1	0.0019993	0.00259604
Grm1	Grm1	0.00205915	0.0125412
Nrip2	Nrip2	0.00200195	0.00209846
Rsrc1	Rsrc1	0.00200354	0.00369249
Ska3	Ska3	0.00726379	0.0128972
Drd2	Drd2	0.00199662	0.0129625
Rcan1	Rcan1	0.00200141	0.00582452
Taf5l	Taf5l	0.0020007	0.00837053
Nck1	Nck1	0.00199969	0.00644341
Mycbp	Mycbp	0.00200036	0.013084
Capg	Capg	0.00279828	0.00405726
Bcar1	Bcar1	0.00199768	0.0115289
Mkks	Mkks	0.0036037	0.0120531
Sox4	Sox4	0.00719089	0.00812394
Nfam1	Nfam1	0.00202513	0.0123503
Iws1	Iws1	0.00199719	0.0168888
Sphk2	Sphk2	0.00587349	0.00597629
Ets1	Ets1	0.00199803	0.00514011
Esr1	Esr1	0.00200349	0.00212101
Arl1	Arl1	0.00199863	0.00497424
Tpp2	Tpp2	0.00200143	0.0026821
Taf4b	Taf4b	0.00200707	0.00447858
Prdx5	Prdx5	0.00199709	0.00246271
Rab19	Rab19	0.00202947	0.00238325
Elk4	Elk4	0.00200209	0.0115662
Kcna4	Kcna4	0.00199641	0.00432791
Ggn	Ggn	0.00201604	0.00477152
Rxrb	Rxrb	0.00210885	0.00540719
Smc4	Smc4	0.00200138	0.00339534
Inadl	Inadl	0.00285511	0.0131346
Cebpz	Cebpz	0.0019976	0.00908013
Pth1r	Pth1r	0.00717662	0.00999442
Cpne8	Cpne8	0.00200198	0.00383146
Lsamp	Lsamp	0.0020015	0.0142513
Gdf5	Gdf5	0.00211378	0.337454
Nr1d1	Nr1d1	0.0934457	0.100811
Psmd5	Psmd5	0.00278162	0.0042615
Cd22	Cd22	0.00203073	0.0114519
Tox3	Tox3	0.00200053	0.00271114
Acadl	Acadl	0.00199905	0.00200366
Hck	Hck	0.00468069	0.0232575
Wnt6	Wnt6	0.00200921	0.00903667
Oas1b	Oas1b	0.049975	0.0307421
Msrb2	Msrb2	0.00199862	0.00229146
Sgk3	Sgk3	0.00199777	0.00203663
Pax8	Pax8	0.00265182	0.0169121
Fgfr2	Fgfr2	0.00201603	0.0151363
Bend3	Bend3	0.00200993	0.0246792
Nsun7	Nsun7	0.00203656	0.00976016
Hmgn1	Hmgn1	0.00200169	0.00200652
Btla	Btla	0.00200441	0.00326619
Glyr1	Glyr1	0.00199673	0.00273632
Cd4	Cd4	0.00204919	0.0332776
Podn	Podn	0.00201373	0.0146055
Cdc7	Cdc7	0.0020019	0.00288327
Thap7	Thap7	0.00200209	0.00317303
Ccar1	Ccar1	0.00200062	0.00283407
Phip	Phip	0.00261231	0.0288237
Tusc1	Tusc1	0.00200946	0.00242199
Rere	Rere	0.00338684	0.0514839
Pcsk4	Pcsk4	0.00202799	0.0549
Gmppb	Gmppb	0.00327428	0.00327598
Rnpc3	Rnpc3	0.00200156	0.0135306
Med26	Med26	0.00200114	0.00361696
Pdia2	Pdia2	0.00199812	0.0669124
Swi5	Swi5	0.00210832	0.00429614
Ptprg	Ptprg	0.00636695	0.0150257
Batf3	Batf3	0.00626135	0.0352696
Dact1	Dact1	0.00200255	0.00635629
Mul1	Mul1	0.00199831	0.00204276
Mat2b	Mat2b	0.00443706	0.00444397
Sav1	Sav1	0.00200096	0.00833938
Nxt1	Nxt1	0.00201298	0.00296497
Id1	Id1	0.0124984	0.0490461
Pdcd4	Pdcd4	0.00326201	0.00347844
Sltm	Sltm	0.00199626	0.0226038
Dlx4	Dlx4	0.0020283	0.00891485
Rcor3	Rcor3	0.00200115	0.0107398
Sdc3	Sdc3	0.0104236	0.0262246
Zeb2	Zeb2	0.013548	0.00796489
Nrbf2	Nrbf2	0.00200682	0.0489259
Lsm12	Lsm12	0.0020071	0.00452356
Nek2	Nek2	0.00204594	0.0144539
Ddx28	Ddx28	0.00200331	0.00431842
Paf1	Paf1	0.00200294	0.00758389
Kif3b	Kif3b	0.00199684	0.00234594
Trpm7	Trpm7	0.00199917	0.00524437
Mcf2l	Mcf2l	0.0045666	0.0207084
Psme2	Psme2	0.039805	0.0096777
Lck	Lck	0.00200738	0.00238952
Ccnt1	Ccnt1	0.0019992	0.0105169
Ipo13	Ipo13	0.00200154	0.0023127
Ddx54	Ddx54	0.00199876	0.0021241
Il1b	Il1b	0.00211302	0.0245686
Uck1	Uck1	0.00200246	0.0020475
Chd1l	Chd1l	0.00199966	0.00215944
Pak6	Pak6	0.00201283	0.0651235
Casz1	Casz1	0.00199674	0.00892251
Ndst1	Ndst1	0.00200355	0.00645062
Mapk3	Mapk3	0.00200132	0.00589779
Abca6	Abca6	0.0020014	0.00639363
Traf1	Traf1	0.00201772	0.0029892
Lsm7	Lsm7	0.00200855	0.00254473
Glrb	Glrb	0.0021017	0.00210302
Prdm6	Prdm6	0.00199951	0.0270852
Gmeb1	Gmeb1	0.00199646	0.00214855
Ap3b1	Ap3b1	0.00199697	0.00247787
Dpm2	Dpm2	0.00200285	0.0215317
Prnd	Prnd	0.00199736	0.0468528
Taf12	Taf12	0.00200286	0.00314165
Fzd4	Fzd4	0.00324284	0.00324768
Nop2	Nop2	0.00199736	0.0139645
Pcgf1	Pcgf1	0.00200436	0.0336632
Nmi	Nmi	0.0146188	0.00326751
Ppara	Ppara	0.00200235	0.00240478
Mob1a	Mob1a	0.00200428	0.00871043
Rcn2	Rcn2	0.00200063	0.00200049
Dctn1	Dctn1	0.00199772	0.00211454
Vps11	Vps11	0.00200071	0.0114395
Mmp2	Mmp2	0.0046204	0.0182885
Neil2	Neil2	0.00199689	0.00247549
Cdc37	Cdc37	0.00259863	0.00552268
Bmx	Bmx	0.00200625	0.00487016
Asxl1	Asxl1	0.00199711	0.00317786
Calca	Calca	0.114629	0.120324
Dph2	Dph2	0.00199983	0.00226274
Sost	Sost	0.00212519	0.00284658
Twsg1	Twsg1	0.00200227	0.00794717
Ppm1f	Ppm1f	0.0020001	0.00301894
Ubb	Ubb	0.00199801	0.0121862
Mnt	Mnt	0.00199676	0.00307214
Ostm1	Ostm1	0.00199677	0.00350161
Rsbn1	Rsbn1	0.00199911	0.00574484
Zmym2	Zmym2	0.00199905	0.00202651
Cotl1	Cotl1	0.015472	0.0189819
Bax	Bax	0.00200686	0.0054766
Prr12	Prr12	0.00199729	0.00246533
Wdr48	Wdr48	0.002	0.00244531
Aqp2	Aqp2	0.00207931	0.0285872
Sumo2	Sumo2	0.00618533	0.0252441
Sik2	Sik2	0.00456865	0.0046306
Elf4	Elf4	0.00201648	0.0253202
Kif4	Kif4	0.00200053	0.0510049
Ralb	Ralb	0.00199857	0.00210334
Usp9x	Usp9x	0.00442501	0.00449557
Per1	Per1	0.0108794	0.0289543
Socs3	Socs3	0.00201155	0.00826557
Sun1	Sun1	0.0019972	0.0151474
Rfc4	Rfc4	0.00200573	0.0159663
Srrt	Srrt	0.00278436	0.00337593
Fem1c	Fem1c	0.0019969	0.00213885
Pgam1	Pgam1	0.00200122	0.00248023
Magi1	Magi1	0.00199979	0.00267851
Asb3	Asb3	0.00200417	0.00204027
Vps53	Vps53	0.00199886	0.00476848
Gnb5	Gnb5	0.0020015	0.00521075
Lax1	Lax1	0.00201623	0.0148693
Foxf1	Foxf1	0.00200164	0.00390422
Exoc1	Exoc1	0.00199689	0.00483688
Hltf	Hltf	0.00221949	0.00723607
Cdc26	Cdc26	0.00200312	0.010767
Cul4b	Cul4b	0.0028879	0.018474
Dnmt1	Dnmt1	0.00932914	0.0376987
Rmi2	Rmi2	0.00205487	0.0388729
Ubfd1	Ubfd1	0.00199997	0.00965219
Cubn	Cubn	0.002017	0.0117787
Eif3l	Eif3l	0.00200109	0.0032902
Mpnd	Mpnd	0.00200015	0.00414642
Foxp1	Foxp1	0.0019965	0.0285259
Arpin	Arpin	0.00199826	0.00216553
Med1	Med1	0.00199898	0.00252755
Lin7b	Lin7b	0.00200339	0.0117101
Ubp1	Ubp1	0.00200065	0.019083
Meis2	Meis2	0.00234038	0.00271278
Tfec	Tfec	0.00202532	0.00636958
Cd68	Cd68	0.00201763	0.00936881
Sik1	Sik1	0.00201321	0.00272973
Mbd1	Mbd1	0.00284605	0.00472628
Ahrr	Ahrr	0.00202269	0.00554524
Hint1	Hint1	0.00200083	0.00238482
Rap1a	Rap1a	0.00746497	0.00750728
Tnik	Tnik	0.00200247	0.00200294
Hace1	Hace1	0.00199776	0.00311705
Ush1g	Ush1g	0.00200924	0.00470549
Mylk3	Mylk3	0.00202909	0.0504286
Pkn3	Pkn3	0.00199644	0.00515511
Rtkn	Rtkn	0.00200215	0.00371615
Gab1	Gab1	0.00200164	0.00208083
Kmt2e	Kmt2e	0.00199967	0.0129282
Six6	Six6	0.00202392	0.00204418
Loxl2	Loxl2	0.00201505	0.00364677
Gbp2	Gbp2	0.0122776	0.00371239
C1qb	C1qb	0.0186183	0.00200574
Saraf	Saraf	0.00199669	0.00678373
Aatf	Aatf	0.00200611	0.00244418
Hacd1	Hacd1	0.00199683	0.0171403
Drg1	Drg1	0.00199678	0.0153187
Ddx5	Ddx5	0.00199644	0.0273183
Dctn2	Dctn2	0.00199708	0.00199723
Rtn4	Rtn4	0.00199912	0.00200008
Atf7	Atf7	0.00199691	0.00596597
Ikzf3	Ikzf3	0.00201445	0.0505143
Rock1	Rock1	0.00200502	0.00274664
Trib3	Trib3	0.00200749	0.0190274
Nolc1	Nolc1	0.00199693	0.00278008
Znfx1	Znfx1	0.0357899	0.00370184
Srr	Srr	0.00200354	0.00386548
Mycn	Mycn	0.00199867	0.00986187
Npm2	Npm2	0.00207243	0.00356738
Litaf	Litaf	0.022083	0.0349374
Syn1	Syn1	0.00199952	0.0021363
Il1a	Il1a	0.00200085	0.0145614
Gna13	Gna13	0.0019997	0.00319383
Pgs1	Pgs1	0.00199692	0.0075702
Cdk16	Cdk16	0.00199746	0.00268708
Sntg2	Sntg2	0.0019967	0.028338
Ubap1	Ubap1	0.00200297	0.00233054
Ccne1	Ccne1	0.00221908	0.00476314
Ryr1	Ryr1	0.00203995	0.0053745
Rab12	Rab12	0.00199713	0.00232176
Fkbp7	Fkbp7	0.00200414	0.00201234
Snx12	Snx12	0.00200037	0.0026096
Ttc9b	Ttc9b	0.00199927	0.0153163
Pygb	Pygb	0.00200097	0.00833109
Fbxw4	Fbxw4	0.00200571	0.00379602
Vta1	Vta1	0.00200058	0.0241656
Spag5	Spag5	0.0062081	0.0677384
Rab5b	Rab5b	0.00199705	0.00223777
Fhdc1	Fhdc1	0.0267499	0.0270237
Ppia	Ppia	0.00200019	0.00969046
Bap1	Bap1	0.00199665	0.00763464
Myef2	Myef2	0.00218429	0.00227556
Kcne4	Kcne4	0.0020192	0.00271037
Ech1	Ech1	0.00199735	0.00843235
Terf1	Terf1	0.00227071	0.00314275
Uba1y	Uba1y	0.00200591	0.00208825
Gfpt1	Gfpt1	0.00200047	0.00252691
E2f8	E2f8	0.00202764	0.102263
Naa10	Naa10	0.00199988	0.0122767
Calr3	Calr3	0.00201677	0.00262929
Nfyc	Nfyc	0.0019979	0.0110465
Fbxw8	Fbxw8	0.0019968	0.00285051
Nck2	Nck2	0.012168	0.0151012
Anks6	Anks6	0.00200378	0.0158263
Trim8	Trim8	0.00200052	0.00269175
Srpk3	Srpk3	0.00200789	0.0537921
Trpm8	Trpm8	0.0034164	0.0133112
Csrp1	Csrp1	0.00199778	0.0020457
Akap5	Akap5	0.00202807	0.0106662
Il6ra	Il6ra	0.0807681	0.115927
Tnnt3	Tnnt3	0.00208723	0.0158914
Rgs14	Rgs14	0.00317836	0.00421511
Syne2	Syne2	0.00200163	0.00793477
Ano1	Ano1	0.00200043	0.00391857
Surf4	Surf4	0.00199819	0.0223003
Blmh	Blmh	0.00199895	0.00598357
Styx	Styx	0.00200315	0.0030836
Nol10	Nol10	0.00199896	0.00277077
Las1l	Las1l	0.00199779	0.00240076
Rab1b	Rab1b	0.00199834	0.00559225
Flrt3	Flrt3	0.00199898	0.0161719
Eif3f	Eif3f	0.00314616	0.00316446
Slpi	Slpi	0.113343	0.342513
Kcmf1	Kcmf1	0.00200025	0.00828135
Fes	Fes	0.00201803	0.0468521
Elk3	Elk3	0.00200129	0.00200096
Snf8	Snf8	0.00266743	0.00287801
Lyz1	Lyz1	0.00202034	0.00221495
Trnp1	Trnp1	0.00199821	0.00643572
Atr	Atr	0.00285465	0.0029213
Spef2	Spef2	0.0020568	0.0226288
Pacrg	Pacrg	0.00199737	0.00201002
Sh2b1	Sh2b1	0.00199869	0.00568101
Thy1	Thy1	0.0022747	0.00788578
Irf1	Irf1	0.0518955	0.00445931
Rbm34	Rbm34	0.00200891	0.00348304
Lnx2	Lnx2	0.002002	0.00288064
Ptma	Ptma	0.00199821	0.00875938
Ncf2	Ncf2	0.00200684	0.00220987
Vps72	Vps72	0.0019982	0.00235292
Six2	Six2	0.00204754	0.0336596
Orc3	Orc3	0.00199852	0.0019989
Bdnf	Bdnf	0.214133	0.280894
Arnt2	Arnt2	0.00462016	0.00570793
Vps36	Vps36	0.00200028	0.0182288
Adrm1	Adrm1	0.002552	0.00388709
Ap3d1	Ap3d1	0.00199888	0.00241773
Lsm5	Lsm5	0.00202922	0.00344539
Lasp1	Lasp1	0.00352178	0.0092151
Agap2	Agap2	0.00199934	0.013665
Cyb5b	Cyb5b	0.00199835	0.00635648
Hdgf	Hdgf	0.00199775	0.00906076
Polk	Polk	0.00201281	0.00283225
Vps45	Vps45	0.00200581	0.00348817
Spag7	Spag7	0.00581185	0.0128447
Cenpo	Cenpo	0.00199826	0.0376514
Ddx46	Ddx46	0.00340544	0.0154232
Ehd4	Ehd4	0.00199632	0.00231226
Tmub1	Tmub1	0.00199714	0.00227425
Dhx15	Dhx15	0.00200076	0.00451548
Loxl4	Loxl4	0.226682	0.226384
Ngp	Ngp	0.00377308	0.0701927
Flot1	Flot1	0.00200074	0.00246147
Cds2	Cds2	0.00204086	0.0043046
C1qa	C1qa	0.0113361	0.00234006
Xrcc5	Xrcc5	0.00200221	0.00295862
Ep300	Ep300	0.00199781	0.0028124
Rbm14	Rbm14	0.001997	0.00733553
Shc2	Shc2	0.00200047	0.0031332
Scyl2	Scyl2	0.00213933	0.00265431
Smug1	Smug1	0.00199836	0.00378084
Wbp2	Wbp2	0.00217087	0.00365139
Pkn2	Pkn2	0.00199969	0.0108911
Fmo5	Fmo5	0.00199938	0.00446247
Rexo1	Rexo1	0.00200176	0.00231249
Ush2a	Ush2a	0.0020624	0.0744066
Rtl1	Rtl1	0.00200917	0.0235834
Uba1	Uba1	0.00199834	0.00271655
Zfx	Zfx	0.0019963	0.00202312
Cap1	Cap1	0.00218485	0.00225416
Arf1	Arf1	0.00199733	0.00605411
Rrs1	Rrs1	0.00199983	0.0154447
Syvn1	Syvn1	0.00200154	0.00207157
Nfib	Nfib	0.00199917	0.00376838
Fbln5	Fbln5	0.0163075	0.0824597
Kcnq2	Kcnq2	0.00199982	0.0167482
Tfeb	Tfeb	0.00199691	0.00213052
Reps2	Reps2	0.00200129	0.00206297
Sfpq	Sfpq	0.00241892	0.00270457
Prrx1	Prrx1	0.00201421	0.00329056
Csf3r	Csf3r	0.00568254	0.05495
Mus81	Mus81	0.00200534	0.00846445
Dach1	Dach1	0.00346672	0.00884522
Tll1	Tll1	0.00199952	0.0160689
Icmt	Icmt	0.00199916	0.00201041
Nsf	Nsf	0.00199762	0.00220056
Kat8	Kat8	0.00199813	0.00227235
Sp1	Sp1	0.00200629	0.00200628
Naa30	Naa30	0.0102437	0.0118785
Ltv1	Ltv1	0.00200467	0.0231809
Bmp2k	Bmp2k	0.0059834	0.00604403
Rnps1	Rnps1	0.00199733	0.00666869
Cdk14	Cdk14	0.00200157	0.00211936
Htra2	Htra2	0.00200424	0.00273758
Smcr8	Smcr8	0.00199684	0.00413987
Kntc1	Kntc1	0.00479776	0.012053
Rbm26	Rbm26	0.00200407	0.013723
Myo1c	Myo1c	0.00644317	0.0069337
Pask	Pask	0.00200552	0.034835
Cul2	Cul2	0.00200067	0.00200787
Trap1	Trap1	0.00199878	0.00954648
Tert	Tert	0.00204787	0.0118161
Ufc1	Ufc1	0.00200279	0.00834896
Pde2a	Pde2a	0.00199932	0.00836996
Phf5a	Phf5a	0.00199984	0.00436192
Rest	Rest	0.002012	0.00372531
Itpr2	Itpr2	0.00200773	0.0149853
Adh1	Adh1	0.00201597	0.0575394
Ubac1	Ubac1	0.00200186	0.0105777
Ell2	Ell2	0.00199956	0.0150178
Atp7a	Atp7a	0.00254891	0.00269931
Wls	Wls	0.00292692	0.0107655
Bnc1	Bnc1	0.00727391	0.0117677
Copg2	Copg2	0.00211105	0.00669498
Mtcl1	Mtcl1	0.00199636	0.0020131
Atg7	Atg7	0.00199669	0.0101014
Kat6b	Kat6b	0.00199809	0.0218593
Cnn3	Cnn3	0.00795664	0.0231083
Ring1	Ring1	0.00199699	0.00958231
Syt6	Syt6	0.00199727	0.0031801
Ctxn1	Ctxn1	0.00200402	0.00234047
Unc79	Unc79	0.00200457	0.00929679
Ripk2	Ripk2	0.0020034	0.00270761
Hmha1	Hmha1	0.00830494	0.127988
Tefm	Tefm	0.00201592	0.0246205
Lactb	Lactb	0.00199921	0.033173
Cradd	Cradd	0.00200574	0.00302647
Map2	Map2	0.00200228	0.0155819
Plcg2	Plcg2	0.00201283	0.00339202
Nxph3	Nxph3	0.0056769	0.00569982
Ssbp3	Ssbp3	0.00200151	0.00203516
Itpa	Itpa	0.0020027	0.00512949
Gsk3b	Gsk3b	0.00259294	0.00456979
Nbr1	Nbr1	0.00199937	0.00252175
Madd	Madd	0.00199749	0.00229118
Ercc1	Ercc1	0.00199955	0.00349698
Nol3	Nol3	0.00200043	0.00239621
Zmiz2	Zmiz2	0.0019968	0.0024659
Ube2z	Ube2z	0.00200074	0.00289249
Gstm7	Gstm7	0.00812721	0.0326505
Memo1	Memo1	0.00199847	0.00289154
Tada1	Tada1	0.00199808	0.00373676
Srsf7	Srsf7	0.00200259	0.00230351
Pdk3	Pdk3	0.00200047	0.00650612
Per3	Per3	0.00204597	0.0315974
Bcr	Bcr	0.00199887	0.00199887
Herc2	Herc2	0.00395302	0.0355606
Acap1	Acap1	0.00201267	0.00299106
Alms1	Alms1	0.00200433	0.0230797
Dkc1	Dkc1	0.00200587	0.00498284
Rsph1	Rsph1	0.00201895	0.0377293
Id3	Id3	0.0355818	0.0448557
Gga3	Gga3	0.00200083	0.00228509
Ecsit	Ecsit	0.00200022	0.00395442
Cdc45	Cdc45	0.0025902	0.00784313
Smap2	Smap2	0.00199713	0.00201806
Vps35	Vps35	0.00200037	0.00311398
Eny2	Eny2	0.00254549	0.00972986
Tbl3	Tbl3	0.00199863	0.00204394
Phf12	Phf12	0.00200232	0.0127567
Neto1	Neto1	0.0020068	0.00224909
Ift57	Ift57	0.00200126	0.00570655
Cbx8	Cbx8	0.00238383	0.0049377
Ltbp4	Ltbp4	0.00199766	0.0089737
Senp7	Senp7	0.00199927	0.00539786
Sash3	Sash3	0.01479	0.0286305
Clic1	Clic1	0.00199649	0.0216857
Gipc2	Gipc2	0.00199983	0.00297819
Stx7	Stx7	0.00199735	0.00344527
Apbb3	Apbb3	0.00200054	0.00351714
Bank1	Bank1	0.00200713	0.00247249
Mcu	Mcu	0.00199648	0.00212258
Exoc4	Exoc4	0.00559605	0.0103791
Klf1	Klf1	0.00202511	0.00373517
Trabd	Trabd	0.00200077	0.0020072
Rab10	Rab10	0.00199639	0.00545931
Lamb1	Lamb1	0.00199717	0.00372253
Gata4	Gata4	0.0043904	0.0602954
Scimp	Scimp	0.0200066	0.0578713
Ndnf	Ndnf	0.00201933	0.00538946
Fkbp2	Fkbp2	0.00232178	0.00259456
Flna	Flna	0.0020031	0.0153067
Iffo1	Iffo1	0.00199809	0.00918074
Ebp	Ebp	0.0019968	0.00738224
Eme1	Eme1	0.00200268	0.0131435
Rtn3	Rtn3	0.00199945	0.00207356
Cwc22	Cwc22	0.00238369	0.00906637
Orc2	Orc2	0.00199702	0.00340641
Eci1	Eci1	0.00200134	0.006169
Magi2	Magi2	0.00200463	0.00230189
Fzd10	Fzd10	0.00199953	0.0114729
Cnih4	Cnih4	0.00200158	0.00380547
Fgf7	Fgf7	0.00296519	0.00765001
Syt7	Syt7	0.00199673	0.00785806
Gas1	Gas1	0.00346658	0.014245
Bet1	Bet1	0.00200545	0.00400595
Dnal1	Dnal1	0.00199769	0.00248358
Tmx1	Tmx1	0.00316055	0.00544512
Serf2	Serf2	0.00199768	0.0302352
Ribc1	Ribc1	0.00206326	0.0202613
Top2b	Top2b	0.00274477	0.00276941
Aptx	Aptx	0.00200163	0.00219998
Sin3a	Sin3a	0.00200094	0.00200654
Dtna	Dtna	0.00200327	0.00512604
Stmn2	Stmn2	0.00199782	0.00706496
Shc1	Shc1	0.032932	0.042194
Cdo1	Cdo1	0.0020001	0.00435338
Kdm4c	Kdm4c	0.00200018	0.00864855
Mavs	Mavs	0.00640998	0.0491239
Dyrk3	Dyrk3	0.00200897	0.00398756
Wipf1	Wipf1	0.00275839	0.0049394
Senp2	Senp2	0.00200091	0.00333678
Palm3	Palm3	0.00211221	0.00384556
Kcnd1	Kcnd1	0.00525658	0.00565622
Atf2	Atf2	0.0019996	0.00213272
Calb2	Calb2	0.085221	0.0865645
Gpm6b	Gpm6b	0.016449	0.0614752
Axin2	Axin2	0.00200468	0.00729154
Ufsp1	Ufsp1	0.00226875	0.00485197
Tfe3	Tfe3	0.00200152	0.00208747
Syt4	Syt4	0.0313968	0.0331936
Prox1	Prox1	0.00208563	0.00739274
Med6	Med6	0.00199674	0.00278826
Ric1	Ric1	0.00199806	0.00352365
Gabpa	Gabpa	0.00199877	0.0065739
Nxf1	Nxf1	0.00199661	0.00602569
Actn3	Actn3	0.00202545	0.0135096
Cep89	Cep89	0.00200073	0.017012
Akt1	Akt1	0.00199909	0.00454463
Vamp8	Vamp8	0.00200384	0.00753473
Clcc1	Clcc1	0.00200746	0.00744978
Nr2c2	Nr2c2	0.00199934	0.00202264
Aph1b	Aph1b	0.00255062	0.00294716
Rgl3	Rgl3	0.00202212	0.00228927
Rab38	Rab38	0.0631032	0.108115
Fkbp3	Fkbp3	0.00199979	0.00501147
Tbx6	Tbx6	0.00200566	0.00391128
Abhd5	Abhd5	0.00200047	0.0490097
Epas1	Epas1	0.00199804	0.00221747
Asph	Asph	0.00199653	0.00413913
Aph1a	Aph1a	0.00709445	0.0103198
Rab3c	Rab3c	0.00256799	0.002659
Letm1	Letm1	0.0019994	0.00284997
Stk11	Stk11	0.00199843	0.0020167
Xrcc2	Xrcc2	0.00200608	0.00239462
Egln3	Egln3	0.00734919	0.00778916
Edc4	Edc4	0.00200241	0.00869145
Psma8	Psma8	0.0020677	0.00593599
Ccpg1	Ccpg1	0.00199741	0.00308919
Ehd1	Ehd1	0.00199954	0.00391204
Abtb1	Abtb1	0.00200133	0.0020493
Tapt1	Tapt1	0.00200461	0.00890346
G3bp1	G3bp1	0.0019966	0.0101912
Adam9	Adam9	0.00200115	0.00230339
Birc3	Birc3	0.00200813	0.00676278
Mef2c	Mef2c	0.0237586	0.0242572
Grid2	Grid2	0.00200283	0.00262222
Tex15	Tex15	0.0020311	0.0526607
Foxj1	Foxj1	0.00200388	0.00381607
Lin7c	Lin7c	0.00199974	0.00201318
Svil	Svil	0.0136288	0.0162301
Jun	Jun	0.0289116	0.0293177
Ptprr	Ptprr	0.00199808	0.00948244
Ddx17	Ddx17	0.00200709	0.0146865
Zfp91	Zfp91	0.00231753	0.00425256
Chd1	Chd1	0.0020039	0.00242377
Gfpt2	Gfpt2	0.0020024	0.00339167
Stag3	Stag3	0.00202094	0.0433265
Dhx33	Dhx33	0.00200305	0.00216873
Rab24	Rab24	0.00200351	0.0148007
Ghitm	Ghitm	0.0019985	0.00283039
Sf3b3	Sf3b3	0.00200084	0.0034459
Xrn1	Xrn1	0.00199964	0.00886242
Nsun5	Nsun5	0.00200811	0.0146684
Cab39	Cab39	0.00199741	0.00440148
Trim9	Trim9	0.0219325	0.0220193
Eif3g	Eif3g	0.00199797	0.00202367
Sbno2	Sbno2	0.0174261	0.0210952
Bmp1	Bmp1	0.00199977	0.00747908
Dkkl1	Dkkl1	0.00204581	0.034184
Stk3	Stk3	0.00736591	0.00778712
Tbl1x	Tbl1x	0.00200002	0.00208285
Cnot1	Cnot1	0.00199687	0.00318852
Vps39	Vps39	0.00200033	0.00217351
Naaa	Naaa	0.00200192	0.00330456
Eya3	Eya3	0.0019964	0.00201677
Rufy3	Rufy3	0.00199644	0.00215664
Sap30	Sap30	0.00200059	0.00934695
Lzts2	Lzts2	0.00199711	0.00199689
Isl2	Isl2	0.00308377	0.00334375
Purb	Purb	0.00281014	0.00313849
Tada3	Tada3	0.00200302	0.00390631
Sep15	Sep15	0.00200023	0.0059595
Mmgt1	Mmgt1	0.00200152	0.00381115
Adck5	Adck5	0.00200676	0.00517208
Ecd	Ecd	0.00199669	0.0086055
Creb1	Creb1	0.00199837	0.00234121
Lmnb1	Lmnb1	0.00200826	0.00228803
Fus	Fus	0.00238802	0.0177762
Matr3	Matr3	0.00199668	0.00268576
Rhoc	Rhoc	0.00200623	0.00273447
Sesn3	Sesn3	0.00200522	0.0108386
Ubr1	Ubr1	0.00200079	0.00258479
Wdr83	Wdr83	0.00255866	0.0139784
Hey2	Hey2	0.0164694	0.0398625
Dbnl	Dbnl	0.0019963	0.00337304
Npas1	Npas1	0.00201648	0.0122061
Clip3	Clip3	0.00429747	0.00599909
Eaf2	Eaf2	0.00201739	0.0100817
Heyl	Heyl	0.00200665	0.00350763
Rras	Rras	0.00425802	0.0107662
Flnb	Flnb	0.00201096	0.00251464
Sytl3	Sytl3	0.00374882	0.00629007
Tcf7	Tcf7	0.00591285	0.00642572
Skil	Skil	0.00199945	0.00746765
Il6	Il6	0.00212345	0.0744561
Srp14	Srp14	0.00207045	0.00536837
Psmg2	Psmg2	0.00199791	0.00298098
Kdm5b	Kdm5b	0.0020041	0.00301092
Kcnh1	Kcnh1	0.00199903	0.00200103
Postn	Postn	0.180484	0.165043
Dna2	Dna2	0.0219035	0.0989503
Tmed1	Tmed1	0.00202317	0.029714
Kcna3	Kcna3	0.00200877	0.002028
Jag2	Jag2	0.00200011	0.00211676
Lrrk2	Lrrk2	0.00200188	0.0020853
Ola1	Ola1	0.00199875	0.00214002
Top3b	Top3b	0.00200302	0.00474321
Wdr46	Wdr46	0.00199651	0.00231025
Mcrs1	Mcrs1	0.00200052	0.00446254
Lrp6	Lrp6	0.00360092	0.00206128
Sra1	Sra1	0.00199965	0.0314524
Ptpre	Ptpre	0.00409004	0.00896745
Dok6	Dok6	0.00199711	0.0260008
Smad7	Smad7	0.00199793	0.010451
Rom1	Rom1	0.00200863	0.00201372
Ston2	Ston2	0.00199927	0.0054174
Yif1b	Yif1b	0.00199943	0.00894985
Gid8	Gid8	0.0020033	0.00726536
Pim2	Pim2	0.00200252	0.0154045
Adnp	Adnp	0.00199675	0.00200737
Ccl5	Ccl5	0.0020509	0.00215555
Syk	Syk	0.00200991	0.0590967
Yap1	Yap1	0.00337165	0.00467613
Hhex	Hhex	0.00201911	0.00216612
Lrrc1	Lrrc1	0.00200099	0.00305719
Tiam2	Tiam2	0.00277876	0.00758652
Coq4	Coq4	0.00200524	0.0391244
Cd6	Cd6	0.00391738	0.00753904
Stx8	Stx8	0.0020057	0.00350425
Ccnd2	Ccnd2	0.0293005	0.034769
Rora	Rora	0.00446637	0.00473463
Socs2	Socs2	0.00200446	0.00488626
Dhcr7	Dhcr7	0.00199879	0.0242513
Nfasc	Nfasc	0.00199989	0.0030648
Sbno1	Sbno1	0.00200068	0.0020478
Avil	Avil	0.00317033	0.0102217
Rab32	Rab32	0.00201712	0.00228863
Nipbl	Nipbl	0.00200118	0.00200116
Ncam1	Ncam1	0.0019966	0.00842271
Aff4	Aff4	0.00228171	0.00470097
Ikzf4	Ikzf4	0.00203276	0.00684975
Keap1	Keap1	0.00200444	0.00201186
Tacc1	Tacc1	0.00199637	0.00292341
Met	Met	0.00384004	0.00217138
Traf2	Traf2	0.00200721	0.00970209
Enkur	Enkur	0.00203817	0.0233658
Pde3a	Pde3a	0.0020043	0.00215521
Drp2	Drp2	0.00199695	0.00333021
Hif1a	Hif1a	0.00200094	0.00223918
Larp7	Larp7	0.00199674	0.00353859
Stx16	Stx16	0.00200076	0.0527319
Ntng2	Ntng2	0.00288438	0.0029405
Smc3	Smc3	0.00200021	0.00216494
Lcor	Lcor	0.0020042	0.00685887
Shprh	Shprh	0.00199839	0.00775419
Mdfi	Mdfi	0.00204039	0.00912863
Cbx1	Cbx1	0.00247225	0.00277451
Lrp8	Lrp8	0.0417139	0.0632629
Hook3	Hook3	0.00199943	0.0101085
Ung	Ung	0.00199607	0.00252333
Rreb1	Rreb1	0.00199931	0.0131573
Trip6	Trip6	0.00200962	0.00914869
Hmmr	Hmmr	0.00201826	0.0198642
Taf11	Taf11	0.00200116	0.00220709
Banp	Banp	0.00200752	0.00375225
Fancm	Fancm	0.0020051	0.0201874
Ctr9	Ctr9	0.0019983	0.00208535
Rrn3	Rrn3	0.00199712	0.00358
Zfp1	Zfp1	0.00199876	0.0111321
Med20	Med20	0.00200444	0.00200428
Fxr2	Fxr2	0.00199758	0.0022537
Cnr1	Cnr1	0.00885456	0.0115775
Fat2	Fat2	0.00452587	0.0305969
Tead2	Tead2	0.00200286	0.00200409
Rbm4	Rbm4	0.00199844	0.00244257
Kif22	Kif22	0.00263818	0.0279831
Dcp1a	Dcp1a	0.00200154	0.00644109
Oaz1	Oaz1	0.00199812	0.00707329
Sgpl1	Sgpl1	0.00332884	0.00340292
Gdf9	Gdf9	0.00199946	0.0118359
Nup93	Nup93	0.0159329	0.0188315
Gstk1	Gstk1	0.00383013	0.00383509
Uchl1	Uchl1	0.00199626	0.002754
Apba1	Apba1	0.00199649	0.00199675
C1qbp	C1qbp	0.00217511	0.00468432
Ank2	Ank2	0.0061489	0.0378466
Dok2	Dok2	0.00203875	0.00382321
Mnd1	Mnd1	0.00199961	0.00199877
Parp9	Parp9	0.264964	0.0573787
Ggh	Ggh	0.00199791	0.00269141
Dgat1	Dgat1	0.00199892	0.0244345
Park7	Park7	0.00276044	0.00664977
Sp2	Sp2	0.00205062	0.0020623
Mbd2	Mbd2	0.0019966	0.00199634
Ap2a1	Ap2a1	0.00200039	0.00254411
Fitm1	Fitm1	0.00211737	0.0127901
Fcf1	Fcf1	0.00200218	0.020281
Mael	Mael	0.0101657	0.0102317
Mlip	Mlip	0.00200059	0.0154458
Dok7	Dok7	0.0035884	0.0155536
Nob1	Nob1	0.0020009	0.00200543
Dlx5	Dlx5	0.00200675	0.0124638
Ddx58	Ddx58	0.241878	0.0806906
Rrbp1	Rrbp1	0.00200136	0.00245887
Lgr6	Lgr6	0.00201761	0.049846
Ryk	Ryk	0.00200195	0.0118852
Gem	Gem	0.0130847	0.0178343
Sgsm1	Sgsm1	0.00199729	0.00327786
Rspo2	Rspo2	0.00626656	0.00759814
Derl2	Derl2	0.00199616	0.00244654
Syne4	Syne4	0.00201194	0.00223517
Adcy5	Adcy5	0.00199719	0.00348347
Mtmr1	Mtmr1	0.00200208	0.0237043
Rab31	Rab31	0.0145184	0.0449582
Egln1	Egln1	0.00199802	0.0106933
Rif1	Rif1	0.00199603	0.00206599
Sox6	Sox6	0.0333633	0.0365317
Ndst4	Ndst4	0.0304582	0.0304659
Ncam2	Ncam2	0.00283846	0.182202
Kat7	Kat7	0.00199687	0.00619698
Kif27	Kif27	0.00202378	0.00802235
Cd47	Cd47	0.00199793	0.00329518
Hspb8	Hspb8	0.00199826	0.00799331
Zfp11	Zfp11	0.0019986	0.00215685
Amer3	Amer3	0.00200349	0.00669609
Cwc15	Cwc15	0.0104655	0.0198147
Tcf15	Tcf15	0.00213146	0.00555132
As3mt	As3mt	0.00234058	0.0389738
Phc3	Phc3	0.00199614	0.00473429
Sat1	Sat1	0.0113198	0.00894559
Dek	Dek	0.00199995	0.00331138
Ddb2	Ddb2	0.00199867	0.00387651
Lrch3	Lrch3	0.00552558	0.00555615
Espl1	Espl1	0.00202098	0.0635576
Trdn	Trdn	0.00212996	0.0560988
Clcn5	Clcn5	0.00200071	0.00844365
Jph1	Jph1	0.00199994	0.00405689
Atg4b	Atg4b	0.00199666	0.0020039
Npas4	Npas4	0.00206938	0.0342041
Nkap	Nkap	0.00199711	0.00333552
Nop10	Nop10	0.0020019	0.0252805
Lrp1b	Lrp1b	0.00200077	0.0032065
Eea1	Eea1	0.0019965	0.00787021
Gstp1	Gstp1	0.00200211	0.00309453
Klf16	Klf16	0.00200311	0.00210593
Ntpcr	Ntpcr	0.00200071	0.00220237
Nphp3	Nphp3	0.00200096	0.0453574
Cd5l	Cd5l	0.00202327	0.0197047
Msh6	Msh6	0.00199749	0.00336171
Ddx49	Ddx49	0.00199786	0.00242149
Ehd2	Ehd2	0.00199986	0.00981314
Wdhd1	Wdhd1	0.00200102	0.00202105
Orc5	Orc5	0.00215749	0.00216113
Cenpj	Cenpj	0.00200238	0.00204855
Rbms1	Rbms1	0.00199966	0.0192015
Cdsn	Cdsn	0.00201743	0.0027117
Tnip2	Tnip2	0.00200046	0.101519
Actn1	Actn1	0.00200336	0.00349367
Grpr	Grpr	0.00200885	0.00904606
Cenpb	Cenpb	0.00199665	0.00214525
Plk4	Plk4	0.00199928	0.00220124
Klhl1	Klhl1	0.00204	0.00207462
Sgk1	Sgk1	0.236602	0.236797
Oat	Oat	0.00199763	0.00199819
Med31	Med31	0.00199802	0.00578701
Ncf4	Ncf4	0.00202522	0.0205004
Tirap	Tirap	0.00200871	0.00224218
Fhl1	Fhl1	0.00199642	0.00682687
Sgip1	Sgip1	0.00200157	0.00250981
Ssna1	Ssna1	0.0020043	0.00442237
Rgs3	Rgs3	0.00199742	0.00199838
Sync	Sync	0.002215	0.00394434
Nbn	Nbn	0.00329093	0.00809394
Lhx3	Lhx3	0.00210156	0.00300436
Surf6	Surf6	0.00200015	0.00540596
Mtmr3	Mtmr3	0.00199772	0.00250317
Dedd	Dedd	0.0020017	0.00654445
Cenpv	Cenpv	0.00200307	0.00264534
Ret	Ret	0.00333627	0.0159092
Cwc27	Cwc27	0.00199983	0.0196643
Poli	Poli	0.00200025	0.00765864
Dkk3	Dkk3	0.00662804	0.00669021
Wdr34	Wdr34	0.00200468	0.0286207
Rfx1	Rfx1	0.00199848	0.0185187
Tpm1	Tpm1	0.00199863	0.00235068
C1qc	C1qc	0.00822463	0.00257188
Klc2	Klc2	0.00665251	0.0100539
Nab2	Nab2	0.00967756	0.0252739
Sarnp	Sarnp	0.00200047	0.00284368
Pex14	Pex14	0.00473824	0.00653743
Coro7	Coro7	0.00209426	0.0117458
Myo19	Myo19	0.00200608	0.00323186
Cbx6	Cbx6	0.00199664	0.00201462
Ccl25	Ccl25	0.00199899	0.0132424
Pex19	Pex19	0.00199895	0.00237485
Mafa	Mafa	0.00199886	0.00200869
Kif2c	Kif2c	0.00206321	0.0145114
Ing4	Ing4	0.00200767	0.0188785
Hlf	Hlf	0.00200895	0.0314519
Rnf14	Rnf14	0.00199813	0.0021684
Rfx4	Rfx4	0.0020388	0.0025196
Rara	Rara	0.00200255	0.00280254
Cdc16	Cdc16	0.00199628	0.00255516
Stk36	Stk36	0.0022598	0.00249072
Daxx	Daxx	0.00408372	0.00368025
Mak	Mak	0.00202915	0.056937
Rufy2	Rufy2	0.00200138	0.0031887
Mast2	Mast2	0.00199746	0.00207268
Nat10	Nat10	0.0032026	0.0498148
Rpp30	Rpp30	0.0020046	0.00492899
Srrm2	Srrm2	0.00200179	0.0378351
Kif23	Kif23	0.00199774	0.132849
Vrk1	Vrk1	0.00200872	0.0218286
Apoe	Apoe	0.00211366	0.0813529
Unc5d	Unc5d	0.00201648	0.0154079
Parvb	Parvb	0.0019983	0.00199959
Kcnd2	Kcnd2	0.00199668	0.0208088
Krit1	Krit1	0.0019973	0.0171489
Nop9	Nop9	0.00200228	0.00666696
Ddx24	Ddx24	0.00207779	0.00275713
Pitx3	Pitx3	0.00205344	0.00705833
Plin2	Plin2	0.00199898	0.00543328
Pde5a	Pde5a	0.00200943	0.0143877
Shb	Shb	0.00200934	0.00201853
Osmr	Osmr	0.00454208	0.0126973
Cand1	Cand1	0.00199959	0.00474135
Rab3b	Rab3b	0.00456937	0.00540594
Fut8	Fut8	0.00349372	0.0236234
Glrx3	Glrx3	0.00199845	0.00736346
Cyhr1	Cyhr1	0.00200057	0.00249643
Cdk7	Cdk7	0.00218159	0.00228995
Lat	Lat	0.00207681	0.0115125
Nub1	Nub1	0.00199799	0.0029324
Sap18	Sap18	0.00199877	0.0104358
Cmc2	Cmc2	0.00200331	0.00247526
Ufm1	Ufm1	0.00200177	0.00284617
Mrgbp	Mrgbp	0.00201271	0.0127409
Rsad2	Rsad2	0.322835	0.0268274
Brd9	Brd9	0.0020004	0.0264566
Zfp82	Zfp82	0.00763981	0.0237281
Gpn1	Gpn1	0.00200017	0.00800397
Klhl6	Klhl6	0.00201193	0.00395332
Bambi	Bambi	0.0296627	0.00355532
Pin1	Pin1	0.00199876	0.00254308
Abcf1	Abcf1	0.00213911	0.00880454
Rtn4r	Rtn4r	0.00200302	0.0150127
Vasp	Vasp	0.0020033	0.00714616
Mef2a	Mef2a	0.0019982	0.00500525
Mlxip	Mlxip	0.00199899	0.0278167
Rab8a	Rab8a	0.00200195	0.00982067
Rybp	Rybp	0.00200207	0.0064623
Cdt1	Cdt1	0.00200638	0.00476377
Ctu1	Ctu1	0.00438974	0.00454694
Phrf1	Phrf1	0.00199722	0.00228024
Cbl	Cbl	0.0032046	0.00325531
Klc4	Klc4	0.00200506	0.0123656
Stat4	Stat4	0.00208982	0.00453625
Pld3	Pld3	0.00200074	0.00254386
Vps4b	Vps4b	0.00200198	0.00333264
Baz2a	Baz2a	0.00305489	0.0112877
Mylk	Mylk	0.00693936	0.0447142
Gpnmb	Gpnmb	0.00199878	0.00457866
Mak16	Mak16	0.00200778	0.00358117
Fhod1	Fhod1	0.00200078	0.052931
Taf7	Taf7	0.00200196	0.00213168
Kdm6b	Kdm6b	0.00199842	0.002479
Nlgn3	Nlgn3	0.00200298	0.0101622
Bcl6	Bcl6	0.0045085	0.00483089
Ctf1	Ctf1	0.00202937	0.00399721
Tgif1	Tgif1	0.0020016	0.0208698
Ddah2	Ddah2	0.00200239	0.00406922
Spag8	Spag8	0.00201345	0.0419569
Flrt1	Flrt1	0.00199839	0.00204146
Ldb2	Ldb2	0.00200291	0.00728749
Cir1	Cir1	0.00200717	0.00519685
Alk	Alk	0.00202381	0.0916492
Wdr62	Wdr62	0.00761627	0.0294821
Chkb	Chkb	0.00200332	0.00659536
Rbmx	Rbmx	0.00200178	0.0390313
Epn3	Epn3	0.00604669	0.0143175
Ttll3	Ttll3	0.00200265	0.00234022
Basp1	Basp1	0.00200058	0.01334
Hacd3	Hacd3	0.00199777	0.00789426
Sytl2	Sytl2	0.00199825	0.00208971
Tlr11	Tlr11	0.00205956	0.0150961
Wwp1	Wwp1	0.00200203	0.0020205
Diap1	Diap1	0.00200119	0.00999417
Vgll4	Vgll4	0.0170983	0.0189557
Matk	Matk	0.00200058	0.00200061
Sumf2	Sumf2	0.00200016	0.00335188
Spop	Spop	0.0019992	0.00214169
Snx3	Snx3	0.00331534	0.019314
Thoc1	Thoc1	0.00200287	0.0327658
Etv4	Etv4	0.00199977	0.0702866
Abcd1	Abcd1	0.00426947	0.00434423
Meis1	Meis1	0.0102381	0.0125261
Ddx27	Ddx27	0.00284168	0.0163381
Dlg1	Dlg1	0.00200653	0.00208255
Mag	Mag	0.00200752	0.0399357
Gli1	Gli1	0.00200427	0.0131313
Tyrp1	Tyrp1	0.00950668	0.160971
Mkrn2	Mkrn2	0.0019978	0.00370513
Kdm4b	Kdm4b	0.00199644	0.00674183
Plcb2	Plcb2	0.00203833	0.0291927
Mtf1	Mtf1	0.00199867	0.00432142
Ddx52	Ddx52	0.00200044	0.00871914
Myh7	Myh7	0.0144469	0.0479056
Tradd	Tradd	0.00199971	0.00235075
Gata1	Gata1	0.00203901	0.0368384
Ube2o	Ube2o	0.00200024	0.00809939
Pde4a	Pde4a	0.00201586	0.0317427
Cep55	Cep55	0.00205851	0.00779842
Htra1	Htra1	0.00199966	0.00485821
Atg5	Atg5	0.00200373	0.00480468
Ikzf1	Ikzf1	0.00253773	0.0127526
Nrap	Nrap	0.0107978	0.0552199
Zfp58	Zfp58	0.00205541	0.014891
Myd88	Myd88	0.00199666	0.013048
Eci2	Eci2	0.00200138	0.00245612
Bag5	Bag5	0.00200121	0.00430674
Pde1b	Pde1b	0.00201229	0.00215589
Cutc	Cutc	0.00201341	0.00829765
Pbx3	Pbx3	0.00200123	0.022035
Osr2	Osr2	0.00288573	0.0155934
Ptprj	Ptprj	0.00200093	0.00351504
Qsox2	Qsox2	0.00199763	0.00305327
Nucb1	Nucb1	0.00200095	0.0120255
Fry	Fry	0.00237171	0.0342104
Ulk2	Ulk2	0.00199627	0.00341177
Agap1	Agap1	0.00200123	0.00202725
Bmp6	Bmp6	0.00201681	0.0270242
Ppig	Ppig	0.00200206	0.0035822
Smad6	Smad6	0.00319126	0.020748
Nop16	Nop16	0.00200704	0.0200128
Mylip	Mylip	0.0034045	0.0313612
Peg10	Peg10	0.00200702	0.0283355
Phf19	Phf19	0.00243287	0.011576
Wnt7a	Wnt7a	0.00325661	0.00368037
Vgll2	Vgll2	0.0020184	0.00891459
Kank2	Kank2	0.00261401	0.0206563
Ep400	Ep400	0.00200425	0.00245871
[truncated: 1,995 more rows]

## Sheet: i. WikiPathway Enrichments
Term	Combined Score_1v0	Combined Score_3v0	Combined Score_30v0	Combined Score_all	Genes_1v0	Genes_3v0	Genes_30v0	Genes_all	Adjusted P-value_1v0	Adjusted P-value_3v0	Adjusted P-value_30v0	Adjusted P-value_all	Overlap_1v0	Overlap_3v0	Overlap_30v0	Overlap_all
IL-7 Signaling Pathway WP297	2019.48	1875.5	967.064	1076.18	GSK3B;STAT1;GRB2;CBL;MCL1	GSK3B;STAT1;CDK4;AKT1;CBLB;GRB2;CBL	GSK3B;CDK4;AKT1;GRB2;CBL;MCL1	GSK3B;STAT1;CDK4;AKT1;CBLB;GRB2;CBL;MCL1	2.34295e-07	9.59098e-10	1.04627e-07	1.04599e-09	5/44	7/44	6/44	8/44
IL-5 Signaling Pathway WP151	691.946	484.215	348.734	297.828	GSK3B;STAT1;GRB2;CBL	GSK3B;STAT1;AKT1;GRB2;CBL	GSK3B;AKT1;GRB2;RAC1;CBL	GSK3B;STAT1;AKT1;GRB2;RAC1;CBL	9.61935e-05	7.26187e-06	2.47382e-05	6.45408e-06	4/69	5/69	5/69	6/69
ErbB signaling pathway WP1261	614.962	501.253	363.556	205.588	GSK3B;GRB2;EGFR	GSK3B;SRC;GRB2;EGFR	GSK3B;SRC;GRB2;EGFR	GSK3B;SRC;GRB2;EGFR	0.000572721	3.90658e-05	0.000103589	0.0003173	3/46	4/46	4/46	4/46
IL-9 Signaling Pathway WP10	577.929	616.294	184.328	260.876	STAT1;GRB2	STAT1;AKT1;GRB2	AKT1;GRB2	STAT1;AKT1;GRB2	0.00465468	0.000163154	0.011598	0.000916324	2/24	3/24	2/24	3/24
EPO Receptor Signaling WP1249	522.635	1051.74	406.778	447.912	STAT1;GRB2	SRC;STAT1;AKT1;GRB2	SRC;AKT1;GRB2	SRC;STAT1;AKT1;GRB2	0.00508244	5.74818e-06	0.000534664	4.37815e-05	2/26	4/26	3/26	4/26
IL-3 Signaling Pathway WP373	425.671	445.244	318.171	252.001	GSK3B;STAT1;GRB2;CBL	GSK3B;STAT1;SRC;AKT1;GRB2;CBL	GSK3B;SRC;AKT1;GRB2;RAC1;CBL	GSK3B;STAT1;SRC;AKT1;GRB2;RAC1;CBL	0.000213076	2.38363e-06	7.83463e-06	4.43141e-06	4/100	6/100	6/100	7/100
Kit Receptor Signaling Pathway WP407	378.079	763.316	363.071	444.954	STAT1;GRB2;CBL	STAT1;SRC;AKT1;GRB2;CBLB;CBL	SRC;AKT1;EP300;GRB2;CBL	SRC;STAT1;AKT1;EP300;CBLB;GRB2;CBL	0.00118611	3.15872e-07	2.3721e-05	4.85041e-07	3/67	6/67	5/67	7/67
p38 MAPK Signaling Pathway WP350	345.821	148.065	106.937	149.92	STAT1;GRB2	STAT1;GRB2	GRB2;RAC1	STAT1;GRB2;RAC1	0.008057	0.0138926	0.0217088	0.0023368	2/36	2/36	2/36	3/36
IL-2 Signaling Pathway WP450	320.373	255.206		100.097	STAT1;GRB2;CBL	STAT1;AKT1;GRB2;CBL		STAT1;AKT1;GRB2;CBL	0.00155601	0.0001863		0.00159842	3/76	4/76		4/76
Adipogenesis genes WP447	287.546				EPAS1;STAT1;AHR;HIF1A				0.000543948				4/134
IL-6 signaling Pathway WP387	225.25	176.822	322.678	255.697	GSK3B;STAT1;GRB2	GSK3B;STAT1;AKT1;GRB2	GSK3B;CDK5;AKT1;EP300;GRB2;RAC1	GSK3B;CDK5;STAT1;AKT1;EP300;GRB2;RAC1	0.00310214	0.000413995	8.4347e-06	4.65223e-06	3/99	4/99	6/99	7/99
Focal Adhesion-PI3K-Akt-mTOR-signaling pathway WP2841	217.277	117.621			GSK3B;EPAS1;GRB2;HIF3A;HIF1A;EGFR	GSK3B;INSR;MDM2;AKT1;GRB2;HIF3A;EGFR			8.1003e-05	6.14647e-05			6/324	7/324
EGFR1 Signaling Pathway WP572	194.708	392.48	366.749	397.955	STAT1;GRB2;CBL;EGFR	ITCH;STAT1;SRC;AKT1;GRB2;CBLB;CBL;EGFR	SMAD3;SRC;AKT1;GRB2;AP2A1;RAC1;CBL;EGFR;GIT1	ITCH;SMAD3;STAT1;SRC;AKT1;CBLB;GRB2;AP2A1;RAC1;CBL;EGFR;GIT1	0.00118311	2.65933e-07	8.8714e-08	7.46332e-10	4/178	8/178	9/178	12/178
TNF-alpha NF-kB Signaling Pathway WP246	181.764	184.348		136.358	GSK3B;STAT1;TRAF6;TIFA	GSK3B;STAT1;SRC;TRAF6;TIFA;AKT1		GSK3B;SUMO1;STAT1;SRC;KCNQ1;TRAF6;TIFA;AKT1	0.00125446	3.80087e-05		1.53577e-05	4/187	6/187		8/187
ESC Pluripotency Pathways WP339	177.543	231.802			GSK3B;GRB2;EGFR	GSK3B;MDM2;AKT1;GRB2;EGFR			0.0047707	6.14115e-05			3/118	5/118
Alpha6-Beta4 Integrin Signaling Pathway WP488	153.787	303.076	551.947	310.439	GRB2;EGFR	SRC;AKT1;GRB2;EGFR	SMAD3;SRC;AKT1;GRB2;RAC1;EGFR	SMAD3;SRC;AKT1;GRB2;RAC1;EGFR	0.0235201	0.000124204	1.12639e-06	5.86018e-06	2/67	4/67	6/67	6/67
Apoptosis WP1254	119.212	121.092			IRF7;MCL1	IRF7;MDM2;AKT1			0.032506	0.00401035			2/81	3/81
MAPK signaling pathway WP493	117.478	335.397	105.654	174.918	TRAF6;GRB2;EGFR	BDNF;TRAF6;AKT1;GRB2;ARRB1;ARRB2;EGFR	BDNF;AKT1;GRB2;RAC1;EGFR	BDNF;TRAF6;AKT1;GRB2;ARRB1;ARRB2;RAC1;EGFR	0.0085454	1.85206e-06	0.000760617	6.12866e-06	3/159	7/159	5/159	8/159
Insulin Signaling WP65	117.478	232.969	163.541	174.918	GSK3B;GRB2;CBL	GSK3B;INSR;AKT1;GRB2;CBLB;CBL	GSK3B;KIF3A;AKT1;GRB2;RAC1;CBL	GSK3B;KIF3A;INSR;AKT1;CBLB;GRB2;RAC1;CBL	0.0091151	1.85228e-05	7.26973e-05	6.74153e-06	3/159	6/159	6/159	8/159
Delta-Notch Signaling Pathway WP265	115.34	226.057	270.13	228.889	GSK3B;EGFR	GSK3B;ITCH;AKT1;EGFR	GSK3B;SMAD3;AKT1;EP300;EGFR	GSK3B;ITCH;SMAD3;AKT1;EP300;EGFR	0.0325441	0.000232207	5.16982e-05	1.5747e-05	2/83	4/83	5/83	6/83
ApoE and miR-146 in inflammation and atherosclerosis WP3592		4630.71		2079.91		IRAK1;TRAF6;APOE;TLR4		IRAK1;TRAF6;APOE;TLR4		1.24646e-07		6.15683e-07		4/8		4/8
Toll Like Receptor signaling WP88		773.783		324.829		IRAK1;TRAF6;TLR4;MYD88		IRAK1;TRAF6;TLR4;MYD88		1.27296e-05		9.95784e-05		4/33		4/33
IL-1 Signaling Pathway WP37		666.921		277.864		IRAK1;TRAF6;AKT1;MYD88		IRAK1;TRAF6;AKT1;MYD88		1.72739e-05		0.00014423		4/37		4/37
Novel Jun-Dmp1 Pathway WP3654		555.913	165.758	234.176		CCND1;CDK4;MDM2	CCND1;CDK4	CCND1;CDK4;MDM2		0.000182825	0.0131829	0.00108921		3/26	2/26	3/26
Wnt Signaling Pathway NetPath WP539		400.641	737.942	661.386		GSK3B;CCND1;DLG4;AKT1;ARRB1;ARRB2	GSK3B;SMAD3;CCND1;SUMO1;DLG4;AKT1;PIN1;EP300;RAC1	GSK3B;SMAD3;CCND1;SUMO1;DLG4;AKT1;PIN1;EP300;ARRB1;ARRB2;RAC1		3.2372e-06	3.00089e-09	1.81936e-10		6/108	9/108	11/108
Leptin Insulin Overlap WP578		366.339		155.484		INSR;AKT1		INSR;AKT1		0.00389224		0.0109496		2/18		2/18
G1 to S cell cycle control WP413		344.059		137.844		PCNA;CCND1;CDK4;MDM2		PCNA;CCND1;CDK4;MDM2		8.98725e-05		0.000892353		4/61		4/61
EBV LMP1 signaling WP1243		282.939		118.638		IRAK1;TRAF6		IRAK1;TRAF6		0.00550002		0.0156074		2/22		2/22
Focal Adhesion WP85		270.425	261.339	185.486		GSK3B;CAV3;CCND1;SRC;AKT1;GRB2;EGFR	GSK3B;CCND1;SRC;ACTN1;AKT1;GRB2;RAC1;EGFR	GSK3B;CAV3;CCND1;SRC;ACTN1;AKT1;GRB2;RAC1;EGFR		3.26499e-06	1.31329e-06	2.30675e-06		7/185	8/185	9/185
Estrogen signaling WP1244		250.669	299.811	165.996		CCND1;SRC;AKT1;GRB2	CCND1;SRC;AKT1;EP300;GRB2	CCND1;SRC;AKT1;EP300;GRB2		0.000187665	3.88709e-05	0.000146357		4/77	5/77	5/77
Chemokine signaling pathway WP2292		180.118				GSK3B;STAT1;AKT1;GRB2;ARRB1;ARRB2				3.90625e-05				6/190
Spinal Cord Injury WP2432		176.822	125.224	114.689		CCND1;BDNF;CDK4;TLR4	CCND1;BDNF;CDK4;NOS1	CCND1;BDNF;CDK4;NOS1;TLR4		0.000429328	0.00136227	0.000453056		4/99	4/99	5/99
Integrin-mediated Cell Adhesion WP6		174.34	207.838	174.554		CAV3;SRC;AKT1;GRB2	SRC;ACTN1;AKT1;GRB2;RAC1	CAV3;SRC;ACTN1;AKT1;GRB2;RAC1		0.000415709	0.000103442	4.17356e-05		4/100	5/100	6/100
Signaling of Hepatocyte Growth Factor Receptor WP193		159.801	115.589			SRC;GRB2	SRC;GRB2			0.0127601	0.0199394			2/34	2/34
p53 signaling WP2902		157.706				CCND1;CDK4;MDM2				0.00253056				3/67
Primary Focal Segmental Glomerulosclerosis FSGS WP2573		142.749		108.376		PCNA;AKT1;TLR4		PCNA;AKT1;ACTN4;TLR4		0.00302556		0.00147148		3/72		4/72
Oxidative Damage WP1496		120.332				PCNA;TRAF6				0.0183196				2/42
Striated Muscle Contraction WP216		109.574		109.595		MYH1;DMD		MYH1;DMD;ACTN4		0.0199008		0.00428018		2/45		3/45
Robo4 and VEGF Signaling Pathways Crosstalk WP3864			1080.17	646.001			SRC;RAC1	SRC;RAC1			0.00100911	0.00150341			2/6	2/6
PluriNetWork WP1763			289.782	229.594			GSK3B;SMAD3;CCND1;SUMO1;SALL4;AKT1;PIN1;EP300;GRB2;NANOG;HIF1A	GSK3B;SMAD3;INSR;HIF1A;CCND1;SUMO1;SALL4;MDM2;AKT1;PIN1;EP300;NANOG;GRB2			3.89361e-08	1.33302e-08			11/292	13/292
Alzheimers Disease WP2075			185.881	102.07			GSK3B;CDK5;NOS1;APOE	GSK3B;CDK5;NOS1;APOE			0.000565035	0.00156521			4/75	4/75
Wnt Signaling Pathway WP403			131.45				GSK3B;CCND1;RAC1				0.00447336				3/60
Factors and pathways affecting insulin-like growth factor (IGF1)-Akt signaling WP3675			130.975				SMAD3;AKT1				0.0181269				2/31
Hypothetical Network for Drug Addiction WP1246			130.975				GRIA2;GRM5				0.0175938				2/31
Ovarian Infertility Genes WP273			130.975				SMAD3;CDK4				0.0170911				2/31
Wnt Signaling Pathway and Pluripotency WP723			128.966				GSK3B;CCND1;EP300;NANOG				0.00131904				4/97
SIDS Susceptibility Pathways WP1266			128.444	231.659			KCNQ1;EP300;SCN5A	RYR2;CAV3;KCNQ1;EP300;SCN5A			0.00451485	5.6263e-05			3/61	5/61

[truncated: 2 more sheets: j. GO BP 2018 enrichment, k. GO MF 2018 enrichments]
